# Supplementary material for: The PRC2.1 subcomplex opposes G1 progression through regulation of CCND1 and CCND2
Source: eLife. 2025 Feb 4;13:RP97577. doi: 10.7554/eLife.97577 (PMC11793871; doi:10.7554/eLife.97577)
Supplement: Supplementary file 1. [file elife-97577-supp1.xlsx]

## Sheet: 9.2nM Colchicine
Orobaas Analyisis of 9.2nM Colchicine Whole Genome CRISPR Screen
gene	n_T18_DMSO_Rich	mean_T18_DMSO_Rich	variance_T18_DMSO_Rich	n_T18_COLCHICINE_Rich	mean_T18_COLCHICINE_Rich	variance_T18_COLCHICINE_Rich	differential_T18_COLCHICINE_Rich_vs_T18_DMSO_Rich	pval_T18_COLCHICINE_Rich_vs_T18_DMSO_Rich	fdr_T18_COLCHICINE_Rich_vs_T18_DMSO_Rich	significant_T18_COLCHICINE_Rich_vs_T18_DMSO_Rich	effect_type_T18_COLCHICINE_Rich
A1BG	4	-0.727171	0.249235	4	-0.447447	0.277517	0.346793	0.25957	0.787783	FALSE	None
A1CF	4	0.0526004	0.227783	4	-0.0796997	0.643186	-0.214106	0.451862	0.877738	FALSE	None
A2M	4	-0.422239	0.14671	4	-0.557396	0.264537	-0.0738682	0.803497	0.966154	FALSE	None
A2ML1	4	0.208971	0.804974	4	-0.13283	0.0980236	-0.423485	0.211981	0.757681	FALSE	None
A3GALT2	4	-0.0201883	0.0392308	4	-0.130283	0.214559	-0.144207	0.625509	0.929827	FALSE	None
A4GALT	4	-0.348373	0.365241	4	-0.740335	0.634538	-0.363142	0.219926	0.763093	FALSE	None
A4GNT	4	-0.283035	0.0306964	4	0.235197	0.13594	0.469293	0.106272	0.639075	FALSE	None
AAAS	4	-0.26079	0.329325	4	-0.229589	0.346523	0.0241349	0.935114	0.991165	FALSE	None
AACS	4	0.162556	0.0904542	4	-0.214294	0.077063	-0.42629	0.133889	0.681753	FALSE	None
AADAC	4	0.269521	0.844036	4	0.358001	0.0588541	-0.103297	0.751704	0.957792	FALSE	None
AADACL2	4	-0.183281	0.123598	4	0.277241	0.00567355	0.391746	0.176974	0.725864	FALSE	None
AADACL3	4	-0.119001	0.100969	4	-0.179115	0.29998	-0.0793149	0.788676	0.963739	FALSE	None
AADACL4	4	-0.227925	0.244402	4	0.332964	0.312841	0.490869	0.14927	0.694835	FALSE	None
AADAT	4	0.328533	0.175488	4	0.785953	0.0795268	0.176222	0.534091	0.905428	FALSE	None
AAED1	4	0.0221404	0.130777	4	-0.200277	0.155567	-0.257979	0.356081	0.845134	FALSE	None
AAGAB	4	-0.493573	1.28334	4	-0.973738	2.13246	-0.49324	0.101686	0.631521	FALSE	None
AAK1	4	-0.367015	0.125696	4	-0.396431	0.18584	0.00309232	0.991126	0.998365	FALSE	None
AAMDC	4	0.362629	0.124848	4	-0.219299	0.292155	-0.669866	0.0298945	0.437506	FALSE	None
AAMP	4	-2.70031	1.21838	4	-2.45139	1.59581	0.278134	0.345816	0.838179	FALSE	None
AANAT	4	-0.188725	0.0833686	4	0.21485	0.194285	0.338273	0.236574	0.773263	FALSE	None
AAR2	4	0.0721255	0.0253106	4	-0.386781	0.234988	-0.472463	0.115222	0.656013	FALSE	None
AARD	4	-0.695275	1.18941	4	-0.817689	0.673878	-0.0884631	0.783207	0.96339	FALSE	None
AARS	4	-3.51415	0.155369	4	-3.47646	0.230923	-7.29947e-06	0.999979	0.999997	FALSE	None
AARS2	4	-0.950057	2.44083	4	-1.15334	2.70891	-0.314058	0.314959	0.81987	FALSE	None
AARSD1	NA	NA	NA	NA	NA	NA	NA	NA	NA	NA	None
AASDH	4	-0.439617	0.537141	4	-0.519469	0.29333	-0.0235361	0.945882	0.992121	FALSE	None
AASDHPPT	4	-2.94688	0.348588	4	-3.62851	0.249972	-0.697347	0.0423995	0.490633	FALSE	None
AASS	4	0.138387	0.0641824	4	-0.0122903	0.0241917	-0.226127	0.418115	0.868468	FALSE	None
AATF	4	-1.21591	0.198945	4	-1.35278	0.926775	-0.0478029	0.869971	0.97935	FALSE	None
AATK	4	-0.554256	0.175303	4	-0.130246	0.314427	0.460703	0.169615	0.716948	FALSE	None
ABAT	4	0.264361	0.15821	4	-0.17436	0.122762	-0.510849	0.0867842	0.610199	FALSE	None
ABCA1	4	0.262783	0.610253	4	-0.140767	0.40953	-0.527169	0.0756278	0.586758	FALSE	None
ABCA10	3	-0.232351	0.273531	3	0.0905042	0.0769017	0.2831	0.398005	0.860909	FALSE	None
ABCA12	4	0.0475759	0.160077	4	0.28331	0.0296675	0.128596	0.652806	0.937212	FALSE	None
ABCA13	4	-0.529538	0.0697154	4	-0.545314	0.280024	0.0497945	0.864128	0.97935	FALSE	None
ABCA2	4	0.0778404	0.221211	4	-0.061975	0.669572	-0.226929	0.422756	0.870634	FALSE	None
ABCA3	4	-0.367393	0.806079	4	-0.235362	0.347177	0.14075	0.703833	0.949252	FALSE	None
ABCA4	3	-0.0162447	0.103252	3	0.0114622	0.475753	-0.0380588	0.907767	0.985488	FALSE	None
ABCA5	4	-0.0164895	0.507014	4	0.0449415	0.337264	-0.0359733	0.899486	0.983392	FALSE	None
ABCA6	4	-0.0890978	0.0743484	4	-0.302452	0.387763	-0.213943	0.50067	0.897964	FALSE	None
ABCA7	4	-0.0753028	0.244911	4	0.00535385	0.281454	0.0285969	0.925077	0.989769	FALSE	None
ABCA8	4	-0.00279074	0.154939	4	-0.248831	0.327414	-0.277505	0.334936	0.830675	FALSE	None
ABCA9	4	0.0731109	0.158337	4	-0.362711	0.728678	-0.480803	0.100233	0.629422	FALSE	None
ABCB1	4	-0.290509	0.40832	4	-1.02932	0.19024	-0.664801	0.035458	0.46594	FALSE	None
ABCB10	4	-0.0247212	0.102369	4	-0.642846	0.158757	-0.588403	0.0534931	0.5211	FALSE	None
ABCB11	4	0.0518844	0.195841	4	0.0200846	0.684942	-0.10827	0.744115	0.956272	FALSE	None
ABCB4	4	-0.0279851	0.0646173	4	-0.245488	0.122081	-0.234287	0.423754	0.870983	FALSE	None
ABCB5	4	0.11969	0.416037	4	0.47191	0.201929	0.179609	0.536292	0.905608	FALSE	None
ABCB6	4	-0.0269187	0.495699	4	0.401779	0.0330386	0.309922	0.334203	0.830542	FALSE	None
ABCB7	4	-2.37938	1.64737	4	-1.96546	1.59828	0.471205	0.115701	0.656013	FALSE	None
ABCB8	4	-0.417679	0.192391	4	-0.349046	0.286252	0.0900228	0.750132	0.957723	FALSE	None
ABCB9	4	-0.451222	0.217425	4	-0.392116	0.0795841	0.106879	0.717289	0.951114	FALSE	None
ABCC1	4	-0.000396966	0.351766	4	-3.17646	0.118398	-3.06877	1.30182e-09	5.7163e-06	TRUE	Negative
ABCC10	4	-0.0544824	0.110039	4	0.0778792	0.194034	0.0742959	0.80856	0.967547	FALSE	None
ABCC11	4	-0.167934	0.576075	4	-0.441742	0.27856	-0.260717	0.429475	0.871768	FALSE	None
ABCC12	4	-0.0540522	0.0644229	4	-0.102376	0.420458	-0.0832866	0.790618	0.963931	FALSE	None
ABCC2	4	-0.126828	0.022013	4	-0.124282	0.0747565	-0.0182625	0.94755	0.992398	FALSE	None
ABCC3	4	-0.0933339	0.840513	4	-0.235903	0.631151	-0.204059	0.518318	0.902137	FALSE	None
ABCC4	4	0.221736	0.158964	4	0.659551	0.309305	0.216538	0.475325	0.884933	FALSE	None
ABCC5	4	0.215401	0.0124877	4	-0.297128	0.150703	-0.557202	0.057802	0.533887	FALSE	None
ABCC6	4	-1.27921	0.0861259	4	-1.34937	0.286329	0.0445703	0.881214	0.98087	FALSE	None
ABCC8	4	-0.0156489	0.320448	4	-0.19513	0.227457	-0.217676	0.462777	0.88113	FALSE	None
ABCC9	4	-0.259622	0.213747	4	-0.47858	0.110031	-0.190275	0.499738	0.897525	FALSE	None
ABCD1	4	0.0545617	0.302556	4	0.824983	0.749286	0.502631	0.0943166	0.619631	FALSE	None
ABCD2	4	-0.223684	0.0458245	4	-0.305231	0.200242	-0.0657879	0.823134	0.970499	FALSE	None
ABCD3	4	-0.00150614	0.694661	4	-0.473862	0.670764	-0.507639	0.126126	0.671839	FALSE	None
ABCD4	4	-0.273972	0.0348634	4	0.0403808	0.0191969	0.291608	0.307028	0.8169	FALSE	None
ABCE1	4	-2.4625	1.6741	4	-1.92764	3.14454	0.538841	0.0765348	0.58907	FALSE	None
ABCF1	4	-1.46632	3.4772	4	-1.34278	4.5469	0.0574275	0.843685	0.975967	FALSE	None
ABCF2	4	-0.252181	0.266089	4	0.000382309	0.212504	0.222523	0.449109	0.876667	FALSE	None
ABCF3	4	0.0955008	0.147825	4	-0.484269	0.433621	-0.583599	0.0833331	0.60401	FALSE	None
ABCG1	4	-0.410187	1.14766	4	-0.359936	0.180515	0.0613932	0.858743	0.97879	FALSE	None
ABCG2	4	0.182787	0.0395487	4	0.329206	0.3339	0.00934574	0.975489	0.996635	FALSE	None
ABCG4	3	0.273525	0.0515754	3	0.477187	0.0822464	0.0212653	0.948385	0.992398	FALSE	None
ABCG5	4	-0.232183	0.718779	4	-0.200156	0.295851	0.00267297	0.993152	0.998655	FALSE	None
ABCG8	4	-0.0561822	0.377434	4	-0.0558886	0.347114	-0.0520071	0.865654	0.97935	FALSE	None
ABHD1	4	0.257914	0.077695	4	-0.0675853	0.0659238	-0.410116	0.149574	0.694835	FALSE	None
ABHD10	4	-0.150325	0.510114	4	0.118877	0.358542	0.218319	0.55151	0.908449	FALSE	None
ABHD11	4	-1.61427	0.97558	4	-1.76014	0.952276	-0.0564557	0.837943	0.974806	FALSE	None
ABHD12	4	-0.214036	0.351323	4	-0.111878	0.652465	0.0544338	0.84824	0.976794	FALSE	None
ABHD12B	4	-0.297835	0.0901876	4	-0.135944	0.230984	0.160933	0.577628	0.916925	FALSE	None
ABHD13	4	-0.0713302	0.117544	4	-0.0248512	0.153845	0.000895404	0.997411	0.999491	FALSE	None
ABHD14A	4	-0.0674068	0.25784	4	0.105558	0.129367	0.105939	0.719053	0.951786	FALSE	None
ABHD14B	4	-0.429681	0.0484957	4	-0.899442	0.567947	-0.384272	0.229786	0.767439	FALSE	None
ABHD15	4	-0.32531	0.522586	4	-0.634935	0.147795	-0.258217	0.423845	0.870983	FALSE	None
ABHD16A	4	-0.49316	0.389072	4	-0.936147	1.04226	-0.39061	0.209999	0.757442	FALSE	None
ABHD16B	4	0.0247928	0.45274	4	0.484744	0.0591183	0.31288	0.319152	0.820921	FALSE	None
ABHD17A	3	-0.49271	0.224739	3	-1.10026	0.806619	-0.542319	0.114544	0.655991	FALSE	None
ABHD17B	4	-0.14294	0.251694	4	0.359002	0.440839	0.38785	0.195322	0.745142	FALSE	None
ABHD17C	4	-0.242866	0.18218	4	-0.197172	0.320508	0.0468651	0.878763	0.980182	FALSE	None
ABHD2	4	-0.172884	0.350776	4	-0.596098	0.034498	-0.381794	0.225014	0.765044	FALSE	None
ABHD3	4	-0.0166922	0.196371	4	-0.0979966	0.788551	-0.123934	0.727048	0.952749	FALSE	None
ABHD4	4	-0.0451271	0.342537	4	-0.77204	0.71749	-0.710063	0.0257594	0.420091	FALSE	None
ABHD5	4	-0.0195621	0.0418711	4	0.386389	0.109577	0.294649	0.307957	0.8169	FALSE	None
ABHD6	4	0.238644	0.115796	4	-0.233428	0.59808	-0.541431	0.0912598	0.617801	FALSE	None
ABHD8	4	0.190908	0.206836	4	0.0864911	0.331982	-0.214089	0.469449	0.88254	FALSE	None
ABI1	4	-0.204114	0.340147	4	-0.507604	0.68192	-0.297977	0.324974	0.824682	FALSE	None
ABI2	4	-0.257587	0.198174	4	-0.0659363	0.013976	0.180786	0.531286	0.904489	FALSE	None
ABI3	4	-0.23059	0.285446	4	-0.177955	0.522107	0.0255692	0.929955	0.990587	FALSE	None
ABI3BP	4	-0.115194	0.0565124	4	0.374333	0.0528095	0.392786	0.165705	0.710539	FALSE	None
ABL1	4	-0.261894	0.402942	4	-0.56049	0.306066	-0.27787	0.346072	0.838179	FALSE	None
ABL2	4	0.37846	1.20812	4	0.252937	0.251203	-0.350671	0.3092	0.8169	FALSE	None
ABLIM1	4	-0.287897	0.226524	4	-0.292058	0.137024	0.00793327	0.977372	0.996765	FALSE	None
ABLIM2	4	-0.266008	0.241596	4	0.173695	0.169259	0.389958	0.185705	0.734293	FALSE	None
ABLIM3	4	0.124359	0.201672	4	0.258039	0.0543429	0.0143229	0.95999	0.994079	FALSE	None
ABR	4	0.129128	0.234662	4	0.0247043	0.233581	-0.188905	0.534442	0.905428	FALSE	None
ABRA	4	0.270588	0.0593507	4	0.451786	0.162221	-0.000761372	0.997827	0.999491	FALSE	None
ABRACL	4	0.278972	0.070851	4	-0.132008	0.150674	-0.491854	0.0878817	0.613251	FALSE	None
ABT1	4	-2.20645	0.292889	4	-2.22479	0.675705	0.0531524	0.854362	0.977788	FALSE	None
ABTB1	4	-0.0202534	0.109001	4	0.158554	0.40573	0.0896301	0.753647	0.958027	FALSE	None
ABTB2	4	0.308726	0.122148	4	-0.0014353	0.0132637	-0.413053	0.156483	0.699342	FALSE	None
AC007040.11	3	0.0130153	0.032874	3	0.149927	0.0953113	0.0558572	0.865196	0.97935	FALSE	None
AC007431.1	4	-0.904308	0.847239	4	-0.907686	0.378931	0.0801722	0.793135	0.964257	FALSE	None
AC009892.10	NA	NA	NA	NA	NA	NA	NA	NA	NA	NA	None
AC016722.1	4	-0.550502	0.308073	4	-0.205038	0.157181	0.382277	0.22132	0.763425	FALSE	None
AC016757.3	4	-0.0787442	0.00896908	4	0.271879	0.395184	0.262634	0.381065	0.85833	FALSE	None
AC018755.1	4	-0.0601257	0.35881	4	-0.0156826	0.183875	-0.00917419	0.975785	0.996635	FALSE	None
AC079612.1	4	0.39529	0.202838	4	0.473511	0.0118663	-0.123982	0.678088	0.944633	FALSE	None
AC091801.1	3	0.48352	0.0718421	3	-0.101782	0.187068	-0.704173	0.0416985	0.489711	FALSE	None
AC093802.1	4	0.295378	0.160994	4	0.425425	0.0868738	-0.0571041	0.838725	0.975116	FALSE	None
AC106876.2	4	0.0647458	0.116896	4	-0.522669	0.253806	-0.581975	0.05922	0.536431	FALSE	None
ACAA1	3	-0.262955	0.575541	3	-0.070784	0.355493	0.170372	0.644508	0.935627	FALSE	None
ACAA2	4	0.110885	0.0674755	4	-0.0848195	0.114786	-0.253695	0.388176	0.858661	FALSE	None
ACACA	4	-1.71967	2.50567	4	-1.92787	2.51698	-0.186288	0.567036	0.914044	FALSE	None
ACACB	4	-0.107856	0.0101001	4	0.0268002	0.0764502	0.0913042	0.743867	0.956272	FALSE	None
ACAD10	4	-0.127285	0.509033	4	0.130566	0.622323	0.153877	0.579826	0.917246	FALSE	None
ACAD11	4	-0.0869184	0.189516	4	-0.101623	0.781053	-0.0455973	0.899684	0.983392	FALSE	None
ACAD8	4	0.153283	0.19075	4	0.210938	0.224972	-0.0700292	0.803348	0.966154	FALSE	None
ACAD9	4	-2.26879	0.360621	4	-2.15033	0.0916114	0.196939	0.5207	0.902784	FALSE	None
ACADL	4	-0.0574679	0.373195	4	-0.149833	0.24966	-0.131254	0.666733	0.940329	FALSE	None
ACADM	4	-0.419046	1.10817	4	-0.287109	1.0748	0.0721209	0.808515	0.967547	FALSE	None
ACADS	4	-0.0193428	0.668095	4	-0.081802	0.074653	-0.114719	0.7216	0.952495	FALSE	None
ACADSB	4	0.00582929	0.264454	4	0.0099769	0.318119	-0.0656919	0.823276	0.970602	FALSE	None
ACADVL	4	-0.0756643	0.266786	4	-0.0317726	0.237303	-0.00869947	0.975079	0.996635	FALSE	None
ACAN	4	-0.261062	1.0851	4	0.247128	0.664533	0.408626	0.25571	0.786151	FALSE	None
ACAP1	4	-0.17467	0.336446	4	-0.171881	0.229378	-0.0192438	0.946784	0.992398	FALSE	None
ACAP2	4	-0.00405694	0.267246	4	-0.181329	0.237588	-0.207071	0.521928	0.903017	FALSE	None
ACAP3	4	-0.680206	0.539771	4	-0.599853	0.342275	0.130952	0.638709	0.933726	FALSE	None
ACAT1	4	-0.196708	0.221943	4	0.188177	0.0626458	0.327493	0.274067	0.797896	FALSE	None
ACAT2	4	-0.0839591	0.723377	4	0.768846	0.238932	0.622065	0.0617826	0.543857	FALSE	None
ACBD3	4	0.204032	0.412856	4	0.271391	0.0624775	-0.0761492	0.804622	0.966713	FALSE	None
ACBD4	4	-0.81232	0.514015	4	-0.523869	0.536005	0.334588	0.244368	0.779329	FALSE	None
ACBD5	4	0.230168	0.0599448	4	-0.254017	0.051914	-0.53593	0.0684257	0.568935	FALSE	None
ACBD6	4	-0.0893276	0.0873819	4	-0.572467	1.97735	-0.502494	0.184365	0.732937	FALSE	None
ACBD7	4	-0.14622	0.344771	4	0.903083	0.927054	0.83331	0.0275572	0.431731	FALSE	None
ACCS	4	-0.0414993	0.31379	4	0.0834919	0.264527	0.0412469	0.887492	0.981794	FALSE	None
ACCSL	4	0.151587	0.0443576	4	-0.251337	0.139092	-0.443912	0.140982	0.689903	FALSE	None
ACD	4	-0.83354	0.0033656	4	0.0185183	0.0429123	0.905068	0.00339447	0.166646	TRUE	Positive
ACE	4	-0.0550431	0.304601	4	-0.160726	0.0684554	-0.134626	0.657457	0.938492	FALSE	None
ACE2	4	-0.113162	0.270624	4	-0.188477	0.17902	-0.0917992	0.767389	0.959934	FALSE	None
ACER1	4	-0.522131	0.155142	4	-0.0435791	0.359959	0.479965	0.0958285	0.621298	FALSE	None
ACER2	4	0.136827	0.403448	4	0.203548	0.410644	-0.0896309	0.755906	0.958267	FALSE	None
ACER3	4	-0.40511	0.635094	4	-0.416991	0.173004	0.00481992	0.98691	0.998365	FALSE	None
ACHE	4	-0.330866	0.032381	4	-0.163751	1.21883	0.148904	0.641523	0.934925	FALSE	None
ACIN1	4	-0.320608	0.0786662	4	-0.283664	0.211374	0.0562446	0.844727	0.975967	FALSE	None
ACKR2	4	-0.0152057	0.123611	4	-0.00555819	0.390194	-0.0483675	0.871136	0.97935	FALSE	None
ACKR3	4	0.31435	0.0160771	4	0.15221	0.0217273	-0.287627	0.304263	0.8169	FALSE	None
ACKR4	4	-0.2807	0.0124221	4	-0.361991	0.029022	-0.0483138	0.862246	0.979338	FALSE	None
ACLY	4	-1.85323	1.64578	4	-2.31984	4.30022	-0.476229	0.148073	0.694835	FALSE	None
ACMSD	4	-0.468887	0.500802	4	-0.707862	0.876141	-0.221785	0.429398	0.871768	FALSE	None
ACN9	4	-0.7035	0.427975	4	-0.412833	0.582862	0.325457	0.268957	0.794475	FALSE	None
ACO1	4	0.0629944	0.466986	4	-0.11828	0.601125	-0.254664	0.4353	0.87189	FALSE	None
ACO2	4	-1.55194	1.23412	4	-1.00248	1.70087	0.572778	0.0749056	0.58499	FALSE	None
ACOT11	4	-0.281691	0.0830497	4	-0.0274116	0.374531	0.238574	0.442731	0.874276	FALSE	None
ACOT12	3	-0.160322	0.182636	3	-0.00928449	0.0108141	0.11918	0.72186	0.952495	FALSE	None
ACOT13	4	-0.335476	0.171722	4	-0.0805419	0.436033	0.245883	0.430311	0.871768	FALSE	None
ACOT2	4	-0.262949	0.394386	4	-0.0178081	0.139576	0.227895	0.497354	0.895951	FALSE	None
ACOT4	4	-0.582385	0.57666	4	-0.381392	0.966109	0.201975	0.48265	0.888306	FALSE	None
ACOT6	4	0.184112	0.415163	4	-0.389774	0.46393	-0.632031	0.0381336	0.479098	FALSE	None
ACOT7	4	-0.120432	0.673294	4	-0.538415	0.051395	-0.405238	0.19657	0.745241	FALSE	None
ACOT8	4	-0.227684	0.673191	4	-0.336093	0.206616	-0.1204	0.690922	0.946889	FALSE	None
ACOT9	4	0.141267	0.152137	4	0.512056	0.789765	0.179886	0.574401	0.916265	FALSE	None
ACOX1	4	0.154935	0.0409443	4	0.340033	0.219092	0.0472901	0.865849	0.97935	FALSE	None
ACOX2	4	-0.318983	0.0885611	4	-0.911944	0.196913	-0.518421	0.0716032	0.575278	FALSE	None
ACOX3	4	0.122954	0.101043	4	0.2722	0.416757	0.0248379	0.932766	0.990634	FALSE	None
ACOXL	4	0.023801	0.446553	4	-0.0665641	0.325984	-0.155625	0.617319	0.927842	FALSE	None
ACP1	4	-0.00276363	0.112486	4	0.069757	0.231799	0.000458507	0.998719	0.9998	FALSE	None
ACP2	4	-0.187771	0.473715	4	-0.401683	0.14413	-0.197842	0.544996	0.907728	FALSE	None
ACP5	4	-0.0208596	0.121882	4	-0.0848832	0.216607	-0.11141	0.68763	0.946135	FALSE	None
ACP6	4	0.0704445	0.22498	4	-0.549051	0.220819	-0.611848	0.055828	0.528321	FALSE	None
ACPL2	4	0.164874	0.446084	4	0.0797975	0.0694839	-0.19537	0.530754	0.904489	FALSE	None
ACPP	4	0.243564	0.365531	4	0.231567	0.0907508	-0.15924	0.589373	0.919305	FALSE	None
ACPT	3	-0.29309	0.241179	3	-0.456942	0.0280345	-0.121925	0.725484	0.952749	FALSE	None
ACR	4	-0.869328	0.273489	4	-0.708747	0.880214	0.23092	0.449147	0.876667	FALSE	None
ACRBP	4	-0.305659	0.184611	4	-0.182623	0.313471	0.12488	0.665332	0.939993	FALSE	None
ACRC	3	0.359401	0.37606	3	1.15612	0.366238	0.374184	0.291632	0.808043	FALSE	None
ACRV1	4	-0.113403	0.502835	4	0.676256	0.320518	0.621825	0.0636055	0.550351	FALSE	None
ACSBG1	4	0.0501879	0.0757393	4	0.0704443	0.216156	-0.0550059	0.852124	0.977458	FALSE	None
ACSBG2	4	-0.357973	0.0570707	4	-0.307079	0.0232225	0.0863855	0.761133	0.958844	FALSE	None
ACSF2	4	-0.122584	0.0293934	4	-0.0368016	0.0166715	0.0527548	0.850679	0.97721	FALSE	None
ACSF3	4	-0.521986	0.508206	4	-1.05359	1.45271	-0.49741	0.106694	0.639075	FALSE	None
ACSL1	4	0.376084	0.172573	4	0.49225	0.416432	-0.128622	0.660502	0.938874	FALSE	None
ACSL3	4	-0.0246312	0.0852162	4	-0.0594025	0.0786945	-0.0779416	0.789868	0.963931	FALSE	None
ACSL4	4	0.0813607	0.138317	4	0.573807	0.75611	0.314001	0.330117	0.827706	FALSE	None
ACSL5	4	-0.29557	1.66395	4	-0.311659	1.25274	-0.122428	0.671234	0.942553	FALSE	None
ACSL6	4	0.00283734	0.487785	4	0.26291	0.266932	0.164675	0.647354	0.936352	FALSE	None
ACSM1	4	-0.0905421	0.392098	4	0.397802	0.101825	0.387023	0.252675	0.785454	FALSE	None
ACSM2A	NA	NA	NA	NA	NA	NA	NA	NA	NA	NA	None
ACSM2B	4	-0.305609	0.115649	4	0.173484	0.1671	0.437454	0.124567	0.668941	FALSE	None
ACSM3	4	-0.279146	0.232458	4	0.0771784	0.0802348	0.324473	0.262001	0.789001	FALSE	None
ACSM4	4	-0.246278	0.334749	4	0.0643947	0.331242	0.256503	0.35984	0.84733	FALSE	None
ACSM5	4	-0.289725	0.144633	4	-0.0601338	0.0593685	0.219982	0.434425	0.871768	FALSE	None
ACSS1	4	-0.273884	0.0157344	4	-0.0163283	0.0338978	0.242912	0.381842	0.858524	FALSE	None
ACSS2	4	-0.0514125	0.242729	4	-0.60335	1.17867	-0.576029	0.0616481	0.543296	FALSE	None
ACSS3	3	-0.332744	0.373018	3	-0.451566	1.78552	-0.141707	0.699846	0.948491	FALSE	None
ACTA1	3	0.121131	0.279183	3	-0.6084	0.0574138	-0.723482	0.045912	0.501881	FALSE	None
ACTA2	4	0.586493	0.0544369	4	-0.248203	0.478939	-0.949322	0.00460088	0.198008	TRUE	Negative
ACTB	3	-2.02989	0.319102	3	-2.29501	0.598538	-0.182495	0.609596	0.926018	FALSE	None
ACTBL2	4	0.110384	0.0920173	4	0.17257	0.135135	-0.0365212	0.899756	0.983392	FALSE	None
ACTC1	4	-0.497205	0.215546	4	-0.987046	1.61129	-0.430424	0.238062	0.773438	FALSE	None
ACTG1	4	-1.18699	0.229166	4	-0.912111	1.03065	0.362035	0.237234	0.773263	FALSE	None
ACTG2	4	-0.33298	0.505337	4	-0.806039	0.525354	-0.430345	0.170235	0.717719	FALSE	None
ACTL10	4	-0.157521	0.208719	4	-0.679593	0.234041	-0.47893	0.104405	0.635263	FALSE	None
ACTL6A	3	-2.56524	3.64233	3	-2.33666	0.482534	0.267278	0.49101	0.893134	FALSE	None
ACTL6B	4	-0.216082	0.0875594	4	-0.141173	1.13145	0.0344024	0.907954	0.985488	FALSE	None
ACTL7A	4	0.0334194	0.586384	4	-0.0891787	0.276663	-0.200466	0.491992	0.893292	FALSE	None
ACTL7B	4	-0.204511	0.168742	4	-0.578116	0.490159	-0.343362	0.258126	0.787318	FALSE	None
ACTL8	3	0.223271	0.0258955	3	0.173495	0.0214801	-0.162573	0.62235	0.929141	FALSE	None
ACTL9	4	0.229471	0.0389026	4	0.24665	0.824043	-0.131696	0.678928	0.944813	FALSE	None
ACTN1	4	0.067097	0.67723	4	0.037307	0.32481	-0.138854	0.658699	0.938492	FALSE	None
ACTN2	4	0.0854358	0.0251854	4	0.946443	0.125224	0.624702	0.03904	0.48284	FALSE	None
ACTN4	4	0.335554	0.154406	4	0.332708	0.0460472	-0.164195	0.582641	0.917735	FALSE	None
ACTR10	4	-2.59372	0.469487	4	-2.92456	0.501469	-0.303511	0.285325	0.802212	FALSE	None
ACTR1A	4	-1.47174	1.60196	4	-1.94326	4.24288	-0.504031	0.106144	0.639075	FALSE	None
ACTR1B	4	-0.999694	2.90025	4	-2.28494	1.26883	-1.23304	0.00073002	0.0641104	TRUE	Negative
ACTR2	4	-3.16217	0.215118	4	-2.73468	0.0933101	0.454491	0.117641	0.659033	FALSE	None
ACTR3	4	-1.64199	1.25897	4	-1.173	1.20599	0.530048	0.123281	0.667171	FALSE	None
ACTR3B	3	-0.348257	0.203001	3	-0.0359019	0.102112	0.303319	0.362159	0.848015	FALSE	None
ACTR3C	NA	NA	NA	NA	NA	NA	NA	NA	NA	NA	None
ACTR5	4	-1.92997	1.83048	4	-2.56846	0.650552	-0.578694	0.0628312	0.548346	FALSE	None
ACTR6	4	-3.82495	0.316969	4	-3.25884	0.970872	0.528448	0.145162	0.692271	FALSE	None
ACTR8	4	-2.40052	0.807503	4	-2.14872	2.13416	0.310728	0.415231	0.867224	FALSE	None
ACTRT1	4	0.523124	0.0900776	4	1.13422	0.197284	0.178842	0.533596	0.905428	FALSE	None
ACTRT2	4	0.0699513	0.132174	4	0.34155	0.644302	0.14865	0.663733	0.939691	FALSE	None
ACTRT3	4	-0.29947	0.0505061	4	0.105338	0.141956	0.373404	0.185554	0.734061	FALSE	None
ACVR1	4	-0.859283	0.182073	4	-0.577969	1.71877	0.336648	0.353473	0.842684	FALSE	None
ACVR1B	4	-0.153062	0.395508	4	-0.525599	0.546499	-0.37989	0.180492	0.729721	FALSE	None
ACVR1C	4	0.251419	0.134716	4	-0.265804	0.224742	-0.578893	0.0519309	0.51811	FALSE	None
ACVR2A	4	-0.433132	0.150915	4	-0.82727	0.206578	-0.307151	0.314243	0.819465	FALSE	None
ACVR2B	4	-0.865997	0.588075	4	-1.09218	1.11065	-0.158647	0.589706	0.919517	FALSE	None
ACVRL1	4	-0.43506	0.210242	4	-0.605503	0.337971	-0.104706	0.739744	0.956272	FALSE	None
ACY1	4	-0.451476	0.117467	4	-0.43089	0.333495	0.0704242	0.809336	0.967725	FALSE	None
ACY3	4	-0.170314	0.14244	4	-0.553034	0.430185	-0.358105	0.222442	0.764166	FALSE	None
ACYP1	4	0.295257	0.128029	4	0.117592	0.105337	-0.300705	0.299	0.813071	FALSE	None
ACYP2	4	-0.124504	0.263597	4	-0.00344185	0.0366293	0.0803225	0.781276	0.963258	FALSE	None
ADA	4	-0.426094	0.151388	4	-0.778269	0.212926	-0.284236	0.310819	0.8169	FALSE	None
ADAD1	4	0.287203	0.126356	4	0.174678	0.226035	-0.237166	0.450947	0.87697	FALSE	None
ADAD2	4	0.639079	0.043494	4	-0.0688637	0.233734	-0.860227	0.00588134	0.222725	TRUE	Negative
ADAL	4	-0.0743839	0.618912	4	0.145746	0.893126	0.0617022	0.827137	0.97178	FALSE	None
ADAM10	4	0.37412	0.0679642	4	-0.170166	0.0239645	-0.627617	0.0365063	0.468026	FALSE	None
ADAM11	4	-0.393054	0.180063	4	-0.367543	0.092333	0.0616223	0.826984	0.97178	FALSE	None
ADAM12	4	-0.263626	0.152784	4	0.174533	0.147291	0.392319	0.18397	0.732449	FALSE	None
ADAM15	4	0.0503437	0.8575	4	0.0119434	0.266706	-0.13703	0.668819	0.941482	FALSE	None
ADAM17	3	0.337807	0.374508	3	0.565581	0.540092	-0.0402953	0.902774	0.984872	FALSE	None
ADAM18	4	-0.114633	0.0667269	4	-0.129645	0.140659	-0.0405149	0.883165	0.981045	FALSE	None
ADAM19	4	-0.186125	0.122319	4	0.097497	0.599824	0.22509	0.434803	0.871768	FALSE	None
ADAM2	4	0.105591	0.0612465	4	-0.328489	0.625125	-0.468443	0.132561	0.679796	FALSE	None
ADAM20	4	-0.123343	0.259471	4	0.0880524	0.201763	0.148636	0.607267	0.925612	FALSE	None
ADAM21	4	0.0628443	0.476988	4	-0.387992	0.342718	-0.485409	0.0964019	0.621815	FALSE	None
ADAM22	4	-0.192514	0.0638123	4	0.174851	0.541425	0.306909	0.317936	0.820921	FALSE	None
ADAM23	4	0.259156	0.207123	4	0.321228	0.351152	-0.100005	0.74982	0.957714	FALSE	None
ADAM28	4	0.0539847	0.260098	4	-0.21662	0.630707	-0.336429	0.234239	0.772199	FALSE	None
ADAM29	4	0.176582	0.0881564	4	0.0740452	0.0730842	-0.192389	0.515819	0.901487	FALSE	None
ADAM30	4	-0.417665	0.0853115	4	-0.441005	0.0535041	0.0286882	0.917692	0.987565	FALSE	None
ADAM32	4	0.274041	0.0984889	4	0.27152	0.169741	-0.149782	0.605282	0.924932	FALSE	None
ADAM33	4	-0.369339	0.443528	4	-0.277853	0.328938	0.0938854	0.748758	0.957712	FALSE	None
ADAM7	4	-0.12905	0.22623	4	0.0930868	0.625752	0.153105	0.609001	0.926018	FALSE	None
ADAM8	4	-0.00419118	0.167482	4	-0.266999	0.439332	-0.295525	0.291594	0.808043	FALSE	None
ADAM9	4	-0.393094	0.531306	4	0.117589	0.178887	0.472079	0.123439	0.667171	FALSE	None
ADAMDEC1	4	0.331432	0.275471	4	-0.0422604	0.0578061	-0.478312	0.118679	0.660909	FALSE	None
ADAMTS1	4	-0.447931	1.00709	4	-0.202621	0.271617	0.247616	0.494748	0.894143	FALSE	None
ADAMTS10	4	-0.338888	0.289544	4	0.213008	0.0267871	0.512433	0.098092	0.625723	FALSE	None
ADAMTS12	3	0.0965726	0.149421	3	0.152549	0.835414	-0.0684527	0.839721	0.975231	FALSE	None
ADAMTS13	4	-0.162646	0.192115	4	-0.0558084	0.222893	0.0761093	0.792938	0.964151	FALSE	None
ADAMTS14	4	0.0609775	0.194994	4	-0.13291	0.226234	-0.238876	0.454915	0.878027	FALSE	None
ADAMTS15	4	0.35722	0.108436	4	0.421439	0.184551	-0.127277	0.661324	0.938973	FALSE	None
ADAMTS16	4	-0.326202	1.26206	4	-0.0429475	0.392862	0.214022	0.481772	0.887855	FALSE	None
ADAMTS17	4	-0.0980392	0.267953	4	-0.0848776	0.274156	-0.0337371	0.902966	0.984872	FALSE	None
ADAMTS18	4	0.241889	0.0731336	4	-0.173646	1.03175	-0.508225	0.127011	0.674373	FALSE	None
ADAMTS19	4	0.119991	0.615667	4	-0.0986559	0.340775	-0.314665	0.305405	0.8169	FALSE	None
ADAMTS2	4	-0.372918	0.789416	4	-0.495099	1.87749	-0.17113	0.56191	0.911553	FALSE	None
ADAMTS20	4	0.38117	0.371363	4	-0.147595	0.44293	-0.626957	0.0705351	0.572579	FALSE	None
ADAMTS3	4	-0.237593	0.0114779	4	0.190662	0.175446	0.378742	0.197623	0.746464	FALSE	None
ADAMTS4	4	-0.151744	0.0342196	4	-0.322155	0.120546	-0.161784	0.571992	0.916141	FALSE	None
ADAMTS5	4	-0.061768	0.2559	4	-0.140213	0.693074	-0.13654	0.641269	0.934903	FALSE	None
ADAMTS7	4	0.0159028	0.375007	4	-0.243569	0.178062	-0.282636	0.404547	0.862628	FALSE	None
ADAMTS8	4	0.290647	0.222258	4	0.095333	0.0545907	-0.315943	0.271505	0.795654	FALSE	None
ADAMTS9	4	-0.187146	0.250652	4	-0.113662	0.247621	0.056369	0.857096	0.978478	FALSE	None
ADAMTSL1	4	0.11336	0.149003	4	0.608031	0.0607398	0.31792	0.282598	0.800392	FALSE	None
ADAMTSL2	4	-0.143669	0.471985	4	-0.799808	0.601837	-0.643927	0.0287375	0.433934	FALSE	None
ADAMTSL3	4	-0.576443	0.379888	4	-0.604117	0.109132	0.0549061	0.864958	0.97935	FALSE	None
ADAMTSL4	4	0.0296518	0.668217	4	-0.3701	0.385347	-0.445048	0.14745	0.694835	FALSE	None
ADAMTSL4-AS1	4	0.199746	0.0713583	4	-0.047568	0.099297	-0.323319	0.278784	0.799578	FALSE	None
ADAMTSL5	4	-0.501196	0.602182	4	-0.490567	0.0811242	0.0604283	0.850589	0.97721	FALSE	None
ADAP1	4	-0.0103914	0.173129	4	0.3625	0.181989	0.263143	0.398719	0.860909	FALSE	None
ADAP2	4	-0.563175	0.264077	4	-0.202913	0.0182188	0.401932	0.186734	0.735874	FALSE	None
ADAR	4	-0.157089	0.0769599	4	-0.952958	1.06846	-0.742041	0.0326777	0.449298	FALSE	None
ADARB1	4	0.189032	0.080441	4	0.252113	0.165276	-0.0616406	0.833541	0.972996	FALSE	None
ADARB2	4	0.182475	0.218734	4	-0.0218686	0.860985	-0.324981	0.252	0.784635	FALSE	None
ADAT1	4	0.0047896	0.305487	4	-0.153432	0.317921	-0.212664	0.450658	0.87697	FALSE	None
ADAT2	3	-2.18739	4.04	3	-2.71713	3.95997	-0.526538	0.157225	0.700178	FALSE	None
ADAT3	4	-2.81652	1.55863	4	-2.24439	2.41986	0.587482	0.0635478	0.550351	FALSE	None
ADC	4	-0.815344	0.180821	4	-0.540032	0.308013	0.364978	0.252495	0.785375	FALSE	None
ADCK1	4	0.215265	0.140436	4	0.487166	0.0796062	0.0951583	0.739117	0.956272	FALSE	None
ADCK2	4	-0.206876	0.644844	4	-0.420543	0.318796	-0.219861	0.455455	0.878191	FALSE	None
ADCK3	4	-0.141195	0.264187	4	0.0899492	0.404193	0.169537	0.585553	0.918582	FALSE	None
ADCK4	4	-0.177141	0.262503	4	-0.264962	0.16888	-0.0946206	0.739026	0.956272	FALSE	None
ADCK5	3	0.0441746	0.867339	3	-0.274603	0.581626	-0.390283	0.27876	0.799578	FALSE	None
ADCY1	4	-0.439224	0.0279393	4	-0.614131	0.506379	-0.115324	0.701707	0.948952	FALSE	None
ADCY10	4	-0.114334	0.0211634	4	0.212219	0.563382	0.252247	0.420723	0.870075	FALSE	None
ADCY2	4	0.140675	0.0588513	4	0.0207551	0.191385	-0.204327	0.465037	0.881942	FALSE	None
ADCY3	4	0.132705	0.21421	4	0.288418	0.0423349	0.0283996	0.921635	0.988789	FALSE	None
ADCY4	4	-0.0942385	0.24459	4	-0.310027	0.356743	-0.218374	0.507761	0.898846	FALSE	None
ADCY5	4	-0.087665	0.112635	4	0.093007	0.20458	0.118299	0.682172	0.945399	FALSE	None
ADCY6	4	-0.0535588	0.109213	4	-0.432513	0.58838	-0.383646	0.218863	0.761724	FALSE	None
ADCY7	4	-0.683341	0.215135	4	0.00712796	0.381622	0.71944	0.0303293	0.437506	FALSE	None
ADCY8	3	-0.348185	0.204494	3	-0.0338456	0.54162	0.291484	0.38256	0.858661	FALSE	None
ADCY9	4	-0.0701427	0.124215	4	-0.0717977	0.153283	-0.0365456	0.904148	0.985103	FALSE	None
ADCYAP1	4	-0.901656	3.95875	4	-0.94853	3.49106	-0.109867	0.725868	0.952749	FALSE	None
ADCYAP1R1	4	0.1066	0.395914	4	0.142	0.367029	-0.0690975	0.832252	0.972626	FALSE	None
ADD1	4	0.319214	0.06122	4	-0.171929	0.303366	-0.576746	0.057966	0.533887	FALSE	None
ADD2	4	-0.578006	0.629452	4	-0.683204	0.952543	-0.0831458	0.764077	0.958866	FALSE	None
ADD3	4	0.248651	0.683728	4	0.324054	0.218659	-0.0770419	0.83236	0.972626	FALSE	None
ADGB	4	-0.148035	0.721987	4	-0.0557517	0.468758	0.0232255	0.936594	0.991167	FALSE	None
ADH1A	4	0.223538	0.0584308	4	0.139036	0.580375	-0.202263	0.515087	0.901256	FALSE	None
ADH1B	4	0.0570161	0.186649	4	0.105175	0.0957741	-0.0361185	0.897386	0.98296	FALSE	None
ADH4	4	0.0564376	0.0677599	4	-0.527545	0.226469	-0.57448	0.0695144	0.571905	FALSE	None
ADH5	4	0.0418541	0.219097	4	-0.167061	1.41545	-0.294465	0.362798	0.848597	FALSE	None
ADH6	4	-0.00401479	0.117781	4	-0.18032	0.340217	-0.214877	0.457926	0.878825	FALSE	None
ADH7	4	0.296036	0.140231	4	0.00272747	0.1657	-0.394944	0.200956	0.748905	FALSE	None
ADHFE1	4	-0.0712163	0.930009	4	-0.107085	0.394162	-0.105683	0.755357	0.958235	FALSE	None
ADI1	4	-0.978617	2.35725	4	-0.792752	1.20192	0.203314	0.510499	0.899609	FALSE	None
ADIG	4	0.247651	0.196166	4	-0.0222803	0.233694	-0.376145	0.182315	0.731424	FALSE	None
ADIPOQ	4	0.266116	0.098582	4	-0.195649	0.0982433	-0.527107	0.0827517	0.602667	FALSE	None
ADIPOR1	4	-1.05676	0.258261	4	-0.321978	0.271019	0.819596	0.013367	0.336308	TRUE	Positive
ADIPOR2	4	0.283423	0.0643051	4	-1.14596	0.161378	-1.37696	7.73695e-05	0.0134546	TRUE	Negative
ADIRF	4	-0.925747	0.927249	4	-0.640696	0.0464489	0.364599	0.251678	0.784517	FALSE	None
ADK	4	0.041681	0.0656014	4	0.415282	0.340938	0.247429	0.431535	0.871768	FALSE	None
ADM	4	0.0750639	0.230765	4	-0.0842415	0.369072	-0.218702	0.498682	0.89692	FALSE	None
ADM2	4	-0.182625	0.389993	4	-0.0434924	1.07736	0.039472	0.887077	0.981794	FALSE	None
ADM5	4	-0.126044	0.128431	4	-0.0398067	0.127986	0.0478783	0.862473	0.97935	FALSE	None
ADNP	4	-1.00851	1.41576	4	-1.59343	1.94027	-0.529257	0.0787117	0.593177	FALSE	None
ADNP2	4	0.240663	0.247497	4	0.578971	0.850462	0.0768403	0.787908	0.963703	FALSE	None
ADO	4	-0.781346	3.26665	4	-0.864277	3.17889	-0.142993	0.648058	0.93643	FALSE	None
ADORA1	4	0.539038	0.249741	4	0.254335	1.10683	-0.507021	0.154086	0.697788	FALSE	None
ADORA2A	4	-0.253898	0.272001	4	-0.0929158	0.145832	0.149537	0.631064	0.931903	FALSE	None
ADORA2B	4	-0.313746	0.0507911	4	-0.298624	0.293917	0.0370757	0.895738	0.982951	FALSE	None
ADORA3	4	-0.276458	0.211036	4	-0.131908	0.15423	0.144648	0.644226	0.935627	FALSE	None
ADPGK	4	-0.2586	0.22085	4	-0.422226	0.286073	-0.144687	0.608844	0.926018	FALSE	None
ADPRH	4	-0.444829	0.622192	4	-0.35878	0.4016	0.0965262	0.749444	0.957714	FALSE	None
ADPRHL1	4	-0.0143249	0.260522	4	0.143582	0.156139	0.0809278	0.791091	0.963931	FALSE	None
ADPRHL2	4	0.0997537	0.308668	4	-0.03996	0.531972	-0.240029	0.402177	0.862151	FALSE	None
ADPRM	4	0.063458	0.083872	4	0.00682172	0.0101332	-0.124009	0.657718	0.938492	FALSE	None
ADRA1A	4	-0.62596	0.918309	4	-0.635381	0.688709	0.00268402	0.992334	0.998365	FALSE	None
ADRA1B	4	0.0756123	0.14639	4	-0.0099715	0.177516	-0.153944	0.599356	0.923127	FALSE	None
ADRA1D	4	-0.451601	0.863557	4	-0.905022	0.587677	-0.423328	0.147475	0.694835	FALSE	None
ADRA2A	4	0.163132	0.152327	4	-0.322223	0.151866	-0.523939	0.070261	0.572579	FALSE	None
ADRA2B	4	-0.558374	0.527735	4	-0.536504	0.930966	0.0348186	0.904503	0.985161	FALSE	None
ADRA2C	4	0.260729	0.537037	4	0.542867	0.17183	0.0507255	0.86842	0.97935	FALSE	None
ADRB1	4	0.270056	0.294838	4	0.458054	0.510718	-0.0496376	0.860904	0.979146	FALSE	None
ADRB2	4	-0.423259	0.143236	4	0.155774	0.390744	0.554864	0.0781978	0.592936	FALSE	None
ADRB3	4	0.0932301	0.278058	4	0.0395225	0.345451	-0.1418	0.63686	0.932923	FALSE	None
ADRBK1	4	-0.320177	0.168785	4	-0.40095	0.373028	-0.057459	0.839581	0.975231	FALSE	None
ADRBK2	4	-0.0866596	0.0513519	4	0.137326	0.090391	0.159656	0.563746	0.912197	FALSE	None
ADRM1	4	-0.849786	1.02746	4	-0.111676	0.705984	0.729531	0.0167079	0.367031	TRUE	Positive
ADSL	4	-2.70938	0.498147	4	-3.11112	0.160017	-0.37404	0.218552	0.761724	FALSE	None
ADSS	4	-2.05049	1.05607	4	-1.79514	1.40513	0.315989	0.27078	0.795654	FALSE	None
ADSSL1	4	-0.321865	0.107138	4	0.43384	0.0817836	0.681433	0.0251567	0.415327	FALSE	None
ADTRP	4	0.225079	0.144854	4	0.147278	0.321974	-0.203415	0.48555	0.889027	FALSE	None
AEBP1	4	-0.369265	0.725584	4	-0.343887	2.3601	-0.0389294	0.909928	0.986027	FALSE	None
AEBP2	4	-0.118022	0.164823	4	0.591844	0.145517	0.567334	0.0544284	0.523079	FALSE	None
AEN	4	-0.538949	0.238143	4	-0.540619	0.139083	0.0551783	0.844061	0.975967	FALSE	None
AES	4	-0.190983	0.140704	4	-0.237905	0.179894	-0.0497365	0.858356	0.978781	FALSE	None
AFAP1	4	0.103214	0.177228	4	-0.138019	0.49688	-0.304742	0.307009	0.8169	FALSE	None
AFAP1L1	4	0.0661811	0.309316	4	-0.191098	0.339661	-0.297386	0.380508	0.858257	FALSE	None
AFAP1L2	4	-0.294246	0.062156	4	0.0841718	0.168618	0.351714	0.219289	0.762463	FALSE	None
AFF1	4	-0.330504	0.144963	4	-0.416661	0.265118	-0.0475664	0.874926	0.97935	FALSE	None
AFF2	4	0.309257	0.123482	4	0.297359	0.0863365	-0.162471	0.58503	0.91834	FALSE	None
AFF3	4	0.198889	0.116815	4	0.387163	0.777044	-0.00159008	0.995683	0.999208	FALSE	None
AFF4	4	0.294737	0.186323	4	-0.0227202	0.490349	-0.439233	0.133712	0.681401	FALSE	None
AFG3L2	4	-2.60525	1.11138	4	-2.65189	1.95798	-0.00955436	0.976013	0.996635	FALSE	None
AFM	4	0.112445	0.0607926	4	-0.167777	0.496969	-0.338135	0.2535	0.785658	FALSE	None
AFMID	4	0.0985455	0.09615	4	-0.00818787	0.0804405	-0.178525	0.521524	0.903001	FALSE	None
AFP	4	-0.0606506	0.0589607	4	-0.0115057	0.35591	-0.000206913	0.999441	0.999857	FALSE	None
AFTPH	4	-0.28924	0.120157	4	-0.196711	0.366089	0.0902799	0.749464	0.957714	FALSE	None
AGA	4	0.115562	0.254591	4	0.369565	0.307021	0.0927336	0.744762	0.956272	FALSE	None
AGAP1	4	0.817615	0.117475	4	0.890042	0.121283	-0.37125	0.205476	0.75423	FALSE	None
AGAP2	4	-0.24151	0.256065	4	-0.658637	0.274062	-0.376538	0.213275	0.758029	FALSE	None
AGAP3	4	0.0668409	0.463226	4	0.171182	0.341316	-0.0145575	0.960018	0.994079	FALSE	None
AGBL1	4	-0.0181811	0.530968	4	0.385179	0.62952	0.247911	0.438738	0.872525	FALSE	None
AGBL2	4	-0.192434	0.0427591	4	-0.625667	0.825835	-0.395568	0.223784	0.764301	FALSE	None
AGBL3	4	-0.146884	0.134673	4	0.0160448	0.214209	0.121056	0.67131	0.942553	FALSE	None
AGBL4	4	-0.0160697	0.161577	4	-0.501131	0.0684757	-0.474635	0.102811	0.634157	FALSE	None
AGBL5	4	-0.0986363	0.340475	4	0.163494	0.150387	0.195303	0.5436	0.907728	FALSE	None
AGER	4	0.533444	0.285623	4	0.0101251	0.763729	-0.725969	0.0203034	0.391948	TRUE	Negative
AGFG1	4	0.306011	0.0480337	4	-0.603572	0.233325	-0.928734	0.00282465	0.148539	TRUE	Negative
AGFG2	4	-0.378496	0.0365026	4	-0.382956	0.057253	0.0397722	0.886255	0.981794	FALSE	None
AGGF1	4	-0.486675	0.0337679	4	-0.808905	0.268635	-0.232291	0.434014	0.871768	FALSE	None
AGK	4	-0.295262	0.425432	4	-0.0498741	0.390004	0.205314	0.463178	0.88113	FALSE	None
AGL	4	0.0186343	0.264583	4	0.0773881	0.209403	-0.0246541	0.93	0.990587	FALSE	None
AGMAT	4	-0.252661	0.25518	4	-0.119872	0.196567	0.119604	0.677058	0.944312	FALSE	None
AGMO	4	-0.254359	0.316238	4	-0.272356	0.27358	-0.0199992	0.94343	0.992028	FALSE	None
AGO1	4	-0.597253	0.935411	4	-0.348157	0.378663	0.261231	0.394932	0.860909	FALSE	None
AGO2	4	-0.440744	0.0278337	4	-0.191137	0.528763	0.268644	0.379267	0.857198	FALSE	None
AGO3	4	0.0273802	0.379757	4	0.0831057	0.633896	-0.0433192	0.885776	0.981673	FALSE	None
AGO4	4	0.125967	0.114612	4	0.144875	0.530214	-0.0907624	0.769631	0.960143	FALSE	None
AGPAT1	4	-0.226775	0.0232693	4	0.27265	0.139209	0.437003	0.128826	0.676333	FALSE	None
AGPAT2	4	0.0970963	0.539395	4	-0.0675777	0.155086	-0.238487	0.451628	0.877575	FALSE	None
AGPAT3	4	0.0554993	0.154246	4	0.230149	0.0952453	0.0719641	0.796578	0.965716	FALSE	None
AGPAT4	4	0.194457	0.365766	4	-0.0790089	0.407589	-0.385895	0.193859	0.744216	FALSE	None
AGPAT5	4	-2.01469	0.0392371	4	-2.49508	0.228884	-0.405554	0.179093	0.727568	FALSE	None
AGPAT6	4	-0.481209	0.532274	4	-0.287797	0.509072	0.1946	0.492267	0.893292	FALSE	None
AGPAT9	4	-0.484036	1.04978	4	-0.0501517	0.945045	0.370375	0.210137	0.757442	FALSE	None
AGPS	4	-0.108055	0.318797	4	-0.387618	0.260342	-0.279284	0.347324	0.838544	FALSE	None
AGR2	4	0.216574	0.156252	4	0.0316297	0.357385	-0.280697	0.368479	0.851917	FALSE	None
AGR3	4	0.0123334	0.18207	4	-0.0329322	0.393677	-0.104257	0.736425	0.955796	FALSE	None
AGRN	4	0.106894	0.166199	4	0.10695	0.0960344	-0.0860976	0.773581	0.961002	FALSE	None
AGRP	4	-0.299231	0.146542	4	-0.133896	0.17803	0.163772	0.563396	0.912045	FALSE	None
AGT	4	-0.703036	0.498583	4	-0.684931	0.358742	0.0862242	0.774031	0.961002	FALSE	None
AGTPBP1	4	0.0637507	0.122902	4	-0.66092	0.461249	-0.701466	0.0411781	0.489711	FALSE	None
AGTR1	4	0.177284	0.0710798	4	0.0669675	0.306754	-0.214289	0.460687	0.879819	FALSE	None
AGTR2	4	0.0972533	0.0520263	4	0.93905	0.214414	0.585491	0.0449037	0.498058	FALSE	None
AGTRAP	4	-0.182057	0.713073	4	-0.105926	0.418068	0.0197337	0.948503	0.992398	FALSE	None
AGXT	4	-0.344256	0.582143	4	-0.046635	0.134707	0.275579	0.356117	0.845134	FALSE	None
AGXT2	4	-0.141111	0.0686889	4	0.0710018	0.028782	0.167069	0.548276	0.908134	FALSE	None
AHCTF1	4	-1.67517	2.04189	4	-1.21222	2.98031	0.474798	0.140728	0.689903	FALSE	None
AHCY	4	-3.10254	1.74844	4	-2.76827	3.67189	0.307225	0.319521	0.820921	FALSE	None
AHCYL1	4	-0.292737	0.276753	4	0.47776	0.361051	0.657315	0.031735	0.443458	FALSE	None
AHCYL2	4	-0.003776	0.145345	4	0.195738	0.20983	0.107262	0.70143	0.948952	FALSE	None
AHDC1	4	0.12783	0.141653	4	0.524632	0.364276	0.209073	0.450855	0.87697	FALSE	None
AHI1	3	-0.943115	0.148396	3	-0.0278555	0.547242	0.950359	0.00849746	0.268434	TRUE	Positive
AHNAK	4	0.243789	0.172687	4	0.521191	0.168446	0.0753813	0.787181	0.963478	FALSE	None
AHNAK2	NA	NA	NA	NA	NA	NA	NA	NA	NA	NA	None
AHR	4	0.0506232	0.200125	4	0.214249	0.255565	0.0554278	0.845026	0.975967	FALSE	None
AHRR	4	-0.0801696	0.0662831	4	-0.464915	0.151354	-0.369623	0.19619	0.745142	FALSE	None
AHSA1	4	0.204245	0.0825644	4	-0.351957	0.248502	-0.59461	0.0454546	0.501548	FALSE	None
AHSA2	4	-0.0623251	0.2941	4	-0.521155	1.20864	-0.491914	0.100716	0.62988	FALSE	None
AHSG	3	-0.380526	0.249743	3	-0.162859	0.212049	0.2382	0.522089	0.903017	FALSE	None
AHSP	4	0.134494	0.257246	4	0.217695	0.4949	-0.0472976	0.874388	0.97935	FALSE	None
AICDA	4	-0.164142	0.181751	4	-0.448334	0.079113	-0.25628	0.403656	0.862222	FALSE	None
AIDA	4	-0.179735	0.325442	4	0.0720321	0.320125	0.193793	0.51118	0.899863	FALSE	None
AIF1	4	-0.0153375	0.13233	4	0.341818	0.0687918	0.2542	0.397826	0.860909	FALSE	None
AIF1L	4	-0.198546	0.258683	4	-0.269143	0.153641	-0.0741414	0.791451	0.963931	FALSE	None
AIFM1	4	-2.30991	1.77092	4	-1.33807	1.95316	1.02528	0.00461087	0.198008	TRUE	Positive
AIFM2	4	-0.0710537	0.208514	4	0.227118	0.163143	0.216764	0.469475	0.88254	FALSE	None
AIFM3	4	-0.178609	0.0410439	4	0.633818	0.494748	0.672755	0.0319527	0.444352	FALSE	None
AIG1	4	0.228805	0.0827157	4	0.212681	0.277593	-0.146526	0.622956	0.929141	FALSE	None
AIM1	4	0.00331329	0.137324	4	-0.079848	0.0545001	-0.128686	0.649099	0.936909	FALSE	None
AIM1L	4	0.0586944	0.329793	4	0.0301116	0.575559	-0.140461	0.628263	0.931173	FALSE	None
AIM2	4	-0.303544	0.514512	4	-0.251935	0.241121	0.0421659	0.883038	0.981045	FALSE	None
AIMP1	4	-0.179231	0.45772	4	0.594161	0.57341	0.605017	0.0695106	0.571905	FALSE	None
AIMP2	4	-0.134112	0.181607	4	-0.0677545	0.651273	0.012733	0.963871	0.994689	FALSE	None
AIP	4	0.16747	0.215092	4	-0.11514	0.414629	-0.349502	0.277946	0.799357	FALSE	None
AIPL1	4	-0.147422	0.0830826	4	-0.378374	0.110084	-0.218672	0.436087	0.87214	FALSE	None
AIRE	4	0.331998	0.126017	4	0.0782738	0.0364647	-0.369906	0.217147	0.76088	FALSE	None
AJAP1	4	0.115862	0.283326	4	-0.185853	0.0846037	-0.348218	0.264271	0.791113	FALSE	None
AJUBA	4	0.0522016	0.451771	4	-0.0965487	0.238009	-0.213071	0.50243	0.8985	FALSE	None
AK1	4	-0.0959063	0.0773987	4	-0.0580672	0.0485766	0.00428245	0.987831	0.998365	FALSE	None
AK2	4	-3.00716	0.191385	4	-2.85356	0.235599	0.176665	0.53982	0.906705	FALSE	None
AK3	4	-0.230395	0.490677	4	-0.187722	0.256994	0.0259585	0.930968	0.990587	FALSE	None
AK4	4	-0.493186	0.976154	4	-0.107915	1.10357	0.343464	0.326012	0.824922	FALSE	None
AK5	4	0.0306208	0.0492264	4	0.0960052	0.173124	-0.010263	0.970635	0.996566	FALSE	None
AK7	4	-0.0921005	0.436929	4	0.0774601	0.0467455	0.112691	0.718674	0.951786	FALSE	None
AK8	4	-0.0233302	0.539208	4	-0.297814	0.0296455	-0.292898	0.360513	0.8477	FALSE	None
AK9	4	0.402204	0.134682	4	0.179074	0.138548	-0.370132	0.228345	0.766905	FALSE	None
AKAP1	4	-0.427855	0.28252	4	-0.861373	0.745011	-0.386338	0.189962	0.740913	FALSE	None
AKAP10	4	0.0318335	0.160885	4	-0.456466	0.911734	-0.516511	0.0867249	0.610199	FALSE	None
AKAP11	4	-0.111069	0.0152897	4	-0.347534	0.170969	-0.23049	0.426111	0.871768	FALSE	None
AKAP12	4	-0.10802	0.13255	4	-0.081273	0.266635	-0.00742674	0.979577	0.997107	FALSE	None
AKAP13	4	-0.995868	0.391293	4	-1.134	0.0440621	-0.0191434	0.951429	0.992865	FALSE	None
AKAP14	4	-0.0162143	0.042882	4	0.682846	0.237681	0.527661	0.0752126	0.586344	FALSE	None
AKAP2	NA	NA	NA	NA	NA	NA	NA	NA	NA	NA	None
AKAP3	3	-0.0920838	0.279162	3	0.159551	0.0199882	0.186813	0.593392	0.920718	FALSE	None
AKAP4	4	0.247344	0.0331112	4	0.713887	0.099351	0.244885	0.394634	0.860909	FALSE	None
AKAP5	4	-0.146618	0.00504138	4	-0.217195	0.312782	-0.0780172	0.786596	0.96339	FALSE	None
AKAP6	4	-0.383761	0.369702	4	-0.184335	0.486312	0.188055	0.505927	0.898846	FALSE	None
AKAP7	4	0.212927	0.312146	4	0.345438	0.634474	-0.0191652	0.956693	0.993223	FALSE	None
AKAP8	4	-0.323879	0.55452	4	-0.37146	0.0719126	-0.0205024	0.949352	0.992643	FALSE	None
AKAP8L	4	-0.873245	0.204479	4	-0.868979	1.39847	0.0748982	0.811475	0.96806	FALSE	None
AKAP9	4	0.27324	0.138443	4	0.215934	0.168949	-0.197085	0.479294	0.886274	FALSE	None
AKIP1	3	-0.0195729	0.589221	3	0.546962	0.320615	0.422539	0.296476	0.811361	FALSE	None
AKIRIN1	4	-0.494864	0.0823655	4	-0.198936	0.250252	0.332498	0.284785	0.801807	FALSE	None
AKIRIN2	4	-1.20155	0.0757146	4	-0.836243	0.415032	0.480004	0.126904	0.674373	FALSE	None
AKNA	4	0.121314	0.0553446	4	0.124432	0.0403963	-0.0878962	0.756508	0.958382	FALSE	None
AKNAD1	4	-0.269451	0.075792	4	-0.575606	0.197036	-0.256272	0.383193	0.858661	FALSE	None
AKR1A1	4	-0.328521	0.172425	4	-0.193035	0.0446993	0.152518	0.614279	0.927043	FALSE	None
AKR1B1	4	-0.26235	0.336287	4	-0.549776	0.654422	-0.280994	0.317844	0.820921	FALSE	None
AKR1B10	4	-0.500672	1.3504	4	-0.0680064	0.679104	0.364953	0.241774	0.776619	FALSE	None
AKR1B15	NA	NA	NA	NA	NA	NA	NA	NA	NA	NA	None
AKR1C2	NA	NA	NA	NA	NA	NA	NA	NA	NA	NA	None
AKR1C3	4	0.40329	0.423854	4	-0.0316712	0.145959	-0.574853	0.057844	0.533887	FALSE	None
AKR1C4	NA	NA	NA	NA	NA	NA	NA	NA	NA	NA	None
AKR1D1	4	0.0345639	0.425621	4	-0.484278	1.17751	-0.581474	0.0531328	0.5211	FALSE	None
AKR1E2	4	0.134183	0.684619	4	0.452499	0.308541	0.13795	0.688476	0.946135	FALSE	None
AKR7A2	4	-0.334638	0.768447	4	0.112981	0.152429	0.388847	0.213671	0.758273	FALSE	None
AKR7A3	4	-0.638248	0.336978	4	-0.751317	0.0548113	-0.0245651	0.934759	0.991152	FALSE	None
AKT1	4	-0.732927	0.0873151	4	0.528185	0.398556	1.23495	0.000822021	0.0697487	TRUE	Positive
AKT1S1	4	-0.479837	0.806132	4	-0.38931	0.491741	0.118251	0.740553	0.956272	FALSE	None
AKT2	4	-0.793216	0.170479	4	-0.180406	0.177933	0.660369	0.0242749	0.410012	FALSE	None
AKT3	4	0.30582	0.177446	4	0.0832209	0.451126	-0.340844	0.30049	0.813669	FALSE	None
AKTIP	4	-0.595825	0.147892	4	-0.506344	0.779715	0.135151	0.658974	0.938492	FALSE	None
ALAD	4	-0.286272	0.178549	4	0.338465	0.362646	0.536278	0.0620783	0.544809	FALSE	None
ALAS1	4	-0.227755	0.309413	4	-0.235456	0.743973	-0.0397964	0.887742	0.981822	FALSE	None
ALAS2	4	0.143989	0.176587	4	0.50592	0.287175	0.188508	0.539253	0.906527	FALSE	None
ALB	4	-0.0139428	0.0888795	4	0.0895601	0.47993	0.0327213	0.915921	0.987027	FALSE	None
ALCAM	4	-0.584425	0.462211	4	-0.224775	0.084249	0.391693	0.188581	0.739215	FALSE	None
ALDH16A1	4	-0.216659	0.588006	4	0.264909	0.275044	0.389638	0.185667	0.734293	FALSE	None
ALDH18A1	4	-0.513788	0.324996	4	-0.680154	0.0218783	-0.0867337	0.774383	0.961042	FALSE	None
ALDH1A1	4	-0.35013	0.445337	4	-0.604951	0.0827498	-0.204761	0.507253	0.898846	FALSE	None
ALDH1A2	4	0.114502	0.319928	4	0.0963161	0.274156	-0.120909	0.67765	0.944473	FALSE	None
ALDH1A3	4	0.0922221	0.102975	4	0.341567	0.373307	0.106798	0.70124	0.948952	FALSE	None
ALDH1B1	4	-0.595166	0.409692	4	-1.18655	1.17702	-0.523523	0.0932597	0.61848	FALSE	None
ALDH1L1	4	-0.708536	0.494052	4	-0.865579	0.800201	-0.0999058	0.723343	0.952495	FALSE	None
ALDH1L2	4	-0.509597	0.490195	4	-0.229122	0.352041	0.297365	0.350079	0.839858	FALSE	None
ALDH2	4	-0.116977	0.228601	4	-0.383207	0.234548	-0.265816	0.352312	0.841792	FALSE	None
ALDH3A1	3	0.0706714	0.357949	3	0.229771	0.746342	0.024747	0.940255	0.991496	FALSE	None
ALDH3A2	4	0.0417114	0.533793	4	-0.401536	0.302026	-0.471548	0.117246	0.658559	FALSE	None
ALDH3B2	3	-0.52931	0.331629	3	0.413344	0.0955641	0.89488	0.013306	0.336308	TRUE	Positive
ALDH4A1	4	0.396135	0.0741849	4	0.238903	0.202614	-0.318537	0.286054	0.802212	FALSE	None
ALDH5A1	4	-0.165438	0.229091	4	-0.249741	0.189618	-0.094043	0.736991	0.955867	FALSE	None
ALDH6A1	4	-0.346601	0.517573	4	0.05491	0.617241	0.337727	0.252949	0.785642	FALSE	None
ALDH7A1	3	0.147835	0.134802	3	0.33495	0.0707586	0.0606584	0.861205	0.979146	FALSE	None
ALDH8A1	4	0.0881132	0.160192	4	0.194287	1.0899	-0.041577	0.887008	0.981794	FALSE	None
ALDH9A1	4	0.391368	0.642083	4	0.462988	0.198284	-0.189114	0.542344	0.907728	FALSE	None
ALDOA	4	-3.23533	0.447293	4	-2.92756	0.238263	0.317649	0.261154	0.788614	FALSE	None
ALDOB	4	-0.0224598	0.450634	4	0.0115046	0.274551	-0.0327522	0.916212	0.987027	FALSE	None
ALDOC	4	0.348649	0.0770638	4	0.259676	0.339964	-0.26987	0.333938	0.830542	FALSE	None
ALG1	4	-3.45596	1.41878	4	-3.73216	0.182029	-0.323357	0.301352	0.814141	FALSE	None
ALG10B	NA	NA	NA	NA	NA	NA	NA	NA	NA	NA	None
ALG11	4	-2.18868	1.15916	4	-2.66343	1.25058	-0.423448	0.152093	0.697254	FALSE	None
ALG12	4	-0.117319	0.500155	4	-0.611399	0.183639	-0.456483	0.193494	0.743737	FALSE	None
ALG13	4	-2.42552	3.91466	4	-2.12036	6.97021	0.179461	0.598566	0.923022	FALSE	None
ALG14	4	-1.93881	1.80916	4	-1.6781	1.37326	0.334837	0.23901	0.774246	FALSE	None
ALG2	4	-3.49728	0.327808	4	-2.58351	0.663019	0.931615	0.00586904	0.222725	TRUE	Positive
ALG3	4	0.102708	0.401976	4	-0.590798	0.134835	-0.700742	0.0211801	0.393672	TRUE	Negative
ALG5	3	-2.03796	1.52353	3	-2.29783	1.62616	-0.193802	0.610628	0.926018	FALSE	None
ALG6	4	-0.809435	1.46221	4	-0.869837	0.180087	0.0189834	0.96142	0.994135	FALSE	None
ALG8	4	-1.14142	1.10007	4	-1.22364	0.586764	-0.0245413	0.932365	0.990634	FALSE	None
ALG9	4	-0.191185	0.168797	4	-0.463685	0.369694	-0.257503	0.356561	0.845518	FALSE	None
ALK	4	-0.795079	3.21828	4	-0.73957	2.89059	-0.0108598	0.970944	0.996566	FALSE	None
ALKBH1	4	-0.637601	0.116988	4	-0.838198	0.379323	-0.10219	0.747704	0.957401	FALSE	None
ALKBH2	4	0.0511659	0.292753	4	-0.329807	0.411838	-0.405208	0.217808	0.76088	FALSE	None
ALKBH3	4	0.148077	0.379541	4	0.14385	0.961544	-0.141633	0.686221	0.946135	FALSE	None
ALKBH4	4	-0.278809	0.134683	4	0.00428783	0.70369	0.252165	0.421911	0.870527	FALSE	None
ALKBH5	4	-0.651743	0.0322624	4	-1.10728	0.112596	-0.337305	0.253281	0.785658	FALSE	None
ALKBH6	4	-0.204288	0.206188	4	-0.0217389	0.501363	0.140628	0.61661	0.927842	FALSE	None
ALKBH7	4	0.0989219	0.165516	4	-0.150902	0.270722	-0.303305	0.309153	0.8169	FALSE	None
ALKBH8	4	-0.954822	2.16961	4	-1.43904	1.53282	-0.466975	0.113134	0.65301	FALSE	None
ALLC	4	0.125924	0.15944	4	-0.0964756	0.0782039	-0.287519	0.316052	0.820821	FALSE	None
ALMS1	4	-0.711688	0.573803	4	-0.387495	0.179203	0.370463	0.22391	0.764301	FALSE	None
ALOX12	4	0.268057	0.34914	4	-0.0272544	0.405056	-0.390349	0.269849	0.794951	FALSE	None
ALOX12B	4	-0.104676	0.0529376	4	-0.191481	0.401093	-0.103261	0.735051	0.955409	FALSE	None
ALOX15	4	-0.229526	0.884496	4	-0.393742	0.217059	-0.17024	0.596278	0.92176	FALSE	None
ALOX15B	3	-0.321917	0.105804	3	-0.568756	0.131365	-0.192138	0.566604	0.913934	FALSE	None
ALOX5	4	-0.0487826	0.0549076	4	-0.0771431	0.723833	-0.0838753	0.779657	0.962912	FALSE	None
ALOX5AP	4	-0.145713	0.410009	4	-0.446054	0.242354	-0.284307	0.385959	0.858661	FALSE	None
ALOXE3	4	0.0101371	0.0395785	4	-0.315535	0.316076	-0.346364	0.225929	0.766267	FALSE	None
ALPI	4	0.213214	0.121779	4	-0.232393	0.171941	-0.505448	0.0838325	0.60401	FALSE	None
ALPK1	4	0.0729664	0.109884	4	0.0428694	0.0367878	-0.102174	0.725853	0.952749	FALSE	None
ALPK2	4	0.0479806	0.096015	4	-0.175051	0.329228	-0.269635	0.338433	0.831688	FALSE	None
ALPK3	4	-0.871162	0.077162	4	-0.469791	0.157943	0.500335	0.10302	0.634157	FALSE	None
ALPL	4	-0.075667	0.0486704	4	-0.00687694	0.50482	0.0213625	0.945873	0.992121	FALSE	None
ALPP	NA	NA	NA	NA	NA	NA	NA	NA	NA	NA	None
ALPPL2	NA	NA	NA	NA	NA	NA	NA	NA	NA	NA	None
ALS2	4	-0.285904	0.141148	4	0.0862295	0.0232103	0.343406	0.234229	0.772199	FALSE	None
ALS2CL	4	-0.479372	0.90727	4	-0.473422	1.67633	-0.0379479	0.899599	0.983392	FALSE	None
ALS2CR11	4	0.433333	0.122469	4	-0.294899	0.165159	-0.809701	0.00888948	0.274843	TRUE	Negative
ALS2CR12	4	-0.42974	2.13817	4	-0.884177	2.4308	-0.505313	0.0842876	0.60401	FALSE	None
ALX1	4	0.429175	0.565644	4	0.245479	0.204855	-0.392323	0.21498	0.759015	FALSE	None
ALX3	4	-0.833746	1.45562	4	-1.00062	1.74307	-0.178874	0.522226	0.903017	FALSE	None
ALX4	4	-0.655861	0.901608	4	-0.9575	1.49648	-0.270354	0.358009	0.846428	FALSE	None
ALYREF	4	-2.46875	0.377266	4	-2.52487	0.534239	-0.00406939	0.988635	0.998365	FALSE	None
AMACR	4	0.0905139	0.179502	4	-0.422362	0.445919	-0.529934	0.0925329	0.61848	FALSE	None
AMBN	4	-0.411493	0.274087	4	-0.454334	0.808643	-0.0303402	0.918024	0.987698	FALSE	None
AMBP	4	-0.704682	0.48579	4	-0.452714	0.357039	0.30107	0.336279	0.830764	FALSE	None
AMBRA1	4	0.345614	0.159322	4	0.262137	0.66488	-0.283625	0.313913	0.819465	FALSE	None
AMD1	4	-1.47835	0.901008	4	-2.20403	1.4539	-0.654287	0.0370918	0.472772	FALSE	None
AMDHD1	4	0.0589877	0.0542294	4	0.280784	0.230042	0.112823	0.700949	0.948952	FALSE	None
AMDHD2	4	-1.0727	0.373579	4	-0.702611	0.21447	0.466271	0.125484	0.670991	FALSE	None
AMELX	4	0.613025	0.0725634	4	0.360844	0.142629	-0.475824	0.116992	0.657459	FALSE	None
AMELY	4	0.340037	0.036047	4	0.409478	0.44552	-0.132021	0.642781	0.935627	FALSE	None
AMER1	4	0.0194815	0.104189	4	0.717634	0.440877	0.489557	0.0986673	0.626987	FALSE	None
AMER2	4	-0.396764	0.186447	4	-0.160859	0.228055	0.243393	0.394895	0.860909	FALSE	None
AMER3	4	-0.691201	0.204985	4	-0.595471	0.363527	0.162614	0.56484	0.912849	FALSE	None
AMFR	4	0.00258032	0.299249	4	-0.317936	0.155989	-0.334885	0.295721	0.810937	FALSE	None
AMH	4	-0.215942	0.0444872	4	-0.434821	0.174517	-0.192205	0.496769	0.895371	FALSE	None
AMHR2	4	-0.00342403	0.202556	4	-0.204664	0.449183	-0.239335	0.4298	0.871768	FALSE	None
AMICA1	4	-0.244619	0.168971	4	0.705055	0.752047	0.796857	0.0215603	0.394201	TRUE	Positive
AMIGO1	4	-0.0862578	0.14646	4	-0.334239	0.370618	-0.257551	0.363914	0.848823	FALSE	None
AMIGO2	4	-0.327145	0.530537	4	-0.514066	1.22425	-0.208149	0.469459	0.88254	FALSE	None
AMMECR1	4	0.296274	0.0379222	4	0.534567	0.107559	0.0429313	0.878792	0.980182	FALSE	None
AMMECR1L	4	-0.373362	0.186088	4	-0.279767	0.149803	0.114734	0.682212	0.945399	FALSE	None
AMN	4	-0.099165	0.133414	4	0.420324	0.0953116	0.412727	0.15555	0.699342	FALSE	None
AMN1	4	-0.43949	0.0840626	4	-0.405935	0.963346	0.0514952	0.864836	0.97935	FALSE	None
AMOT	4	0.0596715	0.95204	4	0.517896	0.179064	0.252546	0.439927	0.872525	FALSE	None
AMOTL1	4	-0.698176	1.8323	4	-0.349694	0.390949	0.34016	0.300302	0.813669	FALSE	None
AMOTL2	4	0.307701	0.0327391	4	0.0450066	0.333304	-0.374347	0.214789	0.759015	FALSE	None
AMPD1	4	-0.276744	0.162637	4	0.0201306	0.305345	0.270715	0.367896	0.851859	FALSE	None
AMPD2	4	-0.180189	0.412163	4	0.115111	0.318576	0.223778	0.456193	0.878783	FALSE	None
AMPD3	4	-0.160245	0.0836834	4	-0.011948	0.101864	0.117532	0.688038	0.946135	FALSE	None
AMPH	4	-0.037449	0.150819	4	0.117281	0.223443	0.0818956	0.785128	0.96339	FALSE	None
AMT	4	-0.265786	0.0716524	4	-0.333747	0.210406	-0.0448221	0.879514	0.980407	FALSE	None
AMTN	4	-0.638653	0.217354	4	-0.0695462	1.01154	0.574597	0.0836016	0.60401	FALSE	None
AMZ1	4	0.294585	0.627323	4	-0.143466	0.0774694	-0.516982	0.146307	0.693963	FALSE	None
AMZ2	4	-0.100906	0.103229	4	-0.482484	0.258734	-0.363711	0.221695	0.763876	FALSE	None
ANAPC1	4	-1.68661	1.55195	4	-1.63153	1.95322	0.0746684	0.80063	0.965832	FALSE	None
ANAPC10	4	-1.66225	0.57207	4	-2.11984	0.404291	-0.368981	0.22494	0.765044	FALSE	None
ANAPC11	4	-3.59532	0.327045	4	-3.84239	0.0140649	-0.310624	0.293738	0.808988	FALSE	None
ANAPC13	4	-2.1989	0.204165	4	-2.24435	0.467843	0.0333981	0.916001	0.987027	FALSE	None
ANAPC15	4	-1.76599	3.85063	4	-2.01673	2.77219	-0.261491	0.513925	0.901256	FALSE	None
ANAPC16	4	-0.071661	0.116772	4	-0.267061	0.271662	-0.20647	0.500638	0.897964	FALSE	None
ANAPC2	4	-2.3477	0.242927	4	-2.32158	0.259041	0.0903272	0.743801	0.956272	FALSE	None
ANAPC4	4	-1.50406	0.367231	4	-2.66403	0.087233	-1.0768	0.00275152	0.145632	TRUE	Negative
ANAPC5	4	-1.44573	1.17149	4	-2.1894	0.741639	-0.65472	0.0501048	0.511907	FALSE	None
ANAPC7	4	-0.0136907	0.0580746	4	0.553531	0.568535	0.398409	0.168787	0.715804	FALSE	None
ANG	4	-0.304698	0.0374924	4	-0.396344	0.421661	-0.0629368	0.825977	0.971308	FALSE	None
ANGEL1	4	-0.277777	0.0953114	4	-0.424243	0.0642744	-0.110837	0.696339	0.947548	FALSE	None
ANGEL2	4	0.0968345	0.355942	4	0.892293	1.27727	0.460768	0.15483	0.699342	FALSE	None
ANGPT1	3	0.288773	0.265905	3	0.0517431	0.491228	-0.341099	0.38889	0.858962	FALSE	None
ANGPT2	4	0.340871	0.383372	4	0.00115511	0.844831	-0.503591	0.0987835	0.627188	FALSE	None
ANGPT4	4	-0.170625	0.396715	4	-0.49601	0.258367	-0.318164	0.283627	0.801274	FALSE	None
ANGPTL1	4	-0.206958	0.677483	4	-0.0213352	0.199405	0.13124	0.659366	0.938492	FALSE	None
ANGPTL2	4	0.0306855	0.235641	4	0.228753	0.0280201	0.0986162	0.734487	0.955241	FALSE	None
ANGPTL3	4	0.197887	0.316783	4	-0.549791	0.212969	-0.770771	0.0130182	0.334285	TRUE	Negative
ANGPTL4	4	-0.312626	0.119354	4	0.0172135	0.023885	0.314207	0.275715	0.798328	FALSE	None
ANGPTL5	4	0.271505	0.135349	4	-0.0648955	0.0224991	-0.425154	0.143247	0.690193	FALSE	None
ANGPTL6	4	-0.0203721	0.92708	4	-0.230486	1.98045	-0.370764	0.236861	0.773263	FALSE	None
ANGPTL7	4	0.0967901	0.0945498	4	-0.135333	0.224912	-0.285803	0.324362	0.824551	FALSE	None
ANHX	4	-0.249775	0.220068	4	-0.310292	0.175306	-0.0535626	0.848964	0.976794	FALSE	None
ANK1	4	-0.143356	0.187527	4	0.111345	0.480657	0.190012	0.521361	0.902897	FALSE	None
ANK2	4	-0.608406	0.53629	4	-0.589424	0.161665	0.0886226	0.783368	0.96339	FALSE	None
ANK3	4	-0.00769676	0.414882	4	-0.166981	0.872074	-0.233101	0.438784	0.872525	FALSE	None
ANKAR	4	-0.213323	0.20287	4	0.167005	0.141866	0.325042	0.268169	0.794304	FALSE	None
ANKDD1A	4	-0.450383	0.600184	4	-0.801625	0.79099	-0.319791	0.26523	0.79185	FALSE	None
ANKDD1B	4	-0.331212	0.156775	4	-0.784606	0.858154	-0.408739	0.203004	0.751174	FALSE	None
ANKEF1	4	-0.0345688	0.107766	4	0.0817033	0.346479	0.0459271	0.87365	0.97935	FALSE	None
ANKFN1	4	-0.317693	0.281899	4	-0.802342	0.390183	-0.434667	0.143692	0.690193	FALSE	None
ANKFY1	4	-0.451909	0.112347	4	-0.810539	0.359708	-0.282329	0.347557	0.838707	FALSE	None
ANKH	4	-0.326279	0.966909	4	-0.506803	0.0884909	-0.140829	0.696089	0.947548	FALSE	None
ANKHD1	NA	NA	NA	NA	NA	NA	NA	NA	NA	NA	None
ANKHD1-EIF4EBP3	4	0.168946	0.385503	4	-0.138885	0.0113074	-0.369747	0.238026	0.773438	FALSE	None
ANKIB1	4	0.245958	0.068772	4	0.0517599	0.0377067	-0.295291	0.298794	0.813071	FALSE	None
ANKK1	4	-0.28412	0.0981906	4	-0.195572	0.609719	0.0812653	0.776856	0.961869	FALSE	None
ANKLE1	4	-0.15055	0.0600215	4	0.0443337	0.0533915	0.154488	0.593392	0.920718	FALSE	None
ANKLE2	4	-2.61705	2.45815	4	-2.5284	3.87673	0.100942	0.73167	0.954059	FALSE	None
ANKMY1	4	-0.146305	0.109709	4	0.379927	0.339644	0.431137	0.169644	0.716948	FALSE	None
ANKMY2	4	-0.287941	0.179296	4	-0.0238186	0.40749	0.23562	0.404192	0.862628	FALSE	None
ANKRA2	4	-0.00976025	0.112743	4	0.0456391	0.198241	-0.00763897	0.979094	0.997107	FALSE	None
ANKRD1	4	-0.01333	0.00854145	4	-0.0600134	0.0795011	-0.0917318	0.744062	0.956272	FALSE	None
ANKRD10	4	0.170524	0.0157134	4	0.174511	0.070007	-0.100802	0.721746	0.952495	FALSE	None
ANKRD11	4	-0.00277544	0.220959	4	-0.0558584	0.677886	-0.108679	0.742897	0.956272	FALSE	None
ANKRD12	4	0.322808	0.149839	4	-0.268447	0.220709	-0.655779	0.0416755	0.489711	FALSE	None
ANKRD13A	4	-0.490559	0.0552817	4	-0.422828	0.141805	0.130102	0.659001	0.938492	FALSE	None
ANKRD13B	4	-0.211212	0.0371095	4	0.0137709	0.135796	0.19762	0.482571	0.888306	FALSE	None
ANKRD13C	4	0.414729	0.0530518	4	0.0933566	0.18221	-0.455426	0.132749	0.680166	FALSE	None
ANKRD13D	4	-0.197449	0.725791	4	-0.404691	1.37328	-0.269952	0.341962	0.834353	FALSE	None
ANKRD16	4	0.12743	0.112003	4	-0.102859	0.269804	-0.294596	0.31343	0.819336	FALSE	None
ANKRD17	4	-1.04495	0.874506	4	-1.6327	0.207808	-0.482806	0.147322	0.694835	FALSE	None
ANKRD18A	NA	NA	NA	NA	NA	NA	NA	NA	NA	NA	None
ANKRD18B	NA	NA	NA	NA	NA	NA	NA	NA	NA	NA	None
ANKRD2	4	0.0633567	0.254363	4	-0.0343846	0.0404935	-0.158978	0.600575	0.923389	FALSE	None
ANKRD22	4	0.277495	0.427248	4	0.349801	0.280581	-0.125485	0.665338	0.939993	FALSE	None
ANKRD23	4	-0.334491	0.15621	4	-0.627864	0.361549	-0.251308	0.388276	0.858661	FALSE	None
ANKRD24	4	-0.275647	0.1177	4	-0.610428	0.280428	-0.280088	0.366419	0.850447	FALSE	None
ANKRD26	4	-0.124337	0.277261	4	0.0303091	0.634275	0.103249	0.757127	0.958382	FALSE	None
ANKRD27	4	-0.370515	0.223502	4	0.315742	0.0958089	0.636872	0.0417193	0.489711	FALSE	None
ANKRD28	4	-0.632243	0.510996	4	-0.503746	0.446989	0.167167	0.58191	0.917607	FALSE	None
ANKRD29	4	0.00756516	0.0374306	4	-0.0723472	0.54816	-0.127659	0.68877	0.946234	FALSE	None
ANKRD30A	3	-0.0619016	0.26045	3	0.0502408	0.00786197	0.0593839	0.864094	0.97935	FALSE	None
ANKRD30B	4	-0.156072	0.0672216	4	-0.430121	0.104472	-0.248062	0.403769	0.86233	FALSE	None
ANKRD30BL	NA	NA	NA	NA	NA	NA	NA	NA	NA	NA	None
ANKRD31	4	-0.338507	0.263281	4	0.0174258	0.191878	0.336626	0.256507	0.786151	FALSE	None
ANKRD32	4	0.342369	0.206744	4	0.0150289	0.278466	-0.44127	0.172096	0.720309	FALSE	None
ANKRD33	4	-0.142342	0.249981	4	0.108618	0.423357	0.190542	0.536891	0.905674	FALSE	None
ANKRD33B	4	0.318662	0.0685489	4	0.170427	0.0607222	-0.280807	0.324248	0.824551	FALSE	None
ANKRD34A	4	-0.209891	0.990255	4	-0.103402	0.513975	0.0510418	0.879161	0.980294	FALSE	None
ANKRD34B	4	0.0665518	0.197045	4	-0.0733984	0.416731	-0.206847	0.484092	0.888532	FALSE	None
ANKRD34C	3	-0.693797	0.406363	3	-1.0314	0.574317	-0.262562	0.429665	0.871768	FALSE	None
ANKRD35	4	-0.542406	0.395694	4	-0.242934	0.585495	0.301809	0.2846	0.801807	FALSE	None
ANKRD36	NA	NA	NA	NA	NA	NA	NA	NA	NA	NA	None
ANKRD36C	4	-0.600755	0.624329	4	-0.526141	0.653785	0.0938324	0.745028	0.956272	FALSE	None
ANKRD37	4	0.209137	0.280033	4	0.448355	0.0513473	0.063487	0.829149	0.972227	FALSE	None
ANKRD39	4	-0.0354993	0.363302	4	0.364151	0.432631	0.272901	0.397094	0.860909	FALSE	None
ANKRD40	4	-0.213259	0.0910669	4	0.178158	0.205046	0.33957	0.247463	0.781998	FALSE	None
ANKRD42	4	0.527402	0.550356	4	-0.070546	0.626591	-0.783488	0.0133533	0.336308	TRUE	Negative
ANKRD44	4	-0.0490605	0.0972039	4	0.140297	1.0221	0.0933957	0.769137	0.960132	FALSE	None
ANKRD45	4	0.236332	0.0810797	4	0.204634	0.173793	-0.151911	0.616536	0.927841	FALSE	None
ANKRD46	4	-0.447292	0.0800491	4	-0.500627	0.449671	-0.00632923	0.982597	0.997645	FALSE	None
ANKRD49	4	-2.37788	0.134682	4	-2.6462	1.39887	-0.213728	0.51603	0.901487	FALSE	None
ANKRD50	4	-0.400712	0.723007	4	-0.548566	0.201912	-0.116255	0.717165	0.951094	FALSE	None
ANKRD52	4	-0.523288	0.0044232	4	-0.364883	0.234874	0.213136	0.457059	0.878783	FALSE	None
ANKRD53	4	-0.329251	0.00509275	4	-0.207272	0.171895	0.136648	0.626877	0.930331	FALSE	None
ANKRD54	4	-0.401626	0.404745	4	-0.762892	1.00471	-0.329888	0.289102	0.806201	FALSE	None
ANKRD55	4	-0.313035	0.416409	4	-0.405347	0.143008	-0.0588372	0.851897	0.977458	FALSE	None
ANKRD6	4	0.104208	0.142774	4	-0.144348	0.40217	-0.308115	0.30018	0.813669	FALSE	None
ANKRD61	4	0.0076412	0.0791293	4	0.610382	0.262269	0.446211	0.148061	0.694835	FALSE	None
ANKRD62	4	0.151234	0.031418	4	-0.362947	0.0444833	-0.539556	0.0614143	0.543026	FALSE	None
ANKRD63	4	-0.389071	0.0521683	4	-0.509877	0.562901	-0.0682763	0.828499	0.97215	FALSE	None
ANKRD65	4	0.0458727	0.106815	4	-0.299281	0.260409	-0.371407	0.199936	0.747597	FALSE	None
ANKRD66	4	-0.500828	0.170188	4	-0.273422	0.150503	0.27707	0.383124	0.858661	FALSE	None
ANKRD7	4	-0.188839	0.0618873	4	-0.332772	0.329189	-0.132886	0.65483	0.93774	FALSE	None
ANKRD9	4	0.133789	0.0984462	4	0.2957	0.0599006	0.0365092	0.895766	0.982951	FALSE	None
ANKS1A	4	-0.0656267	0.0507476	4	-0.137744	0.531358	-0.111058	0.699113	0.948434	FALSE	None
ANKS1B	4	-1.02376	2.19047	4	-0.858262	1.80685	0.177729	0.533056	0.905396	FALSE	None
ANKS3	4	0.173438	0.771546	4	-0.380225	0.436831	-0.631102	0.0496789	0.510568	FALSE	None
ANKS4B	4	-0.0280008	0.704083	4	-0.29658	0.676028	-0.337246	0.237536	0.773322	FALSE	None
ANKS6	4	-0.307417	0.614223	4	-0.545446	0.649297	-0.224938	0.490139	0.892887	FALSE	None
ANKUB1	4	-0.600756	0.276134	4	-0.419906	0.127437	0.244578	0.420173	0.869556	FALSE	None
ANKZF1	4	-0.307509	0.926236	4	-0.00438778	0.616862	0.244463	0.460396	0.879819	FALSE	None
ANLN	3	-0.928639	0.045671	3	-0.995348	0.445513	0.0480823	0.891896	0.982835	FALSE	None
ANO1	4	0.0752701	0.317906	4	-0.0850238	0.200998	-0.223641	0.453171	0.878027	FALSE	None
ANO10	4	-0.0854525	0.192167	4	0.0675792	0.630445	0.0705604	0.810954	0.967843	FALSE	None
ANO2	4	0.128443	0.929505	4	-0.487248	0.556823	-0.689775	0.0240569	0.408327	FALSE	None
ANO3	4	0.0441195	0.114467	4	-0.226046	0.158392	-0.304407	0.283679	0.801274	FALSE	None
ANO4	4	-0.0992348	0.281078	4	-0.0460928	0.174394	0.00958856	0.97402	0.996635	FALSE	None
ANO5	3	-0.0249432	1.34457	3	-0.203375	0.457694	-0.268301	0.471326	0.882907	FALSE	None
ANO6	4	0.42065	0.0450422	4	0.0769007	0.0443537	-0.47267	0.109565	0.6443	FALSE	None
ANO7	4	0.209192	0.014306	4	0.275545	0.635784	-0.0856576	0.769461	0.960132	FALSE	None
ANO8	4	-0.333869	0.331163	4	-0.227481	0.101339	0.110538	0.701655	0.948952	FALSE	None
ANO9	4	-0.814846	0.972964	4	-0.369077	0.598191	0.477791	0.164827	0.70906	FALSE	None
ANP32A	4	-0.171822	0.0744614	4	-0.584253	0.137016	-0.369682	0.211086	0.757442	FALSE	None
ANP32B	4	-0.922514	0.842837	4	-1.65911	1.02571	-0.654419	0.0306691	0.439015	FALSE	None
ANP32D	NA	NA	NA	NA	NA	NA	NA	NA	NA	NA	None
ANP32E	4	-0.0755879	0.454581	4	0.207571	0.527762	0.172689	0.552671	0.908906	FALSE	None
ANPEP	4	-0.15175	0.375446	4	-0.355516	0.76716	-0.230717	0.437547	0.872433	FALSE	None
ANTXR1	4	0.424019	0.0719429	4	0.0166217	0.575234	-0.553158	0.0688823	0.570465	FALSE	None
ANTXR2	4	0.235682	0.208882	4	-0.0199906	0.106726	-0.342817	0.266791	0.792765	FALSE	None
ANTXRL	4	0.199834	0.0298127	4	-0.248134	0.163987	-0.496958	0.0875771	0.612458	FALSE	None
ANXA1	4	0.0329954	0.1347	4	-0.340192	0.20548	-0.387272	0.210891	0.757442	FALSE	None
ANXA10	4	0.228781	0.0365451	4	0.918537	0.453531	0.394624	0.179133	0.727568	FALSE	None
ANXA11	4	-0.372645	0.262008	4	-0.251973	1.26104	0.0857862	0.767315	0.959934	FALSE	None
ANXA13	4	0.266453	0.233893	4	0.262097	0.409037	-0.182281	0.523538	0.903017	FALSE	None
ANXA2	4	-0.652762	1.05837	4	-0.340907	0.235075	0.330383	0.316007	0.820821	FALSE	None
ANXA2R	4	-0.410326	0.273527	4	-0.31866	0.168626	0.130417	0.682712	0.945602	FALSE	None
ANXA3	4	-0.152252	0.541966	4	-0.202922	0.718647	-0.105815	0.728335	0.952749	FALSE	None
ANXA4	4	0.224469	0.109129	4	-0.0158197	0.325372	-0.336638	0.258488	0.78769	FALSE	None
ANXA5	4	0.251277	0.124082	4	0.0839755	0.354444	-0.29046	0.333457	0.830403	FALSE	None
ANXA6	4	-0.0539312	0.0406717	4	-0.174849	0.131988	-0.144368	0.619592	0.928473	FALSE	None
ANXA7	4	-0.403613	0.427577	4	-0.343747	0.230951	0.0802851	0.78163	0.96339	FALSE	None
ANXA9	4	-0.171228	0.632565	4	-0.476757	1.67001	-0.364516	0.213279	0.758029	FALSE	None
AOAH	4	-0.60543	0.119852	4	0.0379525	0.248781	0.658174	0.028514	0.433934	FALSE	None
AOC1	4	-0.158114	0.216896	4	-0.0193372	0.92733	0.0767183	0.801411	0.965849	FALSE	None
AOC2	4	0.221565	0.137913	4	-0.192696	0.120645	-0.473948	0.115757	0.656013	FALSE	None
AOC3	4	-0.578592	0.688493	4	-0.193255	0.649581	0.373936	0.202812	0.751043	FALSE	None
AOX1	4	-0.0344137	0.147002	4	0.0666522	0.323614	0.0408831	0.896859	0.98296	FALSE	None
AP001816.1	4	-0.166281	0.537505	4	-0.0394272	0.121926	0.0992034	0.775489	0.961204	FALSE	None
AP003774.4	4	0.0552758	0.125114	4	-0.290714	0.23859	-0.371957	0.205052	0.753693	FALSE	None
AP1AR	4	-0.384528	0.608751	4	0.181158	0.469489	0.488751	0.106032	0.639075	FALSE	None
AP1B1	3	-0.274985	0.0384206	3	-0.218255	0.0991915	0.0705487	0.834615	0.973449	FALSE	None
AP1G1	4	-0.283867	0.356882	4	0.264698	0.261939	0.483331	0.13162	0.678712	FALSE	None
AP1G2	4	-0.777054	2.28365	4	-1.18678	1.10044	-0.368795	0.229544	0.767261	FALSE	None
AP1M1	4	-0.682345	0.0438816	4	-0.0111616	0.234928	0.699736	0.0191463	0.385377	TRUE	Positive
AP1M2	4	-0.0109336	0.339866	4	-0.380486	0.578362	-0.407523	0.151112	0.696516	FALSE	None
AP1S1	4	0.233726	0.116236	4	-0.118725	0.162462	-0.424285	0.170951	0.718771	FALSE	None
AP1S2	4	0.0825446	0.135285	4	0.472802	1.14545	0.193168	0.550306	0.908449	FALSE	None
AP1S3	4	-0.0246884	0.83245	4	-0.120855	0.883673	-0.198045	0.522401	0.903017	FALSE	None
AP2A1	4	-0.258942	0.0798009	4	-0.746123	0.199272	-0.429971	0.131705	0.678712	FALSE	None
AP2A2	4	0.0556821	0.0973189	4	-0.834668	0.396521	-0.855021	0.00725015	0.249201	TRUE	Negative
AP2B1	4	-0.362946	0.0584684	4	-0.823763	0.401891	-0.380006	0.232059	0.770206	FALSE	None
AP2M1	4	-1.48243	1.62847	4	-2.11493	2.39125	-0.607372	0.0745172	0.584295	FALSE	None
AP2S1	4	-2.93306	1.12232	4	-3.22034	0.509647	-0.293941	0.35296	0.842537	FALSE	None
AP3B1	4	-0.2857	0.156504	4	0.594478	0.00455528	0.776848	0.0126189	0.328841	TRUE	Positive
AP3B2	4	-0.0734957	0.108624	4	-0.470875	0.41906	-0.381788	0.237487	0.773309	FALSE	None
AP3D1	4	-0.734198	0.0214513	4	-0.469609	0.120551	0.352841	0.220949	0.763425	FALSE	None
AP3M1	4	-0.273733	0.0393823	4	-0.017113	0.289535	0.238052	0.403591	0.862222	FALSE	None
AP3M2	4	-0.420065	0.199596	4	-0.427867	0.115165	0.0415695	0.888765	0.982133	FALSE	None
AP3S1	4	-0.895704	1.3094	4	-0.541582	0.326775	0.396161	0.20296	0.751174	FALSE	None
AP3S2	3	0.356209	0.523581	3	-0.141824	0.176182	-0.611471	0.0838734	0.60401	FALSE	None
AP4B1	4	-0.0538029	0.332168	4	-0.693513	0.265787	-0.621576	0.0375374	0.475216	FALSE	None
AP4E1	4	0.322859	0.015061	4	0.122408	0.11342	-0.324795	0.255774	0.786151	FALSE	None
AP4M1	4	-0.272168	0.483433	4	-0.325573	0.763301	-0.0830023	0.766646	0.959809	FALSE	None
AP4S1	4	0.0698107	0.672751	4	-0.702823	0.155304	-0.74826	0.0424691	0.490633	FALSE	None
AP5B1	4	-0.126327	0.526298	4	-0.443525	0.25504	-0.317762	0.302963	0.815891	FALSE	None
AP5M1	4	-0.0024209	0.0344302	4	-0.071821	0.112652	-0.113877	0.688198	0.946135	FALSE	None
AP5S1	4	-0.089035	0.930082	4	-0.510826	1.84528	-0.51491	0.0765002	0.58907	FALSE	None
AP5Z1	4	-0.232318	0.37188	4	-0.639562	0.524937	-0.382802	0.223782	0.764301	FALSE	None
APAF1	4	-0.187652	0.480427	4	-0.372055	0.161637	-0.187208	0.517772	0.902135	FALSE	None
APBA1	4	-0.0638559	0.409942	4	-0.0836932	0.114903	-0.0599917	0.849481	0.976794	FALSE	None
APBA2	4	-0.199845	0.358513	4	0.0987014	0.460718	0.23983	0.433908	0.871768	FALSE	None
APBA3	4	-0.422085	0.492072	4	-1.03532	0.218392	-0.542291	0.0746468	0.58446	FALSE	None
APBB1	4	-0.498735	0.518941	4	-0.502973	1.98624	-0.0270071	0.932304	0.990634	FALSE	None
APBB1IP	4	0.163875	0.0953156	4	-0.0756631	0.43757	-0.326576	0.248018	0.782116	FALSE	None
APBB2	4	0.113228	0.359366	4	0.411432	1.34434	0.0768936	0.802379	0.966139	FALSE	None
APBB3	4	0.127525	0.109998	4	-0.159779	0.203788	-0.340721	0.261891	0.789001	FALSE	None
APC	4	-0.146828	0.195143	4	-0.878623	0.22066	-0.679722	0.0240899	0.408412	FALSE	None
APC2	4	-0.66008	0.19124	4	0.0965668	0.164077	0.767896	0.0125787	0.328841	TRUE	Positive
APCDD1	4	0.0703231	0.103784	4	0.0773881	0.142782	-0.0758565	0.78363	0.96339	FALSE	None
APCDD1L	4	0.147055	0.00669819	4	-0.300981	0.659285	-0.488512	0.121273	0.666291	FALSE	None
APCS	4	-0.153369	0.0637522	4	0.0354009	0.253632	0.147647	0.617846	0.927842	FALSE	None
APEH	4	-0.185025	0.391789	4	0.146616	0.0557365	0.279446	0.388863	0.858962	FALSE	None
APEX1	4	-3.11898	0.139783	4	-2.9586	0.212765	0.171432	0.539206	0.906527	FALSE	None
APEX2	4	-2.77718	0.481663	4	-0.73229	0.843891	2.14206	3.13984e-07	0.000290253	TRUE	Positive
APH1A	4	-0.0703326	0.295247	4	0.460721	0.124754	0.394188	0.178204	0.727225	FALSE	None
APH1B	4	-0.832014	0.0587095	4	-0.300714	0.596205	0.599897	0.0617785	0.543857	FALSE	None
API5	4	-1.18134	0.549169	4	-0.819046	0.517873	0.448122	0.136039	0.683977	FALSE	None
APIP	4	-0.209107	0.924143	4	0.0725131	1.23479	0.158273	0.608381	0.926018	FALSE	None
APLF	4	0.0111743	0.230898	4	0.257864	0.650998	0.14418	0.677493	0.944378	FALSE	None
APLN	4	0.0155331	0.531609	4	0.598168	1.36373	0.315839	0.279646	0.799767	FALSE	None
APLNR	4	-0.715395	0.638087	4	-0.0369887	0.86946	0.679014	0.0575294	0.533217	FALSE	None
APLP1	4	-0.266664	0.180794	4	-0.309026	0.0259525	-0.022975	0.935775	0.991165	FALSE	None
APLP2	4	-0.0785783	0.339481	4	0.0226118	0.611765	0.0346522	0.912799	0.986389	FALSE	None
APMAP	4	0.308359	0.160531	4	0.236552	0.273929	-0.21873	0.46985	0.88254	FALSE	None
APOA1	4	0.409469	0.0761152	4	0.387404	0.182785	-0.214331	0.465305	0.881957	FALSE	None
APOA1BP	4	-0.110273	0.68386	4	-0.238981	0.439897	-0.176603	0.550819	0.908449	FALSE	None
APOA2	4	-0.381051	0.18185	4	0.0195582	0.0489522	0.39039	0.173568	0.722236	FALSE	None
APOA4	3	-0.385397	0.040887	3	-0.182244	0.370513	0.220316	0.515855	0.901487	FALSE	None
APOA5	4	-0.062319	0.0612008	4	0.141335	0.128385	0.138197	0.637199	0.932923	FALSE	None
APOB	4	0.648643	0.161635	4	0.465706	1.05801	-0.516978	0.102617	0.63367	FALSE	None
APOBEC1	4	0.0428235	0.423773	4	-0.304938	0.262201	-0.392115	0.172518	0.721282	FALSE	None
APOBEC2	4	-0.0958414	0.359926	4	0.0675976	0.71698	0.0639896	0.821424	0.969916	FALSE	None
APOBEC3A	4	0.157798	0.0591635	4	0.0564246	0.0314826	-0.186272	0.515105	0.901256	FALSE	None
APOBEC3B	4	0.255291	0.0487314	4	0.379929	0.838142	-0.0685483	0.823448	0.970624	FALSE	None
APOBEC3C	4	0.0287449	0.174536	4	-0.254645	0.21214	-0.317128	0.265949	0.79185	FALSE	None
APOBEC3D	4	0.0964807	0.0332548	4	0.431734	0.258346	0.183599	0.514869	0.901256	FALSE	None
APOBEC3F	4	0.508542	0.0851517	4	0.216759	0.086975	-0.464024	0.12389	0.667918	FALSE	None
APOBEC3G	4	-0.108368	0.412932	4	0.165709	0.147996	0.196084	0.498135	0.896723	FALSE	None
APOBEC3H	4	-0.0101535	0.278536	4	-0.202467	0.0687681	-0.223813	0.442824	0.874276	FALSE	None
APOBEC4	4	-0.573038	0.2765	4	-0.481166	0.0386282	0.160108	0.589907	0.919517	FALSE	None
APOBR	3	-0.0276811	0.137417	3	-0.300968	0.701495	-0.304187	0.364762	0.848837	FALSE	None
APOC1	4	-0.269721	0.299326	4	-0.185889	0.236885	0.0832207	0.784515	0.96339	FALSE	None
APOC3	4	-0.0600377	0.0925265	4	0.280159	0.196955	0.249115	0.404437	0.862628	FALSE	None
APOC4	4	0.255981	0.381025	4	0.140799	0.0847337	-0.230678	0.487122	0.890548	FALSE	None
APOD	4	-0.115088	0.155641	4	0.130724	0.114149	0.186288	0.522907	0.903017	FALSE	None
APOE	4	0.0362413	0.0996408	4	-0.179331	0.140969	-0.250658	0.404547	0.862628	FALSE	None
APOF	4	-0.451681	0.68106	4	-0.912071	0.294751	-0.403026	0.170976	0.718771	FALSE	None
APOH	4	0.0529132	0.109174	4	-0.0508833	0.238385	-0.165071	0.558777	0.910481	FALSE	None
APOL1	4	0.0630984	0.0465025	4	-0.0925138	0.305847	-0.206517	0.494739	0.894143	FALSE	None
APOL2	4	-0.229594	0.0956052	4	0.106495	0.656605	0.273625	0.342996	0.835488	FALSE	None
APOL3	4	-0.0268309	2.47789	4	-1.13715	3.11328	-1.18943	0.00228343	0.133074	TRUE	Negative
APOL4	NA	NA	NA	NA	NA	NA	NA	NA	NA	NA	None
APOL5	4	0.340791	0.204825	4	-0.223805	0.320362	-0.641821	0.0489195	0.510079	FALSE	None
APOL6	4	0.0848214	0.103715	4	-0.530445	0.237988	-0.61152	0.0470148	0.50209	FALSE	None
APOLD1	4	-1.01694	0.407603	4	-0.594368	0.838857	0.472708	0.102274	0.633255	FALSE	None
APOM	4	-0.186098	0.509324	4	0.0828148	0.0597221	0.22086	0.492421	0.893388	FALSE	None
APOO	4	0.27335	0.272383	4	0.415927	0.215089	-0.0505056	0.862621	0.97935	FALSE	None
APOOL	4	0.0289191	0.146238	4	0.96806	0.183437	0.708383	0.0297625	0.437506	FALSE	None
APOPT1	NA	NA	NA	NA	NA	NA	NA	NA	NA	NA	None
APP	4	0.010129	0.13029	4	0.145071	0.0287942	0.0555152	0.845595	0.975967	FALSE	None
APPBP2	4	-0.311939	0.0288666	4	-0.452921	0.297265	-0.10185	0.716886	0.951094	FALSE	None
APPL1	4	-0.536179	0.34987	4	-0.388908	1.22211	0.159835	0.629784	0.931341	FALSE	None
APPL2	4	0.380127	0.503228	4	-0.311066	1.4879	-0.850422	0.00727219	0.24947	TRUE	Negative
APRT	4	-0.334617	0.278415	4	-0.326459	0.153445	0.0346379	0.907763	0.985488	FALSE	None
APTX	4	-0.61695	1.49277	4	-0.674601	2.23916	-0.089209	0.757364	0.958382	FALSE	None
AQP1	4	-0.505249	1.44703	4	-0.913669	1.55488	-0.416508	0.158449	0.702422	FALSE	None
AQP10	4	-0.625826	0.163895	4	0.0132273	0.897844	0.632568	0.0538288	0.5211	FALSE	None
AQP11	4	0.0113283	0.299818	4	0.315733	0.0583199	0.197742	0.525211	0.90329	FALSE	None
AQP2	4	-0.309433	0.505368	4	-0.395334	0.229817	-0.0818529	0.775903	0.961204	FALSE	None
AQP3	4	-0.562975	0.755795	4	-0.515615	0.0546965	0.098094	0.761234	0.958844	FALSE	None
AQP4	4	0.0245822	0.401388	4	-0.544487	1.17769	-0.616977	0.0434861	0.493724	FALSE	None
AQP5	4	-0.687593	0.571671	4	-0.518846	0.71025	0.205882	0.499613	0.897443	FALSE	None
AQP6	4	0.0917709	0.33431	4	0.0730096	0.426774	-0.139985	0.627139	0.93059	FALSE	None
AQP8	4	-0.133694	0.373557	4	0.487797	0.140129	0.496532	0.122876	0.667171	FALSE	None
AQP9	4	-0.102446	0.270408	4	-0.200667	0.13657	-0.123072	0.661494	0.938973	FALSE	None
AQPEP	4	-0.875427	1.42351	4	-0.603471	1.09875	0.285969	0.312489	0.818455	FALSE	None
AQR	4	-3.05634	1.23972	4	-3.06983	0.733763	-0.0229035	0.93527	0.991165	FALSE	None
AR	4	-0.124329	0.106671	4	0.685195	0.435426	0.634568	0.0320218	0.444961	FALSE	None
ARAF	4	0.028702	0.237729	4	0.311271	0.215044	0.173686	0.584693	0.91834	FALSE	None
ARAP1	4	-0.13223	0.339977	4	-0.589186	0.145996	-0.432457	0.156872	0.699342	FALSE	None
ARAP2	4	0.0971138	0.0420282	4	-0.0749897	0.882156	-0.248801	0.433202	0.871768	FALSE	None
ARAP3	4	0.332238	0.0427245	4	0.469209	0.108453	-0.0540706	0.84746	0.976692	FALSE	None
ARC	4	-0.247895	0.232783	4	-0.152483	0.0715694	0.0946619	0.757718	0.958528	FALSE	None
ARCN1	4	-1.78395	1.47636	4	-1.40987	1.22446	0.463352	0.164136	0.708278	FALSE	None
AREL1	4	-0.375889	0.158636	4	-0.564075	0.954888	-0.16553	0.59745	0.922197	FALSE	None
ARF1	4	-1.56358	0.67354	4	-1.29162	0.530603	0.381171	0.288574	0.805677	FALSE	None
ARF3	4	-0.534149	0.399191	4	-0.764553	0.253078	-0.155427	0.61961	0.928473	FALSE	None
ARF4	4	-0.607754	0.183866	4	-0.997629	1.18748	-0.30721	0.390606	0.859195	FALSE	None
ARF5	4	-0.455247	0.282188	4	-0.374632	0.202702	0.110866	0.692314	0.947351	FALSE	None
ARF6	4	0.00984066	0.0390979	4	-0.350567	0.360966	-0.368833	0.232591	0.770414	FALSE	None
ARFGAP1	4	-0.00691844	0.290119	4	-0.0177836	0.240704	-0.0752873	0.792275	0.963931	FALSE	None
ARFGAP2	4	-0.740066	0.299039	4	-0.39658	1.27614	0.360519	0.228505	0.766905	FALSE	None
ARFGAP3	4	-0.133316	0.434043	4	0.462868	0.0358578	0.486235	0.140829	0.689903	FALSE	None
ARFGEF1	4	-0.426403	0.205629	4	-0.517138	0.164344	-0.0253201	0.936102	0.991167	FALSE	None
ARFGEF2	4	-0.0310613	0.118788	4	-0.0188868	0.382842	-0.0543814	0.844504	0.975967	FALSE	None
ARFIP1	4	-0.123538	0.0597351	4	-0.555054	0.0333155	-0.394816	0.17505	0.723979	FALSE	None
ARFIP2	4	-0.0684266	0.156947	4	-0.113055	0.0461915	-0.0746772	0.792308	0.963931	FALSE	None
ARFRP1	4	-1.24288	0.443755	4	-0.888617	2.16608	0.422527	0.200559	0.748295	FALSE	None
ARG1	3	0.0782067	0.208051	3	-0.226275	0.350795	-0.344229	0.334941	0.830675	FALSE	None
ARG2	4	0.174212	0.0987178	4	0.294608	0.215761	-0.00965117	0.974405	0.996635	FALSE	None
ARGFX	4	-0.897561	0.142206	4	-0.709222	1.54413	0.242232	0.474515	0.88444	FALSE	None
ARGLU1	4	-1.7207	0.889903	4	-2.26005	0.745728	-0.456158	0.113093	0.65301	FALSE	None
ARHGAP1	4	-0.072897	0.216705	4	-0.303273	0.453684	-0.253429	0.366746	0.850815	FALSE	None
ARHGAP10	4	-0.260391	0.181825	4	-0.114655	0.4773	0.137252	0.669947	0.942132	FALSE	None
ARHGAP11A	4	-0.509874	0.0710885	4	-0.430551	0.0639041	0.139634	0.614754	0.927043	FALSE	None
ARHGAP12	4	-0.17468	0.420941	4	0.107654	0.0812627	0.229195	0.457459	0.878783	FALSE	None
ARHGAP15	4	-0.233673	0.231065	4	0.0195147	0.408552	0.228396	0.505445	0.898846	FALSE	None
ARHGAP17	3	-0.486384	0.42521	3	-0.272976	0.196822	0.241302	0.47028	0.88254	FALSE	None
ARHGAP18	4	-0.139843	0.10616	4	-0.773638	0.895348	-0.608381	0.061432	0.543026	FALSE	None
ARHGAP19	4	0.0665215	0.622436	4	0.0494011	0.706034	-0.142006	0.631465	0.931961	FALSE	None
ARHGAP20	4	-0.519363	0.085578	4	-0.753562	0.332934	-0.150281	0.618173	0.927842	FALSE	None
ARHGAP21	4	0.218278	0.44506	4	-0.427283	0.308286	-0.68175	0.045621	0.501548	FALSE	None
ARHGAP22	4	-0.363347	0.459255	4	-0.383311	0.0497268	0.0156706	0.959609	0.994079	FALSE	None
ARHGAP23	4	-0.298005	0.424922	4	-0.0285253	0.119119	0.248756	0.411496	0.867224	FALSE	None
ARHGAP24	4	-0.108888	0.31297	4	-0.381513	0.160872	-0.26377	0.41264	0.867224	FALSE	None
ARHGAP25	4	0.219536	0.0627558	4	-0.0331233	0.299215	-0.337129	0.270461	0.795574	FALSE	None
ARHGAP26	4	-0.201134	0.214565	4	0.300095	0.301154	0.427453	0.186135	0.73467	FALSE	None
ARHGAP27	4	-0.107809	0.29392	4	-0.249398	0.908074	-0.182136	0.536661	0.905608	FALSE	None
ARHGAP28	4	-0.386678	0.753855	4	-0.577436	0.918291	-0.196201	0.497607	0.896219	FALSE	None
ARHGAP29	4	-0.0197874	0.630753	4	-0.366924	0.0625168	-0.359515	0.271429	0.795654	FALSE	None
ARHGAP30	4	-0.303344	0.559472	4	-0.169033	0.117509	0.128437	0.686708	0.946135	FALSE	None
ARHGAP31	4	-0.0851902	0.481546	4	-0.0232576	0.384713	0.00246489	0.993628	0.998754	FALSE	None
ARHGAP32	4	0.093971	0.0398506	4	-0.336602	0.461717	-0.456102	0.139398	0.68853	FALSE	None
ARHGAP33	4	-0.487401	0.381618	4	-0.133339	0.671139	0.341336	0.233468	0.771665	FALSE	None
ARHGAP35	4	-0.248699	0.452492	4	-0.214576	0.417039	0.00308154	0.991191	0.998365	FALSE	None
ARHGAP36	4	0.56772	0.0224628	4	1.1249	0.138075	0.126107	0.656459	0.938161	FALSE	None
ARHGAP39	4	-0.133167	0.0242358	4	-0.308891	0.0407646	-0.170378	0.54317	0.907728	FALSE	None
ARHGAP4	4	0.444725	0.0585837	4	0.315799	0.0868058	-0.306319	0.298102	0.812845	FALSE	None
ARHGAP42	3	-0.777403	0.033075	3	-0.347162	0.0492092	0.514073	0.131854	0.678712	FALSE	None
ARHGAP44	4	0.00215897	0.0727511	4	0.300439	0.0200598	0.199233	0.486597	0.889899	FALSE	None
ARHGAP5	4	-0.106217	0.136336	4	-0.369845	0.209186	-0.264308	0.346108	0.838179	FALSE	None
ARHGAP6	4	0.2742	0.0167327	4	0.32946	0.128433	-0.0936568	0.744424	0.956272	FALSE	None
ARHGAP8	4	-0.361496	0.453008	4	-0.503815	0.316027	-0.120765	0.667976	0.940845	FALSE	None
ARHGAP9	4	-0.34876	0.272127	4	-0.293058	0.141676	0.0753279	0.78807	0.963703	FALSE	None
ARHGDIA	4	-0.621021	0.638791	4	-0.585762	0.444329	0.0787513	0.793044	0.964213	FALSE	None
ARHGDIB	4	0.0859422	0.0227543	4	0.309671	0.284078	0.103009	0.715657	0.951094	FALSE	None
ARHGDIG	4	-0.451474	0.307926	4	-0.124234	0.321016	0.322866	0.256475	0.786151	FALSE	None
ARHGEF1	4	-0.918433	1.58308	4	-0.485735	2.52916	0.40538	0.16228	0.706056	FALSE	None
ARHGEF10	4	0.204224	0.559596	4	0.452405	0.625957	0.032278	0.921979	0.988789	FALSE	None
ARHGEF10L	4	-0.106854	0.0491889	4	-0.234789	0.797129	-0.14335	0.661415	0.938973	FALSE	None
ARHGEF11	4	0.13287	0.538647	4	0.233986	0.183757	-0.0313345	0.918305	0.987819	FALSE	None
ARHGEF12	4	0.346388	0.232652	4	0.928724	0.39682	0.229166	0.415749	0.867245	FALSE	None
ARHGEF15	4	-0.092591	0.274229	4	-0.422099	0.519518	-0.34494	0.225782	0.766159	FALSE	None
ARHGEF16	4	-0.311512	0.338283	4	-0.188826	0.422351	0.112394	0.692551	0.947351	FALSE	None
ARHGEF17	3	-0.419748	0.208722	3	-0.0765141	0.763683	0.320785	0.337263	0.831	FALSE	None
ARHGEF18	4	0.124243	0.140016	4	0.412386	0.30584	0.144839	0.643305	0.935627	FALSE	None
ARHGEF19	4	-0.0954047	0.296484	4	-0.113866	0.174607	-0.0443158	0.893624	0.982835	FALSE	None
ARHGEF2	4	-0.484469	0.0675503	4	-0.0743496	0.0400966	0.431444	0.14066	0.689903	FALSE	None
ARHGEF25	4	-0.480051	0.666459	4	-0.327849	0.438474	0.159178	0.595341	0.921737	FALSE	None
ARHGEF26	4	-0.283092	0.0785214	4	-0.821349	0.555499	-0.480304	0.125285	0.670683	FALSE	None
ARHGEF28	4	-0.00500314	0.426313	4	0.420744	0.0132216	0.300459	0.332948	0.830301	FALSE	None
ARHGEF3	4	0.140549	0.247928	4	0.042484	0.108108	-0.189251	0.512728	0.900646	FALSE	None
ARHGEF33	3	0.208211	0.0603764	3	-0.500873	0.0856529	-0.723408	0.0434618	0.493724	FALSE	None
ARHGEF37	4	-0.453397	0.412778	4	0.46181	0.447936	0.832086	0.00855036	0.268721	TRUE	Positive
ARHGEF38	4	-0.0315946	0.182316	4	0.0725852	0.267144	0.0290222	0.920177	0.98843	FALSE	None
ARHGEF39	4	-0.36247	0.445557	4	0.180817	0.129049	0.511991	0.129881	0.676844	FALSE	None
ARHGEF4	NA	NA	NA	NA	NA	NA	NA	NA	NA	NA	None
ARHGEF40	4	-0.768219	0.169678	4	-0.418038	0.529658	0.416233	0.195682	0.745142	FALSE	None
ARHGEF5	4	-0.108917	0.364328	4	-0.206109	0.0881031	-0.115348	0.69773	0.947824	FALSE	None
ARHGEF6	4	0.234019	0.154722	4	0.851549	0.0573924	0.356547	0.22172	0.763876	FALSE	None
ARHGEF7	4	0.109818	1.63519	4	0.649304	0.450858	0.241355	0.466795	0.882416	FALSE	None
ARHGEF9	4	-0.292463	0.647867	4	0.88555	1.33194	0.910114	0.00674644	0.236989	TRUE	Positive
ARID1A	4	-0.0212995	0.243828	4	-0.0064586	0.233188	-0.0468445	0.868841	0.97935	FALSE	None
ARID1B	4	-0.000378262	0.0525124	4	-0.105345	0.0415969	-0.144954	0.607122	0.925612	FALSE	None
ARID2	4	0.270883	0.0225354	4	1.43306	0.839888	0.684978	0.0303406	0.437506	FALSE	None
ARID3A	4	0.0319443	0.0777353	4	0.0609679	0.313277	-0.0427024	0.886863	0.981794	FALSE	None
ARID3B	4	-1.72264	0.307013	4	-0.930464	0.743438	0.894017	0.00448256	0.196339	TRUE	Positive
ARID3C	4	-0.410106	0.335726	4	-0.602655	0.217592	-0.145584	0.608912	0.926018	FALSE	None
ARID4A	4	0.704063	0.122683	4	0.740638	0.349856	-0.353828	0.212896	0.758029	FALSE	None
ARID4B	4	0.446276	0.485124	4	-0.067733	0.392246	-0.644684	0.0674091	0.565142	FALSE	None
ARID5A	4	-0.482408	0.231426	4	-0.673617	0.626057	-0.117417	0.736912	0.955867	FALSE	None
ARID5B	4	-0.252656	0.0692489	4	-0.884359	0.295634	-0.550743	0.0853112	0.607134	FALSE	None
ARIH1	4	-1.83083	0.851147	4	-1.85209	2.75854	0.0530711	0.88971	0.982232	FALSE	None
ARIH2	4	0.188025	0.125675	4	0.736659	0.661524	0.306024	0.323997	0.824401	FALSE	None
ARIH2OS	4	-0.563119	0.177934	4	-0.232294	0.18285	0.378602	0.231842	0.770206	FALSE	None
ARL1	4	-0.0565722	0.0843719	4	1.05088	0.496559	0.870625	0.0122894	0.324999	TRUE	Positive
ARL10	3	-0.0178846	1.00332	3	0.699049	0.962692	0.439325	0.199842	0.747597	FALSE	None
ARL11	4	-0.478339	0.45576	4	-0.379219	0.212645	0.131556	0.651472	0.937212	FALSE	None
ARL13A	4	0.288174	0.00647331	4	0.353645	0.246247	-0.0954339	0.743045	0.956272	FALSE	None
ARL13B	4	-0.0284409	0.250291	4	0.203802	0.997433	0.113017	0.722127	0.952495	FALSE	None
ARL14	4	-0.0696096	0.142368	4	0.236765	0.489096	0.219198	0.496111	0.895306	FALSE	None
ARL14EP	4	0.0702513	0.366155	4	-0.770813	0.0801409	-0.809999	0.0152745	0.355548	TRUE	Negative
ARL15	4	0.626352	0.167866	4	-0.169886	0.237174	-0.92592	0.00568623	0.217588	TRUE	Negative
ARL16	4	-0.623176	0.137102	4	-0.834059	0.410141	-0.137515	0.622385	0.929141	FALSE	None
ARL2	4	-3.66436	0.916809	4	-3.84836	0.0727249	-0.247431	0.473993	0.883975	FALSE	None
ARL2BP	NA	NA	NA	NA	NA	NA	NA	NA	NA	NA	None
ARL3	4	0.0799706	0.179713	4	-0.147554	1.02389	-0.299909	0.353764	0.843082	FALSE	None
ARL4A	NA	NA	NA	NA	NA	NA	NA	NA	NA	NA	None
ARL4C	4	0.108908	0.107852	4	-0.12935	0.0611406	-0.293574	0.306442	0.8169	FALSE	None
ARL4D	4	-0.143931	0.114932	4	0.230933	0.184043	0.300862	0.285057	0.801953	FALSE	None
ARL5A	3	-0.503243	0.459959	3	0.234593	0.262401	0.707505	0.0524918	0.519042	FALSE	None
ARL5B	4	-0.11488	0.0913801	4	-0.0530398	0.194312	0.0299562	0.922442	0.988863	FALSE	None
ARL5C	4	-0.271326	0.552404	4	-0.022661	0.105871	0.226508	0.484535	0.888532	FALSE	None
ARL6	3	0.156251	0.52829	3	0.0650911	0.377143	-0.180336	0.657239	0.938363	FALSE	None
ARL6IP1	4	0.24557	0.209802	4	-0.451323	0.0644214	-0.724503	0.0208429	0.391948	TRUE	Negative
ARL6IP4	4	-0.477147	1.05855	4	-0.220819	0.435251	0.23303	0.435384	0.87189	FALSE	None
ARL6IP5	4	-0.0365195	0.0643026	4	0.0818974	0.520483	0.0409384	0.885212	0.981557	FALSE	None
ARL6IP6	4	0.244204	0.084544	4	0.201049	0.0823075	-0.162924	0.583364	0.917798	FALSE	None
ARL8A	4	0.0571799	0.00295012	4	0.0315855	0.0690834	-0.0931228	0.738646	0.956272	FALSE	None
ARL8B	4	0.0674081	0.482322	4	0.158356	0.0265109	-0.00648072	0.983146	0.99787	FALSE	None
ARL9	4	-0.704884	0.419033	4	-0.651541	0.223075	0.132492	0.672234	0.942553	FALSE	None
ARMC1	4	-0.400551	0.362912	4	-0.442919	0.162721	0.00942195	0.977144	0.996765	FALSE	None
ARMC10	4	-0.108794	0.0164572	4	-0.182527	0.490797	-0.092321	0.763714	0.958866	FALSE	None
ARMC12	4	-0.2691	0.114984	4	-0.197017	0.0530513	0.0814386	0.779888	0.962912	FALSE	None
ARMC2	4	0.0852797	0.117637	4	0.0695199	0.209819	-0.0956813	0.749793	0.957714	FALSE	None
ARMC3	4	0.0986491	0.0948025	4	0.0600335	0.173552	-0.121527	0.668249	0.941153	FALSE	None
ARMC4	4	-0.344961	0.20304	4	-0.35699	0.736495	-0.00560416	0.985177	0.998192	FALSE	None
ARMC5	4	-0.434413	0.451503	4	-1.01692	0.141157	-0.481059	0.162134	0.705936	FALSE	None
ARMC6	4	-0.0881756	0.884078	4	-0.157731	0.47422	-0.138656	0.676609	0.94407	FALSE	None
ARMC7	4	-2.427	0.801827	4	-2.4921	0.751956	-0.00897529	0.974576	0.996635	FALSE	None
ARMC8	4	-0.470326	0.241007	4	-0.176226	0.887317	0.281307	0.335706	0.830704	FALSE	None
ARMC9	4	0.185678	0.133942	4	-0.00108574	0.0664259	-0.26944	0.365476	0.849665	FALSE	None
ARMCX1	4	0.211051	0.153315	4	0.551666	0.163028	0.156515	0.603939	0.92465	FALSE	None
ARMCX2	4	-0.0860885	0.221146	4	0.510234	0.960121	0.447803	0.171702	0.720144	FALSE	None
ARMCX3	4	0.449067	0.0731039	4	0.942917	0.349848	0.127528	0.647625	0.936382	FALSE	None
ARMCX4	4	0.0405223	0.349182	4	0.756863	0.332951	0.488728	0.110034	0.644555	FALSE	None
ARMCX5	4	-0.207536	0.484239	4	0.206497	2.64345	0.236594	0.447707	0.876253	FALSE	None
ARMCX6	4	-0.473812	0.795465	4	0.426451	0.436711	0.829302	0.0238282	0.407119	FALSE	None
ARMS2	4	-0.36411	0.652662	4	-0.0239042	0.509328	0.295246	0.323954	0.824401	FALSE	None
ARNT	4	0.0306514	0.125286	4	0.445328	0.040013	0.280894	0.321529	0.822052	FALSE	None
ARNT2	4	-0.402845	0.658768	4	-0.0642248	0.114235	0.33217	0.299725	0.81344	FALSE	None
ARNTL	4	-0.0985455	0.138299	4	-0.142479	0.193883	-0.0733691	0.791059	0.963931	FALSE	None
ARNTL2	4	-0.207995	0.053026	4	-0.182463	0.136245	0.0249811	0.932779	0.990634	FALSE	None
ARPC1A	4	-0.0120049	0.296215	4	-0.0525945	0.265458	-0.0954561	0.757157	0.958382	FALSE	None
ARPC1B	4	0.120524	0.0942364	4	0.0966855	0.622287	-0.135713	0.646309	0.936151	FALSE	None
ARPC2	4	-1.45792	0.928053	4	-1.03626	0.541133	0.521036	0.0899557	0.616698	FALSE	None
ARPC3	4	-1.6173	1.10515	4	-1.64567	0.778365	0.0635771	0.838964	0.975116	FALSE	None
ARPC4	4	-3.66412	0.0846302	4	-2.1868	0.367227	1.50396	8.74874e-05	0.0146346	TRUE	Positive
ARPC5	4	0.12433	0.232516	4	-0.03716	0.490647	-0.250625	0.411373	0.867224	FALSE	None
ARPC5L	4	-0.110845	0.104096	4	-0.274079	0.35751	-0.16883	0.57898	0.916925	FALSE	None
ARPP19	4	-0.123967	0.360222	4	0.431191	0.595228	0.411201	0.149903	0.694971	FALSE	None
ARPP21	4	-0.619248	0.34427	4	-0.459622	1.53798	0.176428	0.602847	0.924162	FALSE	None
ARR3	4	-0.174241	1.062	4	0.583637	0.918185	0.530536	0.0815206	0.599844	FALSE	None
ARRB1	3	-0.358405	0.532545	3	-0.0850531	0.219447	0.254643	0.450341	0.87697	FALSE	None
ARRB2	4	0.0478738	0.201138	4	0.287331	0.103518	0.134508	0.664247	0.939695	FALSE	None
ARRDC1	4	-0.22198	1.89384	4	-0.620434	1.03011	-0.419176	0.314065	0.819465	FALSE	None
ARRDC2	4	0.356434	0.240875	4	0.3469	0.107452	-0.183985	0.552409	0.90873	FALSE	None
ARRDC3	4	-0.129904	0.222497	4	-0.28435	0.110111	-0.155046	0.60696	0.925612	FALSE	None
ARRDC4	4	-0.197617	0.326956	4	-0.570757	0.17144	-0.348583	0.222927	0.764301	FALSE	None
ARRDC5	3	0.0200419	0.0334675	3	-0.425002	0.00974322	-0.444253	0.183466	0.732195	FALSE	None
ARSA	4	-0.330202	0.212557	4	0.00820185	0.55092	0.308248	0.293414	0.808932	FALSE	None
ARSB	4	-0.389054	0.530124	4	-0.164827	0.190575	0.231421	0.466898	0.882416	FALSE	None
ARSD	4	0.657519	0.0503323	4	0.343597	0.129519	-0.557848	0.0535419	0.5211	FALSE	None
ARSE	4	-0.166953	0.043669	4	-0.257967	0.0658947	-0.0883089	0.751417	0.957792	FALSE	None
ARSF	4	-0.00453175	0.234203	4	0.584098	0.35327	0.408273	0.15192	0.696924	FALSE	None
ARSG	4	0.340846	0.177186	4	0.320463	0.054013	-0.195775	0.494059	0.894143	FALSE	None
ARSH	4	0.0893849	0.175892	4	0.195764	0.500469	-0.0112831	0.967769	0.995892	FALSE	None
ARSI	4	-0.0956082	0.333304	4	-0.572786	0.453883	-0.467794	0.142545	0.690193	FALSE	None
ARSJ	3	0.365399	0.0200328	3	0.0885223	0.381388	-0.411318	0.22707	0.766905	FALSE	None
ARSK	4	0.387967	0.11758	4	-0.0302911	0.219297	-0.529526	0.0932515	0.61848	FALSE	None
ART1	4	-0.182135	0.199906	4	-0.137782	0.45811	0.0161157	0.954162	0.993107	FALSE	None
ART3	4	0.0235421	0.219579	4	-0.171297	0.293652	-0.234482	0.454484	0.878027	FALSE	None
ART4	4	-0.0816488	0.0473629	4	0.337836	0.208525	0.325309	0.272372	0.796584	FALSE	None
ART5	4	0.193637	0.225407	4	-0.244955	0.790622	-0.516428	0.0944266	0.619631	FALSE	None
ARTN	4	-0.114611	0.148119	4	0.0514827	0.419232	0.106483	0.705956	0.949472	FALSE	None
ARV1	4	-0.147833	0.171592	4	0.05506	0.180291	0.154025	0.594545	0.92151	FALSE	None
ARVCF	4	-0.461436	0.621847	4	-0.722237	0.643194	-0.23173	0.432866	0.871768	FALSE	None
ARX	4	-0.626791	0.98438	4	0.0961584	2.42712	0.603786	0.0524574	0.519042	FALSE	None
AS3MT	4	0.026414	0.00624977	4	-0.48533	0.295953	-0.508215	0.0897208	0.616241	FALSE	None
ASAH1	4	-0.0693303	0.39701	4	-0.0229928	0.400397	-0.00322803	0.992199	0.998365	FALSE	None
ASAH2	4	-0.362633	0.215746	4	0.278314	0.106644	0.597834	0.0646416	0.555191	FALSE	None
ASAP1	4	0.416596	0.0690461	4	0.371587	0.022106	-0.228601	0.425939	0.871768	FALSE	None
ASAP2	4	0.2899	0.0924754	4	0.250294	0.730757	-0.213962	0.47163	0.882907	FALSE	None
ASAP3	4	-0.373427	0.601899	4	-0.34959	1.11226	-0.00561822	0.984351	0.998036	FALSE	None
ASB1	4	0.137955	0.188756	4	0.0455951	0.0450766	-0.179664	0.529651	0.904489	FALSE	None
ASB10	3	-0.24296	0.225888	3	-0.573608	0.264664	-0.286531	0.417667	0.868265	FALSE	None
ASB11	4	0.258095	0.0413469	4	0.571314	0.104642	0.117436	0.678262	0.944651	FALSE	None
ASB12	3	-0.078827	0.828246	3	0.604527	1.31857	0.414864	0.216121	0.76078	FALSE	None
ASB13	4	-0.136699	0.0211754	4	-0.0967121	0.065852	0.0171621	0.950857	0.992778	FALSE	None
ASB14	4	-0.596693	0.592859	4	-0.505769	0.145229	0.143089	0.645217	0.935627	FALSE	None
ASB15	4	0.201994	0.29755	4	-0.198064	0.0458105	-0.458758	0.141905	0.690193	FALSE	None
ASB16	4	0.14235	0.619215	4	0.317901	0.338131	-0.00445801	0.988129	0.998365	FALSE	None
ASB17	4	0.307409	0.29743	4	0.388504	0.312766	-0.0966609	0.769992	0.960143	FALSE	None
ASB18	4	0.0681986	0.206754	4	-0.205542	0.559789	-0.325668	0.285005	0.801953	FALSE	None
ASB2	3	-0.596939	0.0315945	3	-0.14888	0.171233	0.492466	0.159611	0.703486	FALSE	None
ASB4	4	-0.24075	0.259021	4	0.34504	0.0986886	0.508379	0.0907517	0.617801	FALSE	None
ASB5	4	0.282905	0.403052	4	0.489135	0.311608	-0.0254093	0.932053	0.990634	FALSE	None
ASB6	4	0.153466	0.0306854	4	-0.147989	0.0184236	-0.357337	0.204563	0.753693	FALSE	None
ASB7	4	0.261155	0.038149	4	0.845127	0.287198	0.306729	0.280756	0.799767	FALSE	None
ASB8	4	0.15882	0.264992	4	-0.409869	0.437482	-0.607675	0.0397472	0.485818	FALSE	None
ASB9	4	-0.486268	0.991393	4	-0.0216126	1.59677	0.376723	0.231902	0.770206	FALSE	None
ASCC1	4	0.0604817	0.0989219	4	0.236143	0.420114	0.0601647	0.834367	0.973419	FALSE	None
ASCC2	4	0.396182	0.267182	4	-0.56837	0.454249	-0.995118	0.00858575	0.269286	TRUE	Negative
ASCC3	4	-2.37608	0.76492	4	-1.6865	1.35085	0.769228	0.05173	0.518008	FALSE	None
ASCL1	4	0.367911	0.0520235	4	0.172735	0.00861188	-0.33344	0.241522	0.776619	FALSE	None
ASCL2	4	0.274808	0.279434	4	0.0511877	0.674536	-0.365692	0.235919	0.773218	FALSE	None
ASCL3	4	-0.132594	0.426451	4	-0.533416	0.108267	-0.381483	0.196642	0.745322	FALSE	None
ASCL4	4	0.333267	0.499809	4	0.617731	0.121948	0.0223312	0.94121	0.991496	FALSE	None
ASCL5	4	-0.212455	0.146293	4	0.676812	0.419352	0.739807	0.0191456	0.385377	TRUE	Positive
ASF1A	4	-0.855947	0.12714	4	-0.714661	0.143498	0.24921	0.409627	0.866224	FALSE	None
ASF1B	4	-0.626415	1.17633	4	-0.267939	2.08839	0.291503	0.307734	0.8169	FALSE	None
ASGR1	4	0.0676918	0.0391729	4	0.130896	0.429327	-0.0357955	0.899372	0.983392	FALSE	None
ASGR2	4	0.0178911	0.115755	4	0.529554	0.014152	0.37202	0.208026	0.756318	FALSE	None
ASH1L	4	0.00802204	0.00512963	4	-0.177823	0.561707	-0.223993	0.46461	0.881891	FALSE	None
ASH2L	4	-1.45222	2.50713	4	-1.90261	5.03155	-0.482377	0.139039	0.688315	FALSE	None
ASIC1	3	-0.41032	0.525503	3	-0.366759	0.293806	0.0785887	0.835047	0.97363	FALSE	None
ASIC2	4	-0.125622	0.114603	4	-0.628415	0.153465	-0.458586	0.139518	0.688669	FALSE	None
ASIC3	4	0.368201	0.245437	4	0.307186	0.0581544	-0.235532	0.428549	0.871768	FALSE	None
ASIC4	4	-0.128938	0.188511	4	-0.36021	0.264687	-0.228786	0.429564	0.871768	FALSE	None
ASIC5	4	0.382953	0.118968	4	0.130724	0.166298	-0.395415	0.172886	0.721351	FALSE	None
ASIP	4	-0.386747	0.334408	4	0.102622	0.539593	0.437242	0.123796	0.667918	FALSE	None
ASL	4	0.170024	0.191948	4	-0.566429	0.716956	-0.764716	0.0129224	0.3328	TRUE	Negative
ASNA1	4	-3.26258	0.771769	4	-2.64211	3.69222	0.604828	0.0952117	0.619829	FALSE	None
ASNS	4	-0.0790485	0.184316	4	-0.0645887	0.11368	-0.0218459	0.94165	0.991496	FALSE	None
ASNSD1	4	-0.494803	0.495651	4	-1.17743	0.528271	-0.603518	0.051095	0.516155	FALSE	None
ASPA	4	0.0307962	0.0260198	4	0.367102	0.310445	0.21537	0.454084	0.878027	FALSE	None
ASPDH	4	-0.169188	0.900776	4	-0.608728	1.12687	-0.482389	0.0936186	0.61848	FALSE	None
ASPG	4	-0.166026	0.0887857	4	-0.53005	0.952988	-0.346201	0.293277	0.808932	FALSE	None
ASPH	4	0.00189313	0.135495	4	0.110168	0.435959	0.0267371	0.928246	0.990211	FALSE	None
ASPHD1	4	-0.236351	0.408833	4	0.183263	0.307079	0.344418	0.249584	0.782618	FALSE	None
ASPHD2	4	1.3417e-05	0.320137	4	0.185978	0.549453	0.0906188	0.781838	0.96339	FALSE	None
ASPM	4	-0.953875	0.228775	4	-2.93967	1.22174	-1.89906	5.92585e-06	0.00192744	TRUE	Negative
ASPN	4	0.207087	0.216335	4	0.456297	0.665232	0.0583472	0.856187	0.978289	FALSE	None
ASPRV1	4	-0.138677	0.079517	4	-0.355798	0.604043	-0.230706	0.424375	0.870983	FALSE	None
ASPSCR1	4	-0.488641	0.0892239	4	0.0467454	0.4365	0.531324	0.0803431	0.595923	FALSE	None
ASRGL1	4	-0.345621	0.845463	4	-0.57314	0.9711	-0.24658	0.376023	0.854616	FALSE	None
ASS1	4	0.309373	0.0538977	4	0.157481	0.0333289	-0.276467	0.335482	0.830675	FALSE	None
ASTE1	4	-0.129918	0.353963	4	-0.338934	0.633199	-0.228464	0.468622	0.882416	FALSE	None
ASTL	4	-0.906831	0.068056	4	-0.355512	0.153694	0.633561	0.0312621	0.441744	FALSE	None
ASTN1	4	0.118556	0.115537	4	0.278877	0.256981	0.032677	0.909723	0.986027	FALSE	None
ASTN2	4	0.321684	0.0289588	4	-0.0218325	0.104441	-0.441992	0.13341	0.681163	FALSE	None
ASUN	4	-2.21931	1.01138	4	-2.44381	1.96664	-0.170575	0.648022	0.93643	FALSE	None
ASXL1	4	0.103568	0.179234	4	-0.451031	0.353665	-0.576621	0.0471908	0.50209	FALSE	None
ASXL2	4	-0.0844949	0.117282	4	0.654012	0.0807963	0.591832	0.0522188	0.518176	FALSE	None
ASXL3	4	0.553645	0.240974	4	-0.245861	0.0478737	-0.908373	0.00527543	0.212287	TRUE	Negative
ASZ1	4	-0.384493	0.11064	4	-0.381117	0.0756855	0.0439723	0.875687	0.97935	FALSE	None
ATAD1	4	-0.440717	0.093747	4	-0.192087	0.1237	0.274716	0.327731	0.826304	FALSE	None
ATAD2	4	0.299884	0.120415	4	0.686855	0.266836	0.129804	0.650923	0.937165	FALSE	None
ATAD2B	4	0.0541593	0.171713	4	0.280872	0.0188028	0.120285	0.683557	0.946135	FALSE	None
ATAD3A	3	-0.704073	0.952528	3	-0.424655	0.418605	0.306381	0.374049	0.85392	FALSE	None
ATAD3B	4	-0.363051	0.743558	4	-0.440502	0.887746	-0.094005	0.758654	0.958771	FALSE	None
ATAD3C	4	0.373399	0.0666025	4	0.0883015	0.138893	-0.416305	0.142894	0.690193	FALSE	None
ATAD5	4	-0.985951	0.20332	4	-1.06989	0.704063	0.0099665	0.9729	0.996635	FALSE	None
ATAT1	4	0.0103831	0.221701	4	0.175243	0.0454373	0.0756161	0.790885	0.963931	FALSE	None
ATCAY	4	-0.229515	0.920922	4	-0.00825692	0.32207	0.149808	0.613083	0.926748	FALSE	None
ATE1	4	-0.0868883	0.155449	4	-0.0465025	0.0806895	0.00370906	0.990002	0.998365	FALSE	None
ATF1	4	-0.716262	0.00294312	4	-0.220769	0.057081	0.560424	0.0532506	0.5211	FALSE	None
ATF2	4	-0.017167	0.230056	4	0.0375307	0.180067	-0.00338867	0.991453	0.998365	FALSE	None
ATF3	4	-0.0338237	0.219073	4	0.382063	0.303438	0.28891	0.307501	0.8169	FALSE	None
ATF4	4	-0.00768007	0.479436	4	0.401123	0.208708	0.264548	0.387505	0.858661	FALSE	None
ATF5	4	-0.424115	0.112639	4	-0.56718	0.599972	-0.0982837	0.744416	0.956272	FALSE	None
ATF6	4	0.121267	0.0255678	4	-0.343211	0.440617	-0.490902	0.121225	0.666291	FALSE	None
ATF6B	4	0.107962	0.159747	4	0.258978	0.368644	0.00261626	0.992432	0.998365	FALSE	None
ATF7	4	-0.151706	0.207585	4	0.195197	0.408787	0.276739	0.363519	0.848597	FALSE	None
ATF7IP	NA	NA	NA	NA	NA	NA	NA	NA	NA	NA	None
ATF7IP2	4	-0.13743	0.560947	4	-0.355617	0.0941004	-0.207769	0.543073	0.907728	FALSE	None
ATG10	4	0.0953467	0.688114	4	-0.00235486	0.12745	-0.192399	0.552183	0.90873	FALSE	None
ATG12	4	-0.46682	0.234171	4	-0.277372	0.231374	0.224894	0.457408	0.878783	FALSE	None
ATG13	4	-0.686184	0.0987263	4	-1.2421	0.688618	-0.45242	0.167107	0.712741	FALSE	None
ATG14	4	-0.441589	0.215458	4	-0.206289	0.343811	0.2571	0.393638	0.860666	FALSE	None
ATG16L1	4	0.117725	0.169542	4	-0.643852	0.314683	-0.743755	0.0326064	0.449298	FALSE	None
ATG16L2	4	-0.309632	0.453826	4	-0.0376988	0.667277	0.239348	0.464074	0.881891	FALSE	None
ATG2A	4	-0.15696	0.133451	4	0.347989	0.0408231	0.422648	0.156609	0.699342	FALSE	None
ATG2B	4	0.21729	0.081437	4	0.134442	0.284813	-0.19891	0.496121	0.895306	FALSE	None
ATG3	4	-0.132242	1.12584	4	-0.907867	1.12899	-0.783603	0.024413	0.410718	FALSE	None
ATG4A	4	-0.188139	0.0768504	4	0.891455	0.277242	0.898194	0.00507555	0.207318	TRUE	Positive
ATG4B	4	0.0751091	0.0366465	4	0.378943	0.208806	0.176373	0.546427	0.908134	FALSE	None
ATG4C	4	0.0119939	0.114733	4	0.144037	0.350684	0.0346406	0.901453	0.984218	FALSE	None
ATG4D	4	0.380741	1.05717	4	-0.249691	0.161243	-0.743808	0.0310203	0.440884	FALSE	None
ATG5	4	-0.305194	0.304036	4	-0.314384	0.520967	-0.0127939	0.964934	0.995015	FALSE	None
ATG7	4	0.105042	0.67296	4	-0.350344	0.144482	-0.494909	0.129749	0.676844	FALSE	None
ATG9A	4	-1.06165	0.113155	4	-1.1277	0.399421	0.0536325	0.869571	0.97935	FALSE	None
ATHL1	4	-1.0026	0.786755	4	-0.892908	2.48471	0.119298	0.708956	0.9496	FALSE	None
ATIC	4	-2.08064	2.61727	4	-2.13385	1.16717	-0.0256599	0.931663	0.990634	FALSE	None
ATL1	4	-0.253356	0.0656456	4	-0.235922	0.36696	0.0232569	0.936551	0.991167	FALSE	None
ATL2	4	-3.02685	0.904002	4	-3.34139	0.36393	-0.311317	0.30597	0.8169	FALSE	None
ATL3	4	-0.127005	0.612271	4	-0.595008	0.508885	-0.47458	0.106033	0.639075	FALSE	None
ATM	4	-1.96018	0.237899	4	-2.31888	0.618938	-0.2727	0.340484	0.833133	FALSE	None
ATMIN	4	0.00875667	0.0125281	4	-1.42311	0.163658	-1.33477	9.01911e-05	0.0149445	TRUE	Negative
ATN1	4	-0.240517	0.604215	4	0.15049	0.497452	0.309302	0.30585	0.8169	FALSE	None
ATOH1	4	0.200927	0.0591549	4	0.246005	0.0739464	-0.0784741	0.783545	0.96339	FALSE	None
ATOH7	4	-0.489751	1.11969	4	-0.921228	1.13624	-0.422242	0.151429	0.696744	FALSE	None
ATOH8	4	-0.373597	1.00395	4	-0.504872	0.153483	-0.104947	0.764071	0.958866	FALSE	None
ATOX1	4	0.107667	0.372676	4	-0.341485	0.802301	-0.487603	0.169223	0.716134	FALSE	None
ATP10A	4	-0.0647541	0.47498	4	-0.585212	0.197061	-0.491269	0.161211	0.70478	FALSE	None
ATP10B	4	0.0836449	0.344392	4	-0.811582	0.40543	-0.870961	0.00889355	0.274843	TRUE	Negative
ATP10D	4	-0.290633	0.423217	4	-0.0378196	0.43062	0.206212	0.463285	0.88113	FALSE	None
ATP11A	4	0.211017	0.232873	4	0.0681448	0.374251	-0.248696	0.444335	0.874597	FALSE	None
ATP11B	4	-0.351615	0.223502	4	-0.604795	0.623325	-0.22533	0.423267	0.870828	FALSE	None
ATP11C	4	0.219847	0.051144	4	0.795149	0.0977084	0.338898	0.242887	0.777627	FALSE	None
ATP12A	4	-0.330618	0.168519	4	-0.364393	0.287443	-0.0138039	0.96205	0.994451	FALSE	None
ATP13A1	4	-2.76763	0.0605498	4	-2.3265	0.56155	0.50511	0.140584	0.689903	FALSE	None
ATP13A2	4	0.0352158	0.108195	4	0.210286	0.0302928	0.0827922	0.773176	0.960975	FALSE	None
ATP13A3	4	-0.528347	0.062796	4	-0.267738	0.405546	0.289651	0.318681	0.820921	FALSE	None
ATP13A4	4	0.320633	0.024751	4	-0.263959	0.25326	-0.650268	0.032357	0.44768	FALSE	None
ATP13A5	4	-0.0950603	0.136339	4	-0.0673071	0.247265	-0.0101495	0.972217	0.996635	FALSE	None
ATP1A1	4	-1.95866	0.044471	4	0.448116	0.116645	2.50733	7.77199e-09	1.9501e-05	TRUE	Positive
ATP1A2	4	-0.0468957	0.12834	4	0.0494333	0.205435	0.0377851	0.89962	0.983392	FALSE	None
ATP1A3	4	0.355252	0.02024	4	-0.299743	0.0764112	-0.71753	0.0181651	0.38073	TRUE	Negative
ATP1A4	4	0.0470415	0.650127	4	-0.177338	0.244924	-0.269463	0.436362	0.87214	FALSE	None
ATP1B1	4	-0.513739	0.798406	4	-0.40837	0.399166	0.112767	0.696643	0.947548	FALSE	None
ATP1B2	4	-0.0660316	0.264807	4	-0.192722	1.19806	-0.196911	0.510321	0.899577	FALSE	None
ATP1B3	4	-0.57086	0.0879085	4	0.813798	0.466892	1.27694	0.000235588	0.0283093	TRUE	Positive
ATP1B4	4	0.13663	0.174045	4	0.890483	0.212773	0.491934	0.101025	0.630234	FALSE	None
ATP2A1	4	0.271835	0.142162	4	-0.22141	0.105732	-0.555178	0.0787905	0.593177	FALSE	None
ATP2A2	4	-3.56219	1.14592	4	-3.53477	1.84809	-0.0167805	0.953953	0.993107	FALSE	None
ATP2A3	4	0.0585084	0.375281	4	0.025317	0.341607	-0.110791	0.730905	0.953902	FALSE	None
ATP2B1	4	-0.333904	0.399551	4	-1.12403	1.14006	-0.735048	0.0286328	0.433934	FALSE	None
ATP2B2	4	-0.218039	0.229564	4	-0.412808	0.187181	-0.182545	0.515447	0.901472	FALSE	None
ATP2B3	4	0.42305	0.0852164	4	0.612251	0.667854	-0.0598232	0.857334	0.978478	FALSE	None
ATP2B4	4	-0.356388	0.0828091	4	-0.254594	0.0665229	0.126777	0.648749	0.936827	FALSE	None
ATP2C1	4	0.308039	0.0320583	4	0.986071	0.0415679	0.379594	0.190766	0.742045	FALSE	None
ATP2C2	4	0.0541365	0.116944	4	0.00596061	0.124857	-0.114167	0.691287	0.946922	FALSE	None
ATP4A	4	-0.0744166	0.483164	4	-0.226625	0.404794	-0.196128	0.500024	0.897653	FALSE	None
ATP4B	4	-0.112772	0.382619	4	0.066346	0.38969	0.0968138	0.736511	0.955796	FALSE	None
ATP5A1	4	-3.20234	1.60738	4	-2.97763	1.40582	0.206806	0.463311	0.88113	FALSE	None
ATP5B	4	-2.89758	1.64009	4	-2.72622	1.83521	0.183658	0.528786	0.904489	FALSE	None
ATP5C1	4	-1.83209	0.75398	4	-1.82639	1.96415	0.0871612	0.809792	0.967843	FALSE	None
ATP5D	4	-2.12225	1.8043	4	-2.08641	2.51488	0.0830383	0.769555	0.960143	FALSE	None
ATP5F1	4	-2.34847	1.67474	4	-2.34341	1.78225	0.0589927	0.844336	0.975967	FALSE	None
ATP5G1	3	-0.262327	0.607521	3	-0.209315	0.376532	0.0255468	0.938563	0.991245	FALSE	None
ATP5G2	4	0.0467228	0.241624	4	-0.468665	0.0148911	-0.514923	0.092552	0.61848	FALSE	None
ATP5G3	4	0.206445	0.00994762	4	-0.178689	0.130747	-0.444214	0.122531	0.667171	FALSE	None
ATP5H	4	-1.6549	0.978358	4	-1.65274	3.40274	0.066884	0.876993	0.979555	FALSE	None
ATP5I	4	-1.54281	3.59114	4	-1.31611	4.20399	0.123459	0.667343	0.940329	FALSE	None
ATP5J	4	-2.02149	0.288738	4	-1.58424	0.317682	0.533551	0.0672822	0.564483	FALSE	None
ATP5J2	NA	NA	NA	NA	NA	NA	NA	NA	NA	NA	None
ATP5L	3	-1.44791	2.12564	3	-1.54411	3.54607	-0.103712	0.786742	0.96339	FALSE	None
ATP5L2	NA	NA	NA	NA	NA	NA	NA	NA	NA	NA	None
ATP5O	4	-2.92011	0.4857	4	-2.275	1.39539	0.687759	0.0613285	0.543026	FALSE	None
ATP5S	4	0.248412	0.152997	4	0.212922	0.0264452	-0.167064	0.555622	0.909997	FALSE	None
ATP5SL	4	-1.56305	0.546729	4	-1.84148	0.846544	-0.181337	0.5265	0.904188	FALSE	None
ATP6AP1	4	-1.48088	0.986007	4	-0.499182	0.504669	1.05134	0.001562	0.106751	TRUE	Positive
ATP6AP1L	4	-0.0411312	0.330169	4	-0.378563	1.06083	-0.389705	0.182656	0.731451	FALSE	None
ATP6AP2	4	-2.29461	0.918085	4	-2.44338	1.84681	-0.100066	0.735911	0.955705	FALSE	None
ATP6V0A1	4	-0.360207	0.0959247	4	-0.133349	0.344187	0.237806	0.440909	0.872872	FALSE	None
ATP6V0A2	4	-0.174118	0.117156	4	-0.160909	0.167945	-0.0007137	0.998011	0.999491	FALSE	None
ATP6V0A4	4	-0.162579	0.0981006	4	0.0122125	0.0103307	0.14082	0.618189	0.927842	FALSE	None
ATP6V0B	3	-2.53236	0.655705	3	-2.3565	0.716562	0.226707	0.519886	0.902697	FALSE	None
ATP6V0C	4	-3.26401	2.19711	4	-2.70137	1.89946	0.566588	0.115903	0.656052	FALSE	None
ATP6V0D1	4	-2.31303	1.99897	4	-2.4473	2.20928	-0.100213	0.768004	0.960132	FALSE	None
ATP6V0D2	4	-0.00864598	0.396887	4	-0.0363649	0.402349	-0.110999	0.690511	0.946738	FALSE	None
ATP6V0E1	4	-0.252672	0.0991397	4	0.359815	0.352849	0.533697	0.0762386	0.588188	FALSE	None
ATP6V0E2	4	0.234182	0.0727375	4	0.074528	0.64392	-0.271504	0.390904	0.859195	FALSE	None
ATP6V1A	3	-2.99619	1.59783	3	-3.09262	0.731335	-0.103548	0.754927	0.958195	FALSE	None
ATP6V1B1	4	0.135494	0.083626	4	-0.127602	0.205161	-0.322867	0.260622	0.788614	FALSE	None
ATP6V1B2	4	-3.04377	2.07504	4	-2.85693	1.40078	0.18906	0.551518	0.908449	FALSE	None
ATP6V1C1	4	-1.65014	1.06443	4	-1.84051	1.79194	-0.105019	0.76857	0.960132	FALSE	None
ATP6V1C2	4	-0.243576	0.124421	4	0.0735644	0.108842	0.285624	0.339013	0.831703	FALSE	None
ATP6V1D	4	-2.41889	1.3192	4	-2.18687	1.92304	0.271456	0.352233	0.841792	FALSE	None
ATP6V1E1	4	-2.01699	1.21617	4	-2.59313	2.61532	-0.536973	0.0902659	0.617124	FALSE	None
ATP6V1E2	4	0.0423999	0.195697	4	-0.288907	0.30053	-0.364741	0.194023	0.744216	FALSE	None
ATP6V1F	4	-2.13197	1.76643	4	-2.99773	2.05138	-0.837156	0.00953086	0.284733	TRUE	Negative
ATP6V1G1	4	-1.51813	1.65234	4	-1.66031	1.11613	-0.0831313	0.776941	0.961869	FALSE	None
ATP6V1G2	4	-0.285993	0.316811	4	0.288669	0.104784	0.514431	0.103559	0.634247	FALSE	None
ATP6V1G3	4	0.450038	0.615234	4	0.351422	0.193849	-0.326158	0.291651	0.808043	FALSE	None
ATP6V1H	4	-2.53405	0.617961	4	-1.74318	4.78262	0.829886	0.0709481	0.573108	FALSE	None
ATP7A	4	0.167597	0.0760972	4	0.614647	0.224111	0.259424	0.390465	0.859195	FALSE	None
ATP7B	4	-0.0656998	0.00846681	4	-0.235081	0.132809	-0.184205	0.512496	0.900418	FALSE	None
ATP8A1	4	-0.0955089	0.122308	4	0.223554	0.106254	0.240226	0.393006	0.860612	FALSE	None
ATP8A2	4	0.11244	0.431552	4	-0.477104	0.100675	-0.598297	0.0760247	0.587223	FALSE	None
ATP8B1	4	0.455473	0.0444215	4	0.631729	0.120066	-0.0843021	0.761173	0.958844	FALSE	None
ATP8B2	4	0.113668	0.0307906	4	-1.37463	0.67916	-1.41698	0.000108859	0.0170714	TRUE	Negative
ATP8B3	4	-0.155805	0.251559	4	-0.0653899	0.142472	0.0591923	0.839275	0.975231	FALSE	None
ATP8B4	4	-0.1246	0.237068	4	-0.4031	0.20349	-0.273685	0.334704	0.830675	FALSE	None
ATP9A	4	0.113504	0.122773	4	0.0645732	0.335056	-0.143899	0.604449	0.924839	FALSE	None
ATP9B	4	-0.365157	0.252075	4	0.0169423	0.151388	0.363542	0.207961	0.756272	FALSE	None
ATPAF1	4	-0.247639	0.217923	4	0.0759461	0.138827	0.285654	0.318293	0.820921	FALSE	None
ATPAF2	4	-2.03613	2.43054	4	-2.04005	1.8114	0.0289966	0.919536	0.988223	FALSE	None
ATPIF1	4	0.0143856	0.0654509	4	-0.307204	0.199461	-0.340686	0.231827	0.770206	FALSE	None
ATR	4	-2.07083	2.94816	4	-1.92047	2.15451	0.144657	0.635669	0.932675	FALSE	None
ATRAID	4	0.267442	0.112091	4	0.293546	0.410998	-0.124493	0.69348	0.947548	FALSE	None
ATRIP	4	-1.09159	0.11519	4	-1.61507	0.504104	-0.408597	0.212746	0.757958	FALSE	None
ATRN	4	-0.0869774	0.333379	4	-0.587755	0.343203	-0.481537	0.114827	0.655991	FALSE	None
ATRNL1	4	0.182425	0.0375804	4	-0.304283	0.239356	-0.526615	0.0749681	0.585015	FALSE	None
ATRX	4	-0.909694	0.63743	4	-0.804666	0.75473	0.188112	0.578286	0.916925	FALSE	None
ATXN1	4	-0.0997745	0.294728	4	-0.171891	0.70321	-0.12088	0.686434	0.946135	FALSE	None
ATXN10	4	-1.59251	0.757452	4	-1.42009	1.02921	0.259026	0.378834	0.857123	FALSE	None
ATXN1L	4	-0.302528	1.37104	4	0.0333437	0.369143	0.247271	0.460431	0.879819	FALSE	None
ATXN2	4	0.478085	0.118936	4	0.734859	0.546266	-0.0449321	0.887946	0.981896	FALSE	None
ATXN2L	4	-0.498925	0.652092	4	-0.228162	0.218507	0.287921	0.367997	0.851859	FALSE	None
ATXN3	4	0.205365	0.448726	4	0.0158594	0.148576	-0.298862	0.30871	0.8169	FALSE	None
ATXN3L	4	-0.0141966	0.264248	4	0.48194	0.270354	0.362795	0.257615	0.786912	FALSE	None
ATXN7	4	-0.0823295	0.0338506	4	0.0539135	0.107058	0.0853778	0.760553	0.958844	FALSE	None
ATXN7L1	4	0.0660706	0.10861	4	-0.328848	1.20019	-0.440843	0.198238	0.747171	FALSE	None
ATXN7L2	4	-0.64929	0.393495	4	-0.230013	0.261921	0.445452	0.133282	0.681108	FALSE	None
ATXN7L3	4	-1.3709	0.752924	4	-1.10746	0.383464	0.35927	0.226109	0.766316	FALSE	None
ATXN7L3B	3	-0.769201	0.692626	3	-0.504254	0.646538	0.301309	0.363828	0.848823	FALSE	None
AUH	4	0.18967	0.408462	4	0.242998	0.189957	-0.0863358	0.785461	0.96339	FALSE	None
AUNIP	4	-0.228344	0.165954	4	0.0854668	0.0597825	0.275701	0.333055	0.830301	FALSE	None
AUP1	4	-0.649542	0.0866814	4	-0.648451	0.653287	0.0670164	0.815763	0.968856	FALSE	None
AURKA	4	-1.4032	1.06198	4	-1.17592	1.03103	0.310408	0.372488	0.853764	FALSE	None
AURKAIP1	4	-3.03072	1.16614	4	-2.67583	0.306601	0.376635	0.245463	0.780893	FALSE	None
AURKB	4	-3.00507	2.42389	4	-2.80637	2.43728	0.173273	0.545363	0.907728	FALSE	None
AURKC	4	-0.612037	1.13925	4	-1.38557	0.568077	-0.704769	0.0424177	0.490633	FALSE	None
AUTS2	4	-0.0721791	0.0831848	4	0.28293	0.0738963	0.267971	0.355993	0.845134	FALSE	None
AVEN	4	-0.231091	0.322653	4	0.0321046	0.104082	0.22632	0.430856	0.871768	FALSE	None
AVIL	4	-0.474298	0.718557	4	-0.556688	0.257706	-0.0435073	0.889101	0.982197	FALSE	None
AVL9	4	-0.149283	0.282094	4	-0.195407	0.106789	-0.0584169	0.843299	0.975967	FALSE	None
AVP	4	-0.718249	0.206892	4	-0.146516	0.200655	0.629349	0.0603206	0.539982	FALSE	None
AVPI1	4	-0.181882	0.391597	4	0.32425	0.149302	0.4172	0.161305	0.70478	FALSE	None
AVPR1A	4	-0.0753217	0.397442	4	-0.197184	0.214536	-0.158863	0.578809	0.916925	FALSE	None
AVPR1B	4	-0.280953	0.0898336	4	0.125111	0.168391	0.368182	0.195636	0.745142	FALSE	None
AVPR2	4	-0.0115425	0.919619	4	0.170259	0.31714	0.0545769	0.860397	0.979003	FALSE	None
AWAT1	4	0.1186	0.131768	4	1.06986	0.174871	0.656844	0.0305419	0.438833	FALSE	None
AWAT2	4	0.0616279	0.0446602	4	0.864665	0.135211	0.587204	0.0516278	0.518008	FALSE	None
AXDND1	4	0.0253619	0.131847	4	0.22624	0.482074	0.097836	0.743949	0.956272	FALSE	None
AXIN1	4	-0.0282759	0.0412861	4	-0.66164	0.0718659	-0.598339	0.0413598	0.489711	FALSE	None
AXIN2	4	0.299645	0.262431	4	0.335121	0.587761	-0.15179	0.624829	0.929827	FALSE	None
AXL	4	-0.350183	0.52862	4	0.178874	0.0405918	0.487311	0.124226	0.668885	FALSE	None
AZGP1	4	-0.394208	0.109863	4	-0.840759	0.108215	-0.365825	0.196348	0.745142	FALSE	None
AZI1	4	-0.492046	0.0899727	4	-0.783148	0.0547247	-0.196392	0.494804	0.894143	FALSE	None
AZI2	4	-0.269599	0.062602	4	0.218409	0.373866	0.437852	0.156161	0.699342	FALSE	None
AZIN1	4	-1.1923	0.080575	4	-0.402307	0.0180397	0.902363	0.00394514	0.18283	TRUE	Positive
AZU1	4	-0.36811	0.0798506	4	0.0126827	0.150325	0.37129	0.188504	0.739215	FALSE	None
B2M	4	-0.276847	0.211411	4	0.0664289	0.110623	0.31663	0.298038	0.812845	FALSE	None
B3GALNT1	4	-0.277329	0.215583	4	-0.177798	0.439549	0.0828654	0.763847	0.958866	FALSE	None
B3GALNT2	4	-0.477389	0.395207	4	-0.242755	0.00618159	0.265516	0.385179	0.858661	FALSE	None
B3GALT1	4	0.0492249	0.111877	4	0.501107	0.263754	0.297524	0.317039	0.820821	FALSE	None
B3GALT2	4	-0.17059	0.202928	4	0.391204	0.280564	0.467004	0.128517	0.676333	FALSE	None
B3GALT4	4	-0.797016	0.0850209	4	-0.809672	0.189242	0.0922141	0.752488	0.958027	FALSE	None
B3GALT5	4	-0.532822	0.158857	4	-0.361146	0.0778735	0.226128	0.432126	0.871768	FALSE	None
B3GALT6	NA	NA	NA	NA	NA	NA	NA	NA	NA	NA	None
B3GALTL	4	-0.11929	0.152895	4	-0.233156	0.0951683	-0.122635	0.672191	0.942553	FALSE	None
B3GAT1	4	0.0448491	0.210906	4	-0.0665523	0.0385827	-0.166397	0.574085	0.916198	FALSE	None
B3GAT2	4	-0.953045	1.18561	4	-0.492017	0.867929	0.483854	0.0930857	0.61848	FALSE	None
B3GAT3	4	-0.577515	0.990975	4	-0.616709	0.174733	0.0152607	0.963853	0.994689	FALSE	None
B3GNT1	4	-0.265492	0.0546493	4	-0.250769	0.914575	0.00931067	0.976355	0.99667	FALSE	None
B3GNT2	4	-0.207788	0.0434689	4	-0.00909838	0.400099	0.163889	0.564051	0.912246	FALSE	None
B3GNT3	4	0.127007	0.382585	4	0.0913698	0.0780211	-0.130355	0.663918	0.939695	FALSE	None
B3GNT4	3	-0.648204	0.157435	3	-0.615041	0.470845	0.118127	0.746137	0.956511	FALSE	None
B3GNT5	4	-0.0612512	0.571069	4	-0.0246682	0.134791	-0.0256717	0.932354	0.990634	FALSE	None
B3GNT6	4	0.00708436	0.794207	4	-0.538396	0.0847928	-0.547928	0.105203	0.637389	FALSE	None
B3GNT7	4	-0.270178	0.244401	4	-0.659691	0.334039	-0.357527	0.203878	0.752136	FALSE	None
B3GNT8	4	-0.260796	0.0221342	4	-0.735179	0.0713882	-0.403499	0.161824	0.705106	FALSE	None
B3GNT9	4	-0.186987	0.198184	4	0.0603396	0.1387	0.209968	0.507479	0.898846	FALSE	None
B3GNTL1	4	-0.144639	0.411805	4	-0.0463837	0.254826	0.0516872	0.855471	0.978031	FALSE	None
B4GALNT1	4	-0.243941	0.45713	4	0.138812	0.295322	0.320285	0.26572	0.79185	FALSE	None
B4GALNT2	4	0.0505386	0.0327577	4	-0.368407	0.0442765	-0.429732	0.14046	0.689903	FALSE	None
B4GALNT3	4	0.115472	0.127597	4	0.105048	0.0362134	-0.0992947	0.727158	0.952749	FALSE	None
B4GALNT4	4	-0.477998	0.230798	4	-0.257973	0.224165	0.239607	0.399376	0.860909	FALSE	None
B4GALT1	4	-0.537624	0.538855	4	-0.253045	1.07807	0.2923	0.420531	0.869887	FALSE	None
B4GALT2	4	-0.394931	0.912276	4	-0.041728	0.837545	0.285779	0.31626	0.820821	FALSE	None
B4GALT3	4	-0.181768	0.157287	4	0.0361884	0.278192	0.18206	0.557025	0.910373	FALSE	None
B4GALT4	4	0.00262898	0.425877	4	-0.60195	0.139821	-0.601226	0.0516699	0.518008	FALSE	None
B4GALT5	4	-0.534551	0.43682	4	-0.408683	0.572164	0.151525	0.615694	0.927423	FALSE	None
B4GALT6	4	-0.20044	0.449939	4	-0.149714	0.376835	0.0235975	0.935917	0.991167	FALSE	None
B4GALT7	4	-0.591567	0.355697	4	-0.366114	0.572159	0.255308	0.398758	0.860909	FALSE	None
B9D1	4	-0.443357	0.170324	4	-0.429059	0.539709	0.0411936	0.884548	0.981538	FALSE	None
B9D2	4	-0.242356	0.211356	4	-0.40437	0.379627	-0.146763	0.615754	0.927423	FALSE	None
BAALC	4	-0.477346	0.771849	4	-0.16346	0.158726	0.313534	0.32367	0.82433	FALSE	None
BAAT	4	-0.670287	0.735841	4	-0.913122	1.73394	-0.231584	0.424163	0.870983	FALSE	None
BABAM1	4	-0.701525	1.09461	4	-0.236456	0.903607	0.419388	0.152803	0.697263	FALSE	None
BACE1	4	-0.0802543	0.207895	4	-0.0283555	0.0971493	0.010865	0.970886	0.996566	FALSE	None
BACE2	4	0.0597218	0.0568953	4	-0.320202	0.153179	-0.40229	0.15842	0.702422	FALSE	None
BACH1	4	-0.249813	0.0384306	4	0.0882967	0.517435	0.298095	0.31947	0.820921	FALSE	None
BACH2	4	0.174209	0.154712	4	-0.0118492	0.260506	-0.275105	0.326395	0.824922	FALSE	None
BAD	4	-0.978545	1.66003	4	-0.847286	1.60921	0.129598	0.661271	0.938973	FALSE	None
BAG1	4	0.0307387	0.0843406	4	-0.0862745	0.696511	-0.167522	0.61734	0.927842	FALSE	None
BAG2	4	-0.314278	0.565836	4	-0.363358	0.0790793	-0.0341283	0.910502	0.986027	FALSE	None
BAG3	4	-0.170997	0.00858186	4	-0.0281576	0.609105	0.108737	0.725347	0.952749	FALSE	None
BAG4	4	-0.413709	0.17666	4	-0.660488	0.456364	-0.192856	0.525052	0.90329	FALSE	None
BAG5	4	0.185503	0.0954889	4	0.472176	0.0688004	0.128747	0.664538	0.939695	FALSE	None
BAG6	4	-1.14878	0.290159	4	-2.38895	2.79303	-1.16335	0.00805594	0.262852	TRUE	Negative
BAHD1	4	-0.674016	0.436054	4	-1.85095	0.637358	-1.07625	0.00121705	0.0909626	TRUE	Negative
BAI1	4	0.495451	0.260293	4	-0.228968	0.702582	-0.826219	0.0269859	0.427394	FALSE	None
BAI2	4	0.233732	0.462873	4	0.422011	0.0286704	0.0163237	0.957718	0.993623	FALSE	None
BAI3	4	-0.192785	0.772541	4	-0.136316	0.140381	0.0156843	0.959262	0.994079	FALSE	None
BAIAP2	4	-0.367937	0.620045	4	-0.562699	0.492039	-0.177476	0.553512	0.908939	FALSE	None
BAIAP2L1	4	-0.0801077	0.184788	4	-0.0688348	0.322597	-0.0351791	0.901139	0.984034	FALSE	None
BAIAP2L2	4	0.015182	0.281211	4	-0.302116	0.433272	-0.350111	0.230137	0.767793	FALSE	None
BAIAP3	4	-0.281442	0.0383271	4	0.114178	0.200361	0.362824	0.213068	0.758029	FALSE	None
BAK1	4	-0.125205	0.278298	4	-0.284274	0.618646	-0.16532	0.627647	0.931018	FALSE	None
BAMBI	4	0.452512	0.126813	4	0.37807	0.0458683	-0.275299	0.343767	0.836429	FALSE	None
BANF1	4	-3.13124	0.625087	4	-3.60353	0.0177272	-0.496116	0.110093	0.644555	FALSE	None
BANF2	4	-0.141345	0.299765	4	-0.120743	2.05603	-0.0881787	0.781253	0.963258	FALSE	None
BANK1	3	0.433567	0.0112833	3	0.145232	0.0943285	-0.43509	0.194646	0.745142	FALSE	None
BANP	3	-2.27338	2.87581	3	-2.12808	4.44271	0.131372	0.718914	0.951786	FALSE	None
BAP1	4	-2.81386	0.880769	4	-2.76289	1.11569	0.0723637	0.799506	0.965739	FALSE	None
BARD1	4	-1.5919	3.1194	4	-1.99536	1.13704	-0.379559	0.236236	0.773263	FALSE	None
BARHL1	4	-0.241831	0.184373	4	0.494841	0.317668	0.62926	0.0407441	0.489711	FALSE	None
BARHL2	4	-0.495276	0.247861	4	-0.0120563	0.0094137	0.494053	0.103639	0.634247	FALSE	None
BARX1	4	-0.353548	0.0553168	4	-0.276936	0.169869	0.10347	0.717111	0.951094	FALSE	None
BARX2	4	0.252883	0.0681098	4	0.206478	0.140825	-0.171994	0.558881	0.910481	FALSE	None
BASP1	4	-0.139923	0.0220415	4	-0.178439	0.122128	-0.0492936	0.859274	0.97879	FALSE	None
BATF	4	-0.46078	0.330925	4	-0.187222	0.232539	0.290687	0.341931	0.834353	FALSE	None
BATF2	4	-0.114663	0.297452	4	-0.229729	0.280314	-0.137213	0.630752	0.931816	FALSE	None
BATF3	4	0.19284	0.105472	4	0.458946	0.0117169	0.106967	0.709554	0.949727	FALSE	None
BAX	4	0.244721	0.131194	4	0.383692	0.105595	-0.0255153	0.928731	0.99024	FALSE	None
BAZ1A	4	0.0318811	0.0458153	4	0.0443309	0.0384766	-0.0536902	0.846508	0.976172	FALSE	None
BAZ1B	4	-0.626971	0.213272	4	2.31773	0.308876	2.47186	1.41835e-08	3.01134e-05	TRUE	Positive
BAZ2A	4	-0.129095	0.0270038	4	0.0722118	0.0848927	0.152382	0.584118	0.918322	FALSE	None
BAZ2B	4	0.162407	0.143072	4	0.395551	0.280668	0.0792865	0.790415	0.963931	FALSE	None
BBC3	4	0.120636	0.636305	4	0.199915	0.0438629	-0.0552836	0.860943	0.979146	FALSE	None
BBIP1	4	0.128214	0.108905	4	0.195094	0.297513	-0.0461746	0.869616	0.97935	FALSE	None
BBOX1	4	-0.162861	0.383133	4	-0.383132	0.139836	-0.204927	0.530611	0.904489	FALSE	None
BBS1	4	-0.0437719	0.406018	4	-0.478907	0.16533	-0.437157	0.13752	0.685612	FALSE	None
BBS10	4	0.0394564	0.0873606	4	-0.465516	0.41166	-0.513125	0.0801293	0.59581	FALSE	None
BBS12	4	0.101166	0.0360264	4	-0.122263	0.202272	-0.276185	0.344144	0.836846	FALSE	None
BBS2	4	0.103009	0.453229	4	0.236019	0.0836833	-0.00186256	0.995098	0.999079	FALSE	None
BBS4	4	-0.328961	0.559788	4	-0.627838	0.212928	-0.268525	0.368724	0.851917	FALSE	None
BBS5	4	0.182742	0.130505	4	-0.0423576	0.617427	-0.32206	0.263305	0.790869	FALSE	None
BBS7	4	-0.163461	0.0280528	4	-0.222136	0.109835	-0.0608647	0.830879	0.972515	FALSE	None
BBS9	4	-0.183638	0.329207	4	-0.14978	0.404238	0.0157831	0.960404	0.994079	FALSE	None
BBX	4	-0.0714158	0.127806	4	-0.691137	0.10214	-0.578805	0.0541075	0.522345	FALSE	None
BCAM	4	-0.257395	0.632776	4	-0.154277	0.735242	0.0484893	0.870473	0.97935	FALSE	None
BCAN	4	-0.449597	0.495425	4	0.0882823	0.260358	0.526578	0.127719	0.676001	FALSE	None
BCAP29	4	-0.265104	0.0319426	4	-0.390558	1.02366	-0.118413	0.704174	0.949306	FALSE	None
BCAP31	4	-0.0638885	0.0231626	4	0.755936	0.0463404	0.652396	0.0258223	0.420337	FALSE	None
BCAR1	4	-0.784159	0.217037	4	-0.800105	0.677787	0.0635088	0.829607	0.972227	FALSE	None
BCAR3	4	-0.242825	0.403894	4	0.201235	0.244944	0.387552	0.238477	0.774092	FALSE	None
BCAS1	4	0.0212396	0.157077	4	-0.191072	0.167265	-0.246917	0.404184	0.862628	FALSE	None
BCAS2	4	-1.1344	0.286906	4	-2.5574	0.133255	-1.32555	0.000195765	0.0268626	TRUE	Negative
BCAS3	3	0.0687977	0.076857	3	0.0581355	0.407678	-0.0949149	0.778191	0.962168	FALSE	None
BCAS4	4	-0.0699166	0.0698576	4	-0.0596182	0.37988	-0.0334701	0.907829	0.985488	FALSE	None
BCAT1	4	-0.155136	0.197408	4	-0.964322	0.41281	-0.759194	0.0111992	0.312228	TRUE	Negative
BCAT2	4	-0.357992	0.327418	4	-0.297456	0.564901	0.0545824	0.850131	0.977078	FALSE	None
BCCIP	4	-2.82106	2.59345	4	-2.17621	3.27449	0.63923	0.0318379	0.443458	FALSE	None
BCDIN3D	3	0.313721	0.0207189	3	0.493452	0.121912	-0.0140769	0.965652	0.995113	FALSE	None
BCHE	4	0.108178	0.116865	4	-0.455684	0.120031	-0.573195	0.0543859	0.523079	FALSE	None
BCKDHA	4	-0.286804	0.128127	4	-0.493769	0.613046	-0.166102	0.618415	0.927842	FALSE	None
BCKDHB	4	-0.2854	0.12299	4	0.0729716	0.665722	0.315092	0.287898	0.80476	FALSE	None
BCKDK	4	-0.221961	0.203997	4	-0.0879986	0.165232	0.121744	0.701283	0.948952	FALSE	None
BCL10	4	-0.135096	0.502021	4	-0.62833	0.0764588	-0.470864	0.125243	0.670662	FALSE	None
BCL11A	4	-0.0244338	0.230763	4	0.381294	0.294844	0.276486	0.332609	0.830176	FALSE	None
BCL11B	4	-0.535121	0.327651	4	0.249631	0.604513	0.733249	0.0157904	0.357383	TRUE	Positive
BCL2	4	-1.05374	0.0445424	4	-1.50951	0.366726	-0.336818	0.291193	0.808043	FALSE	None
BCL2A1	3	-0.130659	0.0501623	3	-0.460916	0.477975	-0.308227	0.398744	0.860909	FALSE	None
BCL2L1	4	-3.47663	0.308565	4	-2.78203	0.695625	0.695015	0.0305295	0.438833	FALSE	None
BCL2L10	4	-0.202674	0.409383	4	0.0138406	0.0284948	0.181608	0.544619	0.907728	FALSE	None
BCL2L11	4	-0.151626	0.664618	4	-0.00542201	0.352072	0.0860658	0.783109	0.96339	FALSE	None
BCL2L12	4	-0.380508	0.202144	4	-0.552034	0.547671	-0.144999	0.608525	0.926018	FALSE	None
BCL2L13	3	-0.183402	0.0509397	3	0.204977	0.27634	0.331078	0.34559	0.838179	FALSE	None
BCL2L14	4	-0.261267	0.680938	4	-0.0582858	0.296868	0.172665	0.595588	0.921737	FALSE	None
BCL2L15	4	-0.242295	0.115471	4	0.00561488	0.307444	0.223263	0.463491	0.88113	FALSE	None
BCL2L2	3	-0.456227	0.113891	3	-0.507056	0.014712	0.0139684	0.966175	0.995535	FALSE	None
BCL3	4	-0.215004	0.453108	4	0.00567891	0.607378	0.169707	0.585005	0.91834	FALSE	None
BCL6	4	0.0445262	0.0802886	4	-0.346451	0.213118	-0.408127	0.164311	0.708383	FALSE	None
BCL6B	4	-0.91975	0.751586	4	-0.639791	0.72374	0.329342	0.241201	0.776517	FALSE	None
BCL7A	4	0.161599	0.138207	4	-0.0238351	0.0187779	-0.260225	0.379587	0.857198	FALSE	None
BCL7B	4	0.00841859	0.454078	4	0.00536431	0.1654	-0.066525	0.839478	0.975231	FALSE	None
BCL7C	4	-0.211893	0.506811	4	-0.555804	1.8839	-0.391085	0.225657	0.766159	FALSE	None
BCL9	3	-0.254985	0.703059	3	0.375323	0.0556792	0.552204	0.16735	0.712833	FALSE	None
BCL9L	3	0.277987	0.0786783	3	0.578146	0.2224	0.102227	0.769462	0.960132	FALSE	None
BCLAF1	4	-2.02027	1.51483	4	-2.47237	1.46704	-0.406964	0.168011	0.714168	FALSE	None
BCMO1	3	0.281308	0.0580161	3	0.432463	0.37384	-0.0196608	0.955962	0.993111	FALSE	None
BCO2	4	-0.20513	0.419563	4	-0.375216	0.285541	-0.165833	0.56998	0.914626	FALSE	None
BCOR	4	0.32805	0.0613728	4	0.00120575	0.085903	-0.431759	0.140433	0.689903	FALSE	None
BCORL1	4	0.134056	0.0568076	4	0.979798	0.149929	0.571389	0.0490711	0.510079	FALSE	None
BCR	4	-0.0898901	0.282981	4	-0.0901638	0.344202	-0.0453578	0.876342	0.97935	FALSE	None
BCS1L	4	-3.50274	1.30206	4	-3.37596	1.15989	0.0867542	0.754057	0.958124	FALSE	None
BDH1	4	-0.0240585	0.0737439	4	0.428427	0.135105	0.338134	0.263529	0.791113	FALSE	None
BDH2	4	-0.374294	0.206857	4	-0.361427	0.477818	0.0410286	0.894846	0.982835	FALSE	None
BDKRB1	4	0.0517181	0.0905758	4	0.53613	0.458197	0.307568	0.296018	0.81107	FALSE	None
BDKRB2	4	-0.230143	1.67633	4	-0.427708	3.09326	-0.338329	0.237446	0.773309	FALSE	None
BDNF	4	-0.00211191	0.17371	4	0.302095	0.0885318	0.198111	0.499565	0.897443	FALSE	None
BDP1	3	-0.492522	2.43811	3	-0.722381	1.72998	-0.28718	0.398058	0.860909	FALSE	None
BEAN1	4	-0.119279	0.61256	4	-0.262832	0.740047	-0.203475	0.470215	0.88254	FALSE	None
BECN1	4	-0.621282	0.153226	4	-0.54331	0.58315	0.13599	0.65404	0.93774	FALSE	None
BEGAIN	4	-0.000154925	0.238483	4	0.227998	0.176418	0.124735	0.659323	0.938492	FALSE	None
BEND2	4	0.176823	0.128307	4	0.51526	1.25032	0.117187	0.713268	0.950896	FALSE	None
BEND3	4	-0.919854	1.03678	4	-0.129414	0.239933	0.810882	0.0138162	0.34223	TRUE	Positive
BEND4	4	0.0763072	0.597593	4	-0.122723	0.535079	-0.272311	0.407542	0.864822	FALSE	None
BEND5	4	0.129516	0.366863	4	0.0625134	0.33562	-0.16815	0.582684	0.917735	FALSE	None
BEND6	4	-0.743612	0.134928	4	-0.829106	0.20497	0.0168431	0.954752	0.993107	FALSE	None
BEND7	4	0.191004	0.396875	4	0.0285531	0.26333	-0.272319	0.369557	0.852391	FALSE	None
BEST1	4	-0.477941	0.203786	4	-0.85866	0.4388	-0.306489	0.309931	0.8169	FALSE	None
BEST2	4	0.0678038	0.403986	4	-0.513231	1.10598	-0.576471	0.173294	0.721879	FALSE	None
BEST3	4	-0.0990966	0.0623804	4	0.0656632	0.0272258	0.114288	0.690177	0.946676	FALSE	None
BEST4	4	0.0273342	0.0995768	4	0.250798	1.07525	0.104262	0.744588	0.956272	FALSE	None
BET1	3	-1.32212	0.276876	3	-0.853141	0.614092	0.567713	0.112626	0.652959	FALSE	None
BET1L	4	-0.253017	0.311592	4	0.465318	0.0197863	0.625813	0.0442646	0.496506	FALSE	None
BEX1	4	0.374483	0.337041	4	0.356334	0.227226	-0.203351	0.529893	0.904489	FALSE	None
BEX2	NA	NA	NA	NA	NA	NA	NA	NA	NA	NA	None
BEX4	4	-0.255086	0.405315	4	0.743726	0.511298	0.843303	0.0137313	0.341126	TRUE	Positive
BEX5	4	0.162138	0.225055	4	0.791858	0.694284	0.358573	0.220148	0.763413	FALSE	None
BFAR	4	-0.374386	0.189166	4	-0.360498	0.162877	0.0515894	0.863197	0.97935	FALSE	None
BFSP1	4	-0.0944836	0.266737	4	0.414302	1.40112	0.346548	0.286216	0.802411	FALSE	None
BFSP2	4	0.110108	0.0653537	4	0.355726	0.700017	0.0966451	0.752898	0.958027	FALSE	None
BGLAP	4	-0.376111	0.612314	4	-0.669289	0.322579	-0.255118	0.418448	0.868913	FALSE	None
BGN	4	-0.0730991	0.27218	4	0.625812	0.0930525	0.541553	0.0718964	0.576796	FALSE	None
BHLHA15	4	-0.513323	0.786996	4	-0.131844	1.86958	0.310565	0.30618	0.8169	FALSE	None
BHLHA9	4	-0.22835	0.0632163	4	0.126647	0.0845292	0.31442	0.277114	0.799216	FALSE	None
BHLHB9	4	0.101252	0.201377	4	0.658183	0.133693	0.356701	0.212154	0.757681	FALSE	None
BHLHE22	4	0.461115	0.151831	4	0.464056	0.532774	-0.214634	0.527292	0.904193	FALSE	None
BHLHE23	4	-0.0437202	0.0624792	4	-0.151145	0.304205	-0.140904	0.619121	0.928074	FALSE	None
BHLHE40	4	-0.00136805	0.21372	4	0.373005	1.49731	0.202309	0.512631	0.900565	FALSE	None
BHLHE41	4	0.0526945	0.433237	4	0.251011	0.0329484	0.0870591	0.773697	0.961002	FALSE	None
BHMT	4	-0.394895	0.129123	4	-0.544808	0.643434	-0.106092	0.743472	0.956272	FALSE	None
BHMT2	4	-0.505983	0.548295	4	-0.119217	0.104863	0.395467	0.19413	0.744216	FALSE	None
BICC1	4	-0.0499882	0.259352	4	-0.24134	0.340866	-0.207131	0.530121	0.904489	FALSE	None
BICD1	4	-0.439145	0.466465	4	-0.354083	0.169073	0.107308	0.716564	0.951094	FALSE	None
BICD2	4	-0.97796	2.33308	4	-1.91654	1.02653	-0.851149	0.0472423	0.50209	FALSE	None
BID	4	-0.83517	0.343647	4	-0.213072	0.179014	0.671441	0.0247057	0.412483	FALSE	None
BIK	4	0.473647	0.0478608	4	0.217977	0.154944	-0.427349	0.143376	0.690193	FALSE	None
BIN1	4	-0.104669	0.154442	4	-0.169819	0.23506	-0.0841423	0.78051	0.96306	FALSE	None
BIN2	3	-0.403764	0.608541	3	-0.386474	1.01692	0.016479	0.963934	0.994689	FALSE	None
BIN3	4	-0.0325262	0.12434	4	0.0884962	0.145308	0.0560983	0.846907	0.976414	FALSE	None
BIRC2	4	-0.132907	0.244834	4	-0.969773	0.392732	-0.767786	0.027988	0.433934	FALSE	None
BIRC3	4	-0.0580884	0.124865	4	-0.262219	0.11391	-0.21623	0.454113	0.878027	FALSE	None
BIRC5	4	-2.35361	0.024182	4	-3.2118	0.311355	-0.813	0.013159	0.335938	TRUE	Negative
BIRC6	4	-0.431879	0.168238	4	-2.2836	0.0754222	-1.73271	9.85209e-06	0.00298349	TRUE	Negative
BIRC7	4	-0.0895897	0.133489	4	-0.0430266	0.460748	-0.00103655	0.997147	0.999491	FALSE	None
BIRC8	4	-0.107805	0.299233	4	-0.112233	0.0750276	-0.0341682	0.907391	0.985488	FALSE	None
BIVM	4	0.125763	0.0447749	4	-0.105559	1.13043	-0.320154	0.301832	0.814741	FALSE	None
BLACE	4	0.202264	0.472826	4	-0.669987	0.548232	-0.899041	0.00613342	0.227995	TRUE	Negative
BLCAP	4	-0.102143	0.21407	4	0.451138	1.37254	0.378209	0.253688	0.785658	FALSE	None
BLID	4	0.308364	0.00849247	4	0.265224	0.144324	-0.190514	0.500403	0.897853	FALSE	None
BLK	4	-0.510371	1.91874	4	-0.673203	1.27011	-0.193746	0.501437	0.898223	FALSE	None
BLM	4	-1.1839	1.2725	4	-0.538264	0.56665	0.695589	0.0252308	0.415327	FALSE	None
BLMH	4	-0.594841	0.025949	4	0.173868	0.0204739	0.772417	0.0108204	0.306886	TRUE	Positive
BLNK	4	0.16271	0.0627312	4	0.272856	0.073605	-0.0161653	0.95343	0.993107	FALSE	None
BLOC1S1	4	-0.0622185	0.0936644	4	0.212745	0.0845345	0.198911	0.501906	0.898223	FALSE	None
BLOC1S2	4	-0.318777	0.136614	4	0.15701	0.108367	0.443204	0.149599	0.694835	FALSE	None
BLOC1S3	4	-0.0715049	0.157536	4	0.0244073	0.0998768	0.0476633	0.875462	0.97935	FALSE	None
BLOC1S4	4	-0.00567384	0.141344	4	0.0727993	0.304454	0.0142162	0.9643	0.994814	FALSE	None
BLOC1S5	4	-0.14238	0.390144	4	-0.394054	0.272841	-0.259638	0.365877	0.850147	FALSE	None
BLOC1S6	4	-0.0757328	0.236887	4	-0.181892	0.244859	-0.134243	0.643608	0.935627	FALSE	None
BLVRA	4	-0.0115233	0.104464	4	-0.324453	0.0997778	-0.324332	0.247303	0.781998	FALSE	None
BLVRB	4	-0.992575	0.818014	4	-0.427186	0.640567	0.62087	0.0753423	0.586758	FALSE	None
BLZF1	4	0.102904	0.149871	4	-0.225905	0.164928	-0.370847	0.204854	0.753693	FALSE	None
BMF	4	-0.100579	0.120975	4	0.146137	0.137816	0.184363	0.53808	0.906254	FALSE	None
BMI1	4	0.0679941	0.15284	4	0.115499	1.15892	-0.0853389	0.788345	0.96373	FALSE	None
BMP1	4	0.168805	0.152585	4	0.392994	0.681184	0.0589523	0.852184	0.977458	FALSE	None
BMP10	4	-0.0942931	0.14542	4	-0.28659	0.306647	-0.199108	0.51188	0.900228	FALSE	None
BMP15	4	0.338792	0.356775	4	0.786016	0.0294052	0.165895	0.587256	0.9188	FALSE	None
BMP2	4	-0.0866483	0.787619	4	0.457479	0.312318	0.36408	0.23685	0.773263	FALSE	None
BMP2K	4	-0.988471	3.38088	4	-0.224532	2.87724	0.649635	0.0324599	0.448211	FALSE	None
BMP3	4	-0.785853	2.15073	4	-0.950771	1.49975	-0.151866	0.605194	0.924932	FALSE	None
BMP4	4	0.0352679	0.418987	4	0.0440894	0.706411	-0.0662158	0.853383	0.977458	FALSE	None
BMP5	4	-0.274326	0.161315	4	-0.00299708	0.266329	0.249161	0.401832	0.862151	FALSE	None
BMP6	4	0.454898	0.232539	4	-0.370851	0.0848192	-0.900039	0.00522974	0.211936	TRUE	Negative
BMP7	4	0.0640525	0.250174	4	0.0664263	0.0218724	-0.0777762	0.790654	0.963931	FALSE	None
BMP8A	3	0.279387	0.396606	3	0.110195	0.12952	-0.295488	0.397003	0.860909	FALSE	None
BMP8B	NA	NA	NA	NA	NA	NA	NA	NA	NA	NA	None
BMPER	4	-0.100799	0.155225	4	-0.0234202	0.133279	0.0350598	0.899857	0.983392	FALSE	None
BMPR1A	4	-0.694319	1.19755	4	-0.990963	0.389963	-0.226961	0.498206	0.896751	FALSE	None
BMPR1B	3	-0.244492	0.150435	3	-0.143991	0.0538124	0.0993608	0.773707	0.961002	FALSE	None
BMPR2	3	0.0611652	0.127968	3	-0.146516	0.365484	-0.258604	0.436251	0.87214	FALSE	None
BMS1	4	-2.34833	0.0980144	4	-1.44466	0.663597	0.99522	0.00259632	0.14233	TRUE	Positive
BMX	NA	NA	NA	NA	NA	NA	NA	NA	NA	NA	None
BNC1	4	-0.363975	0.0654246	4	-0.417281	0.529673	-0.0193378	0.947414	0.992398	FALSE	None
BNC2	4	-0.488785	0.145943	4	-0.329685	0.282493	0.198216	0.494109	0.894143	FALSE	None
BNIP1	4	-1.95455	1.71711	4	-1.75167	0.628894	0.285363	0.382523	0.858661	FALSE	None
BNIP2	4	-0.0260715	0.0272576	4	-0.299498	0.236334	-0.284147	0.331533	0.829132	FALSE	None
BNIP3	4	-0.197089	0.550879	4	-0.320982	0.573011	-0.140617	0.659242	0.938492	FALSE	None
BNIP3L	4	-0.222436	0.1185	4	-0.516926	0.54397	-0.259237	0.429674	0.871768	FALSE	None
BNIPL	3	-0.347455	0.978795	3	-0.274205	0.183585	0.0642907	0.855157	0.977974	FALSE	None
BOC	4	-0.319538	0.631505	4	-0.317526	1.17741	-0.0468738	0.866156	0.97935	FALSE	None
BOD1	NA	NA	NA	NA	NA	NA	NA	NA	NA	NA	None
BOD1L1	4	-1.2058	4.25259	4	-1.70432	1.31184	-0.474599	0.236686	0.773263	FALSE	None
BOD1L2	4	-0.0734132	0.307298	4	-0.118754	0.053316	-0.0791935	0.783589	0.96339	FALSE	None
BOK	4	0.0488788	0.0595029	4	0.0309903	0.587741	-0.0890801	0.780109	0.962952	FALSE	None
BOLA1	4	-0.735514	0.0478323	4	-0.619656	0.412145	0.206125	0.508344	0.898846	FALSE	None
BOLA3	3	-1.81853	0.264016	3	-1.2038	0.0694238	0.724877	0.040166	0.488219	FALSE	None
BOLL	4	0.238301	0.185229	4	0.176444	0.388681	-0.193142	0.518452	0.902137	FALSE	None
BOP1	4	-2.64432	2.53705	4	-2.58036	2.55579	0.0792042	0.775283	0.961204	FALSE	None
BORA	3	-0.314097	1.14168	3	-1.60495	0.0724276	-1.18157	0.00744142	0.252319	TRUE	Negative
BPGM	4	0.00128176	0.0969862	4	-0.0958567	0.103951	-0.13876	0.639452	0.933858	FALSE	None
BPHL	4	0.132894	0.0111994	4	0.248436	0.115955	0.00185304	0.994736	0.999079	FALSE	None
BPI	4	0.0415381	0.103497	4	0.115372	0.124181	-0.00693075	0.980871	0.997107	FALSE	None
BPIFA1	4	-0.556295	0.18254	4	-0.63113	0.650091	-0.0299076	0.917494	0.987552	FALSE	None
BPIFA2	4	0.305668	0.0560491	4	0.322857	0.110187	-0.136169	0.641262	0.934903	FALSE	None
BPIFA3	4	-0.478006	0.21378	4	-0.0488181	0.313694	0.431059	0.143913	0.690193	FALSE	None
BPIFB1	4	-0.247702	0.246326	4	-0.46153	0.478886	-0.201565	0.474523	0.88444	FALSE	None
BPIFB2	4	-0.404365	0.209342	4	-0.514782	0.330896	-0.0654377	0.819179	0.969113	FALSE	None
BPIFB3	4	-0.361616	0.291255	4	-0.252025	0.424255	0.111294	0.694876	0.947548	FALSE	None
BPIFB4	4	-0.125146	0.539408	4	-0.517803	0.337732	-0.389927	0.201807	0.749809	FALSE	None
BPIFB6	4	-1.01025	0.307252	4	-0.726512	0.105617	0.382228	0.182751	0.731451	FALSE	None
BPIFC	4	0.0381622	0.00979546	4	-0.0924237	0.296985	-0.180798	0.536408	0.905608	FALSE	None
BPNT1	4	-0.633747	0.222712	4	-0.274218	0.309559	0.410035	0.201916	0.749809	FALSE	None
BPTF	4	-1.5248	0.63026	4	-1.62103	0.483243	0.00542076	0.986738	0.998365	FALSE	None
BRAF	4	-0.311735	0.029233	4	-0.540143	0.259955	-0.174017	0.563343	0.912045	FALSE	None
BRAP	4	-0.427788	0.256331	4	0.0709604	0.477654	0.46658	0.108364	0.641276	FALSE	None
BRAT1	4	-1.28359	1.03373	4	-1.57545	2.25576	-0.26454	0.390904	0.859195	FALSE	None
BRCA1	4	-1.98078	0.622188	4	-2.18019	1.42524	-0.12771	0.671986	0.942553	FALSE	None
BRCA2	4	-1.69408	1.41311	4	-2.22331	2.04214	-0.478923	0.186032	0.73467	FALSE	None
BRCC3	4	-0.460233	0.177001	4	-0.343734	0.185327	0.15026	0.589538	0.919351	FALSE	None
BRD1	4	-0.983057	0.142456	4	-2.22905	0.275233	-1.14007	0.000777821	0.066792	TRUE	Negative
BRD2	4	-1.26538	1.96721	4	-0.425703	0.764218	0.865863	0.00840188	0.268336	TRUE	Positive
BRD3	4	-0.238507	0.354486	4	-0.813948	0.433322	-0.537014	0.0720228	0.576796	FALSE	None
BRD4	4	-2.57064	0.332249	4	-2.72676	1.2312	-0.11269	0.74309	0.956272	FALSE	None
BRD7	4	0.0572106	0.289457	4	1.15697	0.23056	0.814533	0.0213919	0.394201	TRUE	Positive
BRD8	3	-2.06158	0.40341	3	-3.07796	0.105736	-0.962453	0.00796124	0.262852	TRUE	Negative
BRD9	4	-0.309473	0.0273015	4	0.580349	0.47937	0.783866	0.0151666	0.355	TRUE	Positive
BRDT	4	-0.263462	0.620455	4	-0.0894463	0.260698	0.163759	0.647693	0.936382	FALSE	None
BRE	4	-1.1628	0.475573	4	-0.442256	0.562703	0.785395	0.00932254	0.282213	TRUE	Positive
BRF1	4	-2.79082	1.31027	4	-2.34223	1.69625	0.488998	0.113031	0.65301	FALSE	None
BRF2	4	-2.36149	1.65122	4	-1.91871	2.19165	0.49481	0.0955888	0.621298	FALSE	None
BRI3	4	-0.526744	0.171547	4	-0.205186	0.940397	0.334521	0.276213	0.798454	FALSE	None
BRI3BP	4	-0.232041	0.338588	4	0.105866	0.162196	0.289024	0.324432	0.824551	FALSE	None
BRICD5	4	-0.435113	0.257282	4	-0.194219	1.14014	0.212386	0.460605	0.879819	FALSE	None
BRINP1	4	0.49004	0.0403839	4	0.252327	0.0348129	-0.414805	0.143768	0.690193	FALSE	None
BRINP2	4	-0.166833	0.0341236	4	-0.503894	0.339331	-0.306757	0.305803	0.8169	FALSE	None
BRINP3	4	0.101181	0.091065	4	0.0525136	0.755176	-0.144673	0.625082	0.929827	FALSE	None
BRIP1	4	-2.3579	0.0508165	4	-1.28324	0.177364	1.17375	0.000413441	0.0432243	TRUE	Positive
BRIX1	4	-2.75974	1.92646	4	-2.49564	1.59119	0.282398	0.322639	0.823898	FALSE	None
BRK1	4	-0.484205	0.6435	4	-1.02327	0.338411	-0.472884	0.116444	0.657362	FALSE	None
BRMS1	3	-1.00904	0.414983	3	-0.501017	0.376216	0.589732	0.103117	0.634157	FALSE	None
BRMS1L	4	-0.160986	0.0403599	4	-0.15274	0.25581	-0.00690003	0.980592	0.997107	FALSE	None
BROX	4	-0.198794	0.276627	4	0.151261	0.162799	0.293957	0.313683	0.819383	FALSE	None
BRPF1	4	-0.586915	0.425333	4	1.80188	0.86557	2.03228	2.31926e-06	0.000993547	TRUE	Positive
BRPF3	4	-0.0706184	0.32819	4	0.0731848	0.11085	0.0832885	0.783813	0.96339	FALSE	None
BRS3	4	0.0794289	0.0265577	4	0.441125	0.405375	0.221053	0.472834	0.883683	FALSE	None
BRSK1	4	0.173708	0.0784411	4	0.00331813	0.34047	-0.262248	0.374502	0.85418	FALSE	None
BRSK2	4	-0.0623384	0.0996223	4	0.0844089	0.100409	0.0890208	0.76561	0.959348	FALSE	None
BRWD1	4	0.475939	0.268187	4	0.273957	0.375432	-0.427435	0.14343	0.690193	FALSE	None
BRWD3	4	0.236519	0.181905	4	0.872307	0.0323683	0.381412	0.216517	0.76088	FALSE	None
BSCL2	4	-0.461286	0.162211	4	-0.592945	0.0606091	-0.0590107	0.83921	0.975231	FALSE	None
BSDC1	4	-0.0261922	0.551663	4	0.132399	0.0937108	0.0723979	0.812321	0.968383	FALSE	None
BSG	4	-1.08674	0.181849	4	-0.675468	0.552977	0.503807	0.0902769	0.617124	FALSE	None
BSN	4	0.0190748	0.190734	4	-0.073246	0.022446	-0.141625	0.622376	0.929141	FALSE	None
BSND	4	0.15076	0.50515	4	0.488541	0.10897	0.158854	0.609404	0.926018	FALSE	None
BSPH1	4	-0.31995	0.228096	4	-0.0790694	0.979715	0.198068	0.508055	0.898846	FALSE	None
BSPRY	4	-0.213269	0.302655	4	-0.00419025	0.441274	0.162057	0.577854	0.916925	FALSE	None
BST1	4	-0.509752	0.677826	4	-0.275966	0.978685	0.210841	0.468237	0.882416	FALSE	None
BST2	4	-0.00192411	0.133208	4	0.012825	0.128653	-0.0466858	0.869302	0.97935	FALSE	None
BSX	4	0.34263	0.157438	4	0.333769	0.0425114	-0.170763	0.56996	0.914626	FALSE	None
BTAF1	4	-2.58484	0.610665	4	-2.5185	0.438284	0.116737	0.728542	0.952749	FALSE	None
BTBD1	4	-0.436641	0.625654	4	-0.7231	0.0944405	-0.231527	0.455271	0.878047	FALSE	None
BTBD10	4	0.198616	0.463384	4	-0.182195	0.55028	-0.468309	0.136379	0.683977	FALSE	None
BTBD11	4	-0.0957916	0.520669	4	-0.815496	0.783172	-0.714956	0.0207323	0.391948	TRUE	Negative
BTBD16	4	-0.279457	0.34116	4	-0.175989	0.0765492	0.107098	0.732022	0.954063	FALSE	None
BTBD17	4	-0.339311	0.289849	4	-0.0650032	0.202363	0.273866	0.405522	0.863294	FALSE	None
BTBD18	4	-0.505285	0.0220712	4	-0.455854	1.51943	0.0727833	0.825369	0.971114	FALSE	None
BTBD19	4	0.31094	0.136069	4	0.394854	0.633652	-0.119728	0.679497	0.944872	FALSE	None
BTBD2	4	-0.0866062	0.0520924	4	0.426497	0.0667551	0.410008	0.166031	0.711322	FALSE	None
BTBD3	4	-0.0292274	0.279812	4	0.169489	0.119964	0.120636	0.697924	0.947824	FALSE	None
BTBD6	4	0.113134	0.0563656	4	-0.209724	0.163988	-0.364044	0.227037	0.766905	FALSE	None
BTBD7	4	-0.326777	0.783956	4	0.0147401	0.645961	0.254513	0.375177	0.85418	FALSE	None
BTBD8	4	-0.154286	0.985992	4	-0.560971	0.492296	-0.425171	0.178853	0.727338	FALSE	None
BTBD9	4	-0.108957	0.143809	4	-0.106406	0.24429	-0.0278342	0.922749	0.988863	FALSE	None
BTC	4	-0.199385	0.102589	4	0.0894273	0.505508	0.231848	0.411694	0.867224	FALSE	None
BTD	4	-0.385766	0.2857	4	0.15806	0.237569	0.508525	0.0936612	0.61848	FALSE	None
BTF3	NA	NA	NA	NA	NA	NA	NA	NA	NA	NA	None
BTF3L4	4	0.001401	0.134939	4	-0.136214	0.346719	-0.182623	0.524477	0.903129	FALSE	None
BTG1	4	0.0827771	0.0135985	4	-0.520376	0.480232	-0.601863	0.0586093	0.534799	FALSE	None
BTG2	4	0.489692	0.100297	4	0.265149	0.268572	-0.422686	0.148498	0.694835	FALSE	None
BTG3	4	-0.0540853	0.0830918	4	-0.570807	0.111553	-0.49104	0.0959699	0.621298	FALSE	None
BTG4	4	0.119555	0.137241	4	-0.395648	0.241505	-0.542481	0.0595945	0.537053	FALSE	None
BTK	4	-0.449754	0.455489	4	-0.0543962	0.801386	0.350621	0.217106	0.76088	FALSE	None
BTLA	4	-0.135621	0.270453	4	-0.280899	0.335647	-0.161342	0.568384	0.91412	FALSE	None
BTN1A1	4	-0.022125	0.0736141	4	-0.0329563	0.401866	-0.0690733	0.804459	0.966713	FALSE	None
BTN2A1	4	0.158288	0.308977	4	-0.280801	0.235346	-0.481103	0.143223	0.690193	FALSE	None
BTN2A2	4	-0.169177	0.274783	4	0.0404099	0.258938	0.159675	0.5785	0.916925	FALSE	None
BTN3A1	4	0.138027	0.0461215	4	0.00123925	0.122454	-0.212138	0.457877	0.878825	FALSE	None
BTN3A2	NA	NA	NA	NA	NA	NA	NA	NA	NA	NA	None
BTN3A3	4	0.239259	0.0734505	4	-0.0640055	0.223457	-0.391119	0.169554	0.716909	FALSE	None
BTNL3	4	-0.812013	1.00371	4	-0.282661	0.358093	0.556808	0.0840812	0.60401	FALSE	None
BTNL8	4	-0.00787649	0.152379	4	-0.171663	0.0318337	-0.196103	0.489626	0.892372	FALSE	None
BTNL9	4	-0.312656	0.8782	4	-0.0185778	0.491126	0.227022	0.430963	0.871768	FALSE	None
BTRC	4	0.440552	0.114553	4	0.70041	0.778036	-0.0586459	0.845472	0.975967	FALSE	None
BUB1	4	-1.96476	1.23146	4	-2.00682	1.10748	0.0340514	0.917837	0.987565	FALSE	None
BUB1B	4	-1.77422	1.03102	4	-1.14955	5.89823	0.612621	0.135862	0.683977	FALSE	None
BUB3	4	-3.05343	0.631576	4	-3.80725	0.131681	-0.780132	0.0152944	0.355548	TRUE	Negative
BUD13	NA	NA	NA	NA	NA	NA	NA	NA	NA	NA	None
BUD31	4	-3.23089	0.499728	4	-3.2741	0.76569	-0.0561409	0.870543	0.97935	FALSE	None
BVES	4	0.285243	0.131963	4	0.0779553	0.0379231	-0.315194	0.293532	0.808932	FALSE	None
BYSL	4	-2.606	1.74828	4	-2.44796	2.05378	0.189126	0.524287	0.903129	FALSE	None
BZRAP1	3	-0.0440423	0.047594	3	-0.176954	0.308496	-0.15654	0.657224	0.938363	FALSE	None
BZW1	4	-0.37323	0.245557	4	0.416484	0.603242	0.708791	0.0257121	0.41971	FALSE	None
BZW2	4	-0.0814984	0.262835	4	0.516849	0.70902	0.436708	0.132002	0.678712	FALSE	None
C10orf10	4	0.133041	0.041643	4	-0.142686	0.360347	-0.332464	0.268814	0.794475	FALSE	None
C10orf105	4	-0.778004	1.16735	4	-0.445136	1.07482	0.340684	0.288946	0.806201	FALSE	None
C10orf107	4	0.435098	0.104114	4	0.119895	0.365418	-0.474871	0.122012	0.666981	FALSE	None
C10orf11	4	-0.21472	0.750512	4	-0.173026	0.987244	-0.0315285	0.912726	0.986389	FALSE	None
C10orf111	4	0.184447	0.134786	4	0.202988	0.111771	-0.0913833	0.765605	0.959348	FALSE	None
C10orf113	4	-0.554807	0.487851	4	0.0389825	0.270175	0.588618	0.0730535	0.579022	FALSE	None
C10orf115	4	-0.219451	0.0415672	4	-0.259501	0.0503934	-0.028874	0.918236	0.987819	FALSE	None
C10orf118	4	0.507608	0.248744	4	0.584185	0.271735	-0.216901	0.442443	0.874194	FALSE	None
C10orf12	4	-0.0840717	0.0422033	4	0.393188	0.103244	0.376727	0.199963	0.747597	FALSE	None
C10orf120	4	0.0961209	0.00216853	4	0.0965299	0.168458	-0.0855527	0.761808	0.958844	FALSE	None
C10orf126	4	0.015104	0.483171	4	-0.226203	0.220733	-0.288621	0.32643	0.824922	FALSE	None
C10orf128	4	-0.276255	0.514561	4	-0.346212	0.093868	-0.051833	0.869852	0.97935	FALSE	None
C10orf129	4	0.03617	0.190724	4	-0.0370492	0.481847	-0.132607	0.689457	0.946676	FALSE	None
C10orf131	4	-0.0660049	0.0928113	4	0.0648046	0.283727	0.0680709	0.813829	0.968696	FALSE	None
C10orf137	4	-0.11322	0.165728	4	-0.593457	0.95656	-0.482294	0.126282	0.671839	FALSE	None
C10orf2	4	-2.90542	3.31517	4	-3.24625	1.40943	-0.332364	0.298559	0.812845	FALSE	None
C10orf25	3	0.199173	0.140541	3	-0.016045	0.132692	-0.299005	0.384884	0.858661	FALSE	None
C10orf32	4	-0.0417857	0.675617	4	0.632362	0.180963	0.489377	0.143374	0.690193	FALSE	None
C10orf35	4	0.0281684	0.467565	4	0.19582	0.15389	0.0677556	0.831902	0.972626	FALSE	None
C10orf40	4	-0.164663	0.341277	4	-0.0938975	0.296972	0.0439335	0.889911	0.982232	FALSE	None
C10orf53	4	-0.267831	0.295674	4	0.0583696	0.182211	0.299446	0.355877	0.845021	FALSE	None
C10orf54	4	-0.0856166	0.0906604	4	0.460321	0.150844	0.433129	0.153247	0.697546	FALSE	None
C10orf55	4	-0.36593	1.44902	4	-0.479972	2.15946	-0.189987	0.520229	0.902717	FALSE	None
C10orf62	4	0.139625	0.124562	4	0.138586	0.109729	-0.0999642	0.734013	0.954912	FALSE	None
C10orf67	4	-0.0179205	0.0497685	4	-0.0849419	0.10061	-0.108133	0.696616	0.947548	FALSE	None
C10orf68	4	0.213823	0.0250571	4	0.414677	0.272414	0.0360651	0.899277	0.983392	FALSE	None
C10orf71	4	-0.214754	0.245085	4	-0.415261	0.0441874	-0.178241	0.538261	0.906338	FALSE	None
C10orf76	4	-0.800823	0.171183	4	-1.08045	1.50556	-0.20379	0.52071	0.902784	FALSE	None
C10orf82	4	-0.161431	0.326429	4	-0.251902	0.164183	-0.0919209	0.771363	0.960314	FALSE	None
C10orf85	4	0.480116	0.277771	4	0.557209	1.08376	-0.207578	0.563177	0.912045	FALSE	None
C10orf88	4	0.0571528	0.0877345	4	-0.336498	1.10056	-0.444159	0.16069	0.704599	FALSE	None
C10orf90	4	-0.214014	0.650501	4	0.0568412	0.144694	0.215243	0.475766	0.885091	FALSE	None
C10orf91	4	-0.103515	0.0376116	4	-0.373429	0.394314	-0.269054	0.349553	0.83981	FALSE	None
C10orf95	4	-0.312202	0.131081	4	0.55691	0.0768784	0.773585	0.0111154	0.310382	TRUE	Positive
C10orf99	4	-0.133751	0.131351	4	-0.184724	0.0212123	-0.0631558	0.823724	0.970624	FALSE	None
C11orf1	4	0.08794	0.148882	4	-0.232898	0.551376	-0.373361	0.203283	0.751174	FALSE	None
C11orf16	4	0.325396	0.136831	4	-0.0599853	0.324171	-0.489506	0.102165	0.633255	FALSE	None
C11orf21	4	-0.188427	0.0862288	4	0.126014	0.669308	0.248627	0.387278	0.858661	FALSE	None
C11orf24	NA	NA	NA	NA	NA	NA	NA	NA	NA	NA	None
C11orf30	4	0.301785	0.293374	4	0.879392	1.08208	0.206225	0.499376	0.897395	FALSE	None
C11orf31	4	-0.101393	0.448545	4	0.158704	0.0844797	0.195349	0.55656	0.910289	FALSE	None
C11orf35	4	-0.266821	0.42615	4	-0.157227	0.42489	0.0875722	0.76685	0.959886	FALSE	None
C11orf40	4	0.259944	0.283097	4	-0.0837289	0.037018	-0.428411	0.165399	0.709767	FALSE	None
C11orf42	4	0.0923635	0.180795	4	0.370177	0.0313173	0.146691	0.61428	0.927043	FALSE	None
C11orf44	4	0.775613	0.168747	4	0.450525	0.229671	-0.644686	0.031892	0.44386	FALSE	None
C11orf45	4	0.135626	0.213745	4	-0.0396381	0.124362	-0.252384	0.373686	0.853903	FALSE	None
C11orf48	4	-0.0591254	0.283894	4	-0.712169	0.482562	-0.611244	0.0893655	0.616241	FALSE	None
C11orf49	4	-0.0253807	0.133325	4	-0.499549	0.26877	-0.463188	0.134673	0.683977	FALSE	None
C11orf52	4	-0.132995	0.152146	4	0.122791	0.0508872	0.200325	0.498784	0.89692	FALSE	None
C11orf53	4	0.264774	0.0166331	4	0.0716719	0.347644	-0.305785	0.300096	0.813669	FALSE	None
C11orf54	4	0.105225	0.0152415	4	0.0664914	0.205787	-0.119563	0.678664	0.944747	FALSE	None
C11orf57	4	-0.884618	1.57221	4	-0.860934	0.308942	0.0604767	0.850092	0.977078	FALSE	None
C11orf58	4	-0.362477	0.370384	4	0.308997	0.524424	0.592798	0.0468146	0.50209	FALSE	None
C11orf63	4	-0.24633	0.0937676	4	0.554581	0.316457	0.689635	0.0244066	0.410718	FALSE	None
C11orf65	4	0.015748	0.0166214	4	-0.477489	0.703902	-0.492928	0.129002	0.676333	FALSE	None
C11orf68	4	0.0638812	0.110389	4	0.184141	0.17298	0.0159935	0.954083	0.993107	FALSE	None
C11orf70	4	-0.0457119	0.26562	4	0.167395	0.14562	0.12949	0.6503	0.937165	FALSE	None
C11orf71	4	0.240727	0.13129	4	-0.142343	0.101181	-0.453214	0.139126	0.688315	FALSE	None
C11orf72	3	0.545056	0.00728781	3	0.647613	0.759398	-0.217275	0.525202	0.90329	FALSE	None
C11orf73	4	-0.488857	0.216052	4	-0.00474484	0.227416	0.484599	0.0911692	0.617801	FALSE	None
C11orf74	NA	NA	NA	NA	NA	NA	NA	NA	NA	NA	None
C11orf80	4	-0.570688	0.893488	4	-0.665047	0.326492	-0.0567149	0.847932	0.976794	FALSE	None
C11orf82	4	-0.299614	0.130218	4	-0.037556	0.0357341	0.252976	0.378452	0.857089	FALSE	None
C11orf83	4	-0.950776	1.80017	4	-0.508538	1.87335	0.400644	0.195929	0.745142	FALSE	None
C11orf84	4	-0.474277	0.287233	4	-0.532753	0.135762	-0.000346025	0.999059	0.999857	FALSE	None
C11orf85	4	0.219706	0.521679	4	-0.106794	0.303273	-0.440015	0.1538	0.697697	FALSE	None
C11orf86	4	-0.156608	0.400347	4	-0.0131133	0.0502938	0.108343	0.727607	0.952749	FALSE	None
C11orf87	4	-0.901472	0.859867	4	-1.16848	1.53445	-0.19535	0.528285	0.904489	FALSE	None
C11orf88	4	-0.108893	0.0793828	4	0.434667	0.586789	0.433023	0.186659	0.735853	FALSE	None
C11orf89	4	0.0713392	0.109324	4	0.00414948	0.38378	-0.142266	0.626494	0.930171	FALSE	None
C11orf91	4	0.0270935	0.096164	4	-0.86875	0.576243	-0.871882	0.00613354	0.227995	TRUE	Negative
C11orf94	4	-0.178913	0.20043	4	-0.169763	0.0280717	-9.12503e-06	0.999975	0.999997	FALSE	None
C11orf96	4	-0.0135679	1.3119	4	0.00109035	0.517218	-0.104307	0.754137	0.958124	FALSE	None
C12orf10	4	-0.474873	0.426171	4	-0.941285	0.470263	-0.388271	0.247502	0.781998	FALSE	None
C12orf23	4	-0.127298	0.252278	4	-0.400568	0.26073	-0.277342	0.337013	0.830961	FALSE	None
C12orf29	4	0.240185	0.364367	4	-0.729793	0.2221	-0.974897	0.00360386	0.172946	TRUE	Negative
C12orf36	4	-0.573264	1.03239	4	0.111153	0.519804	0.626678	0.038241	0.479378	FALSE	None
C12orf39	4	-0.385171	0.177827	4	-0.585667	0.306255	-0.158978	0.565249	0.913259	FALSE	None
C12orf4	4	0.0705685	0.72782	4	0.154393	0.39026	-0.0504261	0.869883	0.97935	FALSE	None
C12orf40	4	-0.297943	0.112205	4	-0.138535	0.382763	0.157696	0.597183	0.922197	FALSE	None
C12orf42	4	0.276927	0.0594287	4	0.00813866	0.49697	-0.36981	0.252329	0.785241	FALSE	None
C12orf43	NA	NA	NA	NA	NA	NA	NA	NA	NA	NA	None
C12orf44	4	-1.36486	0.23947	4	-1.29288	2.65917	0.124851	0.717764	0.951427	FALSE	None
C12orf45	4	-2.61356	1.62775	4	-2.28376	1.32008	0.372828	0.258564	0.78769	FALSE	None
C12orf49	4	0.0167666	0.106943	4	-0.117769	0.477084	-0.187828	0.518033	0.902135	FALSE	None
C12orf5	4	0.010624	0.0529427	4	0.583513	0.077236	0.422535	0.144437	0.690872	FALSE	None
C12orf50	4	0.143299	0.0261787	4	0.325029	0.320005	0.0369018	0.894924	0.982835	FALSE	None
C12orf52	4	-0.287705	0.0807967	4	-0.171868	0.187237	0.120932	0.677967	0.944633	FALSE	None
C12orf54	4	0.0296157	0.414601	4	-0.0268596	0.327171	-0.131121	0.659006	0.938492	FALSE	None
C12orf55	4	0.0807762	0.483788	4	0.147255	1.17024	-0.120563	0.6788	0.944747	FALSE	None
C12orf56	4	-0.646901	0.10109	4	-0.446524	0.376344	0.260928	0.379718	0.857224	FALSE	None
C12orf57	4	-0.262889	0.570249	4	0.169758	0.230136	0.3658	0.225487	0.766	FALSE	None
C12orf60	4	-0.236668	0.547088	4	0.163726	0.271502	0.343741	0.309892	0.8169	FALSE	None
C12orf61	4	0.256349	0.043502	4	0.714343	0.107819	0.234118	0.418625	0.868988	FALSE	None
C12orf65	4	-2.1611	0.59355	4	-2.3177	0.302727	-0.085967	0.761656	0.958844	FALSE	None
C12orf66	4	-0.108141	3.3695	4	-1.03362	0.319794	-0.947002	0.025523	0.417401	FALSE	None
C12orf68	4	-0.230365	0.0401037	4	-0.723509	0.299671	-0.440874	0.131086	0.67837	FALSE	None
C12orf71	4	-0.155988	0.501415	4	0.0151671	0.562565	0.10111	0.722591	0.952495	FALSE	None
C12orf73	4	-0.0952483	0.0896125	4	-0.186976	0.106166	-0.108833	0.696914	0.947548	FALSE	None
C12orf74	4	-0.0502411	0.0618982	4	-0.544765	0.527285	-0.48356	0.124091	0.668366	FALSE	None
C12orf75	4	0.0806661	0.228879	4	0.0411691	0.0938503	-0.121379	0.674922	0.943366	FALSE	None
C12orf76	4	-0.0874895	0.0926533	4	-0.355109	0.234958	-0.269621	0.336141	0.830764	FALSE	None
C12orf77	3	-0.0203897	0.00815102	3	-0.248566	0.296249	-0.246626	0.463444	0.88113	FALSE	None
C13orf35	4	0.00933987	0.193998	4	-0.167377	0.212541	-0.218616	0.434406	0.871768	FALSE	None
C14orf1	4	-0.162147	0.888986	4	0.437791	0.692318	0.399286	0.187023	0.736767	FALSE	None
C14orf105	4	0.127294	0.318915	4	0.0857104	0.0617659	-0.13088	0.674289	0.943076	FALSE	None
C14orf119	4	-0.209404	0.121267	4	0.0598295	0.49057	0.22379	0.444002	0.874407	FALSE	None
C14orf132	4	0.209866	0.0965336	4	-0.196492	0.639991	-0.480163	0.11517	0.656013	FALSE	None
C14orf142	3	-0.191295	0.745065	3	-0.0890545	0.0960822	0.0689732	0.844628	0.975967	FALSE	None
C14orf159	4	-0.404423	0.122364	4	0.438699	0.0925056	0.779988	0.0103722	0.299195	TRUE	Positive
C14orf164	4	-0.122728	0.0366174	4	-0.617233	0.471995	-0.465039	0.12304	0.667171	FALSE	None
C14orf166	4	-1.56982	1.69069	4	-1.84046	1.38429	-0.194667	0.50167	0.898223	FALSE	None
C14orf166B	4	-0.203238	0.0234146	4	-0.0118478	0.171276	0.166539	0.558214	0.910481	FALSE	None
C14orf177	4	0.311151	0.286103	4	0.397926	0.099233	-0.100923	0.725062	0.952749	FALSE	None
C14orf178	4	-0.221753	0.260431	4	-0.0226768	0.266051	0.163628	0.55657	0.910289	FALSE	None
C14orf180	4	0.412276	0.0638371	4	0.00425585	0.030519	-0.528703	0.0677742	0.567391	FALSE	None
C14orf182	4	-0.244977	0.268192	4	-0.136146	0.52677	0.0820101	0.775197	0.961204	FALSE	None
C14orf183	4	-0.0955297	0.229234	4	-0.0839759	0.0155846	-0.0186433	0.949717	0.99267	FALSE	None
C14orf2	NA	NA	NA	NA	NA	NA	NA	NA	NA	NA	None
C14orf23	4	-0.154178	0.458361	4	0.193007	0.264221	0.269347	0.379352	0.857198	FALSE	None
C14orf28	4	-0.609651	0.0539279	4	-0.264779	0.173134	0.400577	0.178151	0.727225	FALSE	None
C14orf37	4	0.148656	0.260848	4	0.263717	0.143934	-0.0185256	0.947624	0.992398	FALSE	None
C14orf39	4	0.231138	0.0404343	4	0.284211	0.392808	-0.0867867	0.775618	0.961204	FALSE	None
C14orf79	3	0.0366869	0.05605	3	0.398324	0.0110275	0.240329	0.466112	0.882106	FALSE	None
C14orf80	4	-3.15712	0.915818	4	-3.31451	0.294107	-0.171146	0.556249	0.910102	FALSE	None
C14orf93	4	-0.424991	0.0536506	4	-0.882317	0.228367	-0.36805	0.216738	0.76088	FALSE	None
C15orf26	4	-0.400525	0.594033	4	-0.323555	0.348932	0.0804802	0.79181	0.963931	FALSE	None
C15orf27	4	-1.02654	0.209632	4	-0.442376	0.180798	0.674352	0.0283297	0.433934	FALSE	None
C15orf32	3	-0.105875	0.551705	3	-0.392688	0.198963	-0.278627	0.471621	0.882907	FALSE	None
C15orf37	4	-0.472105	0.385514	4	-1.01347	0.634094	-0.474598	0.127972	0.676001	FALSE	None
C15orf38	NA	NA	NA	NA	NA	NA	NA	NA	NA	NA	None
C15orf39	4	-0.500665	2.56083	4	-0.627824	2.46837	-0.207532	0.489586	0.892372	FALSE	None
C15orf40	4	-1.04348	0.32704	4	-1.10813	1.65138	0.0234714	0.940641	0.991496	FALSE	None
C15orf41	4	-2.38293	2.01538	4	-2.04259	1.83287	0.368336	0.221392	0.763425	FALSE	None
C15orf43	4	0.0841336	0.0319324	4	-0.0533485	0.28244	-0.19962	0.505514	0.898846	FALSE	None
C15orf48	4	0.382014	0.129077	4	0.132364	0.374308	-0.413172	0.155906	0.699342	FALSE	None
C15orf52	4	-0.204882	0.0837801	4	0.0945153	0.0778953	0.260213	0.373494	0.85384	FALSE	None
C15orf53	4	-0.347762	0.143351	4	-0.350097	0.175889	0.0238777	0.932168	0.990634	FALSE	None
C15orf54	4	-0.156032	0.0491649	4	-0.321244	0.180797	-0.159042	0.569919	0.914626	FALSE	None
C15orf56	4	-0.356747	0.593972	4	-0.345934	0.143511	0.0229699	0.938039	0.991245	FALSE	None
C15orf57	4	-0.545055	0.602177	4	-1.11092	1.71461	-0.522516	0.108295	0.641082	FALSE	None
C15orf59	4	-0.335125	0.0181598	4	-0.936552	0.52765	-0.525886	0.0918403	0.617801	FALSE	None
C15orf60	4	0.015537	0.17077	4	-0.957218	0.295499	-0.918642	0.00558523	0.217029	TRUE	Negative
C15orf61	4	0.303866	0.264477	4	-0.191737	0.331967	-0.569853	0.0884912	0.614538	FALSE	None
C15orf62	4	-0.18859	0.374514	4	0.349909	0.679996	0.417516	0.149053	0.694835	FALSE	None
C16orf11	4	-0.515393	0.225418	4	-0.886069	0.117167	-0.272989	0.37527	0.85418	FALSE	None
C16orf13	4	-0.978383	1.36478	4	-0.905965	1.02863	0.123653	0.686664	0.946135	FALSE	None
C16orf3	4	0.0449546	0.272232	4	-0.242218	0.971678	-0.35337	0.24226	0.77709	FALSE	None
C16orf45	4	-0.112366	0.557255	4	0.111786	0.188018	0.165298	0.63667	0.932923	FALSE	None
C16orf46	4	-0.0296574	0.0841918	4	-0.0784967	0.799139	-0.0934018	0.785404	0.96339	FALSE	None
C16orf47	4	0.0764006	0.133267	4	0.221066	0.124954	0.0377253	0.894616	0.982835	FALSE	None
C16orf52	4	-0.175455	0.202042	4	-0.922019	0.175887	-0.685672	0.0208744	0.391948	TRUE	Negative
C16orf54	4	-0.677298	3.92186	4	-1.16815	2.36626	-0.533827	0.105603	0.638267	FALSE	None
C16orf58	4	-0.0045831	0.0607937	4	-0.503244	0.869287	-0.500175	0.123129	0.667171	FALSE	None
C16orf59	4	-1.38889	0.348055	4	-1.59949	2.24066	-0.133718	0.68484	0.946135	FALSE	None
C16orf62	4	-0.259849	0.200578	4	-0.439242	0.368565	-0.161524	0.561702	0.911407	FALSE	None
C16orf70	4	0.0706901	0.628525	4	-0.228111	0.421742	-0.369393	0.216447	0.76088	FALSE	None
C16orf71	4	-0.496507	0.635456	4	-0.892589	1.04758	-0.37459	0.186128	0.73467	FALSE	None
C16orf72	3	-0.655965	0.644427	3	-1.66689	0.705137	-0.913172	0.0106841	0.30513	TRUE	Negative
C16orf74	4	-0.197658	0.829998	4	0.136879	0.387202	0.242011	0.429149	0.871768	FALSE	None
C16orf78	4	-0.289709	0.846603	4	-0.367907	0.0699703	-0.0787503	0.80031	0.96576	FALSE	None
C16orf80	4	-2.86474	2.59326	4	-3.48378	0.435789	-0.624682	0.0707284	0.573108	FALSE	None
C16orf86	4	-0.406892	0.198853	4	-0.354798	0.294306	0.0846132	0.775792	0.961204	FALSE	None
C16orf87	4	0.274903	0.0567274	4	0.101539	0.229075	-0.293751	0.309541	0.8169	FALSE	None
C16orf89	4	-0.66266	0.122671	4	-1.13528	0.551635	-0.369238	0.25007	0.783486	FALSE	None
C16orf90	4	-0.72147	0.0188502	4	-0.62101	0.098876	0.200787	0.482786	0.888306	FALSE	None
C16orf91	4	-0.231374	0.150621	4	-0.404955	0.715532	-0.15381	0.655147	0.93774	FALSE	None
C16orf92	4	0.0418131	0.18921	4	-0.124971	0.251511	-0.223239	0.423679	0.870983	FALSE	None
C16orf93	4	-0.375008	0.0791201	4	-0.485599	0.246979	-0.0552015	0.856183	0.978289	FALSE	None
C16orf95	4	-0.0093745	0.0694428	4	-0.115549	0.0402135	-0.143634	0.617466	0.927842	FALSE	None
C16orf96	4	-0.678625	1.59008	4	-0.7126	1.33519	-0.0355055	0.903053	0.984872	FALSE	None
C16orf97	4	-0.22398	0.375308	4	-0.485477	0.387981	-0.255548	0.376993	0.855889	FALSE	None
C16orf98	NA	NA	NA	NA	NA	NA	NA	NA	NA	NA	None
C17orf100	4	-0.553061	0.160809	4	-0.268497	0.190553	0.332485	0.275556	0.798295	FALSE	None
C17orf102	4	0.229951	0.00109326	4	0.188533	0.526851	-0.172636	0.563111	0.912045	FALSE	None
C17orf104	4	-0.173684	0.353188	4	-0.553174	0.0752614	-0.34884	0.254544	0.785658	FALSE	None
C17orf105	4	-0.449226	0.026585	4	0.0809049	0.491544	0.521631	0.104348	0.635263	FALSE	None
C17orf107	4	-0.379662	0.0523596	4	-0.0720166	0.285421	0.308291	0.277046	0.799216	FALSE	None
C17orf112	4	-0.258163	0.0193106	4	-0.197825	0.12459	0.0653605	0.814334	0.968856	FALSE	None
C17orf47	4	-0.276874	0.0890851	4	-0.510894	0.0303693	-0.183541	0.529176	0.904489	FALSE	None
C17orf49	NA	NA	NA	NA	NA	NA	NA	NA	NA	NA	None
C17orf50	4	-0.285106	0.0961781	4	-0.524055	0.0872432	-0.19431	0.484367	0.888532	FALSE	None
C17orf51	4	0.0699132	0.0878076	4	-0.087859	0.0466458	-0.210446	0.469142	0.88254	FALSE	None
C17orf53	4	-1.08553	0.0631777	4	-0.612633	0.15224	0.578398	0.0469228	0.50209	FALSE	None
C17orf58	4	0.0480031	0.143466	4	-0.38525	0.254043	-0.45292	0.114971	0.655991	FALSE	None
C17orf59	4	-0.550436	0.203644	4	0.0626007	0.0403706	0.622196	0.0424155	0.490633	FALSE	None
C17orf62	4	0.0102368	0.0182539	4	-0.44403	0.253639	-0.455799	0.117013	0.657459	FALSE	None
C17orf64	4	0.447534	0.032327	4	0.28227	0.0371238	-0.338675	0.229487	0.767261	FALSE	None
C17orf66	4	-0.332592	0.553396	4	-0.224582	0.326196	0.11441	0.727485	0.952749	FALSE	None
C17orf67	4	0.0552875	0.670702	4	-0.059689	0.16668	-0.190281	0.566414	0.913934	FALSE	None
C17orf70	4	-2.04521	0.226306	4	-1.24186	0.273493	0.908947	0.00652545	0.232797	TRUE	Positive
C17orf72	4	-0.0934468	0.311992	4	-0.61612	0.438724	-0.49264	0.137404	0.685418	FALSE	None
C17orf74	4	-0.303398	0.429107	4	-0.170068	0.130357	0.127899	0.672882	0.942553	FALSE	None
C17orf75	4	-0.791353	0.0137465	4	-0.230244	0.595748	0.618683	0.058644	0.534799	FALSE	None
C17orf77	4	-0.172912	0.138843	4	-0.361357	0.0773674	-0.175426	0.535247	0.905604	FALSE	None
C17orf78	4	0.275236	0.446377	4	0.106717	0.288584	-0.330185	0.256225	0.786151	FALSE	None
C17orf80	4	-0.031395	0.0880973	4	0.222351	0.43299	0.15321	0.589185	0.91929	FALSE	None
C17orf82	4	-0.806561	2.49565	4	-0.963131	1.88778	-0.17074	0.553842	0.909002	FALSE	None
C17orf85	4	-0.306059	0.384796	4	-0.705753	0.110605	-0.343494	0.269805	0.794951	FALSE	None
C17orf89	4	-2.29782	0.994603	4	-1.70598	1.39238	0.661285	0.033559	0.456529	FALSE	None
C17orf96	4	-0.280646	0.476024	4	-0.709254	0.363245	-0.359369	0.329283	0.827494	FALSE	None
C17orf97	4	-0.459068	0.281266	4	-0.524683	0.844745	-0.0439857	0.877795	0.979828	FALSE	None
C17orf98	3	0.112988	0.661555	3	-0.570773	0.508981	-0.717613	0.0398243	0.486084	FALSE	None
C17orf99	4	-0.0751423	0.844389	4	-0.0464405	0.87523	-0.0823063	0.770851	0.960297	FALSE	None
C18orf21	4	-2.78522	2.25419	4	-2.64861	1.81829	0.158036	0.572902	0.916198	FALSE	None
C18orf25	4	0.0368326	0.0310143	4	-0.249615	0.246022	-0.312755	0.290747	0.807474	FALSE	None
C18orf42	4	0.411937	0.26682	4	0.41902	0.192373	-0.214966	0.473808	0.883955	FALSE	None
C18orf54	4	0.219428	0.147682	4	0.147669	0.0562379	-0.185351	0.517714	0.902135	FALSE	None
C18orf63	4	0.413602	0.236689	4	-0.0296485	0.0467918	-0.563197	0.0604103	0.539982	FALSE	None
C18orf8	4	0.0890281	0.0486006	4	-0.646152	0.150079	-0.720907	0.0158382	0.357383	TRUE	Negative
C19orf10	4	-0.0747156	0.0966552	4	-0.288853	0.0901195	-0.218628	0.461072	0.87996	FALSE	None
C19orf12	4	-0.11858	0.070814	4	0.0310288	1.16088	0.0908258	0.786951	0.96339	FALSE	None
C19orf18	4	-0.226314	0.180025	4	-0.189312	0.58822	0.0181695	0.95032	0.99273	FALSE	None
C19orf24	4	-0.316904	0.0310931	4	-0.193806	0.102434	0.13639	0.623025	0.929141	FALSE	None
C19orf25	4	-0.797721	1.77538	4	-0.968058	1.99971	-0.157819	0.590547	0.919618	FALSE	None
C19orf26	4	-0.62156	0.963636	4	-0.198299	0.171924	0.430548	0.173652	0.722236	FALSE	None
C19orf33	4	0.129497	0.0239364	4	0.476713	0.311352	0.181861	0.52602	0.903836	FALSE	None
C19orf35	4	0.207145	0.102927	4	-0.142865	0.0260411	-0.413995	0.163768	0.707953	FALSE	None
C19orf38	4	-0.0670035	0.706819	4	-0.569876	0.152102	-0.507143	0.102562	0.63367	FALSE	None
C19orf40	4	-2.56815	0.14971	4	-2.01904	0.620822	0.617178	0.0540694	0.522345	FALSE	None
C19orf43	4	-2.02328	0.623536	4	-0.83172	0.159394	1.30062	0.000256851	0.0294858	TRUE	Positive
C19orf44	4	-0.446766	0.171957	4	-0.276875	0.064095	0.206537	0.480788	0.887146	FALSE	None
C19orf45	4	-0.222765	0.334607	4	-0.511824	0.065711	-0.253811	0.411479	0.867224	FALSE	None
C19orf47	4	-0.108546	0.148691	4	-0.293926	0.207896	-0.197066	0.48163	0.887855	FALSE	None
C19orf48	4	0.0582455	0.351123	4	0.16287	0.407839	-0.0137452	0.960841	0.994104	FALSE	None
C19orf52	4	-1.46981	0.331835	4	-1.32988	0.590515	0.245979	0.439902	0.872525	FALSE	None
C19orf53	4	-1.99867	0.527044	4	-2.22215	2.14609	-0.152259	0.648884	0.936868	FALSE	None
C19orf54	4	-0.474266	0.11904	4	0.0713791	0.13908	0.544901	0.0771884	0.589782	FALSE	None
C19orf55	4	-0.398619	0.396486	4	-1.01436	0.824836	-0.568989	0.0527167	0.520177	FALSE	None
C19orf57	4	0.0953899	1.19011	4	-0.0377034	0.130113	-0.238026	0.467599	0.882416	FALSE	None
C19orf59	4	-1.10613	1.43715	4	-1.23387	1.18261	-0.085875	0.757715	0.958528	FALSE	None
C19orf60	4	-0.667607	0.94387	4	-0.588038	1.59496	0.0628989	0.821657	0.969994	FALSE	None
C19orf66	4	-0.016415	0.178023	4	-0.295001	0.0315291	-0.291816	0.317017	0.820821	FALSE	None
C19orf67	4	0.279768	0.21741	4	-0.0155045	0.137166	-0.407298	0.163381	0.707674	FALSE	None
C19orf68	4	-0.0279278	0.184878	4	-0.182012	0.402689	-0.193081	0.496916	0.895371	FALSE	None
C19orf70	4	-0.753387	0.369971	4	-0.80998	0.421236	0.0287152	0.929537	0.990559	FALSE	None
C19orf71	4	-0.149329	0.159807	4	0.227397	0.072615	0.307437	0.295571	0.81065	FALSE	None
C19orf73	4	0.181459	0.111757	4	0.294275	0.951554	-0.0623171	0.843161	0.975967	FALSE	None
C19orf77	4	-0.501097	0.955792	4	-0.221954	0.323954	0.265055	0.378218	0.857052	FALSE	None
C19orf80	4	-0.403759	0.227231	4	-0.178039	0.17342	0.245056	0.415578	0.867224	FALSE	None
C19orf81	4	-0.206863	0.357998	4	-0.378414	0.498624	-0.154194	0.656754	0.938161	FALSE	None
C1D	NA	NA	NA	NA	NA	NA	NA	NA	NA	NA	None
C1GALT1	4	0.22157	0.458187	4	-0.208968	0.538122	-0.514804	0.11047	0.645905	FALSE	None
C1GALT1C1	4	0.578974	0.0135413	4	0.26275	0.0981715	-0.511677	0.0818717	0.600719	FALSE	None
C1orf100	4	0.144847	0.011999	4	0.0697594	0.357635	-0.167998	0.558642	0.910481	FALSE	None
C1orf101	4	0.12175	0.294348	4	-0.041474	0.447461	-0.236612	0.471582	0.882907	FALSE	None
C1orf105	4	-0.0817766	0.0210177	4	-0.0219552	0.32177	0.0137795	0.96136	0.994135	FALSE	None
C1orf106	4	-0.387031	0.499061	4	-0.229794	0.0164755	0.178972	0.569214	0.914626	FALSE	None
C1orf109	4	-2.28335	3.03473	4	-1.92053	2.99033	0.338076	0.278091	0.799357	FALSE	None
C1orf110	4	0.203631	0.224355	4	0.10004	0.469196	-0.203576	0.559552	0.910481	FALSE	None
C1orf111	4	-0.405705	0.261725	4	-0.180056	0.0945227	0.240119	0.398731	0.860909	FALSE	None
C1orf112	4	-1.00876	0.0868506	4	-0.34687	0.37857	0.740949	0.0178219	0.378107	TRUE	Positive
C1orf115	4	0.167224	0.123989	4	2.57077	0.398572	1.55094	4.49733e-05	0.00889995	TRUE	Positive
C1orf116	4	0.152925	0.259546	4	0.424454	0.247994	0.105052	0.713244	0.950896	FALSE	None
C1orf122	4	-0.213155	0.17538	4	-0.625868	0.16115	-0.374852	0.191736	0.7421	FALSE	None
C1orf123	3	-0.434441	0.211499	3	-0.583161	0.293864	-0.104423	0.748874	0.957712	FALSE	None
C1orf131	4	-1.19979	1.96287	4	-0.945763	1.38303	0.303795	0.316415	0.820821	FALSE	None
C1orf137	4	-0.109862	0.156078	4	-0.0366588	0.381375	0.0221498	0.936749	0.991167	FALSE	None
C1orf141	4	-0.388954	0.659269	4	-0.435076	0.327338	-0.00572326	0.987004	0.998365	FALSE	None
C1orf145	NA	NA	NA	NA	NA	NA	NA	NA	NA	NA	None
C1orf146	NA	NA	NA	NA	NA	NA	NA	NA	NA	NA	None
C1orf147	4	-0.165584	0.355699	4	-0.352153	0.478919	-0.19829	0.484366	0.888532	FALSE	None
C1orf158	4	0.0468153	0.340849	4	-0.185071	0.0882557	-0.269148	0.387238	0.858661	FALSE	None
C1orf159	4	-0.0370936	0.0643256	4	-0.369819	0.0425597	-0.331488	0.254524	0.785658	FALSE	None
C1orf162	4	0.0343691	0.150238	4	0.253529	0.12251	0.111898	0.698082	0.947824	FALSE	None
C1orf168	4	-0.103617	0.542487	4	-0.154261	0.209038	-0.0784882	0.813183	0.968555	FALSE	None
C1orf170	4	-0.722511	0.197179	4	-0.446675	0.281974	0.348545	0.260033	0.788173	FALSE	None
C1orf172	4	-0.302039	0.562132	4	-0.310254	0.298012	-0.0123566	0.967364	0.995884	FALSE	None
C1orf173	4	0.0750059	0.328882	4	-0.144137	0.0157662	-0.265085	0.395152	0.860909	FALSE	None
C1orf174	4	-0.311975	2.48153	4	-0.636491	2.92047	-0.443651	0.119029	0.661995	FALSE	None
C1orf177	4	-0.758837	0.553258	4	-0.538809	0.687696	0.259363	0.368578	0.851917	FALSE	None
C1orf180	4	-0.215065	0.534951	4	0.13161	0.0674283	0.298209	0.367884	0.851859	FALSE	None
C1orf185	4	0.0541818	0.332491	4	0.0414634	0.208775	-0.100887	0.725964	0.952749	FALSE	None
C1orf186	4	0.393832	0.120153	4	0.379902	0.0526065	-0.198331	0.495171	0.894496	FALSE	None
C1orf189	4	-0.159563	0.265329	4	-0.203641	0.0175238	-0.0524351	0.856666	0.978379	FALSE	None
C1orf192	4	-0.373248	0.346544	4	-0.175921	0.298441	0.189037	0.498546	0.89692	FALSE	None
C1orf194	4	-0.406428	1.02188	4	-1.00101	0.794646	-0.567188	0.0556774	0.528033	FALSE	None
C1orf195	4	0.537065	0.127208	4	-0.187764	0.182816	-0.8324	0.0119172	0.320541	TRUE	Negative
C1orf198	4	0.00707308	0.0515151	4	-0.0712643	0.146576	-0.127112	0.651793	0.937212	FALSE	None
C1orf200	4	0.376114	0.312119	4	0.395781	0.588787	-0.219054	0.461538	0.880552	FALSE	None
C1orf204	4	0.276973	0.0487967	4	0.11471	0.53819	-0.28929	0.333451	0.830403	FALSE	None
C1orf21	4	0.123424	0.172788	4	0.384149	0.500898	0.110093	0.720571	0.952109	FALSE	None
C1orf210	4	0.152099	0.0488748	4	-0.0271245	0.476423	-0.262818	0.361132	0.847864	FALSE	None
C1orf213	4	0.109534	0.218671	4	-0.412791	0.270204	-0.544142	0.0754379	0.586758	FALSE	None
C1orf216	4	0.169916	0.373526	4	-0.69529	0.464056	-0.877998	0.00646073	0.232533	TRUE	Negative
C1orf220	4	0.0108642	0.168999	4	-0.437455	0.379712	-0.459997	0.127629	0.675813	FALSE	None
C1orf226	4	-0.099148	0.0522291	4	-0.0809006	1.64669	-0.0460256	0.894362	0.982835	FALSE	None
C1orf227	4	0.250257	0.14325	4	0.197641	0.46704	-0.19035	0.532525	0.905142	FALSE	None
C1orf228	4	-0.570641	3.5042	4	-0.197076	0.0606663	0.352929	0.481288	0.887677	FALSE	None
C1orf229	4	-0.0121152	0.176971	4	-0.278891	0.151721	-0.284309	0.33205	0.829553	FALSE	None
C1orf233	4	-0.00189663	0.230587	4	-0.169475	0.361145	-0.201506	0.525389	0.90329	FALSE	None
C1orf27	4	-0.763981	0.610242	4	-2.56219	0.250144	-1.69988	5.38186e-06	0.00181783	TRUE	Negative
C1orf35	4	0.157209	0.148508	4	-0.86053	0.0242607	-0.982306	0.0022158	0.130161	TRUE	Negative
C1orf43	4	0.577561	0.901345	4	0.134914	0.201728	-0.638194	0.084149	0.60401	FALSE	None
C1orf50	4	0.314736	0.158859	4	0.142308	0.370146	-0.322363	0.264771	0.791429	FALSE	None
C1orf51	4	-0.0749148	0.126741	4	-0.169466	0.205204	-0.118858	0.679979	0.94492	FALSE	None
C1orf52	4	-0.112171	0.193289	4	-0.486662	0.687255	-0.376647	0.212203	0.7577	FALSE	None
C1orf53	4	-0.482663	1.16731	4	-0.380978	1.50875	0.051211	0.856827	0.978452	FALSE	None
C1orf54	4	-0.275336	0.439243	4	-0.404013	0.353986	-0.124766	0.670754	0.94249	FALSE	None
C1orf56	4	-0.576123	0.401655	4	-0.290303	1.22903	0.275718	0.373183	0.853797	FALSE	None
C1orf61	4	-0.339006	0.461521	4	-0.14849	0.275858	0.174657	0.545171	0.907728	FALSE	None
C1orf63	4	0.426258	0.211614	4	-0.47543	0.348702	-0.959356	0.00369598	0.175449	TRUE	Negative
C1orf64	4	-0.57782	0.3464	4	-0.427867	0.157213	0.196356	0.497425	0.895987	FALSE	None
C1orf65	4	0.12514	0.0892788	4	-0.369933	0.677637	-0.528281	0.0977512	0.625075	FALSE	None
C1orf68	4	0.00857136	0.315518	4	-0.319123	2.7816	-0.433329	0.252565	0.785375	FALSE	None
C1orf74	4	-1.01311	0.491562	4	-0.972588	1.17047	0.116613	0.684402	0.946135	FALSE	None
C1orf85	4	0.00871041	0.268148	4	-0.747547	0.110212	-0.72134	0.0218768	0.395707	TRUE	Negative
C1orf86	4	-0.716747	0.547955	4	-0.168033	0.715329	0.547381	0.059037	0.535578	FALSE	None
C1orf87	4	0.455841	0.0620307	4	0.125051	0.597739	-0.490974	0.130094	0.677349	FALSE	None
C1orf94	4	-0.215722	0.0749553	4	-0.136967	0.511389	0.0675861	0.828005	0.971916	FALSE	None
C1orf95	4	-0.290108	0.0861764	4	-0.383817	0.143485	-0.0645634	0.816495	0.968856	FALSE	None
C1QA	3	0.40857	0.00930796	3	0.173459	0.632919	-0.406946	0.239472	0.774356	FALSE	None
C1QB	4	-0.567507	3.06415	4	-0.526848	2.72538	-0.077926	0.794933	0.965174	FALSE	None
C1QBP	4	-2.07889	0.643911	4	-2.74703	0.730428	-0.611373	0.0383475	0.479726	FALSE	None
C1QC	4	0.17246	0.0673851	4	-0.087215	0.178588	-0.331239	0.24821	0.782116	FALSE	None
C1QL1	4	-0.0704017	0.254703	4	-0.772941	0.546707	-0.66565	0.0419389	0.489711	FALSE	None
C1QL2	4	-0.261756	0.408191	4	-0.420633	0.349904	-0.123142	0.730767	0.953793	FALSE	None
C1QL3	4	0.230948	0.103511	4	0.194628	0.0582626	-0.154633	0.599567	0.923127	FALSE	None
C1QL4	3	0.0929652	0.00464105	3	0.277785	0.126606	0.0738481	0.824029	0.970624	FALSE	None
C1QTNF1	4	-0.59956	1.46466	4	0.0734658	1.35444	0.568317	0.0594174	0.537016	FALSE	None
C1QTNF2	4	0.247293	0.0567938	4	0.583839	1.0538	0.118615	0.725628	0.952749	FALSE	None
C1QTNF3	4	0.16224	0.272208	4	-0.536979	0.506192	-0.727255	0.0147268	0.350491	TRUE	Negative
C1QTNF4	4	-0.217665	0.419371	4	-0.818043	0.66757	-0.572428	0.0574034	0.532892	FALSE	None
C1QTNF5	4	-0.310433	1.53331	4	-0.53753	0.422066	-0.245686	0.447367	0.876198	FALSE	None
C1QTNF6	4	-0.10627	0.148154	4	-0.406342	0.129593	-0.292373	0.311105	0.8169	FALSE	None
C1QTNF7	4	-0.282857	0.353154	4	0.112438	0.498845	0.334985	0.240277	0.7756	FALSE	None
C1QTNF8	4	-0.879402	1.04559	4	-0.250048	0.69889	0.630085	0.0432124	0.491887	FALSE	None
C1RL	4	-0.267324	0.0801882	4	-0.24814	0.039349	0.0346635	0.903033	0.984872	FALSE	None
C1S	4	-0.321346	0.295245	4	-0.0800214	0.0744572	0.240721	0.441802	0.873833	FALSE	None
C2	4	-0.481601	1.26686	4	-0.449967	0.828486	0.00575305	0.984184	0.997998	FALSE	None
C20orf112	4	-0.174027	0.639123	4	-0.300413	0.399136	-0.143208	0.663106	0.939435	FALSE	None
C20orf141	4	-0.00452983	0.399613	4	0.153366	0.513199	0.0438147	0.874392	0.97935	FALSE	None
C20orf144	NA	NA	NA	NA	NA	NA	NA	NA	NA	NA	None
C20orf166	4	-0.0657986	0.184881	4	-0.0680969	0.0697331	-0.0422798	0.881912	0.980892	FALSE	None
C20orf173	4	-0.382889	0.0258397	4	-0.352165	0.476171	0.0627855	0.827459	0.971916	FALSE	None
C20orf187	NA	NA	NA	NA	NA	NA	NA	NA	NA	NA	None
C20orf194	4	-0.175015	0.492351	4	0.216728	0.0627206	0.325852	0.318916	0.820921	FALSE	None
C20orf195	4	0.17564	0.202189	4	-0.105932	0.473536	-0.365103	0.241011	0.776517	FALSE	None
C20orf196	4	-0.877742	0.142153	4	-1.039	0.430807	-0.0568596	0.85642	0.978289	FALSE	None
C20orf197	4	-0.112844	0.261047	4	0.308082	0.685722	0.303382	0.283257	0.801274	FALSE	None
C20orf201	4	-0.134929	0.289143	4	-0.0753236	0.270615	0.0174148	0.950966	0.992778	FALSE	None
C20orf202	4	0.0521146	0.463777	4	0.216823	0.074224	0.0617002	0.843751	0.975967	FALSE	None
C20orf24	4	-0.498557	0.573679	4	-0.551158	0.57572	-0.0328629	0.905884	0.985442	FALSE	None
C20orf26	4	-0.254799	0.555567	4	-0.0502563	0.167781	0.171412	0.567839	0.914083	FALSE	None
C20orf27	4	-0.377819	0.320992	4	-0.812899	0.417624	-0.379397	0.203335	0.751174	FALSE	None
C20orf62	4	-0.306997	0.540965	4	-0.365227	0.0290286	-0.0350254	0.910662	0.986027	FALSE	None
C20orf78	4	0.380701	0.218242	4	0.070669	0.334779	-0.454881	0.127879	0.676001	FALSE	None
C20orf85	4	-0.216146	0.308688	4	-0.00440404	0.373941	0.165461	0.565907	0.913739	FALSE	None
C20orf96	4	-0.830994	0.977896	4	-0.778383	0.168691	0.127264	0.707634	0.949481	FALSE	None
C21orf119	4	-0.0555598	0.263631	4	0.147237	0.0772394	0.132193	0.664407	0.939695	FALSE	None
C21orf128	3	0.0209958	0.521799	3	0.233302	0.0713692	0.10239	0.769095	0.960132	FALSE	None
C21orf2	4	-1.66513	2.64469	4	-1.56469	2.09768	0.107165	0.70389	0.949257	FALSE	None
C21orf33	4	-0.0975348	0.24298	4	-0.0545796	0.23602	-0.0026887	0.992435	0.998365	FALSE	None
C21orf37	NA	NA	NA	NA	NA	NA	NA	NA	NA	NA	None
C21orf49	4	-0.386794	0.0553019	4	-0.190285	0.212082	0.215041	0.453923	0.878027	FALSE	None
C21orf54	4	-0.898643	1.11121	4	-0.877538	0.894733	0.0788312	0.789572	0.963931	FALSE	None
C21orf58	4	0.127375	0.0468773	4	-0.202882	0.440103	-0.38479	0.183539	0.73231	FALSE	None
C21orf59	4	-2.91129	0.916271	4	-3.25418	0.408841	-0.332266	0.244241	0.779124	FALSE	None
C21orf62	4	-0.245228	1.11054	4	-0.570204	0.52946	-0.303456	0.443339	0.874276	FALSE	None
C21orf67	4	0.0129474	0.0948571	4	0.234605	0.263429	0.113102	0.688446	0.946135	FALSE	None
C21orf88	4	-0.091604	0.0756383	4	-0.217314	0.109319	-0.137808	0.635665	0.932675	FALSE	None
C21orf90	4	0.0801467	0.236881	4	-0.112349	0.0365557	-0.24333	0.419157	0.869286	FALSE	None
C21orf91	4	-0.158285	0.28959	4	-0.0456168	0.227635	0.069465	0.802569	0.966139	FALSE	None
C22orf15	4	0.0468886	0.0172937	4	0.362481	0.174644	0.195549	0.492126	0.893292	FALSE	None
C22orf23	4	-0.629344	0.724733	4	0.0844566	0.387873	0.724247	0.0634863	0.550351	FALSE	None
C22orf24	4	0.0247691	0.0765267	4	-0.0295101	0.17427	-0.112233	0.688705	0.946234	FALSE	None
C22orf26	4	0.247248	0.186159	4	0.442354	0.0382106	0.0235886	0.935376	0.991165	FALSE	None
C22orf29	4	-0.295081	0.0683759	4	-0.724984	0.598841	-0.377	0.227583	0.766905	FALSE	None
[truncated: 16,049 more rows]

## Sheet: 1nM Camptothecin
Orobas Analyisis of 1nM Camptothecin Whole Genome CRISPR Screen
gene	n_T18_DMSO_Rich	mean_T18_DMSO_Rich	variance_T18_DMSO_Rich	n_T18_CAMPTOTHECIN_Rich	mean_T18_CAMPTOTHECIN_Rich	variance_T18_CAMPTOTHECIN_Rich	differential_T18_CAMPTOTHECIN_Rich_vs_T18_DMSO_Rich	pval_T18_CAMPTOTHECIN_Rich_vs_T18_DMSO_Rich	fdr_T18_CAMPTOTHECIN_Rich_vs_T18_DMSO_Rich	significant_T18_CAMPTOTHECIN_Rich_vs_T18_DMSO_Rich	effect_type_T18_CAMPTOTHECIN_Rich
A1BG	4	-0.727171	0.249235	4	-0.616234	0.782204	0.308388	0.239876	0.799906	FALSE	None
A1CF	4	0.0526004	0.227783	4	-0.275742	0.910668	-0.308226	0.236545	0.799906	FALSE	None
A2M	4	-0.422239	0.14671	4	0.0544883	1.1042	0.518551	0.0492972	0.552766	FALSE	None
A2ML1	4	0.208971	0.804974	4	0.321095	0.469546	-0.0199211	0.941022	0.995794	FALSE	None
A3GALT2	4	-0.0201883	0.0392308	4	-0.20674	0.0326006	-0.178487	0.462283	0.894911	FALSE	None
A4GALT	4	-0.348373	0.365241	4	0.407027	1.12004	0.714385	0.0236103	0.436517	FALSE	None
A4GNT	4	-0.283035	0.0306964	4	-0.213269	0.0302095	0.136341	0.56105	0.921253	FALSE	None
AAAS	4	-0.26079	0.329325	4	-0.350013	0.0953633	0.00516426	0.985563	0.998397	FALSE	None
AACS	4	0.162556	0.0904542	4	-0.318698	0.580887	-0.478599	0.0847811	0.646762	FALSE	None
AADAC	4	0.269521	0.844036	4	0.0822229	0.683904	-0.292944	0.248415	0.80605	FALSE	None
AADACL2	4	-0.183281	0.123598	4	-0.298845	0.620707	-0.0471596	0.860635	0.982369	FALSE	None
AADACL3	4	-0.119001	0.100969	4	-0.0293303	0.312231	0.0913666	0.705091	0.953218	FALSE	None
AADACL4	4	-0.227925	0.244402	4	0.00136829	0.146772	0.245372	0.32703	0.847106	FALSE	None
AADAT	4	0.328533	0.175488	4	0.109642	0.0417461	-0.339837	0.17568	0.762138	FALSE	None
AAED1	4	0.0221404	0.130777	4	0.281083	0.0137622	0.16576	0.503654	0.906743	FALSE	None
AAGAB	4	-0.493573	1.28334	4	-0.908068	2.77181	-0.334571	0.172618	0.758324	FALSE	None
AAK1	4	-0.367015	0.125696	4	0.0159187	0.0233229	0.417975	0.110218	0.688836	FALSE	None
AAMDC	4	0.362629	0.124848	4	0.371144	0.239217	-0.171955	0.475788	0.899843	FALSE	None
AAMP	4	-2.70031	1.21838	4	-2.7987	0.918116	0.112201	0.632152	0.935663	FALSE	None
AANAT	4	-0.188725	0.0833686	4	-0.264821	0.357538	-0.00893365	0.970333	0.997829	FALSE	None
AAR2	4	0.0721255	0.0253106	4	-0.264966	0.0570975	-0.334339	0.165866	0.754	FALSE	None
AARD	4	-0.695275	1.18941	4	-1.11114	2.30345	-0.293986	0.237418	0.799906	FALSE	None
AARS	4	-3.51415	0.155369	4	-3.505	0.268012	0.0961997	0.684853	0.950191	FALSE	None
AARS2	4	-0.950057	2.44083	4	-1.0033	2.93159	0.079003	0.747699	0.96285	FALSE	None
AARSD1	NA	NA	NA	NA	NA	NA	NA	NA	NA	NA	None
AASDH	4	-0.439617	0.537141	4	-0.562954	1.19138	-0.0301348	0.897138	0.989957	FALSE	None
AASDHPPT	4	-2.94688	0.348588	4	-2.52039	0.523007	0.643081	0.0338981	0.492552	FALSE	None
AASS	4	0.138387	0.0641824	4	0.0722233	0.52824	-0.13875	0.59825	0.928157	FALSE	None
AATF	4	-1.21591	0.198945	4	-1.47216	0.496963	0.115987	0.661348	0.9451	FALSE	None
AATK	4	-0.554256	0.175303	4	-0.488533	0.434946	0.236018	0.355226	0.857739	FALSE	None
ABAT	4	0.264361	0.15821	4	-0.00281389	0.471139	-0.35048	0.165819	0.754	FALSE	None
ABCA1	4	0.262783	0.610253	4	0.3556	0.339694	-0.0626039	0.845827	0.980795	FALSE	None
ABCA10	3	-0.232351	0.273531	3	0.644338	0.186877	0.764376	0.0168679	0.38579	TRUE	Positive
ABCA12	4	0.0475759	0.160077	4	0.279497	0.446997	0.144208	0.537568	0.915136	FALSE	None
ABCA13	4	-0.529538	0.0697154	4	-0.627037	0.251694	0.121342	0.629624	0.935315	FALSE	None
ABCA2	4	0.0778404	0.221211	4	0.0552885	0.181892	-0.0797022	0.748379	0.962853	FALSE	None
ABCA3	4	-0.367393	0.806079	4	-0.190662	0.752977	0.230079	0.354874	0.857643	FALSE	None
ABCA4	3	-0.0162447	0.103252	3	-0.207497	0.445834	-0.171748	0.540161	0.916124	FALSE	None
ABCA5	4	-0.0164895	0.507014	4	0.146681	0.108412	0.111729	0.686139	0.950191	FALSE	None
ABCA6	4	-0.0890978	0.0743484	4	-0.457201	0.13019	-0.288601	0.244522	0.802259	FALSE	None
ABCA7	4	-0.0753028	0.244911	4	0.011492	0.722844	0.0735969	0.751515	0.963653	FALSE	None
ABCA8	4	-0.00279074	0.154939	4	-0.203445	0.785406	-0.183768	0.47094	0.898195	FALSE	None
ABCA9	4	0.0731109	0.158337	4	0.503338	0.605865	0.286609	0.227617	0.795838	FALSE	None
ABCB1	4	-0.290509	0.40832	4	0.122442	0.338573	0.416098	0.0989448	0.666115	FALSE	None
ABCB10	4	-0.0247212	0.102369	4	-0.465084	0.191117	-0.375017	0.175548	0.762138	FALSE	None
ABCB11	4	0.0518844	0.195841	4	0.082575	0.108019	-0.0288791	0.906939	0.991182	FALSE	None
ABCB4	4	-0.0279851	0.0646173	4	-0.289974	0.15338	-0.228101	0.330133	0.848684	FALSE	None
ABCB5	4	0.11969	0.416037	4	0.203907	0.529169	-0.0106713	0.969238	0.997507	FALSE	None
ABCB6	4	-0.0269187	0.495699	4	-0.308827	0.863517	-0.267907	0.264965	0.818588	FALSE	None
ABCB7	4	-2.37938	1.64737	4	-2.21364	3.69982	0.351569	0.268143	0.819273	FALSE	None
ABCB8	4	-0.417679	0.192391	4	-0.63808	0.878314	-0.0460942	0.855479	0.981471	FALSE	None
ABCB9	4	-0.451222	0.217425	4	-0.226387	0.344039	0.33264	0.216893	0.788023	FALSE	None
ABCC1	4	-0.000396966	0.351766	4	-0.609627	0.590775	-0.529441	0.0499606	0.553208	FALSE	None
ABCC10	4	-0.0544824	0.110039	4	-0.106801	0.0990743	-0.0530372	0.827587	0.97664	FALSE	None
ABCC11	4	-0.167934	0.576075	4	-0.211393	0.714013	0.00962081	0.969899	0.997719	FALSE	None
ABCC12	4	-0.0540522	0.0644229	4	-0.422681	0.0443412	-0.304823	0.207506	0.782492	FALSE	None
ABCC2	4	-0.126828	0.022013	4	-0.346256	0.144517	-0.155735	0.513092	0.907754	FALSE	None
ABCC3	4	-0.0933339	0.840513	4	-0.228816	0.486686	-0.09801	0.779788	0.969711	FALSE	None
ABCC4	4	0.221736	0.158964	4	0.71772	0.330616	0.272247	0.260047	0.815181	FALSE	None
ABCC5	4	0.215401	0.0124877	4	0.0939216	0.238869	-0.218928	0.365467	0.862313	FALSE	None
ABCC6	4	-1.27921	0.0861259	4	-1.82694	0.289332	-0.161148	0.499096	0.904968	FALSE	None
ABCC8	4	-0.0156489	0.320448	4	-0.247482	0.300468	-0.205275	0.424259	0.881501	FALSE	None
ABCC9	4	-0.259622	0.213747	4	-0.201696	0.817522	0.122346	0.609661	0.930372	FALSE	None
ABCD1	4	0.0545617	0.302556	4	-0.605854	1.57185	-0.586237	0.0386559	0.516301	FALSE	None
ABCD2	4	-0.223684	0.0458245	4	0.466332	0.139399	0.605101	0.0218729	0.42376	FALSE	None
ABCD3	4	-0.00150614	0.694661	4	-0.274587	2.05155	-0.306126	0.275648	0.822641	FALSE	None
ABCD4	4	-0.273972	0.0348634	4	-0.13954	0.504586	0.191398	0.434279	0.885276	FALSE	None
ABCE1	4	-2.4625	1.6741	4	-2.46119	1.32001	0.190644	0.414167	0.878564	FALSE	None
ABCF1	4	-1.46632	3.4772	4	-1.28781	4.26765	0.209404	0.374834	0.864032	FALSE	None
ABCF2	4	-0.252181	0.266089	4	-0.350837	1.05233	-0.0497146	0.836178	0.978328	FALSE	None
ABCF3	4	0.0955008	0.147825	4	0.233229	0.105427	0.0391932	0.87864	0.986591	FALSE	None
ABCG1	4	-0.410187	1.14766	4	-0.811071	1.59525	-0.282907	0.23604	0.799906	FALSE	None
ABCG2	4	0.182787	0.0395487	4	-0.412174	0.262609	-0.579428	0.0223983	0.427148	FALSE	None
ABCG4	3	0.273525	0.0515754	3	0.307179	0.0176056	-0.113084	0.689086	0.951544	FALSE	None
ABCG5	4	-0.232183	0.718779	4	-0.245609	0.389749	0.049518	0.847751	0.981183	FALSE	None
ABCG8	4	-0.0561822	0.377434	4	0.571553	0.422341	0.501304	0.0707797	0.621899	FALSE	None
ABHD1	4	0.257914	0.077695	4	0.229004	0.0688544	-0.15803	0.506945	0.907481	FALSE	None
ABHD10	4	-0.150325	0.510114	4	0.304813	0.173197	0.391095	0.183732	0.769499	FALSE	None
ABHD11	4	-1.61427	0.97558	4	-1.32266	0.257599	0.634502	0.0297358	0.473142	FALSE	None
ABHD12	4	-0.214036	0.351323	4	-0.365065	0.327312	-0.0573199	0.815932	0.975921	FALSE	None
ABHD12B	4	-0.297835	0.0901876	4	-0.42681	0.584088	-0.0158168	0.948297	0.996345	FALSE	None
ABHD13	4	-0.0713302	0.117544	4	-0.0208349	0.589815	0.0457328	0.850396	0.981471	FALSE	None
ABHD14A	4	-0.0674068	0.25784	4	-0.286376	0.263201	-0.173025	0.473403	0.898709	FALSE	None
ABHD14B	4	-0.429681	0.0484957	4	-0.663383	0.310898	-0.0377703	0.878156	0.986513	FALSE	None
ABHD15	4	-0.32531	0.522586	4	-0.696148	1.11536	-0.236873	0.320296	0.842294	FALSE	None
ABHD16A	4	-0.49316	0.389072	4	-0.540006	0.384767	0.11189	0.68045	0.949962	FALSE	None
ABHD16B	4	0.0247928	0.45274	4	0.155489	0.0657202	0.0660803	0.807553	0.975921	FALSE	None
ABHD17A	3	-0.49271	0.224739	3	-0.566013	0.31918	0.120322	0.676492	0.949249	FALSE	None
ABHD17B	4	-0.14294	0.251694	4	-0.401901	0.604446	-0.175787	0.490796	0.904191	FALSE	None
ABHD17C	4	-0.242866	0.18218	4	-0.357793	0.63254	-0.033062	0.887798	0.988389	FALSE	None
ABHD2	4	-0.172884	0.350776	4	-0.336053	0.614407	-0.0968282	0.678741	0.949732	FALSE	None
ABHD3	4	-0.0166922	0.196371	4	-0.230135	1.8101	-0.186998	0.478052	0.900467	FALSE	None
ABHD4	4	-0.0451271	0.342537	4	0.132302	0.521109	0.12508	0.594127	0.927989	FALSE	None
ABHD5	4	-0.0195621	0.0418711	4	0.0482307	0.216109	0.026091	0.919572	0.992493	FALSE	None
ABHD6	4	0.238644	0.115796	4	0.127036	0.401507	-0.215653	0.375842	0.864277	FALSE	None
ABHD8	4	0.190908	0.206836	4	0.30679	0.219114	-0.0160282	0.951491	0.99652	FALSE	None
ABI1	4	-0.204114	0.340147	4	-0.079546	0.435835	0.158173	0.511236	0.907481	FALSE	None
ABI2	4	-0.257587	0.198174	4	-0.0800944	0.259785	0.219277	0.363818	0.860587	FALSE	None
ABI3	4	-0.23059	0.285446	4	0.150296	0.455807	0.370557	0.174945	0.761784	FALSE	None
ABI3BP	4	-0.115194	0.0565124	4	0.0632654	0.0666247	0.154872	0.511791	0.907486	FALSE	None
ABL1	4	-0.261894	0.402942	4	-0.124898	0.548964	0.180251	0.479764	0.900467	FALSE	None
ABL2	4	0.37846	1.20812	4	0.236676	0.146131	-0.290014	0.376622	0.864277	FALSE	None
ABLIM1	4	-0.287897	0.226524	4	-0.2145	0.685835	0.140231	0.556033	0.920121	FALSE	None
ABLIM2	4	-0.266008	0.241596	4	-0.0814218	0.757002	0.235441	0.322159	0.843427	FALSE	None
ABLIM3	4	0.124359	0.201672	4	-0.0368036	0.166258	-0.210483	0.390291	0.868373	FALSE	None
ABR	4	0.129128	0.234662	4	0.121489	0.174797	-0.0931152	0.696891	0.952718	FALSE	None
ABRA	4	0.270588	0.0593507	4	0.155044	0.261704	-0.233162	0.392734	0.868893	FALSE	None
ABRACL	4	0.278972	0.070851	4	0.244555	0.354906	-0.17132	0.4883	0.903123	FALSE	None
ABT1	4	-2.20645	0.292889	4	-2.19198	0.997098	0.327172	0.351852	0.855912	FALSE	None
ABTB1	4	-0.0202534	0.109001	4	-0.132841	0.976643	-0.10007	0.696273	0.952718	FALSE	None
ABTB2	4	0.308726	0.122148	4	0.406152	0.0614751	-0.0758816	0.753566	0.963653	FALSE	None
AC007040.11	3	0.0130153	0.032874	3	0.23014	0.150003	0.132477	0.648078	0.940917	FALSE	None
AC007431.1	4	-0.904308	0.847239	4	-1.03896	1.30013	0.0615271	0.792217	0.971567	FALSE	None
AC009892.10	NA	NA	NA	NA	NA	NA	NA	NA	NA	NA	None
AC016722.1	4	-0.550502	0.308073	4	-0.662991	0.0912754	0.0937452	0.709746	0.953567	FALSE	None
AC016757.3	4	-0.0787442	0.00896908	4	-0.0715116	0.104655	0.0017189	0.994198	0.999797	FALSE	None
AC018755.1	4	-0.0601257	0.35881	4	-0.255705	0.287623	-0.160722	0.520374	0.90932	FALSE	None
AC079612.1	4	0.39529	0.202838	4	0.519812	0.125944	-0.0883333	0.709661	0.953567	FALSE	None
AC091801.1	3	0.48352	0.0718421	3	0.556589	0.1579	-0.165872	0.547712	0.918491	FALSE	None
AC093802.1	4	0.295378	0.160994	4	0.233467	0.33306	-0.19802	0.421834	0.880876	FALSE	None
AC106876.2	4	0.0647458	0.116896	4	-0.125283	0.390124	-0.206738	0.403851	0.874829	FALSE	None
ACAA1	3	-0.262955	0.575541	3	-0.243595	0.290847	0.0939486	0.748203	0.96285	FALSE	None
ACAA2	4	0.110885	0.0674755	4	0.342046	0.274867	0.107944	0.695195	0.952522	FALSE	None
ACACA	4	-1.71967	2.50567	4	-1.71328	1.68854	0.193388	0.449432	0.890411	FALSE	None
ACACB	4	-0.107856	0.0101001	4	-0.0621849	0.0755659	0.04256	0.857257	0.98171	FALSE	None
ACAD10	4	-0.127285	0.509033	4	-0.205633	0.688267	-0.0481193	0.850994	0.981471	FALSE	None
ACAD11	4	-0.0869184	0.189516	4	-0.381633	0.367273	-0.225916	0.411769	0.877609	FALSE	None
ACAD8	4	0.153283	0.19075	4	0.265983	0.293923	-0.00400719	0.987659	0.998397	FALSE	None
ACAD9	4	-2.26879	0.360621	4	-1.48326	0.303525	1.13557	9.90242e-05	0.0238002	TRUE	Positive
ACADL	4	-0.0574679	0.373195	4	-0.070754	0.304763	-0.00824063	0.972592	0.998397	FALSE	None
ACADM	4	-0.419046	1.10817	4	-0.294131	0.247073	0.235626	0.436936	0.886204	FALSE	None
ACADS	4	-0.0193428	0.668095	4	-0.365723	1.12048	-0.317811	0.210664	0.783606	FALSE	None
ACADSB	4	0.00582929	0.264454	4	-0.421703	0.749271	-0.391699	0.114433	0.692212	FALSE	None
ACADVL	4	-0.0756643	0.266786	4	-0.0156966	1.10373	0.04407	0.854147	0.981471	FALSE	None
ACAN	4	-0.261062	1.0851	4	-0.900612	0.862148	-0.510953	0.0718775	0.625791	FALSE	None
ACAP1	4	-0.17467	0.336446	4	-0.54409	1.33382	-0.297922	0.22707	0.795838	FALSE	None
ACAP2	4	-0.00405694	0.267246	4	0.45972	0.236248	0.338581	0.215737	0.787506	FALSE	None
ACAP3	4	-0.680206	0.539771	4	-0.699994	0.465999	0.173382	0.481317	0.900879	FALSE	None
ACAT1	4	-0.196708	0.221943	4	0.612689	0.46522	0.693332	0.016869	0.38579	TRUE	Positive
ACAT2	4	-0.0839591	0.723377	4	-0.0529785	3.08219	-0.00413889	0.986596	0.998397	FALSE	None
ACBD3	4	0.204032	0.412856	4	-0.26835	0.421031	-0.482425	0.053361	0.569002	FALSE	None
ACBD4	4	-0.81232	0.514015	4	-0.3102	0.224982	0.696466	0.0135147	0.361952	TRUE	Positive
ACBD5	4	0.230168	0.0599448	4	0.07559	0.0804701	-0.249752	0.316617	0.84131	FALSE	None
ACBD6	4	-0.0893276	0.0873819	4	0.145871	0.050685	0.186906	0.457303	0.892847	FALSE	None
ACBD7	4	-0.14622	0.344771	4	0.223851	1.32102	0.325529	0.200376	0.778821	FALSE	None
ACCS	4	-0.0414993	0.31379	4	0.174222	0.260886	0.158534	0.536589	0.915136	FALSE	None
ACCSL	4	0.151587	0.0443576	4	0.131273	0.38413	-0.110304	0.684185	0.950191	FALSE	None
ACD	4	-0.83354	0.0033656	4	-0.799996	0.555276	0.318089	0.242141	0.799906	FALSE	None
ACE	4	-0.0550431	0.304601	4	-0.462985	0.83473	-0.326059	0.303101	0.833627	FALSE	None
ACE2	4	-0.113162	0.270624	4	-0.397028	0.593247	-0.214539	0.418466	0.880336	FALSE	None
ACER1	4	-0.522131	0.155142	4	-0.532174	0.0553644	0.179454	0.476223	0.899843	FALSE	None
ACER2	4	0.136827	0.403448	4	0.0157577	0.541211	-0.18456	0.44555	0.889544	FALSE	None
ACER3	4	-0.40511	0.635094	4	-0.332741	0.928957	0.140923	0.604259	0.929588	FALSE	None
ACHE	4	-0.330866	0.032381	4	-0.618205	0.519153	-0.12025	0.635464	0.936715	FALSE	None
ACIN1	4	-0.320608	0.0786662	4	-1.03063	0.59869	-0.482238	0.0579613	0.586158	FALSE	None
ACKR2	4	-0.0152057	0.123611	4	0.118218	0.276847	0.0816047	0.737697	0.959853	FALSE	None
ACKR3	4	0.31435	0.0160771	4	0.0822573	0.182882	-0.345272	0.164759	0.753087	FALSE	None
ACKR4	4	-0.2807	0.0124221	4	-0.549119	0.796504	-0.126746	0.625857	0.934168	FALSE	None
ACLY	4	-1.85323	1.64578	4	-1.72675	1.42907	0.350924	0.171076	0.7573	FALSE	None
ACMSD	4	-0.468887	0.500802	4	-0.609689	0.0581833	0.045153	0.868542	0.985194	FALSE	None
ACN9	4	-0.7035	0.427975	4	-0.488564	1.14196	0.356017	0.141264	0.722383	FALSE	None
ACO1	4	0.0629944	0.466986	4	0.0874453	0.383383	-0.0301885	0.907928	0.991213	FALSE	None
ACO2	4	-1.55194	1.23412	4	-1.27353	1.21101	0.527386	0.0440135	0.535356	FALSE	None
ACOT11	4	-0.281691	0.0830497	4	-0.125151	0.516399	0.21489	0.377222	0.864277	FALSE	None
ACOT12	3	-0.160322	0.182636	3	-0.456629	1.90985	-0.23168	0.469484	0.897348	FALSE	None
ACOT13	4	-0.335476	0.171722	4	-0.376132	0.155212	0.0775864	0.753653	0.963653	FALSE	None
ACOT2	4	-0.262949	0.394386	4	-0.204966	0.920426	0.130046	0.618916	0.932372	FALSE	None
ACOT4	4	-0.582385	0.57666	4	-0.596081	0.22771	0.153452	0.543354	0.916849	FALSE	None
ACOT6	4	0.184112	0.415163	4	-0.0869332	0.869943	-0.322029	0.206589	0.782062	FALSE	None
ACOT7	4	-0.120432	0.673294	4	-0.161751	0.307247	-0.0118936	0.963816	0.996848	FALSE	None
ACOT8	4	-0.227684	0.673191	4	-0.615111	2.36756	-0.313489	0.236313	0.799906	FALSE	None
ACOT9	4	0.141267	0.152137	4	0.318304	0.105567	0.0526557	0.846441	0.980987	FALSE	None
ACOX1	4	0.154935	0.0409443	4	-0.110729	0.0707572	-0.309559	0.192853	0.771818	FALSE	None
ACOX2	4	-0.318983	0.0885611	4	-0.258363	0.596117	0.141835	0.582063	0.925437	FALSE	None
ACOX3	4	0.122954	0.101043	4	0.291025	0.590726	0.0453229	0.850445	0.981471	FALSE	None
ACOXL	4	0.023801	0.446553	4	-0.227864	0.253	-0.240639	0.42435	0.881501	FALSE	None
ACP1	4	-0.00276363	0.112486	4	0.504911	0.126062	0.373578	0.130978	0.709919	FALSE	None
ACP2	4	-0.187771	0.473715	4	-0.536892	1.42799	-0.287424	0.260607	0.815454	FALSE	None
ACP5	4	-0.0208596	0.121882	4	-0.16606	0.426199	-0.132135	0.574948	0.923493	FALSE	None
ACP6	4	0.0704445	0.22498	4	-0.31092	1.23301	-0.358782	0.21758	0.788602	FALSE	None
ACPL2	4	0.164874	0.446084	4	0.153352	0.0424086	-0.109671	0.681832	0.950144	FALSE	None
ACPP	4	0.243564	0.365531	4	-0.678416	0.64414	-0.88339	0.0013924	0.127431	TRUE	Negative
ACPT	3	-0.29309	0.241179	3	-0.457225	0.0455934	-0.0376265	0.900935	0.990582	FALSE	None
ACR	4	-0.869328	0.273489	4	-1.41118	0.390979	-0.210051	0.385572	0.867804	FALSE	None
ACRBP	4	-0.305659	0.184611	4	-0.166898	0.231076	0.211148	0.380247	0.864721	FALSE	None
ACRC	3	0.359401	0.37606	3	0.373643	0.181606	-0.164388	0.574491	0.92348	FALSE	None
ACRV1	4	-0.113403	0.502835	4	-0.118774	1.74176	-0.0365987	0.879091	0.98673	FALSE	None
ACSBG1	4	0.0501879	0.0757393	4	0.171446	0.359241	0.0434651	0.861897	0.98261	FALSE	None
ACSBG2	4	-0.357973	0.0570707	4	0.325834	0.105519	0.654613	0.0134211	0.361952	TRUE	Positive
ACSF2	4	-0.122584	0.0293934	4	0.335848	0.0444816	0.379483	0.113813	0.692212	FALSE	None
ACSF3	4	-0.521986	0.508206	4	-0.799756	1.21086	-0.0970833	0.697063	0.952718	FALSE	None
ACSL1	4	0.376084	0.172573	4	0.0309322	0.0201875	-0.4599	0.0780826	0.637519	FALSE	None
ACSL3	4	-0.0246312	0.0852162	4	-0.206186	0.172237	-0.168369	0.49406	0.904445	FALSE	None
ACSL4	4	0.0813607	0.138317	4	0.473086	0.928683	0.248804	0.314813	0.8404	FALSE	None
ACSL5	4	-0.29557	1.66395	4	-0.715882	1.99606	-0.362124	0.160635	0.747964	FALSE	None
ACSL6	4	0.00283734	0.487785	4	-0.0939364	1.83112	-0.151603	0.547835	0.918491	FALSE	None
ACSM1	4	-0.0905421	0.392098	4	0.161456	0.405366	0.213085	0.422013	0.880876	FALSE	None
ACSM2A	NA	NA	NA	NA	NA	NA	NA	NA	NA	NA	None
ACSM2B	4	-0.305609	0.115649	4	-0.119662	0.0449929	0.239415	0.317484	0.841392	FALSE	None
ACSM3	4	-0.279146	0.232458	4	-0.279432	0.631168	0.0909902	0.696943	0.952718	FALSE	None
ACSM4	4	-0.246278	0.334749	4	-0.49006	0.785026	-0.139272	0.572525	0.923442	FALSE	None
ACSM5	4	-0.289725	0.144633	4	-0.378485	0.218383	0.023058	0.922736	0.993354	FALSE	None
ACSS1	4	-0.273884	0.0157344	4	-0.0949967	0.477141	0.226975	0.362393	0.860206	FALSE	None
ACSS2	4	-0.0514125	0.242729	4	0.195766	0.564219	0.194032	0.414358	0.878576	FALSE	None
ACSS3	3	-0.332744	0.373018	3	-0.75548	2.00443	-0.283551	0.353274	0.857125	FALSE	None
ACTA1	3	0.121131	0.279183	3	-0.0337264	0.184953	-0.204025	0.490065	0.903801	FALSE	None
ACTA2	4	0.586493	0.0544369	4	0.125161	0.506634	-0.64027	0.0190851	0.4028	FALSE	None
ACTB	3	-2.02989	0.319102	3	-1.42807	0.4979	0.991274	0.0106746	0.340269	TRUE	Positive
ACTBL2	4	0.110384	0.0920173	4	0.474055	0.386543	0.210953	0.37459	0.864032	FALSE	None
ACTC1	4	-0.497205	0.215546	4	-0.795789	0.525692	-0.0902867	0.70577	0.95345	FALSE	None
ACTG1	4	-1.18699	0.229166	4	-1.7071	0.821827	-0.164623	0.531125	0.91331	FALSE	None
ACTG2	4	-0.33298	0.505337	4	-0.171051	0.75429	0.202044	0.403732	0.874829	FALSE	None
ACTL10	4	-0.157521	0.208719	4	0.266179	0.00454874	0.366831	0.156307	0.742385	FALSE	None
ACTL6A	3	-2.56524	3.64233	3	-2.91007	2.09336	-0.129773	0.649437	0.941079	FALSE	None
ACTL6B	4	-0.216082	0.0875594	4	0.0107362	0.582812	0.243258	0.335038	0.84962	FALSE	None
ACTL7A	4	0.0334194	0.586384	4	-0.263887	0.581459	-0.28781	0.246056	0.803384	FALSE	None
ACTL7B	4	-0.204511	0.168742	4	-0.455337	0.313336	-0.141248	0.551096	0.919052	FALSE	None
ACTL8	3	0.223271	0.0258955	3	-0.102408	0.149865	-0.382925	0.177466	0.764725	FALSE	None
ACTL9	4	0.229471	0.0389026	4	0.693904	0.181689	0.251196	0.315666	0.840769	FALSE	None
ACTN1	4	0.067097	0.67723	4	-0.575423	2.56923	-0.624916	0.018453	0.399373	TRUE	Negative
ACTN2	4	0.0854358	0.0251854	4	-0.0969311	0.15273	-0.215629	0.383364	0.866324	FALSE	None
ACTN4	4	0.335554	0.154406	4	0.105215	0.0661037	-0.351073	0.196102	0.773582	FALSE	None
ACTR10	4	-2.59372	0.469487	4	-2.31481	0.82347	0.546252	0.0392042	0.51962	FALSE	None
ACTR1A	4	-1.47174	1.60196	4	-0.585609	1.50974	1.0849	0.0015856	0.138029	TRUE	Positive
ACTR1B	4	-0.999694	2.90025	4	-1.05679	1.22421	0.0785256	0.783581	0.970511	FALSE	None
ACTR2	4	-3.16217	0.215118	4	-3.02384	0.163509	0.285422	0.232662	0.798751	FALSE	None
ACTR3	4	-1.64199	1.25897	4	-1.95803	0.854328	-0.0415888	0.886393	0.987962	FALSE	None
ACTR3B	3	-0.348257	0.203001	3	-0.156725	0.316884	0.263174	0.344928	0.852775	FALSE	None
ACTR3C	NA	NA	NA	NA	NA	NA	NA	NA	NA	NA	None
ACTR5	4	-1.92997	1.83048	4	-2.0968	3.31755	0.00887452	0.97408	0.998397	FALSE	None
ACTR6	4	-3.82495	0.316969	4	-4.03324	0.381807	-0.172897	0.478195	0.900467	FALSE	None
ACTR8	4	-2.40052	0.807503	4	-2.61837	0.449859	0.0550618	0.812431	0.975921	FALSE	None
ACTRT1	4	0.523124	0.0900776	4	0.538188	0.830238	-0.236617	0.370074	0.862926	FALSE	None
ACTRT2	4	0.0699513	0.132174	4	0.150904	0.452277	0.00855142	0.971599	0.998021	FALSE	None
ACTRT3	4	-0.29947	0.0505061	4	-0.374142	0.0460235	0.0303496	0.90153	0.990784	FALSE	None
ACVR1	4	-0.859283	0.182073	4	-0.562687	0.65898	0.508439	0.0530362	0.568699	FALSE	None
ACVR1B	4	-0.153062	0.395508	4	-0.11377	0.590938	0.0680987	0.790418	0.971567	FALSE	None
ACVR1C	4	0.251419	0.134716	4	-0.103518	0.107858	-0.417631	0.0938267	0.659506	FALSE	None
ACVR2A	4	-0.433132	0.150915	4	-0.326158	0.523671	0.237386	0.384564	0.866891	FALSE	None
ACVR2B	4	-0.865997	0.588075	4	-0.887065	0.882793	0.208943	0.398795	0.871849	FALSE	None
ACVRL1	4	-0.43506	0.210242	4	-0.460489	0.435961	0.107186	0.649228	0.941079	FALSE	None
ACY1	4	-0.451476	0.117467	4	-0.530251	0.790333	0.0874884	0.753358	0.963653	FALSE	None
ACY3	4	-0.170314	0.14244	4	-0.205352	0.218308	0.0097699	0.969552	0.997552	FALSE	None
ACYP1	4	0.295257	0.128029	4	-0.070483	0.39056	-0.441707	0.104497	0.678676	FALSE	None
ACYP2	4	-0.124504	0.263597	4	-0.0508724	0.210157	0.0771314	0.775377	0.968535	FALSE	None
ADA	4	-0.426094	0.151388	4	-0.754696	1.61688	-0.189143	0.495125	0.90467	FALSE	None
ADAD1	4	0.287203	0.126356	4	0.0932958	0.268158	-0.301121	0.217413	0.788602	FALSE	None
ADAD2	4	0.639079	0.043494	4	0.130256	0.0263633	-0.691169	0.00936885	0.326979	TRUE	Negative
ADAL	4	-0.0743839	0.618912	4	-0.0762818	3.5037	-0.0368407	0.891954	0.989159	FALSE	None
ADAM10	4	0.37412	0.0679642	4	0.16924	0.548836	-0.34828	0.16257	0.751216	FALSE	None
ADAM11	4	-0.393054	0.180063	4	-0.148801	0.140422	0.322126	0.23701	0.799906	FALSE	None
ADAM12	4	-0.263626	0.152784	4	-0.0771736	0.148905	0.225763	0.362705	0.860206	FALSE	None
ADAM15	4	0.0503437	0.8575	4	-0.133372	0.928693	-0.224505	0.355415	0.858018	FALSE	None
ADAM17	3	0.337807	0.374508	3	0.303201	1.4812	-0.200868	0.485623	0.901927	FALSE	None
ADAM18	4	-0.114633	0.0667269	4	0.190938	0.328009	0.259985	0.283617	0.823698	FALSE	None
ADAM19	4	-0.186125	0.122319	4	-0.0788457	0.183382	0.132386	0.576215	0.923977	FALSE	None
ADAM2	4	0.105591	0.0612465	4	-0.265705	0.308787	-0.375008	0.1825	0.7688	FALSE	None
ADAM20	4	-0.123343	0.259471	4	-0.215251	0.922567	-0.0604429	0.810577	0.975921	FALSE	None
ADAM21	4	0.0628443	0.476988	4	-0.269127	0.0434965	-0.317451	0.244537	0.802259	FALSE	None
ADAM22	4	-0.192514	0.0638123	4	-0.238794	0.145718	0.00780282	0.974033	0.998397	FALSE	None
ADAM23	4	0.259156	0.207123	4	0.3872	0.189933	-0.0314194	0.901815	0.990847	FALSE	None
ADAM28	4	0.0539847	0.260098	4	-0.0991904	0.895855	-0.177285	0.480446	0.900555	FALSE	None
ADAM29	4	0.176582	0.0881564	4	0.383886	0.918513	0.0643639	0.800185	0.973503	FALSE	None
ADAM30	4	-0.417665	0.0853115	4	-0.427297	0.0918023	0.134247	0.570087	0.923017	FALSE	None
ADAM32	4	0.274041	0.0984889	4	0.394297	0.0450248	-0.0434228	0.861366	0.982473	FALSE	None
ADAM33	4	-0.369339	0.443528	4	-0.479938	0.452391	0.0212337	0.935913	0.995134	FALSE	None
ADAM7	4	-0.12905	0.22623	4	-0.174045	0.583607	-0.0184749	0.937174	0.995134	FALSE	None
ADAM8	4	-0.00419118	0.167482	4	0.129127	0.302029	0.0797752	0.734548	0.958799	FALSE	None
ADAM9	4	-0.393094	0.531306	4	-0.632502	1.22146	-0.0643696	0.792423	0.971567	FALSE	None
ADAMDEC1	4	0.331432	0.275471	4	0.0513698	0.24567	-0.393699	0.130567	0.70891	FALSE	None
ADAMTS1	4	-0.447931	1.00709	4	0.2657	0.875637	0.68593	0.0246348	0.444235	FALSE	None
ADAMTS10	4	-0.338888	0.289544	4	-0.63234	0.35007	-0.142055	0.575499	0.923702	FALSE	None
ADAMTS12	3	0.0965726	0.149421	3	-0.104955	0.788904	-0.219869	0.434578	0.885324	FALSE	None
ADAMTS13	4	-0.162646	0.192115	4	-0.0327019	0.198832	0.137238	0.60583	0.929588	FALSE	None
ADAMTS14	4	0.0609775	0.194994	4	-0.177428	0.0837564	-0.248012	0.334201	0.84962	FALSE	None
ADAMTS15	4	0.35722	0.108436	4	0.694691	0.189739	0.0962454	0.698075	0.952931	FALSE	None
ADAMTS16	4	-0.326202	1.26206	4	-0.457765	2.22111	-0.13383	0.605687	0.929588	FALSE	None
ADAMTS17	4	-0.0980392	0.267953	4	0.0780081	0.066226	0.145718	0.589047	0.927283	FALSE	None
ADAMTS18	4	0.241889	0.0731336	4	0.0534623	0.591497	-0.279423	0.275897	0.822641	FALSE	None
ADAMTS19	4	0.119991	0.615667	4	-0.150718	0.121363	-0.290071	0.312165	0.837589	FALSE	None
ADAMTS2	4	-0.372918	0.789416	4	-0.226612	0.192181	0.226201	0.450461	0.890411	FALSE	None
ADAMTS20	4	0.38117	0.371363	4	0.136422	0.52169	-0.376545	0.118931	0.697333	FALSE	None
ADAMTS3	4	-0.237593	0.0114779	4	-0.422134	0.462496	-0.0738009	0.770831	0.967823	FALSE	None
ADAMTS4	4	-0.151744	0.0342196	4	-0.192418	0.130797	-0.00409575	0.986133	0.998397	FALSE	None
ADAMTS5	4	-0.061768	0.2559	4	0.0722233	0.486848	0.107262	0.690768	0.952476	FALSE	None
ADAMTS7	4	0.0159028	0.375007	4	-0.570063	0.228972	-0.507238	0.0681075	0.614273	FALSE	None
ADAMTS8	4	0.290647	0.222258	4	0.583329	0.246315	0.0886576	0.707928	0.953532	FALSE	None
ADAMTS9	4	-0.187146	0.250652	4	-0.677626	1.20872	-0.401462	0.117371	0.697333	FALSE	None
ADAMTSL1	4	0.11336	0.149003	4	-0.0259384	0.08737	-0.188615	0.42684	0.882419	FALSE	None
ADAMTSL2	4	-0.143669	0.471985	4	-0.438621	1.10863	-0.26328	0.264947	0.818588	FALSE	None
ADAMTSL3	4	-0.576443	0.379888	4	-0.568767	1.1183	0.16609	0.48975	0.903757	FALSE	None
ADAMTSL4	4	0.0296518	0.668217	4	-0.287088	0.892638	-0.288839	0.408356	0.876603	FALSE	None
ADAMTSL4-AS1	4	0.199746	0.0713583	4	0.154568	0.169397	-0.150305	0.524767	0.910452	FALSE	None
ADAMTSL5	4	-0.501196	0.602182	4	-0.679813	0.747295	0.00236895	0.992034	0.999646	FALSE	None
ADAP1	4	-0.0103914	0.173129	4	-0.475006	0.386997	-0.391332	0.125008	0.702512	FALSE	None
ADAP2	4	-0.563175	0.264077	4	-0.686729	0.18778	0.109472	0.68156	0.950058	FALSE	None
ADAR	4	-0.157089	0.0769599	4	0.0133769	0.154054	0.166113	0.491427	0.904191	FALSE	None
ADARB1	4	0.189032	0.080441	4	0.107417	0.342243	-0.172633	0.516218	0.908775	FALSE	None
ADARB2	4	0.182475	0.218734	4	0.219978	0.8015	-0.07226	0.766657	0.967701	FALSE	None
ADAT1	4	0.0047896	0.305487	4	0.0776166	0.70131	0.0298398	0.898583	0.989957	FALSE	None
ADAT2	3	-2.18739	4.04	3	-2.74096	3.48211	-0.38943	0.170631	0.757125	FALSE	None
ADAT3	4	-2.81652	1.55863	4	-2.74271	2.16205	0.220522	0.374001	0.864032	FALSE	None
ADC	4	-0.815344	0.180821	4	-0.594166	0.14093	0.471807	0.0562407	0.579072	FALSE	None
ADCK1	4	0.215265	0.140436	4	-0.0830581	0.0360044	-0.358886	0.148064	0.731848	FALSE	None
ADCK2	4	-0.206876	0.644844	4	-0.011647	0.852759	0.213831	0.45321	0.89137	FALSE	None
ADCK3	4	-0.141195	0.264187	4	-0.100357	0.574751	0.0657527	0.777871	0.96945	FALSE	None
ADCK4	4	-0.177141	0.262503	4	0.170076	1.08989	0.311855	0.205901	0.781306	FALSE	None
ADCK5	3	0.0441746	0.867339	3	-0.388195	2.06855	-0.43736	0.138928	0.718335	FALSE	None
ADCY1	4	-0.439224	0.0279393	4	-0.121329	0.10273	0.399505	0.0989232	0.666115	FALSE	None
ADCY10	4	-0.114334	0.0211634	4	-0.0357634	0.25322	0.0742717	0.770227	0.967823	FALSE	None
ADCY2	4	0.140675	0.0588513	4	-0.0431065	0.045613	-0.240116	0.321332	0.842878	FALSE	None
ADCY3	4	0.132705	0.21421	4	-0.386247	0.317259	-0.492327	0.0472216	0.548728	FALSE	None
ADCY4	4	-0.0942385	0.24459	4	-0.412774	0.690526	-0.23412	0.370708	0.862926	FALSE	None
ADCY5	4	-0.087665	0.112635	4	-0.0519899	0.124787	0.0282553	0.910203	0.99134	FALSE	None
ADCY6	4	-0.0535588	0.109213	4	0.144437	0.6657	0.147676	0.544592	0.917727	FALSE	None
ADCY7	4	-0.683341	0.215135	4	-0.219962	0.898427	0.620379	0.0662618	0.611046	FALSE	None
ADCY8	3	-0.348185	0.204494	3	-1.01969	1.0034	-0.463046	0.113223	0.692212	FALSE	None
ADCY9	4	-0.0701427	0.124215	4	0.234543	0.14194	0.240247	0.323679	0.844614	FALSE	None
ADCYAP1	4	-0.901656	3.95875	4	-0.645556	2.6475	0.221074	0.393608	0.869383	FALSE	None
ADCYAP1R1	4	0.1066	0.395914	4	-0.167742	1.25177	-0.30163	0.207269	0.782492	FALSE	None
ADD1	4	0.319214	0.06122	4	0.324227	0.174218	-0.154352	0.5111	0.907481	FALSE	None
ADD2	4	-0.578006	0.629452	4	-0.584243	0.919447	0.113319	0.639055	0.937943	FALSE	None
ADD3	4	0.248651	0.683728	4	0.160732	0.954763	-0.199029	0.412026	0.877722	FALSE	None
ADGB	4	-0.148035	0.721987	4	-0.0880973	1.39772	0.0282663	0.906521	0.991182	FALSE	None
ADH1A	4	0.223538	0.0584308	4	0.321053	0.26556	-0.0402392	0.867315	0.985007	FALSE	None
ADH1B	4	0.0570161	0.186649	4	0.100503	0.0546934	-0.0205325	0.93524	0.995134	FALSE	None
ADH4	4	0.0564376	0.0677599	4	0.0976309	0.0852594	-0.0228564	0.922964	0.993378	FALSE	None
ADH5	4	0.0418541	0.219097	4	-0.481759	1.18438	-0.466033	0.0675305	0.613379	FALSE	None
ADH6	4	-0.00401479	0.117781	4	-0.692877	0.189274	-0.577487	0.0222053	0.424852	FALSE	None
ADH7	4	0.296036	0.140231	4	0.0388646	0.0760031	-0.359336	0.146146	0.729233	FALSE	None
ADHFE1	4	-0.0712163	0.930009	4	-0.0722776	1.52772	-0.0541822	0.819075	0.975921	FALSE	None
ADI1	4	-0.978617	2.35725	4	-0.990078	1.33718	0.12017	0.666251	0.946259	FALSE	None
ADIG	4	0.247651	0.196166	4	0.460611	0.0130841	0.0402512	0.871899	0.98549	FALSE	None
ADIPOQ	4	0.266116	0.098582	4	0.47147	0.647357	0.0187064	0.939797	0.995753	FALSE	None
ADIPOR1	4	-1.05676	0.258261	4	-0.756476	0.879475	0.562373	0.0339413	0.492552	FALSE	None
ADIPOR2	4	0.283423	0.0643051	4	0.373853	0.0969396	-0.0715571	0.769049	0.967823	FALSE	None
ADIRF	4	-0.925747	0.927249	4	-0.504711	0.453596	0.597953	0.0258641	0.450672	FALSE	None
ADK	4	0.041681	0.0656014	4	0.0979396	0.0409025	-0.00958737	0.96928	0.997507	FALSE	None
ADM	4	0.0750639	0.230765	4	0.138235	0.0258464	-0.0123562	0.961215	0.99652	FALSE	None
ADM2	4	-0.182625	0.389993	4	0.0571305	0.73352	0.23728	0.373145	0.864032	FALSE	None
ADM5	4	-0.126044	0.128431	4	-0.667047	0.292833	-0.40323	0.126945	0.705193	FALSE	None
ADNP	4	-1.00851	1.41576	4	-0.735956	4.41799	0.291432	0.342645	0.852446	FALSE	None
ADNP2	4	0.240663	0.247497	4	0.133109	0.590791	-0.207838	0.374337	0.864032	FALSE	None
ADO	4	-0.781346	3.26665	4	-0.608406	3.40788	0.11021	0.635499	0.936715	FALSE	None
ADORA1	4	0.539038	0.249741	4	0.670133	0.0764352	-0.142184	0.590627	0.927402	FALSE	None
ADORA2A	4	-0.253898	0.272001	4	-0.60951	0.461336	-0.220513	0.351905	0.855912	FALSE	None
ADORA2B	4	-0.313746	0.0507911	4	-0.397949	0.262273	0.0351921	0.879763	0.986843	FALSE	None
ADORA3	4	-0.276458	0.211036	4	-0.301735	0.224976	0.0598424	0.83434	0.978	FALSE	None
ADPGK	4	-0.2586	0.22085	4	-0.267802	0.673071	0.0661008	0.777049	0.969325	FALSE	None
ADPRH	4	-0.444829	0.622192	4	-0.59366	1.30631	-0.0593246	0.804715	0.974979	FALSE	None
ADPRHL1	4	-0.0143249	0.260522	4	0.0714445	0.160309	0.0454506	0.853707	0.981471	FALSE	None
ADPRHL2	4	0.0997537	0.308668	4	-0.421011	0.596276	-0.473364	0.0781473	0.637519	FALSE	None
ADPRM	4	0.063458	0.083872	4	0.312283	0.162493	0.140014	0.578705	0.924589	FALSE	None
ADRA1A	4	-0.62596	0.918309	4	-0.633904	0.841753	0.143461	0.563793	0.92131	FALSE	None
ADRA1B	4	0.0756123	0.14639	4	-0.357873	1.55802	-0.426801	0.132032	0.711113	FALSE	None
ADRA1D	4	-0.451601	0.863557	4	-0.544827	2.66384	-0.0569391	0.842663	0.97979	FALSE	None
ADRA2A	4	0.163132	0.152327	4	-0.236579	0.929918	-0.416558	0.105997	0.680282	FALSE	None
ADRA2B	4	-0.558374	0.527735	4	-0.473254	1.14849	0.190299	0.486475	0.902159	FALSE	None
ADRA2C	4	0.260729	0.537037	4	0.146991	0.452999	-0.227241	0.372338	0.864005	FALSE	None
ADRB1	4	0.270056	0.294838	4	-0.180555	0.715255	-0.49687	0.0424815	0.530732	FALSE	None
ADRB2	4	-0.423259	0.143236	4	0.0293233	0.163761	0.504779	0.047167	0.548636	FALSE	None
ADRB3	4	0.0932301	0.278058	4	-0.251997	0.707428	-0.346188	0.163502	0.751876	FALSE	None
ADRBK1	4	-0.320177	0.168785	4	-0.31108	0.730265	0.10078	0.737705	0.959853	FALSE	None
ADRBK2	4	-0.0866596	0.0513519	4	-0.0459942	0.328923	0.032078	0.906325	0.991182	FALSE	None
ADRM1	4	-0.849786	1.02746	4	0.0523477	0.887848	0.979917	0.00277279	0.181721	TRUE	Positive
ADSL	4	-2.70938	0.498147	4	-3.10856	0.555706	-0.207571	0.409649	0.876871	FALSE	None
ADSS	4	-2.05049	1.05607	4	-2.69656	0.810636	-0.399066	0.118749	0.697333	FALSE	None
ADSSL1	4	-0.321865	0.107138	4	-0.366978	0.109044	0.0706847	0.761607	0.965978	FALSE	None
ADTRP	4	0.225079	0.144854	4	0.0799509	0.0849116	-0.240878	0.32825	0.847914	FALSE	None
AEBP1	4	-0.369265	0.725584	4	-0.563651	2.01198	-0.136492	0.5933	0.927606	FALSE	None
AEBP2	4	-0.118022	0.164823	4	0.133486	0.147268	0.215247	0.377744	0.864277	FALSE	None
AEN	4	-0.538949	0.238143	4	-0.53212	0.711298	0.169271	0.476561	0.899878	FALSE	None
AES	4	-0.190983	0.140704	4	-0.592869	0.0691605	-0.267809	0.283113	0.823698	FALSE	None
AFAP1	4	0.103214	0.177228	4	0.00786354	0.927973	-0.149983	0.655376	0.942171	FALSE	None
AFAP1L1	4	0.0661811	0.309316	4	-0.0612849	0.534045	-0.159878	0.525936	0.910944	FALSE	None
AFAP1L2	4	-0.294246	0.062156	4	-0.209826	0.160198	0.157267	0.506008	0.907309	FALSE	None
AFF1	4	-0.330504	0.144963	4	-0.626787	0.592769	-0.141969	0.552217	0.919699	FALSE	None
AFF2	4	0.309257	0.123482	4	0.294366	0.275563	-0.167183	0.532837	0.914631	FALSE	None
AFF3	4	0.198889	0.116815	4	0.116767	0.365184	-0.175436	0.489662	0.903757	FALSE	None
AFF4	4	0.294737	0.186323	4	0.364782	0.514798	-0.0938863	0.702461	0.952931	FALSE	None
AFG3L2	4	-2.60525	1.11138	4	-2.51255	1.95272	0.280359	0.361397	0.859809	FALSE	None
AFM	4	0.112445	0.0607926	4	0.307626	0.171607	0.0781501	0.742604	0.961383	FALSE	None
AFMID	4	0.0985455	0.09615	4	-0.187115	0.325927	-0.296733	0.217885	0.788925	FALSE	None
AFP	4	-0.0606506	0.0589607	4	-0.167958	0.262491	-0.095504	0.711847	0.953769	FALSE	None
AFTPH	4	-0.28924	0.120157	4	-0.453796	0.509882	-0.0386616	0.871202	0.985415	FALSE	None
AGA	4	0.115562	0.254591	4	0.158689	1.0339	-0.0427506	0.857018	0.98171	FALSE	None
AGAP1	4	0.817615	0.117475	4	0.410724	0.351062	-0.686593	0.0122557	0.352306	TRUE	Negative
AGAP2	4	-0.24151	0.256065	4	-0.688328	0.761827	-0.285743	0.256277	0.813142	FALSE	None
AGAP3	4	0.0668409	0.463226	4	-0.0540903	0.645227	-0.153581	0.555441	0.920104	FALSE	None
AGBL1	4	-0.0181811	0.530968	4	-0.596975	0.303317	-0.478255	0.0748768	0.630366	FALSE	None
AGBL2	4	-0.192434	0.0427591	4	-0.0941402	0.160185	0.121475	0.625356	0.933837	FALSE	None
AGBL3	4	-0.146884	0.134673	4	-0.0371034	0.306018	0.119541	0.612984	0.931426	FALSE	None
AGBL4	4	-0.0160697	0.161577	4	0.0134615	0.228247	0.00100227	0.996609	0.999797	FALSE	None
AGBL5	4	-0.0986363	0.340475	4	-0.418483	0.455326	-0.236886	0.42387	0.881315	FALSE	None
AGER	4	0.533444	0.285623	4	0.0615607	1.24207	-0.619503	0.0194884	0.40405	FALSE	None
AGFG1	4	0.306011	0.0480337	4	-0.833227	0.150641	-1.06283	0.000207127	0.0390987	TRUE	Negative
AGFG2	4	-0.378496	0.0365026	4	-0.340052	0.497885	0.161243	0.520511	0.90932	FALSE	None
AGGF1	4	-0.486675	0.0337679	4	-0.777961	0.20585	-0.0510867	0.842494	0.97979	FALSE	None
AGK	4	-0.295262	0.425432	4	-0.545286	0.33477	-0.101199	0.723378	0.955108	FALSE	None
AGL	4	0.0186343	0.264583	4	0.1925	0.48004	0.100176	0.725494	0.955646	FALSE	None
AGMAT	4	-0.252661	0.25518	4	-0.460788	0.334689	-0.088812	0.739025	0.960243	FALSE	None
AGMO	4	-0.254359	0.316238	4	-0.366926	1.69267	-0.0312803	0.901236	0.990694	FALSE	None
AGO1	4	-0.597253	0.935411	4	-0.791734	2.20552	-0.0857535	0.724838	0.95545	FALSE	None
AGO2	4	-0.440744	0.0278337	4	-0.341017	0.615156	0.218322	0.390547	0.868373	FALSE	None
AGO3	4	0.0273802	0.379757	4	0.110634	0.350502	0.028999	0.903042	0.991004	FALSE	None
AGO4	4	0.125967	0.114612	4	0.219584	0.0779397	-0.00705922	0.975982	0.998397	FALSE	None
AGPAT1	4	-0.226775	0.0232693	4	-0.441803	1.10915	-0.113376	0.698258	0.952931	FALSE	None
AGPAT2	4	0.0970963	0.539395	4	0.153898	0.245034	-0.0258035	0.92418	0.993578	FALSE	None
AGPAT3	4	0.0554993	0.154246	4	0.0276865	0.44399	-0.0680637	0.770114	0.967823	FALSE	None
AGPAT4	4	0.194457	0.365766	4	0.269415	0.476266	-0.054341	0.820359	0.97594	FALSE	None
AGPAT5	4	-2.01469	0.0392371	4	-2.56861	0.574763	-0.250653	0.38845	0.868373	FALSE	None
AGPAT6	4	-0.481209	0.532274	4	-0.902762	2.23512	-0.288315	0.27624	0.823188	FALSE	None
AGPAT9	4	-0.484036	1.04978	4	-0.301852	0.45243	0.293154	0.305655	0.834512	FALSE	None
AGPS	4	-0.108055	0.318797	4	-0.349031	0.394367	-0.186131	0.438181	0.886204	FALSE	None
AGR2	4	0.216574	0.156252	4	0.276738	0.583381	-0.0669457	0.790893	0.971567	FALSE	None
AGR3	4	0.0123334	0.18207	4	0.269151	0.134698	0.166251	0.542037	0.916298	FALSE	None
AGRN	4	0.106894	0.166199	4	0.069601	0.167663	-0.104659	0.681472	0.950058	FALSE	None
AGRP	4	-0.299231	0.146542	4	-0.506784	0.412296	-0.0816119	0.753782	0.963653	FALSE	None
AGT	4	-0.703036	0.498583	4	-0.77515	0.227543	0.148524	0.549185	0.918506	FALSE	None
AGTPBP1	4	0.0637507	0.122902	4	0.137225	0.125063	-0.000217004	0.999286	0.999954	FALSE	None
AGTR1	4	0.177284	0.0710798	4	-0.298382	0.380401	-0.485534	0.0928905	0.659166	FALSE	None
AGTR2	4	0.0972533	0.0520263	4	0.353484	0.0480013	0.133036	0.582663	0.925437	FALSE	None
AGTRAP	4	-0.182057	0.713073	4	-0.20188	0.938909	-0.0117363	0.961505	0.99652	FALSE	None
AGXT	4	-0.344256	0.582143	4	-0.478277	1.07943	-0.00542865	0.982403	0.998397	FALSE	None
AGXT2	4	-0.141111	0.0686889	4	-0.0394547	0.130429	0.101259	0.693586	0.952522	FALSE	None
AHCTF1	4	-1.67517	2.04189	4	-1.6561	2.79594	0.178325	0.474627	0.899169	FALSE	None
AHCY	4	-3.10254	1.74844	4	-2.57764	3.9601	0.610041	0.0370809	0.508732	FALSE	None
AHCYL1	4	-0.292737	0.276753	4	-0.0259077	0.552624	0.301412	0.225604	0.794248	FALSE	None
AHCYL2	4	-0.003776	0.145345	4	0.0873408	0.30714	0.0423158	0.871552	0.98549	FALSE	None
AHDC1	4	0.12783	0.141653	4	-0.313616	0.0312104	-0.439902	0.0965532	0.663958	FALSE	None
AHI1	3	-0.943115	0.148396	3	-0.682594	0.87828	0.496111	0.102241	0.67216	FALSE	None
AHNAK	4	0.243789	0.172687	4	0.415587	0.150678	0.00761057	0.974283	0.998397	FALSE	None
AHNAK2	NA	NA	NA	NA	NA	NA	NA	NA	NA	NA	None
AHR	4	0.0506232	0.200125	4	0.26184	1.68364	0.116208	0.671697	0.948519	FALSE	None
AHRR	4	-0.0801696	0.0662831	4	-0.336836	0.275435	-0.200424	0.398258	0.871533	FALSE	None
AHSA1	4	0.204245	0.0825644	4	-0.232649	0.603326	-0.460282	0.0673944	0.613379	FALSE	None
AHSA2	4	-0.0623251	0.2941	4	-0.278486	0.12752	-0.174198	0.505742	0.907309	FALSE	None
AHSG	3	-0.380526	0.249743	3	-0.689212	0.346456	-0.110231	0.747891	0.96285	FALSE	None
AHSP	4	0.134494	0.257246	4	0.102656	0.697753	-0.109649	0.710399	0.953769	FALSE	None
AICDA	4	-0.164142	0.181751	4	-0.741692	0.31512	-0.418577	0.127015	0.705193	FALSE	None
AIDA	4	-0.179735	0.325442	4	-0.129514	0.295565	0.0943268	0.693197	0.952522	FALSE	None
AIF1	4	-0.0153375	0.13233	4	0.293991	0.855268	0.231742	0.349879	0.855256	FALSE	None
AIF1L	4	-0.198546	0.258683	4	-0.3144	1.14671	-0.0699071	0.77882	0.969668	FALSE	None
AIFM1	4	-2.30991	1.77092	4	-2.48892	1.07	0.0435973	0.859061	0.981819	FALSE	None
AIFM2	4	-0.0710537	0.208514	4	0.30196	0.464421	0.297799	0.263936	0.818307	FALSE	None
AIFM3	4	-0.178609	0.0410439	4	-0.284681	0.193611	-0.0427227	0.85896	0.981819	FALSE	None
AIG1	4	0.228805	0.0827157	4	0.516266	0.326948	0.105996	0.649325	0.941079	FALSE	None
AIM1	4	0.00331329	0.137324	4	-0.455119	0.633491	-0.389926	0.160223	0.746933	FALSE	None
AIM1L	4	0.0586944	0.329793	4	0.176506	0.203621	0.0382964	0.877358	0.986357	FALSE	None
AIM2	4	-0.303544	0.514512	4	-0.153923	0.591044	0.21871	0.437174	0.886204	FALSE	None
AIMP1	4	-0.179231	0.45772	4	-0.287989	0.521271	-0.0360369	0.882768	0.987104	FALSE	None
AIMP2	4	-0.134112	0.181607	4	-0.0938543	0.547986	0.0570299	0.814856	0.975921	FALSE	None
AIP	4	0.16747	0.215092	4	-0.310301	1.02636	-0.478261	0.0775985	0.637099	FALSE	None
AIPL1	4	-0.147422	0.0830826	4	-0.644616	0.839853	-0.373453	0.138597	0.718335	FALSE	None
AIRE	4	0.331998	0.126017	4	0.47473	0.283894	-0.0554313	0.813381	0.975921	FALSE	None
AJAP1	4	0.115862	0.283326	4	-0.264648	0.0897697	-0.380779	0.148351	0.732127	FALSE	None
AJUBA	4	0.0522016	0.451771	4	-0.507135	0.790189	-0.507193	0.0613976	0.593064	FALSE	None
AK1	4	-0.0959063	0.0773987	4	-0.512232	0.0369459	-0.324957	0.189044	0.771773	FALSE	None
AK2	4	-3.00716	0.191385	4	-2.99026	0.107685	0.183326	0.43467	0.885324	FALSE	None
AK3	4	-0.230395	0.490677	4	-0.347489	1.5748	-0.0382621	0.897862	0.989957	FALSE	None
AK4	4	-0.493186	0.976154	4	-0.160173	1.2685	0.376128	0.120058	0.699667	FALSE	None
AK5	4	0.0306208	0.0492264	4	0.0842231	0.124767	-0.00439247	0.98584	0.998397	FALSE	None
AK7	4	-0.0921005	0.436929	4	-0.259058	0.55243	-0.134708	0.573183	0.923442	FALSE	None
AK8	4	-0.0233302	0.539208	4	-0.338034	0.211999	-0.268117	0.385123	0.867552	FALSE	None
AK9	4	0.402204	0.134682	4	0.332307	0.4997	-0.253888	0.343182	0.852446	FALSE	None
AKAP1	4	-0.427855	0.28252	4	-0.362579	1.28247	0.182291	0.500281	0.904968	FALSE	None
AKAP10	4	0.0318335	0.160885	4	-1.07694	0.105405	-0.923387	0.000915762	0.0978705	TRUE	Negative
AKAP11	4	-0.111069	0.0152897	4	0.134096	0.116239	0.204722	0.397873	0.871397	FALSE	None
AKAP12	4	-0.10802	0.13255	4	0.247232	0.0693836	0.295614	0.222876	0.793459	FALSE	None
AKAP13	4	-0.995868	0.391293	4	-1.46198	0.109488	-0.0943361	0.711225	0.953769	FALSE	None
AKAP14	4	-0.0162143	0.042882	4	0.030978	0.0777672	0.00684024	0.977736	0.998397	FALSE	None
AKAP2	NA	NA	NA	NA	NA	NA	NA	NA	NA	NA	None
AKAP3	3	-0.0920838	0.279162	3	-0.341942	0.568978	-0.193278	0.5074	0.907481	FALSE	None
AKAP4	4	0.247344	0.0331112	4	0.70788	0.375809	0.236923	0.333504	0.84962	FALSE	None
AKAP5	4	-0.146618	0.00504138	4	-0.234686	0.154491	-0.0458009	0.848521	0.981183	FALSE	None
AKAP6	4	-0.383761	0.369702	4	-0.306158	0.529676	0.183896	0.527799	0.911351	FALSE	None
AKAP7	4	0.212927	0.312146	4	0.424741	0.834846	0.0493063	0.831979	0.977123	FALSE	None
AKAP8	4	-0.323879	0.55452	4	-0.633923	1.05293	-0.209883	0.401642	0.873652	FALSE	None
AKAP8L	4	-0.873245	0.204479	4	-0.597912	0.804797	0.492142	0.0613681	0.593064	FALSE	None
AKAP9	4	0.27324	0.138443	4	0.412675	0.0747277	-0.0280005	0.907155	0.991182	FALSE	None
AKIP1	3	-0.0195729	0.589221	3	-0.27229	1.02286	-0.237057	0.394506	0.870544	FALSE	None
AKIRIN1	4	-0.494864	0.0823655	4	0.0254853	1.20724	0.595176	0.0507806	0.557507	FALSE	None
AKIRIN2	4	-1.20155	0.0757146	4	-0.81751	0.208	0.748634	0.0112481	0.349845	TRUE	Positive
AKNA	4	0.121314	0.0553446	4	-0.143306	0.0775441	-0.29527	0.216686	0.787825	FALSE	None
AKNAD1	4	-0.269451	0.075792	4	-0.0047379	0.953485	0.294363	0.273957	0.821331	FALSE	None
AKR1A1	4	-0.328521	0.172425	4	0.499179	0.376493	0.759637	0.0112031	0.349845	TRUE	Positive
AKR1B1	4	-0.26235	0.336287	4	-0.206007	0.417789	0.123867	0.619265	0.932372	FALSE	None
AKR1B10	4	-0.500672	1.3504	4	-0.439559	0.455339	0.195477	0.56678	0.922058	FALSE	None
AKR1B15	NA	NA	NA	NA	NA	NA	NA	NA	NA	NA	None
AKR1C2	NA	NA	NA	NA	NA	NA	NA	NA	NA	NA	None
AKR1C3	4	0.40329	0.423854	4	0.519303	0.464175	-0.105908	0.654991	0.942171	FALSE	None
AKR1C4	NA	NA	NA	NA	NA	NA	NA	NA	NA	NA	None
AKR1D1	4	0.0345639	0.425621	4	0.481706	0.187132	0.318211	0.236841	0.799906	FALSE	None
AKR1E2	4	0.134183	0.684619	4	0.594866	0.128975	0.283958	0.39688	0.871132	FALSE	None
AKR7A2	4	-0.334638	0.768447	4	-0.104527	0.838	0.267451	0.310479	0.836517	FALSE	None
AKR7A3	4	-0.638248	0.336978	4	-0.889464	0.708125	-0.0270533	0.915259	0.992138	FALSE	None
AKT1	4	-0.732927	0.0873151	4	-0.538588	0.165987	0.434465	0.109436	0.688252	FALSE	None
AKT1S1	4	-0.479837	0.806132	4	-0.686884	1.23105	-0.112367	0.639184	0.937976	FALSE	None
AKT2	4	-0.793216	0.170479	4	-0.697322	0.216501	0.349431	0.154897	0.741413	FALSE	None
AKT3	4	0.30582	0.177446	4	0.391129	0.346952	-0.0851529	0.766822	0.967701	FALSE	None
AKTIP	4	-0.595825	0.147892	4	-0.62466	0.456777	0.180967	0.483947	0.901689	FALSE	None
ALAD	4	-0.286272	0.178549	4	-0.00876058	0.179464	0.307981	0.199558	0.77809	FALSE	None
ALAS1	4	-0.227755	0.309413	4	-0.21601	0.564006	0.0589261	0.808529	0.975921	FALSE	None
ALAS2	4	0.143989	0.176587	4	0.624159	0.0967211	0.29625	0.240705	0.799906	FALSE	None
ALB	4	-0.0139428	0.0888795	4	-0.086211	0.439204	-0.0799388	0.749303	0.963038	FALSE	None
ALCAM	4	-0.584425	0.462211	4	-0.435478	0.294123	0.313139	0.255771	0.813142	FALSE	None
ALDH16A1	4	-0.216659	0.588006	4	-0.00711883	0.359144	0.216882	0.38901	0.868373	FALSE	None
ALDH18A1	4	-0.513788	0.324996	4	-0.221235	0.89304	0.40223	0.131156	0.709919	FALSE	None
ALDH1A1	4	-0.35013	0.445337	4	-0.133441	0.946032	0.288261	0.291869	0.827236	FALSE	None
ALDH1A2	4	0.114502	0.319928	4	0.343038	1.3986	0.10508	0.689016	0.951544	FALSE	None
ALDH1A3	4	0.0922221	0.102975	4	0.3834	0.312819	0.164673	0.482107	0.901456	FALSE	None
ALDH1B1	4	-0.595166	0.409692	4	-0.633934	0.371863	0.131751	0.579918	0.925017	FALSE	None
ALDH1L1	4	-0.708536	0.494052	4	-0.662082	0.625316	0.233558	0.344206	0.852583	FALSE	None
ALDH1L2	4	-0.509597	0.490195	4	-0.478645	0.584734	0.188818	0.526592	0.910944	FALSE	None
ALDH2	4	-0.116977	0.228601	4	-0.0913616	0.259202	0.0388993	0.867827	0.985103	FALSE	None
ALDH3A1	3	0.0706714	0.357949	3	-0.0507915	0.526652	-0.154659	0.621801	0.932805	FALSE	None
ALDH3A2	4	0.0417114	0.533793	4	-0.656115	0.989578	-0.618246	0.0150854	0.372134	TRUE	Negative
ALDH3B2	3	-0.52931	0.331629	3	-0.120663	1.25916	0.512334	0.110678	0.688836	FALSE	None
ALDH4A1	4	0.396135	0.0741849	4	0.188732	0.0865049	-0.355365	0.151523	0.736809	FALSE	None
ALDH5A1	4	-0.165438	0.229091	4	-0.11195	0.239678	0.0799658	0.76839	0.967749	FALSE	None
ALDH6A1	4	-0.346601	0.517573	4	-0.152865	0.549562	0.251038	0.332642	0.84962	FALSE	None
ALDH7A1	3	0.147835	0.134802	3	0.0882793	0.0521652	-0.142696	0.621019	0.932671	FALSE	None
ALDH8A1	4	0.0881132	0.160192	4	0.458039	0.660096	0.223191	0.411107	0.877575	FALSE	None
ALDH9A1	4	0.391368	0.642083	4	0.229268	0.349938	-0.320578	0.217037	0.788023	FALSE	None
ALDOA	4	-3.23533	0.447293	4	-3.11955	0.447293	0.257523	0.274246	0.821331	FALSE	None
ALDOB	4	-0.0224598	0.450634	4	-0.0667161	0.546296	-0.0577231	0.812414	0.975921	FALSE	None
ALDOC	4	0.348649	0.0770638	4	0.136775	1.90446	-0.339966	0.234124	0.798751	FALSE	None
ALG1	4	-3.45596	1.41878	4	-3.84109	0.146894	-0.306648	0.278554	0.823698	FALSE	None
ALG10B	NA	NA	NA	NA	NA	NA	NA	NA	NA	NA	None
ALG11	4	-2.18868	1.15916	4	-2.08856	1.23114	0.385645	0.159613	0.745981	FALSE	None
ALG12	4	-0.117319	0.500155	4	-0.141846	1.38308	-0.0240115	0.91868	0.992415	FALSE	None
ALG13	4	-2.42552	3.91466	4	-1.89402	4.7205	0.606401	0.0610033	0.592879	FALSE	None
ALG14	4	-1.93881	1.80916	4	-1.91339	1.48151	0.240566	0.360353	0.859296	FALSE	None
ALG2	4	-3.49728	0.327808	4	-2.81658	0.900508	0.823652	0.011876	0.350255	TRUE	Positive
ALG3	4	0.102708	0.401976	4	-0.435381	0.446022	-0.503769	0.0443353	0.53778	FALSE	None
ALG5	3	-2.03796	1.52353	3	-1.91341	3.66709	0.261255	0.436634	0.886204	FALSE	None
ALG6	4	-0.809435	1.46221	4	-1.28801	1.88232	-0.287706	0.290691	0.826565	FALSE	None
ALG8	4	-1.14142	1.10007	4	-1.70794	0.777199	-0.280661	0.33019	0.848684	FALSE	None
ALG9	4	-0.191185	0.168797	4	-0.318237	0.234949	-0.0489863	0.83997	0.9795	FALSE	None
ALK	4	-0.795079	3.21828	4	-1.15606	2.56193	-0.324163	0.186159	0.770244	FALSE	None
ALKBH1	4	-0.637601	0.116988	4	-0.352763	0.322053	0.443113	0.0747168	0.630366	FALSE	None
ALKBH2	4	0.0511659	0.292753	4	0.473942	0.789665	0.294367	0.232207	0.798137	FALSE	None
ALKBH3	4	0.148077	0.379541	4	0.199047	0.647384	-0.056447	0.847969	0.981183	FALSE	None
ALKBH4	4	-0.278809	0.134683	4	-0.0395154	0.271814	0.267823	0.350822	0.855573	FALSE	None
ALKBH5	4	-0.651743	0.0322624	4	-0.856167	0.104098	0.0839459	0.729368	0.956779	FALSE	None
ALKBH6	4	-0.204288	0.206188	4	-0.234446	0.6944	0.0184069	0.938904	0.995587	FALSE	None
ALKBH7	4	0.0989219	0.165516	4	0.230832	0.526478	0.0350556	0.88192	0.987104	FALSE	None
ALKBH8	4	-0.954822	2.16961	4	-0.1986	0.952531	0.852456	0.0118189	0.350064	TRUE	Positive
ALLC	4	0.125924	0.15944	4	0.0600279	0.168298	-0.1355	0.597915	0.928157	FALSE	None
ALMS1	4	-0.711688	0.573803	4	-0.459912	0.726914	0.421369	0.136046	0.71453	FALSE	None
ALOX12	4	0.268057	0.34914	4	0.443884	0.447432	0.00203263	0.993301	0.999797	FALSE	None
ALOX12B	4	-0.104676	0.0529376	4	-0.227056	0.111981	-0.0883021	0.704243	0.953058	FALSE	None
ALOX15	4	-0.229526	0.884496	4	-0.331305	1.11382	-0.0720898	0.76475	0.967076	FALSE	None
ALOX15B	3	-0.321917	0.105804	3	-0.746499	0.110788	-0.232699	0.425056	0.882066	FALSE	None
ALOX5	4	-0.0487826	0.0549076	4	0.345618	0.352067	0.303857	0.211678	0.783606	FALSE	None
ALOX5AP	4	-0.145713	0.410009	4	-0.564855	1.31016	-0.361292	0.174911	0.761784	FALSE	None
ALOXE3	4	0.0101371	0.0395785	4	-0.390781	0.276796	-0.352361	0.152504	0.737126	FALSE	None
ALPI	4	0.213214	0.121779	4	0.442359	0.0317592	0.0676429	0.784821	0.970904	FALSE	None
ALPK1	4	0.0729664	0.109884	4	0.63939	1.04932	0.388286	0.221063	0.792109	FALSE	None
ALPK2	4	0.0479806	0.096015	4	-0.196621	0.848988	-0.239977	0.360421	0.859296	FALSE	None
ALPK3	4	-0.871162	0.077162	4	-1.11585	0.31107	0.093798	0.714351	0.953769	FALSE	None
ALPL	4	-0.075667	0.0486704	4	-0.198313	0.120893	-0.100806	0.671635	0.948517	FALSE	None
ALPP	NA	NA	NA	NA	NA	NA	NA	NA	NA	NA	None
ALPPL2	NA	NA	NA	NA	NA	NA	NA	NA	NA	NA	None
ALS2	4	-0.285904	0.141148	4	-0.676108	0.69523	-0.230488	0.386591	0.867864	FALSE	None
ALS2CL	4	-0.479372	0.90727	4	-1.00553	0.705213	-0.34811	0.191166	0.771773	FALSE	None
ALS2CR11	4	0.433333	0.122469	4	0.179731	0.210155	-0.410008	0.104055	0.677213	FALSE	None
ALS2CR12	4	-0.42974	2.13817	4	-1.00996	2.50644	-0.560424	0.0409312	0.524756	FALSE	None
ALX1	4	0.429175	0.565644	4	0.157735	0.247161	-0.416597	0.122667	0.700005	FALSE	None
ALX3	4	-0.833746	1.45562	4	-0.813059	0.889903	0.227295	0.400341	0.87349	FALSE	None
ALX4	4	-0.655861	0.901608	4	-0.769706	1.54469	-0.0126657	0.957828	0.99652	FALSE	None
ALYREF	4	-2.46875	0.377266	4	-2.11753	1.10028	0.642303	0.0322303	0.487751	FALSE	None
AMACR	4	0.0905139	0.179502	4	0.197929	0.0807825	0.018186	0.940958	0.995794	FALSE	None
AMBN	4	-0.411493	0.274087	4	-0.732905	0.678594	-0.142272	0.558058	0.920989	FALSE	None
AMBP	4	-0.704682	0.48579	4	-0.119045	0.335647	0.692129	0.0134852	0.361952	TRUE	Positive
AMBRA1	4	0.345614	0.159322	4	0.216045	0.54721	-0.268713	0.271905	0.820499	FALSE	None
AMD1	4	-1.47835	0.901008	4	-1.45615	0.328988	0.359523	0.19834	0.777409	FALSE	None
AMDHD1	4	0.0589877	0.0542294	4	0.118032	0.415251	-0.00639622	0.979571	0.998397	FALSE	None
AMDHD2	4	-1.0727	0.373579	4	-0.973386	1.26108	0.353864	0.172344	0.758324	FALSE	None
AMELX	4	0.613025	0.0725634	4	0.458431	0.324981	-0.401346	0.109523	0.688252	FALSE	None
AMELY	4	0.340037	0.036047	4	0.0858225	0.407157	-0.370427	0.132049	0.711113	FALSE	None
AMER1	4	0.0194815	0.104189	4	0.492155	0.161769	0.339538	0.156653	0.743	FALSE	None
AMER2	4	-0.396764	0.186447	4	-0.861229	1.34662	-0.292076	0.263985	0.818307	FALSE	None
AMER3	4	-0.691201	0.204985	4	-0.642718	0.442811	0.265019	0.286907	0.824618	FALSE	None
AMFR	4	0.00258032	0.299249	4	-0.440968	0.588945	-0.376478	0.122692	0.700005	FALSE	None
AMH	4	-0.215942	0.0444872	4	-0.532198	0.385011	-0.18914	0.469383	0.897285	FALSE	None
AMHR2	4	-0.00342403	0.202556	4	-0.0521704	0.564035	-0.0626748	0.789476	0.971567	FALSE	None
AMICA1	4	-0.244619	0.168971	4	-0.153391	0.477047	0.13819	0.583689	0.925513	FALSE	None
AMIGO1	4	-0.0862578	0.14646	4	-0.599787	0.667513	-0.394719	0.128555	0.70766	FALSE	None
AMIGO2	4	-0.327145	0.530537	4	-0.0205148	0.62248	0.323021	0.184367	0.769574	FALSE	None
AMMECR1	4	0.296274	0.0379222	4	0.622066	0.118743	0.113801	0.633232	0.935898	FALSE	None
AMMECR1L	4	-0.373362	0.186088	4	-0.578425	0.395856	-0.0428154	0.871469	0.98549	FALSE	None
AMN	4	-0.099165	0.133414	4	0.167838	0.170085	0.223699	0.354478	0.857541	FALSE	None
AMN1	4	-0.43949	0.0840626	4	-0.128228	0.202671	0.4005	0.100293	0.668294	FALSE	None
AMOT	4	0.0596715	0.95204	4	-0.152636	0.75264	-0.248565	0.33479	0.84962	FALSE	None
AMOTL1	4	-0.698176	1.8323	4	-0.840649	2.06058	-0.0787627	0.785597	0.970909	FALSE	None
AMOTL2	4	0.307701	0.0327391	4	0.227868	0.205108	-0.21961	0.356318	0.858325	FALSE	None
AMPD1	4	-0.276744	0.162637	4	-0.352218	0.725614	0.0267149	0.922404	0.993262	FALSE	None
AMPD2	4	-0.180189	0.412163	4	-0.167459	0.251147	0.0533774	0.846419	0.980987	FALSE	None
AMPD3	4	-0.160245	0.0836834	4	-0.287812	0.181353	-0.0639326	0.782661	0.97026	FALSE	None
AMPH	4	-0.037449	0.150819	4	-0.0156465	0.579737	0.00570937	0.981144	0.998397	FALSE	None
AMT	4	-0.265786	0.0716524	4	-0.879741	0.570646	-0.419167	0.0974571	0.66526	FALSE	None
AMTN	4	-0.638653	0.217354	4	-0.8696	0.947073	-0.0014608	0.996008	0.999797	FALSE	None
AMZ1	4	0.294585	0.627323	4	0.475049	0.370949	-0.0114657	0.96601	0.996991	FALSE	None
AMZ2	4	-0.100906	0.103229	4	-0.713458	0.171638	-0.472251	0.0594381	0.589856	FALSE	None
ANAPC1	4	-1.68661	1.55195	4	-1.4935	1.67881	0.400683	0.121411	0.700005	FALSE	None
ANAPC10	4	-1.66225	0.57207	4	-2.14808	1.11355	-0.197161	0.42573	0.882153	FALSE	None
ANAPC11	4	-3.59532	0.327045	4	-3.44678	0.688602	0.243441	0.328163	0.847914	FALSE	None
ANAPC13	4	-2.1989	0.204165	4	-1.68547	0.305756	0.872432	0.00235823	0.165019	TRUE	Positive
ANAPC15	4	-1.76599	3.85063	4	-1.59242	3.69418	0.217987	0.390338	0.868373	FALSE	None
ANAPC16	4	-0.071661	0.116772	4	-0.364778	0.178374	-0.234864	0.344426	0.852583	FALSE	None
ANAPC2	4	-2.3477	0.242927	4	-2.20947	0.277666	0.449102	0.0658312	0.610228	FALSE	None
ANAPC4	4	-1.50406	0.367231	4	-0.935534	1.27324	0.855808	0.00348645	0.20758	TRUE	Positive
ANAPC5	4	-1.44573	1.17149	4	-1.87784	0.637084	-0.0965351	0.706504	0.95345	FALSE	None
ANAPC7	4	-0.0136907	0.0580746	4	-0.0734534	1.83706	-0.0790591	0.78755	0.971406	FALSE	None
ANG	4	-0.304698	0.0374924	4	-0.472533	0.180553	-0.0358809	0.879486	0.986824	FALSE	None
ANGEL1	4	-0.277777	0.0953114	4	0.294838	0.164905	0.535496	0.0411022	0.524772	FALSE	None
ANGEL2	4	0.0968345	0.355942	4	0.110497	0.336609	-0.0590472	0.814087	0.975921	FALSE	None
ANGPT1	3	0.288773	0.265905	3	0.122637	0.617233	-0.27014	0.334261	0.84962	FALSE	None
ANGPT2	4	0.340871	0.383372	4	0.494192	0.29367	-0.0481367	0.842349	0.97979	FALSE	None
ANGPT4	4	-0.170625	0.396715	4	-0.0251556	0.502939	0.150805	0.526971	0.910944	FALSE	None
ANGPTL1	4	-0.206958	0.677483	4	-0.423199	0.355484	-0.144902	0.564511	0.92131	FALSE	None
ANGPTL2	4	0.0306855	0.235641	4	-0.00967032	0.478969	-0.0731672	0.761091	0.965978	FALSE	None
ANGPTL3	4	0.197887	0.316783	4	0.162916	1.15489	-0.137635	0.565774	0.921823	FALSE	None
ANGPTL4	4	-0.312626	0.119354	4	-0.978197	1.86798	-0.515823	0.085495	0.648802	FALSE	None
ANGPTL5	4	0.271505	0.135349	4	0.0936695	0.345888	-0.281033	0.256256	0.813142	FALSE	None
ANGPTL6	4	-0.0203721	0.92708	4	-0.133341	1.46342	-0.151419	0.534428	0.914714	FALSE	None
ANGPTL7	4	0.0967901	0.0945498	4	-0.0371174	0.31358	-0.177117	0.454568	0.891971	FALSE	None
ANHX	4	-0.249775	0.220068	4	-0.669506	1.23624	-0.293408	0.284055	0.823698	FALSE	None
ANK1	4	-0.143356	0.187527	4	-0.037831	0.713623	0.124836	0.595463	0.928157	FALSE	None
ANK2	4	-0.608406	0.53629	4	-1.20764	0.649826	-0.323883	0.241403	0.799906	FALSE	None
ANK3	4	-0.00769676	0.414882	4	0.0127815	0.20299	-0.00464119	0.985843	0.998397	FALSE	None
ANKAR	4	-0.213323	0.20287	4	-0.336236	0.650874	-0.0304166	0.895788	0.989847	FALSE	None
ANKDD1A	4	-0.450383	0.600184	4	-0.977532	1.36568	-0.392575	0.109514	0.688252	FALSE	None
ANKDD1B	4	-0.331212	0.156775	4	-0.753711	0.118648	-0.225119	0.371907	0.864005	FALSE	None
ANKEF1	4	-0.0345688	0.107766	4	-0.0735507	0.0414363	-0.0556862	0.828171	0.97664	FALSE	None
ANKFN1	4	-0.317693	0.281899	4	-0.46985	1.35856	-0.0840903	0.746409	0.962232	FALSE	None
ANKFY1	4	-0.451909	0.112347	4	-0.0940601	0.350729	0.442751	0.0840341	0.646762	FALSE	None
ANKH	4	-0.326279	0.966909	4	-0.100195	0.728032	0.281114	0.291654	0.827027	FALSE	None
ANKHD1	NA	NA	NA	NA	NA	NA	NA	NA	NA	NA	None
ANKHD1-EIF4EBP3	4	0.168946	0.385503	4	-0.327421	0.217482	-0.492185	0.0904037	0.656506	FALSE	None
ANKIB1	4	0.245958	0.068772	4	-0.278927	0.116001	-0.552858	0.0302691	0.475533	FALSE	None
ANKK1	4	-0.28412	0.0981906	4	-0.612232	0.319129	-0.175955	0.475277	0.899324	FALSE	None
ANKLE1	4	-0.15055	0.0600215	4	-0.371504	0.379937	-0.144246	0.581277	0.925437	FALSE	None
ANKLE2	4	-2.61705	2.45815	4	-2.8251	3.3448	-0.0100611	0.970459	0.997843	FALSE	None
ANKMY1	4	-0.146305	0.109709	4	-0.691216	0.346515	-0.399815	0.116381	0.695275	FALSE	None
ANKMY2	4	-0.287941	0.179296	4	-0.07724	0.626294	0.260554	0.287294	0.824944	FALSE	None
ANKRA2	4	-0.00976025	0.112743	4	0.00762634	0.25929	-0.0140243	0.954918	0.99652	FALSE	None
ANKRD1	4	-0.01333	0.00854145	4	-0.176823	0.182544	-0.159957	0.505881	0.907309	FALSE	None
ANKRD10	4	0.170524	0.0157134	4	0.457207	0.330627	0.128359	0.610857	0.93086	FALSE	None
ANKRD11	4	-0.00277544	0.220959	4	-1.03587	0.915984	-0.840573	0.0100523	0.331656	TRUE	Negative
ANKRD12	4	0.322808	0.149839	4	0.444106	0.189954	-0.0636627	0.796367	0.971953	FALSE	None
ANKRD13A	4	-0.490559	0.0552817	4	-0.283369	0.301855	0.337894	0.196693	0.773582	FALSE	None
ANKRD13B	4	-0.211212	0.0371095	4	0.277016	0.235743	0.442869	0.0737868	0.630366	FALSE	None
ANKRD13C	4	0.414729	0.0530518	4	0.552295	0.300152	-0.0863555	0.726081	0.955719	FALSE	None
ANKRD13D	4	-0.197449	0.725791	4	-0.0252589	1.24019	0.189816	0.562451	0.92131	FALSE	None
ANKRD16	4	0.12743	0.112003	4	-0.51778	1.13332	-0.598157	0.0318809	0.486331	FALSE	None
ANKRD17	4	-1.04495	0.874506	4	-1.09449	1.46567	0.190335	0.453504	0.891538	FALSE	None
ANKRD18A	NA	NA	NA	NA	NA	NA	NA	NA	NA	NA	None
ANKRD18B	NA	NA	NA	NA	NA	NA	NA	NA	NA	NA	None
ANKRD2	4	0.0633567	0.254363	4	0.424309	0.198787	0.229748	0.383035	0.866324	FALSE	None
ANKRD22	4	0.277495	0.427248	4	0.252624	0.178996	-0.164556	0.540655	0.916125	FALSE	None
ANKRD23	4	-0.334491	0.15621	4	-0.702918	0.804543	-0.199973	0.461744	0.894713	FALSE	None
ANKRD24	4	-0.275647	0.1177	4	-0.776814	0.538264	-0.329948	0.229829	0.796197	FALSE	None
ANKRD26	4	-0.124337	0.277261	4	0.273459	0.818446	0.346258	0.162431	0.750971	FALSE	None
ANKRD27	4	-0.370515	0.223502	4	-0.140163	0.478094	0.300009	0.252365	0.810188	FALSE	None
ANKRD28	4	-0.632243	0.510996	4	-0.704389	0.37067	0.13169	0.614623	0.931791	FALSE	None
ANKRD29	4	0.00756516	0.0374306	4	0.378511	0.253907	0.259562	0.311251	0.837004	FALSE	None
ANKRD30A	3	-0.0619016	0.26045	3	0.228973	0.224492	0.230434	0.414982	0.879028	FALSE	None
ANKRD30B	4	-0.156072	0.0672216	4	0.1549	0.136122	0.279521	0.241167	0.799906	FALSE	None
ANKRD30BL	NA	NA	NA	NA	NA	NA	NA	NA	NA	NA	None
ANKRD31	4	-0.338507	0.263281	4	-0.242355	0.57136	0.187045	0.518848	0.909053	FALSE	None
ANKRD32	4	0.342369	0.206744	4	-0.9158	0.427611	-1.17003	0.000120767	0.0258677	TRUE	Negative
ANKRD33	4	-0.142342	0.249981	4	-0.0398019	0.583694	0.110264	0.635647	0.936855	FALSE	None
ANKRD33B	4	0.318662	0.0685489	4	-0.142369	0.289649	-0.527612	0.0412715	0.524814	FALSE	None
ANKRD34A	4	-0.209891	0.990255	4	-0.115623	0.612521	0.0972255	0.734983	0.959038	FALSE	None
ANKRD34B	4	0.0665518	0.197045	4	-0.394571	0.0685758	-0.42618	0.100599	0.668503	FALSE	None
ANKRD34C	3	-0.693797	0.406363	3	-0.609953	1.09452	0.255119	0.401496	0.873625	FALSE	None
ANKRD35	4	-0.542406	0.395694	4	-0.485264	1.46855	0.175864	0.467376	0.89691	FALSE	None
ANKRD36	NA	NA	NA	NA	NA	NA	NA	NA	NA	NA	None
ANKRD36C	4	-0.600755	0.624329	4	-0.892617	1.05155	-0.0900412	0.728461	0.956079	FALSE	None
ANKRD37	4	0.209137	0.280033	4	-0.00881651	1.39832	-0.294081	0.23978	0.799906	FALSE	None
ANKRD39	4	-0.0354993	0.363302	4	-0.460633	0.105691	-0.352944	0.199617	0.77809	FALSE	None
ANKRD40	4	-0.213259	0.0910669	4	0.237982	0.100705	0.411646	0.108097	0.685173	FALSE	None
ANKRD42	4	0.527402	0.550356	4	0.306753	0.244089	-0.416837	0.157269	0.743	FALSE	None
ANKRD44	4	-0.0490605	0.0972039	4	0.119914	1.11016	0.129388	0.648907	0.941079	FALSE	None
ANKRD45	4	0.236332	0.0810797	4	-0.186586	0.60697	-0.465676	0.125285	0.702512	FALSE	None
ANKRD46	4	-0.447292	0.0800491	4	-0.332353	0.362925	0.24512	0.310426	0.836517	FALSE	None
ANKRD49	4	-2.37788	0.134682	4	-2.00676	0.611538	0.69142	0.015845	0.378041	TRUE	Positive
ANKRD50	4	-0.400712	0.723007	4	-0.465292	0.740548	0.0696279	0.818556	0.975921	FALSE	None
ANKRD52	4	-0.523288	0.0044232	4	-0.583406	0.215624	0.145262	0.551588	0.919254	FALSE	None
ANKRD53	4	-0.329251	0.00509275	4	-0.626027	0.0722417	-0.126245	0.597734	0.928157	FALSE	None
ANKRD54	4	-0.401626	0.404745	4	-0.362717	0.96549	0.157017	0.512933	0.907754	FALSE	None
ANKRD55	4	-0.313035	0.416409	4	-0.266156	0.359127	0.122635	0.656231	0.942832	FALSE	None
ANKRD6	4	0.104208	0.142774	4	-0.204333	0.0185617	-0.322545	0.193553	0.771818	FALSE	None
ANKRD61	4	0.0076412	0.0791293	4	0.236571	0.541021	0.146034	0.550258	0.919024	FALSE	None
ANKRD62	4	0.151234	0.031418	4	0.0921626	0.409911	-0.138996	0.580787	0.925255	FALSE	None
ANKRD63	4	-0.389071	0.0521683	4	-0.561008	0.596922	-0.00175258	0.994887	0.999797	FALSE	None
ANKRD65	4	0.0458727	0.106815	4	-0.0667262	0.250471	-0.139841	0.573651	0.923442	FALSE	None
ANKRD66	4	-0.500828	0.170188	4	-0.617927	0.920116	0.0781857	0.81378	0.975921	FALSE	None
ANKRD7	4	-0.188839	0.0618873	4	-0.558507	0.404538	-0.242708	0.328906	0.8484	FALSE	None
ANKRD9	4	0.133789	0.0984462	4	0.157074	0.0563278	-0.0687452	0.773343	0.968337	FALSE	None
ANKS1A	4	-0.0656267	0.0507476	4	0.139824	0.886406	0.166134	0.514129	0.907987	FALSE	None
ANKS1B	4	-1.02376	2.19047	4	-0.912609	3.32969	0.178415	0.4649	0.895579	FALSE	None
ANKS3	4	0.173438	0.771546	4	0.0213547	1.30073	-0.226101	0.344602	0.852597	FALSE	None
ANKS4B	4	-0.0280008	0.704083	4	-0.364754	0.603048	-0.312236	0.206692	0.782062	FALSE	None
ANKS6	4	-0.307417	0.614223	4	-0.516026	1.53021	-0.156891	0.533708	0.914631	FALSE	None
ANKUB1	4	-0.600756	0.276134	4	-0.431277	0.199733	0.349666	0.157712	0.743124	FALSE	None
ANKZF1	4	-0.307509	0.926236	4	-0.659603	0.453539	-0.214335	0.432893	0.883947	FALSE	None
ANLN	3	-0.928639	0.045671	3	-0.74285	1.109	0.437416	0.169037	0.756919	FALSE	None
ANO1	4	0.0752701	0.317906	4	0.25475	0.326671	0.0919552	0.704189	0.953058	FALSE	None
ANO10	4	-0.0854525	0.192167	4	-0.150113	0.273047	-0.0426347	0.860491	0.982369	FALSE	None
ANO2	4	0.128443	0.929505	4	-0.781317	0.766391	-0.864529	0.00613457	0.271404	TRUE	Negative
ANO3	4	0.0441195	0.114467	4	0.134245	0.215138	0.0214214	0.930541	0.994328	FALSE	None
ANO4	4	-0.0992348	0.281078	4	-0.185499	0.225721	-0.0552789	0.83044	0.97664	FALSE	None
ANO5	3	-0.0249432	1.34457	3	-0.0364078	1.12101	-0.0390004	0.895042	0.989814	FALSE	None
ANO6	4	0.42065	0.0450422	4	0.371017	0.25098	-0.239923	0.329568	0.8484	FALSE	None
ANO7	4	0.209192	0.014306	4	0.210568	0.652052	-0.112353	0.668018	0.946675	FALSE	None
ANO8	4	-0.333869	0.331163	4	-0.055768	1.04469	0.299552	0.212548	0.783955	FALSE	None
ANO9	4	-0.814846	0.972964	4	-0.859332	0.487765	0.179263	0.503541	0.906743	FALSE	None
ANP32A	4	-0.171822	0.0744614	4	-0.808378	0.521485	-0.458379	0.12686	0.705193	FALSE	None
ANP32B	4	-0.922514	0.842837	4	-1.70743	0.680428	-0.495103	0.04832	0.552766	FALSE	None
ANP32D	NA	NA	NA	NA	NA	NA	NA	NA	NA	NA	None
ANP32E	4	-0.0755879	0.454581	4	0.0261126	0.7307	0.0744596	0.753719	0.963653	FALSE	None
ANPEP	4	-0.15175	0.375446	4	-0.16316	0.7364	0.0130334	0.956342	0.99652	FALSE	None
ANTXR1	4	0.424019	0.0719429	4	0.1731	0.143253	-0.401451	0.122324	0.700005	FALSE	None
ANTXR2	4	0.235682	0.208882	4	0.487438	0.0874216	0.0756802	0.771846	0.967823	FALSE	None
ANTXRL	4	0.199834	0.0298127	4	0.441623	0.0766447	0.0830159	0.724708	0.955398	FALSE	None
ANXA1	4	0.0329954	0.1347	4	0.037928	0.745944	-0.0335719	0.893071	0.989189	FALSE	None
ANXA10	4	0.228781	0.0365451	4	-0.00889635	0.279316	-0.314487	0.215666	0.787506	FALSE	None
ANXA11	4	-0.372645	0.262008	4	-0.150677	0.680438	0.309623	0.253567	0.811393	FALSE	None
ANXA13	4	0.266453	0.233893	4	0.282714	0.426761	-0.124183	0.597928	0.928157	FALSE	None
ANXA2	4	-0.652762	1.05837	4	-0.971709	1.10822	-0.143548	0.544574	0.917727	FALSE	None
ANXA2R	4	-0.410326	0.273527	4	-0.0402859	0.982162	0.434492	0.0839895	0.646762	FALSE	None
ANXA3	4	-0.152252	0.541966	4	0.0274757	0.293509	0.177462	0.490604	0.904099	FALSE	None
ANXA4	4	0.224469	0.109129	4	-0.0414613	0.24053	-0.337745	0.2224	0.793382	FALSE	None
ANXA5	4	0.251277	0.124082	4	0.0688322	0.485792	-0.273965	0.27722	0.823698	FALSE	None
ANXA6	4	-0.0539312	0.0406717	4	-0.306054	0.17934	-0.21395	0.383733	0.866523	FALSE	None
ANXA7	4	-0.403613	0.427577	4	-0.593126	0.924401	-0.00799783	0.978765	0.998397	FALSE	None
ANXA9	4	-0.171228	0.632565	4	-0.701778	1.11826	-0.416707	0.152041	0.737126	FALSE	None
AOAH	4	-0.60543	0.119852	4	-0.301274	0.118909	0.458373	0.0623859	0.596789	FALSE	None
AOC1	4	-0.158114	0.216896	4	-0.141664	0.192609	0.0517453	0.827651	0.97664	FALSE	None
AOC2	4	0.221565	0.137913	4	-0.143233	0.701581	-0.404894	0.114102	0.692212	FALSE	None
AOC3	4	-0.578592	0.688493	4	-0.67874	0.989186	0.0580077	0.815662	0.975921	FALSE	None
AOX1	4	-0.0344137	0.147002	4	-0.264176	0.246785	-0.198539	0.400981	0.873625	FALSE	None
AP001816.1	4	-0.166281	0.537505	4	-0.587983	0.404685	-0.3168	0.199562	0.77809	FALSE	None
AP003774.4	4	0.0552758	0.125114	4	0.0401638	0.275727	-0.0663127	0.779998	0.969711	FALSE	None
AP1AR	4	-0.384528	0.608751	4	-0.078124	1.69725	0.355373	0.15993	0.746737	FALSE	None
AP1B1	3	-0.274985	0.0384206	3	-0.156638	0.276116	0.17031	0.575242	0.923702	FALSE	None
AP1G1	4	-0.283867	0.356882	4	-0.317957	0.409669	0.0620339	0.794869	0.971567	FALSE	None
AP1G2	4	-0.777054	2.28365	4	-0.914968	1.87217	-0.0701683	0.775001	0.968476	FALSE	None
AP1M1	4	-0.682345	0.0438816	4	-0.365087	0.222619	0.503871	0.0426701	0.531076	FALSE	None
AP1M2	4	-0.0109336	0.339866	4	-0.111571	0.902057	-0.106226	0.697597	0.952931	FALSE	None
AP1S1	4	0.233726	0.116236	4	0.305258	0.893576	-0.0597689	0.80726	0.975921	FALSE	None
AP1S2	4	0.0825446	0.135285	4	-0.0806888	0.258671	-0.200246	0.481174	0.900847	FALSE	None
AP1S3	4	-0.0246884	0.83245	4	-0.426036	1.07031	-0.355443	0.15497	0.741458	FALSE	None
AP2A1	4	-0.258942	0.0798009	4	-0.636695	0.0619387	-0.222121	0.385386	0.867804	FALSE	None
AP2A2	4	0.0556821	0.0973189	4	0.0266168	0.321498	-0.0779514	0.758259	0.965606	FALSE	None
AP2B1	4	-0.362946	0.0584684	4	-0.92519	0.975445	-0.346546	0.250335	0.807954	FALSE	None
AP2M1	4	-1.48243	1.62847	4	-2.27462	2.09395	-0.584098	0.0565189	0.579114	FALSE	None
AP2S1	4	-2.93306	1.12232	4	-3.38747	1.00261	-0.301405	0.247837	0.805616	FALSE	None
AP3B1	4	-0.2857	0.156504	4	-0.269094	0.154226	0.0999641	0.701463	0.952931	FALSE	None
AP3B2	4	-0.0734957	0.108624	4	-0.117781	0.244529	-0.0344624	0.886947	0.988044	FALSE	None
AP3D1	4	-0.734198	0.0214513	4	-0.228364	0.215544	0.681109	0.00967354	0.326979	TRUE	Positive
AP3M1	4	-0.273733	0.0393823	4	-0.579704	0.312694	-0.154442	0.549078	0.918506	FALSE	None
AP3M2	4	-0.420065	0.199596	4	-0.655589	0.92526	-0.0605365	0.803304	0.974596	FALSE	None
AP3S1	4	-0.895704	1.3094	4	-0.780975	0.883794	0.291454	0.268365	0.819273	FALSE	None
AP3S2	3	0.356209	0.523581	3	0.174322	0.311644	-0.327072	0.269455	0.819399	FALSE	None
AP4B1	4	-0.0538029	0.332168	4	-0.909733	1.50158	-0.730684	0.0225102	0.427547	FALSE	None
AP4E1	4	0.322859	0.015061	4	0.527898	0.513803	0.00365798	0.989041	0.998613	FALSE	None
AP4M1	4	-0.272168	0.483433	4	-0.156257	1.37017	0.163795	0.496962	0.904968	FALSE	None
AP4S1	4	0.0698107	0.672751	4	-0.0184614	1.54788	-0.123565	0.659477	0.944406	FALSE	None
AP5B1	4	-0.126327	0.526298	4	-0.661485	0.750796	-0.417635	0.152052	0.737126	FALSE	None
AP5M1	4	-0.0024209	0.0344302	4	-0.0594384	0.0987869	-0.0810049	0.738707	0.960243	FALSE	None
AP5S1	4	-0.089035	0.930082	4	0.167731	0.737956	0.194691	0.440242	0.887049	FALSE	None
AP5Z1	4	-0.232318	0.37188	4	-0.621349	0.246534	-0.246096	0.365406	0.862285	FALSE	None
APAF1	4	-0.187652	0.480427	4	-0.332711	3.19613	-0.179812	0.559237	0.921253	FALSE	None
APBA1	4	-0.0638559	0.409942	4	-0.0932776	0.93162	-0.0263962	0.910183	0.99134	FALSE	None
APBA2	4	-0.199845	0.358513	4	-0.397864	1.24224	-0.133233	0.649464	0.941079	FALSE	None
APBA3	4	-0.422085	0.492072	4	-0.61287	0.678858	-0.0238164	0.92163	0.992927	FALSE	None
APBB1	4	-0.498735	0.518941	4	-0.419162	1.09613	0.181005	0.442562	0.888305	FALSE	None
APBB1IP	4	0.163875	0.0953156	4	-0.0910382	0.304045	-0.297976	0.219149	0.789565	FALSE	None
APBB2	4	0.113228	0.359366	4	-0.108722	1.2072	-0.257059	0.37488	0.864032	FALSE	None
APBB3	4	0.127525	0.109998	4	-0.0372402	0.540997	-0.210879	0.373071	0.864032	FALSE	None
APC	4	-0.146828	0.195143	4	-0.707909	0.286393	-0.416177	0.121167	0.700005	FALSE	None
APC2	4	-0.66008	0.19124	4	-0.116537	0.15102	0.673262	0.0125166	0.356308	TRUE	Positive
APCDD1	4	0.0703231	0.103784	4	-0.0080764	0.15395	-0.12431	0.601368	0.928157	FALSE	None
APCDD1L	4	0.147055	0.00669819	4	0.0461464	0.423095	-0.17465	0.484489	0.901689	FALSE	None
APCS	4	-0.153369	0.0637522	4	-0.110667	0.570891	0.0713734	0.778267	0.96945	FALSE	None
APEH	4	-0.185025	0.391789	4	-0.0961715	0.178855	0.11682	0.659402	0.944406	FALSE	None
APEX1	4	-3.11898	0.139783	4	-3.39361	0.129707	-0.154014	0.525015	0.910452	FALSE	None
APEX2	4	-2.77718	0.481663	4	-3.07239	0.732729	-0.110219	0.712736	0.953769	FALSE	None
APH1A	4	-0.0703326	0.295247	4	-0.240384	0.454868	-0.131263	0.580019	0.925017	FALSE	None
APH1B	4	-0.832014	0.0587095	4	-0.991845	0.086445	0.171361	0.465832	0.896152	FALSE	None
API5	4	-1.18134	0.549169	4	-1.99888	0.746802	-0.472981	0.113741	0.692212	FALSE	None
APIP	4	-0.209107	0.924143	4	-0.33921	0.972977	-0.107683	0.670568	0.948091	FALSE	None
APLF	4	0.0111743	0.230898	4	0.158722	0.761612	0.0873604	0.712294	0.953769	FALSE	None
APLN	4	0.0155331	0.531609	4	0.0109791	1.47481	-0.0389727	0.88342	0.98725	FALSE	None
APLNR	4	-0.715395	0.638087	4	-0.733829	0.981727	0.166811	0.516488	0.90883	FALSE	None
APLP1	4	-0.266664	0.180794	4	-0.513703	0.609266	-0.131892	0.608057	0.930021	FALSE	None
APLP2	4	-0.0785783	0.339481	4	0.157132	0.291418	0.189927	0.448345	0.890411	FALSE	None
APMAP	4	0.308359	0.160531	4	0.0459945	0.287092	-0.363477	0.175892	0.762431	FALSE	None
APOA1	4	0.409469	0.0761152	4	0.832893	0.668765	0.136627	0.575813	0.923977	FALSE	None
APOA1BP	4	-0.110273	0.68386	4	-0.430658	1.15064	-0.294084	0.232926	0.798751	FALSE	None
APOA2	4	-0.381051	0.18185	4	-0.313436	0.918701	0.180333	0.482072	0.901456	FALSE	None
APOA4	3	-0.385397	0.040887	3	0.0396761	2.30301	0.48045	0.186146	0.770244	FALSE	None
APOA5	4	-0.062319	0.0612008	4	-0.0420075	0.248863	0.00501413	0.985061	0.998397	FALSE	None
APOB	4	0.648643	0.161635	4	0.479414	0.492802	-0.433355	0.0790425	0.638277	FALSE	None
APOBEC1	4	0.0428235	0.423773	4	-0.0836769	0.358214	-0.145349	0.567091	0.922251	FALSE	None
APOBEC2	4	-0.0958414	0.359926	4	-0.0566147	1.21128	0.0213307	0.929838	0.99417	FALSE	None
APOBEC3A	4	0.157798	0.0591635	4	0.398546	0.247292	0.0983951	0.704582	0.953099	FALSE	None
APOBEC3B	4	0.255291	0.0487314	4	-0.00166496	0.108061	-0.341898	0.156274	0.742385	FALSE	None
APOBEC3C	4	0.0287449	0.174536	4	-0.208056	2.20832	-0.262787	0.378582	0.864309	FALSE	None
APOBEC3D	4	0.0964807	0.0332548	4	0.19673	0.0202649	0.00634358	0.978242	0.998397	FALSE	None
APOBEC3F	4	0.508542	0.0851517	4	0.389425	0.332964	-0.329661	0.187186	0.770594	FALSE	None
APOBEC3G	4	-0.108368	0.412932	4	-0.074264	1.30784	0.0427831	0.870046	0.985379	FALSE	None
APOBEC3H	4	-0.0101535	0.278536	4	0.0274798	0.615312	0.00541679	0.982673	0.998397	FALSE	None
APOBEC4	4	-0.573038	0.2765	4	-0.855992	0.787583	-0.0337589	0.907346	0.991182	FALSE	None
APOBR	3	-0.0276811	0.137417	3	0.0370349	0.367347	0.0310487	0.916537	0.992274	FALSE	None
APOC1	4	-0.269721	0.299326	4	-0.517537	0.938739	-0.124888	0.601363	0.928157	FALSE	None
APOC3	4	-0.0600377	0.0925265	4	0.0518836	0.152658	0.0790005	0.7566	0.964624	FALSE	None
APOC4	4	0.255981	0.381025	4	0.0301293	0.265592	-0.311729	0.213521	0.785398	FALSE	None
APOD	4	-0.115088	0.155641	4	-0.0728619	0.0232339	0.0440729	0.860452	0.982369	FALSE	None
APOE	4	0.0362413	0.0996408	4	-0.115933	0.310613	-0.168476	0.506874	0.907481	FALSE	None
APOF	4	-0.451681	0.68106	4	-0.264887	0.21355	0.281862	0.327672	0.847574	FALSE	None
APOH	4	0.0529132	0.109174	4	-0.354104	0.176539	-0.374982	0.1224	0.700005	FALSE	None
APOL1	4	0.0630984	0.0465025	4	0.258569	0.157758	0.0974639	0.691261	0.952476	FALSE	None
APOL2	4	-0.229594	0.0956052	4	-0.786684	0.844141	-0.395612	0.134661	0.713305	FALSE	None
APOL3	4	-0.0268309	2.47789	4	-0.436413	3.19303	-0.555962	0.0397768	0.521689	FALSE	None
APOL4	NA	NA	NA	NA	NA	NA	NA	NA	NA	NA	None
APOL5	4	0.340791	0.204825	4	0.210142	0.224254	-0.271651	0.277425	0.823698	FALSE	None
APOL6	4	0.0848214	0.103715	4	-0.0100252	0.084627	-0.146116	0.569566	0.922957	FALSE	None
APOLD1	4	-1.01694	0.407603	4	-0.926044	0.862019	0.364556	0.144081	0.726259	FALSE	None
APOM	4	-0.186098	0.509324	4	-0.136848	1.8807	0.0637761	0.80049	0.973506	FALSE	None
APOO	4	0.27335	0.272383	4	0.641034	0.395378	0.146625	0.544306	0.917573	FALSE	None
APOOL	4	0.0289191	0.146238	4	0.180828	0.544364	0.0847689	0.721392	0.954942	FALSE	None
APOPT1	NA	NA	NA	NA	NA	NA	NA	NA	NA	NA	None
APP	4	0.010129	0.13029	4	-0.0709494	0.155325	-0.101465	0.668975	0.947373	FALSE	None
APPBP2	4	-0.311939	0.0288666	4	-0.630011	0.249521	-0.150169	0.555793	0.920104	FALSE	None
APPL1	4	-0.536179	0.34987	4	-0.526974	0.699628	0.164288	0.4845	0.901689	FALSE	None
APPL2	4	0.380127	0.503228	4	0.117627	1.47025	-0.4004	0.100297	0.668294	FALSE	None
APRT	4	-0.334617	0.278415	4	-0.320354	0.338608	0.109401	0.649927	0.941079	FALSE	None
APTX	4	-0.61695	1.49277	4	-0.659807	2.20646	-0.013634	0.95373	0.99652	FALSE	None
AQP1	4	-0.505249	1.44703	4	-0.399797	1.01109	0.145915	0.563037	0.92131	FALSE	None
AQP10	4	-0.625826	0.163895	4	-0.801614	0.122915	0.0751442	0.751026	0.963653	FALSE	None
AQP11	4	0.0113283	0.299818	4	-0.302854	0.134373	-0.281298	0.27426	0.821331	FALSE	None
AQP2	4	-0.309433	0.505368	4	-0.565355	0.217587	-0.121168	0.675125	0.948894	FALSE	None
AQP3	4	-0.562975	0.755795	4	-0.745808	0.084869	0.010581	0.9693	0.997507	FALSE	None
AQP4	4	0.0245822	0.401388	4	-0.259355	0.213935	-0.260961	0.329767	0.8484	FALSE	None
AQP5	4	-0.687593	0.571671	4	-0.8889	0.298465	0.0462737	0.858732	0.981819	FALSE	None
AQP6	4	0.0917709	0.33431	4	1.05702	0.89871	0.695226	0.0206677	0.413014	FALSE	None
AQP8	4	-0.133694	0.373557	4	0.0998318	0.630781	0.207744	0.396643	0.871132	FALSE	None
AQP9	4	-0.102446	0.270408	4	-0.422802	0.202428	-0.249758	0.306761	0.835254	FALSE	None
AQPEP	4	-0.875427	1.42351	4	-0.934436	3.00036	0.0191224	0.943268	0.996084	FALSE	None
AQR	4	-3.05634	1.23972	4	-2.86429	1.24969	0.359661	0.165151	0.753355	FALSE	None
AR	4	-0.124329	0.106671	4	0.469461	0.908021	0.495637	0.0541698	0.573501	FALSE	None
ARAF	4	0.028702	0.237729	4	0.413072	0.174665	0.264444	0.331866	0.84962	FALSE	None
ARAP1	4	-0.13223	0.339977	4	-0.281889	0.502338	-0.110617	0.643203	0.93901	FALSE	None
ARAP2	4	0.0971138	0.0420282	4	0.128299	0.366861	-0.0451182	0.853549	0.981471	FALSE	None
ARAP3	4	0.332238	0.0427245	4	-0.013246	0.629148	-0.438503	0.0905016	0.656506	FALSE	None
ARC	4	-0.247895	0.232783	4	-0.501394	0.0170328	-0.127934	0.633041	0.935898	FALSE	None
ARCN1	4	-1.78395	1.47636	4	-1.90696	1.48844	0.116549	0.625677	0.933995	FALSE	None
AREL1	4	-0.375889	0.158636	4	-0.247615	0.241139	0.226121	0.399668	0.872562	FALSE	None
ARF1	4	-1.56358	0.67354	4	-1.70717	0.537769	0.198654	0.44343	0.888682	FALSE	None
ARF3	4	-0.534149	0.399191	4	-1.15991	0.159903	-0.329289	0.257024	0.813142	FALSE	None
ARF4	4	-0.607754	0.183866	4	-0.575355	0.494564	0.215728	0.375444	0.864032	FALSE	None
ARF5	4	-0.455247	0.282188	4	-0.0786337	0.370019	0.4538	0.0764477	0.632467	FALSE	None
ARF6	4	0.00984066	0.0390979	4	-0.569409	0.324915	-0.494048	0.0640604	0.603912	FALSE	None
ARFGAP1	4	-0.00691844	0.290119	4	-0.231313	0.227785	-0.200975	0.440537	0.887148	FALSE	None
ARFGAP2	4	-0.740066	0.299039	4	-0.839612	0.763858	0.127908	0.603962	0.929588	FALSE	None
ARFGAP3	4	-0.133316	0.434043	4	-0.269681	0.401074	-0.0767881	0.751973	0.963653	FALSE	None
ARFGEF1	4	-0.426403	0.205629	4	-0.488628	0.222469	0.0932952	0.691398	0.952476	FALSE	None
ARFGEF2	4	-0.0310613	0.118788	4	-0.468159	0.115285	-0.365416	0.130896	0.709804	FALSE	None
ARFIP1	4	-0.123538	0.0597351	4	0.10448	0.200894	0.199313	0.421652	0.880838	FALSE	None
ARFIP2	4	-0.0684266	0.156947	4	-0.335912	0.269435	-0.214272	0.36613	0.862548	FALSE	None
ARFRP1	4	-1.24288	0.443755	4	-1.12879	1.69745	0.368665	0.176808	0.763823	FALSE	None
ARG1	3	0.0782067	0.208051	3	0.285299	1.13261	0.112186	0.692301	0.952522	FALSE	None
ARG2	4	0.174212	0.0987178	4	0.607381	0.408459	0.241158	0.335895	0.84985	FALSE	None
ARGFX	4	-0.897561	0.142206	4	-0.670894	1.11194	0.473135	0.0724852	0.625891	FALSE	None
ARGLU1	4	-1.7207	0.889903	4	-1.35176	2.12271	0.60194	0.0308126	0.478533	FALSE	None
ARHGAP1	4	-0.072897	0.216705	4	-0.343731	0.569006	-0.212649	0.379649	0.864518	FALSE	None
ARHGAP10	4	-0.260391	0.181825	4	-0.378618	0.212973	-0.0162459	0.94472	0.996084	FALSE	None
ARHGAP11A	4	-0.509874	0.0710885	4	-0.384773	0.37926	0.26799	0.263685	0.817828	FALSE	None
ARHGAP12	4	-0.17468	0.420941	4	-0.543628	0.553586	-0.279555	0.242327	0.799906	FALSE	None
ARHGAP15	4	-0.233673	0.231065	4	-0.504346	0.139676	-0.141523	0.572197	0.923442	FALSE	None
ARHGAP17	3	-0.486384	0.42521	3	-0.593769	0.564302	0.0791484	0.775035	0.968476	FALSE	None
ARHGAP18	4	-0.139843	0.10616	4	-0.166734	0.22295	0.00522784	0.982483	0.998397	FALSE	None
ARHGAP19	4	0.0665215	0.622436	4	-0.366661	0.430009	-0.397338	0.220774	0.79201	FALSE	None
ARHGAP20	4	-0.519363	0.085578	4	-0.920437	0.18473	-0.142535	0.541468	0.916298	FALSE	None
ARHGAP21	4	0.218278	0.44506	4	0.180356	0.350232	-0.158814	0.51713	0.909009	FALSE	None
ARHGAP22	4	-0.363347	0.459255	4	-0.182787	0.746359	0.267094	0.283986	0.823698	FALSE	None
ARHGAP23	4	-0.298005	0.424922	4	-0.358023	0.398429	0.0474011	0.850495	0.981471	FALSE	None
ARHGAP24	4	-0.108888	0.31297	4	-0.277012	1.06565	-0.121002	0.615181	0.931791	FALSE	None
ARHGAP25	4	0.219536	0.0627558	4	0.165514	0.456254	-0.162982	0.541704	0.916298	FALSE	None
ARHGAP26	4	-0.201134	0.214565	4	0.28863	0.103969	0.439958	0.0946523	0.661549	FALSE	None
ARHGAP27	4	-0.107809	0.29392	4	-0.783717	0.244794	-0.519236	0.0888081	0.654839	FALSE	None
ARHGAP28	4	-0.386678	0.753855	4	-0.961961	2.46491	-0.487583	0.0910111	0.65816	FALSE	None
ARHGAP29	4	-0.0197874	0.630753	4	-0.219838	1.3936	-0.183694	0.436796	0.886204	FALSE	None
ARHGAP30	4	-0.303344	0.559472	4	-0.557918	1.45809	-0.194117	0.416299	0.879518	FALSE	None
ARHGAP31	4	-0.0851902	0.481546	4	-0.527929	0.570088	-0.346653	0.174962	0.761784	FALSE	None
ARHGAP32	4	0.093971	0.0398506	4	-0.134169	0.296352	-0.248778	0.294704	0.828585	FALSE	None
ARHGAP33	4	-0.487401	0.381618	4	-0.314403	0.197005	0.307765	0.230869	0.79725	FALSE	None
ARHGAP35	4	-0.248699	0.452492	4	-0.823369	0.624243	-0.44643	0.0709061	0.622387	FALSE	None
ARHGAP36	4	0.56772	0.0224628	4	0.552185	0.0751047	-0.266573	0.269776	0.819399	FALSE	None
ARHGAP39	4	-0.133167	0.0242358	4	0.141057	0.0271842	0.233272	0.336167	0.849955	FALSE	None
ARHGAP4	4	0.444725	0.0585837	4	0.195004	0.0776279	-0.408002	0.102524	0.672165	FALSE	None
ARHGAP42	3	-0.777403	0.033075	3	-0.576457	0.382971	0.436198	0.138518	0.718335	FALSE	None
ARHGAP44	4	0.00215897	0.0727511	4	0.262107	0.344903	0.178172	0.454447	0.891971	FALSE	None
ARHGAP5	4	-0.106217	0.136336	4	-0.654652	0.24924	-0.423208	0.115685	0.693415	FALSE	None
ARHGAP6	4	0.2742	0.0167327	4	0.0555121	0.0288856	-0.31896	0.185583	0.770244	FALSE	None
ARHGAP8	4	-0.361496	0.453008	4	-0.841339	0.732323	-0.315117	0.189761	0.771773	FALSE	None
ARHGAP9	4	-0.34876	0.272127	4	-0.296458	0.216025	0.161725	0.514393	0.908012	FALSE	None
ARHGDIA	4	-0.621021	0.638791	4	0.0403025	0.82327	0.708301	0.0105932	0.339948	TRUE	Positive
ARHGDIB	4	0.0859422	0.0227543	4	0.0457881	0.153549	-0.100257	0.675511	0.948894	FALSE	None
ARHGDIG	4	-0.451474	0.307926	4	-0.239056	0.779259	0.28449	0.22971	0.796197	FALSE	None
ARHGEF1	4	-0.918433	1.58308	4	-0.676586	2.13003	0.302547	0.24092	0.799906	FALSE	None
ARHGEF10	4	0.204224	0.559596	4	-0.0556304	1.39058	-0.31404	0.211805	0.783606	FALSE	None
ARHGEF10L	4	-0.106854	0.0491889	4	-0.679689	0.652407	-0.455831	0.0749774	0.630366	FALSE	None
ARHGEF11	4	0.13287	0.538647	4	0.237061	0.733128	0.00260703	0.991185	0.999202	FALSE	None
ARHGEF12	4	0.346388	0.232652	4	0.211612	1.25553	-0.272464	0.269492	0.819399	FALSE	None
ARHGEF15	4	-0.092591	0.274229	4	0.169588	0.812734	0.219718	0.355621	0.858018	FALSE	None
ARHGEF16	4	-0.311512	0.338283	4	-0.316271	0.545487	0.084512	0.741448	0.960808	FALSE	None
ARHGEF17	3	-0.419748	0.208722	3	-0.374274	0.2035	0.175672	0.53862	0.915549	FALSE	None
ARHGEF18	4	0.124243	0.140016	4	0.147372	0.0768811	-0.0644048	0.788482	0.971406	FALSE	None
ARHGEF19	4	-0.0954047	0.296484	4	-0.00547548	0.155226	0.0808396	0.763468	0.966685	FALSE	None
ARHGEF2	4	-0.484469	0.0675503	4	-0.327992	0.644341	0.306525	0.260759	0.815454	FALSE	None
ARHGEF25	4	-0.480051	0.666459	4	-0.358082	0.63652	0.255829	0.303664	0.833627	FALSE	None
ARHGEF26	4	-0.283092	0.0785214	4	-0.162326	0.141495	0.181693	0.438565	0.886281	FALSE	None
ARHGEF28	4	-0.00500314	0.426313	4	-0.137182	0.44021	-0.133411	0.602594	0.928825	FALSE	None
ARHGEF3	4	0.140549	0.247928	4	-0.365102	0.489934	-0.485818	0.0878055	0.651335	FALSE	None
ARHGEF33	3	0.208211	0.0603764	3	0.096761	0.229439	-0.207277	0.475219	0.899324	FALSE	None
ARHGEF37	4	-0.453397	0.412778	4	-0.131603	0.389043	0.42141	0.128231	0.70766	FALSE	None
ARHGEF38	4	-0.0315946	0.182316	4	-0.00593884	0.167207	0.00267568	0.990881	0.99917	FALSE	None
ARHGEF39	4	-0.36247	0.445557	4	-0.697496	0.537368	-0.200344	0.407497	0.876548	FALSE	None
ARHGEF4	NA	NA	NA	NA	NA	NA	NA	NA	NA	NA	None
ARHGEF40	4	-0.768219	0.169678	4	-1.34372	0.956398	-0.278731	0.269561	0.819399	FALSE	None
ARHGEF5	4	-0.108917	0.364328	4	-0.852802	1.24671	-0.600016	0.0238267	0.438264	FALSE	None
ARHGEF6	4	0.234019	0.154722	4	0.475115	0.179941	0.069114	0.768881	0.967823	FALSE	None
ARHGEF7	4	0.109818	1.63519	4	-0.325807	1.39538	-0.50971	0.052545	0.567541	FALSE	None
ARHGEF9	4	-0.292463	0.647867	4	0.104547	1.14626	0.396287	0.114512	0.692212	FALSE	None
ARID1A	4	-0.0212995	0.243828	4	0.0337373	0.383748	0.0266624	0.911551	0.991601	FALSE	None
ARID1B	4	-0.000378262	0.0525124	4	-0.0578928	0.210189	-0.0804612	0.744396	0.961678	FALSE	None
ARID2	4	0.270883	0.0225354	4	1.13994	0.086967	0.556861	0.0268619	0.460243	FALSE	None
ARID3A	4	0.0319443	0.0777353	4	0.391996	0.453078	0.24471	0.314965	0.8404	FALSE	None
ARID3B	4	-1.72264	0.307013	4	-1.8442	0.338636	0.250378	0.366244	0.862548	FALSE	None
ARID3C	4	-0.410106	0.335726	4	-0.885771	0.565734	-0.266444	0.298004	0.830745	FALSE	None
ARID4A	4	0.704063	0.122683	4	0.347362	0.4024	-0.59976	0.0194476	0.40405	FALSE	None
ARID4B	4	0.446276	0.485124	4	-0.0577262	0.303586	-0.60293	0.0319666	0.486331	FALSE	None
ARID5A	4	-0.482408	0.231426	4	-0.438097	0.272747	0.19127	0.43966	0.88655	FALSE	None
ARID5B	4	-0.252656	0.0692489	4	-0.315565	0.245692	0.0215205	0.935309	0.995134	FALSE	None
ARIH1	4	-1.83083	0.851147	4	-1.33672	1.8972	0.760906	0.0136746	0.361952	TRUE	Positive
ARIH2	4	0.188025	0.125675	4	-0.435431	0.557021	-0.598597	0.0219777	0.42376	FALSE	None
ARIH2OS	4	-0.563119	0.177934	4	-0.575997	0.636928	0.177722	0.509249	0.907481	FALSE	None
ARL1	4	-0.0565722	0.0843719	4	0.321248	0.605511	0.290445	0.249152	0.807101	FALSE	None
ARL10	3	-0.0178846	1.00332	3	0.377687	0.441826	0.295047	0.364548	0.861071	FALSE	None
ARL11	4	-0.478339	0.45576	4	-0.388024	0.688781	0.221974	0.355883	0.858273	FALSE	None
ARL13A	4	0.288174	0.00647331	4	0.234544	0.207453	-0.190733	0.431694	0.883509	FALSE	None
ARL13B	4	-0.0284409	0.250291	4	0.266703	0.558337	0.218037	0.44558	0.889544	FALSE	None
ARL14	4	-0.0696096	0.142368	4	0.404699	0.385007	0.375991	0.202235	0.779185	FALSE	None
ARL14EP	4	0.0702513	0.366155	4	-0.866222	0.158068	-0.806048	0.00618514	0.27227	TRUE	Negative
ARL15	4	0.626352	0.167866	4	0.00937451	0.538416	-0.780291	0.00581666	0.264673	TRUE	Negative
ARL16	4	-0.623176	0.137102	4	-0.844116	0.345661	0.0202321	0.932347	0.994635	FALSE	None
ARL2	4	-3.66436	0.916809	4	-3.61744	1.1355	0.137146	0.566727	0.922058	FALSE	None
ARL2BP	NA	NA	NA	NA	NA	NA	NA	NA	NA	NA	None
ARL3	4	0.0799706	0.179713	4	0.407617	0.262642	0.196134	0.411688	0.877609	FALSE	None
ARL4A	NA	NA	NA	NA	NA	NA	NA	NA	NA	NA	None
ARL4C	4	0.108908	0.107852	4	-0.171187	0.10064	-0.306666	0.255383	0.813142	FALSE	None
ARL4D	4	-0.143931	0.114932	4	0.136228	0.521942	0.256524	0.284638	0.823698	FALSE	None
ARL5A	3	-0.503243	0.459959	3	-0.689378	0.331217	0.00172682	0.995115	0.999797	FALSE	None
ARL5B	4	-0.11488	0.0913801	4	0.348236	0.137086	0.381776	0.153226	0.737534	FALSE	None
ARL5C	4	-0.271326	0.552404	4	-0.670549	1.45119	-0.309549	0.204497	0.781306	FALSE	None
ARL6	3	0.156251	0.52829	3	0.134726	0.141418	-0.108715	0.720492	0.954883	FALSE	None
ARL6IP1	4	0.24557	0.209802	4	0.401586	0.0554116	-0.00224077	0.992651	0.999746	FALSE	None
ARL6IP4	4	-0.477147	1.05855	4	-0.988354	0.935341	-0.363824	0.174191	0.760691	FALSE	None
ARL6IP5	4	-0.0365195	0.0643026	4	-0.169772	0.227486	-0.125363	0.616777	0.932007	FALSE	None
ARL6IP6	4	0.244204	0.084544	4	0.169867	0.351346	-0.190787	0.487991	0.902883	FALSE	None
ARL8A	4	0.0571799	0.00295012	4	-0.283992	0.200412	-0.330669	0.182813	0.7688	FALSE	None
ARL8B	4	0.0674081	0.482322	4	0.0409482	0.205184	-0.0779212	0.792393	0.971567	FALSE	None
ARL9	4	-0.704884	0.419033	4	-0.318418	0.387717	0.545591	0.0324991	0.488629	FALSE	None
ARMC1	4	-0.400551	0.362912	4	-0.0810536	0.164075	0.382273	0.137158	0.715272	FALSE	None
ARMC10	4	-0.108794	0.0164572	4	-0.698129	0.618718	-0.448245	0.0880061	0.651335	FALSE	None
ARMC12	4	-0.2691	0.114984	4	-0.602731	0.205124	-0.177881	0.447352	0.889897	FALSE	None
ARMC2	4	0.0852797	0.117637	4	0.143288	1.3081	-0.0132475	0.961317	0.99652	FALSE	None
ARMC3	4	0.0986491	0.0948025	4	-0.255926	0.345332	-0.353999	0.176745	0.763823	FALSE	None
ARMC4	4	-0.344961	0.20304	4	-0.151248	0.512486	0.259433	0.303938	0.833744	FALSE	None
ARMC5	4	-0.434413	0.451503	4	-1.29709	0.632879	-0.60133	0.0176177	0.389229	TRUE	Negative
ARMC6	4	-0.0881756	0.884078	4	0.0601434	0.182915	0.130059	0.646185	0.940081	FALSE	None
ARMC7	4	-2.427	0.801827	4	-3.0901	1.6887	-0.476954	0.0928414	0.659166	FALSE	None
ARMC8	4	-0.470326	0.241007	4	-0.362857	0.0868521	0.247603	0.349517	0.855256	FALSE	None
ARMC9	4	0.185678	0.133942	4	-0.363969	0.391683	-0.538394	0.0334697	0.490211	FALSE	None
ARMCX1	4	0.211051	0.153315	4	0.103999	0.0367859	-0.205768	0.397894	0.871397	FALSE	None
ARMCX2	4	-0.0860885	0.221146	4	-0.420087	0.277614	-0.256306	0.336227	0.849955	FALSE	None
ARMCX3	4	0.449067	0.0731039	4	0.679237	0.700353	-0.0313954	0.900392	0.990448	FALSE	None
ARMCX4	4	0.0405223	0.349182	4	0.207682	0.825611	0.0903904	0.719997	0.95484	FALSE	None
ARMCX5	4	-0.207536	0.484239	4	0.0550676	1.44145	0.239928	0.343361	0.852583	FALSE	None
ARMCX6	4	-0.473812	0.795465	4	-0.268579	0.714025	0.285162	0.265601	0.81921	FALSE	None
ARMS2	4	-0.36411	0.652662	4	-0.640359	1.06565	-0.179432	0.463795	0.895435	FALSE	None
ARNT	4	0.0306514	0.125286	4	0.198129	0.123852	0.0906548	0.710554	0.953769	FALSE	None
ARNT2	4	-0.402845	0.658768	4	-0.74162	0.609285	-0.169756	0.492071	0.904191	FALSE	None
ARNTL	4	-0.0985455	0.138299	4	-0.195563	0.549229	-0.0633454	0.788134	0.971406	FALSE	None
ARNTL2	4	-0.207995	0.053026	4	-0.673445	0.0877111	-0.309379	0.191485	0.771773	FALSE	None
ARPC1A	4	-0.0120049	0.296215	4	-0.21791	0.523742	-0.185197	0.461417	0.894713	FALSE	None
ARPC1B	4	0.120524	0.0942364	4	0.25769	0.439237	0.0271474	0.922508	0.993314	FALSE	None
ARPC2	4	-1.45792	0.928053	4	-1.18367	1.12162	0.554268	0.0340102	0.492552	FALSE	None
ARPC3	4	-1.6173	1.10515	4	-1.67062	0.637815	0.265612	0.297425	0.83052	FALSE	None
ARPC4	4	-3.66412	0.0846302	4	-3.32237	0.142388	0.430515	0.0787796	0.638202	FALSE	None
ARPC5	4	0.12433	0.232516	4	0.458164	0.241647	0.186537	0.496746	0.904968	FALSE	None
ARPC5L	4	-0.110845	0.104096	4	-0.139115	0.11536	-0.00995078	0.966763	0.996991	FALSE	None
ARPP19	4	-0.123967	0.360222	4	0.232151	0.663913	0.306388	0.196991	0.774557	FALSE	None
ARPP21	4	-0.619248	0.34427	4	-0.344928	0.137281	0.449867	0.103123	0.673326	FALSE	None
ARR3	4	-0.174241	1.062	4	0.422686	1.08552	0.488337	0.0644489	0.604057	FALSE	None
ARRB1	3	-0.358405	0.532545	3	-0.753777	1.46982	-0.276922	0.328042	0.847914	FALSE	None
ARRB2	4	0.0478738	0.201138	4	-0.513845	0.483229	-0.489455	0.0711066	0.623373	FALSE	None
ARRDC1	4	-0.22198	1.89384	4	0.366122	0.172149	0.516642	0.159272	0.745787	FALSE	None
ARRDC2	4	0.356434	0.240875	4	0.734132	0.413	0.121402	0.63064	0.935315	FALSE	None
ARRDC3	4	-0.129904	0.222497	4	-0.0763446	0.113824	0.0634222	0.800487	0.973506	FALSE	None
ARRDC4	4	-0.197617	0.326956	4	-0.802674	0.153286	-0.437489	0.121978	0.700005	FALSE	None
ARRDC5	3	0.0200419	0.0334675	3	0.184806	0.490141	0.0897154	0.766482	0.96762	FALSE	None
ARSA	4	-0.330202	0.212557	4	-0.649178	1.19621	-0.173136	0.484367	0.901689	FALSE	None
ARSB	4	-0.389054	0.530124	4	-0.215602	0.352057	0.27145	0.280331	0.823698	FALSE	None
ARSD	4	0.657519	0.0503323	4	0.760944	0.49639	-0.21793	0.380539	0.864832	FALSE	None
ARSE	4	-0.166953	0.043669	4	-0.0372323	0.468429	0.143062	0.559562	0.921253	FALSE	None
ARSF	4	-0.00453175	0.234203	4	0.53107	0.858207	0.397651	0.113426	0.692212	FALSE	None
ARSG	4	0.340846	0.177186	4	0.663317	0.116002	0.0905513	0.712532	0.953769	FALSE	None
ARSH	4	0.0893849	0.175892	4	0.0336029	1.69401	-0.107921	0.697184	0.952722	FALSE	None
ARSI	4	-0.0956082	0.333304	4	-0.607588	0.0923157	-0.403394	0.128967	0.70766	FALSE	None
ARSJ	3	0.365399	0.0200328	3	-0.0278092	0.0290228	-0.495063	0.0906864	0.657373	FALSE	None
ARSK	4	0.387967	0.11758	4	-0.00185159	0.159171	-0.496117	0.0435724	0.533314	FALSE	None
ART1	4	-0.182135	0.199906	4	-0.634839	0.157209	-0.307939	0.213438	0.785369	FALSE	None
ART3	4	0.0235421	0.219579	4	-0.223784	0.71396	-0.240313	0.33621	0.849955	FALSE	None
ART4	4	-0.0816488	0.0473629	4	0.237512	0.0587573	0.252115	0.287927	0.825196	FALSE	None
ART5	4	0.193637	0.225407	4	0.146832	0.221271	-0.144992	0.541533	0.916298	FALSE	None
ARTN	4	-0.114611	0.148119	4	-0.272042	0.436404	-0.0987998	0.671527	0.948509	FALSE	None
ARV1	4	-0.147833	0.171592	4	-0.318582	0.85821	-0.102093	0.714769	0.953769	FALSE	None
ARVCF	4	-0.461436	0.621847	4	-0.812965	2.5962	-0.249789	0.371812	0.864005	FALSE	None
ARX	4	-0.626791	0.98438	4	-0.532822	1.8036	0.163735	0.527144	0.911116	FALSE	None
AS3MT	4	0.026414	0.00624977	4	-0.283081	0.221343	-0.29197	0.231511	0.797715	FALSE	None
ASAH1	4	-0.0693303	0.39701	4	0.212267	0.0935664	0.221369	0.397376	0.871191	FALSE	None
ASAH2	4	-0.362633	0.215746	4	0.0884979	0.251609	0.478081	0.0540332	0.572745	FALSE	None
ASAP1	4	0.416596	0.0690461	4	0.541983	1.69263	-0.0974156	0.722908	0.955108	FALSE	None
ASAP2	4	0.2899	0.0924754	4	-0.0508022	0.122996	-0.421977	0.100777	0.668784	FALSE	None
ASAP3	4	-0.373427	0.601899	4	-0.67736	0.381042	-0.134961	0.624041	0.933218	FALSE	None
ASB1	4	0.137955	0.188756	4	0.0263767	0.31353	-0.177264	0.534337	0.914714	FALSE	None
ASB10	3	-0.24296	0.225888	3	-0.386875	0.147543	-0.0436648	0.884471	0.987629	FALSE	None
ASB11	4	0.258095	0.0413469	4	0.732694	0.101296	0.249305	0.320214	0.842254	FALSE	None
ASB12	3	-0.078827	0.828246	3	0.691296	1.15141	0.616585	0.0386793	0.516301	FALSE	None
ASB13	4	-0.136699	0.0211754	4	0.0647831	1.07617	0.188168	0.492776	0.904191	FALSE	None
ASB14	4	-0.596693	0.592859	4	-0.0224367	0.847219	0.628824	0.0240961	0.439484	FALSE	None
ASB15	4	0.201994	0.29755	4	0.290256	0.7963	-0.0366224	0.890037	0.989088	FALSE	None
ASB16	4	0.14235	0.619215	4	-0.0676563	0.316756	-0.249698	0.350424	0.855342	FALSE	None
ASB17	4	0.307409	0.29743	4	0.60006	1.11029	0.0696597	0.769085	0.967823	FALSE	None
ASB18	4	0.0681986	0.206754	4	-0.789475	0.82763	-0.761102	0.00616338	0.271994	TRUE	Negative
ASB2	3	-0.596939	0.0315945	3	-1.24383	0.212295	-0.316203	0.270307	0.819399	FALSE	None
ASB4	4	-0.24075	0.259021	4	-0.0595294	1.54767	0.179876	0.479153	0.900467	FALSE	None
ASB5	4	0.282905	0.403052	4	0.595655	0.177866	0.104212	0.715168	0.953769	FALSE	None
ASB6	4	0.153466	0.0306854	4	-0.127227	0.168839	-0.320695	0.19961	0.77809	FALSE	None
ASB7	4	0.261155	0.038149	4	0.0963821	0.452584	-0.26616	0.277572	0.823698	FALSE	None
ASB8	4	0.15882	0.264992	4	0.537003	0.225476	0.205838	0.38978	0.868373	FALSE	None
ASB9	4	-0.486268	0.991393	4	-0.830164	0.632813	-0.179996	0.489075	0.903651	FALSE	None
ASCC1	4	0.0604817	0.0989219	4	0.322811	0.654958	0.156337	0.577578	0.924589	FALSE	None
ASCC2	4	0.396182	0.267182	4	-0.177898	0.346605	-0.643463	0.0173579	0.388664	TRUE	Negative
ASCC3	4	-2.37608	0.76492	4	-2.69179	0.890161	-0.0635728	0.810608	0.975921	FALSE	None
ASCL1	4	0.367911	0.0520235	4	0.090444	0.194015	-0.40102	0.107376	0.683814	FALSE	None
ASCL2	4	0.274808	0.279434	4	0.166802	0.549236	-0.220548	0.375331	0.864032	FALSE	None
ASCL3	4	-0.132594	0.426451	4	-0.100889	0.692988	0.0533159	0.821376	0.975983	FALSE	None
ASCL4	4	0.333267	0.499809	4	0.834905	1.58036	0.231475	0.379593	0.864518	FALSE	None
ASCL5	4	-0.212455	0.146293	4	0.0376834	0.233523	0.258782	0.277066	0.823698	FALSE	None
ASF1A	4	-0.855947	0.12714	4	-0.912127	0.823082	0.212205	0.401866	0.873652	FALSE	None
ASF1B	4	-0.626415	1.17633	4	-0.416842	1.95973	0.261452	0.302685	0.83356	FALSE	None
ASGR1	4	0.0676918	0.0391729	4	-0.116436	0.149312	-0.208851	0.381322	0.865245	FALSE	None
ASGR2	4	0.0178911	0.115755	4	0.0182105	0.135905	-0.0420263	0.870574	0.985395	FALSE	None
ASH1L	4	0.00802204	0.00512963	4	0.155422	0.139219	0.0794242	0.743605	0.961546	FALSE	None
ASH2L	4	-1.45222	2.50713	4	-1.49532	4.14005	0.00707213	0.976839	0.998397	FALSE	None
ASIC1	3	-0.41032	0.525503	3	-0.36997	0.854323	0.177292	0.524155	0.910452	FALSE	None
ASIC2	4	-0.125622	0.114603	4	-0.216664	0.136868	-0.0537659	0.828683	0.97664	FALSE	None
ASIC3	4	0.368201	0.245437	4	0.255948	0.309638	-0.266515	0.262056	0.816306	FALSE	None
ASIC4	4	-0.128938	0.188511	4	0.342544	0.113886	0.396849	0.120775	0.700005	FALSE	None
ASIC5	4	0.382953	0.118968	4	0.506348	0.506241	-0.0919783	0.715979	0.953769	FALSE	None
ASIP	4	-0.386747	0.334408	4	-0.454179	0.678991	0.0357567	0.887085	0.988044	FALSE	None
ASL	4	0.170024	0.191948	4	-0.568934	1.65333	-0.718075	0.0116113	0.350008	TRUE	Negative
ASNA1	4	-3.26258	0.771769	4	-3.02792	1.39725	0.385021	0.135729	0.714241	FALSE	None
ASNS	4	-0.0790485	0.184316	4	-0.253715	0.162346	-0.136952	0.575448	0.923702	FALSE	None
ASNSD1	4	-0.494803	0.495651	4	-0.940605	0.417001	-0.219075	0.368714	0.862548	FALSE	None
ASPA	4	0.0307962	0.0260198	4	0.10733	0.229956	0.0135781	0.957927	0.99652	FALSE	None
ASPDH	4	-0.169188	0.900776	4	-0.414512	1.93368	-0.257905	0.292395	0.827545	FALSE	None
ASPG	4	-0.166026	0.0887857	4	-0.513308	0.155372	-0.236289	0.331516	0.84962	FALSE	None
ASPH	4	0.00189313	0.135495	4	-0.120373	0.15437	-0.132271	0.600561	0.928157	FALSE	None
ASPHD1	4	-0.236351	0.408833	4	0.146385	0.62818	0.382918	0.14917	0.732667	FALSE	None
ASPHD2	4	1.3417e-05	0.320137	4	-0.123948	0.0814097	-0.12861	0.627022	0.93426	FALSE	None
ASPM	4	-0.953875	0.228775	4	-0.422092	0.373236	0.800877	0.0183317	0.398839	TRUE	Positive
ASPN	4	0.207087	0.216335	4	-0.2063	0.185796	-0.447168	0.118233	0.697333	FALSE	None
ASPRV1	4	-0.138677	0.079517	4	-0.102103	0.36181	0.0570929	0.816197	0.975921	FALSE	None
ASPSCR1	4	-0.488641	0.0892239	4	-0.213828	0.0661038	0.386918	0.138357	0.718127	FALSE	None
ASRGL1	4	-0.345621	0.845463	4	-0.797305	0.937291	-0.33261	0.168547	0.75616	FALSE	None
ASS1	4	0.309373	0.0538977	4	-0.0703401	0.46862	-0.458574	0.103335	0.673961	FALSE	None
ASTE1	4	-0.129918	0.353963	4	0.198485	0.330073	0.28515	0.241565	0.799906	FALSE	None
ASTL	4	-0.906831	0.068056	4	-1.05068	0.413211	0.193087	0.473953	0.898899	FALSE	None
ASTN1	4	0.118556	0.115537	4	0.0926845	0.15883	-0.100588	0.682162	0.950191	FALSE	None
ASTN2	4	0.321684	0.0289588	4	-0.00836939	0.540328	-0.422163	0.100121	0.667952	FALSE	None
ASUN	4	-2.21931	1.01138	4	-2.95735	0.891774	-0.476158	0.074013	0.630366	FALSE	None
ASXL1	4	0.103568	0.179234	4	1.2365	0.150182	0.828862	0.00206156	0.153106	TRUE	Positive
ASXL2	4	-0.0844949	0.117282	4	-0.529918	0.170103	-0.350311	0.179328	0.766179	FALSE	None
ASXL3	4	0.553645	0.240974	4	0.515579	0.181987	-0.285725	0.270504	0.819399	FALSE	None
ASZ1	4	-0.384493	0.11064	4	-0.581351	0.61474	-0.0237046	0.923183	0.993492	FALSE	None
ATAD1	4	-0.440717	0.093747	4	-0.340605	0.329904	0.228748	0.345871	0.852775	FALSE	None
ATAD2	4	0.299884	0.120415	4	-0.0379362	0.682456	-0.421714	0.0893576	0.656322	FALSE	None
ATAD2B	4	0.0541593	0.171713	4	-0.0106862	0.225858	-0.102522	0.666893	0.946259	FALSE	None
ATAD3A	3	-0.704073	0.952528	3	-0.584146	1.14181	0.306845	0.298559	0.830745	FALSE	None
ATAD3B	4	-0.363051	0.743558	4	-0.769654	0.579715	-0.263537	0.362517	0.860206	FALSE	None
ATAD3C	4	0.373399	0.0666025	4	0.252286	0.0772193	-0.276813	0.246298	0.803384	FALSE	None
ATAD5	4	-0.985951	0.20332	4	-1.69753	0.0788697	-0.320748	0.205467	0.781306	FALSE	None
ATAT1	4	0.0103831	0.221701	4	0.00323487	0.189194	-0.0414522	0.873884	0.98583	FALSE	None
ATCAY	4	-0.229515	0.920922	4	0.223092	1.30665	0.391829	0.118145	0.697333	FALSE	None
ATE1	4	-0.0868883	0.155449	4	-0.291153	0.0958805	-0.161722	0.534309	0.914714	FALSE	None
ATF1	4	-0.716262	0.00294312	4	-0.94262	0.284567	0.0799712	0.749486	0.963038	FALSE	None
ATF2	4	-0.017167	0.230056	4	-0.337351	0.413342	-0.27314	0.282163	0.823698	FALSE	None
ATF3	4	-0.0338237	0.219073	4	-0.504249	0.73774	-0.405296	0.0967442	0.663958	FALSE	None
ATF4	4	-0.00768007	0.479436	4	-0.18468	0.408512	-0.162137	0.558201	0.921105	FALSE	None
ATF5	4	-0.424115	0.112639	4	-0.637088	0.152324	-0.0203389	0.933464	0.994756	FALSE	None
ATF6	4	0.121267	0.0255678	4	0.233176	0.542973	0.0121437	0.961065	0.99652	FALSE	None
ATF6B	4	0.107962	0.159747	4	0.118103	0.500525	-0.0709937	0.75938	0.965606	FALSE	None
ATF7	4	-0.151706	0.207585	4	-0.348442	0.562949	-0.11399	0.641062	0.938301	FALSE	None
ATF7IP	NA	NA	NA	NA	NA	NA	NA	NA	NA	NA	None
ATF7IP2	4	-0.13743	0.560947	4	-0.537581	1.47242	-0.290534	0.353107	0.856982	FALSE	None
ATG10	4	0.0953467	0.688114	4	0.494605	0.491817	0.251127	0.338377	0.851164	FALSE	None
ATG12	4	-0.46682	0.234171	4	-0.742183	0.479067	-0.0600403	0.823105	0.976541	FALSE	None
ATG13	4	-0.686184	0.0987263	4	-1.27524	0.105715	-0.248369	0.299283	0.830871	FALSE	None
ATG14	4	-0.441589	0.215458	4	-0.472475	0.845764	0.0962126	0.7016	0.952931	FALSE	None
ATG16L1	4	0.117725	0.169542	4	0.0163298	0.226795	-0.161933	0.489721	0.903757	FALSE	None
ATG16L2	4	-0.309632	0.453826	4	-0.358863	0.530521	0.0597531	0.800113	0.973503	FALSE	None
ATG2A	4	-0.15696	0.133451	4	0.0342658	0.398595	0.185558	0.446106	0.889544	FALSE	None
ATG2B	4	0.21729	0.081437	4	0.418279	0.0729967	0.0419168	0.856813	0.98171	FALSE	None
ATG3	4	-0.132242	1.12584	4	-0.188054	0.486397	-0.0342974	0.899053	0.989957	FALSE	None
ATG4A	4	-0.188139	0.0768504	4	0.180225	0.191173	0.336954	0.16988	0.757125	FALSE	None
ATG4B	4	0.0751091	0.0366465	4	0.382584	0.0389651	0.182916	0.435429	0.885837	FALSE	None
ATG4C	4	0.0119939	0.114733	4	-0.315663	0.13832	-0.295919	0.214745	0.786729	FALSE	None
ATG4D	4	0.380741	1.05717	4	-0.216674	3.0957	-0.726587	0.00717621	0.291323	TRUE	Negative
ATG5	4	-0.305194	0.304036	4	-1.17974	1.52131	-0.692848	0.014348	0.365251	TRUE	Negative
ATG7	4	0.105042	0.67296	4	0.0448454	0.566098	-0.123565	0.615935	0.931907	FALSE	None
ATG9A	4	-1.06165	0.113155	4	-0.991602	0.229341	0.413204	0.0984254	0.666115	FALSE	None
ATHL1	4	-1.0026	0.786755	4	-1.05382	3.16882	0.0841482	0.767781	0.967728	FALSE	None
ATIC	4	-2.08064	2.61727	4	-1.96157	2.84545	0.22024	0.369657	0.862699	FALSE	None
ATL1	4	-0.253356	0.0656456	4	-0.139137	0.471235	0.164436	0.502149	0.906168	FALSE	None
ATL2	4	-3.02685	0.904002	4	-3.48088	0.199252	-0.327214	0.229256	0.796197	FALSE	None
ATL3	4	-0.127005	0.612271	4	-0.244937	0.785184	-0.0709579	0.771944	0.967823	FALSE	None
ATM	4	-1.96018	0.237899	4	-3.00201	1.42111	-0.782389	0.0311007	0.480433	FALSE	None
ATMIN	4	0.00875667	0.0125281	4	0.148961	0.202135	0.0750114	0.756865	0.964701	FALSE	None
ATN1	4	-0.240517	0.604215	4	0.150343	0.0854549	0.38266	0.17868	0.766054	FALSE	None
ATOH1	4	0.200927	0.0591549	4	-0.388988	0.0501469	-0.586556	0.0194793	0.40405	FALSE	None
ATOH7	4	-0.489751	1.11969	4	-0.326311	0.156469	0.254041	0.404685	0.875543	FALSE	None
ATOH8	4	-0.373597	1.00395	4	0.224821	0.437739	0.602084	0.106959	0.683386	FALSE	None
ATOX1	4	0.107667	0.372676	4	-0.434889	1.53836	-0.506086	0.0446537	0.538665	FALSE	None
ATP10A	4	-0.0647541	0.47498	4	-0.144211	0.224467	-0.0597009	0.823914	0.97664	FALSE	None
ATP10B	4	0.0836449	0.344392	4	-0.294189	0.713369	-0.362614	0.140151	0.7205	FALSE	None
ATP10D	4	-0.290633	0.423217	4	-0.206346	0.178649	0.159329	0.583489	0.925513	FALSE	None
ATP11A	4	0.211017	0.232873	4	0.380451	0.102049	0.0202296	0.937569	0.995194	FALSE	None
ATP11B	4	-0.351615	0.223502	4	-0.536081	1.52447	-0.0597283	0.817382	0.975921	FALSE	None
ATP11C	4	0.219847	0.051144	4	0.260078	0.332808	-0.0873224	0.726319	0.955719	FALSE	None
ATP12A	4	-0.330618	0.168519	4	-0.268638	0.190964	0.154473	0.553533	0.920002	FALSE	None
ATP13A1	4	-2.76763	0.0605498	4	-2.78359	0.0790381	0.181743	0.465756	0.896152	FALSE	None
ATP13A2	4	0.0352158	0.108195	4	0.0746382	0.177582	-0.0168619	0.948846	0.996345	FALSE	None
ATP13A3	4	-0.528347	0.062796	4	-0.261007	0.297303	0.401746	0.128833	0.70766	FALSE	None
ATP13A4	4	0.320633	0.024751	4	0.321759	0.085386	-0.157773	0.511779	0.907486	FALSE	None
ATP13A5	4	-0.0950603	0.136339	4	-0.00942161	0.626758	0.078702	0.748845	0.963005	FALSE	None
ATP1A1	4	-1.95866	0.044471	4	-1.93876	0.0753103	0.393891	0.114637	0.692212	FALSE	None
ATP1A2	4	-0.0468957	0.12834	4	-0.0179314	0.620021	0.01734	0.941889	0.995794	FALSE	None
ATP1A3	4	0.355252	0.02024	4	0.425481	0.355518	-0.116942	0.64933	0.941079	FALSE	None
ATP1A4	4	0.0470415	0.650127	4	0.550618	1.25016	0.351586	0.222293	0.793382	FALSE	None
ATP1B1	4	-0.513739	0.798406	4	-0.598837	0.810951	0.0343021	0.88405	0.987525	FALSE	None
ATP1B2	4	-0.0660316	0.264807	4	0.172045	0.107231	0.185842	0.465111	0.895579	FALSE	None
ATP1B3	4	-0.57086	0.0879085	4	-0.129869	0.203812	0.552533	0.0315568	0.483651	FALSE	None
ATP1B4	4	0.13663	0.174045	4	0.423273	0.511856	0.143193	0.541557	0.916298	FALSE	None
ATP2A1	4	0.271835	0.142162	4	0.718589	0.115643	0.219347	0.379392	0.864518	FALSE	None
ATP2A2	4	-3.56219	1.14592	4	-3.46938	0.610506	0.197738	0.417461	0.879698	FALSE	None
ATP2A3	4	0.0585084	0.375281	4	-0.405586	0.193244	-0.420314	0.13032	0.70891	FALSE	None
ATP2B1	4	-0.333904	0.399551	4	-0.568524	0.592656	-0.0975017	0.685733	0.950191	FALSE	None
ATP2B2	4	-0.218039	0.229564	4	-0.314036	0.689478	-0.0300679	0.90031	0.990448	FALSE	None
ATP2B3	4	0.42305	0.0852164	4	0.315992	0.0578101	-0.284053	0.252231	0.810177	FALSE	None
ATP2B4	4	-0.356388	0.0828091	4	-0.411734	1.17552	0.0381864	0.883534	0.987278	FALSE	None
ATP2C1	4	0.308039	0.0320583	4	-0.392638	0.155314	-0.717107	0.00603362	0.269821	TRUE	Negative
ATP2C2	4	0.0541365	0.116944	4	0.0860054	0.193258	-0.0266341	0.909564	0.99134	FALSE	None
ATP4A	4	-0.0744166	0.483164	4	-0.247766	0.164431	-0.131301	0.609872	0.930441	FALSE	None
ATP4B	4	-0.112772	0.382619	4	-0.566268	0.796356	-0.367544	0.137313	0.715657	FALSE	None
ATP5A1	4	-3.20234	1.60738	4	-3.01423	0.895292	0.341878	0.179508	0.766179	FALSE	None
ATP5B	4	-2.89758	1.64009	4	-2.32871	3.23159	0.776919	0.00971159	0.326979	TRUE	Positive
ATP5C1	4	-1.83209	0.75398	4	-1.78331	1.15544	0.331239	0.180323	0.767493	FALSE	None
ATP5D	4	-2.12225	1.8043	4	-2.0765	1.87471	0.2697	0.274832	0.822061	FALSE	None
ATP5F1	4	-2.34847	1.67474	4	-2.92486	0.798293	-0.318588	0.19082	0.771773	FALSE	None
ATP5G1	3	-0.262327	0.607521	3	-0.279222	0.792814	0.0384131	0.890202	0.989088	FALSE	None
ATP5G2	4	0.0467228	0.241624	4	0.373876	0.0803593	0.212828	0.395512	0.870825	FALSE	None
ATP5G3	4	0.206445	0.00994762	4	-0.0217758	0.111385	-0.299635	0.210784	0.783606	FALSE	None
ATP5H	4	-1.6549	0.978358	4	-2.1779	0.968057	-0.267453	0.269814	0.819399	FALSE	None
ATP5I	4	-1.54281	3.59114	4	-1.35626	5.6812	0.204205	0.430734	0.883295	FALSE	None
ATP5J	4	-2.02149	0.288738	4	-2.1051	0.508164	0.237951	0.327332	0.847348	FALSE	None
ATP5J2	NA	NA	NA	NA	NA	NA	NA	NA	NA	NA	None
ATP5L	3	-1.44791	2.12564	3	-1.02014	2.93081	0.599619	0.131448	0.710451	FALSE	None
ATP5L2	NA	NA	NA	NA	NA	NA	NA	NA	NA	NA	None
ATP5O	4	-2.92011	0.4857	4	-3.00378	0.202797	0.0925228	0.701566	0.952931	FALSE	None
ATP5S	4	0.248412	0.152997	4	0.00583302	0.751427	-0.315793	0.200743	0.77897	FALSE	None
ATP5SL	4	-1.56305	0.546729	4	-1.26572	0.413397	0.634	0.0185181	0.399373	TRUE	Positive
ATP6AP1	4	-1.48088	0.986007	4	-1.33806	1.37334	0.395574	0.104946	0.678737	FALSE	None
ATP6AP1L	4	-0.0411312	0.330169	4	-0.351272	0.145986	-0.254874	0.303737	0.833642	FALSE	None
ATP6AP2	4	-2.29461	0.918085	4	-2.22077	3.34675	0.23456	0.435096	0.88552	FALSE	None
ATP6V0A1	4	-0.360207	0.0959247	4	-0.138802	0.599464	0.28992	0.246249	0.803384	FALSE	None
ATP6V0A2	4	-0.174118	0.117156	4	-0.350688	0.384346	-0.094045	0.702275	0.952931	FALSE	None
ATP6V0A4	4	-0.162579	0.0981006	4	0.0325638	0.243819	0.189733	0.430549	0.883224	FALSE	None
ATP6V0B	3	-2.53236	0.655705	3	-3.00269	0.303745	-0.255041	0.377141	0.864277	FALSE	None
ATP6V0C	4	-3.26401	2.19711	4	-3.37929	1.41851	0.0101978	0.965018	0.996991	FALSE	None
ATP6V0D1	4	-2.31303	1.99897	4	-2.65281	2.18028	-0.105023	0.705854	0.95345	FALSE	None
ATP6V0D2	4	-0.00864598	0.396887	4	-0.118441	0.224931	-0.1124	0.645808	0.940078	FALSE	None
ATP6V0E1	4	-0.252672	0.0991397	4	-0.197762	0.366716	0.121483	0.612365	0.931426	FALSE	None
ATP6V0E2	4	0.234182	0.0727375	4	0.232041	0.199944	-0.124554	0.599472	0.928157	FALSE	None
ATP6V1A	3	-2.99619	1.59783	3	-3.21799	0.600829	-0.0544205	0.846366	0.980987	FALSE	None
ATP6V1B1	4	0.135494	0.083626	4	-0.168519	1.29466	-0.321965	0.231136	0.797642	FALSE	None
ATP6V1B2	4	-3.04377	2.07504	4	-2.8809	5.23605	0.232447	0.440543	0.887148	FALSE	None
ATP6V1C1	4	-1.65014	1.06443	4	-1.85988	1.02059	0.074276	0.783142	0.970264	FALSE	None
ATP6V1C2	4	-0.243576	0.124421	4	-0.0652879	0.087676	0.204196	0.431671	0.883509	FALSE	None
ATP6V1D	4	-2.41889	1.3192	4	-2.46814	4.17648	0.0666523	0.82331	0.976541	FALSE	None
ATP6V1E1	4	-2.01699	1.21617	4	-1.94664	2.14613	0.324787	0.27227	0.820969	FALSE	None
ATP6V1E2	4	0.0423999	0.195697	4	-0.251593	0.816745	-0.269393	0.278548	0.823698	FALSE	None
ATP6V1F	4	-2.13197	1.76643	4	-3.03752	2.74756	-0.685101	0.0481077	0.552467	FALSE	None
ATP6V1G1	4	-1.51813	1.65234	4	-1.27909	1.97558	0.414297	0.0976985	0.666115	FALSE	None
ATP6V1G2	4	-0.285993	0.316811	4	-0.51655	0.405943	-0.0961554	0.71391	0.953769	FALSE	None
ATP6V1G3	4	0.450038	0.615234	4	0.41539	0.622667	-0.239755	0.352779	0.856516	FALSE	None
ATP6V1H	4	-2.53405	0.617961	4	-2.99024	1.08544	-0.240515	0.464708	0.895462	FALSE	None
ATP7A	4	0.167597	0.0760972	4	0.446822	0.0912896	0.12534	0.597581	0.928157	FALSE	None
ATP7B	4	-0.0656998	0.00846681	4	0.473058	0.0452949	0.423963	0.0808991	0.642023	FALSE	None
ATP8A1	4	-0.0955089	0.122308	4	-0.143547	1.09654	-0.0274366	0.916628	0.992274	FALSE	None
ATP8A2	4	0.11244	0.431552	4	0.0953828	0.0544853	-0.0910318	0.745623	0.961871	FALSE	None
ATP8B1	4	0.455473	0.0444215	4	0.623802	0.0392559	-0.0735155	0.761618	0.965978	FALSE	None
ATP8B2	4	0.113668	0.0307906	4	-0.118027	0.340252	-0.262319	0.290867	0.826647	FALSE	None
ATP8B3	4	-0.155805	0.251559	4	-0.314255	0.124549	-0.089757	0.721923	0.955021	FALSE	None
ATP8B4	4	-0.1246	0.237068	4	-0.466812	0.299725	-0.240656	0.309146	0.83651	FALSE	None
ATP9A	4	0.113504	0.122773	4	-0.0450175	0.234691	-0.202207	0.392793	0.868893	FALSE	None
ATP9B	4	-0.365157	0.252075	4	0.0210938	0.135011	0.427287	0.0897614	0.656322	FALSE	None
ATPAF1	4	-0.247639	0.217923	4	-0.723118	0.0939922	-0.302448	0.224002	0.794146	FALSE	None
ATPAF2	4	-2.03613	2.43054	4	-2.15013	2.35031	0.0470951	0.839822	0.9795	FALSE	None
ATPIF1	4	0.0143856	0.0654509	4	-0.210219	0.38472	-0.212701	0.371333	0.863566	FALSE	None
ATR	4	-2.07083	2.94816	4	-2.86134	2.88088	-0.720564	0.00937053	0.326979	TRUE	Negative
ATRAID	4	0.267442	0.112091	4	0.187305	0.189432	-0.201166	0.403403	0.874737	FALSE	None
ATRIP	4	-1.09159	0.11519	4	-1.71161	0.0474599	-0.218135	0.384787	0.867017	FALSE	None
ATRN	4	-0.0869774	0.333379	4	-0.149565	0.639753	-0.0431239	0.868128	0.985194	FALSE	None
ATRNL1	4	0.182425	0.0375804	4	0.49604	0.099632	0.147132	0.528393	0.911613	FALSE	None
ATRX	4	-0.909694	0.63743	4	-0.631922	0.757157	0.501462	0.0432062	0.532381	FALSE	None
ATXN1	4	-0.0997745	0.294728	4	-0.0524808	1.39724	0.0242548	0.923067	0.993428	FALSE	None
ATXN10	4	-1.59251	0.757452	4	-1.87376	1.01392	0.00829586	0.974495	0.998397	FALSE	None
ATXN1L	4	-0.302528	1.37104	4	-0.108018	2.2101	0.197097	0.414976	0.879028	FALSE	None
ATXN2	4	0.478085	0.118936	4	0.067074	0.729408	-0.552005	0.0536408	0.570653	FALSE	None
ATXN2L	4	-0.498925	0.652092	4	-0.739327	0.335707	-0.0450345	0.857591	0.981732	FALSE	None
ATXN3	4	0.205365	0.448726	4	0.242594	1.38644	-0.0892379	0.704776	0.953099	FALSE	None
ATXN3L	4	-0.0141966	0.264248	4	0.0681053	0.249978	0.0465093	0.844895	0.980362	FALSE	None
ATXN7	4	-0.0823295	0.0338506	4	0.282476	0.0802362	0.288156	0.232676	0.798751	FALSE	None
ATXN7L1	4	0.0660706	0.10861	4	0.194977	0.245638	0.0460449	0.857389	0.98171	FALSE	None
ATXN7L2	4	-0.64929	0.393495	4	-0.633688	1.05367	0.171783	0.468392	0.89705	FALSE	None
ATXN7L3	4	-1.3709	0.752924	4	-1.6572	1.76418	-0.0146889	0.961549	0.99652	FALSE	None
ATXN7L3B	3	-0.769201	0.692626	3	-1.13074	1.36563	-0.142208	0.616898	0.932007	FALSE	None
AUH	4	0.18967	0.408462	4	0.0111487	0.582072	-0.244307	0.306682	0.835254	FALSE	None
AUNIP	4	-0.228344	0.165954	4	-1.75133	0.854598	-1.22934	0.000317912	0.0481362	TRUE	Negative
AUP1	4	-0.649542	0.0866814	4	-1.12939	0.152449	-0.14436	0.584895	0.925769	FALSE	None
AURKA	4	-1.4032	1.06198	4	-1.20342	0.866598	0.484043	0.109315	0.688252	FALSE	None
AURKAIP1	4	-3.03072	1.16614	4	-3.06698	0.825324	0.134354	0.576249	0.923977	FALSE	None
AURKB	4	-3.00507	2.42389	4	-2.79514	1.5913	0.350434	0.182704	0.7688	FALSE	None
AURKC	4	-0.612037	1.13925	4	-0.295082	0.891299	0.393742	0.142601	0.724788	FALSE	None
AUTS2	4	-0.0721791	0.0831848	4	-0.210666	0.275569	-0.114115	0.656512	0.943075	FALSE	None
AVEN	4	-0.231091	0.322653	4	-0.412767	0.687059	-0.093266	0.704652	0.953099	FALSE	None
AVIL	4	-0.474298	0.718557	4	-0.624252	0.262932	0.00693493	0.978983	0.998397	FALSE	None
AVL9	4	-0.149283	0.282094	4	-0.12871	0.802228	0.0444047	0.866206	0.984466	FALSE	None
AVP	4	-0.718249	0.206892	4	-0.714657	0.23655	0.264945	0.326823	0.847106	FALSE	None
AVPI1	4	-0.181882	0.391597	4	-0.610202	0.768821	-0.32736	0.225357	0.794248	FALSE	None
AVPR1A	4	-0.0753217	0.397442	4	-0.672071	0.369075	-0.472278	0.0886106	0.653932	FALSE	None
AVPR1B	4	-0.280953	0.0898336	4	-0.524729	0.441945	-0.106735	0.709415	0.953532	FALSE	None
AVPR2	4	-0.0115425	0.919619	4	-0.349922	0.87931	-0.298684	0.233073	0.798751	FALSE	None
AWAT1	4	0.1186	0.131768	4	1.01038	0.590752	0.630941	0.0150415	0.372134	TRUE	Positive
AWAT2	4	0.0616279	0.0446602	4	0.187958	0.171004	0.0418089	0.865767	0.984356	FALSE	None
AXDND1	4	0.0253619	0.131847	4	0.0782411	0.383434	0.00228533	0.992126	0.999646	FALSE	None
AXIN1	4	-0.0282759	0.0412861	4	0.252666	0.0653976	0.200237	0.396847	0.871132	FALSE	None
AXIN2	4	0.299645	0.262431	4	-0.033891	0.480866	-0.415717	0.132341	0.711144	FALSE	None
AXL	4	-0.350183	0.52862	4	-0.142749	0.226786	0.27984	0.307071	0.835278	FALSE	None
AZGP1	4	-0.394208	0.109863	4	-0.430603	0.126952	0.108843	0.640528	0.938145	FALSE	None
AZI1	4	-0.492046	0.0899727	4	-0.208954	0.0741627	0.397802	0.111442	0.689697	FALSE	None
AZI2	4	-0.269599	0.062602	4	-0.187578	0.38693	0.148693	0.542916	0.916708	FALSE	None
AZIN1	4	-1.1923	0.080575	4	-1.25714	0.682298	0.303277	0.287684	0.825096	FALSE	None
AZU1	4	-0.36811	0.0798506	4	0.104504	0.134736	0.494337	0.0449964	0.540203	FALSE	None
B2M	4	-0.276847	0.211411	4	-0.310621	0.219679	0.0549509	0.84487	0.980362	FALSE	None
B3GALNT1	4	-0.277329	0.215583	4	-0.448882	0.452982	-0.04665	0.848461	0.981183	FALSE	None
B3GALNT2	4	-0.477389	0.395207	4	0.0301975	0.533291	0.555872	0.0406499	0.523826	FALSE	None
B3GALT1	4	0.0492249	0.111877	4	0.112712	0.269657	0.00162552	0.994465	0.999797	FALSE	None
B3GALT2	4	-0.17059	0.202928	4	-0.0577086	0.0841179	0.128452	0.594451	0.928157	FALSE	None
B3GALT4	4	-0.797016	0.0850209	4	-0.986937	0.557984	0.0949276	0.698191	0.952931	FALSE	None
B3GALT5	4	-0.532822	0.158857	4	-0.820978	0.192737	-0.0311651	0.907881	0.991213	FALSE	None
B3GALT6	NA	NA	NA	NA	NA	NA	NA	NA	NA	NA	None
B3GALTL	4	-0.11929	0.152895	4	-0.153117	0.14362	-0.0111967	0.964881	0.996991	FALSE	None
B3GAT1	4	0.0448491	0.210906	4	0.0369363	0.465547	-0.0576139	0.816274	0.975921	FALSE	None
B3GAT2	4	-0.953045	1.18561	4	-1.23761	1.6105	-0.0913877	0.700943	0.952931	FALSE	None
B3GAT3	4	-0.577515	0.990975	4	-0.378913	1.15762	0.292099	0.237364	0.799906	FALSE	None
B3GNT1	4	-0.265492	0.0546493	4	-0.327726	0.263011	0.0308532	0.895625	0.989814	FALSE	None
B3GNT2	4	-0.207788	0.0434689	4	0.0593903	0.242787	0.263827	0.297294	0.830419	FALSE	None
B3GNT3	4	0.127007	0.382585	4	0.12313	1.41309	-0.0898648	0.724073	0.955278	FALSE	None
B3GNT4	3	-0.648204	0.157435	3	-0.967022	0.00562597	-0.00946884	0.974225	0.998397	FALSE	None
B3GNT5	4	-0.0612512	0.571069	4	-0.355863	0.528529	-0.243541	0.347536	0.853978	FALSE	None
B3GNT6	4	0.00708436	0.794207	4	0.324263	1.61511	0.213258	0.377264	0.864277	FALSE	None
B3GNT7	4	-0.270178	0.244401	4	-0.360894	0.0235035	0.00878448	0.972738	0.998397	FALSE	None
B3GNT8	4	-0.260796	0.0221342	4	-0.441773	0.171845	-0.067593	0.788368	0.971406	FALSE	None
B3GNT9	4	-0.186987	0.198184	4	-0.181567	0.202882	0.0516352	0.840941	0.979657	FALSE	None
B3GNTL1	4	-0.144639	0.411805	4	-0.651353	0.170636	-0.370992	0.20348	0.780428	FALSE	None
B4GALNT1	4	-0.243941	0.45713	4	0.0169294	0.641835	0.283473	0.319354	0.842082	FALSE	None
B4GALNT2	4	0.0505386	0.0327577	4	0.298367	0.409501	0.143795	0.601874	0.928694	FALSE	None
B4GALNT3	4	0.115472	0.127597	4	-0.066509	1.09697	-0.219058	0.386591	0.867864	FALSE	None
B4GALNT4	4	-0.477998	0.230798	4	-0.256382	0.544243	0.330952	0.167231	0.754065	FALSE	None
B4GALT1	4	-0.537624	0.538855	4	-0.680399	1.58896	-0.00156156	0.994857	0.999797	FALSE	None
B4GALT2	4	-0.394931	0.912276	4	-0.524008	0.847566	-0.0516679	0.835654	0.978328	FALSE	None
B4GALT3	4	-0.181768	0.157287	4	-0.125937	0.153605	0.0880715	0.722496	0.955078	FALSE	None
B4GALT4	4	0.00262898	0.425877	4	0.0822749	0.478426	0.0409784	0.869381	0.985276	FALSE	None
B4GALT5	4	-0.534551	0.43682	4	0.136812	0.397387	0.712985	0.00955879	0.326979	TRUE	Positive
B4GALT6	4	-0.20044	0.449939	4	-0.0970846	0.734483	0.147027	0.563152	0.92131	FALSE	None
B4GALT7	4	-0.591567	0.355697	4	-0.52503	0.214839	0.249864	0.316561	0.84131	FALSE	None
B9D1	4	-0.443357	0.170324	4	0.0615167	0.560213	0.558995	0.0308687	0.478533	FALSE	None
B9D2	4	-0.242356	0.211356	4	-0.370755	0.241819	-0.0300527	0.910201	0.99134	FALSE	None
BAALC	4	-0.477346	0.771849	4	-0.674608	0.65001	-0.0579051	0.812435	0.975921	FALSE	None
BAAT	4	-0.670287	0.735841	4	-0.642314	2.01452	0.196557	0.418952	0.880537	FALSE	None
BABAM1	4	-0.701525	1.09461	4	-1.60332	2.6541	-0.702946	0.010002	0.331464	TRUE	Negative
BACE1	4	-0.0802543	0.207895	4	-0.162774	0.895219	-0.0643421	0.793245	0.971567	FALSE	None
BACE2	4	0.0597218	0.0568953	4	0.0149477	0.201514	-0.0929855	0.703718	0.953058	FALSE	None
BACH1	4	-0.249813	0.0384306	4	-0.0277843	1.69468	0.243175	0.432342	0.883907	FALSE	None
BACH2	4	0.174209	0.154712	4	0.000486679	0.219464	-0.237393	0.318841	0.842082	FALSE	None
BAD	4	-0.978545	1.66003	4	-1.03109	0.879169	0.187791	0.569728	0.922957	FALSE	None
BAG1	4	0.0307387	0.0843406	4	0.464948	0.0356049	0.302828	0.228073	0.795838	FALSE	None
BAG2	4	-0.314278	0.565836	4	-0.0253182	0.983693	0.293224	0.224343	0.794248	FALSE	None
BAG3	4	-0.170997	0.00858186	4	0.104009	0.162218	0.253218	0.299717	0.830976	FALSE	None
BAG4	4	-0.413709	0.17666	4	-0.0857895	0.723555	0.406777	0.122141	0.700005	FALSE	None
BAG5	4	0.185503	0.0954889	4	0.435041	0.0777246	0.0945017	0.702369	0.952931	FALSE	None
BAG6	4	-1.14878	0.290159	4	-0.581417	1.01458	0.801333	0.00432762	0.230222	TRUE	Positive
BAHD1	4	-0.674016	0.436054	4	-0.419504	0.251829	0.413921	0.106318	0.681016	FALSE	None
BAI1	4	0.495451	0.260293	4	0.272345	0.802797	-0.412717	0.0916868	0.659166	FALSE	None
BAI2	4	0.233732	0.462873	4	0.152706	0.569514	-0.181589	0.480836	0.900555	FALSE	None
BAI3	4	-0.192785	0.772541	4	0.0771813	0.612417	0.250493	0.359389	0.859069	FALSE	None
BAIAP2	4	-0.367937	0.620045	4	-0.0249265	2.02884	0.362308	0.136081	0.71453	FALSE	None
BAIAP2L1	4	-0.0801077	0.184788	4	-0.153089	0.297294	-0.0544945	0.81745	0.975921	FALSE	None
BAIAP2L2	4	0.015182	0.281211	4	0.0180717	0.244656	-0.0303462	0.901941	0.990847	FALSE	None
BAIAP3	4	-0.281442	0.0383271	4	-0.0404565	0.124316	0.270518	0.277063	0.823698	FALSE	None
BAK1	4	-0.125205	0.278298	4	-0.197085	0.0928744	-0.0397259	0.885432	0.987847	FALSE	None
BAMBI	4	0.452512	0.126813	4	0.114036	0.107834	-0.48322	0.0701461	0.620054	FALSE	None
BANF1	4	-3.13124	0.625087	4	-3.20698	0.609709	0.0756027	0.764248	0.967067	FALSE	None
BANF2	4	-0.141345	0.299765	4	0.195655	0.486677	0.300636	0.229425	0.796197	FALSE	None
BANK1	3	0.433567	0.0112833	3	0.672948	0.324206	-0.0138483	0.960793	0.99652	FALSE	None
BANP	3	-2.27338	2.87581	3	-2.6586	2.71849	-0.231154	0.428023	0.882806	FALSE	None
BAP1	4	-2.81386	0.880769	4	-2.45327	1.07607	0.589586	0.0249131	0.445317	FALSE	None
BARD1	4	-1.5919	3.1194	4	-2.32442	3.61929	-0.64283	0.0234877	0.435167	FALSE	None
BARHL1	4	-0.241831	0.184373	4	-0.672303	1.16937	-0.328783	0.209076	0.783148	FALSE	None
BARHL2	4	-0.495276	0.247861	4	-0.292437	0.774902	0.343267	0.251096	0.808355	FALSE	None
BARX1	4	-0.353548	0.0553168	4	-0.822756	0.537449	-0.261984	0.323212	0.844117	FALSE	None
BARX2	4	0.252883	0.0681098	4	0.265466	0.254015	-0.124504	0.5927	0.927606	FALSE	None
BASP1	4	-0.139923	0.0220415	4	-0.847048	0.266819	-0.531584	0.0360079	0.505147	FALSE	None
BATF	4	-0.46078	0.330925	4	-0.510246	0.558931	0.121316	0.638088	0.937604	FALSE	None
BATF2	4	-0.114663	0.297452	4	-0.285312	0.573603	-0.110326	0.64459	0.939856	FALSE	None
BATF3	4	0.19284	0.105472	4	0.160895	0.0777967	-0.136139	0.568176	0.922388	FALSE	None
BAX	4	0.244721	0.131194	4	0.508646	0.523842	0.0785768	0.740913	0.960483	FALSE	None
BAZ1A	4	0.0318811	0.0458153	4	-0.404934	0.544332	-0.389417	0.15668	0.743	FALSE	None
BAZ1B	4	-0.626971	0.213272	4	-1.84905	0.401005	-0.864478	0.00141222	0.127857	TRUE	Negative
BAZ2A	4	-0.129095	0.0270038	4	-0.141106	0.116578	0.00582531	0.98124	0.998397	FALSE	None
BAZ2B	4	0.162407	0.143072	4	-0.0164602	0.286841	-0.237536	0.332049	0.84962	FALSE	None
BBC3	4	0.120636	0.636305	4	0.386144	0.503187	0.126202	0.613179	0.931426	FALSE	None
BBIP1	4	0.128214	0.108905	4	-0.0106701	0.121215	-0.193521	0.409419	0.876871	FALSE	None
BBOX1	4	-0.162861	0.383133	4	-0.0524309	0.12151	0.128402	0.62229	0.932805	FALSE	None
BBS1	4	-0.0437719	0.406018	4	-0.149882	0.30047	-0.093181	0.700424	0.952931	FALSE	None
BBS10	4	0.0394564	0.0873606	4	-0.585563	0.292717	-0.54017	0.0381866	0.514454	FALSE	None
BBS12	4	0.101166	0.0360264	4	-0.157096	0.093165	-0.282127	0.238584	0.799906	FALSE	None
BBS2	4	0.103009	0.453229	4	0.324584	0.482595	0.0980817	0.715503	0.953769	FALSE	None
BBS4	4	-0.328961	0.559788	4	-0.0981082	0.185442	0.289123	0.319598	0.842082	FALSE	None
BBS5	4	0.182742	0.130505	4	0.193348	0.159256	-0.098648	0.701178	0.952931	FALSE	None
BBS7	4	-0.163461	0.0280528	4	0.0726129	0.294239	0.218685	0.411574	0.877609	FALSE	None
BBS9	4	-0.183638	0.329207	4	-0.213474	0.697793	0.0320173	0.890758	0.989159	FALSE	None
BBX	4	-0.0714158	0.127806	4	-0.150753	0.0160506	-0.0693485	0.775082	0.968476	FALSE	None
BCAM	4	-0.257395	0.632776	4	-0.544124	1.74275	-0.207725	0.428331	0.882806	FALSE	None
BCAN	4	-0.449597	0.495425	4	-0.64847	0.172926	-0.0313345	0.906134	0.991182	FALSE	None
BCAP29	4	-0.265104	0.0319426	4	-0.205927	0.097934	0.119938	0.624912	0.933647	FALSE	None
BCAP31	4	-0.0638885	0.0231626	4	0.121165	0.655433	0.14416	0.605894	0.929588	FALSE	None
BCAR1	4	-0.784159	0.217037	4	-0.669578	0.929889	0.317758	0.19995	0.778682	FALSE	None
BCAR3	4	-0.242825	0.403894	4	-0.0576831	0.18028	0.219555	0.439611	0.88655	FALSE	None
BCAS1	4	0.0212396	0.157077	4	-0.101285	0.134785	-0.1397	0.581282	0.925437	FALSE	None
BCAS2	4	-1.1344	0.286906	4	-1.12677	0.323765	0.350812	0.149757	0.733703	FALSE	None
BCAS3	3	0.0687977	0.076857	3	-0.0684987	0.337495	-0.170285	0.564545	0.92131	FALSE	None
BCAS4	4	-0.0699166	0.0698576	4	-0.227446	0.167345	-0.134158	0.611463	0.931244	FALSE	None
BCAT1	4	-0.155136	0.197408	4	-0.694996	0.760077	-0.432516	0.0899561	0.656322	FALSE	None
BCAT2	4	-0.357992	0.327418	4	-0.4697	0.157891	0.0164074	0.948924	0.996345	FALSE	None
BCCIP	4	-2.82106	2.59345	4	-2.77561	3.62143	0.141734	0.574632	0.92348	FALSE	None
BCDIN3D	3	0.313721	0.0207189	3	0.578125	0.229553	0.0567002	0.838228	0.979312	FALSE	None
BCHE	4	0.108178	0.116865	4	0.207759	0.931948	0.00555254	0.98384	0.998397	FALSE	None
BCKDHA	4	-0.286804	0.128127	4	-0.735833	0.604533	-0.264274	0.330205	0.848684	FALSE	None
BCKDHB	4	-0.2854	0.12299	4	-0.448019	0.129744	-0.0427135	0.860664	0.982369	FALSE	None
BCKDK	4	-0.221961	0.203997	4	-0.285637	0.0355054	0.00809655	0.974838	0.998397	FALSE	None
BCL10	4	-0.135096	0.502021	4	-0.720241	0.399166	-0.459055	0.0744426	0.630366	FALSE	None
BCL11A	4	-0.0244338	0.230763	4	0.151861	0.364499	0.126076	0.590528	0.927402	FALSE	None
BCL11B	4	-0.535121	0.327651	4	-0.963365	1.18994	-0.22508	0.35687	0.858376	FALSE	None
BCL2	4	-1.05374	0.0445424	4	-0.885742	0.23903	0.503296	0.0458961	0.542301	FALSE	None
BCL2A1	3	-0.130659	0.0501623	3	-0.616142	0.2576	-0.360713	0.202294	0.779185	FALSE	None
BCL2L1	4	-3.47663	0.308565	4	-3.27429	0.128013	0.308898	0.204828	0.781306	FALSE	None
BCL2L10	4	-0.202674	0.409383	4	0.0268044	0.339815	0.235882	0.339178	0.851164	FALSE	None
BCL2L11	4	-0.151626	0.664618	4	-0.346024	0.378021	-0.151455	0.544779	0.917793	FALSE	None
BCL2L12	4	-0.380508	0.202144	4	-0.531695	1.39904	-0.0626686	0.810941	0.975921	FALSE	None
BCL2L13	3	-0.183402	0.0509397	3	-0.10434	0.03486	0.10074	0.719832	0.954799	FALSE	None
BCL2L14	4	-0.261267	0.680938	4	-0.437794	0.184263	-0.0657084	0.80728	0.975921	FALSE	None
BCL2L15	4	-0.242295	0.115471	4	-0.0660416	0.372481	0.205392	0.463887	0.895435	FALSE	None
BCL2L2	3	-0.456227	0.113891	3	-1.06901	0.947647	-0.380529	0.202181	0.779185	FALSE	None
BCL3	4	-0.215004	0.453108	4	-0.626956	0.445715	-0.279226	0.26755	0.819273	FALSE	None
BCL6	4	0.0445262	0.0802886	4	-0.164313	0.0433521	-0.220882	0.357267	0.858376	FALSE	None
BCL6B	4	-0.91975	0.751586	4	-1.18359	0.43727	0.0221996	0.929821	0.99417	FALSE	None
BCL7A	4	0.161599	0.138207	4	0.35781	0.318516	0.0626355	0.79996	0.973503	FALSE	None
BCL7B	4	0.00841859	0.454078	4	-0.0267465	0.274328	-0.0569673	0.821659	0.976098	FALSE	None
BCL7C	4	-0.211893	0.506811	4	0.0383516	0.66703	0.25767	0.281699	0.823698	FALSE	None
BCL9	3	-0.254985	0.703059	3	-0.820821	1.7746	-0.444195	0.21267	0.784076	FALSE	None
BCL9L	3	0.277987	0.0786783	3	0.468963	0.712892	0.0115429	0.970556	0.997843	FALSE	None
BCLAF1	4	-2.02027	1.51483	4	-2.74603	1.88331	-0.546091	0.0603368	0.591025	FALSE	None
BCMO1	3	0.281308	0.0580161	3	0.365492	0.722613	-0.0739983	0.810459	0.975921	FALSE	None
BCO2	4	-0.20513	0.419563	4	-0.445337	0.677125	-0.15597	0.51066	0.907481	FALSE	None
BCOR	4	0.32805	0.0613728	4	0.407433	0.450173	-0.099446	0.684488	0.950191	FALSE	None
BCORL1	4	0.134056	0.0568076	4	0.0897892	0.0277558	-0.124986	0.606531	0.929915	FALSE	None
BCR	4	-0.0898901	0.282981	4	-0.0860002	1.15104	0.00701404	0.980154	0.998397	FALSE	None
BCS1L	4	-3.50274	1.30206	4	-3.49165	0.693305	0.120151	0.607822	0.930021	FALSE	None
BDH1	4	-0.0240585	0.0737439	4	-0.491678	0.165057	-0.3965	0.130608	0.70891	FALSE	None
BDH2	4	-0.374294	0.206857	4	-0.425444	0.952668	0.0420247	0.861505	0.982473	FALSE	None
BDKRB1	4	0.0517181	0.0905758	4	-0.397732	0.365581	-0.410746	0.0959642	0.663553	FALSE	None
BDKRB2	4	-0.230143	1.67633	4	-0.783448	2.34203	-0.574063	0.0234494	0.434916	FALSE	None
BDNF	4	-0.00211191	0.17371	4	0.238193	0.0644402	0.16088	0.505428	0.907309	FALSE	None
BDP1	3	-0.492522	2.43811	3	-0.829705	2.21945	-0.316509	0.280306	0.823698	FALSE	None
BEAN1	4	-0.119279	0.61256	4	-0.198653	1.03221	-0.0769827	0.776751	0.969125	FALSE	None
BECN1	4	-0.621282	0.153226	4	-0.178085	0.286956	0.583668	0.0193834	0.40405	FALSE	None
BEGAIN	4	-0.000154925	0.238483	4	0.201678	0.154417	0.130452	0.603852	0.929588	FALSE	None
BEND2	4	0.176823	0.128307	4	0.674347	1.48549	0.287972	0.299261	0.830871	FALSE	None
BEND3	4	-0.919854	1.03678	4	-1.65789	1.18206	-0.469088	0.10787	0.684227	FALSE	None
BEND4	4	0.0763072	0.597593	4	0.434935	0.315571	0.229494	0.375441	0.864032	FALSE	None
BEND5	4	0.129516	0.366863	4	-0.157196	0.480794	-0.31492	0.351207	0.855799	FALSE	None
BEND6	4	-0.743612	0.134928	4	-1.17436	0.329891	-0.114509	0.627628	0.934326	FALSE	None
BEND7	4	0.191004	0.396875	4	0.77789	0.764672	0.355108	0.160839	0.74814	FALSE	None
BEST1	4	-0.477941	0.203786	4	-0.792508	0.75371	-0.128438	0.592535	0.927606	FALSE	None
BEST2	4	0.0678038	0.403986	4	-0.521168	0.348503	-0.526416	0.109669	0.688836	FALSE	None
BEST3	4	-0.0990966	0.0623804	4	-0.205782	0.51956	-0.0699238	0.773149	0.968337	FALSE	None
BEST4	4	0.0273342	0.0995768	4	0.023968	0.933128	-0.0441982	0.870523	0.985395	FALSE	None
BET1	3	-1.32212	0.276876	3	-1.37822	0.0519337	0.329884	0.253618	0.811393	FALSE	None
BET1L	4	-0.253017	0.311592	4	0.26479	0.0491029	0.48457	0.0720762	0.625791	FALSE	None
BEX1	4	0.374483	0.337041	4	0.259736	0.308917	-0.274753	0.297592	0.830593	FALSE	None
BEX2	NA	NA	NA	NA	NA	NA	NA	NA	NA	NA	None
BEX4	4	-0.255086	0.405315	4	0.33785	0.569879	0.548265	0.0360509	0.505346	FALSE	None
BEX5	4	0.162138	0.225055	4	0.619666	0.0411752	0.27139	0.278327	0.823698	FALSE	None
BFAR	4	-0.374386	0.189166	4	-0.677614	0.010841	-0.111588	0.661187	0.9451	FALSE	None
BFSP1	4	-0.0944836	0.266737	4	0.111924	0.509895	0.177652	0.473782	0.898899	FALSE	None
BFSP2	4	0.110108	0.0653537	4	0.289238	0.607672	0.0697321	0.783942	0.970723	FALSE	None
BGLAP	4	-0.376111	0.612314	4	-0.198088	0.688111	0.264241	0.278022	0.823698	FALSE	None
BGN	4	-0.0730991	0.27218	4	-0.216367	0.626294	-0.10716	0.669019	0.947373	FALSE	None
BHLHA15	4	-0.513323	0.786996	4	-0.479286	0.614982	0.17287	0.533609	0.914631	FALSE	None
BHLHA9	4	-0.22835	0.0632163	4	-0.352264	0.287423	-0.0317409	0.896592	0.989957	FALSE	None
BHLHB9	4	0.101252	0.201377	4	-0.101564	0.411636	-0.231576	0.39053	0.868373	FALSE	None
BHLHE22	4	0.461115	0.151831	4	0.197848	0.409095	-0.430302	0.0893051	0.656322	FALSE	None
BHLHE23	4	-0.0437202	0.0624792	4	0.168054	0.36625	0.154223	0.526976	0.910944	FALSE	None
BHLHE40	4	-0.00136805	0.21372	4	-0.239971	0.123797	-0.217401	0.369601	0.862699	FALSE	None
BHLHE41	4	0.0526945	0.433237	4	0.369852	0.530297	0.198093	0.47916	0.900467	FALSE	None
BHMT	4	-0.394895	0.129123	4	-0.693954	0.742576	-0.114359	0.652013	0.941457	FALSE	None
BHMT2	4	-0.505983	0.548295	4	-0.288791	0.147496	0.356931	0.24006	0.799906	FALSE	None
BICC1	4	-0.0499882	0.259352	4	-0.146305	0.0228095	-0.0888565	0.729787	0.956779	FALSE	None
BICD1	4	-0.439145	0.466465	4	-0.721042	0.801679	-0.126237	0.656973	0.943179	FALSE	None
BICD2	4	-0.97796	2.33308	4	-1.10309	2.12925	-0.0134808	0.953757	0.99652	FALSE	None
BID	4	-0.83517	0.343647	4	-0.622831	0.828969	0.428886	0.12282	0.700005	FALSE	None
BIK	4	0.473647	0.0478608	4	0.639119	0.021615	-0.0838075	0.722622	0.955078	FALSE	None
BIN1	4	-0.104669	0.154442	4	0.134146	0.537198	0.209076	0.429749	0.883224	FALSE	None
BIN2	3	-0.403764	0.608541	3	-1.11754	1.62661	-0.565098	0.0561749	0.579072	FALSE	None
BIN3	4	-0.0325262	0.12434	4	0.00780878	0.0575569	0.0100372	0.967663	0.997361	FALSE	None
BIRC2	4	-0.132907	0.244834	4	-0.608934	0.396594	-0.34743	0.201669	0.779185	FALSE	None
BIRC3	4	-0.0580884	0.124865	4	-0.0209667	0.480351	0.0267115	0.908585	0.99133	FALSE	None
BIRC5	4	-2.35361	0.024182	4	-2.33308	1.05338	0.317189	0.337202	0.851079	FALSE	None
BIRC6	4	-0.431879	0.168238	4	-0.863425	0.234178	-0.212596	0.386729	0.867867	FALSE	None
BIRC7	4	-0.0895897	0.133489	4	0.0164725	0.182087	0.0890307	0.70648	0.95345	FALSE	None
BIRC8	4	-0.107805	0.299233	4	-0.218178	0.182703	-0.0729884	0.765431	0.967324	FALSE	None
BIVM	4	0.125763	0.0447749	4	-0.0611972	0.747951	-0.224964	0.385789	0.867864	FALSE	None
BLACE	4	0.202264	0.472826	4	0.381879	0.375674	0.039088	0.875867	0.986058	FALSE	None
BLCAP	4	-0.102143	0.21407	4	0.236609	0.795168	0.276904	0.255001	0.812865	FALSE	None
BLID	4	0.308364	0.00849247	4	0.378823	0.024129	-0.0963053	0.679289	0.949732	FALSE	None
BLK	4	-0.510371	1.91874	4	-0.497149	1.83993	0.0012461	0.996099	0.999797	FALSE	None
BLM	4	-1.1839	1.2725	4	-1.48093	3.61579	-0.133172	0.667178	0.946348	FALSE	None
BLMH	4	-0.594841	0.025949	4	0.028389	0.127986	0.708716	0.0060733	0.269821	TRUE	Positive
BLNK	4	0.16271	0.0627312	4	-0.0882971	0.399688	-0.295544	0.229658	0.796197	FALSE	None
BLOC1S1	4	-0.0622185	0.0936644	4	-0.0624121	0.0598703	-0.010209	0.966532	0.996991	FALSE	None
BLOC1S2	4	-0.318777	0.136614	4	-0.390511	0.377883	0.0491301	0.85534	0.981471	FALSE	None
BLOC1S3	4	-0.0715049	0.157536	4	0.00887187	0.187472	0.0613609	0.812288	0.975921	FALSE	None
BLOC1S4	4	-0.00567384	0.141344	4	-0.432973	0.118993	-0.368409	0.13961	0.71973	FALSE	None
BLOC1S5	4	-0.14238	0.390144	4	-0.341761	0.746715	-0.150717	0.540125	0.916124	FALSE	None
BLOC1S6	4	-0.0757328	0.236887	4	-0.0392787	1.00279	0.0315953	0.8995	0.990057	FALSE	None
BLVRA	4	-0.0115233	0.104464	4	-0.308821	0.373726	-0.260305	0.314649	0.8404	FALSE	None
BLVRB	4	-0.992575	0.818014	4	-1.0961	0.917475	0.156176	0.539261	0.915736	FALSE	None
BLZF1	4	0.102904	0.149871	4	-0.0725323	0.422734	-0.213673	0.412343	0.877971	FALSE	None
BMF	4	-0.100579	0.120975	4	-0.0678024	0.970428	0.0414086	0.865193	0.983948	FALSE	None
BMI1	4	0.0679941	0.15284	4	-0.809783	0.12831	-0.752109	0.00437945	0.230222	TRUE	Negative
BMP1	4	0.168805	0.152585	4	0.329877	0.236581	0.0322962	0.889384	0.988899	FALSE	None
BMP10	4	-0.0942931	0.14542	4	-0.527029	0.106809	-0.339151	0.222377	0.793382	FALSE	None
BMP15	4	0.338792	0.356775	4	0.536277	1.26026	-0.0180455	0.954843	0.99652	FALSE	None
BMP2	4	-0.0866483	0.787619	4	-0.411288	0.716168	-0.254428	0.329012	0.8484	FALSE	None
BMP2K	4	-0.988471	3.38088	4	-1.15449	2.86672	-0.110949	0.643035	0.939	FALSE	None
BMP3	4	-0.785853	2.15073	4	-0.987877	0.913791	-0.079094	0.764496	0.967076	FALSE	None
BMP4	4	0.0352679	0.418987	4	0.162958	1.04555	0.0626489	0.843908	0.980058	FALSE	None
BMP5	4	-0.274326	0.161315	4	-0.164787	0.457004	0.175676	0.457732	0.892847	FALSE	None
BMP6	4	0.454898	0.232539	4	-0.0289716	0.80989	-0.603116	0.0231811	0.433393	FALSE	None
BMP7	4	0.0640525	0.250174	4	0.338938	0.528443	0.161714	0.491428	0.904191	FALSE	None
BMP8A	3	0.279387	0.396606	3	-0.172844	1.97025	-0.510037	0.0865626	0.650188	FALSE	None
BMP8B	NA	NA	NA	NA	NA	NA	NA	NA	NA	NA	None
BMPER	4	-0.100799	0.155225	4	0.234984	0.0989094	0.274406	0.275815	0.822641	FALSE	None
BMPR1A	4	-0.694319	1.19755	4	-0.965524	1.83976	-0.132028	0.626886	0.93426	FALSE	None
BMPR1B	3	-0.244492	0.150435	3	0.0868006	0.0736025	0.329954	0.245702	0.803384	FALSE	None
BMPR2	3	0.0611652	0.127968	3	-0.237387	1.20923	-0.287266	0.357797	0.858376	FALSE	None
BMS1	4	-2.34833	0.0980144	4	-2.53168	0.233601	0.0915695	0.712029	0.953769	FALSE	None
BMX	NA	NA	NA	NA	NA	NA	NA	NA	NA	NA	None
BNC1	4	-0.363975	0.0654246	4	-0.561137	0.187212	-0.0306992	0.903753	0.991165	FALSE	None
BNC2	4	-0.488785	0.145943	4	-0.5131	0.483736	0.159698	0.494119	0.904445	FALSE	None
BNIP1	4	-1.95455	1.71711	4	-2.06693	1.59993	0.175476	0.599231	0.928157	FALSE	None
BNIP2	4	-0.0260715	0.0272576	4	-0.256543	0.0691227	-0.21002	0.389692	0.868373	FALSE	None
BNIP3	4	-0.197089	0.550879	4	-0.718463	0.163872	-0.360963	0.181216	0.768504	FALSE	None
BNIP3L	4	-0.222436	0.1185	4	-0.276114	0.917253	0.0192119	0.948537	0.996345	FALSE	None
BNIPL	3	-0.347455	0.978795	3	-0.466119	1.85156	-0.0611293	0.839416	0.979318	FALSE	None
BOC	4	-0.319538	0.631505	4	-0.493141	1.37991	-0.086362	0.717774	0.953861	FALSE	None
BOD1	NA	NA	NA	NA	NA	NA	NA	NA	NA	NA	None
BOD1L1	4	-1.2058	4.25259	4	-1.25289	3.4183	0.0240124	0.931869	0.994635	FALSE	None
BOD1L2	4	-0.0734132	0.307298	4	-0.133303	0.891832	-0.0375734	0.871802	0.98549	FALSE	None
BOK	4	0.0488788	0.0595029	4	0.15624	0.0629721	0.0313581	0.897767	0.989957	FALSE	None
BOLA1	4	-0.735514	0.0478323	4	-1.06805	0.270741	-0.0185532	0.938259	0.995396	FALSE	None
BOLA3	3	-1.81853	0.264016	3	-1.64642	0.127135	0.552382	0.0572552	0.583312	FALSE	None
BOLL	4	0.238301	0.185229	4	0.175606	0.792188	-0.183207	0.451098	0.890514	FALSE	None
BOP1	4	-2.64432	2.53705	4	-2.28409	4.57627	0.493202	0.0805388	0.641602	FALSE	None
BORA	3	-0.314097	1.14168	3	0.162555	0.229709	0.482742	0.187446	0.770594	FALSE	None
BPGM	4	0.00128176	0.0969862	4	-0.162874	0.52005	-0.161156	0.560457	0.921253	FALSE	None
BPHL	4	0.132894	0.0111994	4	0.25104	0.599448	0.00790725	0.976362	0.998397	FALSE	None
BPI	4	0.0415381	0.103497	4	-0.0442549	0.876784	-0.108122	0.668234	0.946675	FALSE	None
BPIFA1	4	-0.556295	0.18254	4	-0.589645	0.398817	0.140075	0.555763	0.920104	FALSE	None
BPIFA2	4	0.305668	0.0560491	4	0.0441267	0.0946991	-0.365334	0.134234	0.713305	FALSE	None
BPIFA3	4	-0.478006	0.21378	4	-0.477935	0.31539	0.148728	0.524226	0.910452	FALSE	None
BPIFB1	4	-0.247702	0.246326	4	0.16616	0.204455	0.400014	0.105236	0.678737	FALSE	None
BPIFB2	4	-0.404365	0.209342	4	0.111669	0.18533	0.54796	0.030404	0.476774	FALSE	None
BPIFB3	4	-0.361616	0.291255	4	-0.4184	1.59356	0.00808738	0.975505	0.998397	FALSE	None
BPIFB4	4	-0.125146	0.539408	4	0.54675	0.870355	0.55861	0.0280096	0.463677	FALSE	None
BPIFB6	4	-1.01025	0.307252	4	-0.533215	0.602348	0.700499	0.00665932	0.285976	TRUE	Positive
BPIFC	4	0.0381622	0.00979546	4	0.117174	0.19913	0.0151446	0.949739	0.996345	FALSE	None
BPNT1	4	-0.633747	0.222712	4	-1.05938	0.199349	-0.136523	0.562875	0.92131	FALSE	None
BPTF	4	-1.5248	0.63026	4	-0.993456	0.414661	0.925204	0.0195501	0.40405	FALSE	None
BRAF	4	-0.311735	0.029233	4	-1.05621	0.735712	-0.504096	0.0917405	0.659166	FALSE	None
BRAP	4	-0.427788	0.256331	4	0.0831619	0.0899289	0.552063	0.0418612	0.527776	FALSE	None
BRAT1	4	-1.28359	1.03373	4	-1.64697	2.39565	-0.145006	0.609246	0.93021	FALSE	None
BRCA1	4	-1.98078	0.622188	4	-3.12011	0.723838	-0.89602	0.00226546	0.162628	TRUE	Negative
BRCA2	4	-1.69408	1.41311	4	-2.68976	0.671687	-0.718276	0.00880575	0.319061	TRUE	Negative
BRCC3	4	-0.460233	0.177001	4	-2.01177	1.25114	-1.21925	0.000693429	0.0822986	TRUE	Negative
BRD1	4	-0.983057	0.142456	4	-2.23032	0.710737	-0.886145	0.00248722	0.170867	TRUE	Negative
BRD2	4	-1.26538	1.96721	4	-0.625565	1.43762	0.774245	0.00684976	0.288511	TRUE	Positive
BRD3	4	-0.238507	0.354486	4	-0.405273	0.825927	-0.094344	0.689514	0.951544	FALSE	None
BRD4	4	-2.57064	0.332249	4	-2.31807	0.121585	0.524659	0.0600543	0.590502	FALSE	None
BRD7	4	0.0572106	0.289457	4	1.01995	0.510737	0.707725	0.00940519	0.326979	TRUE	Positive
BRD8	3	-2.06158	0.40341	3	-1.87784	0.273759	0.533932	0.0831247	0.645756	FALSE	None
BRD9	4	-0.309473	0.0273015	4	0.639743	0.257879	0.85037	0.00192331	0.149473	TRUE	Positive
BRDT	4	-0.263462	0.620455	4	-0.541476	0.460782	-0.157745	0.57391	0.923446	FALSE	None
BRE	4	-1.1628	0.475573	4	-2.74511	0.585488	-1.25053	0.000109209	0.0249939	TRUE	Negative
BRF1	4	-2.79082	1.31027	4	-2.92963	1.3048	0.0491275	0.835784	0.978328	FALSE	None
BRF2	4	-2.36149	1.65122	4	-2.00432	3.26934	0.598097	0.0598492	0.590226	FALSE	None
BRI3	4	-0.526744	0.171547	4	-0.663134	0.224839	0.0730472	0.7605	0.965978	FALSE	None
BRI3BP	4	-0.232041	0.338588	4	0.135282	1.59621	0.344267	0.193267	0.771818	FALSE	None
BRICD5	4	-0.435113	0.257282	4	-0.77469	0.815474	-0.138877	0.570414	0.923062	FALSE	None
BRINP1	4	0.49004	0.0403839	4	0.587773	0.296889	-0.150611	0.536708	0.915136	FALSE	None
BRINP2	4	-0.166833	0.0341236	4	-0.33351	0.418051	-0.0909969	0.706536	0.95345	FALSE	None
BRINP3	4	0.101181	0.091065	4	-0.516467	0.643769	-0.560261	0.0296772	0.473142	FALSE	None
BRIP1	4	-2.3579	0.0508165	4	-2.73197	0.0261636	-0.123175	0.595653	0.928157	FALSE	None
BRIX1	4	-2.75974	1.92646	4	-2.7871	0.997085	0.14626	0.541509	0.916298	FALSE	None
BRK1	4	-0.484205	0.6435	4	-0.866386	0.403493	-0.163566	0.534039	0.914714	FALSE	None
BRMS1	3	-1.00904	0.414983	3	-1.21787	0.352118	0.170211	0.636927	0.937281	FALSE	None
BRMS1L	4	-0.160986	0.0403599	4	-0.0517566	1.09615	0.130527	0.628252	0.93474	FALSE	None
BROX	4	-0.198794	0.276627	4	-0.708846	0.938509	-0.371666	0.176	0.762523	FALSE	None
BRPF1	4	-0.586915	0.425333	4	-1.00711	1.56069	-0.212318	0.386109	0.867864	FALSE	None
BRPF3	4	-0.0706184	0.32819	4	0.334247	0.304624	0.323631	0.185529	0.770244	FALSE	None
BRS3	4	0.0794289	0.0265577	4	0.184012	0.144532	0.0169492	0.944385	0.996084	FALSE	None
BRSK1	4	0.173708	0.0784411	4	0.437114	0.0463794	0.110884	0.652564	0.941794	FALSE	None
BRSK2	4	-0.0623384	0.0996223	4	0.231833	0.155758	0.226271	0.35375	0.857389	FALSE	None
BRWD1	4	0.475939	0.268187	4	0.451127	0.0647673	-0.240469	0.372181	0.864005	FALSE	None
BRWD3	4	0.236519	0.181905	4	0.557933	0.0658707	0.12979	0.589143	0.927283	FALSE	None
BSCL2	4	-0.461286	0.162211	4	-0.513669	0.0986353	0.113305	0.64099	0.938274	FALSE	None
BSDC1	4	-0.0261922	0.551663	4	0.44287	0.440118	0.355655	0.182351	0.7688	FALSE	None
BSG	4	-1.08674	0.181849	4	-0.881122	0.968566	0.49676	0.0662496	0.611046	FALSE	None
BSN	4	0.0190748	0.190734	4	0.195331	0.241931	0.0985228	0.682016	0.95018	FALSE	None
BSND	4	0.15076	0.50515	4	-0.177909	0.640603	-0.359185	0.145056	0.727724	FALSE	None
BSPH1	4	-0.31995	0.228096	4	-0.653894	1.0322	-0.223155	0.368655	0.862548	FALSE	None
BSPRY	4	-0.213269	0.302655	4	-0.242046	0.604827	0.0227471	0.926823	0.994016	FALSE	None
BST1	4	-0.509752	0.677826	4	-0.268348	0.151746	0.358317	0.229004	0.796197	FALSE	None
BST2	4	-0.00192411	0.133208	4	-0.0381205	0.304477	-0.0597282	0.806146	0.975484	FALSE	None
BSX	4	0.34263	0.157438	4	0.0157001	0.990787	-0.428705	0.092538	0.659166	FALSE	None
BTAF1	4	-2.58484	0.610665	4	-2.94805	0.248921	-0.148619	0.60746	0.930021	FALSE	None
BTBD1	4	-0.436641	0.625654	4	-0.689028	0.552091	-0.0989831	0.724161	0.95531	FALSE	None
BTBD10	4	0.198616	0.463384	4	-0.310747	0.0419104	-0.516095	0.0684814	0.615247	FALSE	None
BTBD11	4	-0.0957916	0.520669	4	-0.268413	0.617568	-0.120179	0.625358	0.933837	FALSE	None
BTBD16	4	-0.279457	0.34116	4	-0.776088	1.02994	-0.346637	0.159124	0.745397	FALSE	None
BTBD17	4	-0.339311	0.289849	4	-0.81867	0.561159	-0.280225	0.346322	0.853248	FALSE	None
BTBD18	4	-0.505285	0.0220712	4	-0.623075	1.19795	0.0361149	0.898093	0.989957	FALSE	None
BTBD19	4	0.31094	0.136069	4	-0.0139028	0.232641	-0.414066	0.0884392	0.65349	FALSE	None
BTBD2	4	-0.0866062	0.0520924	4	-0.00727502	0.216212	0.0638457	0.796116	0.97185	FALSE	None
BTBD3	4	-0.0292274	0.279812	4	0.307537	0.324187	0.251798	0.298357	0.830745	FALSE	None
BTBD6	4	0.113134	0.0563656	4	0.16089	0.0743168	-0.0425203	0.864037	0.983344	FALSE	None
BTBD7	4	-0.326777	0.783956	4	-0.404446	1.14654	-0.00329224	0.989285	0.998613	FALSE	None
BTBD8	4	-0.154286	0.985992	4	-0.413759	2.81232	-0.310516	0.222572	0.793382	FALSE	None
BTBD9	4	-0.108957	0.143809	4	-0.079853	0.612336	0.0385533	0.875528	0.985889	FALSE	None
BTC	4	-0.199385	0.102589	4	-0.408014	0.475618	-0.1214	0.616203	0.931907	FALSE	None
BTD	4	-0.385766	0.2857	4	-0.471191	0.38675	0.0640338	0.822088	0.976311	FALSE	None
BTF3	NA	NA	NA	NA	NA	NA	NA	NA	NA	NA	None
BTF3L4	4	0.001401	0.134939	4	0.273853	0.179697	0.187406	0.423396	0.881313	FALSE	None
BTG1	4	0.0827771	0.0135985	4	-0.0691532	0.131996	-0.190636	0.434506	0.885324	FALSE	None
BTG2	4	0.489692	0.100297	4	0.404619	0.354461	-0.299385	0.233141	0.798751	FALSE	None
BTG3	4	-0.0540853	0.0830918	4	-0.0699278	0.0591757	-0.0257997	0.912249	0.991735	FALSE	None
BTG4	4	0.119555	0.137241	4	0.110337	0.0191124	-0.089907	0.715827	0.953769	FALSE	None
BTK	4	-0.449754	0.455489	4	0.0392838	0.595422	0.538572	0.0314982	0.483174	FALSE	None
BTLA	4	-0.135621	0.270453	4	-0.550593	0.377642	-0.30845	0.274489	0.821597	FALSE	None
BTN1A1	4	-0.022125	0.0736141	4	-0.378041	0.608453	-0.306315	0.211664	0.783606	FALSE	None
BTN2A1	4	0.158288	0.308977	4	0.30782	0.37831	0.0301749	0.898313	0.989957	FALSE	None
BTN2A2	4	-0.169177	0.274783	4	0.00569485	0.719248	0.181928	0.448302	0.890411	FALSE	None
BTN3A1	4	0.138027	0.0461215	4	-0.0695861	0.220605	-0.253447	0.292228	0.827454	FALSE	None
BTN3A2	NA	NA	NA	NA	NA	NA	NA	NA	NA	NA	None
BTN3A3	4	0.239259	0.0734505	4	0.564577	0.0637359	0.136152	0.58435	0.925769	FALSE	None
BTNL3	4	-0.812013	1.00371	4	-0.919145	1.01302	0.0742889	0.75859	0.965606	FALSE	None
BTNL8	4	-0.00787649	0.152379	4	0.0561527	0.51168	0.0221045	0.924107	0.993578	FALSE	None
BTNL9	4	-0.312656	0.8782	4	0.0571638	2.12087	0.315227	0.255727	0.813142	FALSE	None
BTRC	4	0.440552	0.114553	4	0.0494606	0.259055	-0.522988	0.0449469	0.539978	FALSE	None
BUB1	4	-1.96476	1.23146	4	-1.41641	2.59786	0.840205	0.0310128	0.479497	FALSE	None
BUB1B	4	-1.77422	1.03102	4	-2.74336	1.93167	-0.715995	0.0134801	0.361952	TRUE	Negative
BUB3	4	-3.05343	0.631576	4	-2.93387	0.527693	0.294239	0.268606	0.819273	FALSE	None
BUD13	NA	NA	NA	NA	NA	NA	NA	NA	NA	NA	None
BUD31	4	-3.23089	0.499728	4	-3.31284	0.553788	0.0465498	0.855429	0.981471	FALSE	None
BVES	4	0.285243	0.131963	4	-0.0703936	0.0416825	-0.434131	0.102501	0.672165	FALSE	None
BYSL	4	-2.606	1.74828	4	-2.72366	1.06981	0.115034	0.62697	0.93426	FALSE	None
BZRAP1	3	-0.0440423	0.047594	3	-0.296551	0.450572	-0.210076	0.455602	0.89252	FALSE	None
BZW1	4	-0.37323	0.245557	4	-0.766971	0.38933	-0.190323	0.510484	0.907481	FALSE	None
BZW2	4	-0.0814984	0.262835	4	-0.43272	0.536287	-0.289043	0.239727	0.799906	FALSE	None
C10orf10	4	0.133041	0.041643	4	-0.143603	0.0334088	-0.313178	0.206026	0.781396	FALSE	None
C10orf105	4	-0.778004	1.16735	4	-0.408238	1.14117	0.463056	0.0982409	0.666115	FALSE	None
C10orf107	4	0.435098	0.104114	4	-0.180978	0.19278	-0.701622	0.0147825	0.369331	TRUE	Negative
C10orf11	4	-0.21472	0.750512	4	-0.925485	1.9025	-0.643733	0.0220577	0.42376	FALSE	None
C10orf111	4	0.184447	0.134786	4	0.346294	0.286046	0.0266646	0.913383	0.991735	FALSE	None
C10orf113	4	-0.554807	0.487851	4	-0.789688	0.634714	-0.0305122	0.904886	0.991165	FALSE	None
C10orf115	4	-0.219451	0.0415672	4	-0.0791084	0.366334	0.167787	0.534436	0.914714	FALSE	None
C10orf118	4	0.507608	0.248744	4	0.569827	0.353469	-0.18951	0.428422	0.882806	FALSE	None
C10orf12	4	-0.0840717	0.0422033	4	0.268055	0.734047	0.280836	0.266016	0.81921	FALSE	None
C10orf120	4	0.0961209	0.00216853	4	0.256504	0.273642	0.0569033	0.817753	0.975921	FALSE	None
C10orf126	4	0.015104	0.483171	4	0.0688126	0.762927	0.00410061	0.986845	0.998397	FALSE	None
C10orf128	4	-0.276255	0.514561	4	-0.969118	0.243533	-0.471906	0.0861214	0.650156	FALSE	None
C10orf129	4	0.03617	0.190724	4	0.269228	0.141638	0.139908	0.580498	0.925099	FALSE	None
C10orf131	4	-0.0660049	0.0928113	4	-0.248134	0.638709	-0.144746	0.594989	0.928157	FALSE	None
C10orf137	4	-0.11322	0.165728	4	-0.473983	0.398719	-0.268556	0.273526	0.821331	FALSE	None
C10orf2	4	-2.90542	3.31517	4	-2.96361	2.17199	0.100215	0.675758	0.948989	FALSE	None
C10orf25	3	0.199173	0.140541	3	-0.58841	0.634849	-0.729572	0.0155998	0.376366	TRUE	Negative
C10orf32	4	-0.0417857	0.675617	4	0.145091	1.60565	0.137843	0.582415	0.925437	FALSE	None
C10orf35	4	0.0281684	0.467565	4	-0.041429	1.59756	-0.0866032	0.763599	0.966685	FALSE	None
C10orf40	4	-0.164663	0.341277	4	0.0607847	1.14954	0.227419	0.350335	0.855342	FALSE	None
C10orf53	4	-0.267831	0.295674	4	-0.249131	0.328141	0.0959784	0.691171	0.952476	FALSE	None
C10orf54	4	-0.0856166	0.0906604	4	-0.0548277	0.328704	0.0280258	0.908396	0.99133	FALSE	None
C10orf55	4	-0.36593	1.44902	4	-1.14423	1.49899	-0.68548	0.0111549	0.349845	TRUE	Negative
C10orf62	4	0.139625	0.124562	4	-0.0177164	0.430389	-0.210184	0.380258	0.864721	FALSE	None
C10orf67	4	-0.0179205	0.0497685	4	0.112185	0.15529	0.0771556	0.746795	0.962392	FALSE	None
C10orf68	4	0.213823	0.0250571	4	-0.0191664	0.385296	-0.30556	0.233742	0.798751	FALSE	None
C10orf71	4	-0.214754	0.245085	4	-0.554671	0.807554	-0.228248	0.435091	0.88552	FALSE	None
C10orf76	4	-0.800823	0.171183	4	-1.07409	0.781509	0.00133791	0.995684	0.999797	FALSE	None
C10orf82	4	-0.161431	0.326429	4	-0.215565	0.388348	-0.00891203	0.970976	0.997852	FALSE	None
C10orf85	4	0.480116	0.277771	4	0.430569	0.823634	-0.27262	0.323344	0.844117	FALSE	None
C10orf88	4	0.0571528	0.0877345	4	0.057396	0.270089	-0.055861	0.815347	0.975921	FALSE	None
C10orf90	4	-0.214014	0.650501	4	-0.174023	0.816161	0.0624997	0.797449	0.972329	FALSE	None
C10orf91	4	-0.103515	0.0376116	4	-0.508767	0.53045	-0.302072	0.221722	0.792841	FALSE	None
C10orf95	4	-0.312202	0.131081	4	-0.0989922	0.0187352	0.263153	0.287853	0.825196	FALSE	None
C10orf99	4	-0.133751	0.131351	4	0.0685811	0.331857	0.18325	0.475763	0.899843	FALSE	None
C11orf1	4	0.08794	0.148882	4	0.125752	0.024682	-0.0389762	0.874746	0.98583	FALSE	None
C11orf16	4	0.325396	0.136831	4	-0.0803801	0.674562	-0.486269	0.054452	0.574412	FALSE	None
C11orf21	4	-0.188427	0.0862288	4	-0.319498	0.0129261	-0.0622839	0.800924	0.973796	FALSE	None
C11orf24	NA	NA	NA	NA	NA	NA	NA	NA	NA	NA	None
C11orf30	4	0.301785	0.293374	4	-0.923663	0.772047	-1.13072	0.000324137	0.0486584	TRUE	Negative
C11orf31	4	-0.101393	0.448545	4	-0.0941759	0.176095	0.0159247	0.956894	0.99652	FALSE	None
C11orf35	4	-0.266821	0.42615	4	-0.498496	0.083191	-0.108337	0.683672	0.950191	FALSE	None
C11orf40	4	0.259944	0.283097	4	0.226491	0.295995	-0.156562	0.515541	0.908386	FALSE	None
C11orf42	4	0.0923635	0.180795	4	-0.52874	0.860642	-0.563488	0.0333502	0.490178	FALSE	None
C11orf44	4	0.775613	0.168747	4	1.07316	0.567159	-0.110129	0.675484	0.948894	FALSE	None
C11orf45	4	0.135626	0.213745	4	0.209184	1.00145	-0.0285349	0.910103	0.99134	FALSE	None
C11orf48	4	-0.0591254	0.283894	4	-0.258743	0.528382	-0.174672	0.454564	0.891971	FALSE	None
C11orf49	4	-0.0253807	0.133325	4	0.137469	0.088013	0.105824	0.680211	0.949865	FALSE	None
C11orf52	4	-0.132995	0.152146	4	-0.390447	0.301723	-0.177976	0.472437	0.898475	FALSE	None
C11orf53	4	0.264774	0.0166331	4	0.250905	0.586899	-0.151297	0.548673	0.918506	FALSE	None
C11orf54	4	0.105225	0.0152415	4	-0.479891	0.094891	-0.545062	0.0308204	0.478533	FALSE	None
C11orf57	4	-0.884618	1.57221	4	-1.24524	1.60278	-0.140391	0.631313	0.935491	FALSE	None
C11orf58	4	-0.362477	0.370384	4	-0.026944	0.526124	0.394261	0.119602	0.699667	FALSE	None
C11orf63	4	-0.24633	0.0937676	4	-0.495603	0.301222	-0.12982	0.583	0.925437	FALSE	None
C11orf65	4	0.015748	0.0166214	4	-0.154682	0.68069	-0.170398	0.53305	0.914631	FALSE	None
C11orf68	4	0.0638812	0.110389	4	-0.156982	0.0571274	-0.236525	0.333625	0.84962	FALSE	None
C11orf70	4	-0.0457119	0.26562	4	-0.151644	0.897731	-0.0957706	0.694024	0.952522	FALSE	None
C11orf71	4	0.240727	0.13129	4	0.491645	0.255553	0.0714885	0.76181	0.965978	FALSE	None
C11orf72	3	0.545056	0.00728781	3	0.495577	0.381776	-0.288923	0.317993	0.841392	FALSE	None
C11orf73	4	-0.488857	0.216052	4	0.35331	0.636449	0.844456	0.00220063	0.159719	TRUE	Positive
C11orf74	NA	NA	NA	NA	NA	NA	NA	NA	NA	NA	None
C11orf80	4	-0.570688	0.893488	4	-0.396345	1.12276	0.26494	0.321347	0.842878	FALSE	None
C11orf82	4	-0.299614	0.130218	4	-0.686708	0.188625	-0.220728	0.369283	0.862699	FALSE	None
C11orf83	4	-0.950776	1.80017	4	-0.402122	1.91246	0.668118	0.0693111	0.617024	FALSE	None
C11orf84	4	-0.474277	0.287233	4	-0.916852	0.156809	-0.199012	0.414427	0.878576	FALSE	None
C11orf85	4	0.219706	0.521679	4	0.221453	0.330937	-0.128815	0.604857	0.929588	FALSE	None
C11orf86	4	-0.156608	0.400347	4	-0.0232331	0.361697	0.138684	0.563806	0.92131	FALSE	None
C11orf87	4	-0.901472	0.859867	4	-1.25651	2.66675	-0.184442	0.488869	0.90346	FALSE	None
C11orf88	4	-0.108893	0.0793828	4	0.374485	0.185926	0.395348	0.119203	0.698357	FALSE	None
C11orf89	4	0.0713392	0.109324	4	-0.0181486	0.552915	-0.127076	0.590902	0.927402	FALSE	None
C11orf91	4	0.0270935	0.096164	4	-0.217106	0.304671	-0.233813	0.333197	0.84962	FALSE	None
C11orf94	4	-0.178913	0.20043	4	-0.519879	0.801665	-0.226259	0.401513	0.873625	FALSE	None
C11orf96	4	-0.0135679	1.3119	4	0.0393335	1.87366	-0.0594226	0.802306	0.974126	FALSE	None
C12orf10	4	-0.474873	0.426171	4	-0.964023	0.928956	-0.289681	0.270757	0.819502	FALSE	None
C12orf23	4	-0.127298	0.252278	4	-0.198772	0.393425	-0.0409589	0.861103	0.982423	FALSE	None
C12orf29	4	0.240185	0.364367	4	-0.212747	0.239737	-0.488913	0.0824147	0.643792	FALSE	None
C12orf36	4	-0.573264	1.03239	4	-0.915214	1.6807	-0.24722	0.303334	0.833627	FALSE	None
C12orf39	4	-0.385171	0.177827	4	0.222082	0.165564	0.607864	0.0270685	0.460243	FALSE	None
C12orf4	4	0.0705685	0.72782	4	0.223232	0.308009	0.067758	0.80134	0.973796	FALSE	None
C12orf40	4	-0.297943	0.112205	4	-0.484965	0.296477	-0.0573318	0.814966	0.975921	FALSE	None
C12orf42	4	0.276927	0.0594287	4	0.290078	0.104553	-0.131801	0.593187	0.927606	FALSE	None
C12orf43	NA	NA	NA	NA	NA	NA	NA	NA	NA	NA	None
C12orf44	4	-1.36486	0.23947	4	-0.738398	1.62394	0.892833	0.00279546	0.182526	TRUE	Positive
C12orf45	4	-2.61356	1.62775	4	-2.63178	1.29936	0.21865	0.492431	0.904191	FALSE	None
C12orf49	4	0.0167666	0.106943	4	-0.219305	0.250055	-0.225383	0.351752	0.855912	FALSE	None
C12orf5	4	0.010624	0.0529427	4	-0.232209	0.162138	-0.230676	0.341212	0.851164	FALSE	None
C12orf50	4	0.143299	0.0261787	4	-0.143203	0.0673119	-0.324386	0.189655	0.771773	FALSE	None
C12orf52	4	-0.287705	0.0807967	4	-0.187473	0.112182	0.166044	0.479667	0.900467	FALSE	None
C12orf54	4	0.0296157	0.414601	4	-0.132016	0.355706	-0.170383	0.502961	0.906743	FALSE	None
C12orf55	4	0.0807762	0.483788	4	0.512543	0.593043	0.274332	0.302245	0.83356	FALSE	None
C12orf56	4	-0.646901	0.10109	4	-0.888505	0.409733	0.0104124	0.964989	0.996991	FALSE	None
C12orf57	4	-0.262889	0.570249	4	-0.302524	1.30393	0.0151587	0.954428	0.99652	FALSE	None
C12orf60	4	-0.236668	0.547088	4	-0.142973	0.32316	0.136107	0.630875	0.935315	FALSE	None
C12orf61	4	0.256349	0.043502	4	0.253333	0.382929	-0.138	0.602911	0.929137	FALSE	None
C12orf65	4	-2.1611	0.59355	4	-2.01706	0.528091	0.460452	0.0597673	0.59008	FALSE	None
C12orf66	4	-0.108141	3.3695	4	-1.13578	1.21821	-1.03262	0.0035085	0.208187	TRUE	Negative
C12orf68	4	-0.230365	0.0401037	4	-0.475794	0.644913	-0.146512	0.553257	0.920002	FALSE	None
C12orf71	4	-0.155988	0.501415	4	0.0318968	0.487207	0.19321	0.443987	0.888906	FALSE	None
C12orf73	4	-0.0952483	0.0896125	4	-0.315992	0.3411	-0.16753	0.487182	0.902242	FALSE	None
C12orf74	4	-0.0502411	0.0618982	4	0.0737024	0.266751	0.082526	0.760902	0.965978	FALSE	None
C12orf75	4	0.0806661	0.228879	4	-0.258344	0.72861	-0.328795	0.168998	0.756919	FALSE	None
C12orf76	4	-0.0874895	0.0926533	4	-0.0122121	0.954805	0.0678654	0.794002	0.971567	FALSE	None
C12orf77	3	-0.0203897	0.00815102	3	-0.453673	0.0988739	-0.371483	0.195278	0.773539	FALSE	None
C13orf35	4	0.00933987	0.193998	4	-0.0936987	1.49793	-0.127674	0.635778	0.936905	FALSE	None
C14orf1	4	-0.162147	0.888986	4	-0.346226	1.26056	-0.118058	0.707181	0.953532	FALSE	None
C14orf105	4	0.127294	0.318915	4	-0.633355	0.46599	-0.686862	0.0155003	0.376353	TRUE	Negative
C14orf119	4	-0.209404	0.121267	4	-0.868261	0.926364	-0.477486	0.0645643	0.604218	FALSE	None
C14orf132	4	0.209866	0.0965336	4	-0.243977	0.41128	-0.474365	0.0598477	0.590226	FALSE	None
C14orf142	3	-0.191295	0.745065	3	-0.664924	4.87528	-0.502093	0.155283	0.742297	FALSE	None
C14orf159	4	-0.404423	0.122364	4	-0.705555	0.961873	-0.137413	0.582034	0.925437	FALSE	None
C14orf164	4	-0.122728	0.0366174	4	-0.15771	0.449441	-0.00601113	0.980242	0.998397	FALSE	None
C14orf166	4	-1.56982	1.69069	4	-0.978135	0.821714	0.84286	0.00345473	0.20758	TRUE	Positive
C14orf166B	4	-0.203238	0.0234146	4	-0.011301	0.259849	0.204118	0.393385	0.869109	FALSE	None
C14orf177	4	0.311151	0.286103	4	0.372804	1.28267	-0.10697	0.65676	0.943122	FALSE	None
C14orf178	4	-0.221753	0.260431	4	-0.271202	0.212677	0.0277589	0.907278	0.991182	FALSE	None
C14orf180	4	0.412276	0.0638371	4	0.321855	0.45659	-0.273799	0.265245	0.818588	FALSE	None
C14orf182	4	-0.244977	0.268192	4	-0.03425	0.307873	0.239882	0.322746	0.843591	FALSE	None
C14orf183	4	-0.0955297	0.229234	4	-0.149358	0.0736412	-0.0353746	0.88938	0.988899	FALSE	None
C14orf2	NA	NA	NA	NA	NA	NA	NA	NA	NA	NA	None
C14orf23	4	-0.154178	0.458361	4	0.0438408	0.31641	0.191306	0.437516	0.886204	FALSE	None
C14orf28	4	-0.609651	0.0539279	4	-0.583567	0.312526	0.239359	0.331483	0.84962	FALSE	None
C14orf37	4	0.148656	0.260848	4	-0.0085341	0.0650426	-0.216517	0.394984	0.870825	FALSE	None
C14orf39	4	0.231138	0.0404343	4	-0.0228639	0.216221	-0.329502	0.184634	0.769574	FALSE	None
C14orf79	3	0.0366869	0.05605	3	-0.0533727	0.0104132	-0.123576	0.657762	0.943559	FALSE	None
C14orf80	4	-3.15712	0.915818	4	-3.36595	1.9437	-0.0704377	0.81176	0.975921	FALSE	None
C14orf93	4	-0.424991	0.0536506	4	-0.385547	0.0755524	0.175373	0.485492	0.901927	FALSE	None
C15orf26	4	-0.400525	0.594033	4	-0.374121	0.416058	0.156702	0.577983	0.924589	FALSE	None
C15orf27	4	-1.02654	0.209632	4	-1.0044	0.141673	0.352173	0.144024	0.726259	FALSE	None
C15orf32	3	-0.105875	0.551705	3	-0.0831048	0.684676	0.0322742	0.912665	0.991735	FALSE	None
C15orf37	4	-0.472105	0.385514	4	-0.361224	0.298192	0.24986	0.402151	0.873652	FALSE	None
C15orf38	NA	NA	NA	NA	NA	NA	NA	NA	NA	NA	None
C15orf39	4	-0.500665	2.56083	4	-0.546872	2.74079	-0.112952	0.636004	0.936909	FALSE	None
C15orf40	4	-1.04348	0.32704	4	-0.995611	1.24569	0.302874	0.247423	0.805323	FALSE	None
C15orf41	4	-2.38293	2.01538	4	-2.36641	2.55435	0.159243	0.556646	0.920841	FALSE	None
C15orf43	4	0.0841336	0.0319324	4	0.0693962	0.812156	-0.0790994	0.784039	0.970723	FALSE	None
C15orf48	4	0.382014	0.129077	4	0.423361	0.346748	-0.156483	0.518501	0.909053	FALSE	None
C15orf52	4	-0.204882	0.0837801	4	-0.61514	0.379652	-0.274264	0.26627	0.81921	FALSE	None
C15orf53	4	-0.347762	0.143351	4	-0.88553	0.911569	-0.368125	0.144859	0.727489	FALSE	None
C15orf54	4	-0.156032	0.0491649	4	-0.0371492	0.412502	0.130892	0.59041	0.927402	FALSE	None
C15orf56	4	-0.356747	0.593972	4	-0.27306	0.195243	0.187063	0.475228	0.899324	FALSE	None
C15orf57	4	-0.545055	0.602177	4	-1.19664	0.711273	-0.426886	0.0952165	0.663423	FALSE	None
C15orf59	4	-0.335125	0.0181598	4	-0.690782	0.396544	-0.180863	0.469886	0.897693	FALSE	None
C15orf60	4	0.015537	0.17077	4	0.325259	0.108807	0.206913	0.451949	0.890847	FALSE	None
C15orf61	4	0.303866	0.264477	4	0.123197	0.117597	-0.298837	0.229523	0.796197	FALSE	None
C15orf62	4	-0.18859	0.374514	4	-0.172074	0.264656	0.0622191	0.807067	0.975921	FALSE	None
C16orf11	4	-0.515393	0.225418	4	-0.940526	0.349535	-0.189096	0.441118	0.887593	FALSE	None
C16orf13	4	-0.978383	1.36478	4	-1.15047	1.91086	-0.00309292	0.989491	0.998613	FALSE	None
C16orf3	4	0.0449546	0.272232	4	-0.193871	0.767528	-0.246363	0.297655	0.830593	FALSE	None
C16orf45	4	-0.112366	0.557255	4	-0.57274	0.190728	-0.354268	0.226142	0.794786	FALSE	None
C16orf46	4	-0.0296574	0.0841918	4	-0.468649	0.350951	-0.365972	0.17442	0.761501	FALSE	None
C16orf47	4	0.0764006	0.133267	4	0.295215	0.136547	0.111637	0.661599	0.945169	FALSE	None
C16orf52	4	-0.175455	0.202042	4	-0.879434	0.64238	-0.527136	0.0593962	0.589856	FALSE	None
C16orf54	4	-0.677298	3.92186	4	-0.706524	4.19357	-0.0990745	0.700574	0.952931	FALSE	None
C16orf58	4	-0.0045831	0.0607937	4	0.174064	0.625631	0.11331	0.68952	0.951544	FALSE	None
C16orf59	4	-1.38889	0.348055	4	-1.45204	0.396738	0.294116	0.214134	0.786503	FALSE	None
C16orf62	4	-0.259849	0.200578	4	-0.417444	0.207909	-0.0535173	0.823904	0.97664	FALSE	None
C16orf70	4	0.0706901	0.628525	4	0.0952891	0.721626	-0.0412456	0.866867	0.98479	FALSE	None
C16orf71	4	-0.496507	0.635456	4	-0.822991	1.15925	-0.188475	0.470488	0.898028	FALSE	None
C16orf72	3	-0.655965	0.644427	3	-1.95659	2.21929	-1.05269	0.00304163	0.190797	TRUE	Negative
C16orf74	4	-0.197658	0.829998	4	-0.052255	0.297323	0.16266	0.561382	0.921253	FALSE	None
C16orf78	4	-0.289709	0.846603	4	-0.746586	1.88457	-0.404929	0.108045	0.685093	FALSE	None
C16orf80	4	-2.86474	2.59326	4	-2.91306	1.55252	0.113717	0.633709	0.935898	FALSE	None
C16orf86	4	-0.406892	0.198853	4	-0.32624	0.605031	0.207525	0.390739	0.868397	FALSE	None
C16orf87	4	0.274903	0.0567274	4	0.19008	0.395656	-0.21262	0.376894	0.864277	FALSE	None
C16orf89	4	-0.66266	0.122671	4	-1.46819	0.804106	-0.489428	0.0760992	0.631128	FALSE	None
C16orf90	4	-0.72147	0.0188502	4	-0.457984	0.124262	0.481776	0.0501434	0.553912	FALSE	None
C16orf91	4	-0.231374	0.150621	4	-0.00863249	0.0126749	0.236054	0.350055	0.85526	FALSE	None
C16orf92	4	0.0418131	0.18921	4	0.503704	0.079826	0.321827	0.18984	0.771773	FALSE	None
C16orf93	4	-0.375008	0.0791201	4	-0.482276	0.021189	0.0398943	0.871113	0.985395	FALSE	None
C16orf95	4	-0.0093745	0.0694428	4	0.220553	0.114394	0.151234	0.55905	0.921253	FALSE	None
C16orf96	4	-0.678625	1.59008	4	-0.891833	1.43307	-0.100916	0.712298	0.953769	FALSE	None
C16orf97	4	-0.22398	0.375308	4	-0.469389	1.05299	-0.147471	0.538623	0.915549	FALSE	None
C16orf98	NA	NA	NA	NA	NA	NA	NA	NA	NA	NA	None
C17orf100	4	-0.553061	0.160809	4	-0.293085	0.802422	0.393284	0.132008	0.711113	FALSE	None
C17orf102	4	0.229951	0.00109326	4	-0.254807	0.311126	-0.513509	0.0491224	0.552766	FALSE	None
C17orf104	4	-0.173684	0.353188	4	-0.361547	0.476129	-0.123979	0.615126	0.931791	FALSE	None
C17orf105	4	-0.449226	0.026585	4	-0.613889	0.664825	0.013319	0.958222	0.99652	FALSE	None
C17orf107	4	-0.379662	0.0523596	4	-0.232583	0.307625	0.240859	0.378029	0.864309	FALSE	None
C17orf112	4	-0.258163	0.0193106	4	-0.052167	0.0420746	0.232944	0.326412	0.846865	FALSE	None
C17orf47	4	-0.276874	0.0890851	4	0.0288614	0.0354663	0.320412	0.200319	0.778821	FALSE	None
C17orf49	NA	NA	NA	NA	NA	NA	NA	NA	NA	NA	None
C17orf50	4	-0.285106	0.0961781	4	-0.77948	0.949409	-0.338264	0.245029	0.802776	FALSE	None
C17orf51	4	0.0699132	0.0878076	4	-0.0770008	0.204024	-0.179288	0.465737	0.896152	FALSE	None
C17orf53	4	-1.08553	0.0631777	4	-1.89903	1.95896	-0.486911	0.172436	0.758324	FALSE	None
C17orf58	4	0.0480031	0.143466	4	-0.158082	0.0881532	-0.215041	0.367109	0.862548	FALSE	None
C17orf59	4	-0.550436	0.203644	4	-0.217713	0.410844	0.445839	0.0796621	0.640651	FALSE	None
C17orf62	4	0.0102368	0.0182539	4	-0.348295	0.324628	-0.320835	0.202336	0.779185	FALSE	None
C17orf64	4	0.447534	0.032327	4	0.701622	0.324374	-0.00640105	0.97989	0.998397	FALSE	None
C17orf66	4	-0.332592	0.553396	4	-0.251604	0.240903	0.167485	0.513995	0.907987	FALSE	None
C17orf67	4	0.0552875	0.670702	4	-0.592821	1.06746	-0.576149	0.0531484	0.568769	FALSE	None
C17orf70	4	-2.04521	0.226306	4	-3.27557	0.728175	-0.993155	0.00108169	0.111104	TRUE	Negative
C17orf72	4	-0.0934468	0.311992	4	-0.876288	0.368286	-0.622596	0.021655	0.42355	FALSE	None
C17orf74	4	-0.303398	0.429107	4	-0.521866	1.07412	-0.132348	0.61291	0.931426	FALSE	None
C17orf75	4	-0.791353	0.0137465	4	-1.1849	0.170814	-0.0426182	0.858842	0.981819	FALSE	None
C17orf77	4	-0.172912	0.138843	4	0.506532	0.794867	0.581275	0.0720306	0.625791	FALSE	None
C17orf78	4	0.275236	0.446377	4	0.0570423	0.0895627	-0.315656	0.262729	0.816695	FALSE	None
C17orf80	4	-0.031395	0.0880973	4	0.435459	0.144693	0.351457	0.163181	0.751876	FALSE	None
C17orf82	4	-0.806561	2.49565	4	-0.727571	3.19666	0.100565	0.665941	0.946259	FALSE	None
C17orf85	4	-0.306059	0.384796	4	-0.885566	0.547104	-0.419711	0.0851325	0.647498	FALSE	None
C17orf89	4	-2.29782	0.994603	4	-1.1276	0.117461	1.5174	2.68059e-05	0.0100896	TRUE	Positive
C17orf96	4	-0.280646	0.476024	4	-0.00639141	1.76257	0.273153	0.271636	0.820135	FALSE	None
C17orf97	4	-0.459068	0.281266	4	-0.650948	1.07273	-0.0490564	0.838704	0.979312	FALSE	None
C17orf98	3	0.112988	0.661555	3	-0.443562	1.00332	-0.529791	0.0953354	0.663423	FALSE	None
C17orf99	4	-0.0751423	0.844389	4	-0.130081	1.30158	-0.0871816	0.716487	0.953769	FALSE	None
C18orf21	4	-2.78522	2.25419	4	-2.74627	2.57939	0.174304	0.468009	0.89691	FALSE	None
C18orf25	4	0.0368326	0.0310143	4	0.0127124	0.568431	-0.0662254	0.793291	0.971567	FALSE	None
C18orf42	4	0.411937	0.26682	4	0.806861	0.373762	0.113059	0.631647	0.935637	FALSE	None
C18orf54	4	0.219428	0.147682	4	0.329668	0.0684303	-0.0311298	0.906345	0.991182	FALSE	None
C18orf63	4	0.413602	0.236689	4	0.311282	0.308609	-0.276604	0.331105	0.849546	FALSE	None
C18orf8	4	0.0890281	0.0486006	4	-0.501536	0.173094	-0.536039	0.0305715	0.47772	FALSE	None
C19orf10	4	-0.0747156	0.0966552	4	-0.00395852	0.273691	0.0544374	0.831581	0.976817	FALSE	None
C19orf12	4	-0.11858	0.070814	4	0.13021	0.438318	0.215728	0.419123	0.880537	FALSE	None
C19orf18	4	-0.226314	0.180025	4	-0.422745	0.645107	-0.0853625	0.716981	0.953769	FALSE	None
C19orf24	4	-0.316904	0.0310931	4	-0.871175	0.641072	-0.344336	0.241077	0.799906	FALSE	None
C19orf25	4	-0.797721	1.77538	4	-0.617846	0.710531	0.323947	0.308463	0.835714	FALSE	None
C19orf26	4	-0.62156	0.963636	4	-0.769817	1.3455	-0.0370692	0.880847	0.986872	FALSE	None
C19orf33	4	0.129497	0.0239364	4	0.633225	0.239516	0.321467	0.202956	0.779513	FALSE	None
C19orf35	4	0.207145	0.102927	4	-0.179241	0.284432	-0.426146	0.116973	0.69679	FALSE	None
C19orf38	4	-0.0670035	0.706819	4	-0.116992	0.609803	-0.0578381	0.822438	0.976364	FALSE	None
C19orf40	4	-2.56815	0.14971	4	-3.49875	0.383794	-0.771097	0.0101469	0.332186	TRUE	Negative
C19orf43	4	-2.02328	0.623536	4	-1.55946	0.27836	0.817873	0.00436346	0.230222	TRUE	Positive
C19orf44	4	-0.446766	0.171957	4	0.143703	0.659685	0.633142	0.0156582	0.376498	TRUE	Positive
C19orf45	4	-0.222765	0.334607	4	-0.504158	0.83903	-0.175205	0.464341	0.895435	FALSE	None
C19orf47	4	-0.108546	0.148691	4	0.13469	0.275844	0.206721	0.411423	0.877609	FALSE	None
C19orf48	4	0.0582455	0.351123	4	-0.511997	1.32167	-0.520296	0.0543312	0.574134	FALSE	None
C19orf52	4	-1.46981	0.331835	4	-1.65706	1.35631	0.124231	0.672712	0.948788	FALSE	None
C19orf53	4	-1.99867	0.527044	4	-2.14733	0.896604	0.149678	0.540567	0.916125	FALSE	None
C19orf54	4	-0.474266	0.11904	4	-0.0971962	0.146853	0.466335	0.0625355	0.597267	FALSE	None
C19orf55	4	-0.398619	0.396486	4	-0.876815	1.52304	-0.316287	0.204133	0.78057	FALSE	None
C19orf57	4	0.0953899	1.19011	4	0.129043	0.872552	-0.0688253	0.787037	0.971328	FALSE	None
C19orf59	4	-1.10613	1.43715	4	-1.35657	1.2056	-0.0374058	0.890079	0.989088	FALSE	None
C19orf60	4	-0.667607	0.94387	4	-0.475458	1.8705	0.295494	0.212347	0.783606	FALSE	None
C19orf66	4	-0.016415	0.178023	4	-0.586947	0.8223	-0.478169	0.0681282	0.614273	FALSE	None
C19orf67	4	0.279768	0.21741	4	0.0958033	0.578896	-0.294243	0.257293	0.813142	FALSE	None
C19orf68	4	-0.0279278	0.184878	4	-0.503047	0.0163484	-0.399485	0.124023	0.702009	FALSE	None
C19orf70	4	-0.753387	0.369971	4	-0.545203	0.671798	0.43256	0.177556	0.764923	FALSE	None
C19orf71	4	-0.149329	0.159807	4	-0.406396	0.143567	-0.169744	0.473344	0.898709	FALSE	None
C19orf73	4	0.181459	0.111757	4	0.206348	0.0752278	-0.0832826	0.726272	0.955719	FALSE	None
C19orf77	4	-0.501097	0.955792	4	-0.784661	1.16624	-0.150721	0.532488	0.914323	FALSE	None
C19orf80	4	-0.403759	0.227231	4	-0.815377	1.41325	-0.275809	0.289901	0.826565	FALSE	None
C19orf81	4	-0.206863	0.357998	4	-0.178419	0.301041	0.0803664	0.774477	0.968476	FALSE	None
C1D	NA	NA	NA	NA	NA	NA	NA	NA	NA	NA	None
C1GALT1	4	0.22157	0.458187	4	0.128388	1.29558	-0.200074	0.410045	0.87712	FALSE	None
C1GALT1C1	4	0.578974	0.0135413	4	0.0928787	1.24369	-0.652601	0.0334596	0.490211	FALSE	None
C1orf100	4	0.144847	0.011999	4	0.225836	0.081242	-0.0271374	0.909794	0.99134	FALSE	None
C1orf101	4	0.12175	0.294348	4	0.0489379	0.247767	-0.139157	0.629475	0.935315	FALSE	None
C1orf105	4	-0.0817766	0.0210177	4	0.571446	0.32881	0.522386	0.0399147	0.521689	FALSE	None
C1orf106	4	-0.387031	0.499061	4	-0.631294	0.292128	-0.0607963	0.810831	0.975921	FALSE	None
C1orf109	4	-2.28335	3.03473	4	-2.39828	2.583	-0.0334894	0.889108	0.988899	FALSE	None
C1orf110	4	0.203631	0.224355	4	0.0967951	0.387203	-0.203075	0.401959	0.873652	FALSE	None
C1orf111	4	-0.405705	0.261725	4	-0.358753	0.546123	0.171967	0.46282	0.89536	FALSE	None
C1orf112	4	-1.00876	0.0868506	4	-1.74838	0.617679	-0.37211	0.156024	0.742385	FALSE	None
C1orf115	4	0.167224	0.123989	4	-0.125308	0.172044	-0.333974	0.189677	0.771773	FALSE	None
C1orf116	4	0.152925	0.259546	4	0.412943	0.589114	0.123394	0.615563	0.931907	FALSE	None
C1orf122	4	-0.213155	0.17538	4	0.0134931	0.212754	0.239749	0.322475	0.843427	FALSE	None
C1orf123	3	-0.434441	0.211499	3	-0.421637	0.470107	0.141828	0.608766	0.930175	FALSE	None
C1orf131	4	-1.19979	1.96287	4	-1.19018	1.90181	0.187216	0.474555	0.899169	FALSE	None
C1orf137	4	-0.109862	0.156078	4	-0.0919142	0.484243	0.0360664	0.878336	0.986513	FALSE	None
C1orf141	4	-0.388954	0.659269	4	-0.50498	0.192501	0.0348456	0.90097	0.990582	FALSE	None
C1orf145	NA	NA	NA	NA	NA	NA	NA	NA	NA	NA	None
C1orf146	NA	NA	NA	NA	NA	NA	NA	NA	NA	NA	None
C1orf147	4	-0.165584	0.355699	4	-0.437292	0.574308	-0.187978	0.428503	0.882806	FALSE	None
C1orf158	4	0.0468153	0.340849	4	0.316165	0.409304	0.169886	0.541855	0.916298	FALSE	None
C1orf159	4	-0.0370936	0.0643256	4	-0.284946	0.342798	-0.213804	0.410361	0.877402	FALSE	None
C1orf162	4	0.0343691	0.150238	4	0.0204127	0.403963	-0.0504554	0.8361	0.978328	FALSE	None
C1orf168	4	-0.103617	0.542487	4	-0.0530292	0.233619	0.0532344	0.842863	0.97979	FALSE	None
C1orf170	4	-0.722511	0.197179	4	-0.828352	0.136956	0.158823	0.503614	0.906743	FALSE	None
C1orf172	4	-0.302039	0.562132	4	-0.316313	1.34521	0.0126773	0.957065	0.99652	FALSE	None
C1orf173	4	0.0750059	0.328882	4	-0.0751999	0.526286	-0.182094	0.516696	0.908866	FALSE	None
C1orf174	4	-0.311975	2.48153	4	0.0372274	1.22515	0.264453	0.37517	0.864032	FALSE	None
C1orf177	4	-0.758837	0.553258	4	-1.05127	0.63947	-0.0393537	0.882743	0.987104	FALSE	None
C1orf180	4	-0.215065	0.534951	4	-0.827069	1.65625	-0.516422	0.0669881	0.611414	FALSE	None
C1orf185	4	0.0541818	0.332491	4	0.216822	0.852535	0.0763742	0.745465	0.961871	FALSE	None
C1orf186	4	0.393832	0.120153	4	0.333282	0.214745	-0.236995	0.370205	0.862926	FALSE	None
C1orf189	4	-0.159563	0.265329	4	-0.176781	0.19476	0.0250407	0.918735	0.992415	FALSE	None
C1orf192	4	-0.373248	0.346544	4	-0.389877	0.842069	0.0701342	0.771461	0.967823	FALSE	None
C1orf194	4	-0.406428	1.02188	4	-0.961779	0.992401	-0.42996	0.0800895	0.641201	FALSE	None
C1orf195	4	0.537065	0.127208	4	0.403735	0.307476	-0.356584	0.14802	0.731848	FALSE	None
C1orf198	4	0.00707308	0.0515151	4	-0.145674	0.812346	-0.154237	0.539066	0.915736	FALSE	None
C1orf200	4	0.376114	0.312119	4	0.078867	0.672189	-0.415749	0.110288	0.688836	FALSE	None
C1orf204	4	0.276973	0.0487967	4	0.0618459	0.134719	-0.318208	0.196129	0.773582	FALSE	None
C1orf21	4	0.123424	0.172788	4	0.00228298	0.195427	-0.179372	0.453284	0.89137	FALSE	None
C1orf210	4	0.152099	0.0488748	4	0.326375	0.373433	0.0460845	0.854959	0.981471	FALSE	None
C1orf213	4	0.109534	0.218671	4	-0.0508963	0.88841	-0.19577	0.435082	0.88552	FALSE	None
C1orf216	4	0.169916	0.373526	4	-0.340761	0.386297	-0.501697	0.0635174	0.601088	FALSE	None
C1orf220	4	0.0108642	0.168999	4	-0.406189	1.19595	-0.379155	0.157126	0.743	FALSE	None
C1orf226	4	-0.099148	0.0522291	4	0.381201	0.075924	0.39092	0.105291	0.678737	FALSE	None
C1orf227	4	0.250257	0.14325	4	-0.0231558	0.213291	-0.3492	0.152055	0.737126	FALSE	None
C1orf228	4	-0.570641	3.5042	4	-0.416774	4.63056	0.0173796	0.94055	0.995794	FALSE	None
C1orf229	4	-0.0121152	0.176971	4	-0.178168	0.150947	-0.157335	0.523583	0.910452	FALSE	None
C1orf233	4	-0.00189663	0.230587	4	-0.164288	0.337092	-0.155314	0.512879	0.907754	FALSE	None
C1orf27	4	-0.763981	0.610242	4	-1.80493	0.241137	-0.699539	0.00848574	0.314438	TRUE	Negative
C1orf35	4	0.157209	0.148508	4	-0.120483	0.113815	-0.32047	0.224335	0.794248	FALSE	None
C1orf43	4	0.577561	0.901345	4	0.578472	0.950427	-0.261095	0.311807	0.837371	FALSE	None
C1orf50	4	0.314736	0.158859	4	0.459829	0.0583952	-0.0397851	0.87426	0.98583	FALSE	None
C1orf51	4	-0.0749148	0.126741	4	0.137229	0.437913	0.172427	0.512975	0.907754	FALSE	None
C1orf52	4	-0.112171	0.193289	4	-0.474061	0.669609	-0.271917	0.298224	0.830745	FALSE	None
C1orf53	4	-0.482663	1.16731	4	-0.611509	2.36517	-0.110185	0.650598	0.941101	FALSE	None
C1orf54	4	-0.275336	0.439243	4	-0.343977	0.24589	0.0349734	0.896207	0.989957	FALSE	None
C1orf56	4	-0.576123	0.401655	4	-0.82613	0.788052	-0.0479131	0.83889	0.979312	FALSE	None
C1orf61	4	-0.339006	0.461521	4	-0.56202	0.290676	-0.0620766	0.813349	0.975921	FALSE	None
C1orf63	4	0.426258	0.211614	4	0.269137	0.286764	-0.325251	0.193629	0.771818	FALSE	None
C1orf64	4	-0.57782	0.3464	4	-0.658133	0.930158	0.0996526	0.669051	0.947373	FALSE	None
C1orf65	4	0.12514	0.0892788	4	-0.0578432	0.456611	-0.227585	0.338771	0.851164	FALSE	None
C1orf68	4	0.00857136	0.315518	4	0.0323711	0.48569	-0.0163082	0.957363	0.99652	FALSE	None
C1orf74	4	-1.01311	0.491562	4	-1.36432	0.568985	-0.031522	0.897103	0.989957	FALSE	None
C1orf85	4	0.00871041	0.268148	4	0.299955	0.291233	0.199441	0.464487	0.895435	FALSE	None
C1orf86	4	-0.716747	0.547955	4	-1.71841	2.6515	-0.779883	0.0135584	0.361952	TRUE	Negative
C1orf87	4	0.455841	0.0620307	4	0.686813	0.704797	-0.0350603	0.885993	0.987962	FALSE	None
C1orf94	4	-0.215722	0.0749553	4	-0.182376	0.507068	0.0873224	0.715364	0.953769	FALSE	None
C1orf95	4	-0.290108	0.0861764	4	-0.26814	0.270983	0.1082	0.651464	0.941309	FALSE	None
C1QA	3	0.40857	0.00930796	3	0.340383	0.678656	-0.248711	0.403559	0.874803	FALSE	None
C1QB	4	-0.567507	3.06415	4	-0.562954	3.18497	-0.0708634	0.781293	0.970023	FALSE	None
C1QBP	4	-2.07889	0.643911	4	-2.35024	2.5719	-0.0220991	0.942763	0.996072	FALSE	None
C1QC	4	0.17246	0.0673851	4	0.240046	0.0169998	-0.0485929	0.839012	0.979312	FALSE	None
C1QL1	4	-0.0704017	0.254703	4	-0.372063	1.05979	-0.233825	0.347876	0.854162	FALSE	None
C1QL2	4	-0.261756	0.408191	4	-0.108268	0.626266	0.209418	0.452059	0.890847	FALSE	None
C1QL3	4	0.230948	0.103511	4	0.181081	0.528289	-0.162952	0.502083	0.906168	FALSE	None
C1QL4	3	0.0929652	0.00464105	3	-1.02829	0.0682805	-0.953141	0.00254728	0.170867	TRUE	Negative
C1QTNF1	4	-0.59956	1.46466	4	-0.931122	2.50635	-0.267097	0.298024	0.830745	FALSE	None
C1QTNF2	4	0.247293	0.0567938	4	0.990012	0.100539	0.466102	0.0589074	0.588084	FALSE	None
C1QTNF3	4	0.16224	0.272208	4	0.55393	0.0955692	0.214673	0.392302	0.868893	FALSE	None
C1QTNF4	4	-0.217665	0.419371	4	-0.309857	0.445572	-0.0124158	0.959363	0.99652	FALSE	None
C1QTNF5	4	-0.310433	1.53331	4	-0.32676	1.35951	0.0231192	0.930621	0.994328	FALSE	None
C1QTNF6	4	-0.10627	0.148154	4	-0.467613	0.0805147	-0.272621	0.264594	0.818588	FALSE	None
C1QTNF7	4	-0.282857	0.353154	4	0.349257	0.718487	0.597452	0.0175257	0.388664	TRUE	Positive
C1QTNF8	4	-0.879402	1.04559	4	-0.989739	0.923859	0.125662	0.651011	0.941271	FALSE	None
C1RL	4	-0.267324	0.0801882	4	-0.465124	0.0647374	-0.0773618	0.749856	0.96327	FALSE	None
C1S	4	-0.321346	0.295245	4	-0.181118	0.203823	0.221509	0.363824	0.860587	FALSE	None
C2	4	-0.481601	1.26686	4	-1.53761	2.66742	-0.906319	0.00185709	0.147592	TRUE	Negative
C20orf112	4	-0.174027	0.639123	4	-0.333251	0.797638	-0.0954054	0.700872	0.952931	FALSE	None
C20orf141	4	-0.00452983	0.399613	4	0.245966	0.198288	0.17094	0.510247	0.907481	FALSE	None
C20orf144	NA	NA	NA	NA	NA	NA	NA	NA	NA	NA	None
C20orf166	4	-0.0657986	0.184881	4	-0.268839	0.670707	-0.162188	0.520436	0.90932	FALSE	None
C20orf173	4	-0.382889	0.0258397	4	-0.553078	0.117423	-0.00457245	0.984825	0.998397	FALSE	None
C20orf187	NA	NA	NA	NA	NA	NA	NA	NA	NA	NA	None
C20orf194	4	-0.175015	0.492351	4	-0.688776	0.582372	-0.394617	0.134253	0.713305	FALSE	None
C20orf195	4	0.17564	0.202189	4	0.337839	0.376105	0.0329371	0.895411	0.989814	FALSE	None
C20orf196	4	-0.877742	0.142153	4	-0.972721	0.391754	0.200444	0.407798	0.876548	FALSE	None
C20orf197	4	-0.112844	0.261047	4	-0.74302	1.01151	-0.480678	0.101183	0.670036	FALSE	None
C20orf201	4	-0.134929	0.289143	4	-0.28847	0.0683809	-0.0935904	0.707588	0.953532	FALSE	None
C20orf202	4	0.0521146	0.463777	4	0.160525	0.200502	0.0315347	0.909685	0.99134	FALSE	None
C20orf24	4	-0.498557	0.573679	4	-0.327584	1.06378	0.244811	0.303662	0.833627	FALSE	None
C20orf26	4	-0.254799	0.555567	4	-0.838859	1.51299	-0.453166	0.0959762	0.663553	FALSE	None
C20orf27	4	-0.377819	0.320992	4	-0.462431	0.70617	0.0162333	0.944786	0.996084	FALSE	None
C20orf62	4	-0.306997	0.540965	4	-0.609445	0.155696	-0.148474	0.596359	0.928157	FALSE	None
C20orf78	4	0.380701	0.218242	4	0.415186	0.773896	-0.160199	0.512571	0.907754	FALSE	None
C20orf85	4	-0.216146	0.308688	4	0.212531	0.30709	0.402501	0.112429	0.690404	FALSE	None
C20orf96	4	-0.830994	0.977896	4	-0.855687	1.8162	0.152794	0.536518	0.915136	FALSE	None
C21orf119	4	-0.0555598	0.263631	4	0.00612978	0.335259	0.0478418	0.842902	0.97979	FALSE	None
C21orf128	3	0.0209958	0.521799	3	-0.307091	0.833264	-0.305483	0.293723	0.828585	FALSE	None
C21orf2	4	-1.66513	2.64469	4	-1.54454	2.41294	0.267992	0.275354	0.822641	FALSE	None
C21orf33	4	-0.0975348	0.24298	4	0.0323439	0.634712	0.111917	0.706294	0.95345	FALSE	None
C21orf37	NA	NA	NA	NA	NA	NA	NA	NA	NA	NA	None
C21orf49	4	-0.386794	0.0553019	4	-0.0502717	0.336623	0.397614	0.111086	0.689242	FALSE	None
C21orf54	4	-0.898643	1.11121	4	-0.949615	1.85017	0.0777852	0.748615	0.962863	FALSE	None
C21orf58	4	0.127375	0.0468773	4	-0.0399684	0.56937	-0.214924	0.3841	0.866738	FALSE	None
C21orf59	4	-2.91129	0.916271	4	-3.01308	0.759455	0.0817107	0.727373	0.9559	FALSE	None
C21orf62	4	-0.245228	1.11054	4	0.26809	0.306561	0.469198	0.108927	0.688201	FALSE	None
C21orf67	4	0.0129474	0.0948571	4	-0.240258	0.681652	-0.231968	0.340139	0.851164	FALSE	None
C21orf88	4	-0.091604	0.0756383	4	-0.458422	0.70915	-0.283878	0.279194	0.823698	FALSE	None
C21orf90	4	0.0801467	0.236881	4	0.317544	0.0665347	0.125368	0.613269	0.931426	FALSE	None
C21orf91	4	-0.158285	0.28959	4	0.220648	1.29455	0.32609	0.181467	0.768504	FALSE	None
C22orf15	4	0.0468886	0.0172937	4	-0.30575	0.0780975	-0.337061	0.157003	0.743	FALSE	None
C22orf23	4	-0.629344	0.724733	4	-0.593199	0.5541	0.213375	0.433863	0.885034	FALSE	None
C22orf24	4	0.0247691	0.0765267	4	-0.422683	1.09015	-0.397926	0.133922	0.713305	FALSE	None
C22orf26	4	0.247248	0.186159	4	0.280443	0.275844	-0.105025	0.672778	0.948788	FALSE	None
C22orf29	4	-0.295081	0.0683759	4	-0.711646	0.959487	-0.251188	0.344448	0.852583	FALSE	None
[truncated: 16,049 more rows]

## Sheet: 0.7µM Palbociclib
Orobas Analyisis of 0.7µM Palbociclib Whole Genome CRISPR Screen
gene	n_T18_DMSO_Rich	mean_T18_DMSO_Rich	variance_T18_DMSO_Rich	n_T18_PALBOCICLIB_Rich	mean_T18_PALBOCICLIB_Rich	variance_T18_PALBOCICLIB_Rich	differential_T18_PALBOCICLIB_Rich_vs_T18_DMSO_Rich	pval_T18_PALBOCICLIB_Rich_vs_T18_DMSO_Rich	fdr_T18_PALBOCICLIB_Rich_vs_T18_DMSO_Rich	significant_T18_PALBOCICLIB_Rich_vs_T18_DMSO_Rich	effect_type_T18_PALBOCICLIB_Rich
A1BG	4	-0.727171	0.249235	4	-0.351419	0.0755022	0.336323	0.224013	0.770023	FALSE	None
A1CF	4	0.0526004	0.227783	4	-0.511319	0.293796	-0.611307	0.0283989	0.421552	FALSE	None
A2ML1	4	0.208971	0.804974	4	-0.192197	0.476375	-0.558746	0.0447832	0.510162	FALSE	None
A2M	4	-0.422239	0.14671	4	0.0125284	0.253876	0.401851	0.129765	0.681125	FALSE	None
A3GALT2	4	-0.0201883	0.0392308	4	0.379327	0.360298	0.310645	0.263187	0.796746	FALSE	None
A4GALT	4	-0.348373	0.365241	4	-0.274121	0.165207	0.0318707	0.905396	0.987942	FALSE	None
A4GNT	4	-0.283035	0.0306964	4	-0.398053	0.283118	-0.125586	0.656159	0.943287	FALSE	None
AAAS	4	-0.26079	0.329325	4	-0.359377	0.393373	-0.101606	0.77187	0.965321	FALSE	None
AACS	4	0.162556	0.0904542	4	0.413279	0.770037	0.0287457	0.916586	0.989457	FALSE	None
AADACL2	4	-0.183281	0.123598	4	-0.339827	0.355707	-0.183474	0.490451	0.896574	FALSE	None
AADACL3	4	-0.119001	0.100969	4	-0.226901	0.38124	-0.118669	0.69349	0.950651	FALSE	None
AADACL4	4	-0.227925	0.244402	4	-0.361507	0.109559	-0.159767	0.532428	0.907742	FALSE	None
AADAC	4	0.269521	0.844036	4	-0.0858388	0.171069	-0.507199	0.11355	0.661883	FALSE	None
AADAT	4	0.328533	0.175488	4	0.211648	0.119831	-0.264046	0.325928	0.830857	FALSE	None
AAED1	4	0.0221404	0.130777	4	0.145814	0.199853	0.0574352	0.824171	0.972803	FALSE	None
AAGAB	4	-0.493573	1.28334	4	-0.438375	0.750627	-0.0593512	0.827798	0.97296	FALSE	None
AAK1	4	-0.367015	0.125696	4	-0.714642	0.150274	-0.384366	0.162854	0.719952	FALSE	None
AAMDC	4	0.362629	0.124848	4	0.123123	0.222337	-0.314406	0.304101	0.821306	FALSE	None
AAMP	4	-2.70031	1.21838	4	-2.05872	1.95114	0.365155	0.208945	0.755507	FALSE	None
AANAT	4	-0.188725	0.0833686	4	0.0763665	0.442533	0.235183	0.427869	0.873804	FALSE	None
AAR2	4	0.0721255	0.0253106	4	0.286041	0.924464	0.0248379	0.928566	0.991268	FALSE	None
AARD	4	-0.695275	1.18941	4	-0.308188	0.705072	0.214206	0.455682	0.883448	FALSE	None
AARS2	4	-0.950057	2.44083	4	-0.359705	1.63492	0.0770978	0.840548	0.97389	FALSE	None
AARSD1	NA	NA	NA	NA	NA	NA	NA	NA	NA	NA	None
AARS	4	-3.51415	0.155369	4	-3.30862	0.258531	-0.152138	0.553977	0.913683	FALSE	None
AASDHPPT	4	-2.94688	0.348588	4	-2.911	0.946164	-0.307941	0.261668	0.796139	FALSE	None
AASDH	4	-0.439617	0.537141	4	-0.508092	0.137601	-0.112168	0.686134	0.950205	FALSE	None
AASS	4	0.138387	0.0641824	4	0.2977	0.468016	-0.00942331	0.970348	0.995533	FALSE	None
AATF	4	-1.21591	0.198945	4	-0.746501	1.4016	0.330573	0.392037	0.861828	FALSE	None
AATK	4	-0.554256	0.175303	4	-0.145614	0.171976	0.405562	0.196022	0.745385	FALSE	None
ABAT	4	0.264361	0.15821	4	0.475693	0.455338	0.0116536	0.9698	0.995533	FALSE	None
ABCA10	3	-0.232351	0.273531	3	-0.446298	0.297931	-0.214005	0.572903	0.919787	FALSE	None
ABCA12	4	0.0475759	0.160077	4	0.114658	0.0994471	0.0406119	0.884234	0.982343	FALSE	None
ABCA13	4	-0.529538	0.0697154	4	-0.0841852	0.159473	0.434198	0.109163	0.655948	FALSE	None
ABCA1	4	0.262783	0.610253	4	0.298691	0.0949376	-0.0709395	0.848302	0.975956	FALSE	None
ABCA2	4	0.0778404	0.221211	4	0.0168029	0.368529	-0.161008	0.557632	0.91485	FALSE	None
ABCA3	4	-0.367393	0.806079	4	0.0487309	0.000653346	0.37764	0.256246	0.794331	FALSE	None
ABCA4	3	-0.0162447	0.103252	3	0.0251858	1.79403	-0.155596	0.667363	0.945592	FALSE	None
ABCA5	4	-0.0164895	0.507014	4	0.102736	0.0413557	0.0654971	0.826986	0.97296	FALSE	None
ABCA6	4	-0.0890978	0.0743484	4	-0.168613	0.629885	-0.133686	0.647596	0.942495	FALSE	None
ABCA7	4	-0.0753028	0.244911	4	-0.068775	0.196373	-0.0192447	0.946867	0.992159	FALSE	None
ABCA8	4	-0.00279074	0.154939	4	0.331951	0.128382	0.307275	0.320772	0.82758	FALSE	None
ABCA9	4	0.0731109	0.158337	4	0.259796	0.305687	0.0687094	0.794285	0.967945	FALSE	None
ABCB10	4	-0.0247212	0.102369	4	-0.144867	0.197561	-0.139163	0.602374	0.929595	FALSE	None
ABCB11	4	0.0518844	0.195841	4	-0.116788	0.087116	-0.195008	0.469127	0.888171	FALSE	None
ABCB1	4	-0.290509	0.40832	4	0.376146	0.941869	0.475608	0.107724	0.653787	FALSE	None
ABCB4	4	-0.0279851	0.0646173	4	-0.252132	0.272416	-0.233366	0.415254	0.869415	FALSE	None
ABCB5	4	0.11969	0.416037	4	0.128529	0.455199	-0.152006	0.552679	0.913242	FALSE	None
ABCB6	4	-0.0269187	0.495699	4	0.0865407	0.1554	0.0306871	0.90857	0.98823	FALSE	None
ABCB7	4	-2.37938	1.64737	4	-2.1596	1.51761	-0.0514163	0.838652	0.973182	FALSE	None
ABCB8	4	-0.417679	0.192391	4	-0.185705	0.146681	0.228585	0.430937	0.87523	FALSE	None
ABCB9	4	-0.451222	0.217425	4	-0.204387	0.18469	0.245365	0.431359	0.875478	FALSE	None
ABCC10	4	-0.0544824	0.110039	4	0.0392085	0.275007	0.0466605	0.861409	0.979214	FALSE	None
ABCC11	4	-0.167934	0.576075	4	0.12116	0.193853	0.219882	0.5153	0.903131	FALSE	None
ABCC12	4	-0.0540522	0.0644229	4	0.495196	0.111547	0.46284	0.0853449	0.616004	FALSE	None
ABCC1	4	-0.000396966	0.351766	4	0.530721	0.338747	0.366862	0.268291	0.801952	FALSE	None
ABCC2	4	-0.126828	0.022013	4	-0.122979	0.13689	0.0058829	0.98225	0.997462	FALSE	None
ABCC3	4	-0.0933339	0.840513	4	0.298673	0.454419	0.179817	0.49768	0.899102	FALSE	None
ABCC4	4	0.221736	0.158964	4	0.446876	0.0662592	0.0713107	0.792127	0.96772	FALSE	None
ABCC5	4	0.215401	0.0124877	4	0.136141	0.0492148	-0.120688	0.635614	0.940835	FALSE	None
ABCC6	4	-1.27921	0.0861259	4	-0.054803	0.172922	1.1675	0.000642819	0.0527592	TRUE	Positive
ABCC8	4	-0.0156489	0.320448	4	-0.00914114	0.069282	-0.0252492	0.930596	0.991578	FALSE	None
ABCC9	4	-0.259622	0.213747	4	0.0727015	0.26574	0.291611	0.286172	0.811259	FALSE	None
ABCD1	4	0.0545617	0.302556	4	-0.359847	0.346351	-0.490723	0.0672542	0.578187	FALSE	None
ABCD2	4	-0.223684	0.0458245	4	-0.222567	0.156942	-0.00418909	0.987058	0.997462	FALSE	None
ABCD3	4	-0.00150614	0.694661	4	-0.0585584	0.369141	-0.216698	0.432209	0.876165	FALSE	None
ABCD4	4	-0.273972	0.0348634	4	-0.363535	0.711254	-0.121844	0.690656	0.950567	FALSE	None
ABCE1	4	-2.4625	1.6741	4	-2.39481	0.613887	-0.235417	0.389154	0.860621	FALSE	None
ABCF1	4	-1.46632	3.4772	4	-1.11416	3.24615	0.152443	0.575566	0.921157	FALSE	None
ABCF2	4	-0.252181	0.266089	4	-1.13127	0.219588	-0.942342	0.00572563	0.199774	TRUE	Negative
ABCF3	4	0.0955008	0.147825	4	-0.125438	0.893831	-0.370831	0.196854	0.746438	FALSE	None
ABCG1	4	-0.410187	1.14766	4	-0.257661	1.06011	-0.155691	0.568723	0.919124	FALSE	None
ABCG2	4	0.182787	0.0395487	4	0.196905	0.473134	-0.0494669	0.873001	0.980908	FALSE	None
ABCG4	3	0.273525	0.0515754	3	0.182603	0.605612	-0.254748	0.418578	0.871431	FALSE	None
ABCG5	4	-0.232183	0.718779	4	-0.302129	0.497726	-0.179454	0.604946	0.93064	FALSE	None
ABCG8	4	-0.0561822	0.377434	4	0.087548	0.0434088	0.10399	0.719925	0.953282	FALSE	None
ABHD10	4	-0.150325	0.510114	4	-0.49556	0.215768	-0.370384	0.216834	0.764445	FALSE	None
ABHD11	4	-1.61427	0.97558	4	-1.12602	0.781458	0.306958	0.237854	0.781411	FALSE	None
ABHD12B	4	-0.297835	0.0901876	4	-0.3662	0.0979391	-0.0705936	0.792614	0.967781	FALSE	None
ABHD12	4	-0.214036	0.351323	4	0.0674206	0.072877	0.243023	0.3709	0.852232	FALSE	None
ABHD13	4	-0.0713302	0.117544	4	-0.0602516	0.113382	0.00411044	0.987864	0.997691	FALSE	None
ABHD14A	4	-0.0674068	0.25784	4	-0.156083	0.592609	-0.171667	0.513138	0.903051	FALSE	None
ABHD14B	4	-0.429681	0.0484957	4	-0.146125	0.480131	0.265303	0.380922	0.857179	FALSE	None
ABHD15	4	-0.32531	0.522586	4	0.168445	0.00886991	0.455816	0.136347	0.692338	FALSE	None
ABHD16A	4	-0.49316	0.389072	4	-0.324384	0.777404	0.114581	0.711443	0.951674	FALSE	None
ABHD16B	4	0.0247928	0.45274	4	0.0856992	0.18739	0.0319661	0.924169	0.990689	FALSE	None
ABHD17A	3	-0.49271	0.224739	3	-0.0231524	0.0475437	0.459512	0.151356	0.71111	FALSE	None
ABHD17B	4	-0.14294	0.251694	4	0.34292	1.09832	0.36125	0.325147	0.830287	FALSE	None
ABHD17C	4	-0.242866	0.18218	4	0.296464	0.894746	0.42918	0.167527	0.724739	FALSE	None
ABHD1	4	0.257914	0.077695	4	0.00386893	0.164217	-0.298776	0.27961	0.807977	FALSE	None
ABHD2	4	-0.172884	0.350776	4	-0.0495938	0.548616	0.0833861	0.794212	0.967945	FALSE	None
ABHD3	4	-0.0166922	0.196371	4	0.544372	0.0304879	0.484372	0.116063	0.661883	FALSE	None
ABHD4	4	-0.0451271	0.342537	4	-0.0479223	0.627426	-0.173627	0.537867	0.908375	FALSE	None
ABHD5	4	-0.0195621	0.0418711	4	0.192031	0.0773019	0.185184	0.470742	0.889126	FALSE	None
ABHD6	4	0.238644	0.115796	4	-0.0389521	0.304526	-0.347507	0.209531	0.755507	FALSE	None
ABHD8	4	0.190908	0.206836	4	0.430154	0.370557	0.148347	0.665002	0.945323	FALSE	None
ABI1	4	-0.204114	0.340147	4	-0.522743	0.276718	-0.348008	0.222526	0.768767	FALSE	None
ABI2	4	-0.257587	0.198174	4	-0.639641	0.580468	-0.470934	0.0935965	0.634559	FALSE	None
ABI3BP	4	-0.115194	0.0565124	4	0.155206	0.320191	0.252782	0.39511	0.863207	FALSE	None
ABI3	4	-0.23059	0.285446	4	-0.28377	1.49182	-0.125823	0.719724	0.953282	FALSE	None
ABL1	4	-0.261894	0.402942	4	-0.806708	0.542544	-0.616853	0.0331304	0.455679	FALSE	None
ABL2	4	0.37846	1.20812	4	0.078452	0.303018	-0.597019	0.0766861	0.601302	FALSE	None
ABLIM1	4	-0.287897	0.226524	4	-0.367485	0.461362	-0.122529	0.640883	0.942193	FALSE	None
ABLIM2	4	-0.266008	0.241596	4	-0.0805274	0.377836	0.120495	0.648682	0.942495	FALSE	None
ABLIM3	4	0.124359	0.201672	4	0.561708	0.712482	0.132759	0.627837	0.937492	FALSE	None
ABRACL	4	0.278972	0.070851	4	0.159334	0.185679	-0.224108	0.387056	0.860045	FALSE	None
ABRA	4	0.270588	0.0593507	4	0.598645	0.152697	0.158148	0.579135	0.922525	FALSE	None
ABR	4	0.129128	0.234662	4	0.969827	0.94436	0.47349	0.174238	0.729303	FALSE	None
ABT1	4	-2.20645	0.292889	4	-1.84976	0.258481	0.0522758	0.852814	0.97724	FALSE	None
ABTB1	4	-0.0202534	0.109001	4	-0.0893113	0.118357	-0.0915641	0.718174	0.953245	FALSE	None
ABTB2	4	0.308726	0.122148	4	0.148819	0.296442	-0.281048	0.323627	0.829342	FALSE	None
AC007040.11	3	0.0130153	0.032874	3	0.34255	0.0178282	0.29026	0.345661	0.843776	FALSE	None
AC007431.1	4	-0.904308	0.847239	4	-0.466062	1.40235	0.26858	0.413853	0.868947	FALSE	None
AC009892.10	NA	NA	NA	NA	NA	NA	NA	NA	NA	NA	None
AC016722.1	4	-0.550502	0.308073	4	-0.0803021	0.089171	0.45581	0.121501	0.670211	FALSE	None
AC016757.3	4	-0.0787442	0.00896908	4	0.458449	0.278362	0.475458	0.101016	0.646052	FALSE	None
AC018755.1	4	-0.0601257	0.35881	4	0.145427	0.0968634	0.116733	0.672186	0.947043	FALSE	None
AC079612.1	4	0.39529	0.202838	4	-0.0954016	0.0604313	-0.550372	0.0613927	0.566821	FALSE	None
AC091801.1	3	0.48352	0.0718421	3	0.131124	0.175884	-0.494345	0.118834	0.666677	FALSE	None
AC093802.1	4	0.295378	0.160994	4	0.390028	0.314594	-0.077618	0.789324	0.967356	FALSE	None
AC106876.2	4	0.0647458	0.116896	4	0.30789	0.308215	0.124117	0.638569	0.942161	FALSE	None
ACAA1	3	-0.262955	0.575541	3	0.0100125	0.117429	0.278229	0.473007	0.890513	FALSE	None
ACAA2	4	0.110885	0.0674755	4	0.392011	0.292882	0.170527	0.537369	0.908375	FALSE	None
ACACA	4	-1.71967	2.50567	4	-0.426982	4.87139	0.5868	0.0912171	0.629075	FALSE	None
ACACB	4	-0.107856	0.0101001	4	0.21979	0.242458	0.307465	0.27382	0.805667	FALSE	None
ACAD10	4	-0.127285	0.509033	4	-0.605523	0.34584	-0.535893	0.0663747	0.577417	FALSE	None
ACAD11	4	-0.0869184	0.189516	4	0.0639441	1.06815	-0.0564833	0.8359	0.97296	FALSE	None
ACAD8	4	0.153283	0.19075	4	-0.574591	0.0712522	-0.736135	0.010774	0.275444	TRUE	Negative
ACAD9	4	-2.26879	0.360621	4	-0.381185	0.273209	1.69354	2.20998e-05	0.00657899	TRUE	Positive
ACADL	4	-0.0574679	0.373195	4	0.418375	0.0834346	0.413023	0.208507	0.755507	FALSE	None
ACADM	4	-0.419046	1.10817	4	-0.150122	0.312065	0.112123	0.732822	0.956085	FALSE	None
ACADSB	4	0.00582929	0.264454	4	0.15785	0.15353	0.122253	0.692765	0.950651	FALSE	None
ACADS	4	-0.0193428	0.668095	4	0.0201817	0.18983	-0.0156518	0.962052	0.994438	FALSE	None
ACADVL	4	-0.0756643	0.266786	4	0.263185	0.410003	0.258416	0.421564	0.873117	FALSE	None
ACAN	4	-0.261062	1.0851	4	-0.346273	0.795205	-0.185706	0.515723	0.903131	FALSE	None
ACAP1	4	-0.17467	0.336446	4	-0.393587	0.316812	-0.271187	0.298166	0.818407	FALSE	None
ACAP2	4	-0.00405694	0.267246	4	0.111822	0.347353	0.0563074	0.856572	0.978447	FALSE	None
ACAP3	4	-0.680206	0.539771	4	-0.447281	0.684526	0.146665	0.612944	0.932082	FALSE	None
ACAT1	4	-0.196708	0.221943	4	-0.44103	0.270801	-0.259425	0.388629	0.860441	FALSE	None
ACAT2	4	-0.0839591	0.723377	4	0.0931786	0.626961	-0.119401	0.690486	0.950567	FALSE	None
ACBD3	4	0.204032	0.412856	4	-0.187279	0.151194	-0.496109	0.0807881	0.610058	FALSE	None
ACBD4	4	-0.81232	0.514015	4	-0.761446	0.409854	-0.0587483	0.817534	0.971541	FALSE	None
ACBD5	4	0.230168	0.0599448	4	0.3696	0.24645	0.0191219	0.945512	0.992145	FALSE	None
ACBD6	4	-0.0893276	0.0873819	4	0.180317	0.279666	0.237827	0.412589	0.868	FALSE	None
ACBD7	4	-0.14622	0.344771	4	0.0752614	0.0659851	0.202218	0.498552	0.899102	FALSE	None
ACCSL	4	0.151587	0.0443576	4	0.120184	0.0890348	-0.0629163	0.812194	0.971216	FALSE	None
ACCS	4	-0.0414993	0.31379	4	-0.551497	0.4594	-0.623365	0.0249202	0.40571	FALSE	None
ACD	4	-0.83354	0.0033656	4	-0.395065	0.0761323	0.394849	0.142526	0.697868	FALSE	None
ACE2	4	-0.113162	0.270624	4	0.211873	1.06908	0.221787	0.542605	0.91012	FALSE	None
ACER1	4	-0.522131	0.155142	4	0.12581	0.14433	0.62479	0.0250587	0.40571	FALSE	None
ACER2	4	0.136827	0.403448	4	0.618506	0.0665589	0.233829	0.459368	0.884628	FALSE	None
ACER3	4	-0.40511	0.635094	4	-0.276932	0.0684423	0.0856732	0.757203	0.963369	FALSE	None
ACE	4	-0.0550431	0.304601	4	0.0615408	0.169121	0.0563499	0.833015	0.97296	FALSE	None
ACHE	4	-0.330866	0.032381	4	0.589436	0.205677	0.886763	0.00565951	0.19841	TRUE	Positive
ACIN1	4	-0.320608	0.0786662	4	-0.636189	0.0589924	-0.332792	0.23136	0.774316	FALSE	None
ACKR2	4	-0.0152057	0.123611	4	-0.0901619	0.236918	-0.0858164	0.768693	0.965045	FALSE	None
ACKR3	4	0.31435	0.0160771	4	-0.187011	0.0563048	-0.51436	0.0568657	0.551208	FALSE	None
ACKR4	4	-0.2807	0.0124221	4	-0.476096	0.0811046	-0.199485	0.448372	0.881735	FALSE	None
ACLY	4	-1.85323	1.64578	4	-1.97111	2.89515	-0.344342	0.40142	0.865614	FALSE	None
ACMSD	4	-0.468887	0.500802	4	-0.593744	0.197678	-0.182948	0.489442	0.896126	FALSE	None
ACN9	4	-0.7035	0.427975	4	-0.331388	0.248095	0.322849	0.261086	0.796139	FALSE	None
ACO1	4	0.0629944	0.466986	4	0.578589	0.181562	0.301205	0.321029	0.82758	FALSE	None
ACO2	4	-1.55194	1.23412	4	-1.90315	1.69271	-0.599853	0.0458384	0.513155	FALSE	None
ACOT11	4	-0.281691	0.0830497	4	0.169539	0.949913	0.380119	0.261679	0.796139	FALSE	None
ACOT12	3	-0.160322	0.182636	3	-0.0303651	0.0761158	0.137482	0.674969	0.947352	FALSE	None
ACOT13	4	-0.335476	0.171722	4	-0.0680199	0.451512	0.219066	0.438708	0.878364	FALSE	None
ACOT2	4	-0.262949	0.394386	4	-0.317914	0.0821393	-0.0743231	0.795039	0.967945	FALSE	None
ACOT4	4	-0.582385	0.57666	4	-0.261542	0.202479	0.276259	0.291203	0.81475	FALSE	None
ACOT6	4	0.184112	0.415163	4	0.218121	0.234067	-0.162408	0.566638	0.918883	FALSE	None
ACOT7	4	-0.120432	0.673294	4	-0.409167	0.0393091	-0.317946	0.313058	0.825253	FALSE	None
ACOT8	4	-0.227684	0.673191	4	0.159836	0.15213	0.320636	0.306976	0.82227	FALSE	None
ACOT9	4	0.141267	0.152137	4	-0.0637357	0.109552	-0.2144	0.46602	0.886706	FALSE	None
ACOX1	4	0.154935	0.0409443	4	0.576525	0.139706	0.265976	0.316916	0.825254	FALSE	None
ACOX2	4	-0.318983	0.0885611	4	-0.277366	0.372693	0.0363452	0.905835	0.987959	FALSE	None
ACOX3	4	0.122954	0.101043	4	0.0143068	0.374964	-0.181798	0.505936	0.900718	FALSE	None
ACOXL	4	0.023801	0.446553	4	-0.113824	0.0469222	-0.183967	0.523482	0.905294	FALSE	None
ACP1	4	-0.00276363	0.112486	4	0.0668939	0.206951	0.0268768	0.918875	0.989457	FALSE	None
ACP2	4	-0.187771	0.473715	4	0.0850589	0.16468	0.2642	0.440795	0.879064	FALSE	None
ACP5	4	-0.0208596	0.121882	4	0.169698	0.259963	0.127525	0.635722	0.940842	FALSE	None
ACP6	4	0.0704445	0.22498	4	-0.335077	0.617343	-0.465687	0.153367	0.711464	FALSE	None
ACPL2	4	0.164874	0.446084	4	0.0307652	0.186083	-0.24257	0.451812	0.88252	FALSE	None
ACPP	4	0.243564	0.365531	4	0.278634	0.056174	-0.0695106	0.826671	0.97285	FALSE	None
ACPT	3	-0.29309	0.241179	3	0.105082	2.18723	0.0676434	0.837252	0.97296	FALSE	None
ACRBP	4	-0.305659	0.184611	4	-0.478037	0.172918	-0.199896	0.439407	0.878914	FALSE	None
ACRC	3	0.359401	0.37606	3	0.0189547	0.416041	-0.552948	0.100654	0.645707	FALSE	None
ACRV1	4	-0.113403	0.502835	4	-0.06656	0.436922	-0.0347673	0.907054	0.988184	FALSE	None
ACR	4	-0.869328	0.273489	4	-1.03502	0.391612	-0.283181	0.292966	0.815309	FALSE	None
ACSBG1	4	0.0501879	0.0757393	4	0.259457	0.496223	0.0849707	0.751924	0.962243	FALSE	None
ACSBG2	4	-0.357973	0.0570707	4	-0.277316	0.264071	0.081046	0.786936	0.96669	FALSE	None
ACSF2	4	-0.122584	0.0293934	4	-0.474696	0.185605	-0.351595	0.215238	0.762033	FALSE	None
ACSF3	4	-0.521986	0.508206	4	-0.476258	0.625638	-0.0249363	0.931665	0.991582	FALSE	None
ACSL1	4	0.376084	0.172573	4	1.18097	1.68499	-0.0223222	0.941411	0.992014	FALSE	None
ACSL3	4	-0.0246312	0.0852162	4	0.975733	2.11512	0.432767	0.107834	0.654161	FALSE	None
ACSL4	4	0.0813607	0.138317	4	-0.0105872	0.0267979	-0.092194	0.742924	0.959991	FALSE	None
ACSL5	4	-0.29557	1.66395	4	-0.286112	0.679314	-0.188884	0.568609	0.919124	FALSE	None
ACSL6	4	0.00283734	0.487785	4	0.187321	0.35065	0.0867273	0.788363	0.967235	FALSE	None
ACSM1	4	-0.0905421	0.392098	4	0.444516	1.07912	0.469922	0.281106	0.808881	FALSE	None
ACSM2A	NA	NA	NA	NA	NA	NA	NA	NA	NA	NA	None
ACSM2B	4	-0.305609	0.115649	4	0.0332328	0.317075	0.302735	0.278025	0.807472	FALSE	None
ACSM3	4	-0.279146	0.232458	4	-0.203612	0.0156292	0.073002	0.786161	0.966542	FALSE	None
ACSM4	4	-0.246278	0.334749	4	0.0464896	0.146917	0.267922	0.379666	0.857149	FALSE	None
ACSM5	4	-0.289725	0.144633	4	0.115287	0.657757	0.306162	0.257822	0.795974	FALSE	None
ACSS1	4	-0.273884	0.0157344	4	-0.319264	0.0477462	-0.0405334	0.874612	0.981151	FALSE	None
ACSS2	4	-0.0514125	0.242729	4	0.13225	0.180207	0.129304	0.63695	0.941232	FALSE	None
ACSS3	3	-0.332744	0.373018	3	-0.132323	0.873875	0.104137	0.757349	0.963369	FALSE	None
ACTA1	3	0.121131	0.279183	3	-0.103657	0.22071	-0.256112	0.450025	0.881813	FALSE	None
ACTA2	4	0.586493	0.0544369	4	0.226599	0.239579	-0.571355	0.0398905	0.488549	FALSE	None
ACTBL2	4	0.110384	0.0920173	4	-0.202836	0.134732	-0.322448	0.243081	0.784855	FALSE	None
ACTB	3	-2.02989	0.319102	3	-1.90122	0.214863	-0.167607	0.589167	0.926008	FALSE	None
ACTC1	4	-0.497205	0.215546	4	-0.26161	0.932399	0.13994	0.617555	0.932582	FALSE	None
ACTG1	4	-1.18699	0.229166	4	-1.76471	1.45097	-0.779999	0.0345795	0.465049	FALSE	None
ACTG2	4	-0.33298	0.505337	4	-0.338473	0.486037	-0.106384	0.69217	0.950651	FALSE	None
ACTL10	4	-0.157521	0.208719	4	0.08639	0.0371966	0.220985	0.4174	0.870876	FALSE	None
ACTL6A	3	-2.56524	3.64233	3	-2.66732	2.6742	-0.366948	0.247752	0.787329	FALSE	None
ACTL6B	4	-0.216082	0.0875594	4	-0.138809	0.262011	0.0441258	0.863265	0.979752	FALSE	None
ACTL7A	4	0.0334194	0.586384	4	-0.06692	0.356056	-0.121315	0.7525	0.96256	FALSE	None
ACTL7B	4	-0.204511	0.168742	4	0.417805	0.095913	0.569298	0.0533791	0.542226	FALSE	None
ACTL8	3	0.223271	0.0258955	3	-0.31536	0.101327	-0.539853	0.095976	0.637416	FALSE	None
ACTL9	4	0.229471	0.0389026	4	0.141202	0.196345	-0.154436	0.565529	0.918293	FALSE	None
ACTN1	4	0.067097	0.67723	4	0.314292	0.256128	0.0261481	0.929065	0.991318	FALSE	None
ACTN2	4	0.0854358	0.0251854	4	0.184215	0.354766	0.0400914	0.887441	0.983564	FALSE	None
ACTN4	4	0.335554	0.154406	4	0.54776	0.0436971	0.00989008	0.972063	0.995645	FALSE	None
ACTR10	4	-2.59372	0.469487	4	-2.72309	0.717184	-0.463537	0.0866775	0.618051	FALSE	None
ACTR1A	4	-1.47174	1.60196	4	-1.02938	0.753801	0.210148	0.436504	0.877538	FALSE	None
ACTR1B	4	-0.999694	2.90025	4	-1.51378	1.26507	-0.655968	0.030829	0.435975	FALSE	None
ACTR2	4	-3.16217	0.215118	4	-2.77705	0.0739575	0.0150325	0.953232	0.992824	FALSE	None
ACTR3B	3	-0.348257	0.203001	3	-0.600757	0.215406	-0.284955	0.352938	0.847622	FALSE	None
ACTR3C	NA	NA	NA	NA	NA	NA	NA	NA	NA	NA	None
ACTR3	4	-1.64199	1.25897	4	-1.2376	0.752886	0.208624	0.524879	0.905764	FALSE	None
ACTR5	4	-1.92997	1.83048	4	-2.21704	0.4696	-0.557582	0.0668559	0.577971	FALSE	None
ACTR6	4	-3.82495	0.316969	4	-3.06939	0.260522	0.397875	0.241151	0.783603	FALSE	None
ACTR8	4	-2.40052	0.807503	4	-2.12406	0.779208	-0.0282661	0.917116	0.989457	FALSE	None
ACTRT1	4	0.523124	0.0900776	4	0.00732693	0.089562	-0.598083	0.0443148	0.508058	FALSE	None
ACTRT2	4	0.0699513	0.132174	4	-0.0250432	0.119153	-0.117561	0.668752	0.945618	FALSE	None
ACTRT3	4	-0.29947	0.0505061	4	-0.0905979	0.170122	0.196758	0.447172	0.8811	FALSE	None
ACVR1B	4	-0.153062	0.395508	4	-0.143436	0.619408	-0.0506772	0.870216	0.980654	FALSE	None
ACVR1C	4	0.251419	0.134716	4	0.431366	0.0337204	0.0403897	0.882657	0.982343	FALSE	None
ACVR1	4	-0.859283	0.182073	4	-0.799313	0.165019	-0.0284294	0.927096	0.991268	FALSE	None
ACVR2A	4	-0.433132	0.150915	4	-0.657938	0.021634	-0.256841	0.337215	0.83999	FALSE	None
ACVR2B	4	-0.865997	0.588075	4	-0.5314	1.2013	0.236988	0.471817	0.889927	FALSE	None
ACVRL1	4	-0.43506	0.210242	4	-0.897063	0.405987	-0.522093	0.106463	0.652675	FALSE	None
ACY1	4	-0.451476	0.117467	4	-0.231325	0.0146069	0.216967	0.401861	0.865822	FALSE	None
ACY3	4	-0.170314	0.14244	4	-0.227976	0.372052	-0.0981371	0.714447	0.952541	FALSE	None
ACYP1	4	0.295257	0.128029	4	0.346841	0.998591	-0.207854	0.492003	0.897729	FALSE	None
ACYP2	4	-0.124504	0.263597	4	-0.298263	0.251052	-0.210129	0.423142	0.873117	FALSE	None
ADAD1	4	0.287203	0.126356	4	-0.0377111	0.206558	-0.382159	0.184006	0.736003	FALSE	None
ADAD2	4	0.639079	0.043494	4	0.856947	1.02154	-0.417823	0.12775	0.678706	FALSE	None
ADAL	4	-0.0743839	0.618912	4	-0.575209	0.0965857	-0.528986	0.106054	0.651536	FALSE	None
ADAM10	4	0.37412	0.0679642	4	0.424634	0.512823	-0.153417	0.610173	0.932082	FALSE	None
ADAM11	4	-0.393054	0.180063	4	-0.318445	0.130239	0.0623151	0.820008	0.97169	FALSE	None
ADAM12	4	-0.263626	0.152784	4	0.288798	0.355067	0.476033	0.0861718	0.617485	FALSE	None
ADAM15	4	0.0503437	0.8575	4	-0.0327076	0.807807	-0.298201	0.284585	0.810911	FALSE	None
ADAM17	3	0.337807	0.374508	3	1.05315	1.0945	0.270303	0.53464	0.908375	FALSE	None
ADAM18	4	-0.114633	0.0667269	4	-0.360998	0.110269	-0.245743	0.357867	0.848717	FALSE	None
ADAM19	4	-0.186125	0.122319	4	-0.224584	0.251439	-0.0625303	0.812061	0.971216	FALSE	None
ADAM20	4	-0.123343	0.259471	4	0.230092	0.679796	0.233023	0.458792	0.884603	FALSE	None
ADAM21	4	0.0628443	0.476988	4	-0.944727	0.282474	-1.02716	0.00948642	0.256349	TRUE	Negative
ADAM22	4	-0.192514	0.0638123	4	-0.162023	0.165735	0.0160218	0.950192	0.992159	FALSE	None
ADAM23	4	0.259156	0.207123	4	0.376442	0.178814	-0.0516636	0.850929	0.976746	FALSE	None
ADAM28	4	0.0539847	0.260098	4	0.322266	0.442347	0.0972997	0.703951	0.950651	FALSE	None
ADAM29	4	0.176582	0.0881564	4	0.235474	0.160108	-0.0360152	0.888428	0.984005	FALSE	None
ADAM2	4	0.105591	0.0612465	4	0.271642	0.269417	0.104308	0.719257	0.953282	FALSE	None
ADAM30	4	-0.417665	0.0853115	4	-0.43836	0.0834051	-0.0325204	0.904806	0.987739	FALSE	None
ADAM32	4	0.274041	0.0984889	4	-0.0219626	0.0609275	-0.338436	0.205308	0.753928	FALSE	None
ADAM33	4	-0.369339	0.443528	4	-0.154055	0.795955	0.162542	0.632002	0.938968	FALSE	None
ADAM7	4	-0.12905	0.22623	4	-0.110048	0.829864	-0.0730972	0.790206	0.967645	FALSE	None
ADAM8	4	-0.00419118	0.167482	4	0.210223	0.894447	0.00989003	0.970423	0.995533	FALSE	None
ADAM9	4	-0.393094	0.531306	4	-0.501325	0.141995	-0.176546	0.506553	0.901078	FALSE	None
ADAMDEC1	4	0.331432	0.275471	4	0.111472	0.271611	-0.338521	0.282185	0.809059	FALSE	None
ADAMTS10	4	-0.338888	0.289544	4	0.0137639	0.608708	0.341123	0.357164	0.848717	FALSE	None
ADAMTS12	3	0.0965726	0.149421	3	-0.479387	0.166349	-0.588327	0.0676471	0.579587	FALSE	None
ADAMTS13	4	-0.162646	0.192115	4	-0.0594398	0.204127	0.0821066	0.766364	0.964305	FALSE	None
ADAMTS14	4	0.0609775	0.194994	4	-0.332857	0.332668	-0.443465	0.105887	0.651536	FALSE	None
ADAMTS15	4	0.35722	0.108436	4	0.452362	0.180644	-0.133447	0.607172	0.931305	FALSE	None
ADAMTS16	4	-0.326202	1.26206	4	-0.561168	0.446056	-0.319996	0.239439	0.782235	FALSE	None
ADAMTS17	4	-0.0980392	0.267953	4	-0.0695756	0.173678	0.00946593	0.974108	0.995956	FALSE	None
ADAMTS18	4	0.241889	0.0731336	4	0.151125	0.240938	-0.194647	0.446324	0.880446	FALSE	None
ADAMTS19	4	0.119991	0.615667	4	-0.15603	0.622083	-0.525365	0.0794459	0.607603	FALSE	None
ADAMTS1	4	-0.447931	1.00709	4	-0.42006	0.876145	-0.0927552	0.714559	0.952541	FALSE	None
ADAMTS20	4	0.38117	0.371363	4	0.214646	0.859847	-0.511688	0.0764345	0.601302	FALSE	None
ADAMTS2	4	-0.372918	0.789416	4	-0.455766	1.54038	-0.16718	0.590762	0.926509	FALSE	None
ADAMTS3	4	-0.237593	0.0114779	4	-0.0533614	0.62045	0.157772	0.613392	0.932082	FALSE	None
ADAMTS4	4	-0.151744	0.0342196	4	-0.16463	0.216497	-0.0113761	0.967052	0.995263	FALSE	None
ADAMTS5	4	-0.061768	0.2559	4	0.0154031	0.231198	0.0283212	0.915596	0.989215	FALSE	None
ADAMTS7	4	0.0159028	0.375007	4	0.453206	0.0331254	0.302597	0.313047	0.825253	FALSE	None
ADAMTS8	4	0.290647	0.222258	4	-0.0323432	0.193976	-0.40947	0.131126	0.683068	FALSE	None
ADAMTS9	4	-0.187146	0.250652	4	-0.148765	0.189053	0.015139	0.957807	0.993124	FALSE	None
ADAMTSL1	4	0.11336	0.149003	4	-0.142801	0.174374	-0.278253	0.322171	0.828319	FALSE	None
ADAMTSL2	4	-0.143669	0.471985	4	0.142272	0.179204	0.210454	0.420512	0.872575	FALSE	None
ADAMTSL3	4	-0.576443	0.379888	4	-0.293873	0.196859	0.249422	0.407443	0.866542	FALSE	None
ADAMTSL4-AS1	4	0.199746	0.0713583	4	0.465212	0.959925	-0.0215112	0.93906	0.992014	FALSE	None
ADAMTSL4	4	0.0296518	0.668217	4	-0.0539321	0.203601	-0.179255	0.569991	0.919501	FALSE	None
ADAMTSL5	4	-0.501196	0.602182	4	-0.680016	0.205732	-0.260542	0.333873	0.83802	FALSE	None
ADAP1	4	-0.0103914	0.173129	4	-0.179873	0.442908	-0.1819	0.58181	0.923367	FALSE	None
ADAP2	4	-0.563175	0.264077	4	-0.0255946	0.190909	0.529591	0.0938976	0.634559	FALSE	None
ADARB1	4	0.189032	0.080441	4	0.412207	0.256241	0.0700806	0.789231	0.967356	FALSE	None
ADARB2	4	0.182475	0.218734	4	0.159638	0.117056	-0.108074	0.700352	0.950651	FALSE	None
ADAR	4	-0.157089	0.0769599	4	-0.333279	0.238977	-0.188092	0.491517	0.897308	FALSE	None
ADAT1	4	0.0047896	0.305487	4	0.794987	0.680522	0.41885	0.12417	0.673814	FALSE	None
ADAT2	3	-2.18739	4.04	3	-2.26126	4.33693	-0.284168	0.369196	0.851988	FALSE	None
ADAT3	4	-2.81652	1.55863	4	-2.02343	2.57308	0.516264	0.127848	0.679019	FALSE	None
ADA	4	-0.426094	0.151388	4	-0.295516	0.822201	0.0743281	0.807224	0.971009	FALSE	None
ADCK1	4	0.215265	0.140436	4	0.558588	0.522439	0.114441	0.698761	0.950651	FALSE	None
ADCK2	4	-0.206876	0.644844	4	0.117854	0.00845315	0.267747	0.390232	0.860724	FALSE	None
ADCK3	4	-0.141195	0.264187	4	-0.108648	0.0382885	0.0226591	0.934543	0.991866	FALSE	None
ADCK4	4	-0.177141	0.262503	4	0.0742613	0.0887443	0.218153	0.403225	0.866456	FALSE	None
ADCK5	3	0.0441746	0.867339	3	-0.0383232	0.45474	-0.3206	0.343809	0.843479	FALSE	None
ADCY10	4	-0.114334	0.0211634	4	-0.265814	0.672551	-0.176405	0.58002	0.922611	FALSE	None
ADCY1	4	-0.439224	0.0279393	4	-0.485116	0.574296	-0.0740243	0.81732	0.971541	FALSE	None
ADCY2	4	0.140675	0.0588513	4	0.173455	0.167614	-0.0333728	0.896807	0.985835	FALSE	None
ADCY3	4	0.132705	0.21421	4	-0.341364	0.0980792	-0.498107	0.0703352	0.585205	FALSE	None
ADCY4	4	-0.0942385	0.24459	4	-0.138937	0.182165	-0.0599239	0.835847	0.97296	FALSE	None
ADCY5	4	-0.087665	0.112635	4	-0.0427042	0.122989	0.0589889	0.840556	0.97389	FALSE	None
ADCY6	4	-0.0535588	0.109213	4	-0.0561186	0.39736	-0.0684111	0.792038	0.96772	FALSE	None
ADCY7	4	-0.683341	0.215135	4	0.000966938	0.453117	0.632803	0.0327666	0.451382	FALSE	None
ADCY8	3	-0.348185	0.204494	3	0.116853	0.0168779	0.464282	0.157548	0.714299	FALSE	None
ADCY9	4	-0.0701427	0.124215	4	-0.428934	0.0920353	-0.35921	0.18479	0.736003	FALSE	None
ADCYAP1R1	4	0.1066	0.395914	4	0.104287	0.157288	-0.137677	0.618363	0.932668	FALSE	None
ADCYAP1	4	-0.901656	3.95875	4	-0.710687	1.37522	0.0703	0.813877	0.971216	FALSE	None
ADC	4	-0.815344	0.180821	4	-0.609149	0.516778	0.119689	0.655246	0.943126	FALSE	None
ADD1	4	0.319214	0.06122	4	0.342149	0.0123621	-0.0857	0.74426	0.960581	FALSE	None
ADD2	4	-0.578006	0.629452	4	-0.500401	0.318695	0.027583	0.9144	0.989192	FALSE	None
ADD3	4	0.248651	0.683728	4	-0.138177	0.243809	-0.579629	0.0633259	0.56816	FALSE	None
ADGB	4	-0.148035	0.721987	4	-0.4813	1.17825	-0.530572	0.060788	0.566108	FALSE	None
ADH1A	4	0.223538	0.0584308	4	0.540186	0.262955	0.122117	0.647436	0.942495	FALSE	None
ADH1B	4	0.0570161	0.186649	4	0.086025	0.2546	-0.02976	0.91824	0.989457	FALSE	None
ADH4	4	0.0564376	0.0677599	4	0.203289	0.255521	0.107117	0.710074	0.951674	FALSE	None
ADH5	4	0.0418541	0.219097	4	-0.089476	0.657682	-0.176132	0.612251	0.932082	FALSE	None
ADH6	4	-0.00401479	0.117781	4	-0.270675	0.811132	-0.372898	0.196923	0.746438	FALSE	None
ADH7	4	0.296036	0.140231	4	0.0269724	0.112174	-0.352798	0.185006	0.736003	FALSE	None
ADHFE1	4	-0.0712163	0.930009	4	-0.0564699	0.516794	-0.182519	0.517216	0.90326	FALSE	None
ADI1	4	-0.978617	2.35725	4	-0.836552	0.858002	0.045041	0.889485	0.984368	FALSE	None
ADIG	4	0.247651	0.196166	4	0.0551093	0.165836	-0.270956	0.350249	0.846338	FALSE	None
ADIPOQ	4	0.266116	0.098582	4	0.749597	0.522551	0.212996	0.488722	0.896126	FALSE	None
ADIPOR1	4	-1.05676	0.258261	4	-0.729196	0.128619	0.223102	0.398129	0.863699	FALSE	None
ADIPOR2	4	0.283423	0.0643051	4	0.218657	0.0771138	-0.150108	0.566732	0.918883	FALSE	None
ADIRF	4	-0.925747	0.927249	4	-0.116623	3.14047	0.543924	0.150171	0.710941	FALSE	None
ADK	4	0.041681	0.0656014	4	-0.050628	0.343169	-0.130666	0.628339	0.937492	FALSE	None
ADM2	4	-0.182625	0.389993	4	-0.48511	0.785781	-0.465825	0.0845791	0.616004	FALSE	None
ADM5	4	-0.126044	0.128431	4	-0.401974	0.0698102	-0.276111	0.311463	0.824836	FALSE	None
ADM	4	0.0750639	0.230765	4	0.507925	0.224132	0.258899	0.355664	0.848717	FALSE	None
ADNP2	4	0.240663	0.247497	4	1.44483	0.19154	0.501999	0.118264	0.665582	FALSE	None
ADNP	4	-1.00851	1.41576	4	-0.134333	2.0034	0.754145	0.0259821	0.407984	FALSE	None
ADORA1	4	0.539038	0.249741	4	0.393353	0.111882	-0.406646	0.18373	0.736003	FALSE	None
ADORA2A	4	-0.253898	0.272001	4	-0.0103626	0.24554	0.206305	0.467809	0.888082	FALSE	None
ADORA2B	4	-0.313746	0.0507911	4	-0.358314	0.07708	-0.0411192	0.879609	0.981978	FALSE	None
ADORA3	4	-0.276458	0.211036	4	-0.263536	0.470163	-0.00287513	0.992914	0.998708	FALSE	None
ADO	4	-0.781346	3.26665	4	-0.448773	3.44646	0.155116	0.56781	0.919124	FALSE	None
ADPGK	4	-0.2586	0.22085	4	0.30929	0.926398	0.378621	0.204525	0.752468	FALSE	None
ADPRHL1	4	-0.0143249	0.260522	4	-0.0446915	0.253704	-0.0706981	0.797663	0.968425	FALSE	None
ADPRHL2	4	0.0997537	0.308668	4	0.338778	0.514466	0.0609133	0.839187	0.973224	FALSE	None
ADPRH	4	-0.444829	0.622192	4	-0.277304	0.138629	0.135217	0.631737	0.938812	FALSE	None
ADPRM	4	0.063458	0.083872	4	-0.0909695	0.245806	-0.166622	0.566501	0.918832	FALSE	None
ADRA1A	4	-0.62596	0.918309	4	0.0645508	0.0639943	0.651373	0.0672113	0.57811	FALSE	None
ADRA1B	4	0.0756123	0.14639	4	-0.0770602	0.215717	-0.182233	0.523626	0.905294	FALSE	None
ADRA1D	4	-0.451601	0.863557	4	-0.586223	0.931339	-0.271045	0.319853	0.827257	FALSE	None
ADRA2A	4	0.163132	0.152327	4	0.325071	0.536741	-0.0152986	0.956056	0.993124	FALSE	None
ADRA2B	4	-0.558374	0.527735	4	-0.0948618	0.626884	0.403484	0.180971	0.734422	FALSE	None
ADRA2C	4	0.260729	0.537037	4	0.312462	0.0204997	-0.11881	0.711108	0.951674	FALSE	None
ADRB1	4	0.270056	0.294838	4	-0.128515	0.148764	-0.4961	0.0838251	0.614972	FALSE	None
ADRB2	4	-0.423259	0.143236	4	-0.431646	0.0246992	-0.0259536	0.919388	0.989575	FALSE	None
ADRB3	4	0.0932301	0.278058	4	0.00444982	0.033818	-0.138132	0.615578	0.932082	FALSE	None
ADRBK1	4	-0.320177	0.168785	4	-0.0619672	0.0801851	0.262034	0.353817	0.847751	FALSE	None
ADRBK2	4	-0.0866596	0.0513519	4	0.197907	0.123493	0.257982	0.321336	0.828043	FALSE	None
ADRM1	4	-0.849786	1.02746	4	-0.997233	0.605703	-0.251655	0.337918	0.840214	FALSE	None
ADSL	4	-2.70938	0.498147	4	-2.80989	0.556095	-0.444941	0.107538	0.653402	FALSE	None
ADSSL1	4	-0.321865	0.107138	4	-0.302482	0.398547	-0.0117499	0.967235	0.995263	FALSE	None
ADSS	4	-2.05049	1.05607	4	-2.27498	0.070958	-0.534996	0.107218	0.653305	FALSE	None
ADTRP	4	0.225079	0.144854	4	0.352046	1.87871	-0.208554	0.544398	0.911044	FALSE	None
AEBP1	4	-0.369265	0.725584	4	-0.745831	0.987083	-0.497534	0.0706915	0.585948	FALSE	None
AEBP2	4	-0.118022	0.164823	4	-0.993601	0.0802656	-0.919525	0.00210867	0.113262	TRUE	Negative
AEN	4	-0.538949	0.238143	4	-0.614065	1.77246	-0.175863	0.630383	0.938581	FALSE	None
AES	4	-0.190983	0.140704	4	-0.190468	0.0448413	0.0152141	0.957232	0.993124	FALSE	None
AFAP1L1	4	0.0661811	0.309316	4	-0.0894021	0.154313	-0.22577	0.416417	0.870086	FALSE	None
AFAP1L2	4	-0.294246	0.062156	4	-0.0346636	0.0494672	0.274883	0.316108	0.825254	FALSE	None
AFAP1	4	0.103214	0.177228	4	-0.0882609	0.127224	-0.202507	0.487813	0.896001	FALSE	None
AFF1	4	-0.330504	0.144963	4	-0.510435	0.217232	-0.207873	0.425403	0.873391	FALSE	None
AFF2	4	0.309257	0.123482	4	0.353482	1.32139	-0.271952	0.378924	0.857149	FALSE	None
AFF3	4	0.198889	0.116815	4	-0.332877	0.117086	-0.549915	0.0468715	0.515207	FALSE	None
AFF4	4	0.294737	0.186323	4	0.819786	1.90016	-0.0393292	0.889233	0.984309	FALSE	None
AFG3L2	4	-2.60525	1.11138	4	-2.14239	0.464698	0.15146	0.584905	0.924409	FALSE	None
AFMID	4	0.0985455	0.09615	4	-0.00544259	0.141901	-0.144264	0.578361	0.922525	FALSE	None
AFM	4	0.112445	0.0607926	4	0.137826	0.212945	-0.0214343	0.937752	0.991866	FALSE	None
AFP	4	-0.0606506	0.0589607	4	-0.00510617	0.191459	0.0400231	0.880856	0.982117	FALSE	None
AFTPH	4	-0.28924	0.120157	4	-0.390665	0.636753	-0.170164	0.534563	0.908375	FALSE	None
AGAP1	4	0.817615	0.117475	4	0.96801	0.27731	-0.629563	0.0323567	0.448667	FALSE	None
AGAP2	4	-0.24151	0.256065	4	-0.0149017	0.0224857	0.219395	0.428716	0.873804	FALSE	None
AGAP3	4	0.0668409	0.463226	4	0.0636186	0.503013	-0.183713	0.482226	0.893731	FALSE	None
AGA	4	0.115562	0.254591	4	0.0899649	0.129637	-0.095427	0.736178	0.957369	FALSE	None
AGBL1	4	-0.0181811	0.530968	4	-0.127832	0.0955161	-0.146061	0.639877	0.942193	FALSE	None
AGBL2	4	-0.192434	0.0427591	4	0.0157592	0.12056	0.202654	0.43204	0.876165	FALSE	None
AGBL3	4	-0.146884	0.134673	4	0.233249	0.240558	0.326854	0.232963	0.776424	FALSE	None
AGBL4	4	-0.0160697	0.161577	4	0.0560945	0.0580115	0.0502356	0.850805	0.976746	FALSE	None
AGBL5	4	-0.0986363	0.340475	4	-0.145104	0.112438	-0.0596662	0.84235	0.97419	FALSE	None
AGER	4	0.533444	0.285623	4	-0.108726	0.429412	-0.726128	0.0463734	0.514531	FALSE	None
AGFG1	4	0.306011	0.0480337	4	0.346929	0.156413	-0.100355	0.695703	0.950651	FALSE	None
AGFG2	4	-0.378496	0.0365026	4	-0.634184	0.192001	-0.283734	0.311133	0.824639	FALSE	None
AGGF1	4	-0.486675	0.0337679	4	-0.134176	0.224673	0.340697	0.218153	0.765625	FALSE	None
AGK	4	-0.295262	0.425432	4	-0.339377	0.287102	-0.0858289	0.771393	0.965321	FALSE	None
AGL	4	0.0186343	0.264583	4	-0.171878	0.347085	-0.267535	0.307438	0.822903	FALSE	None
AGMAT	4	-0.252661	0.25518	4	-0.291495	0.109463	-0.0382003	0.896956	0.985835	FALSE	None
AGMO	4	-0.254359	0.316238	4	0.0905057	0.193092	0.296571	0.284343	0.810669	FALSE	None
AGO1	4	-0.597253	0.935411	4	-0.237612	1.686	0.165118	0.550661	0.912951	FALSE	None
AGO2	4	-0.440744	0.0278337	4	0.0236926	0.339887	0.448174	0.118843	0.666677	FALSE	None
AGO3	4	0.0273802	0.379757	4	0.181668	0.239688	0.00293912	0.991146	0.998079	FALSE	None
AGO4	4	0.125967	0.114612	4	0.76547	0.329685	0.370414	0.189033	0.741129	FALSE	None
AGPAT1	4	-0.226775	0.0232693	4	0.012617	0.345979	0.22416	0.42864	0.873804	FALSE	None
AGPAT2	4	0.0970963	0.539395	4	0.027456	1.16549	-0.383958	0.217618	0.765214	FALSE	None
AGPAT3	4	0.0554993	0.154246	4	0.510574	1.279	0.145829	0.606196	0.930864	FALSE	None
AGPAT4	4	0.194457	0.365766	4	0.0836899	0.848981	-0.40901	0.15995	0.716257	FALSE	None
AGPAT5	4	-2.01469	0.0392371	4	-1.22925	0.600053	0.539092	0.105284	0.651196	FALSE	None
AGPAT6	4	-0.481209	0.532274	4	-0.508798	0.449847	-0.0879212	0.739152	0.958469	FALSE	None
AGPAT9	4	-0.484036	1.04978	4	-0.0874262	0.26433	0.304181	0.2941	0.815309	FALSE	None
AGPS	4	-0.108055	0.318797	4	0.0904774	0.206675	0.125415	0.635011	0.940686	FALSE	None
AGR2	4	0.216574	0.156252	4	-0.0880683	0.119994	-0.357755	0.183713	0.736003	FALSE	None
AGR3	4	0.0123334	0.18207	4	0.398757	0.245647	0.300676	0.330891	0.835878	FALSE	None
AGRN	4	0.106894	0.166199	4	0.196687	0.0995363	0.0608317	0.838283	0.97296	FALSE	None
AGRP	4	-0.299231	0.146542	4	0.121067	0.243624	0.370739	0.165365	0.721881	FALSE	None
AGTPBP1	4	0.0637507	0.122902	4	-0.450305	0.110694	-0.51364	0.0683128	0.58008	FALSE	None
AGTR1	4	0.177284	0.0710798	4	0.401744	0.407559	0.0683953	0.805705	0.970419	FALSE	None
AGTR2	4	0.0972533	0.0520263	4	-0.284835	0.285702	-0.40035	0.143791	0.699405	FALSE	None
AGTRAP	4	-0.182057	0.713073	4	0.128139	0.209371	0.191762	0.489543	0.896126	FALSE	None
AGT	4	-0.703036	0.498583	4	-0.536359	0.994677	0.10295	0.705661	0.951073	FALSE	None
AGXT2	4	-0.141111	0.0686889	4	-0.46243	0.286996	-0.333696	0.238873	0.781459	FALSE	None
AGXT	4	-0.344256	0.582143	4	0.250098	0.527436	0.537738	0.147	0.705247	FALSE	None
AHCTF1	4	-1.67517	2.04189	4	-0.98957	3.14985	0.43361	0.186663	0.737485	FALSE	None
AHCYL1	4	-0.292737	0.276753	4	-0.631199	0.297645	-0.37287	0.214799	0.761364	FALSE	None
AHCYL2	4	-0.003776	0.145345	4	0.339791	0.429727	0.218217	0.420187	0.872462	FALSE	None
AHCY	4	-3.10254	1.74844	4	-2.21276	1.39775	0.59353	0.0364442	0.475915	FALSE	None
AHDC1	4	0.12783	0.141653	4	-0.372094	0.146034	-0.511368	0.0732919	0.593886	FALSE	None
AHI1	3	-0.943115	0.148396	3	-0.604118	0.220856	0.260309	0.397853	0.863658	FALSE	None
AHNAK2	NA	NA	NA	NA	NA	NA	NA	NA	NA	NA	None
AHNAK	4	0.243789	0.172687	4	0.0249405	0.135781	-0.299885	0.274207	0.805831	FALSE	None
AHRR	4	-0.0801696	0.0662831	4	0.128271	0.3822	0.156194	0.573818	0.920711	FALSE	None
AHR	4	0.0506232	0.200125	4	-0.356547	0.0412825	-0.416409	0.127613	0.678706	FALSE	None
AHSA1	4	0.204245	0.0825644	4	0.410396	0.275684	0.0365719	0.889242	0.984309	FALSE	None
AHSA2	4	-0.0623251	0.2941	4	-0.0779906	0.309604	-0.0720147	0.78909	0.967356	FALSE	None
AHSG	3	-0.380526	0.249743	3	-0.163376	0.0159928	0.208654	0.508126	0.901525	FALSE	None
AHSP	4	0.134494	0.257246	4	-0.349056	0.0972666	-0.504853	0.0752188	0.599804	FALSE	None
AICDA	4	-0.164142	0.181751	4	-0.458222	0.171275	-0.320853	0.222786	0.769036	FALSE	None
AIDA	4	-0.179735	0.325442	4	-0.850528	0.413207	-0.733446	0.0141069	0.311274	TRUE	Negative
AIF1L	4	-0.198546	0.258683	4	-0.241548	0.169051	-0.0509021	0.865521	0.980053	FALSE	None
AIF1	4	-0.0153375	0.13233	4	0.0724237	0.27022	0.0345922	0.900567	0.987034	FALSE	None
AIFM1	4	-2.30991	1.77092	4	-0.858336	1.08938	1.24268	0.00425833	0.167698	TRUE	Positive
AIFM2	4	-0.0710537	0.208514	4	0.0490176	0.578	0.0968062	0.781068	0.966335	FALSE	None
AIFM3	4	-0.178609	0.0410439	4	0.465435	1.0402	0.527596	0.13107	0.683068	FALSE	None
AIG1	4	0.228805	0.0827157	4	0.208234	0.207745	-0.129286	0.622413	0.934907	FALSE	None
AIM1L	4	0.0586944	0.329793	4	-0.143472	0.24334	-0.30104	0.254177	0.791573	FALSE	None
AIM1	4	0.00331329	0.137324	4	0.0509665	0.391391	-0.0500422	0.849448	0.976074	FALSE	None
AIM2	4	-0.303544	0.514512	4	0.0380331	0.881238	0.192981	0.509186	0.902002	FALSE	None
AIMP1	4	-0.179231	0.45772	4	0.471557	0.352791	0.584154	0.11902	0.667425	FALSE	None
AIMP2	4	-0.134112	0.181607	4	-0.146015	0.270575	-0.0182417	0.952497	0.992458	FALSE	None
AIPL1	4	-0.147422	0.0830826	4	-0.0421531	0.64905	0.0092835	0.97216	0.995658	FALSE	None
AIP	4	0.16747	0.215092	4	0.609929	0.614143	0.176663	0.580283	0.922778	FALSE	None
AIRE	4	0.331998	0.126017	4	0.263672	0.282119	-0.247048	0.358486	0.848717	FALSE	None
AJAP1	4	0.115862	0.283326	4	0.195367	0.0780137	0.00375349	0.98972	0.997865	FALSE	None
AJUBA	4	0.0522016	0.451771	4	-0.0233902	0.120973	-0.136333	0.658087	0.944316	FALSE	None
AK1	4	-0.0959063	0.0773987	4	-0.0317846	0.460165	0.0569238	0.859241	0.978652	FALSE	None
AK2	4	-3.00716	0.191385	4	-2.62257	0.0940426	0.0205532	0.936572	0.991866	FALSE	None
AK3	4	-0.230395	0.490677	4	-0.0638714	0.456597	0.0543801	0.830407	0.97296	FALSE	None
AK4	4	-0.493186	0.976154	4	-0.46151	0.828442	-0.119672	0.691902	0.950651	FALSE	None
AK5	4	0.0306208	0.0492264	4	-0.0669839	0.121321	-0.101032	0.709464	0.951317	FALSE	None
AK7	4	-0.0921005	0.436929	4	-0.143008	1.46771	-0.208182	0.517979	0.904031	FALSE	None
AK8	4	-0.0233302	0.539208	4	-0.602803	0.270762	-0.626786	0.0412079	0.4927	FALSE	None
AK9	4	0.402204	0.134682	4	0.148153	0.148032	-0.339598	0.262059	0.796139	FALSE	None
AKAP10	4	0.0318335	0.160885	4	0.0187287	0.0969571	-0.028861	0.918265	0.989457	FALSE	None
AKAP11	4	-0.111069	0.0152897	4	0.939009	0.922363	0.745918	0.0135991	0.306506	TRUE	Positive
AKAP12	4	-0.10802	0.13255	4	-0.348238	0.088749	-0.233465	0.40894	0.866542	FALSE	None
AKAP13	4	-0.995868	0.391293	4	-0.385443	0.677463	0.530986	0.109505	0.656699	FALSE	None
AKAP14	4	-0.0162143	0.042882	4	0.0370246	0.0947813	0.0464431	0.860219	0.978905	FALSE	None
AKAP1	4	-0.427855	0.28252	4	-0.117539	0.256226	0.284412	0.321234	0.827901	FALSE	None
AKAP2	NA	NA	NA	NA	NA	NA	NA	NA	NA	NA	None
AKAP3	3	-0.0920838	0.279162	3	-0.217729	0.136854	-0.128029	0.70948	0.951317	FALSE	None
AKAP4	4	0.247344	0.0331112	4	0.0867502	0.253257	-0.23487	0.378718	0.857149	FALSE	None
AKAP5	4	-0.146618	0.00504138	4	0.276191	0.230107	0.392243	0.156772	0.714299	FALSE	None
AKAP6	4	-0.383761	0.369702	4	-0.145805	0.287742	0.166518	0.543849	0.910874	FALSE	None
AKAP7	4	0.212927	0.312146	4	0.120626	0.597722	-0.308321	0.262238	0.796139	FALSE	None
AKAP8L	4	-0.873245	0.204479	4	-0.00664947	0.349754	0.837148	0.0134068	0.304233	TRUE	Positive
AKAP8	4	-0.323879	0.55452	4	-0.501075	0.489834	-0.235821	0.391973	0.861828	FALSE	None
AKAP9	4	0.27324	0.138443	4	0.313626	0.099016	-0.0899419	0.733669	0.956372	FALSE	None
AKIP1	3	-0.0195729	0.589221	3	0.0944137	0.00506549	0.0785256	0.826382	0.97285	FALSE	None
AKIRIN1	4	-0.494864	0.0823655	4	-1.26376	0.304397	-0.868355	0.0132406	0.303205	TRUE	Negative
AKIRIN2	4	-1.20155	0.0757146	4	-1.08383	0.632929	-0.040284	0.896456	0.985835	FALSE	None
AKNAD1	4	-0.269451	0.075792	4	-0.0892402	0.544702	0.120608	0.658996	0.944403	FALSE	None
AKNA	4	0.121314	0.0553446	4	-0.230533	0.317356	-0.389852	0.160517	0.716257	FALSE	None
AKR1A1	4	-0.328521	0.172425	4	0.112644	0.428168	0.368706	0.19365	0.741947	FALSE	None
AKR1B10	4	-0.500672	1.3504	4	0.543218	0.397728	0.871294	0.0256907	0.405892	FALSE	None
AKR1B15	NA	NA	NA	NA	NA	NA	NA	NA	NA	NA	None
AKR1B1	4	-0.26235	0.336287	4	-0.176629	0.105249	0.0654247	0.818219	0.97169	FALSE	None
AKR1C2	NA	NA	NA	NA	NA	NA	NA	NA	NA	NA	None
AKR1C3	4	0.40329	0.423854	4	0.332992	1.42498	-0.60051	0.0416307	0.494724	FALSE	None
AKR1C4	NA	NA	NA	NA	NA	NA	NA	NA	NA	NA	None
AKR1D1	4	0.0345639	0.425621	4	0.0466988	0.0108511	-0.0348744	0.904397	0.987739	FALSE	None
AKR1E2	4	0.134183	0.684619	4	0.305844	0.161147	0.0247671	0.942303	0.992145	FALSE	None
AKR7A2	4	-0.334638	0.768447	4	-0.288416	0.611596	-0.125768	0.651796	0.94257	FALSE	None
AKR7A3	4	-0.638248	0.336978	4	-0.351356	0.766602	0.241672	0.438454	0.878364	FALSE	None
AKT1S1	4	-0.479837	0.806132	4	0.166513	1.70245	0.407645	0.203162	0.752023	FALSE	None
AKT1	4	-0.732927	0.0873151	4	-1.25901	0.0930217	-0.651103	0.0192431	0.365634	TRUE	Negative
AKT2	4	-0.793216	0.170479	4	-1.38612	1.55516	-0.761469	0.0463588	0.514531	FALSE	None
AKT3	4	0.30582	0.177446	4	-0.182603	0.617204	-0.639926	0.0250136	0.40571	FALSE	None
AKTIP	4	-0.595825	0.147892	4	-0.113213	0.27836	0.456433	0.114376	0.661883	FALSE	None
ALAD	4	-0.286272	0.178549	4	-0.00534213	0.12466	0.254919	0.340421	0.842428	FALSE	None
ALAS1	4	-0.227755	0.309413	4	-0.101464	0.951027	-0.0179729	0.951015	0.992159	FALSE	None
ALAS2	4	0.143989	0.176587	4	0.0984252	0.411648	-0.149509	0.584756	0.924409	FALSE	None
ALB	4	-0.0139428	0.0888795	4	0.296542	0.0202051	0.284559	0.300025	0.819631	FALSE	None
ALCAM	4	-0.584425	0.462211	4	-0.299276	0.0299982	0.261698	0.387143	0.860045	FALSE	None
ALDH16A1	4	-0.216659	0.588006	4	-0.355882	0.375907	-0.191778	0.571661	0.919501	FALSE	None
ALDH18A1	4	-0.513788	0.324996	4	0.102178	0.0689339	0.611809	0.0561033	0.548247	FALSE	None
ALDH1A1	4	-0.35013	0.445337	4	0.473874	1.00459	0.640742	0.0332812	0.456568	FALSE	None
ALDH1A2	4	0.114502	0.319928	4	0.0227365	0.0477873	-0.142923	0.614122	0.932082	FALSE	None
ALDH1A3	4	0.0922221	0.102975	4	-0.249215	0.39135	-0.36513	0.225549	0.770879	FALSE	None
ALDH1B1	4	-0.595166	0.409692	4	-0.421947	0.927726	0.0927557	0.794134	0.967945	FALSE	None
ALDH1L1	4	-0.708536	0.494052	4	-1.01427	0.301891	-0.399652	0.140643	0.696588	FALSE	None
ALDH1L2	4	-0.509597	0.490195	4	-0.43351	0.0538237	0.0490476	0.872972	0.980908	FALSE	None
ALDH2	4	-0.116977	0.228601	4	-0.240891	0.214787	-0.152288	0.575223	0.921053	FALSE	None
ALDH3A1	3	0.0706714	0.357949	3	-0.0916809	0.495179	-0.217712	0.563071	0.91736	FALSE	None
ALDH3A2	4	0.0417114	0.533793	4	0.545456	0.0873753	0.279635	0.371596	0.85227	FALSE	None
ALDH3B2	3	-0.52931	0.331629	3	0.0122589	0.171549	0.536753	0.140182	0.696026	FALSE	None
ALDH4A1	4	0.396135	0.0741849	4	-0.031326	0.367108	-0.545944	0.0490241	0.523441	FALSE	None
ALDH5A1	4	-0.165438	0.229091	4	0.0637046	0.367233	0.14279	0.582628	0.924087	FALSE	None
ALDH6A1	4	-0.346601	0.517573	4	-0.354875	0.1858	-0.0594439	0.831034	0.97296	FALSE	None
ALDH7A1	3	0.147835	0.134802	3	-0.627955	0.361927	-0.81547	0.0175428	0.349345	TRUE	Negative
ALDH8A1	4	0.0881132	0.160192	4	0.0183408	0.514692	-0.162679	0.559031	0.915348	FALSE	None
ALDH9A1	4	0.391368	0.642083	4	0.510576	1.15904	-0.328579	0.379174	0.857149	FALSE	None
ALDOA	4	-3.23533	0.447293	4	-2.78408	0.266827	0.0911787	0.72206	0.953282	FALSE	None
ALDOB	4	-0.0224598	0.450634	4	-0.291284	0.454167	-0.333731	0.211772	0.757331	FALSE	None
ALDOC	4	0.348649	0.0770638	4	-0.456569	0.197173	-0.831688	0.00502477	0.184905	TRUE	Negative
ALG10B	NA	NA	NA	NA	NA	NA	NA	NA	NA	NA	None
ALG11	4	-2.18868	1.15916	4	-2.25407	1.67801	-0.337132	0.223641	0.769749	FALSE	None
ALG12	4	-0.117319	0.500155	4	0.661831	0.452213	0.485852	0.093755	0.634559	FALSE	None
ALG13	4	-2.42552	3.91466	4	-2.20826	3.03795	-0.0540663	0.838335	0.97296	FALSE	None
ALG14	4	-1.93881	1.80916	4	-1.59252	0.702872	0.115755	0.70139	0.950651	FALSE	None
ALG1	4	-3.45596	1.41878	4	-3.61601	0.177873	-0.502485	0.123864	0.673814	FALSE	None
ALG2	4	-3.49728	0.327808	4	-3.11229	0.216622	0.0224406	0.930275	0.991578	FALSE	None
ALG3	4	0.102708	0.401976	4	0.768743	0.445815	0.314919	0.279505	0.80785	FALSE	None
ALG5	3	-2.03796	1.52353	3	-1.01987	0.0751265	0.800618	0.0358994	0.472667	FALSE	None
ALG6	4	-0.809435	1.46221	4	-0.446363	0.267696	0.191671	0.532687	0.907747	FALSE	None
ALG8	4	-1.14142	1.10007	4	-0.238823	0.136133	0.807387	0.0286808	0.422608	FALSE	None
ALG9	4	-0.191185	0.168797	4	0.589467	0.0460233	0.730822	0.0213033	0.380297	TRUE	Positive
ALKBH1	4	-0.637601	0.116988	4	-0.173472	0.286323	0.442056	0.1197	0.667853	FALSE	None
ALKBH2	4	0.0511659	0.292753	4	-0.0795326	0.335263	-0.240613	0.380304	0.857179	FALSE	None
ALKBH3	4	0.148077	0.379541	4	0.443777	0.547722	0.167946	0.65358	0.942738	FALSE	None
ALKBH4	4	-0.278809	0.134683	4	-0.025908	0.0438533	0.245663	0.345634	0.843776	FALSE	None
ALKBH5	4	-0.651743	0.0322624	4	-0.861234	0.11451	-0.28264	0.282135	0.809049	FALSE	None
ALKBH6	4	-0.204288	0.206188	4	0.246658	0.0190452	0.426598	0.121305	0.670128	FALSE	None
ALKBH7	4	0.0989219	0.165516	4	0.14077	0.438632	-0.0733495	0.798629	0.968502	FALSE	None
ALKBH8	4	-0.954822	2.16961	4	-1.43823	2.42558	-0.792599	0.00633149	0.210366	TRUE	Negative
ALK	4	-0.795079	3.21828	4	-0.920082	2.28182	-0.209764	0.449368	0.881769	FALSE	None
ALLC	4	0.125924	0.15944	4	0.194347	0.515965	-0.0168914	0.957267	0.993124	FALSE	None
ALMS1	4	-0.711688	0.573803	4	-0.451246	0.261252	0.203782	0.44275	0.879726	FALSE	None
ALOX12B	4	-0.104676	0.0529376	4	-0.515629	0.038295	-0.410319	0.126101	0.67667	FALSE	None
ALOX12	4	0.268057	0.34914	4	0.224168	0.545623	-0.310535	0.240031	0.782285	FALSE	None
ALOX15B	3	-0.321917	0.105804	3	-0.346785	0.511403	-0.0687878	0.82758	0.97296	FALSE	None
ALOX15	4	-0.229526	0.884496	4	-0.185211	1.14186	-0.0735683	0.799804	0.96896	FALSE	None
ALOX5AP	4	-0.145713	0.410009	4	0.247362	0.367527	0.267424	0.333322	0.837548	FALSE	None
ALOX5	4	-0.0487826	0.0549076	4	-0.259158	0.0152856	-0.195631	0.45883	0.884603	FALSE	None
ALOXE3	4	0.0101371	0.0395785	4	-0.38644	0.391076	-0.417781	0.139015	0.696026	FALSE	None
ALPI	4	0.213214	0.121779	4	0.354785	0.691224	-0.0573622	0.842944	0.974296	FALSE	None
ALPK1	4	0.0729664	0.109884	4	-0.450682	0.61578	-0.598726	0.0405735	0.489112	FALSE	None
ALPK2	4	0.0479806	0.096015	4	0.301638	0.11534	0.180093	0.479124	0.892646	FALSE	None
ALPK3	4	-0.871162	0.077162	4	-0.411082	0.825261	0.401296	0.256363	0.794418	FALSE	None
ALPL	4	-0.075667	0.0486704	4	0.0986323	0.0447595	0.168541	0.514821	0.903055	FALSE	None
ALPPL2	NA	NA	NA	NA	NA	NA	NA	NA	NA	NA	None
ALPP	NA	NA	NA	NA	NA	NA	NA	NA	NA	NA	None
ALS2CL	4	-0.479372	0.90727	4	-0.130092	0.402242	0.233789	0.388488	0.860441	FALSE	None
ALS2CR11	4	0.433333	0.122469	4	0.179013	0.356059	-0.41545	0.154744	0.712804	FALSE	None
ALS2CR12	4	-0.42974	2.13817	4	-0.145147	1.39326	0.0876945	0.743846	0.960508	FALSE	None
ALS2	4	-0.285904	0.141148	4	0.43594	0.0371306	0.708054	0.0202646	0.37192	TRUE	Positive
ALX1	4	0.429175	0.565644	4	0.338043	0.790362	-0.480183	0.192704	0.741129	FALSE	None
ALX3	4	-0.833746	1.45562	4	-0.11945	0.617243	0.457312	0.137164	0.694254	FALSE	None
ALX4	4	-0.655861	0.901608	4	-0.710276	1.94943	-0.180209	0.606311	0.930878	FALSE	None
ALYREF	4	-2.46875	0.377266	4	-2.29713	0.480682	-0.15555	0.552771	0.913242	FALSE	None
AMACR	4	0.0905139	0.179502	4	0.0651364	0.0549969	-0.0650129	0.803921	0.970171	FALSE	None
AMBN	4	-0.411493	0.274087	4	-0.333445	0.493004	0.0221039	0.935051	0.991866	FALSE	None
AMBP	4	-0.704682	0.48579	4	-0.614722	1.62812	-0.0189053	0.954073	0.993095	FALSE	None
AMBRA1	4	0.345614	0.159322	4	0.264691	0.0527008	-0.187997	0.507869	0.901525	FALSE	None
AMD1	4	-1.47835	0.901008	4	0.0544738	1.34821	1.41961	0.00015913	0.0205512	TRUE	Positive
AMDHD1	4	0.0589877	0.0542294	4	0.192619	0.0550096	0.112791	0.674512	0.94735	FALSE	None
AMDHD2	4	-1.0727	0.373579	4	-0.201184	0.114616	0.813093	0.00571434	0.199774	TRUE	Positive
AMELX	4	0.613025	0.0725634	4	0.349143	0.309035	-0.569059	0.0390221	0.487993	FALSE	None
AMELY	4	0.340037	0.036047	4	0.496378	0.202225	-0.0627284	0.803518	0.970038	FALSE	None
AMER1	4	0.0194815	0.104189	4	0.152125	0.0390747	0.104144	0.687213	0.950205	FALSE	None
AMER2	4	-0.396764	0.186447	4	0.631662	0.921927	0.875159	0.0113548	0.282089	TRUE	Positive
AMER3	4	-0.691201	0.204985	4	-0.764966	0.16498	-0.143507	0.614671	0.932082	FALSE	None
AMFR	4	0.00258032	0.299249	4	0.0702877	0.166846	0.0493688	0.877649	0.981564	FALSE	None
AMHR2	4	-0.00342403	0.202556	4	0.108421	0.91494	0.0660146	0.865002	0.980053	FALSE	None
AMH	4	-0.215942	0.0444872	4	-0.456418	0.0294085	-0.241288	0.350058	0.846338	FALSE	None
AMICA1	4	-0.244619	0.168971	4	0.124266	0.0726119	0.354206	0.19407	0.742667	FALSE	None
AMIGO1	4	-0.0862578	0.14646	4	0.219329	0.191042	0.222414	0.395157	0.863207	FALSE	None
AMIGO2	4	-0.327145	0.530537	4	-0.190255	1.02946	0.0460618	0.868323	0.980138	FALSE	None
AMMECR1L	4	-0.373362	0.186088	4	-0.675562	0.0711259	-0.333901	0.230381	0.774316	FALSE	None
AMMECR1	4	0.296274	0.0379222	4	0.0695591	0.241464	-0.284446	0.31696	0.825254	FALSE	None
AMN1	4	-0.43949	0.0840626	4	-0.304968	0.357244	0.114456	0.693055	0.950651	FALSE	None
AMN	4	-0.099165	0.133414	4	-0.105773	0.77133	-0.116706	0.668142	0.945618	FALSE	None
AMOTL1	4	-0.698176	1.8323	4	-0.235913	1.47806	0.196554	0.471196	0.889461	FALSE	None
AMOTL2	4	0.307701	0.0327391	4	0.414927	0.115269	-0.0476407	0.85175	0.977004	FALSE	None
AMOT	4	0.0596715	0.95204	4	0.791986	0.50561	0.234561	0.485368	0.895702	FALSE	None
AMPD1	4	-0.276744	0.162637	4	0.463544	0.55959	0.656625	0.0537991	0.543328	FALSE	None
AMPD2	4	-0.180189	0.412163	4	0.0161076	0.268884	0.18291	0.591634	0.926509	FALSE	None
AMPD3	4	-0.160245	0.0836834	4	0.027082	0.0103083	0.191229	0.462056	0.885221	FALSE	None
AMPH	4	-0.037449	0.150819	4	0.0519862	0.169819	0.0685292	0.810247	0.971216	FALSE	None
[truncated: 17,446 more rows]
