# Supplementary material for: The PRC2.1 subcomplex opposes G1 progression through regulation of CCND1 and CCND2
Source: eLife. 2025 Feb 4;13:RP97577. doi: 10.7554/eLife.97577 (PMC11793871; doi:10.7554/eLife.97577)
Supplement: Supplementary file 2. [file elife-97577-supp2.xlsx]

## Sheet: Camptothecin_Sensitive
1nM Camptothecin Chemogenomics Screen Sensitive Genes
Gene	Differential	pValue	-log(pValue)	FDR	-log(FDR)	Significance	Effect
EME1	-2.42909	1.42618e-07	6.84583	0.000511791	3.29091	TRUE	Negative
TSC1	-2.28236	3.23356e-07	6.49032	0.000709928	3.14879	TRUE	Negative
STRA13	-2.17956	2.5873e-07	6.58715	0.000649191	3.18763	TRUE	Negative
FANCA	-2.10898	3.86266e-08	7.41311	0.000226146	3.64561	TRUE	Negative
TDP2	-2.09942	1.46172e-05	4.83514	0.00755109	2.12199	TRUE	Negative
PARP1	-1.84146	1.54235e-06	5.81182	0.00169312	2.77131	TRUE	Negative
STK11	-1.82492	2.50218e-05	4.60168	0.00998823	2.00051	TRUE	Negative
CSK	-1.77899	4.76434e-06	5.322	0.00380368	2.4198	TRUE	Negative
MUS81	-1.75974	4.19993e-06	5.37676	0.00355486	2.44918	TRUE	Negative
OTUD5	-1.75028	6.03516e-06	5.21931	0.00424006	2.37263	TRUE	Negative
DEPDC5	-1.74792	9.33404e-07	6.02993	0.0012611	2.89925	TRUE	Negative
ZSWIM7	-1.7063	4.25029e-06	5.37158	0.00355486	2.44918	TRUE	Negative
TSC2	-1.68534	2.29599e-05	4.63903	0.00960162	2.01766	TRUE	Negative
POLE4	-1.62086	1.08112e-06	5.96613	0.00135634	2.86763	TRUE	Negative
PSMC3IP	-1.60632	0.000254539	3.59425	0.0438305	1.35822	TRUE	Negative
XRCC1	-1.57616	9.25832e-06	5.03347	0.00556103	2.25484	TRUE	Negative
NPRL2	-1.52391	3.10419e-06	5.50805	0.00286958	2.54218	TRUE	Negative
ELOF1	-1.51221	7.69985e-05	4.11352	0.02254	1.64705	TRUE	Negative
RECQL5	-1.50135	2.75735e-05	4.55951	0.0100896	1.99613	TRUE	Negative
HELQ	-1.46883	5.38063e-06	5.26917	0.00393772	2.40476	TRUE	Negative
MGEA5	-1.44857	1.2896e-05	4.88955	0.00686379	2.16344	TRUE	Negative
MND1	-1.43413	8.9736e-05	4.04703	0.0238002	1.62342	TRUE	Negative
ESCO1	-1.40784	1.19499e-05	4.92264	0.00655899	2.18316	TRUE	Negative
KAT7	-1.38835	8.8653e-06	5.05231	0.00556103	2.25484	TRUE	Negative
TMED2	-1.38433	1.70831e-05	4.76743	0.0082131	2.08549	TRUE	Negative
RAD54L	-1.38036	4.00631e-05	4.39726	0.0140733	1.8516	TRUE	Negative
RAD18	-1.37476	0.000137857	3.86057	0.0288437	1.53995	TRUE	Negative
ESCO2	-1.36731	0.000343619	3.46392	0.050717	1.29485	TRUE	Negative
TRA2A	-1.35877	0.000112138	3.95025	0.0252511	1.59772	TRUE	Negative
GATAD1	-1.34592	1.86111e-05	4.73023	0.00840701	2.07536	TRUE	Negative
FANCI	-1.32601	7.1286e-05	4.147	0.0219661	1.65825	TRUE	Negative
THOC6	-1.28906	9.69113e-05	4.01363	0.0238002	1.62342	TRUE	Negative
UIMC1	-1.28674	0.000181298	3.74161	0.0353814	1.45123	TRUE	Negative
NUDCD1	-1.27611	0.000109573	3.9603	0.0249939	1.60217	TRUE	Negative
SZT2	-1.26817	7.30167e-05	4.13658	0.0221115	1.65538	TRUE	Negative
DHX35	-1.26257	9.45505e-05	4.02434	0.0238002	1.62342	TRUE	Negative
MARK3	-1.25082	8.1776e-05	4.08737	0.0235461	1.62808	TRUE	Negative
BRE	-1.25053	0.000109209	3.96174	0.0249939	1.60217	TRUE	Negative
FANCB	-1.25021	0.000213703	3.67019	0.0390987	1.40784	TRUE	Negative
MCM9	-1.24348	0.000991598	3.00366	0.103056	0.986927	TRUE	Negative
KIAA1524	-1.23433	3.75675e-05	4.42519	0.013466	1.87076	TRUE	Negative
UBE2A	-1.23175	0.00027874	3.5548	0.0463161	1.33427	TRUE	Negative
AUNIP	-1.22934	0.000317912	3.49769	0.0481362	1.31753	TRUE	Negative
BRCC3	-1.21925	0.000693429	3.159	0.0822986	1.08461	TRUE	Negative
TAOK1	-1.21412	8.37204e-05	4.07717	0.0237172	1.62494	TRUE	Negative
RAD51B	-1.20552	0.000312311	3.50541	0.0476994	1.32149	TRUE	Negative
GEMIN2	-1.18099	0.000368219	3.43389	0.0525805	1.27918	TRUE	Negative
TEN1	-1.17013	0.00016548	3.78126	0.0330282	1.48111	TRUE	Negative
ANKRD32	-1.17003	0.000120767	3.91805	0.0258677	1.58724	TRUE	Negative
IWS1	-1.13522	0.00183402	2.7366	0.146818	0.83322	TRUE	Negative
C11orf30	-1.13072	0.000324137	3.48927	0.0486584	1.31284	TRUE	Negative
MIB1	-1.1184	0.000118954	3.92462	0.0257939	1.58848	TRUE	Negative
RAD51AP1	-1.09877	0.00361964	2.44133	0.211214	0.675278	TRUE	Negative
PIK3R2	-1.09765	0.00146128	2.83527	0.130949	0.882898	TRUE	Negative
SFR1	-1.0949	0.000513138	3.28977	0.0667611	1.17548	TRUE	Negative
PTEN	-1.08388	0.000161868	3.79084	0.0326787	1.48574	TRUE	Negative
WAC	-1.07825	0.000309326	3.50958	0.0476994	1.32149	TRUE	Negative
CSTF2	-1.07119	0.000363919	3.439	0.0525805	1.27918	TRUE	Negative
POLE3	-1.06993	0.000238472	3.62256	0.0422149	1.37453	TRUE	Negative
GPS2	-1.06702	0.000693475	3.15897	0.0822986	1.08461	TRUE	Negative
AGFG1	-1.06283	0.000207127	3.68376	0.0390987	1.40784	TRUE	Negative
TOE1	-1.06074	0.000422917	3.37374	0.0580322	1.23633	TRUE	Negative
C16orf72	-1.05269	0.00304163	2.51689	0.190797	0.719428	TRUE	Negative
GIGYF2	-1.04984	0.000460133	3.33712	0.0616929	1.20976	TRUE	Negative
HSP90AB1	-1.04937	0.000646668	3.18932	0.0783316	1.10606	TRUE	Negative
PHF23	-1.04701	0.000642608	3.19205	0.0783316	1.10606	TRUE	Negative
INPPL1	-1.04489	0.000720384	3.14244	0.0843522	1.0739	TRUE	Negative
C12orf66	-1.03262	0.0035085	2.45488	0.208187	0.681546	TRUE	Negative
FANCC	-1.02538	0.00044131	3.35526	0.0596244	1.22458	TRUE	Negative
MAP4K4	-1.0212	0.000481837	3.3171	0.0636314	1.19633	TRUE	Negative
PAM	-1.01904	0.0019564	2.70854	0.149771	0.824572	TRUE	Negative
PDS5A	-1.01657	0.00235636	2.62776	0.165019	0.782465	TRUE	Negative
TBL1XR1	-1.0102	0.00359475	2.44433	0.211164	0.67538	TRUE	Negative
IVNS1ABP	-1.00742	0.00175675	2.75529	0.143684	0.842592	TRUE	Negative
UBE2T	-1.00704	0.000845333	3.07297	0.0937005	1.02826	TRUE	Negative
INHA	-0.999402	0.000692525	3.15956	0.0822986	1.08461	TRUE	Negative
MSL2	-0.996032	0.0007118	3.14764	0.0839064	1.0762	TRUE	Negative
MEIS1	-0.994893	0.000501935	3.29935	0.0657909	1.18183	TRUE	Negative
COCH	-0.993388	0.000832078	3.07984	0.0930867	1.03111	TRUE	Negative
C17orf70	-0.993155	0.00108169	2.9659	0.111104	0.954269	TRUE	Negative
MARK2	-0.99092	0.00406773	2.39065	0.222572	0.652529	TRUE	Negative
MCM8	-0.990194	0.00132402	2.8781	0.125469	0.901463	TRUE	Negative
PEX10	-0.985998	0.000587747	3.23081	0.0737371	1.13231	TRUE	Negative
CUL3	-0.981699	0.00399923	2.39802	0.220524	0.656545	TRUE	Negative
INPP4A	-0.979119	0.00133481	2.87458	0.125469	0.901463	TRUE	Negative
FAM193A	-0.968642	0.00095255	3.02111	0.0995869	1.0018	TRUE	Negative
CYB5R4	-0.953899	0.0117541	1.92981	0.350008	0.455922	TRUE	Negative
C1QL4	-0.953141	0.00254728	2.59392	0.170867	0.767343	TRUE	Negative
PHF12	-0.952648	0.00154499	2.81107	0.136363	0.865304	TRUE	Negative
DRAM2	-0.952303	0.00101466	2.99368	0.104833	0.979504	TRUE	Negative
CD163	-0.949766	0.00328493	2.48347	0.20096	0.69689	TRUE	Negative
FANCE	-0.947244	0.00379225	2.4211	0.215418	0.666719	TRUE	Negative
TXNDC17	-0.946388	0.00251719	2.59908	0.170867	0.767343	TRUE	Negative
C7orf26	-0.941115	0.000748025	3.12608	0.0864362	1.0633	TRUE	Negative
VPS45	-0.937276	0.00162216	2.78991	0.139522	0.855358	TRUE	Negative
SMARCAL1	-0.931826	0.00195925	2.70791	0.149771	0.824572	TRUE	Negative
AKAP10	-0.923387	0.000915762	3.03822	0.0978705	1.00935	TRUE	Negative
SAFB	-0.914509	0.00164433	2.78401	0.139522	0.855358	TRUE	Negative
C2	-0.906319	0.00185709	2.73117	0.147592	0.830936	TRUE	Negative
NF2	-0.904035	0.00699387	2.15528	0.289036	0.539048	TRUE	Negative
FUS	-0.900992	0.00374778	2.42623	0.215418	0.666719	TRUE	Negative
BRCA1	-0.89602	0.00226546	2.64484	0.162628	0.788805	TRUE	Negative
KCTD9	-0.893329	0.00434699	2.36181	0.230222	0.637853	TRUE	Negative
HSF1	-0.892713	0.00291886	2.53479	0.187106	0.727913	TRUE	Negative
PPP6R1	-0.892124	0.00929842	2.03159	0.326979	0.485481	TRUE	Negative
CNNM3	-0.889472	0.00811765	2.09057	0.308076	0.511342	TRUE	Negative
BRD1	-0.886145	0.00248722	2.60429	0.170867	0.767343	TRUE	Negative
MED25	-0.884234	0.00298532	2.52501	0.189979	0.721294	TRUE	Negative
DTX2	-0.883444	0.00116216	2.93474	0.116641	0.93315	TRUE	Negative
ACPP	-0.88339	0.0013924	2.85623	0.127431	0.894727	TRUE	Negative
TMEM200B	-0.873756	0.00556039	2.25489	0.257007	0.590055	TRUE	Negative
VSX2	-0.871703	0.00189579	2.72221	0.149101	0.82652	TRUE	Negative
ITFG2	-0.867063	0.00165602	2.78093	0.139535	0.855318	TRUE	Negative
ANO2	-0.864529	0.00613457	2.21222	0.271404	0.566383	TRUE	Negative
BAZ1B	-0.864478	0.00141222	2.8501	0.127857	0.893277	TRUE	Negative
DFFA	-0.863421	0.00205473	2.68725	0.153106	0.815007	TRUE	Negative
TMEM169	-0.863148	0.00148723	2.82762	0.132597	0.877466	TRUE	Negative
MNT	-0.860172	0.00191003	2.71896	0.149101	0.82652	TRUE	Negative
FAM175A	-0.857309	0.00164017	2.78511	0.139522	0.855358	TRUE	Negative
STK17B	-0.856675	0.00348152	2.45823	0.20758	0.682816	TRUE	Negative
CMTM1	-0.854404	0.0084087	2.07527	0.313568	0.503668	TRUE	Negative
TEX33	-0.854041	0.00346377	2.46045	0.20758	0.682816	TRUE	Negative
GRHL2	-0.850155	0.00489871	2.30992	0.241865	0.616427	TRUE	Negative
UBR5	-0.848575	0.00283808	2.54697	0.183265	0.73692	TRUE	Negative
WDR83	-0.848279	0.0157644	1.80232	0.376904	0.423769	TRUE	Negative
WDR5B	-0.84537	0.00198664	2.70188	0.150228	0.823248	TRUE	Negative
FANCL	-0.844769	0.0165768	1.7805	0.384109	0.415545	TRUE	Negative
SAGE1	-0.844373	0.00268052	2.57178	0.177328	0.751223	TRUE	Negative
SCLY	-0.844036	0.00640897	2.19321	0.278388	0.555349	TRUE	Negative
FANCD2	-0.843057	0.00495738	2.30475	0.241865	0.616427	TRUE	Negative
ANKRD11	-0.840573	0.0100523	1.99773	0.331656	0.479312	TRUE	Negative
FAM57B	-0.835964	0.00788174	2.10338	0.305954	0.514345	TRUE	Negative
PCDH12	-0.833924	0.00358062	2.44604	0.21104	0.675635	TRUE	Negative
CABIN1	-0.830714	0.0036319	2.43987	0.211228	0.675249	TRUE	Negative
VWA7	-0.826806	0.0109228	1.96167	0.344432	0.462897	TRUE	Negative
RBM12	-0.823912	0.00287032	2.54207	0.184668	0.733609	TRUE	Negative
HIST1H3F	-0.821653	0.00412297	2.38479	0.224894	0.648022	TRUE	Negative
TCOF1	-0.821599	0.00394409	2.40405	0.219222	0.659117	TRUE	Negative
NASP	-0.818332	0.00987291	2.00555	0.329047	0.482742	TRUE	Negative
FA2H	-0.818317	0.0044439	2.35224	0.23161	0.635242	TRUE	Negative
SRSF4	-0.818226	0.00876987	2.05701	0.319061	0.496127	TRUE	Negative
RCE1	-0.817812	0.00273461	2.5631	0.17989	0.744992	TRUE	Negative
LARP7	-0.815175	0.00507261	2.29477	0.24612	0.608853	TRUE	Negative
SUMO4	-0.815044	0.0103405	1.98546	0.334612	0.475458	TRUE	Negative
LRRC10	-0.806885	0.00422372	2.37431	0.227562	0.642899	TRUE	Negative
ARL14EP	-0.806048	0.00618514	2.20865	0.27227	0.565	TRUE	Negative
TRA2B	-0.802102	0.0106251	1.97367	0.339948	0.468588	TRUE	Negative
PCSK4	-0.801893	0.0146514	1.83412	0.367756	0.43444	TRUE	Negative
EXO1	-0.800158	0.00772217	2.11226	0.303428	0.517945	TRUE	Negative
RFK	-0.792591	0.00449716	2.34706	0.232731	0.633146	TRUE	Negative
FANCF	-0.791478	0.0175163	1.75656	0.388664	0.410426	TRUE	Negative
MYH6	-0.790647	0.00543586	2.26473	0.253924	0.595296	TRUE	Negative
EFCAB6	-0.790022	0.00470692	2.32726	0.23963	0.620459	TRUE	Negative
CHD8	-0.789913	0.00923791	2.03443	0.326979	0.485481	TRUE	Negative
INO80B	-0.78984	0.0122899	1.91045	0.352712	0.45258	TRUE	Negative
C3orf52	-0.789199	0.00527016	2.27818	0.253101	0.596707	TRUE	Negative
CC2D2B	-0.788887	0.00572689	2.24208	0.261265	0.582919	TRUE	Negative
ZBTB7B	-0.787385	0.00431471	2.36505	0.230222	0.637853	TRUE	Negative
HYI	-0.783606	0.00608342	2.21585	0.269821	0.568924	TRUE	Negative
CAND1	-0.782892	0.00641922	2.19252	0.278388	0.555349	TRUE	Negative
ARL15	-0.780291	0.00581666	2.23533	0.264673	0.57729	TRUE	Negative
C1orf86	-0.779883	0.0135584	1.86779	0.361952	0.441349	TRUE	Negative
SWSAP1	-0.777923	0.00474465	2.3238	0.239921	0.619932	TRUE	Negative
MMS19	-0.776837	0.00809902	2.09157	0.308076	0.511342	TRUE	Negative
KLHL32	-0.773713	0.0117158	1.93123	0.350008	0.455922	TRUE	Negative
REST	-0.773632	0.0113141	1.94638	0.350008	0.455922	TRUE	Negative
KCTD18	-0.77342	0.00448792	2.34795	0.232731	0.633146	TRUE	Negative
RMDN3	-0.77336	0.00878749	2.05614	0.319061	0.496127	TRUE	Negative
METTL6	-0.772364	0.0057148	2.243	0.261265	0.582919	TRUE	Negative
C19orf40	-0.771097	0.0101469	1.99367	0.332186	0.478619	TRUE	Negative
PIGR	-0.769038	0.0102244	1.99036	0.333174	0.477329	TRUE	Negative
GRK6	-0.766489	0.00417485	2.37936	0.227019	0.643939	TRUE	Negative
ENPP3	-0.764331	0.00669673	2.17414	0.286881	0.542298	TRUE	Negative
KCNMA1	-0.762436	0.0095935	2.01802	0.326979	0.485481	TRUE	Negative
ASB18	-0.761102	0.00616338	2.21018	0.271994	0.565441	TRUE	Negative
THUMPD1	-0.760628	0.00494172	2.30612	0.241865	0.616427	TRUE	Negative
GPRC5C	-0.75943	0.00589367	2.22961	0.266109	0.57494	TRUE	Negative
GPR179	-0.759099	0.0104472	1.981	0.337306	0.471976	TRUE	Negative
MRPL50	-0.756223	0.00718768	2.14341	0.291323	0.535626	TRUE	Negative
EDDM3B	-0.752113	0.0156695	1.80494	0.376498	0.424238	TRUE	Negative
BMI1	-0.752109	0.00437945	2.35858	0.230222	0.637853	TRUE	Negative
SURF4	-0.751895	0.00584695	2.23307	0.26468	0.577279	TRUE	Negative
MEAF6	-0.748021	0.00877834	2.05659	0.319061	0.496127	TRUE	Negative
FUT6	-0.748006	0.00475162	2.32316	0.239921	0.619932	TRUE	Negative
SMIM6	-0.746187	0.0121711	1.91467	0.352306	0.45308	TRUE	Negative
DIRAS3	-0.74617	0.00494555	2.30579	0.241865	0.616427	TRUE	Negative
PMFBP1	-0.745984	0.00688616	2.16202	0.28866	0.539614	TRUE	Negative
PRRT2	-0.745661	0.0148826	1.82732	0.369729	0.432117	TRUE	Negative
ZNF728	-0.742499	0.00520204	2.28383	0.251013	0.600304	TRUE	Negative
CMIP	-0.740923	0.0045184	2.34502	0.232731	0.633146	TRUE	Negative
USP44	-0.738079	0.00717985	2.14388	0.291323	0.535626	TRUE	Negative
PPP5C	-0.734574	0.0151387	1.81991	0.372926	0.428378	TRUE	Negative
SLC23A3	-0.73357	0.00478929	2.31973	0.241029	0.617931	TRUE	Negative
ITGAE	-0.733531	0.00625754	2.2036	0.273402	0.563199	TRUE	Negative
LRWD1	-0.732914	0.00542978	2.26522	0.253924	0.595296	TRUE	Negative
OSBPL11	-0.732532	0.00771948	2.11241	0.303428	0.517945	TRUE	Negative
CTDNEP1	-0.730871	0.0124945	1.90328	0.356254	0.44824	TRUE	Negative
MCPH1	-0.730732	0.0183479	1.73641	0.398839	0.399202	TRUE	Negative
C10orf25	-0.729572	0.0155998	1.80688	0.376366	0.424389	TRUE	Negative
PACRGL	-0.729346	0.00747798	2.12622	0.29783	0.526031	TRUE	Negative
PAG1	-0.728279	0.00655741	2.18327	0.28229	0.549304	TRUE	Negative
MON2	-0.726639	0.0119273	1.92346	0.350907	0.454808	TRUE	Negative
ATG4D	-0.726587	0.00717621	2.14411	0.291323	0.535626	TRUE	Negative
C2orf62	-0.725076	0.00819329	2.08654	0.310144	0.508436	TRUE	Negative
MYH10	-0.724311	0.00568759	2.24507	0.261122	0.583157	TRUE	Negative
PIH1D1	-0.723776	0.00974239	2.01133	0.326979	0.485481	TRUE	Negative
GPR1	-0.723502	0.00861074	2.06496	0.317364	0.498442	TRUE	Negative
PEX12	-0.722766	0.0129608	1.88737	0.358512	0.445496	TRUE	Negative
SRSF5	-0.721574	0.0090715	2.04232	0.324505	0.488779	TRUE	Negative
ZDHHC23	-0.720804	0.00714616	2.14593	0.291323	0.535626	TRUE	Negative
ATR	-0.720564	0.00937053	2.02824	0.326979	0.485481	TRUE	Negative
BRCA2	-0.718276	0.00880575	2.05523	0.319061	0.496127	TRUE	Negative
ASL	-0.718075	0.0116113	1.93512	0.350008	0.455922	TRUE	Negative
ATP2C1	-0.717107	0.00603362	2.21942	0.269821	0.568924	TRUE	Negative
BUB1B	-0.715995	0.0134801	1.87031	0.361952	0.441349	TRUE	Negative
LRP2	-0.715515	0.00717266	2.14432	0.291323	0.535626	TRUE	Negative
ZWINT	-0.714186	0.0184246	1.7346	0.399373	0.398622	TRUE	Negative
SRRM1	-0.713912	0.0146566	1.83397	0.367756	0.43444	TRUE	Negative
FAM47E	-0.711975	0.00676951	2.16944	0.288511	0.539838	TRUE	Negative
CMTR2	-0.71143	0.0134103	1.87256	0.361952	0.441349	TRUE	Negative
SUPT3H	-0.710842	0.00793111	2.10067	0.306833	0.513098	TRUE	Negative
FLI1	-0.710532	0.0133646	1.87404	0.361952	0.441349	TRUE	Negative
PASD1	-0.710307	0.00698357	2.15592	0.289036	0.539048	TRUE	Negative
WDR73	-0.709227	0.014962	1.82501	0.371176	0.43042	TRUE	Negative
HMX3	-0.709027	0.0186677	1.72891	0.399853	0.3981	TRUE	Negative
BABAM1	-0.702946	0.010002	1.99991	0.331464	0.479564	TRUE	Negative
C10orf107	-0.701622	0.0147825	1.83025	0.369331	0.432584	TRUE	Negative
G6PD	-0.701079	0.0116949	1.932	0.350008	0.455922	TRUE	Negative
E2F3	-0.70099	0.0140089	1.8536	0.362141	0.441122	TRUE	Negative
C1orf27	-0.699539	0.00848574	2.07131	0.314438	0.502465	TRUE	Negative
TMEM215	-0.697619	0.0102656	1.98861	0.333899	0.476385	TRUE	Negative
EOMES	-0.696681	0.0122281	1.91264	0.352306	0.45308	TRUE	Negative
KIAA0922	-0.694712	0.0106105	1.97427	0.339948	0.468588	TRUE	Negative
MSH2	-0.69446	0.00969678	2.01337	0.326979	0.485481	TRUE	Negative
CTNNA1	-0.693275	0.0143861	1.84206	0.365251	0.437409	TRUE	Negative
DOC2A	-0.693166	0.0101022	1.99558	0.331656	0.479312	TRUE	Negative
IL1A	-0.693089	0.00789097	2.10287	0.305954	0.514345	TRUE	Negative
ATG5	-0.692848	0.014348	1.84321	0.365251	0.437409	TRUE	Negative
KPTN	-0.69252	0.00838313	2.07659	0.313279	0.504068	TRUE	Negative
INA	-0.691184	0.0174781	1.75751	0.388664	0.410426	TRUE	Negative
ADAD2	-0.691169	0.00936885	2.02831	0.326979	0.485481	TRUE	Negative
HIVEP3	-0.690223	0.0157068	1.80391	0.376877	0.4238	TRUE	Negative
FIBP	-0.690178	0.00778784	2.10858	0.305325	0.515237	TRUE	Negative
KHSRP	-0.688963	0.00866601	2.06218	0.317364	0.498442	TRUE	Negative
PNMA3	-0.688817	0.00928519	2.03221	0.326979	0.485481	TRUE	Negative
CHRND	-0.687465	0.0170695	1.76778	0.386849	0.412459	TRUE	Negative
SEPT2	-0.687117	0.0147519	1.83115	0.369091	0.432867	TRUE	Negative
C14orf105	-0.686862	0.0155003	1.80966	0.376353	0.424405	TRUE	Negative
AGAP1	-0.686593	0.0122557	1.91166	0.352306	0.45308	TRUE	Negative
MLEC	-0.686201	0.0113421	1.94531	0.350008	0.455922	TRUE	Negative
HEXIM1	-0.686135	0.0122188	1.91297	0.352306	0.45308	TRUE	Negative
COIL	-0.686019	0.0086558	2.06269	0.317364	0.498442	TRUE	Negative
C10orf55	-0.68548	0.0111549	1.95254	0.349845	0.456124	TRUE	Negative
FFAR1	-0.685105	0.0159281	1.79784	0.378568	0.421856	TRUE	Negative
NISCH	-0.685066	0.0118852	1.92499	0.350255	0.455616	TRUE	Negative
CCM2	-0.683741	0.0155393	1.80857	0.376353	0.424405	TRUE	Negative
YIPF5	-0.682132	0.0094108	2.02637	0.326979	0.485481	TRUE	Negative
CHKA	-0.681853	0.0129035	1.88929	0.358512	0.445496	TRUE	Negative
TMEM181	-0.681798	0.00960587	2.01746	0.326979	0.485481	TRUE	Negative
CYP4F22	-0.680222	0.0113959	1.94325	0.350008	0.455922	TRUE	Negative
STAG2	-0.679065	0.00969765	2.01333	0.326979	0.485481	TRUE	Negative
HAX1	-0.677981	0.0141126	1.85039	0.36292	0.44019	TRUE	Negative
ZNF844	-0.677832	0.0095901	2.01818	0.326979	0.485481	TRUE	Negative
CORIN	-0.677492	0.0133612	1.87415	0.361952	0.441349	TRUE	Negative
QRICH1	-0.676016	0.0116213	1.93475	0.350008	0.455922	TRUE	Negative
SIN3B	-0.675385	0.00881032	2.05501	0.319061	0.496127	TRUE	Negative
RAPGEF3	-0.675063	0.0166876	1.77761	0.384722	0.414853	TRUE	Negative
CTBP1	-0.67495	0.0135653	1.86757	0.361952	0.441349	TRUE	Negative
EPHB2	-0.67417	0.0129779	1.88679	0.358512	0.445496	TRUE	Negative
NID2	-0.673398	0.0181165	1.74193	0.396664	0.401577	TRUE	Negative
SPINK9	-0.672305	0.0152851	1.81573	0.374739	0.426271	TRUE	Negative
DQX1	-0.672016	0.00835494	2.07806	0.312891	0.504606	TRUE	Negative
DNA2	-0.671324	0.013654	1.86474	0.361952	0.441349	TRUE	Negative
SFXN5	-0.670801	0.0156667	1.80502	0.376498	0.424238	TRUE	Negative
ZFP36	-0.669146	0.0139739	1.85468	0.362141	0.441122	TRUE	Negative
SLC16A14	-0.66706	0.00947002	2.02365	0.326979	0.485481	TRUE	Negative
PITPNM2	-0.666292	0.0139987	1.85391	0.362141	0.441122	TRUE	Negative
RBPMS2	-0.666156	0.0162192	1.78997	0.380849	0.419248	TRUE	Negative
ZNF516	-0.66565	0.0122418	1.91215	0.352306	0.45308	TRUE	Negative
GLYATL3	-0.665546	0.0134348	1.87177	0.361952	0.441349	TRUE	Negative
CYP4X1	-0.664948	0.0117854	1.92866	0.350008	0.455922	TRUE	Negative
EPHA4	-0.664155	0.0148667	1.82779	0.369729	0.432117	TRUE	Negative
RNF10	-0.663686	0.0106258	1.97364	0.339948	0.468588	TRUE	Negative
MAB21L2	-0.662955	0.0130577	1.88413	0.360041	0.443648	TRUE	Negative
ZSWIM4	-0.662631	0.0112738	1.94793	0.349845	0.456124	TRUE	Negative
FXYD5	-0.662112	0.0178707	1.74786	0.393335	0.405237	TRUE	Negative
KRT25	-0.660708	0.0145394	1.83745	0.366383	0.436064	TRUE	Negative
TTLL2	-0.66024	0.00962894	2.01642	0.326979	0.485481	TRUE	Negative
PRAMEF12	-0.659225	0.00977246	2.01	0.326979	0.485481	TRUE	Negative
ERBB4	-0.657067	0.0114676	1.94053	0.350008	0.455922	TRUE	Negative
IL36B	-0.656521	0.010093	1.99598	0.331656	0.479312	TRUE	Negative
PAK2	-0.654257	0.0146544	1.83403	0.367756	0.43444	TRUE	Negative
SERPING1	-0.653606	0.0170462	1.76837	0.386849	0.412459	TRUE	Negative
ST3GAL1	-0.653431	0.0135018	1.86961	0.361952	0.441349	TRUE	Negative
KRT15	-0.653227	0.0158629	1.79962	0.378041	0.422461	TRUE	Negative
SLC30A1	-0.652156	0.0143062	1.84448	0.365251	0.437409	TRUE	Negative
CDK5	-0.651451	0.0171834	1.76489	0.38843	0.410687	TRUE	Negative
TPH1	-0.651357	0.0134503	1.87127	0.361952	0.441349	TRUE	Negative
UBN2	-0.651141	0.0132267	1.87855	0.361952	0.441349	TRUE	Negative
POU2F1	-0.651101	0.0165501	1.7812	0.384109	0.415545	TRUE	Negative
PPM1A	-0.645727	0.0127787	1.89351	0.357186	0.447105	TRUE	Negative
HOOK2	-0.645487	0.0138053	1.85995	0.361952	0.441349	TRUE	Negative
SLC4A1AP	-0.644549	0.0122338	1.91244	0.352306	0.45308	TRUE	Negative
MTMR1	-0.64369	0.0166494	1.7786	0.384722	0.414853	TRUE	Negative
ASCC2	-0.643463	0.0173579	1.7605	0.388664	0.410426	TRUE	Negative
YBX2	-0.642389	0.017997	1.7448	0.395125	0.403265	TRUE	Negative
C2orf16	-0.641887	0.0172516	1.76317	0.388664	0.410426	TRUE	Negative
IRF6	-0.640918	0.0142448	1.84634	0.364997	0.43771	TRUE	Negative
PAAF1	-0.639031	0.0174084	1.75924	0.388664	0.410426	TRUE	Negative
VIPR1	-0.638938	0.01176	1.92959	0.350008	0.455922	TRUE	Negative
SERPINB3	-0.637797	0.0134054	1.87272	0.361952	0.441349	TRUE	Negative
MALT1	-0.636158	0.0139992	1.8539	0.362141	0.441122	TRUE	Negative
GAB3	-0.635826	0.0126532	1.8978	0.357186	0.447105	TRUE	Negative
FAM98A	-0.634667	0.0185316	1.73209	0.399373	0.398622	TRUE	Negative
ZNF790	-0.634041	0.0150786	1.82164	0.372134	0.4293	TRUE	Negative
NDFIP1	-0.633803	0.0184688	1.73356	0.399373	0.398622	TRUE	Negative
SCNM1	-0.633332	0.0131717	1.88036	0.361482	0.441914	TRUE	Negative
C9orf66	-0.632749	0.0160178	1.7954	0.378632	0.421783	TRUE	Negative
PAH	-0.632722	0.01851	1.73259	0.399373	0.398622	TRUE	Negative
EML4	-0.632051	0.0143745	1.84241	0.365251	0.437409	TRUE	Negative
CDH19	-0.631178	0.0140371	1.85272	0.362141	0.441122	TRUE	Negative
NXT1	-0.631144	0.0154142	1.81208	0.37498	0.425992	TRUE	Negative
TM7SF2	-0.630696	0.012717	1.89562	0.357186	0.447105	TRUE	Negative
GORASP2	-0.629029	0.0153763	1.81315	0.37498	0.425992	TRUE	Negative
ZFR2	-0.62795	0.0153453	1.81402	0.37498	0.425992	TRUE	Negative
ZNF460	-0.62775	0.0148736	1.82759	0.369729	0.432117	TRUE	Negative
ZNF583	-0.626955	0.0172844	1.76235	0.388664	0.410426	TRUE	Negative
SHF	-0.626621	0.0138889	1.85733	0.362141	0.441122	TRUE	Negative
STRADA	-0.625177	0.0136565	1.86466	0.361952	0.441349	TRUE	Negative
MAGOHB	-0.624981	0.0140088	1.8536	0.362141	0.441122	TRUE	Negative
ACTN1	-0.624916	0.018453	1.73393	0.399373	0.398622	TRUE	Negative
PPIG	-0.624354	0.0166492	1.77861	0.384722	0.414853	TRUE	Negative
SMPDL3B	-0.623818	0.0173735	1.76011	0.388664	0.410426	TRUE	Negative
LRSAM1	-0.623204	0.0175181	1.75651	0.388664	0.410426	TRUE	Negative
GADD45G	-0.622876	0.0179049	1.74703	0.393594	0.404951	TRUE	Negative
THAP1	-0.621941	0.0164261	1.78446	0.384109	0.415545	TRUE	Negative
LLGL2	-0.62188	0.0170156	1.76915	0.386849	0.412459	TRUE	Negative
ZKSCAN1	-0.621461	0.0186481	1.72936	0.399853	0.3981	TRUE	Negative
CDH7	-0.621319	0.0139555	1.85525	0.362141	0.441122	TRUE	Negative
TMCO4	-0.620305	0.0142013	1.84767	0.364666	0.438105	TRUE	Negative
RBM18	-0.620114	0.0165576	1.781	0.384109	0.415545	TRUE	Negative
ALDH3A2	-0.618246	0.0150854	1.82144	0.372134	0.4293	TRUE	Negative
RTN4RL1	-0.617525	0.0157723	1.80211	0.376904	0.423769	TRUE	Negative
PGBD3	-0.615745	0.0159716	1.79665	0.378577	0.421845	TRUE	Negative
TAP1	-0.613684	0.0162585	1.78892	0.38126	0.418779	TRUE	Negative
FN1	-0.613396	0.0170679	1.76782	0.386849	0.412459	TRUE	Negative
KDM6C	-0.613118	0.016003	1.7958	0.378632	0.421783	TRUE	Negative
SCN1A	-0.610737	0.0174742	1.7576	0.388664	0.410426	TRUE	Negative
ZNF480	-0.607015	0.0185898	1.73073	0.399853	0.3981	TRUE	Negative
TAL1	-0.604657	0.0175802	1.75498	0.389229	0.409794	TRUE	Negative
SRRM3	-0.603857	0.0169678	1.77037	0.386849	0.412459	TRUE	Negative
SPIDR	-0.602955	0.0175213	1.75643	0.388664	0.410426	TRUE	Negative
ARMC5	-0.60133	0.0176177	1.75405	0.389229	0.409794	TRUE	Negative

## Sheet: Camptothecin_Resistant
1nM Camptothecin Chemogenomics Screen Resistant Genes
Gene	Differential	pValue	-log(pValue)	FDR	-log(FDR)	Significance	Effect
DDX5	2.59771	1.15683e-08	7.93673	0.000203185	3.69211	TRUE	Positive
TOP1	2.43394	3.93e-07	6.40561	0.000734224	3.13417	TRUE	Positive
IDH3A	2.22551	2.72636e-08	7.56442	0.000226146	3.64561	TRUE	Positive
PARN	2.19763	1.45693e-07	6.83656	0.000511791	3.29091	TRUE	Positive
CCDC101	1.93293	7.15388e-07	6.14546	0.00104709	2.98002	TRUE	Positive
KNTC1	1.71019	6.55858e-07	6.18319	0.00104709	2.98002	TRUE	Positive
C7orf55-LUC7L2	1.70738	1.2068e-06	5.91836	0.00141308	2.84983	TRUE	Positive
YBX1	1.69824	2.41932e-05	4.61631	0.00988209	2.00515	TRUE	Positive
VPS41	1.68139	1.86673e-05	4.72892	0.00840701	2.07536	TRUE	Positive
THAP11	1.63599	8.04938e-06	5.09424	0.00523627	2.28098	TRUE	Positive
SKA1	1.62467	1.75353e-06	5.75609	0.00181171	2.74191	TRUE	Positive
TACC3	1.60601	2.74185e-05	4.56196	0.0100896	1.99613	TRUE	Positive
TP53BP1	1.53832	4.99554e-06	5.30142	0.00381485	2.41852	TRUE	Positive
VPS16	1.52932	2.39466e-06	5.62076	0.00233665	2.63141	TRUE	Positive
SKA2	1.52294	5.17319e-05	4.28624	0.0170889	1.76729	TRUE	Positive
C17orf89	1.5174	2.68059e-05	4.57177	0.0100896	1.99613	TRUE	Positive
DDI2	1.50768	0.000261756	3.5821	0.0446357	1.35032	TRUE	Positive
LAMTOR5	1.49112	0.000106409	3.97302	0.0249195	1.60346	TRUE	Positive
TAF13	1.46054	0.00543417	2.26487	0.253924	0.595296	TRUE	Positive
USP48	1.42615	9.81507e-06	5.00811	0.00556103	2.25484	TRUE	Positive
TADA1	1.42348	9.7349e-06	5.01167	0.00556103	2.25484	TRUE	Positive
TAF4	1.38405	1.73016e-05	4.76191	0.0082131	2.08549	TRUE	Positive
OGT	1.38112	1.65875e-05	4.78022	0.0082131	2.08549	TRUE	Positive
PPP1CC	1.37053	0.000310765	3.50757	0.0476994	1.32149	TRUE	Positive
EEF1G	1.33513	0.000117783	3.92892	0.0257939	1.58848	TRUE	Positive
KIAA0020	1.33404	0.000100274	3.99881	0.0238002	1.62342	TRUE	Positive
CDK8	1.33094	2.74808e-05	4.56097	0.0100896	1.99613	TRUE	Positive
UBFD1	1.32648	5.25394e-05	4.27952	0.0170889	1.76729	TRUE	Positive
TAF11	1.32533	9.6002e-05	4.01772	0.0238002	1.62342	TRUE	Positive
KAT2A	1.32316	0.000211554	3.67458	0.0390987	1.40784	TRUE	Positive
SMARCD1	1.31404	9.89786e-05	4.00446	0.0238002	1.62342	TRUE	Positive
KIF18A	1.29703	0.000245346	3.61022	0.0426659	1.36992	TRUE	Positive
PGP	1.29161	9.8449e-05	4.00679	0.0238002	1.62342	TRUE	Positive
MIOS	1.2887	4.69503e-05	4.32836	0.0158584	1.79974	TRUE	Positive
RMND1	1.28815	0.00019018	3.72084	0.0364996	1.43771	TRUE	Positive
CCNC	1.28737	7.50157e-05	4.12485	0.0223318	1.65108	TRUE	Positive
FAM60A	1.27664	0.00301712	2.52041	0.190369	0.720405	TRUE	Positive
PIGB	1.27032	0.000191184	3.71855	0.0364996	1.43771	TRUE	Positive
KIF22	1.26603	5.57518e-05	4.25374	0.0178041	1.74948	TRUE	Positive
SLC33A1	1.2552	0.000387661	3.41155	0.0544711	1.26383	TRUE	Positive
RPS25	1.24837	9.46698e-05	4.02379	0.0238002	1.62342	TRUE	Positive
ERCC3	1.2437	0.000279521	3.55359	0.0463161	1.33427	TRUE	Positive
VBP1	1.23934	4.16965e-05	4.3799	0.0143599	1.84285	TRUE	Positive
OSBP	1.23842	0.000138997	3.85699	0.0288437	1.53995	TRUE	Positive
VPS18	1.23236	9.18719e-05	4.03682	0.0238002	1.62342	TRUE	Positive
NDUFS2	1.22904	9.75681e-05	4.01069	0.0238002	1.62342	TRUE	Positive
HMBS	1.21221	0.000139588	3.85515	0.0288437	1.53995	TRUE	Positive
SPDL1	1.2028	0.00392611	2.40604	0.218915	0.659725	TRUE	Positive
PDCD5	1.20047	6.26148e-05	4.20332	0.0196387	1.70689	TRUE	Positive
COQ2	1.19603	0.000301342	3.52094	0.0476827	1.32164	TRUE	Positive
TAF2	1.18729	9.11297e-05	4.04034	0.0238002	1.62342	TRUE	Positive
PPRC1	1.17834	0.000301138	3.52123	0.0476827	1.32164	TRUE	Positive
VPS52	1.17303	0.00011422	3.94226	0.0253944	1.59526	TRUE	Positive
RBBP5	1.17294	0.00329732	2.48184	0.20096	0.69689	TRUE	Positive
GPAA1	1.16926	0.000143595	3.84286	0.0293267	1.53274	TRUE	Positive
TSR3	1.16895	0.000210141	3.67749	0.0390987	1.40784	TRUE	Positive
ING3	1.15385	0.000908593	3.04163	0.0978705	1.00935	TRUE	Positive
SP1	1.15163	0.000791977	3.10129	0.0897438	1.047	TRUE	Positive
ZNF143	1.14769	0.00514684	2.28846	0.249033	0.603742	TRUE	Positive
UBR2	1.14172	0.000311754	3.50619	0.0476994	1.32149	TRUE	Positive
ACAD9	1.13557	9.90242e-05	4.00426	0.0238002	1.62342	TRUE	Positive
TAF5	1.12836	0.00253695	2.59569	0.170867	0.767343	TRUE	Positive
LIAS	1.11683	0.000366625	3.43578	0.0525805	1.27918	TRUE	Positive
RICTOR	1.11262	0.00175883	2.75478	0.143684	0.842592	TRUE	Positive
TRIP13	1.11121	0.000298132	3.52559	0.0476827	1.32164	TRUE	Positive
PA2G4	1.10918	0.00023108	3.63624	0.0414152	1.38284	TRUE	Positive
TSR1	1.10571	0.00531893	2.27418	0.253545	0.595945	TRUE	Positive
CRKL	1.10425	0.0011309	2.94658	0.114156	0.942503	TRUE	Positive
EIF4G1	1.104	0.000855629	3.06771	0.0939267	1.02721	TRUE	Positive
XYLT2	1.09837	0.000174411	3.75843	0.0344198	1.46319	TRUE	Positive
IPO11	1.09604	0.00054932	3.26017	0.0699149	1.15543	TRUE	Positive
ZNF330	1.0933	0.000617744	3.20919	0.0758746	1.1199	TRUE	Positive
STT3B	1.09269	0.000229185	3.63981	0.0414152	1.38284	TRUE	Positive
GNPNAT1	1.08792	0.000531373	3.2746	0.0686253	1.16352	TRUE	Positive
ACTR1A	1.0849	0.0015856	2.79981	0.138029	0.860029	TRUE	Positive
RNF8	1.08426	0.00167988	2.77472	0.140502	0.852319	TRUE	Positive
NPLOC4	1.08395	0.00128604	2.89075	0.124796	0.903801	TRUE	Positive
NDUFAF6	1.07621	0.00166037	2.7798	0.139535	0.855318	TRUE	Positive
SLC20A1	1.07431	0.000763907	3.11696	0.0876946	1.05703	TRUE	Positive
DUSP12	1.06979	0.000298338	3.52529	0.0476827	1.32164	TRUE	Positive
HNRNPD	1.06192	0.00182207	2.73943	0.146818	0.83322	TRUE	Positive
PELO	1.06007	0.000294878	3.53036	0.0476827	1.32164	TRUE	Positive
PPP1R15B	1.05991	0.00112778	2.94777	0.114156	0.942503	TRUE	Positive
PTP4A1	1.05904	0.000267138	3.57326	0.0451155	1.34567	TRUE	Positive
CTRC	1.05902	0.00255621	2.5924	0.170867	0.767343	TRUE	Positive
VPS33A	1.05421	0.00117088	2.93149	0.116849	0.932376	TRUE	Positive
CEP152	1.0534	0.00159419	2.79746	0.138029	0.860029	TRUE	Positive
SMARCA4	1.04888	0.00854671	2.0682	0.31603	0.500271	TRUE	Positive
MED12	1.04834	0.000428689	3.36786	0.0583682	1.23382	TRUE	Positive
VPS35	1.042	0.0021037	2.67702	0.1546	0.81079	TRUE	Positive
EIF4H	1.03844	0.00109326	2.96128	0.11164	0.952181	TRUE	Positive
HDAC2	1.03767	0.00126935	2.89642	0.12386	0.907068	TRUE	Positive
TRMT10A	1.03767	0.000396775	3.40146	0.0553092	1.2572	TRUE	Positive
HIST1H1E	1.03035	0.000537814	3.26937	0.0689501	1.16147	TRUE	Positive
UBXN7	1.02905	0.000575414	3.24002	0.0727092	1.13841	TRUE	Positive
TAF3	1.02527	0.000936731	3.02839	0.0985194	1.00648	TRUE	Positive
FCGR1A	1.02455	0.00194451	2.71119	0.149771	0.824572	TRUE	Positive
TAF10	1.0213	0.00182125	2.73963	0.146818	0.83322	TRUE	Positive
CDK6	1.02023	0.00131158	2.88221	0.125469	0.901463	TRUE	Positive
PSMG1	1.0188	0.000405313	3.39221	0.0560545	1.25139	TRUE	Positive
SLC4A7	1.01826	0.00118565	2.92604	0.117654	0.929393	TRUE	Positive
TADA3	1.01359	0.000924989	3.03386	0.0978705	1.00935	TRUE	Positive
JPH4	1.01344	0.0106557	1.97242	0.340269	0.468177	TRUE	Positive
VASN	1.01177	0.00241492	2.6171	0.16802	0.774639	TRUE	Positive
HTR1A	1.01122	0.00190274	2.72062	0.149101	0.82652	TRUE	Positive
PDSS1	1.01076	0.000352186	3.45323	0.0515483	1.28779	TRUE	Positive
TRMT1	1.00341	0.000597559	3.22362	0.0744364	1.12821	TRUE	Positive
DPH6	0.997362	0.00122959	2.91024	0.121329	0.916036	TRUE	Positive
CLTC	0.995664	0.0115182	1.93862	0.350008	0.455922	TRUE	Positive
OTUB1	0.995608	0.00140026	2.85379	0.127431	0.894727	TRUE	Positive
DCP2	0.991408	0.00199289	2.70052	0.150228	0.823248	TRUE	Positive
ACTB	0.991274	0.0106746	1.97165	0.340269	0.468177	TRUE	Positive
C3orf17	0.991011	0.0100648	1.99719	0.331656	0.479312	TRUE	Positive
WSB2	0.990915	0.000735781	3.13325	0.0855844	1.06761	TRUE	Positive
PNRC2	0.989803	0.00465811	2.33179	0.237834	0.623726	TRUE	Positive
DPH5	0.984975	0.000848234	3.07148	0.0937005	1.02826	TRUE	Positive
SMARCA5	0.984402	0.00131563	2.88087	0.125469	0.901463	TRUE	Positive
CSNK1A1	0.984202	0.00424376	2.37225	0.227943	0.642174	TRUE	Positive
CRAMP1L	0.980912	0.00442928	2.35367	0.231535	0.635382	TRUE	Positive
ADRM1	0.979917	0.00277279	2.55708	0.181721	0.740594	TRUE	Positive
PRG2	0.97145	0.00494481	2.30585	0.241865	0.616427	TRUE	Positive
TMEM131	0.970313	0.00281977	2.54979	0.182754	0.738132	TRUE	Positive
PIGF	0.963433	0.00242024	2.61614	0.16802	0.774639	TRUE	Positive
TMCO1	0.957375	0.00366304	2.43616	0.212336	0.672977	TRUE	Positive
PFDN5	0.95483	0.00584505	2.23321	0.26468	0.577279	TRUE	Positive
ITGB5	0.953993	0.00918747	2.0368	0.326979	0.485481	TRUE	Positive
CENPM	0.953238	0.00527413	2.27785	0.253101	0.596707	TRUE	Positive
RPL35A	0.953086	0.00684653	2.16453	0.288511	0.539838	TRUE	Positive
PDSS2	0.951786	0.00157829	2.80181	0.138029	0.860029	TRUE	Positive
PGLS	0.949065	0.0116194	1.93482	0.350008	0.455922	TRUE	Positive
COX17	0.94643	0.000774906	3.11075	0.0883795	1.05365	TRUE	Positive
UBE4B	0.9451	0.000612902	3.21261	0.0758099	1.12027	TRUE	Positive
GPATCH4	0.944541	0.00380068	2.42014	0.215418	0.666719	TRUE	Positive
NKRF	0.940418	0.000923731	3.03445	0.0978705	1.00935	TRUE	Positive
PSMD3	0.939485	0.00465786	2.33181	0.237834	0.623726	TRUE	Positive
TIMM8A	0.933547	0.00171348	2.76612	0.141961	0.847832	TRUE	Positive
PDCL	0.933224	0.0092791	2.03249	0.326979	0.485481	TRUE	Positive
TRMU	0.930684	0.00188762	2.72409	0.149101	0.82652	TRUE	Positive
YEATS4	0.930609	0.00459741	2.33749	0.236108	0.626889	TRUE	Positive
SRP72	0.92757	0.00720609	2.1423	0.291323	0.535626	TRUE	Positive
TMX2	0.921006	0.0016362	2.78616	0.139522	0.855358	TRUE	Positive
THEMIS2	0.920979	0.00490006	2.3098	0.241865	0.616427	TRUE	Positive
TBRG4	0.917179	0.00226849	2.64426	0.162628	0.788805	TRUE	Positive
CELF1	0.916933	0.00139001	2.85698	0.127431	0.894727	TRUE	Positive
GPI	0.913542	0.000873583	3.0587	0.0953019	1.0209	TRUE	Positive
GZF1	0.913275	0.00198749	2.7017	0.150228	0.823248	TRUE	Positive
IFRD2	0.911874	0.00217808	2.66193	0.159278	0.797844	TRUE	Positive
ZNF236	0.911317	0.00451825	2.34503	0.232731	0.633146	TRUE	Positive
NUFIP1	0.911023	0.00183899	2.73542	0.146818	0.83322	TRUE	Positive
TAF9B	0.908106	0.00763497	2.11719	0.30135	0.520929	TRUE	Positive
TADA2B	0.907828	0.00263072	2.57993	0.175022	0.756906	TRUE	Positive
C5AR1	0.903401	0.00280733	2.55171	0.182622	0.738447	TRUE	Positive
CHD1	0.902833	0.000904486	3.0436	0.0978705	1.00935	TRUE	Positive
SUV39H1	0.902811	0.00154003	2.81247	0.136363	0.865304	TRUE	Positive
GCN1L1	0.902193	0.00137909	2.86041	0.127431	0.894727	TRUE	Positive
LIN54	0.900905	0.0168428	1.77359	0.38579	0.413649	TRUE	Positive
TIAL1	0.895023	0.00130729	2.88363	0.125469	0.901463	TRUE	Positive
HIST1H1C	0.894233	0.00159531	2.79716	0.138029	0.860029	TRUE	Positive
NDUFA6	0.893853	0.00386106	2.41329	0.217358	0.662824	TRUE	Positive
C12orf44	0.892833	0.00279546	2.55355	0.182526	0.738675	TRUE	Positive
UQCC2	0.892646	0.00224815	2.64817	0.162496	0.789157	TRUE	Positive
PRIM1	0.890905	0.00255852	2.59201	0.170867	0.767343	TRUE	Positive
PIK3C3	0.887377	0.00229477	2.63926	0.163843	0.785573	TRUE	Positive
CPSF7	0.884089	0.0109597	1.9602	0.344974	0.462214	TRUE	Positive
SMG9	0.883598	0.0012407	2.90633	0.121741	0.914562	TRUE	Positive
USP14	0.880491	0.0025287	2.5971	0.170867	0.767343	TRUE	Positive
RPS27L	0.879384	0.0127734	1.89369	0.357186	0.447105	TRUE	Positive
PANX1	0.877805	0.00812004	2.09044	0.308076	0.511342	TRUE	Positive
PCYT1A	0.877748	0.00400518	2.39738	0.220524	0.656545	TRUE	Positive
OR51L1	0.87598	0.00300915	2.52156	0.190369	0.720405	TRUE	Positive
VPS51	0.875951	0.00536853	2.27014	0.253545	0.595945	TRUE	Positive
LRPPRC	0.873949	0.00134299	2.87193	0.125469	0.901463	TRUE	Positive
PPIB	0.87276	0.0039222	2.40647	0.218915	0.659725	TRUE	Positive
ANAPC13	0.872432	0.00235823	2.62741	0.165019	0.782465	TRUE	Positive
SLC7A3	0.871832	0.00254786	2.59382	0.170867	0.767343	TRUE	Positive
SCGB2B2	0.868894	0.00170077	2.76936	0.141575	0.849015	TRUE	Positive
LUC7L	0.868391	0.00182442	2.73887	0.146818	0.83322	TRUE	Positive
DCTD	0.86621	0.00307861	2.51164	0.19243	0.715728	TRUE	Positive
ZW10	0.866098	0.00787923	2.10352	0.305954	0.514345	TRUE	Positive
SAP30	0.865466	0.00209087	2.67967	0.154302	0.811627	TRUE	Positive
CLDN9	0.86511	0.00139593	2.85514	0.127431	0.894727	TRUE	Positive
RWDD4	0.863443	0.0103236	1.98617	0.334612	0.475458	TRUE	Positive
IKBKAP	0.861999	0.0115066	1.93905	0.350008	0.455922	TRUE	Positive
MAD2L1BP	0.860879	0.00323528	2.49009	0.199384	0.700309	TRUE	Positive
MRPL23	0.859178	0.00200166	2.69861	0.150244	0.823202	TRUE	Positive
CCNT1	0.858971	0.00142304	2.84678	0.128176	0.892194	TRUE	Positive
WDR24	0.858941	0.0181801	1.7404	0.396664	0.401577	TRUE	Positive
ANAPC4	0.855808	0.00348645	2.45762	0.20758	0.682816	TRUE	Positive
LIPT1	0.855165	0.00296519	2.52795	0.189384	0.722656	TRUE	Positive
PIK3CB	0.852962	0.00381433	2.41858	0.215418	0.666719	TRUE	Positive
PSMA2	0.852522	0.00373153	2.42811	0.215418	0.666719	TRUE	Positive
ALKBH8	0.852456	0.0118189	1.92742	0.350064	0.455853	TRUE	Positive
HEATR1	0.851475	0.0144777	1.8393	0.366236	0.436239	TRUE	Positive
BRD9	0.85037	0.00192331	2.71595	0.149473	0.825436	TRUE	Positive
DEK	0.849925	0.00380781	2.41932	0.215418	0.666719	TRUE	Positive
TYRO3	0.849515	0.00624152	2.20471	0.273382	0.563231	TRUE	Positive
C11orf73	0.844456	0.00220063	2.65745	0.159719	0.796644	TRUE	Positive
VPS29	0.843432	0.00196125	2.70747	0.149771	0.824572	TRUE	Positive
C14orf166	0.84286	0.00345473	2.46159	0.20758	0.682816	TRUE	Positive
SP8	0.839372	0.0162183	1.78999	0.380849	0.419248	TRUE	Positive
CENPI	0.837915	0.00940632	2.02658	0.326979	0.485481	TRUE	Positive
NDUFAF4	0.836669	0.00336705	2.47275	0.203822	0.69075	TRUE	Positive
DPY30	0.835796	0.00232781	2.63305	0.164634	0.783481	TRUE	Positive
KCNJ14	0.835261	0.00730699	2.13626	0.293684	0.53212	TRUE	Positive
CORO1C	0.830341	0.00387972	2.4112	0.217711	0.662121	TRUE	Positive
RBM42	0.829543	0.0140411	1.8526	0.362141	0.441122	TRUE	Positive
PFDN4	0.829522	0.00253947	2.59526	0.170867	0.767343	TRUE	Positive
PIM2	0.829443	0.003146	2.50224	0.194564	0.710937	TRUE	Positive
ASXL1	0.828862	0.00206156	2.6858	0.153106	0.815007	TRUE	Positive
NDUFB8	0.828123	0.00249153	2.60353	0.170867	0.767343	TRUE	Positive
CKAP2L	0.827749	0.00622404	2.20593	0.273298	0.563364	TRUE	Positive
TAF5L	0.825883	0.00356592	2.44783	0.210882	0.675961	TRUE	Positive
PTPN9	0.82512	0.00810508	2.09124	0.308076	0.511342	TRUE	Positive
C9orf78	0.824361	0.00955203	2.0199	0.326979	0.485481	TRUE	Positive
ALG2	0.823652	0.011876	1.92533	0.350255	0.455616	TRUE	Positive
FAM104A	0.823145	0.00330662	2.48062	0.20096	0.69689	TRUE	Positive
TMEM261	0.822154	0.00233397	2.63191	0.164634	0.783481	TRUE	Positive
SMARCC1	0.822043	0.00694212	2.15851	0.288937	0.539197	TRUE	Positive
EXTL3	0.820927	0.00499136	2.30178	0.242849	0.614664	TRUE	Positive
CENPW	0.819585	0.00488934	2.31075	0.241865	0.616427	TRUE	Positive
C19orf43	0.817873	0.00436346	2.36017	0.230222	0.637853	TRUE	Positive
TACO1	0.817493	0.0118682	1.92561	0.350255	0.455616	TRUE	Positive
LACTB	0.815186	0.0021855	2.66045	0.159278	0.797844	TRUE	Positive
PSMD6	0.815012	0.009787	2.00935	0.326979	0.485481	TRUE	Positive
ZFC3H1	0.813557	0.0113614	1.94457	0.350008	0.455922	TRUE	Positive
TUBB	0.812426	0.0048859	2.31106	0.241865	0.616427	TRUE	Positive
DNAJC11	0.81187	0.0107034	1.97048	0.340571	0.467792	TRUE	Positive
NSUN2	0.81121	0.00551831	2.25819	0.255735	0.59221	TRUE	Positive
RAB34	0.807719	0.0186673	1.72892	0.399853	0.3981	TRUE	Positive
IPO7	0.805626	0.0122301	1.91257	0.352306	0.45308	TRUE	Positive
CD3EAP	0.805493	0.00439105	2.35743	0.230222	0.637853	TRUE	Positive
MIPEP	0.802977	0.0136726	1.86415	0.361952	0.441349	TRUE	Positive
TAF12	0.802019	0.0143904	1.84193	0.365251	0.437409	TRUE	Positive
COMMD3	0.801466	0.0090106	2.04525	0.322984	0.490819	TRUE	Positive
BAG6	0.801333	0.00432762	2.36375	0.230222	0.637853	TRUE	Positive
ASPM	0.800877	0.0183317	1.7368	0.398839	0.399202	TRUE	Positive
TFAP4	0.800327	0.0110122	1.95813	0.346007	0.460915	TRUE	Positive
EBNA1BP2	0.798635	0.00953445	2.0207	0.326979	0.485481	TRUE	Positive
PTP4A2	0.798404	0.00396466	2.40179	0.21967	0.65823	TRUE	Positive
EIF4A1	0.798078	0.00800032	2.09689	0.307479	0.512185	TRUE	Positive
NKTR	0.797776	0.00378395	2.42205	0.215418	0.666719	TRUE	Positive
GTPBP3	0.79449	0.00562928	2.24955	0.259508	0.585849	TRUE	Positive
WNK1	0.793314	0.00533097	2.27319	0.253545	0.595945	TRUE	Positive
PREX2	0.791712	0.00428535	2.36801	0.229475	0.639264	TRUE	Positive
TEX12	0.790933	0.0102233	1.99041	0.333174	0.477329	TRUE	Positive
SKP2	0.789371	0.00833163	2.07927	0.312685	0.504893	TRUE	Positive
NDUFB11	0.789241	0.00744092	2.12837	0.297028	0.527202	TRUE	Positive
USP10	0.789154	0.00546673	2.26227	0.254015	0.595141	TRUE	Positive
YAP1	0.78861	0.0178072	1.7494	0.392922	0.405694	TRUE	Positive
MED7	0.787699	0.0171326	1.76618	0.38778	0.411415	TRUE	Positive
COMMD2	0.78623	0.00946803	2.02374	0.326979	0.485481	TRUE	Positive
SP2	0.785928	0.0148742	1.82757	0.369729	0.432117	TRUE	Positive
RAB1B	0.785321	0.0159536	1.79714	0.378577	0.421845	TRUE	Positive
DERL3	0.784914	0.0137863	1.86055	0.361952	0.441349	TRUE	Positive
VCP	0.783807	0.0123651	1.9078	0.353715	0.451346	TRUE	Positive
PREPL	0.783461	0.0031388	2.50324	0.194564	0.710937	TRUE	Positive
HYPK	0.782889	0.00311471	2.50658	0.193996	0.712208	TRUE	Positive
DRC1	0.78264	0.00542975	2.26522	0.253924	0.595296	TRUE	Positive
MRPL48	0.78089	0.0137039	1.86315	0.361952	0.441349	TRUE	Positive
COQ3	0.780565	0.0155564	1.80809	0.376353	0.424405	TRUE	Positive
XRN1	0.779147	0.00494839	2.30554	0.241865	0.616427	TRUE	Positive
PDRG1	0.777707	0.0116639	1.93316	0.350008	0.455922	TRUE	Positive
EIF3J	0.777512	0.00545421	2.26327	0.254015	0.595141	TRUE	Positive
TMEM161A	0.776973	0.014008	1.85362	0.362141	0.441122	TRUE	Positive
ATP5B	0.776919	0.00971159	2.01271	0.326979	0.485481	TRUE	Positive
UBA2	0.775583	0.00569401	2.24458	0.261122	0.583157	TRUE	Positive
BRD2	0.774245	0.00684976	2.16432	0.288511	0.539838	TRUE	Positive
TRIM8	0.774217	0.0043713	2.35939	0.230222	0.637853	TRUE	Positive
MFN2	0.770089	0.0153584	1.81365	0.37498	0.425992	TRUE	Positive
IRF3	0.769151	0.0145269	1.83783	0.366383	0.436064	TRUE	Positive
TBL2	0.768993	0.00721506	2.14176	0.291323	0.535626	TRUE	Positive
CCDC86	0.767975	0.0116815	1.9325	0.350008	0.455922	TRUE	Positive
GTF2A1	0.766827	0.00761521	2.11832	0.301247	0.521077	TRUE	Positive
FBXO40	0.766745	0.0160602	1.79425	0.378632	0.421783	TRUE	Positive
PKN2	0.766637	0.0152854	1.81572	0.374739	0.426271	TRUE	Positive
PDCD6IP	0.766278	0.00898229	2.04661	0.322984	0.490819	TRUE	Positive
IL4	0.766004	0.0101562	1.99327	0.332186	0.478619	TRUE	Positive
LCN1	0.765606	0.00530843	2.27503	0.253545	0.595945	TRUE	Positive
ABCA10	0.764376	0.0168679	1.77294	0.38579	0.413649	TRUE	Positive
IMMT	0.763346	0.011727	1.93081	0.350008	0.455922	TRUE	Positive
SHQ1	0.763167	0.0122282	1.91264	0.352306	0.45308	TRUE	Positive
PNN	0.763081	0.00485601	2.31372	0.241865	0.616427	TRUE	Positive
SLC24A1	0.762669	0.0119731	1.92179	0.351664	0.453872	TRUE	Positive
PSMC6	0.762481	0.00678463	2.16847	0.288511	0.539838	TRUE	Positive
ARIH1	0.760906	0.0136746	1.86408	0.361952	0.441349	TRUE	Positive
PDLIM7	0.759803	0.00475362	2.32298	0.239921	0.619932	TRUE	Positive
AKR1A1	0.759637	0.0112031	1.95066	0.349845	0.456124	TRUE	Positive
MGAT1	0.759576	0.00605337	2.218	0.269821	0.568924	TRUE	Positive
MEIOB	0.758928	0.00760596	2.11885	0.301247	0.521077	TRUE	Positive
DKC1	0.758912	0.00945015	2.02456	0.326979	0.485481	TRUE	Positive
TSC22D2	0.757035	0.00420204	2.37654	0.227411	0.643189	TRUE	Positive
RER1	0.75104	0.0138071	1.8599	0.361952	0.441349	TRUE	Positive
SLFN11	0.750519	0.00646388	2.18951	0.279634	0.553409	TRUE	Positive
CYP26C1	0.749865	0.013112	1.88233	0.360406	0.443209	TRUE	Positive
NDUFB5	0.749166	0.00537	2.27003	0.253545	0.595945	TRUE	Positive
MYO1C	0.748954	0.00711926	2.14757	0.291323	0.535626	TRUE	Positive
AKIRIN2	0.748634	0.0112481	1.94892	0.349845	0.456124	TRUE	Positive
NUBPL	0.748387	0.00996098	2.0017	0.330727	0.48053	TRUE	Positive
METTL16	0.748039	0.0078345	2.10599	0.305954	0.514345	TRUE	Positive
PBRM1	0.746239	0.00599045	2.22254	0.269785	0.568981	TRUE	Positive
NDC80	0.746149	0.00827055	2.08247	0.312182	0.505593	TRUE	Positive
WDR59	0.746081	0.00812111	2.09038	0.308076	0.511342	TRUE	Positive
ZBTB12	0.74578	0.00796654	2.09873	0.307405	0.512289	TRUE	Positive
ZIM3	0.745446	0.0108506	1.96455	0.344008	0.463431	TRUE	Positive
SNRPA	0.745367	0.00920799	2.03584	0.326979	0.485481	TRUE	Positive
MRPL54	0.745291	0.0133521	1.87445	0.361952	0.441349	TRUE	Positive
WDR74	0.745209	0.0144918	1.83888	0.366236	0.436239	TRUE	Positive
EIF2B3	0.744417	0.00787838	2.10356	0.305954	0.514345	TRUE	Positive
SIRT2	0.742642	0.00701701	2.15385	0.289312	0.538634	TRUE	Positive
YAF2	0.742561	0.00654185	2.1843	0.28229	0.549304	TRUE	Positive
PET117	0.742376	0.00848054	2.07158	0.314438	0.502465	TRUE	Positive
RAD23B	0.741581	0.00485222	2.31406	0.241865	0.616427	TRUE	Positive
GRM3	0.740938	0.0137903	1.86043	0.361952	0.441349	TRUE	Positive
FBP1	0.74031	0.0117971	1.92822	0.350008	0.455922	TRUE	Positive
NUDT5	0.740302	0.0111837	1.95142	0.349845	0.456124	TRUE	Positive
LAMTOR4	0.737502	0.0114463	1.94134	0.350008	0.455922	TRUE	Positive
HLCS	0.73564	0.012772	1.89374	0.357186	0.447105	TRUE	Positive
STRIP1	0.734031	0.01344	1.8716	0.361952	0.441349	TRUE	Positive
PSMD11	0.731625	0.00675842	2.17015	0.288511	0.539838	TRUE	Positive
MBTD1	0.73088	0.0124347	1.90536	0.355128	0.449615	TRUE	Positive
OPA1	0.730495	0.00605887	2.21761	0.269821	0.568924	TRUE	Positive
TRRAP	0.72998	0.0109194	1.9618	0.344432	0.462897	TRUE	Positive
SERF2	0.729563	0.0053571	2.27107	0.253545	0.595945	TRUE	Positive
CFDP1	0.729329	0.0178338	1.74876	0.393015	0.40559	TRUE	Positive
RLF	0.727996	0.00867313	2.06182	0.317364	0.498442	TRUE	Positive
NDUFA1	0.726787	0.00887156	2.052	0.320618	0.494013	TRUE	Positive
MSN	0.72676	0.0121776	1.91444	0.352306	0.45308	TRUE	Positive
CERS2	0.726679	0.0180414	1.74373	0.395604	0.402739	TRUE	Positive
SLC29A1	0.726521	0.0142558	1.84601	0.364997	0.43771	TRUE	Positive
RAB7A	0.725831	0.0100653	1.99717	0.331656	0.479312	TRUE	Positive
FBXO42	0.724869	0.00901013	2.04527	0.322984	0.490819	TRUE	Positive
CLTCL1	0.724772	0.0165157	1.7821	0.384109	0.415545	TRUE	Positive
RBM10	0.724103	0.00693801	2.15877	0.288937	0.539197	TRUE	Positive
SNRNP40	0.723484	0.00829993	2.08093	0.312182	0.505593	TRUE	Positive
CDCA8	0.722887	0.00979223	2.00912	0.326979	0.485481	TRUE	Positive
KIF15	0.722845	0.00627746	2.20222	0.273591	0.562898	TRUE	Positive
SETDB1	0.721596	0.00752861	2.12329	0.299168	0.524084	TRUE	Positive
CSTF1	0.719027	0.00830043	2.0809	0.312182	0.505593	TRUE	Positive
USP16	0.714992	0.00847709	2.07175	0.314438	0.502465	TRUE	Positive
MGARP	0.714265	0.00798091	2.09795	0.307405	0.512289	TRUE	Positive
PDCD11	0.713586	0.00950289	2.02214	0.326979	0.485481	TRUE	Positive
GPR152	0.713078	0.00698363	2.15592	0.289036	0.539048	TRUE	Positive
B4GALT5	0.712985	0.00955879	2.0196	0.326979	0.485481	TRUE	Positive
RHEB	0.7129	0.0126731	1.89712	0.357186	0.447105	TRUE	Positive
NDUFA11	0.712677	0.0125805	1.9003	0.357186	0.447105	TRUE	Positive
TRNAU1AP	0.710938	0.00863094	2.06394	0.317364	0.498442	TRUE	Positive
RANBP1	0.709333	0.00690917	2.16057	0.288935	0.5392	TRUE	Positive
THRA	0.709321	0.00607071	2.21676	0.269821	0.568924	TRUE	Positive
BLMH	0.708716	0.0060733	2.21658	0.269821	0.568924	TRUE	Positive
ARHGDIA	0.708301	0.0105932	1.97497	0.339948	0.468588	TRUE	Positive
BRD7	0.707725	0.00940519	2.02663	0.326979	0.485481	TRUE	Positive
HK2	0.705965	0.0168638	1.77304	0.38579	0.413649	TRUE	Positive
NRBP1	0.702402	0.00948942	2.02276	0.326979	0.485481	TRUE	Positive
FOPNL	0.702232	0.0074101	2.13018	0.296471	0.528017	TRUE	Positive
HELZ	0.701751	0.00680374	2.16725	0.288511	0.539838	TRUE	Positive
NME6	0.701334	0.00686862	2.16313	0.288613	0.539684	TRUE	Positive
CXCR5	0.700659	0.0152976	1.81538	0.374739	0.426271	TRUE	Positive
MAPKAP1	0.700655	0.00803249	2.09515	0.308041	0.511392	TRUE	Positive
BPIFB6	0.700499	0.00665932	2.17657	0.285976	0.54367	TRUE	Positive
NSUN5	0.699605	0.0128776	1.89016	0.358512	0.445496	TRUE	Positive
TUBGCP3	0.699293	0.00740125	2.13069	0.296471	0.528017	TRUE	Positive
MTRF1	0.69717	0.0127465	1.89461	0.357186	0.447105	TRUE	Positive
ACBD4	0.696466	0.0135147	1.86919	0.361952	0.441349	TRUE	Positive
PHF8	0.694338	0.00718081	2.14383	0.291323	0.535626	TRUE	Positive
ACAT1	0.693332	0.016869	1.77291	0.38579	0.413649	TRUE	Positive
EMC4	0.693255	0.0105664	1.97607	0.339948	0.468588	TRUE	Positive
AMBP	0.692129	0.0134852	1.87014	0.361952	0.441349	TRUE	Positive
EIF2B4	0.691951	0.00896171	2.04761	0.322984	0.490819	TRUE	Positive
ANKRD49	0.69142	0.015845	1.80011	0.378041	0.422461	TRUE	Positive
PRPF4B	0.690737	0.0166909	1.77752	0.384722	0.414853	TRUE	Positive
RB1CC1	0.690521	0.015402	1.81242	0.37498	0.425992	TRUE	Positive
EIF4EBP1	0.689002	0.0136289	1.86554	0.361952	0.441349	TRUE	Positive
AP3D1	0.681109	0.00967354	2.01441	0.326979	0.485481	TRUE	Positive
NELFB	0.680797	0.00973601	2.01162	0.326979	0.485481	TRUE	Positive
RPP40	0.680555	0.0152372	1.81709	0.374739	0.426271	TRUE	Positive
TMEM147	0.679242	0.00940709	2.02654	0.326979	0.485481	TRUE	Positive
TEX19	0.678702	0.014358	1.84291	0.365251	0.437409	TRUE	Positive
GET4	0.678514	0.0157695	1.80218	0.376904	0.423769	TRUE	Positive
KIAA1210	0.677968	0.0107549	1.96839	0.34159	0.466494	TRUE	Positive
CPOX	0.675509	0.010919	1.96182	0.344432	0.462897	TRUE	Positive
SDHAF1	0.674963	0.0120424	1.91929	0.352306	0.45308	TRUE	Positive
CENPF	0.673979	0.0129819	1.88666	0.358512	0.445496	TRUE	Positive
APC2	0.673262	0.0125166	1.90251	0.356308	0.448175	TRUE	Positive
GRPEL1	0.672185	0.0116954	1.93199	0.350008	0.455922	TRUE	Positive
EEF2	0.669094	0.012111	1.91682	0.352306	0.45308	TRUE	Positive
NUS1	0.667334	0.0129172	1.88883	0.358512	0.445496	TRUE	Positive
CHMP2A	0.667074	0.0127409	1.8948	0.357186	0.447105	TRUE	Positive
PLEKHG2	0.667027	0.0099462	2.00234	0.330727	0.48053	TRUE	Positive
CNOT3	0.665566	0.0140779	1.85146	0.362558	0.440622	TRUE	Positive
HTR3A	0.664966	0.0127373	1.89492	0.357186	0.447105	TRUE	Positive
NUDT2	0.664188	0.00968391	2.01395	0.326979	0.485481	TRUE	Positive
DENND5A	0.66355	0.0120704	1.91828	0.352306	0.45308	TRUE	Positive
TPX2	0.662319	0.0114937	1.93954	0.350008	0.455922	TRUE	Positive
FCGBP	0.662298	0.0160601	1.79425	0.378632	0.421783	TRUE	Positive
MAPRE1	0.659518	0.0127915	1.89308	0.357186	0.447105	TRUE	Positive
LYG2	0.656459	0.01152	1.93855	0.350008	0.455922	TRUE	Positive
SMAD9	0.655426	0.0136581	1.86461	0.361952	0.441349	TRUE	Positive
SNAPC4	0.655012	0.0184535	1.73392	0.399373	0.398622	TRUE	Positive
ACSBG2	0.654613	0.0134211	1.87221	0.361952	0.441349	TRUE	Positive
RNASE9	0.653207	0.0112707	1.94805	0.349845	0.456124	TRUE	Positive
SYF2	0.652841	0.0169828	1.76999	0.386849	0.412459	TRUE	Positive
FASTKD3	0.652493	0.0112314	1.94957	0.349845	0.456124	TRUE	Positive
PUS1	0.652122	0.018602	1.73044	0.399853	0.3981	TRUE	Positive
RHOT2	0.651061	0.0159211	1.79803	0.378568	0.421856	TRUE	Positive
NDUFA3	0.650784	0.0117248	1.9309	0.350008	0.455922	TRUE	Positive
NDUFA13	0.650725	0.0174592	1.75798	0.388664	0.410426	TRUE	Positive
SMG1	0.649802	0.0165301	1.78173	0.384109	0.415545	TRUE	Positive
TOR1B	0.649753	0.0121362	1.91592	0.352306	0.45308	TRUE	Positive
KIAA0586	0.648119	0.0181675	1.74071	0.396664	0.401577	TRUE	Positive
NONO	0.647841	0.0167326	1.77644	0.385178	0.414339	TRUE	Positive
DUS3L	0.646963	0.0147396	1.83151	0.369091	0.432867	TRUE	Positive
SMARCB1	0.646913	0.016542	1.78141	0.384109	0.415545	TRUE	Positive
MALSU1	0.64137	0.0144663	1.83964	0.366236	0.436239	TRUE	Positive
UPRT	0.641269	0.0129288	1.88844	0.358512	0.445496	TRUE	Positive
MAZ	0.641024	0.0123234	1.90927	0.353098	0.452105	TRUE	Positive
PSMB3	0.640201	0.0181415	1.74133	0.396664	0.401577	TRUE	Positive
COMMD4	0.63998	0.0176164	1.75408	0.389229	0.409794	TRUE	Positive
PLP1	0.635891	0.013108	1.88246	0.360406	0.443209	TRUE	Positive
KMT2A	0.634923	0.0182513	1.73871	0.397723	0.400419	TRUE	Positive
TANC2	0.634845	0.0172503	1.7632	0.388664	0.410426	TRUE	Positive
RNH1	0.634819	0.0150575	1.82225	0.372134	0.4293	TRUE	Positive
NDST1	0.634731	0.0155858	1.80727	0.376366	0.424389	TRUE	Positive
ATP5SL	0.634	0.0185181	1.7324	0.399373	0.398622	TRUE	Positive
C19orf44	0.633142	0.0156582	1.80526	0.376498	0.424238	TRUE	Positive
PSMC2	0.632612	0.0137263	1.86245	0.361952	0.441349	TRUE	Positive
AWAT1	0.630941	0.0150415	1.82271	0.372134	0.4293	TRUE	Positive
HPS1	0.628679	0.0138376	1.85894	0.362141	0.441122	TRUE	Positive
NAA40	0.625916	0.0165264	1.78182	0.384109	0.415545	TRUE	Positive
DLG3	0.62562	0.0155426	1.80848	0.376353	0.424405	TRUE	Positive
SUPT20H	0.621998	0.0161785	1.79106	0.380849	0.419248	TRUE	Positive
RTN4IP1	0.618307	0.016796	1.77479	0.38579	0.413649	TRUE	Positive
GCC2	0.616236	0.016929	1.77137	0.386659	0.412672	TRUE	Positive
RRAGA	0.612102	0.016408	1.78494	0.384109	0.415545	TRUE	Positive
TSPYL1	0.607804	0.0173201	1.76145	0.388664	0.410426	TRUE	Positive
C1QTNF7	0.597452	0.0175257	1.75632	0.388664	0.410426	TRUE	Positive

## Sheet: Colchicine_Sensitive
9.2nM Colchicine Chemogenomics Screen Sensitive Genes
Gene	Differential	pValue	-log(pValue)	FDR	-log(FDR)	Significance	Effect
CLASP1	-3.34884	1.15362e-10	9.93794	1.75389e-06	5.756	TRUE	Negative
ABCC1	-3.06877	1.30182e-09	8.88545	5.7163e-06	5.24288	TRUE	Negative
SGOL2	-2.69998	2.86524e-09	8.54284	1.0065e-05	4.99719	TRUE	Negative
FBXO42	-2.62856	6.85454e-09	8.16402	1.9501e-05	4.70994	TRUE	Negative
KIAA0907	-2.46787	3.89641e-08	7.40934	6.22151e-05	4.2061	TRUE	Negative
TIAL1	-2.32658	2.47911e-06	5.6057	0.00101263	2.99455	TRUE	Negative
TMEM30A	-2.30896	1.73823e-06	5.75989	0.000825145	3.08347	TRUE	Negative
GGNBP2	-2.29833	1.53735e-06	5.81323	0.000750058	3.1249	TRUE	Negative
DPH2	-2.29747	1.06271e-07	6.97358	0.000133325	3.87509	TRUE	Negative
GSG2	-2.22525	5.52654e-05	4.25755	0.0101113	1.99519	TRUE	Negative
DEPDC5	-2.20534	3.67234e-07	6.43506	0.000322505	3.49146	TRUE	Negative
FBXO11	-2.18689	8.42223e-08	7.07457	0.000113791	3.94389	TRUE	Negative
STMN1	-2.12356	5.02188e-05	4.29913	0.00958742	2.0183	TRUE	Negative
NPRL2	-2.09421	6.17973e-07	6.20903	0.000452254	3.34462	TRUE	Negative
KIF15	-2.08636	3.78239e-06	5.42223	0.00138404	2.85885	TRUE	Negative
DLGAP5	-2.08364	4.93321e-07	6.30687	0.000376725	3.42398	TRUE	Negative
PPFIA1	-2.02593	4.19007e-07	6.37778	0.000350449	3.45537	TRUE	Negative
TUBB4B	-1.98911	3.1268e-06	5.5049	0.0011939	2.92303	TRUE	Negative
KNTC1	-1.93904	2.24913e-06	5.64799	0.000987592	3.00542	TRUE	Negative
TSC1	-1.93604	2.54679e-06	5.59401	0.00101663	2.99284	TRUE	Negative
SOGA1	-1.90432	6.13522e-05	4.21217	0.0108847	1.96318	TRUE	Negative
ASPM	-1.89906	5.92585e-06	5.22725	0.00192744	2.71502	TRUE	Negative
USP14	-1.89154	1.13357e-05	4.94555	0.00326394	2.48626	TRUE	Negative
SMS	-1.87472	2.40583e-06	5.61874	0.00100609	2.99736	TRUE	Negative
KPNA3	-1.86556	5.25623e-06	5.27933	0.0018102	2.74227	TRUE	Negative
TNPO1	-1.81392	5.71969e-06	5.24263	0.00189548	2.72228	TRUE	Negative
UBA5	-1.80077	1.99654e-06	5.69972	0.00089916	3.04616	TRUE	Negative
DPH1	-1.78649	3.66379e-06	5.43607	0.00136916	2.86354	TRUE	Negative
ZNF638	-1.78396	0.000201002	3.6968	0.0269369	1.56965	TRUE	Negative
MTF1	-1.77586	1.96103e-05	4.70751	0.00499183	2.30174	TRUE	Negative
ZBTB14	-1.7739	0.000246675	3.60787	0.028884	1.53934	TRUE	Negative
SNRPB2	-1.76463	1.61458e-05	4.79194	0.00439381	2.35716	TRUE	Negative
PFDN1	-1.75737	5.65646e-05	4.24746	0.0101378	1.99406	TRUE	Negative
BIRC6	-1.73271	9.85209e-06	5.00647	0.00298349	2.52528	TRUE	Negative
DHX35	-1.70738	2.18123e-05	4.6613	0.005321	2.27401	TRUE	Negative
C1orf27	-1.69988	5.38186e-06	5.26907	0.00181783	2.74045	TRUE	Negative
SZT2	-1.68643	1.62604e-05	4.78887	0.00439381	2.35716	TRUE	Negative
PFDN5	-1.67133	5.08647e-05	4.29358	0.00960631	2.01744	TRUE	Negative
UBA6	-1.61798	5.38076e-05	4.26916	0.00994818	2.00226	TRUE	Negative
SRSF2	-1.61595	2.03541e-05	4.69135	0.00510713	2.29182	TRUE	Negative
PMF1	-1.61435	0.000655346	3.18353	0.0597863	1.2234	TRUE	Negative
EIF4E2	-1.61069	0.000302041	3.51993	0.0333651	1.47671	TRUE	Negative
OLA1	-1.60256	1.89614e-05	4.72213	0.00489763	2.31001	TRUE	Negative
DNAJC24	-1.58621	4.83307e-05	4.31578	0.009432	2.0254	TRUE	Negative
KPNA4	-1.57545	2.6473e-05	4.5772	0.00611805	2.21339	TRUE	Negative
INPP4A	-1.54912	0.000185965	3.73057	0.0259229	1.58632	TRUE	Negative
RBM7	-1.54652	0.00025648	3.59095	0.0294858	1.53039	TRUE	Negative
UBE2D2	-1.5289	2.71017e-05	4.567	0.00614428	2.21153	TRUE	Negative
UFSP2	-1.48628	3.50096e-05	4.45581	0.00732035	2.13547	TRUE	Negative
PFDN4	-1.48364	2.59245e-05	4.58629	0.00607117	2.21673	TRUE	Negative
CCDC6	-1.47422	0.000208575	3.68074	0.0269369	1.56965	TRUE	Negative
FCHO2	-1.46988	0.000125026	3.903	0.0189307	1.72283	TRUE	Negative
GCLM	-1.45891	3.00223e-05	4.52256	0.00667483	2.17556	TRUE	Negative
MTPN	-1.44491	4.30296e-05	4.36623	0.00868704	2.06113	TRUE	Negative
FKBPL	-1.43687	3.77135e-05	4.4235	0.00770233	2.11338	TRUE	Negative
ATP8B2	-1.41698	0.000108859	3.96314	0.0170714	1.76773	TRUE	Negative
GPS2	-1.40435	0.00023245	3.63367	0.0281569	1.55042	TRUE	Negative
PRR14L	-1.39489	0.000251874	3.59882	0.0292975	1.53317	TRUE	Negative
TACC3	-1.39205	8.13087e-05	4.08986	0.014001	1.85384	TRUE	Negative
ADIPOR2	-1.37696	7.73695e-05	4.11143	0.0134546	1.87113	TRUE	Negative
NF2	-1.36815	0.0011282	2.94761	0.0889484	1.05086	TRUE	Negative
RBM34	-1.366	0.000228335	3.64143	0.0281569	1.55042	TRUE	Negative
GPATCH8	-1.36531	0.000465322	3.33225	0.0472525	1.32558	TRUE	Negative
PIK3R2	-1.3522	0.000428367	3.36818	0.0442578	1.35401	TRUE	Negative
ATMIN	-1.33477	9.01911e-05	4.04484	0.0149445	1.82552	TRUE	Negative
QKI	-1.33088	9.60318e-05	4.01758	0.0156176	1.80639	TRUE	Negative
BCAS2	-1.32555	0.000195765	3.70827	0.0268626	1.57085	TRUE	Negative
NDE1	-1.32462	9.98192e-05	4.00079	0.0160846	1.79359	TRUE	Negative
CBLL1	-1.3136	0.000188115	3.72558	0.0260161	1.58476	TRUE	Negative
GIGYF2	-1.30484	0.000230074	3.63813	0.0281569	1.55042	TRUE	Negative
WRAP73	-1.29741	0.000232401	3.63376	0.0281569	1.55042	TRUE	Negative
DDX31	-1.2929	0.00200285	2.69835	0.124745	0.903977	TRUE	Negative
TNRC18	-1.28991	0.000208351	3.68121	0.0269369	1.56965	TRUE	Negative
LZTR1	-1.28408	0.000491052	3.30887	0.0483537	1.31557	TRUE	Negative
GPBP1	-1.27913	0.000711109	3.14806	0.063251	1.19893	TRUE	Negative
KDM3B	-1.2772	0.000137372	3.8621	0.0206223	1.68566	TRUE	Negative
MSL2	-1.27263	0.000681319	3.16665	0.0614795	1.21127	TRUE	Negative
SETD1B	-1.26194	0.000299231	3.52399	0.0332639	1.47803	TRUE	Negative
FTSJ1	-1.24754	0.000232272	3.634	0.0281569	1.55042	TRUE	Negative
CMIP	-1.24599	0.000206998	3.68403	0.0269369	1.56965	TRUE	Negative
KIFC1	-1.23534	0.00018185	3.74029	0.0255521	1.59257	TRUE	Negative
ACTR1B	-1.23304	0.00073002	3.13667	0.0641104	1.19307	TRUE	Negative
LARP1	-1.22978	0.00247399	2.6066	0.139721	0.854739	TRUE	Negative
KNSTRN	-1.22385	0.000990659	3.00408	0.0814363	1.08918	TRUE	Negative
LRRC8D	-1.22252	0.000280739	3.5517	0.031407	1.50297	TRUE	Negative
ITGAM	-1.2219	0.000207947	3.68205	0.0269369	1.56965	TRUE	Negative
CSNK1A1	-1.21657	0.000242694	3.61494	0.0288018	1.54058	TRUE	Negative
MYH9	-1.21656	0.00530596	2.27524	0.212287	0.673077	TRUE	Negative
C7orf55-LUC7L2	-1.20264	0.000478591	3.32004	0.0478718	1.31992	TRUE	Negative
RFWD2	-1.20151	0.00183271	2.73691	0.117911	0.928444	TRUE	Negative
CALM3	-1.20044	0.000468112	3.32965	0.0472525	1.32558	TRUE	Negative
FAM193A	-1.19335	0.00143307	2.84373	0.101086	0.99531	TRUE	Negative
SLAIN1	-1.19256	0.000479699	3.31903	0.0478718	1.31992	TRUE	Negative
APOL3	-1.18943	0.00228343	2.64141	0.133074	0.875906	TRUE	Negative
GCLC	-1.18911	0.000333872	3.47642	0.0357569	1.44664	TRUE	Negative
BORA	-1.18157	0.00744142	2.12834	0.252319	0.59805	TRUE	Negative
THSD7A	-1.17215	0.00257845	2.58864	0.14233	0.846704	TRUE	Negative
HJURP	-1.16985	0.00105718	2.97585	0.0844014	1.07365	TRUE	Negative
CPSF7	-1.1638	0.000567397	3.24611	0.0532928	1.27333	TRUE	Negative
BAG6	-1.16335	0.00805594	2.09388	0.262852	0.580289	TRUE	Negative
BRD1	-1.14007	0.000777821	3.10912	0.066792	1.17528	TRUE	Negative
PAFAH1B2	-1.13905	0.000787538	3.10373	0.0671471	1.17297	TRUE	Negative
DNAJC21	-1.13622	0.00061163	3.21351	0.0571418	1.24305	TRUE	Negative
GNL1	-1.13467	0.00203258	2.69195	0.124826	0.903695	TRUE	Negative
FBXO22	-1.13455	0.000682561	3.16586	0.0614795	1.21127	TRUE	Negative
TSC2	-1.13269	0.00178349	2.74873	0.116019	0.935469	TRUE	Negative
TEX33	-1.1324	0.00150764	2.8217	0.104734	0.979911	TRUE	Negative
DPH7	-1.12906	0.00234445	2.62996	0.134581	0.871017	TRUE	Negative
HDAC3	-1.1277	0.00077957	3.10815	0.066792	1.17528	TRUE	Negative
CMTR2	-1.12687	0.00494991	2.3054	0.204085	0.690189	TRUE	Negative
PSMD1	-1.12166	0.000774012	3.11125	0.066792	1.17528	TRUE	Negative
RBFOX2	-1.11318	0.000774148	3.11118	0.066792	1.17528	TRUE	Negative
TATDN2	-1.10836	0.000625924	3.20348	0.0581679	1.23532	TRUE	Negative
NCAPH2	-1.10338	0.00356507	2.44793	0.172498	0.763215	TRUE	Negative
UFC1	-1.1032	0.00705613	2.15143	0.244928	0.610961	TRUE	Negative
NUAK1	-1.10149	0.00115839	2.93614	0.089055	1.05034	TRUE	Negative
PTEN	-1.09216	0.000716634	3.1447	0.063251	1.19893	TRUE	Negative
MYBL2	-1.08842	0.0039246	2.4062	0.18283	0.737953	TRUE	Negative
CENPO	-1.08803	0.00146377	2.83453	0.102566	0.988996	TRUE	Negative
TRMT61A	-1.08414	0.00158501	2.79997	0.107904	0.966964	TRUE	Negative
TMEM33	-1.08161	0.00295094	2.53004	0.153171	0.814823	TRUE	Negative
RAB35	-1.08015	0.00185795	2.73097	0.118666	0.925675	TRUE	Negative
SNRNP70	-1.07964	0.00332218	2.47858	0.1653	0.781728	TRUE	Negative
ANAPC4	-1.0768	0.00275152	2.56043	0.145632	0.836742	TRUE	Negative
BAHD1	-1.07625	0.00121705	2.91469	0.0909626	1.04114	TRUE	Negative
ZC3H14	-1.07214	0.00273522	2.56301	0.14558	0.836899	TRUE	Negative
CLK1	-1.07042	0.00312195	2.50557	0.160333	0.794976	TRUE	Negative
ZNF19	-1.0672	0.00170874	2.76732	0.112217	0.949942	TRUE	Negative
RNF146	-1.06575	0.00214118	2.66935	0.128243	0.891965	TRUE	Negative
SMNDC1	-1.06079	0.00316789	2.49923	0.161278	0.792425	TRUE	Negative
RWDD1	-1.06046	0.00221425	2.65477	0.130161	0.885518	TRUE	Negative
DYRK1A	-1.05891	0.00513602	2.28937	0.209302	0.679227	TRUE	Negative
NCOR1	-1.05785	0.00806112	2.0936	0.262852	0.580289	TRUE	Negative
FBXL3	-1.05737	0.00620191	2.20747	0.228845	0.640458	TRUE	Negative
QTRTD1	-1.05645	0.00168105	2.77442	0.111	0.954677	TRUE	Negative
CNBP	-1.05308	0.00320586	2.49405	0.161804	0.791011	TRUE	Negative
HIGD2B	-1.05055	0.0056335	2.24922	0.217302	0.662935	TRUE	Negative
SH3GL1	-1.0493	0.00215923	2.6657	0.128559	0.890899	TRUE	Negative
CASC5	-1.04497	0.00140457	2.85246	0.100256	0.998888	TRUE	Negative
TROAP	-1.03662	0.00167149	2.7769	0.111	0.954677	TRUE	Negative
WAC	-1.03594	0.00154469	2.81116	0.106448	0.972862	TRUE	Negative
COX14	-1.03585	0.0154454	1.8112	0.355548	0.449102	TRUE	Negative
KPNA2	-1.03542	0.00271002	2.56703	0.145562	0.836952	TRUE	Negative
TGIF2	-1.03525	0.00256572	2.59079	0.14233	0.846704	TRUE	Negative
TBL1XR1	-1.02576	0.00117124	2.93135	0.089055	1.05034	TRUE	Negative
NUDT7	-1.02513	0.00588545	2.23022	0.222725	0.65223	TRUE	Negative
PDCD5	-1.02407	0.00453607	2.34332	0.196876	0.705806	TRUE	Negative
GTSE1	-1.02258	0.00558333	2.25311	0.217029	0.663483	TRUE	Negative
DNAJC7	-1.0149	0.00229569	2.63909	0.133074	0.875906	TRUE	Negative
CXCR1	-1.01342	0.00167565	2.77582	0.111	0.954677	TRUE	Negative
PEX10	-1.01303	0.00201004	2.6968	0.12475	0.903958	TRUE	Negative
MEAF6	-1.01134	0.00648961	2.18778	0.23262	0.633354	TRUE	Negative
UCHL3	-1.01033	0.00263625	2.57901	0.142471	0.846274	TRUE	Negative
GIP	-1.01028	0.00533014	2.27326	0.21277	0.67209	TRUE	Negative
KCMF1	-1.00963	0.00474768	2.32352	0.200526	0.69783	TRUE	Negative
LYST	-1.00791	0.00206055	2.68602	0.125665	0.900786	TRUE	Negative
ZNF516	-1.00761	0.00214664	2.66824	0.128243	0.891965	TRUE	Negative
GTF3C2	-1.00447	0.00235759	2.62753	0.134882	0.870046	TRUE	Negative
C9orf41	-1.00439	0.0133108	1.8758	0.336308	0.473262	TRUE	Negative
TRIM37	-1.00193	0.00309946	2.50871	0.159645	0.796845	TRUE	Negative
THUMPD1	-1.00027	0.00414284	2.3827	0.187056	0.728028	TRUE	Negative
TP53I11	-0.997811	0.00667772	2.17537	0.235045	0.628849	TRUE	Negative
ASCC2	-0.995118	0.00858575	2.06622	0.269286	0.569786	TRUE	Negative
DET1	-0.992991	0.00455914	2.34112	0.196876	0.705806	TRUE	Negative
SLC4A1AP	-0.992142	0.00607134	2.21672	0.227857	0.642338	TRUE	Negative
DFFA	-0.99185	0.00284904	2.5453	0.149268	0.826032	TRUE	Negative
UPF2	-0.99123	0.0045621	2.34084	0.196876	0.705806	TRUE	Negative
HDLBP	-0.99097	0.00253979	2.5952	0.14233	0.846704	TRUE	Negative
GAK	-0.989768	0.00600881	2.22121	0.225993	0.645905	TRUE	Negative
THRAP3	-0.989489	0.00194219	2.71171	0.122308	0.912546	TRUE	Negative
CNNM3	-0.987106	0.00750838	2.12445	0.253758	0.59558	TRUE	Negative
CCNL1	-0.983263	0.00246166	2.60877	0.139473	0.85551	TRUE	Negative
C1orf35	-0.982306	0.0022158	2.65447	0.130161	0.885518	TRUE	Negative
MAP2K7	-0.981526	0.00712514	2.14721	0.24635	0.608447	TRUE	Negative
CORIN	-0.977238	0.00327379	2.48495	0.16382	0.785633	TRUE	Negative
C12orf29	-0.974897	0.00360386	2.44323	0.172946	0.76209	TRUE	Negative
SPAG5	-0.970469	0.00450618	2.34619	0.196394	0.706873	TRUE	Negative
LARP4B	-0.969121	0.00363443	2.43956	0.173191	0.761476	TRUE	Negative
CXXC1	-0.968863	0.00268973	2.57029	0.144915	0.838885	TRUE	Negative
PPP2R2A	-0.967656	0.00272795	2.56416	0.14558	0.836899	TRUE	Negative
CHKA	-0.967331	0.00254871	2.59368	0.14233	0.846704	TRUE	Negative
ITFG2	-0.966899	0.00482036	2.31692	0.201471	0.695788	TRUE	Negative
BRD8	-0.962453	0.00796124	2.09902	0.262852	0.580289	TRUE	Negative
INPPL1	-0.962086	0.0184085	1.73498	0.383089	0.4167	TRUE	Negative
OAZ1	-0.961623	0.0222774	1.65214	0.397584	0.400571	TRUE	Negative
C1orf63	-0.959356	0.00369598	2.43227	0.175449	0.755849	TRUE	Negative
UBR4	-0.95678	0.00482915	2.31613	0.201471	0.695788	TRUE	Negative
SKA1	-0.956299	0.00516319	2.28708	0.209922	0.677942	TRUE	Negative
KLHDC2	-0.954434	0.00287061	2.54203	0.149612	0.825033	TRUE	Negative
C7orf26	-0.95377	0.00223338	2.65104	0.130757	0.883535	TRUE	Negative
ACTA2	-0.949322	0.00460088	2.33716	0.198008	0.703317	TRUE	Negative
IL19	-0.94447	0.00313437	2.50385	0.160502	0.794521	TRUE	Negative
MAPK8	-0.943379	0.00617884	2.20909	0.228474	0.641163	TRUE	Negative
CCDC90B	-0.941178	0.00359108	2.44478	0.172805	0.762444	TRUE	Negative
MAD2L1BP	-0.940093	0.00932108	2.03053	0.282213	0.549423	TRUE	Negative
DCTN1	-0.935515	0.00481482	2.31742	0.201471	0.695788	TRUE	Negative
SMIM3	-0.932195	0.00429209	2.36733	0.189407	0.722605	TRUE	Negative
EIF3D	-0.931762	0.0100985	1.99574	0.294147	0.531436	TRUE	Negative
MAP3K2	-0.930445	0.00419741	2.37702	0.189034	0.72346	TRUE	Negative
AGFG1	-0.928734	0.00282465	2.54904	0.148539	0.828158	TRUE	Negative
ERF	-0.928683	0.00406671	2.39076	0.185046	0.732721	TRUE	Negative
IQCG	-0.92695	0.00317912	2.49769	0.161382	0.792146	TRUE	Negative
ARL15	-0.92592	0.00568623	2.24518	0.217588	0.662365	TRUE	Negative
TBC1D24	-0.92363	0.00314934	2.50178	0.160799	0.793716	TRUE	Negative
UFM1	-0.923099	0.0119166	1.92385	0.320541	0.494117	TRUE	Negative
HSPA6	-0.921783	0.00529456	2.27617	0.212287	0.673077	TRUE	Negative
FUBP3	-0.921679	0.00361903	2.44141	0.173191	0.761476	TRUE	Negative
DSC3	-0.921383	0.00425348	2.37126	0.189191	0.7231	TRUE	Negative
HNRNPD	-0.921038	0.0179531	1.74586	0.379388	0.420917	TRUE	Negative
TAF5	-0.920668	0.00617873	2.2091	0.228474	0.641163	TRUE	Negative
MIER3	-0.919152	0.003485	2.4578	0.16909	0.771882	TRUE	Negative
C15orf60	-0.918642	0.00558523	2.25296	0.217029	0.663483	TRUE	Negative
TTC33	-0.918223	0.00358497	2.44551	0.172805	0.762444	TRUE	Negative
DCTN2	-0.917623	0.0153366	1.81427	0.355548	0.449102	TRUE	Negative
CLTA	-0.916195	0.00642584	2.19207	0.232533	0.633515	TRUE	Negative
HERC2	-0.916123	0.0052692	2.27826	0.212287	0.673077	TRUE	Negative
C16orf72	-0.913172	0.0106841	1.97126	0.30513	0.515515	TRUE	Negative
RNF182	-0.910111	0.0170023	1.76949	0.369573	0.432299	TRUE	Negative
DCTN4	-0.909494	0.00544603	2.26392	0.215944	0.665659	TRUE	Negative
CD34	-0.908441	0.00474941	2.32336	0.200526	0.69783	TRUE	Negative
ASXL3	-0.908373	0.00527543	2.27774	0.212287	0.673077	TRUE	Negative
PRMT7	-0.903313	0.00845498	2.07289	0.268336	0.571321	TRUE	Negative
KIF21A	-0.903039	0.0039989	2.39806	0.18291	0.737763	TRUE	Negative
KPTN	-0.900913	0.0039234	2.40634	0.18283	0.737953	TRUE	Negative
BMP6	-0.900039	0.00522974	2.28152	0.211936	0.673794	TRUE	Negative
PLIN2	-0.899372	0.00388228	2.41091	0.182811	0.737998	TRUE	Negative
BLACE	-0.899041	0.00613342	2.2123	0.227995	0.642074	TRUE	Negative
PITPNB	-0.898715	0.0156555	1.80533	0.357383	0.446866	TRUE	Negative
PAM	-0.897338	0.00501037	2.30013	0.205612	0.686951	TRUE	Negative
FN1	-0.89698	0.00644534	2.19075	0.232533	0.633515	TRUE	Negative
RXRA	-0.896792	0.0215453	1.66665	0.394201	0.404283	TRUE	Negative
GALNT13	-0.893915	0.00430273	2.36626	0.189407	0.722605	TRUE	Negative
C2orf62	-0.893108	0.00899731	2.04589	0.276274	0.55866	TRUE	Negative
CYBA	-0.891973	0.00484167	2.31501	0.201514	0.695694	TRUE	Negative
TTC4	-0.890682	0.00561939	2.25031	0.217302	0.662935	TRUE	Negative
SEC24B	-0.890264	0.0192328	1.71596	0.385544	0.413926	TRUE	Negative
KIF21B	-0.888826	0.0119794	1.92156	0.321026	0.49346	TRUE	Negative
SESN2	-0.885729	0.00593023	2.22693	0.223516	0.650691	TRUE	Negative
PTGR2	-0.884896	0.00493216	2.30696	0.203832	0.690728	TRUE	Negative
CLPP	-0.884585	0.00488235	2.31137	0.202249	0.694114	TRUE	Negative
CEP192	-0.882997	0.00407744	2.38961	0.185055	0.7327	TRUE	Negative
LCLAT1	-0.881055	0.00566678	2.24666	0.217588	0.662365	TRUE	Negative
TOX3	-0.880862	0.0114366	1.9417	0.314846	0.501902	TRUE	Negative
LHFP	-0.880768	0.00970412	2.01304	0.287911	0.540742	TRUE	Negative
IMPA2	-0.880614	0.007318	2.13561	0.250065	0.601947	TRUE	Negative
TKT	-0.879908	0.00425276	2.37133	0.189191	0.7231	TRUE	Negative
TBC1D31	-0.879823	0.00582904	2.2344	0.222567	0.652539	TRUE	Negative
TXNDC9	-0.879531	0.013246	1.87791	0.336308	0.473262	TRUE	Negative
TOR2A	-0.878887	0.0104018	1.98289	0.299195	0.524045	TRUE	Negative
CNOT7	-0.878315	0.00425474	2.37113	0.189191	0.7231	TRUE	Negative
C1orf216	-0.877998	0.00646073	2.18972	0.232533	0.633515	TRUE	Negative
TMPRSS12	-0.876998	0.00752806	2.12332	0.253787	0.595531	TRUE	Negative
CDCA8	-0.875372	0.0106497	1.97266	0.30513	0.515515	TRUE	Negative
COL8A2	-0.873231	0.0066527	2.177	0.234758	0.62938	TRUE	Negative
C11orf91	-0.871882	0.00613354	2.21229	0.227995	0.642074	TRUE	Negative
PHF3	-0.871549	0.00806634	2.09332	0.262852	0.580289	TRUE	Negative
CYSLTR2	-0.871211	0.0146798	1.83328	0.350347	0.455501	TRUE	Negative
ATP10B	-0.870961	0.00889355	2.05092	0.274843	0.560916	TRUE	Negative
SP1	-0.868772	0.0104081	1.98263	0.299195	0.524045	TRUE	Negative
MATR3	-0.867274	0.0142863	1.84508	0.346192	0.460683	TRUE	Negative
IPPK	-0.866661	0.0116958	1.93197	0.319706	0.495249	TRUE	Negative
SNRPA	-0.865597	0.0161878	1.79081	0.360816	0.442715	TRUE	Negative
PBK	-0.864455	0.00698531	2.15581	0.243433	0.613621	TRUE	Negative
KLF6	-0.861765	0.00642018	2.19245	0.232533	0.633515	TRUE	Negative
ADAD2	-0.860227	0.00588134	2.23052	0.222725	0.65223	TRUE	Negative
MECR	-0.860188	0.00652742	2.18526	0.232797	0.633024	TRUE	Negative
CMTR1	-0.859883	0.00981562	2.00808	0.289264	0.538705	TRUE	Negative
SLC35A1	-0.859182	0.00718029	2.14386	0.247769	0.605953	TRUE	Negative
DAXX	-0.858318	0.0218091	1.66136	0.395707	0.402627	TRUE	Negative
PRKRIP1	-0.857463	0.0126118	1.89922	0.328841	0.483014	TRUE	Negative
GPR39	-0.857186	0.0064179	2.19261	0.232533	0.633515	TRUE	Negative
MKRN2	-0.855551	0.00530563	2.27526	0.212287	0.673077	TRUE	Negative
PLEKHA1	-0.855127	0.00884228	2.05344	0.274392	0.561629	TRUE	Negative
AP2A2	-0.855021	0.00725015	2.13965	0.249201	0.60345	TRUE	Negative
FAM169B	-0.853932	0.00791232	2.1017	0.262707	0.580529	TRUE	Negative
ZNF367	-0.853661	0.00901368	2.0451	0.276294	0.558629	TRUE	Negative
PGM1	-0.853486	0.00741587	2.12984	0.252319	0.59805	TRUE	Negative
MTF2	-0.852637	0.0122051	1.91346	0.323823	0.489692	TRUE	Negative
GREM2	-0.852111	0.0212243	1.67317	0.393842	0.404678	TRUE	Negative
MC1R	-0.85189	0.00638565	2.19479	0.232533	0.633515	TRUE	Negative
UBE2K	-0.851112	0.00853823	2.06863	0.268721	0.570699	TRUE	Negative
IKBKB	-0.850486	0.00640002	2.19382	0.232533	0.633515	TRUE	Negative
APPL2	-0.850422	0.00727219	2.13833	0.24947	0.602981	TRUE	Negative
NRROS	-0.849527	0.0138837	1.85749	0.342973	0.46474	TRUE	Negative
PPP4R1	-0.848811	0.00883433	2.05383	0.274392	0.561629	TRUE	Negative
DCAF5	-0.847907	0.00611938	2.21329	0.227995	0.642074	TRUE	Negative
TRMT10C	-0.845137	0.00938352	2.02763	0.282213	0.549423	TRUE	Negative
PHC1	-0.844343	0.0213127	1.67136	0.394201	0.404283	TRUE	Negative
NUP188	-0.842824	0.0147131	1.8323	0.350491	0.455324	TRUE	Negative
DUS4L	-0.842776	0.0073931	2.13117	0.252141	0.598357	TRUE	Negative
WFDC13	-0.842689	0.00728755	2.13742	0.24951	0.602913	TRUE	Negative
CBL	-0.842605	0.00799593	2.09713	0.262852	0.580289	TRUE	Negative
METTL6	-0.842242	0.00937187	2.02817	0.282213	0.549423	TRUE	Negative
DPH5	-0.840911	0.0159509	1.79722	0.357805	0.446353	TRUE	Negative
EGR1	-0.840762	0.017104	1.7669	0.369573	0.432299	TRUE	Negative
CEP44	-0.840436	0.00957656	2.01879	0.285335	0.544645	TRUE	Negative
MYL6	-0.839349	0.00564165	2.24859	0.217302	0.662935	TRUE	Negative
ATP6V1F	-0.837156	0.00953086	2.02087	0.284733	0.545562	TRUE	Negative
ENKUR	-0.833483	0.0158507	1.79995	0.357383	0.446866	TRUE	Negative
SKA2	-0.833447	0.0131075	1.88248	0.335598	0.474181	TRUE	Negative
C1orf195	-0.8324	0.0119172	1.92383	0.320541	0.494117	TRUE	Negative
CHRDL2	-0.831359	0.00764217	2.11678	0.256159	0.591491	TRUE	Negative
ENTPD2	-0.831054	0.0170286	1.76882	0.369573	0.432299	TRUE	Negative
HDAC6	-0.830593	0.0125022	1.90301	0.328353	0.48366	TRUE	Negative
PCDHB3	-0.828464	0.00743324	2.12882	0.252319	0.59805	TRUE	Negative
PNLDC1	-0.828092	0.0112754	1.94787	0.313356	0.503962	TRUE	Negative
KCNJ8	-0.827267	0.00938218	2.0277	0.282213	0.549423	TRUE	Negative
DPEP3	-0.827176	0.0107946	1.9668	0.306839	0.513089	TRUE	Negative
POR	-0.826823	0.00762034	2.11803	0.256146	0.591513	TRUE	Negative
GPX1	-0.825883	0.00875384	2.0578	0.272611	0.564457	TRUE	Negative
MSMO1	-0.825437	0.00950818	2.0219	0.284733	0.545562	TRUE	Negative
CENPC	-0.824698	0.0117041	1.93166	0.319706	0.495249	TRUE	Negative
WIPI2	-0.824016	0.0141174	1.85025	0.345223	0.461901	TRUE	Negative
TXNDC17	-0.823133	0.0113236	1.94601	0.313452	0.503829	TRUE	Negative
UBL7	-0.822772	0.00981513	2.0081	0.289264	0.538705	TRUE	Negative
ELOVL5	-0.821772	0.0201481	1.69577	0.389952	0.408989	TRUE	Negative
ROCK1	-0.820967	0.00779581	2.10814	0.260811	0.583675	TRUE	Negative
OTOP2	-0.819845	0.00908703	2.04158	0.278057	0.555866	TRUE	Negative
TRMT11	-0.819733	0.0128688	1.89046	0.3328	0.477816	TRUE	Negative
ZNF623	-0.819099	0.0109829	1.95928	0.30766	0.511928	TRUE	Negative
UBE3D	-0.816687	0.0119354	1.92316	0.320541	0.494117	TRUE	Negative
CDKN2C	-0.813841	0.00870282	2.06034	0.271503	0.566225	TRUE	Negative
BIRC5	-0.813	0.013159	1.88078	0.335938	0.473741	TRUE	Negative
PCDHGA7	-0.812383	0.0147795	1.83034	0.350892	0.454827	TRUE	Negative
TULP1	-0.810658	0.0102227	1.99043	0.296289	0.528284	TRUE	Negative
ARL14EP	-0.809999	0.0152745	1.81603	0.355548	0.449102	TRUE	Negative
ALS2CR11	-0.809701	0.00888948	2.05112	0.274843	0.560916	TRUE	Negative
COL15A1	-0.809597	0.00953217	2.02081	0.284733	0.545562	TRUE	Negative
SSBP4	-0.808649	0.00804297	2.09458	0.262852	0.580289	TRUE	Negative
SLC10A7	-0.80651	0.00863974	2.0635	0.270496	0.567839	TRUE	Negative
CPXM1	-0.806297	0.0154365	1.81145	0.355548	0.449102	TRUE	Negative
EVC2	-0.80439	0.00937413	2.02807	0.282213	0.549423	TRUE	Negative
UNC80	-0.804195	0.0076272	2.11763	0.256146	0.591513	TRUE	Negative
RIPK4	-0.801563	0.0121143	1.9167	0.321899	0.492281	TRUE	Negative
NAV2	-0.800333	0.0125594	1.90103	0.328841	0.483014	TRUE	Negative
PUM1	-0.798785	0.0187647	1.72666	0.384656	0.414928	TRUE	Negative
STXBP5	-0.797985	0.00983821	2.00708	0.289444	0.538435	TRUE	Negative
CSN2	-0.792831	0.0127536	1.89437	0.330389	0.480974	TRUE	Negative
SLMAP	-0.788114	0.011794	1.92834	0.320541	0.494117	TRUE	Negative
TFAP2C	-0.787882	0.00940408	2.02668	0.282347	0.549216	TRUE	Negative
PPP1R27	-0.7863	0.0122828	1.9107	0.324999	0.488118	TRUE	Negative
FAM13B	-0.784829	0.0197558	1.70431	0.387888	0.411294	TRUE	Negative
PLA2G6	-0.784583	0.015936	1.79762	0.357805	0.446353	TRUE	Negative
TTLL2	-0.784156	0.0108808	1.96334	0.306886	0.513023	TRUE	Negative
ANKRD42	-0.783488	0.0133533	1.87441	0.336308	0.473262	TRUE	Negative
NANOGNB	-0.782505	0.0160107	1.79559	0.358232	0.445836	TRUE	Negative
FBXW7	-0.782152	0.0167174	1.77683	0.367031	0.435297	TRUE	Negative
GABPB1	-0.782036	0.0224549	1.64869	0.398137	0.399968	TRUE	Negative
CDC26	-0.781527	0.010674	1.97167	0.30513	0.515515	TRUE	Negative
ZMAT2	-0.780828	0.0162714	1.78858	0.362218	0.44103	TRUE	Negative
BUB3	-0.780132	0.0152944	1.81547	0.355548	0.449102	TRUE	Negative
FAM47E	-0.778102	0.0108702	1.96376	0.306886	0.513023	TRUE	Negative
MICALL1	-0.777926	0.0100253	1.9989	0.292985	0.533155	TRUE	Negative
SLC30A1	-0.777616	0.0103007	1.98713	0.298059	0.525698	TRUE	Negative
FXYD5	-0.777253	0.012095	1.9174	0.321873	0.492316	TRUE	Negative
SLC38A2	-0.776838	0.0159734	1.7966	0.357853	0.446295	TRUE	Negative
TDO2	-0.775716	0.0229432	1.63935	0.399775	0.398184	TRUE	Negative
HIST1H4D	-0.774859	0.0142987	1.8447	0.346192	0.460683	TRUE	Negative
MROH2A	-0.774325	0.0190814	1.71939	0.385377	0.414114	TRUE	Negative
HTATSF1	-0.772309	0.0206824	1.6844	0.391948	0.406771	TRUE	Negative
DAZAP1	-0.772074	0.01533	1.81446	0.355548	0.449102	TRUE	Negative
PHF20	-0.77171	0.0198322	1.70263	0.388765	0.410313	TRUE	Negative
SOD3	-0.771283	0.0186176	1.73008	0.384656	0.414928	TRUE	Negative
ANGPTL3	-0.770771	0.0130182	1.88545	0.334285	0.475883	TRUE	Negative
SLC17A4	-0.768516	0.0138342	1.85905	0.34223	0.465682	TRUE	Negative
SP2	-0.767433	0.0112564	1.9486	0.313324	0.504007	TRUE	Negative
ZFP36L2	-0.766975	0.0193844	1.71255	0.385581	0.413884	TRUE	Negative
IL5	-0.766777	0.0130525	1.88431	0.334678	0.475373	TRUE	Negative
GFPT1	-0.76619	0.0119003	1.92444	0.320541	0.494117	TRUE	Negative
HEXIM1	-0.764794	0.0158031	1.80126	0.357383	0.446866	TRUE	Negative
ASL	-0.764716	0.0129224	1.88866	0.3328	0.477816	TRUE	Negative
SCGN	-0.764048	0.0205666	1.68684	0.391948	0.406771	TRUE	Negative
ZBED6	-0.76263	0.0193757	1.71274	0.385581	0.413884	TRUE	Negative
DNAJC15	-0.76174	0.0115817	1.93623	0.318341	0.497107	TRUE	Negative
PPIL1	-0.761528	0.0190338	1.72047	0.385377	0.414114	TRUE	Negative
THAP4	-0.760993	0.0220814	1.65597	0.396951	0.401263	TRUE	Negative
NCOA5	-0.760897	0.0129129	1.88898	0.3328	0.477816	TRUE	Negative
MLK4	-0.760509	0.0158446	1.80012	0.357383	0.446866	TRUE	Negative
ENPP4	-0.760485	0.0141115	1.85043	0.345223	0.461901	TRUE	Negative
RNASE13	-0.76033	0.013283	1.87671	0.336308	0.473262	TRUE	Negative
PHLDB3	-0.760264	0.0116043	1.93538	0.318458	0.496947	TRUE	Negative
INTS8	-0.760196	0.0182444	1.73887	0.381028	0.419044	TRUE	Negative
CPED1	-0.760087	0.0153984	1.81253	0.355548	0.449102	TRUE	Negative
BCAT1	-0.759194	0.0111992	1.95081	0.312228	0.505528	TRUE	Negative
PPP1CA	-0.759111	0.0136485	1.86492	0.340002	0.468518	TRUE	Negative
RASAL2	-0.757615	0.0133842	1.87341	0.336308	0.473262	TRUE	Negative
IL12B	-0.757287	0.018641	1.72953	0.384656	0.414928	TRUE	Negative
RBM22	-0.756826	0.0226669	1.64461	0.398876	0.399162	TRUE	Negative
KCTD3	-0.756205	0.0127517	1.89443	0.330389	0.480974	TRUE	Negative
LMNB1	-0.756123	0.018505	1.73271	0.383734	0.41597	TRUE	Negative
GDF15	-0.755138	0.0119106	1.92407	0.320541	0.494117	TRUE	Negative
RNF217	-0.754774	0.0188033	1.72577	0.384656	0.414928	TRUE	Negative
TBC1D13	-0.754723	0.0165312	1.7817	0.36558	0.437018	TRUE	Negative
NOTCH2	-0.753555	0.0132903	1.87646	0.336308	0.473262	TRUE	Negative
CIC	-0.75318	0.0136318	1.86545	0.340002	0.468518	TRUE	Negative
KIAA1279	-0.751842	0.0196408	1.70684	0.386739	0.412582	TRUE	Negative
IL6	-0.75167	0.0133398	1.87485	0.336308	0.473262	TRUE	Negative
C2orf78	-0.749856	0.0214971	1.66762	0.394201	0.404283	TRUE	Negative
CBX4	-0.749552	0.0207452	1.68308	0.391948	0.406771	TRUE	Negative
SPRY2	-0.749257	0.0140289	1.85298	0.345104	0.462051	TRUE	Negative
MPP4	-0.748822	0.0186099	1.73026	0.384656	0.414928	TRUE	Negative
HEMK1	-0.748664	0.0156038	1.80677	0.357383	0.446866	TRUE	Negative
SIGLEC5	-0.74805	0.019713	1.70525	0.387725	0.411476	TRUE	Negative
GNAT1	-0.747601	0.0159118	1.79828	0.357805	0.446353	TRUE	Negative
GLB1L2	-0.747218	0.0173405	1.76094	0.371879	0.429599	TRUE	Negative
RHOBTB2	-0.746522	0.0210023	1.67773	0.392594	0.406056	TRUE	Negative
PPFIBP1	-0.745321	0.0214112	1.66936	0.394201	0.404283	TRUE	Negative
RBPJ	-0.744412	0.0142753	1.84541	0.346192	0.460683	TRUE	Negative
CTNNAL1	-0.742041	0.0178736	1.74779	0.378687	0.421719	TRUE	Negative
LIMD2	-0.741943	0.0177013	1.75199	0.378107	0.422385	TRUE	Negative
GRIN3A	-0.741935	0.0151948	1.8183	0.355	0.449771	TRUE	Negative
C9orf64	-0.741873	0.0207164	1.68369	0.391948	0.406771	TRUE	Negative
GALE	-0.741572	0.0127197	1.89552	0.330389	0.480974	TRUE	Negative
ELK4	-0.739712	0.0180832	1.74273	0.37992	0.420308	TRUE	Negative
STAC	-0.739518	0.022216	1.65333	0.396951	0.401263	TRUE	Negative
SAR1A	-0.738893	0.0172754	1.76257	0.371225	0.430363	TRUE	Negative
KLRG2	-0.738472	0.0155886	1.80719	0.357383	0.446866	TRUE	Negative
FAM106A	-0.738456	0.0139594	1.85513	0.344357	0.462991	TRUE	Negative
LGALS1	-0.737457	0.0179715	1.74542	0.379388	0.420917	TRUE	Negative
SEPW1	-0.736456	0.0149547	1.82522	0.353996	0.451002	TRUE	Negative
PAK1	-0.735856	0.0158303	1.80051	0.357383	0.446866	TRUE	Negative
INCENP	-0.735349	0.0200294	1.69833	0.389156	0.409877	TRUE	Negative
ZFHX4	-0.735075	0.014434	1.84061	0.347761	0.458719	TRUE	Negative
WDR11	-0.734981	0.0211178	1.67535	0.393333	0.40524	TRUE	Negative
CAMTA1	-0.734078	0.0167493	1.776	0.367272	0.435012	TRUE	Negative
GPRC5C	-0.733272	0.0172396	1.76347	0.371073	0.43054	TRUE	Negative
RXFP3	-0.731293	0.0142753	1.84542	0.346192	0.460683	TRUE	Negative
DIS3L2	-0.731264	0.0213487	1.67063	0.394201	0.404283	TRUE	Negative
MARK3	-0.729612	0.0169278	1.7714	0.369243	0.432688	TRUE	Negative
SERPINB3	-0.72835	0.0144847	1.83909	0.34803	0.458384	TRUE	Negative
C1QTNF3	-0.727255	0.0147268	1.83189	0.350491	0.455324	TRUE	Negative
MKRN3	-0.726778	0.0188561	1.72455	0.384656	0.414928	TRUE	Negative
SF3B2	-0.726671	0.0199226	1.70065	0.389012	0.410037	TRUE	Negative
PTN	-0.726091	0.0151375	1.81995	0.355	0.449771	TRUE	Negative
AGER	-0.725969	0.0203034	1.69243	0.391948	0.406771	TRUE	Negative
COX8A	-0.724906	0.0208872	1.68012	0.391948	0.406771	TRUE	Negative
ARL6IP1	-0.724503	0.0208429	1.68104	0.391948	0.406771	TRUE	Negative
CDK5RAP3	-0.723536	0.0197654	1.70409	0.387888	0.411294	TRUE	Negative
HN1L	-0.723233	0.0208468	1.68096	0.391948	0.406771	TRUE	Negative
FAM208B	-0.722769	0.0160491	1.79455	0.358634	0.445349	TRUE	Negative
IL36B	-0.722524	0.0221225	1.65517	0.396951	0.401263	TRUE	Negative
TANC2	-0.721918	0.022535	1.64714	0.398596	0.399467	TRUE	Negative
C1orf85	-0.72134	0.0218768	1.66002	0.395707	0.402627	TRUE	Negative
C18orf8	-0.720907	0.0158382	1.8003	0.357383	0.446866	TRUE	Negative
FAM114A1	-0.719716	0.0170906	1.76724	0.369573	0.432299	TRUE	Negative
ATP1A3	-0.71753	0.0181651	1.74076	0.38073	0.419383	TRUE	Negative
COL3A1	-0.716947	0.0199334	1.70042	0.389012	0.410037	TRUE	Negative
TMEM126B	-0.716698	0.0198872	1.70143	0.389012	0.410037	TRUE	Negative
KIF16B	-0.716465	0.020027	1.69838	0.389156	0.409877	TRUE	Negative
STAR	-0.71538	0.0206341	1.68542	0.391948	0.406771	TRUE	Negative
BTBD11	-0.714956	0.0207323	1.68335	0.391948	0.406771	TRUE	Negative
IPO5	-0.714606	0.0206272	1.68556	0.391948	0.406771	TRUE	Negative
LPP	-0.713752	0.0188414	1.72489	0.384656	0.414928	TRUE	Negative
OR6C68	-0.712785	0.0171027	1.76694	0.369573	0.432299	TRUE	Negative
KPNA7	-0.712211	0.0171068	1.76683	0.369573	0.432299	TRUE	Negative
PRTG	-0.711996	0.0180668	1.74312	0.37992	0.420308	TRUE	Negative
QPCTL	-0.710012	0.0187994	1.72586	0.384656	0.414928	TRUE	Negative
SNX10	-0.70963	0.0228608	1.64091	0.399641	0.39833	TRUE	Negative
SP3	-0.709426	0.016683	1.77772	0.367031	0.435297	TRUE	Negative
CHCHD10	-0.709014	0.0206938	1.68416	0.391948	0.406771	TRUE	Negative
SOX21	-0.704032	0.0200275	1.69837	0.389156	0.409877	TRUE	Negative
PPP1R3D	-0.703724	0.0223795	1.65015	0.397848	0.400283	TRUE	Negative
P4HA2	-0.70339	0.0208741	1.68039	0.391948	0.406771	TRUE	Negative
COL4A4	-0.70185	0.0205116	1.688	0.391948	0.406771	TRUE	Negative
LMOD2	-0.701761	0.0205805	1.68654	0.391948	0.406771	TRUE	Negative
DRD1	-0.701186	0.0187533	1.72692	0.384656	0.414928	TRUE	Negative
ALG3	-0.700742	0.0211801	1.67407	0.393672	0.404866	TRUE	Negative
FXR1	-0.700561	0.0200695	1.69746	0.389504	0.409488	TRUE	Negative
WAS	-0.700426	0.0220129	1.65732	0.396951	0.401263	TRUE	Negative
OR4N2	-0.697142	0.0203334	1.69179	0.391948	0.406771	TRUE	Negative
KCNJ2	-0.696186	0.0228507	1.6411	0.399641	0.39833	TRUE	Negative
SRRD	-0.695639	0.0195183	1.70956	0.385771	0.41367	TRUE	Negative
GNA15	-0.695623	0.0192007	1.71668	0.385418	0.414068	TRUE	Negative
NISCH	-0.693746	0.0218923	1.65971	0.395707	0.402627	TRUE	Negative
ETV1	-0.693294	0.0194251	1.71164	0.385751	0.413693	TRUE	Negative
OR10A5	-0.68869	0.0208064	1.6818	0.391948	0.406771	TRUE	Negative
PTBP3	-0.687995	0.0229273	1.63965	0.399775	0.398184	TRUE	Negative
HHAT	-0.686011	0.0203783	1.69083	0.391948	0.406771	TRUE	Negative
SLC39A14	-0.685946	0.0203502	1.69143	0.391948	0.406771	TRUE	Negative
C16orf52	-0.685672	0.0208744	1.68039	0.391948	0.406771	TRUE	Negative
JAG2	-0.683392	0.0220872	1.65586	0.396951	0.401263	TRUE	Negative
PTPRK	-0.681879	0.022098	1.65565	0.396951	0.401263	TRUE	Negative
TCEA2	-0.680023	0.0228256	1.64158	0.399641	0.39833	TRUE	Negative
ITFG3	-0.678902	0.0218551	1.66045	0.395707	0.402627	TRUE	Negative
SURF4	-0.67628	0.0225994	1.6459	0.398876	0.399162	TRUE	Negative
SIX3	-0.673675	0.0226646	1.64465	0.398876	0.399162	TRUE	Negative

## Sheet: Colchicine_Resistant
9.2nM Colchicine Chemogenomics Screen Resistant Genes
Gene	Differential	pValue	-log(pValue)	FDR	-log(FDR)	Significance	Effect
CCDC101	3.59825	1.99715e-10	9.69959	1.75389e-06	5.756	TRUE	Positive
CCNC	3.16581	8.24054e-10	9.08404	4.82456e-06	5.31654	TRUE	Positive
SRP14	2.76207	1.29489e-06	5.88777	0.000689194	3.16166	TRUE	Positive
RICTOR	2.64187	1.54305e-08	7.81162	3.01134e-05	4.52124	TRUE	Positive
SRP9	2.51343	1.88331e-05	4.72508	0.00489763	2.31001	TRUE	Positive
ATP1A1	2.50733	7.77199e-09	8.10947	1.9501e-05	4.70994	TRUE	Positive
BAZ1B	2.47186	1.41835e-08	7.84822	3.01134e-05	4.52124	TRUE	Positive
WNK1	2.43915	2.17708e-08	7.66213	3.82382e-05	4.4175	TRUE	Positive
LAMTOR5	2.39965	5.9493e-08	7.22553	8.70779e-05	4.06009	TRUE	Positive
CCND3	2.31355	1.56408e-07	6.80574	0.000171697	3.76524	TRUE	Positive
TFDP1	2.29022	2.35683e-07	6.62767	0.000234027	3.63073	TRUE	Positive
VPS52	2.27384	1.51097e-06	5.82075	0.000750058	3.1249	TRUE	Positive
IGBP1	2.25546	9.9525e-07	6.00207	0.000602778	3.21984	TRUE	Positive
MAPKAP1	2.15946	9.58149e-07	6.01857	0.000601033	3.2211	TRUE	Positive
APEX2	2.14206	3.13984e-07	6.50309	0.000290253	3.53722	TRUE	Positive
VPS16	2.12198	1.54591e-07	6.81082	0.000171697	3.76524	TRUE	Positive
TIPRL	2.04226	1.25748e-06	5.9005	0.000689194	3.16166	TRUE	Positive
BRPF1	2.03228	2.31926e-06	5.63465	0.000993547	3.00281	TRUE	Positive
MLST8	2.03168	9.38342e-07	6.02764	0.000601033	3.2211	TRUE	Positive
SCAPER	2.02937	1.52414e-06	5.81697	0.000750058	3.1249	TRUE	Positive
VPS29	1.9801	4.85732e-07	6.3136	0.000376725	3.42398	TRUE	Positive
NUMA1	1.97838	1.90638e-06	5.71979	0.000881148	3.05495	TRUE	Positive
CDK6	1.93288	8.70149e-07	6.06041	0.000601033	3.2211	TRUE	Positive
CDK8	1.9328	1.17245e-06	5.93091	0.000686428	3.1634	TRUE	Positive
TRIP13	1.89972	1.23498e-05	4.90834	0.00349857	2.45611	TRUE	Positive
VPS41	1.89198	1.7432e-05	4.75865	0.00463904	2.33357	TRUE	Positive
VPS18	1.87498	9.3647e-07	6.02851	0.000601033	3.2211	TRUE	Positive
TMEM161B	1.81878	7.9762e-06	5.0982	0.00250168	2.60177	TRUE	Positive
PIGO	1.7917	2.72862e-05	4.56406	0.00614428	2.21153	TRUE	Positive
TADA3	1.7914	2.08958e-05	4.67994	0.00516922	2.28658	TRUE	Positive
ZFYVE20	1.78926	3.15693e-05	4.50074	0.00676198	2.16993	TRUE	Positive
PIK3CB	1.78072	2.94934e-06	5.53027	0.00115116	2.93886	TRUE	Positive
MED26	1.73864	5.06774e-06	5.29519	0.0017802	2.74953	TRUE	Positive
NAPG	1.72684	6.82265e-06	5.16605	0.00217878	2.66179	TRUE	Positive
ZBTB2	1.69695	1.33184e-05	4.87555	0.00371309	2.43026	TRUE	Positive
GOSR2	1.69168	0.000203947	3.69048	0.0269369	1.56965	TRUE	Positive
GMEB2	1.67517	4.50977e-05	4.34585	0.00889995	2.05061	TRUE	Positive
HGS	1.66075	1.00963e-05	4.99584	0.00300563	2.52206	TRUE	Positive
VPS51	1.58901	8.54172e-05	4.06845	0.0144257	1.84086	TRUE	Positive
HNRNPR	1.57899	1.0566e-05	4.97609	0.00309303	2.50962	TRUE	Positive
TRAPPC11	1.56884	0.000245451	3.61003	0.028884	1.53934	TRUE	Positive
SLC16A1	1.56046	3.14763e-05	4.50202	0.00676198	2.16993	TRUE	Positive
C1orf115	1.55094	4.49733e-05	4.34704	0.00889995	2.05061	TRUE	Positive
NAE1	1.5449	2.47979e-05	4.60558	0.00588582	2.23019	TRUE	Positive
TADA2B	1.53927	4.88714e-05	4.31095	0.00943271	2.02536	TRUE	Positive
CDC42	1.53597	0.00103427	2.98537	0.0834043	1.07881	TRUE	Positive
RANBP3	1.52478	0.00920005	2.03621	0.280051	0.552762	TRUE	Positive
RABIF	1.52119	3.57577e-05	4.44663	0.00738881	2.13143	TRUE	Positive
SAMD4B	1.50787	0.00211071	2.67557	0.127397	0.894841	TRUE	Positive
TSSC1	1.5065	5.61055e-05	4.25099	0.0101378	1.99406	TRUE	Positive
ARPC4	1.50396	8.74874e-05	4.05805	0.0146346	1.83462	TRUE	Positive
MED12	1.50345	0.000163019	3.78776	0.0234694	1.6295	TRUE	Positive
FBXW11	1.49057	3.43159e-05	4.4645	0.00726174	2.13896	TRUE	Positive
THRA	1.48253	2.26425e-05	4.64508	0.00544784	2.26378	TRUE	Positive
GATAD2B	1.4613	0.000124981	3.90315	0.0189307	1.72283	TRUE	Positive
DBF4	1.45263	0.000161595	3.79157	0.0234566	1.62973	TRUE	Positive
SERBP1	1.4495	0.000277263	3.55711	0.031407	1.50297	TRUE	Positive
RAB1B	1.44696	0.000141758	3.84845	0.0211004	1.67571	TRUE	Positive
XPO1	1.4466	0.00113353	2.94557	0.0889484	1.05086	TRUE	Positive
VPS54	1.44238	0.000144208	3.84101	0.0211877	1.67392	TRUE	Positive
SMARCD1	1.4355	5.30391e-05	4.2754	0.00991042	2.00391	TRUE	Positive
VPS33A	1.43079	0.000263369	3.57943	0.0300378	1.52233	TRUE	Positive
MALL	1.39766	0.000236931	3.62538	0.0283093	1.54807	TRUE	Positive
TMX2	1.39315	0.000103264	3.98605	0.0164884	1.78282	TRUE	Positive
UBA3	1.39034	0.00116668	2.93305	0.089055	1.05034	TRUE	Positive
HEPH	1.38338	7.22429e-05	4.14121	0.0126887	1.89658	TRUE	Positive
WDR48	1.37336	0.000498787	3.30209	0.0486705	1.31273	TRUE	Positive
SEPHS1	1.35058	0.000144758	3.83936	0.0211877	1.67392	TRUE	Positive
UBE2M	1.34382	0.00412802	2.38426	0.186867	0.728467	TRUE	Positive
RAB1A	1.33657	0.000115204	3.93853	0.0179066	1.74699	TRUE	Positive
PIGC	1.33324	8.46462e-05	4.07239	0.0144257	1.84086	TRUE	Positive
HTT	1.33023	0.000554311	3.25625	0.0526266	1.2788	TRUE	Positive
PRRC2C	1.33005	0.000181764	3.74049	0.0255521	1.59257	TRUE	Positive
SMARCA5	1.32808	0.000106035	3.97455	0.0167783	1.77525	TRUE	Positive
CELF1	1.32231	9.42046e-05	4.02593	0.0154636	1.81069	TRUE	Positive
PRRC2A	1.31685	0.000173858	3.75981	0.0248263	1.60509	TRUE	Positive
KAT2A	1.3122	0.000215883	3.66578	0.0274572	1.56134	TRUE	Positive
YWHAQ	1.30961	0.000217294	3.66295	0.0274572	1.56134	TRUE	Positive
ING3	1.30619	0.00140989	2.85081	0.100256	0.998888	TRUE	Positive
USP1	1.3047	0.000392093	3.40661	0.0414863	1.3821	TRUE	Positive
POLR3A	1.30072	0.00254104	2.59499	0.14233	0.846704	TRUE	Positive
C19orf43	1.30062	0.000256851	3.59032	0.0294858	1.53039	TRUE	Positive
EIF4B	1.27835	0.000643724	3.1913	0.0591957	1.22771	TRUE	Positive
ATP1B3	1.27694	0.000235588	3.62785	0.0283093	1.54807	TRUE	Positive
HELZ	1.27304	0.000222294	3.65307	0.0278883	1.55458	TRUE	Positive
PRDM4	1.26717	0.000280433	3.55217	0.031407	1.50297	TRUE	Positive
CLIP1	1.2668	0.000205862	3.68642	0.0269369	1.56965	TRUE	Positive
TRRAP	1.24627	0.000637512	3.19551	0.0589329	1.22964	TRUE	Positive
GPR107	1.2452	0.0013014	2.88559	0.0948457	1.02298	TRUE	Positive
ZC4H2	1.24245	0.000200409	3.69808	0.0269369	1.56965	TRUE	Positive
KATNB1	1.24141	0.00120112	2.92041	0.0907914	1.04196	TRUE	Positive
TM2D1	1.24108	0.00124522	2.90476	0.0922825	1.03488	TRUE	Positive
CREB1	1.23856	0.000532526	3.27366	0.0513917	1.28911	TRUE	Positive
AKT1	1.23495	0.000822021	3.08512	0.0697487	1.15646	TRUE	Positive
TADA1	1.2342	0.000516258	3.28713	0.050097	1.30019	TRUE	Positive
ZEB1	1.23204	0.000324977	3.48815	0.035234	1.45304	TRUE	Positive
LAMTOR4	1.22445	0.0011244	2.94908	0.0889484	1.05086	TRUE	Positive
MESDC2	1.22084	0.000333688	3.47666	0.0357569	1.44664	TRUE	Positive
FANCI	1.21575	0.000656955	3.18246	0.0597863	1.2234	TRUE	Positive
CDK2	1.2092	0.000306756	3.51321	0.0335779	1.47395	TRUE	Positive
GNPNAT1	1.20579	0.000383833	3.41586	0.0408585	1.38872	TRUE	Positive
TRAPPC13	1.1997	0.000557733	3.25357	0.0526668	1.27846	TRUE	Positive
RPS10	1.19449	0.00399894	2.39806	0.18291	0.737763	TRUE	Positive
RBM14	1.194	0.00101583	2.99318	0.082602	1.08301	TRUE	Positive
EHMT2	1.19267	0.00115627	2.93694	0.089055	1.05034	TRUE	Positive
NCBP1	1.19185	0.00285551	2.54432	0.149268	0.826032	TRUE	Positive
PRKACG	1.18673	0.00647932	2.18847	0.23262	0.633354	TRUE	Positive
YBX1	1.1861	0.00155151	2.80925	0.106448	0.972862	TRUE	Positive
CCNF	1.18388	0.00194283	2.71157	0.122308	0.912546	TRUE	Positive
GMEB1	1.17878	0.0004079	3.38945	0.0429004	1.36754	TRUE	Positive
TFPT	1.17559	0.000925677	3.03354	0.077055	1.1132	TRUE	Positive
NXF1	1.17405	0.00399177	2.39883	0.18291	0.737763	TRUE	Positive
BRIP1	1.17375	0.000413441	3.38359	0.0432243	1.36427	TRUE	Positive
DIAPH2	1.17237	0.000466322	3.33131	0.0472525	1.32558	TRUE	Positive
DSCC1	1.17155	0.00042767	3.36889	0.0442578	1.35401	TRUE	Positive
PPP2R4	1.16277	0.000431571	3.36495	0.0443281	1.35332	TRUE	Positive
CEP97	1.16111	0.00547309	2.26177	0.216508	0.664527	TRUE	Positive
MED7	1.15915	0.00202687	2.69317	0.124826	0.903695	TRUE	Positive
CHAF1A	1.15774	0.0013071	2.88369	0.0948675	1.02288	TRUE	Positive
PCDP1	1.15689	0.00432258	2.36426	0.189804	0.721694	TRUE	Positive
COG3	1.15678	0.00120442	2.91922	0.0907914	1.04196	TRUE	Positive
SLC7A3	1.14097	0.000992221	3.00339	0.0814363	1.08918	TRUE	Positive
DDX41	1.14075	0.00073969	3.13095	0.0646364	1.18952	TRUE	Positive
FANCF	1.137	0.000488905	3.31078	0.0483537	1.31557	TRUE	Positive
NELFE	1.13664	0.000542766	3.26539	0.0518105	1.28558	TRUE	Positive
FZR1	1.13627	0.000869602	3.06068	0.0734312	1.13412	TRUE	Positive
GPI	1.132	0.000890809	3.05022	0.074862	1.12574	TRUE	Positive
PIGB	1.13037	0.00104884	2.97929	0.0841182	1.07511	TRUE	Positive
CYB5R4	1.12808	0.000492787	3.30734	0.0483537	1.31557	TRUE	Positive
PRMT3	1.12491	0.00054147	3.26643	0.0518105	1.28558	TRUE	Positive
POLE4	1.11436	0.000689183	3.16167	0.0617593	1.2093	TRUE	Positive
KEAP1	1.10538	0.00150864	2.82141	0.104734	0.979911	TRUE	Positive
CD164	1.10441	0.00117049	2.93163	0.089055	1.05034	TRUE	Positive
FANCE	1.10303	0.00203129	2.69223	0.124826	0.903695	TRUE	Positive
PSKH2	1.10297	0.00127989	2.89283	0.0940586	1.0266	TRUE	Positive
MTMR9	1.09885	0.00142781	2.84533	0.101086	0.99531	TRUE	Positive
DENR	1.09826	0.000895353	3.04801	0.0748856	1.1256	TRUE	Positive
DHODH	1.09772	0.000967578	3.01431	0.0801629	1.09603	TRUE	Positive
MLLT4	1.09681	0.000715348	3.14548	0.063251	1.19893	TRUE	Positive
FANCL	1.08938	0.00544655	2.26388	0.215944	0.665659	TRUE	Positive
SEC61B	1.08912	0.00122701	2.91115	0.0913184	1.03944	TRUE	Positive
SEC16A	1.08879	0.00138587	2.85828	0.099353	1.00282	TRUE	Positive
RBM41	1.08566	0.00209705	2.67839	0.127009	0.896166	TRUE	Positive
MAPKBP1	1.08443	0.00320063	2.49477	0.161804	0.791011	TRUE	Positive
RERE	1.08217	0.00462426	2.33496	0.198099	0.703118	TRUE	Positive
PCBP1	1.07977	0.00234467	2.62992	0.134581	0.871017	TRUE	Positive
YLPM1	1.07869	0.00161871	2.79083	0.109137	0.962026	TRUE	Positive
PAK3	1.07833	0.00200015	2.69894	0.124745	0.903977	TRUE	Positive
COX6B1	1.0756	0.00229371	2.63946	0.133074	0.875906	TRUE	Positive
RHOA	1.07529	0.0010139	2.99401	0.082602	1.08301	TRUE	Positive
GATC	1.07298	0.00239301	2.62106	0.136022	0.86639	TRUE	Positive
PIGF	1.07224	0.00167034	2.77719	0.111	0.954677	TRUE	Positive
ZNF790	1.0671	0.00146573	2.83395	0.102566	0.988996	TRUE	Positive
RPS25	1.06304	0.00171226	2.76643	0.112217	0.949942	TRUE	Positive
TAF5L	1.05991	0.00175808	2.75496	0.114791	0.940091	TRUE	Positive
UBA1	1.05981	0.00342214	2.4657	0.166962	0.777382	TRUE	Positive
FANCG	1.05426	0.00114418	2.94151	0.0889484	1.05086	TRUE	Positive
ATP6AP1	1.05134	0.001562	2.80632	0.106751	0.971629	TRUE	Positive
E2F4	1.04755	0.00129988	2.8861	0.0948457	1.02298	TRUE	Positive
NRBP1	1.04744	0.00126215	2.89889	0.0931448	1.03084	TRUE	Positive
USP37	1.04636	0.0215435	1.66668	0.394201	0.404283	TRUE	Positive
ZNF630	1.04084	0.00114452	2.94138	0.0889484	1.05086	TRUE	Positive
PSMD2	1.03284	0.00567998	2.24565	0.217588	0.662365	TRUE	Positive
MCM10	1.031	0.00660949	2.17983	0.234331	0.630171	TRUE	Positive
FASN	1.0297	0.00261555	2.58244	0.142471	0.846274	TRUE	Positive
PLEKHM3	1.02544	0.00556974	2.25416	0.217029	0.663483	TRUE	Positive
AIFM1	1.02528	0.00461087	2.33622	0.198008	0.703317	TRUE	Positive
DHX36	1.02247	0.0026288	2.58024	0.142471	0.846274	TRUE	Positive
KIAA1432	1.02107	0.00162178	2.79001	0.109137	0.962026	TRUE	Positive
PLEKHG2	1.01884	0.00155099	2.80939	0.106448	0.972862	TRUE	Positive
SAP30	1.01856	0.00131666	2.88053	0.0951681	1.02151	TRUE	Positive
EIF3H	1.01552	0.0205064	1.68811	0.391948	0.406771	TRUE	Positive
CTNNA1	1.00834	0.00259013	2.58668	0.14233	0.846704	TRUE	Positive
PPARGC1B	1.00798	0.00331804	2.47912	0.1653	0.781728	TRUE	Positive
ZC3H7A	1.00691	0.00257468	2.58928	0.14233	0.846704	TRUE	Positive
UVRAG	1.00448	0.00393778	2.40475	0.18283	0.737953	TRUE	Positive
KIAA1210	1.00406	0.00136222	2.86575	0.0980575	1.00852	TRUE	Positive
WDR44	1.00149	0.00161491	2.79185	0.109137	0.962026	TRUE	Positive
FBXO5	1.00002	0.00542412	2.26567	0.215944	0.665659	TRUE	Positive
STARD8	1.00002	0.00260122	2.58482	0.14233	0.846704	TRUE	Positive
UBR2	0.999606	0.00208603	2.68068	0.126779	0.896954	TRUE	Positive
C8G	0.99801	0.00305042	2.51564	0.157581	0.802496	TRUE	Positive
CHM	0.997539	0.00220461	2.65667	0.130161	0.885518	TRUE	Positive
OR13H1	0.995464	0.00199397	2.70028	0.124745	0.903977	TRUE	Positive
BMS1	0.99522	0.00259632	2.58564	0.14233	0.846704	TRUE	Positive
UNC50	0.99508	0.0026311	2.57986	0.142471	0.846274	TRUE	Positive
RCC2	0.991467	0.00808154	2.09251	0.26286	0.580276	TRUE	Positive
PSMD12	0.990852	0.00397221	2.40097	0.18291	0.737763	TRUE	Positive
DENND6A	0.99051	0.0033442	2.47571	0.165458	0.781313	TRUE	Positive
RFWD3	0.990249	0.00273131	2.56363	0.14558	0.836899	TRUE	Positive
PSMD11	0.989755	0.0021451	2.66855	0.128243	0.891965	TRUE	Positive
RMND5A	0.986576	0.00179853	2.74508	0.116566	0.933428	TRUE	Positive
OGT	0.986523	0.00631933	2.19933	0.231235	0.635947	TRUE	Positive
KIAA2022	0.985544	0.00890375	2.05043	0.274843	0.560916	TRUE	Positive
MED18	0.985476	0.00505161	2.29657	0.206822	0.684404	TRUE	Positive
ZC3H12B	0.98492	0.00205828	2.6865	0.125665	0.900786	TRUE	Positive
ICMT	0.984838	0.00450071	2.34672	0.196394	0.706873	TRUE	Positive
NAP1L4	0.983037	0.00341189	2.46701	0.166926	0.777476	TRUE	Positive
HMSD	0.98153	0.0193247	1.71389	0.385581	0.413884	TRUE	Positive
SHMT2	0.97368	0.00185661	2.73128	0.118666	0.925675	TRUE	Positive
KDM1A	0.970153	0.00339341	2.46936	0.166646	0.778205	TRUE	Positive
TRAPPC3	0.969544	0.0127189	1.89555	0.330389	0.480974	TRUE	Positive
SNAP23	0.965694	0.00239127	2.62137	0.136022	0.86639	TRUE	Positive
GINS4	0.960546	0.00371231	2.43036	0.175749	0.755107	TRUE	Positive
DHRS7C	0.959745	0.00389347	2.40966	0.18283	0.737953	TRUE	Positive
CRKL	0.956235	0.00478845	2.3198	0.201471	0.695788	TRUE	Positive
TPST2	0.956026	0.00220025	2.65753	0.130161	0.885518	TRUE	Positive
SF3B5	0.951299	0.00958481	2.01842	0.285335	0.544645	TRUE	Positive
ZNF777	0.950918	0.00847907	2.07165	0.268336	0.571321	TRUE	Positive
GEN1	0.950568	0.00378542	2.42189	0.178729	0.747805	TRUE	Positive
AHI1	0.950359	0.00849746	2.07071	0.268434	0.571162	TRUE	Positive
GPAA1	0.948985	0.0145098	1.83834	0.348155	0.458227	TRUE	Positive
PSPC1	0.948777	0.0151993	1.81818	0.355	0.449771	TRUE	Positive
CFL1	0.948511	0.00280176	2.55257	0.147778	0.830389	TRUE	Positive
TASP1	0.945948	0.00610994	2.21396	0.227995	0.642074	TRUE	Positive
MRPS5	0.945589	0.00631448	2.19966	0.231235	0.635947	TRUE	Positive
PIM2	0.945068	0.00275279	2.56023	0.145632	0.836742	TRUE	Positive
TAF13	0.944958	0.00390379	2.40851	0.18283	0.737953	TRUE	Positive
DLG3	0.940805	0.0066562	2.17677	0.234758	0.62938	TRUE	Positive
UBALD1	0.94059	0.00258084	2.58824	0.14233	0.846704	TRUE	Positive
MPV17	0.940408	0.00584169	2.23346	0.222567	0.652539	TRUE	Positive
UBE2F	0.937682	0.00295633	2.52925	0.153171	0.814823	TRUE	Positive
LMO7	0.936853	0.0191641	1.71751	0.385377	0.414114	TRUE	Positive
PIGA	0.93457	0.0141323	1.84979	0.345223	0.461901	TRUE	Positive
RAB2A	0.934195	0.00333875	2.47642	0.165458	0.781313	TRUE	Positive
EXOC1	0.933472	0.00465071	2.33248	0.198747	0.701699	TRUE	Positive
CCDC22	0.933047	0.00324058	2.48938	0.162957	0.787927	TRUE	Positive
NOVA2	0.932145	0.00424776	2.37184	0.189191	0.7231	TRUE	Positive
ALG2	0.931615	0.00586904	2.23143	0.222725	0.65223	TRUE	Positive
GAST	0.929514	0.0137934	1.86033	0.342186	0.465737	TRUE	Positive
MYRF	0.927872	0.00324726	2.48848	0.162957	0.787927	TRUE	Positive
KDM5C	0.927361	0.00480543	2.31827	0.201471	0.695788	TRUE	Positive
ZSCAN21	0.927345	0.0080662	2.09333	0.262852	0.580289	TRUE	Positive
ELP6	0.925708	0.00825437	2.08332	0.265531	0.575885	TRUE	Positive
ODC1	0.925305	0.00455733	2.34129	0.196876	0.705806	TRUE	Positive
PJA1	0.919495	0.00855243	2.06791	0.268721	0.570699	TRUE	Positive
NR2C1	0.919438	0.00804238	2.09462	0.262852	0.580289	TRUE	Positive
PPME1	0.918707	0.00339668	2.46895	0.166646	0.778205	TRUE	Positive
SNTG1	0.917998	0.00429043	2.3675	0.189407	0.722605	TRUE	Positive
USP8	0.917439	0.00810215	2.0914	0.263043	0.579974	TRUE	Positive
MATN4	0.916348	0.00830183	2.08083	0.266083	0.574983	TRUE	Positive
KAT6A	0.915812	0.00404326	2.39327	0.184456	0.734106	TRUE	Positive
FBP1	0.915726	0.00554245	2.2563	0.217029	0.663483	TRUE	Positive
CCDC33	0.915598	0.022204	1.65357	0.396951	0.401263	TRUE	Positive
IRS4	0.915031	0.00789113	2.10286	0.262689	0.580559	TRUE	Positive
TXLNG	0.912524	0.00344415	2.46292	0.167571	0.775801	TRUE	Positive
TEX11	0.9113	0.00697685	2.15634	0.243433	0.613621	TRUE	Positive
ARHGEF9	0.910114	0.00674644	2.17093	0.236989	0.625272	TRUE	Positive
VPS45	0.909192	0.00496792	2.30383	0.204348	0.68963	TRUE	Positive
MAX	0.909013	0.00423309	2.37334	0.189191	0.7231	TRUE	Positive
C17orf70	0.908947	0.00652545	2.18539	0.232797	0.633024	TRUE	Positive
EHBP1	0.907232	0.00396794	2.40143	0.18291	0.737763	TRUE	Positive
NACC1	0.906836	0.0140728	1.85162	0.345223	0.461901	TRUE	Positive
MPV17L	0.906501	0.00644784	2.19059	0.232533	0.633515	TRUE	Positive
MED11	0.906383	0.0118351	1.92683	0.320541	0.494117	TRUE	Positive
VSIG4	0.906214	0.00363854	2.43907	0.173191	0.761476	TRUE	Positive
ACD	0.905068	0.00339447	2.46923	0.166646	0.778205	TRUE	Positive
GTF2E2	0.902541	0.0117988	1.92816	0.320541	0.494117	TRUE	Positive
AZIN1	0.902363	0.00394514	2.40394	0.18283	0.737953	TRUE	Positive
MED1	0.900275	0.00613994	2.21184	0.227995	0.642074	TRUE	Positive
SLU7	0.899908	0.0114262	1.9421	0.314846	0.501902	TRUE	Positive
EIF2AK1	0.899861	0.00559747	2.25201	0.217029	0.663483	TRUE	Positive
FDFT1	0.899607	0.00660875	2.17988	0.234331	0.630171	TRUE	Positive
WDR25	0.899465	0.00691497	2.16021	0.241941	0.61629	TRUE	Positive
ATG4A	0.898194	0.00507555	2.29452	0.207318	0.683362	TRUE	Positive
MTM1	0.896395	0.00471798	2.32624	0.200201	0.698534	TRUE	Positive
ALDH3B2	0.89488	0.013306	1.87595	0.336308	0.473262	TRUE	Positive
ARID3B	0.894017	0.00448256	2.34847	0.196339	0.706994	TRUE	Positive
UPF1	0.892272	0.0164598	1.78358	0.365487	0.437129	TRUE	Positive
CHMP5	0.889762	0.00931699	2.03072	0.282213	0.549423	TRUE	Positive
PKN2	0.889134	0.0157643	1.80233	0.357383	0.446866	TRUE	Positive
CDK10	0.888601	0.0125067	1.90286	0.328353	0.48366	TRUE	Positive
OR1E1	0.888145	0.00551285	2.25862	0.217029	0.663483	TRUE	Positive
TPSAB1	0.885199	0.00555367	2.25542	0.217029	0.663483	TRUE	Positive
CDK4	0.882684	0.0109028	1.96246	0.306886	0.513023	TRUE	Positive
PLS3	0.882638	0.0156193	1.80634	0.357383	0.446866	TRUE	Positive
FCGBP	0.880326	0.0165473	1.78127	0.36558	0.437018	TRUE	Positive
GDPD2	0.880287	0.008037	2.09491	0.262852	0.580289	TRUE	Positive
RAD51D	0.879053	0.00430022	2.36651	0.189407	0.722605	TRUE	Positive
RRP7A	0.878202	0.0193773	1.71271	0.385581	0.413884	TRUE	Positive
PHF8	0.877839	0.00915952	2.03813	0.279302	0.553926	TRUE	Positive
PTPN23	0.877334	0.0048535	2.31395	0.201529	0.695662	TRUE	Positive
VPS25	0.875776	0.0194588	1.71088	0.385751	0.413693	TRUE	Positive
FTHL17	0.875568	0.0071054	2.14841	0.246152	0.608796	TRUE	Positive
MAST2	0.874179	0.00523687	2.28093	0.211936	0.673794	TRUE	Positive
SRPRB	0.872528	0.0066174	2.17931	0.234331	0.630171	TRUE	Positive
TMEM106C	0.872459	0.00471892	2.32616	0.200201	0.698534	TRUE	Positive
NDRG3	0.871943	0.00556384	2.25463	0.217029	0.663483	TRUE	Positive
ARL1	0.870625	0.0122894	1.91047	0.324999	0.488118	TRUE	Positive
MYL5	0.870132	0.00911571	2.04021	0.278449	0.555254	TRUE	Positive
TCEAL7	0.869875	0.0104003	1.98296	0.299195	0.524045	TRUE	Positive
RFC3	0.869457	0.0136017	1.86641	0.339831	0.468737	TRUE	Positive
MCM3	0.869011	0.00993109	2.003	0.291202	0.535806	TRUE	Positive
VCP	0.867978	0.0201193	1.69639	0.389952	0.408989	TRUE	Positive
PIM3	0.867213	0.00815915	2.08835	0.263918	0.578531	TRUE	Positive
BRD2	0.865863	0.00840188	2.07562	0.268336	0.571321	TRUE	Positive
MGA	0.863791	0.00689463	2.16149	0.241711	0.616703	TRUE	Positive
CXorf57	0.862951	0.0183958	1.73528	0.383089	0.4167	TRUE	Positive
TENM1	0.862615	0.00821606	2.08534	0.264783	0.57711	TRUE	Positive
SUFU	0.860876	0.0084667	2.07229	0.268336	0.571321	TRUE	Positive
EFNA5	0.858122	0.01298	1.88673	0.333793	0.476523	TRUE	Positive
CDC6	0.854941	0.0216433	1.66468	0.394339	0.40413	TRUE	Positive
MTX2	0.852533	0.00627891	2.20212	0.230717	0.63692	TRUE	Positive
RAC1	0.848901	0.00845579	2.07285	0.268336	0.571321	TRUE	Positive
PDCD2L	0.848758	0.00789681	2.10255	0.262689	0.580559	TRUE	Positive
HNRNPA0	0.847397	0.00867576	2.06169	0.271141	0.566805	TRUE	Positive
RNF145	0.847285	0.00814999	2.08884	0.263918	0.578531	TRUE	Positive
COG4	0.844886	0.00721296	2.14189	0.248409	0.604833	TRUE	Positive
UNC45A	0.844222	0.00977596	2.00984	0.289066	0.539004	TRUE	Positive
GNA12	0.844193	0.00829949	2.08095	0.266083	0.574983	TRUE	Positive
BEX4	0.843303	0.0137313	1.86229	0.341126	0.467085	TRUE	Positive
ST18	0.842567	0.00555563	2.25527	0.217029	0.663483	TRUE	Positive
HIST1H4C	0.840092	0.0181332	1.74153	0.380515	0.419628	TRUE	Positive
P2RY4	0.839941	0.00623445	2.2052	0.229564	0.639097	TRUE	Positive
ZMYM3	0.837376	0.0107963	1.96672	0.306839	0.513089	TRUE	Positive
MIOS	0.835505	0.00653431	2.1848	0.232797	0.633024	TRUE	Positive
RRAGA	0.834742	0.00789321	2.10275	0.262689	0.580559	TRUE	Positive
FANCA	0.833359	0.00801199	2.09626	0.262852	0.580289	TRUE	Positive
MBD3	0.83335	0.0120083	1.92052	0.321026	0.49346	TRUE	Positive
ARHGEF37	0.832086	0.00855036	2.06802	0.268721	0.570699	TRUE	Positive
SNX33	0.830987	0.0191033	1.71889	0.385377	0.414114	TRUE	Positive
SMG5	0.82867	0.0133005	1.87613	0.336308	0.473262	TRUE	Positive
TRIM66	0.828603	0.0227268	1.64346	0.399174	0.398838	TRUE	Positive
CAPN5	0.826591	0.0107558	1.96836	0.30668	0.513314	TRUE	Positive
FOXM1	0.824939	0.00702317	2.15347	0.244267	0.612135	TRUE	Positive
CD8B	0.824493	0.0150411	1.82272	0.355	0.449771	TRUE	Positive
MTA1	0.824359	0.00751277	2.1242	0.253758	0.59558	TRUE	Positive
ERCC3	0.82385	0.0149941	1.82408	0.354451	0.450444	TRUE	Positive
GAREML	0.821532	0.0109007	1.96255	0.306886	0.513023	TRUE	Positive
RECQL5	0.821124	0.0133108	1.8758	0.336308	0.473262	TRUE	Positive
PIWIL3	0.820632	0.0191014	1.71894	0.385377	0.414114	TRUE	Positive
ADIPOR1	0.819596	0.013367	1.87397	0.336308	0.473262	TRUE	Positive
DEGS1	0.818948	0.0146601	1.83386	0.350347	0.455501	TRUE	Positive
DYDC2	0.817754	0.0101567	1.99325	0.294862	0.530381	TRUE	Positive
NBAS	0.815543	0.0120294	1.91976	0.321031	0.493454	TRUE	Positive
BRD7	0.814533	0.0213919	1.66975	0.394201	0.404283	TRUE	Positive
TMEM185A	0.813996	0.0100642	1.99722	0.293633	0.532195	TRUE	Positive
FANCD2	0.813875	0.00895648	2.04786	0.275502	0.559875	TRUE	Positive
MCM9	0.813107	0.0151943	1.81832	0.355	0.449771	TRUE	Positive
CCDC54	0.813043	0.0140199	1.85325	0.345104	0.462051	TRUE	Positive
WDR20	0.811872	0.00820574	2.08588	0.264783	0.57711	TRUE	Positive
BEND3	0.810882	0.0138162	1.85961	0.34223	0.465682	TRUE	Positive
P2RX1	0.810387	0.012485	1.90361	0.328353	0.48366	TRUE	Positive
ELAVL1	0.809861	0.0142301	1.84679	0.346192	0.460683	TRUE	Positive
PHKA1	0.80835	0.0226872	1.64422	0.398876	0.399162	TRUE	Positive
CA14	0.806382	0.0184333	1.7344	0.383151	0.41663	TRUE	Positive
ZC2HC1A	0.806088	0.0136667	1.86434	0.340002	0.468518	TRUE	Positive
CXCR3	0.805163	0.00894837	2.04826	0.275502	0.559875	TRUE	Positive
PSMC3	0.80489	0.0165288	1.78176	0.36558	0.437018	TRUE	Positive
KCNJ14	0.804425	0.0224864	1.64808	0.398137	0.399968	TRUE	Positive
OXSR1	0.804171	0.00996496	2.00152	0.291708	0.535052	TRUE	Positive
KBTBD2	0.804076	0.0108352	1.96516	0.306886	0.513023	TRUE	Positive
ELMOD3	0.803707	0.0150999	1.82103	0.355	0.449771	TRUE	Positive
SRBD1	0.802306	0.0196119	1.70748	0.386603	0.412735	TRUE	Positive
MUM1L1	0.801498	0.015438	1.81141	0.355548	0.449102	TRUE	Positive
CCS	0.800944	0.0150746	1.82175	0.355	0.449771	TRUE	Positive
DGCR14	0.800812	0.0172025	1.76441	0.371033	0.430587	TRUE	Positive
FANCC	0.799769	0.0194981	1.71001	0.385771	0.41367	TRUE	Positive
CORO6	0.799095	0.0177914	1.74979	0.378107	0.422385	TRUE	Positive
PINK1	0.797236	0.0214981	1.6676	0.394201	0.404283	TRUE	Positive
AMICA1	0.796857	0.0215603	1.66635	0.394201	0.404283	TRUE	Positive
OLAH	0.794439	0.010938	1.96106	0.307373	0.512334	TRUE	Positive
KLF4	0.79355	0.0154176	1.81198	0.355548	0.449102	TRUE	Positive
FAM49A	0.790793	0.0186875	1.72845	0.384656	0.414928	TRUE	Positive
TCP10L	0.790608	0.012306	1.90988	0.324999	0.488118	TRUE	Positive
PIGK	0.788992	0.0181961	1.74002	0.380925	0.419161	TRUE	Positive
CAP1	0.788405	0.0214596	1.66838	0.394201	0.404283	TRUE	Positive
DRAP1	0.787211	0.0222042	1.65357	0.396951	0.401263	TRUE	Positive
COLGALT2	0.787058	0.015408	1.81225	0.355548	0.449102	TRUE	Positive
LRRC71	0.786622	0.0150848	1.82146	0.355	0.449771	TRUE	Positive
WRB	0.786384	0.0135283	1.86876	0.338487	0.470458	TRUE	Positive
KIAA0100	0.785849	0.00985967	2.00614	0.289591	0.538216	TRUE	Positive
BRE	0.785395	0.00932254	2.03047	0.282213	0.549423	TRUE	Positive
FAU	0.784909	0.0113324	1.94568	0.313452	0.503829	TRUE	Positive
PALLD	0.784781	0.00972543	2.01209	0.288056	0.540523	TRUE	Positive
FAM9C	0.784261	0.0191102	1.71874	0.385377	0.414114	TRUE	Positive
BRD9	0.783866	0.0151666	1.81911	0.355	0.449771	TRUE	Positive
CPOX	0.78269	0.0141077	1.85054	0.345223	0.461901	TRUE	Positive
HIPK2	0.782432	0.012045	1.91919	0.321031	0.493454	TRUE	Positive
GOLM1	0.781938	0.0119082	1.92415	0.320541	0.494117	TRUE	Positive
LGR5	0.78072	0.0113188	1.9462	0.313452	0.503829	TRUE	Positive
SSH2	0.780701	0.0168568	1.77323	0.368413	0.433665	TRUE	Positive
C14orf159	0.779988	0.0103722	1.98413	0.299195	0.524045	TRUE	Positive
CXorf48	0.778086	0.0141517	1.84919	0.345223	0.461901	TRUE	Positive
SATL1	0.777272	0.0126034	1.89951	0.328841	0.483014	TRUE	Positive
RAB34	0.777091	0.0154847	1.8101	0.355986	0.448567	TRUE	Positive
AP3B1	0.776848	0.0126189	1.89898	0.328841	0.483014	TRUE	Positive
FUNDC2	0.775735	0.0199945	1.69909	0.389156	0.409877	TRUE	Positive
RSPO3	0.775128	0.0116222	1.93471	0.318458	0.496947	TRUE	Positive
C10orf95	0.773585	0.0111154	1.95408	0.310382	0.508103	TRUE	Positive
BLMH	0.772417	0.0108204	1.96575	0.306886	0.513023	TRUE	Positive
TM2D2	0.771813	0.0218986	1.65958	0.395707	0.402627	TRUE	Positive
FAM104A	0.770953	0.0123235	1.90927	0.324999	0.488118	TRUE	Positive
MRPS28	0.770387	0.0135287	1.86874	0.338487	0.470458	TRUE	Positive
CAB39	0.769935	0.0168643	1.77303	0.368413	0.433665	TRUE	Positive
GTF2E1	0.769363	0.0172889	1.76223	0.371225	0.430363	TRUE	Positive
EWSR1	0.769277	0.0128984	1.88946	0.3328	0.477816	TRUE	Positive
GSPT2	0.768541	0.0180223	1.74419	0.37992	0.420308	TRUE	Positive
APC2	0.767896	0.0125787	1.90036	0.328841	0.483014	TRUE	Positive
DNMT3A	0.767643	0.0154244	1.81179	0.355548	0.449102	TRUE	Positive
MYNN	0.767281	0.0109551	1.96038	0.307373	0.512334	TRUE	Positive
PIN4	0.766127	0.0119975	1.92091	0.321026	0.49346	TRUE	Positive
TTC30B	0.764849	0.0223421	1.65088	0.397584	0.400571	TRUE	Positive
P2RY10	0.763806	0.0110699	1.95586	0.309605	0.509191	TRUE	Positive
STYXL1	0.763793	0.0191767	1.71723	0.385377	0.414114	TRUE	Positive
RGP1	0.763513	0.0157093	1.80384	0.357383	0.446866	TRUE	Positive
EIF4H	0.763482	0.0131359	1.88154	0.335837	0.473872	TRUE	Positive
MAP3K11	0.763067	0.0188307	1.72513	0.384656	0.414928	TRUE	Positive
MAGEC3	0.761651	0.014331	1.84372	0.346192	0.460683	TRUE	Positive
SLC25A14	0.76101	0.0168075	1.7745	0.368089	0.434047	TRUE	Positive
CPD	0.760984	0.0118517	1.92622	0.320541	0.494117	TRUE	Positive
DENND5A	0.760932	0.0177045	1.75192	0.378107	0.422385	TRUE	Positive
SLC16A10	0.758994	0.0159347	1.79766	0.357805	0.446353	TRUE	Positive
YIPF5	0.758667	0.0143124	1.84429	0.346192	0.460683	TRUE	Positive
TGM7	0.755816	0.0134665	1.87075	0.337893	0.47122	TRUE	Positive
KIF2A	0.755096	0.0199158	1.7008	0.389012	0.410037	TRUE	Positive
C2orf53	0.753859	0.0166845	1.77769	0.367031	0.435297	TRUE	Positive
SMG9	0.753604	0.0178048	1.74946	0.378107	0.422385	TRUE	Positive
GRAMD2	0.753406	0.0157222	1.80349	0.357383	0.446866	TRUE	Positive
CENPJ	0.752519	0.0172166	1.76405	0.371033	0.430587	TRUE	Positive
PARP1	0.752261	0.0207427	1.68314	0.391948	0.406771	TRUE	Positive
RHOB	0.751999	0.0184845	1.73319	0.383734	0.41597	TRUE	Positive
MGLL	0.750285	0.0222003	1.65364	0.396951	0.401263	TRUE	Positive
DUS1L	0.750126	0.0169877	1.76986	0.369573	0.432299	TRUE	Positive
MGARP	0.749098	0.0144781	1.83929	0.34803	0.458384	TRUE	Positive
CCDC115	0.746979	0.0192737	1.71503	0.385544	0.413926	TRUE	Positive
FAM178A	0.744061	0.0194456	1.71118	0.385751	0.413693	TRUE	Positive
GUCY2F	0.743518	0.0183979	1.73523	0.383089	0.4167	TRUE	Positive
GOSR1	0.743134	0.0205921	1.6863	0.391948	0.406771	TRUE	Positive
TSPYL2	0.741969	0.0182239	1.73936	0.381028	0.419044	TRUE	Positive
CCDC14	0.740997	0.018529	1.73215	0.383778	0.41592	TRUE	Positive
C1orf112	0.740949	0.0178219	1.74905	0.378107	0.422385	TRUE	Positive
OR51L1	0.739954	0.0214442	1.66869	0.394201	0.404283	TRUE	Positive
ASCL5	0.739807	0.0191456	1.71793	0.385377	0.414114	TRUE	Positive
CRK	0.738777	0.0169443	1.77098	0.369243	0.432688	TRUE	Positive
TOR1AIP2	0.73869	0.0205534	1.68712	0.391948	0.406771	TRUE	Positive
UBE3A	0.738652	0.0145981	1.8357	0.349797	0.456184	TRUE	Positive
CTBP2	0.738591	0.017943	1.7461	0.379388	0.420917	TRUE	Positive
PDLIM7	0.738182	0.0177605	1.75054	0.378107	0.422385	TRUE	Positive
TOX4	0.738006	0.0148755	1.82753	0.352596	0.452722	TRUE	Positive
CEP250	0.737768	0.0143491	1.84317	0.346192	0.460683	TRUE	Positive
HNF4A	0.737062	0.018845	1.7248	0.384656	0.414928	TRUE	Positive
CCT3	0.736951	0.0205413	1.68737	0.391948	0.406771	TRUE	Positive
NCOA2	0.734217	0.0189122	1.72326	0.384906	0.414645	TRUE	Positive
BCL11B	0.733249	0.0157904	1.80161	0.357383	0.446866	TRUE	Positive
SOWAHD	0.732512	0.0165123	1.78219	0.36558	0.437018	TRUE	Positive
TRAFD1	0.732175	0.0191301	1.71828	0.385377	0.414114	TRUE	Positive
RCOR2	0.731339	0.0215774	1.666	0.394201	0.404283	TRUE	Positive
SNN	0.730623	0.0195628	1.70857	0.386069	0.413336	TRUE	Positive
MATN3	0.730262	0.0204638	1.68901	0.391948	0.406771	TRUE	Positive
RAB10	0.729611	0.0177925	1.74976	0.378107	0.422385	TRUE	Positive
ADRM1	0.729531	0.0167079	1.77708	0.367031	0.435297	TRUE	Positive
NUP160	0.728598	0.0146809	1.83325	0.350347	0.455501	TRUE	Positive
TRAPPC2L	0.728361	0.0174782	1.7575	0.374374	0.426694	TRUE	Positive
NCOA1	0.726883	0.0211808	1.67406	0.393672	0.404866	TRUE	Positive
CLEC4F	0.723031	0.0223186	1.65133	0.397584	0.400571	TRUE	Positive
POLRMT	0.722102	0.0165743	1.78056	0.365718	0.436853	TRUE	Positive
GDF10	0.721467	0.0217762	1.66202	0.395707	0.402627	TRUE	Positive
XKR4	0.720442	0.0226242	1.64543	0.398876	0.399162	TRUE	Positive
OPHN1	0.719223	0.0180606	1.74327	0.37992	0.420308	TRUE	Positive
REPS1	0.718987	0.0192948	1.71456	0.385544	0.413926	TRUE	Positive
LUZP4	0.718617	0.0195258	1.70939	0.385771	0.41367	TRUE	Positive
GDF11	0.718482	0.0212348	1.67295	0.393842	0.404678	TRUE	Positive
DCAF8L2	0.714533	0.0214697	1.66817	0.394201	0.404283	TRUE	Positive
PNISR	0.713909	0.0228672	1.64079	0.399641	0.39833	TRUE	Positive
CEP85L	0.712151	0.0223327	1.65106	0.397584	0.400571	TRUE	Positive
FUT11	0.710939	0.0218946	1.65966	0.395707	0.402627	TRUE	Positive
TEX22	0.710633	0.0178247	1.74898	0.378107	0.422385	TRUE	Positive
GRM7	0.710225	0.0189056	1.72341	0.384906	0.414645	TRUE	Positive
KDSR	0.707942	0.0216682	1.66418	0.394384	0.404081	TRUE	Positive
KMT2A	0.706954	0.0210558	1.67663	0.392594	0.406056	TRUE	Positive
L3MBTL2	0.70556	0.0228981	1.6402	0.399775	0.398184	TRUE	Positive
DLX6	0.705525	0.022474	1.64832	0.398137	0.399968	TRUE	Positive
THNSL2	0.705006	0.0208302	1.68131	0.391948	0.406771	TRUE	Positive
CELSR2	0.704809	0.0186782	1.72866	0.384656	0.414928	TRUE	Positive
SYP	0.702201	0.0210156	1.67746	0.392594	0.406056	TRUE	Positive
KIAA1407	0.701646	0.0192918	1.71463	0.385544	0.413926	TRUE	Positive
MAP3K10	0.700708	0.0213514	1.67057	0.394201	0.404283	TRUE	Positive
KIAA0586	0.700066	0.0209497	1.67882	0.392522	0.406136	TRUE	Positive
AP1M1	0.699736	0.0191463	1.71792	0.385377	0.414114	TRUE	Positive
FAM195A	0.696016	0.0215908	1.66573	0.394201	0.404283	TRUE	Positive
SAE1	0.694841	0.0190684	1.71969	0.385377	0.414114	TRUE	Positive
ZNF419	0.692266	0.0210368	1.67702	0.392594	0.406056	TRUE	Positive
DNAJC13	0.692002	0.0224363	1.64905	0.398137	0.399968	TRUE	Positive
MCEE	0.69029	0.0227611	1.64281	0.399377	0.398617	TRUE	Positive
FAM131B	0.683583	0.0221386	1.65485	0.396951	0.401263	TRUE	Positive
RRP1B	0.680432	0.0219936	1.6577	0.396951	0.401263	TRUE	Positive
DIP2A	0.680251	0.0216224	1.6651	0.394339	0.40413	TRUE	Positive
SLC39A10	0.675362	0.0226651	1.64464	0.398876	0.399162	TRUE	Positive

## Sheet: Palbociclib_Sensitive
0.7µM Palbociclib Chemogenomics Screen Sensitive Genes
Gene	Differential	pValue	-log(pValue)	FDR	-log(FDR)	Significant?	Effect
MYH9	-2.5684	0.000108014	3.96652	0.0160776	1.79378	TRUE	Negative
CCNE1	-2.34088	2.62642e-06	5.58064	0.00144158	2.84116	TRUE	Negative
FBXO11	-1.95607	1.14609e-05	4.94078	0.00405706	2.39179	TRUE	Negative
UBE2G1	-1.94496	6.89583e-06	5.16141	0.0028167	2.55026	TRUE	Negative
CELF1	-1.85932	4.42995e-06	5.3536	0.00210291	2.67718	TRUE	Negative
FAM122A	-1.85181	0.000186776	3.72868	0.0231023	1.63634	TRUE	Negative
KBTBD2	-1.76466	4.79783e-05	4.31896	0.00991401	2.00375	TRUE	Negative
GCN1L1	-1.70894	6.67328e-06	5.17566	0.0027907	2.55429	TRUE	Negative
PIH1D1	-1.61206	9.09693e-05	4.0411	0.0147688	1.83065	TRUE	Negative
MYBL2	-1.60912	2.09181e-05	4.67948	0.00633458	2.19828	TRUE	Negative
TRIM28	-1.56686	6.33231e-05	4.19844	0.0117074	1.93154	TRUE	Negative
CUL4B	-1.53202	0.000442022	3.35456	0.0406475	1.39097	TRUE	Negative
DNAJC9	-1.51966	0.000161623	3.7915	0.0207208	1.68359	TRUE	Negative
PHF6	-1.47258	7.59336e-05	4.11957	0.012824	1.89198	TRUE	Negative
UBE3D	-1.45976	0.000117747	3.92905	0.0168139	1.77433	TRUE	Negative
PHIP	-1.43923	0.000128962	3.88954	0.0181207	1.74183	TRUE	Negative
TADA2B	-1.43389	4.48656e-05	4.34809	0.00963609	2.0161	TRUE	Negative
TMED2	-1.4086	0.000134711	3.8706	0.0184849	1.73318	TRUE	Negative
ARID4B	-1.3845	9.87717e-05	4.00537	0.0154234	1.81182	TRUE	Negative
TM9SF2	-1.36947	8.34415e-05	4.07862	0.0139578	1.85518	TRUE	Negative
PHF16	-1.34913	0.000376803	3.42389	0.0359683	1.44408	TRUE	Negative
CDK6	-1.34692	6.96722e-05	4.15694	0.012487	1.90354	TRUE	Negative
TADA1	-1.33894	7.291e-05	4.13721	0.0126791	1.89691	TRUE	Negative
DCUN1D1	-1.33867	0.00119956	2.92098	0.0792068	1.10124	TRUE	Negative
CDK2	-1.33718	0.00106569	2.97237	0.0734032	1.13428	TRUE	Negative
MYL6	-1.30263	0.000155889	3.80718	0.0204331	1.68967	TRUE	Negative
CCND2	-1.29198	0.000115591	3.93708	0.0168139	1.77433	TRUE	Negative
ING3	-1.28309	0.000186123	3.7302	0.0231023	1.63634	TRUE	Negative
OGT	-1.28145	0.000444974	3.35167	0.0407059	1.39034	TRUE	Negative
ERF	-1.26882	0.000338377	3.4706	0.0333891	1.4764	TRUE	Negative
NASP	-1.26784	0.00164176	2.78469	0.0976981	1.01011	TRUE	Negative
ORC5	-1.26545	0.000282186	3.54946	0.0288158	1.54037	TRUE	Negative
CDK12	-1.2651	0.00254871	2.59368	0.126456	0.898059	TRUE	Negative
FBRS	-1.26019	0.00036899	3.43299	0.0355051	1.44971	TRUE	Negative
FAM60A	-1.2391	0.000850193	3.07048	0.0630075	1.20061	TRUE	Negative
USP46	-1.23145	0.000177355	3.75116	0.0224105	1.64955	TRUE	Negative
STT3A	-1.21746	0.000199883	3.69922	0.0243684	1.61317	TRUE	Negative
UFD1L	-1.21029	0.00285824	2.5439	0.136419	0.865126	TRUE	Negative
BRWD3	-1.20661	0.000621647	3.20646	0.0520335	1.28372	TRUE	Negative
STYX	-1.20349	0.000253687	3.5957	0.0279279	1.55396	TRUE	Negative
ZBTB2	-1.20036	0.000967927	3.01416	0.067463	1.17093	TRUE	Negative
METTL4	-1.19456	0.00025761	3.58904	0.0279279	1.55396	TRUE	Negative
CCND1	-1.1848	0.000572853	3.24196	0.0498099	1.30268	TRUE	Negative
ZC3H15	-1.1836	0.00241218	2.61759	0.122449	0.912044	TRUE	Negative
IRS2	-1.18172	0.000616081	3.21036	0.0520233	1.2838	TRUE	Negative
EIF4H	-1.18002	0.00031326	3.5041	0.0314406	1.50251	TRUE	Negative
FBXO22	-1.17617	0.00799497	2.09718	0.233201	0.63227	TRUE	Negative
HAT1	-1.16608	0.00188076	2.72567	0.105539	0.976587	TRUE	Negative
THRA	-1.15923	0.000582708	3.23455	0.0504172	1.29742	TRUE	Negative
PTPN11	-1.1589	0.0017735	2.75117	0.103488	0.985111	TRUE	Negative
MAX	-1.14296	0.00238136	2.62318	0.122163	0.913059	TRUE	Negative
TCF12	-1.14011	0.0021447	2.66863	0.11415	0.942525	TRUE	Negative
SLTM	-1.13623	0.00205551	2.68708	0.111948	0.950984	TRUE	Negative
ENPP4	-1.13272	0.000729025	3.13726	0.0569093	1.24482	TRUE	Negative
ASXL1	-1.12868	0.000798424	3.09777	0.0607079	1.21675	TRUE	Negative
DRG1	-1.1283	0.000815546	3.08855	0.0614775	1.21128	TRUE	Negative
SUPT20H	-1.12608	0.000548474	3.26084	0.048409	1.31507	TRUE	Negative
ING5	-1.11948	0.00755356	2.12185	0.226458	0.645013	TRUE	Negative
H2AFZ	-1.1169	0.000716901	3.14454	0.0565597	1.24749	TRUE	Negative
ZNF462	-1.10157	0.00181414	2.74133	0.103949	0.983179	TRUE	Negative
ATXN2L	-1.09529	0.000605942	3.21757	0.0516639	1.28681	TRUE	Negative
ANKRD52	-1.09338	0.00186278	2.72984	0.105202	0.977975	TRUE	Negative
PDGFRA	-1.08387	0.000650136	3.187	0.0531116	1.27481	TRUE	Negative
GADD45G	-1.07844	0.000826999	3.0825	0.0620744	1.20709	TRUE	Negative
DCLRE1B	-1.07729	0.000608961	3.21541	0.0516705	1.28676	TRUE	Negative
POLR3F	-1.07367	0.000941989	3.02595	0.067463	1.17093	TRUE	Negative
JMJD6	-1.07139	0.00288924	2.53922	0.137211	0.862611	TRUE	Negative
EXOC5	-1.07034	0.00223808	2.65012	0.117199	0.931075	TRUE	Negative
PDCL	-1.06396	0.00146715	2.83353	0.0907576	1.04212	TRUE	Negative
TRAPPC11	-1.06022	0.00133218	2.87544	0.0841668	1.07486	TRUE	Negative
EWSR1	-1.05965	0.00119427	2.9229	0.0792068	1.10124	TRUE	Negative
NPLOC4	-1.05447	0.0115163	1.93869	0.283691	0.547155	TRUE	Negative
FAT2	-1.0539	0.00184861	2.73315	0.104857	0.979402	TRUE	Negative
KCTD9	-1.05347	0.00369843	2.43198	0.157387	0.803032	TRUE	Negative
SYS1	-1.04912	0.00275774	2.55945	0.133799	0.873547	TRUE	Negative
EIF2B1	-1.04852	0.00460139	2.33711	0.175693	0.755246	TRUE	Negative
BPTF	-1.0471	0.00182284	2.73925	0.103949	0.983179	TRUE	Negative
NELFE	-1.04625	0.0024665	2.60792	0.12389	0.906964	TRUE	Negative
SRCAP	-1.03544	0.00167953	2.77481	0.0993241	1.00295	TRUE	Negative
ROCK2	-1.03486	0.00410459	2.38673	0.165399	0.781468	TRUE	Negative
RICTOR	-1.03362	0.00161088	2.79294	0.0976842	1.01018	TRUE	Negative
KIAA0100	-1.02898	0.00143385	2.8435	0.0896234	1.04758	TRUE	Negative
ADAM21	-1.02716	0.00948642	2.0229	0.256349	0.591169	TRUE	Negative
TCEAL8	-1.02573	0.0096097	2.01729	0.258476	0.58758	TRUE	Negative
PSMD1	-1.02542	0.00541398	2.26648	0.194064	0.712056	TRUE	Negative
ASB12	-1.02037	0.00501519	2.29971	0.184905	0.73305	TRUE	Negative
COMMD5	-1.01953	0.00392206	2.40649	0.162982	0.78786	TRUE	Negative
ATG4D	-1.01417	0.00220643	2.65631	0.116299	0.934424	TRUE	Negative
MYO10	-1.00749	0.00282182	2.54947	0.135417	0.868328	TRUE	Negative
NFYB	-1.00384	0.00645736	2.18995	0.211995	0.673675	TRUE	Negative
RPN1	-0.994511	0.00260252	2.58461	0.128041	0.892651	TRUE	Negative
UBXN7	-0.990083	0.00216729	2.66408	0.114658	0.940597	TRUE	Negative
SRC	-0.982097	0.00245873	2.60929	0.12389	0.906964	TRUE	Negative
CENPQ	-0.980871	0.00979946	2.0088	0.26118	0.58306	TRUE	Negative
GTF3C5	-0.980654	0.00533898	2.27254	0.192159	0.716338	TRUE	Negative
EXOC4	-0.975292	0.00425187	2.37142	0.167698	0.775472	TRUE	Negative
EIF5	-0.971672	0.00630663	2.2002	0.210189	0.67739	TRUE	Negative
ATP2C1	-0.964296	0.00313043	2.5044	0.143559	0.842971	TRUE	Negative
COG7	-0.962716	0.00945383	2.02439	0.256245	0.591344	TRUE	Negative
MAP2K6	-0.961487	0.0054734	2.26174	0.195794	0.708201	TRUE	Negative
ASCL4	-0.956295	0.00322409	2.49159	0.145832	0.836148	TRUE	Negative
NSFL1C	-0.954296	0.0104651	1.98026	0.271147	0.566796	TRUE	Negative
ARF1	-0.952252	0.00189103	2.7233	0.105541	0.976579	TRUE	Negative
MAPKAP1	-0.950675	0.00225537	2.64678	0.117199	0.931075	TRUE	Negative
CCNC	-0.947721	0.00254432	2.59443	0.126456	0.898059	TRUE	Negative
MYH10	-0.946334	0.00475059	2.32325	0.178671	0.747945	TRUE	Negative
VHL	-0.942949	0.00276526	2.55826	0.133799	0.873547	TRUE	Negative
ABCF2	-0.942342	0.00572563	2.24218	0.199774	0.699462	TRUE	Negative
DDA1	-0.93686	0.00495687	2.30479	0.183533	0.736287	TRUE	Negative
PATZ1	-0.933996	0.00216671	2.6642	0.114658	0.940597	TRUE	Negative
TTI1	-0.932124	0.00537005	2.27002	0.192883	0.714707	TRUE	Negative
CHMP7	-0.931251	0.00473047	2.3251	0.178671	0.747945	TRUE	Negative
DPY30	-0.926583	0.00289126	2.53891	0.137211	0.862611	TRUE	Negative
FILIP1	-0.925108	0.00937095	2.02822	0.255722	0.592231	TRUE	Negative
AEBP2	-0.919525	0.00210867	2.67599	0.113262	0.945915	TRUE	Negative
VIP	-0.917222	0.00304288	2.51672	0.14094	0.850967	TRUE	Negative
ARMC7	-0.915467	0.0127996	1.8928	0.300578	0.522042	TRUE	Negative
GRB2	-0.915343	0.00548721	2.26065	0.195889	0.70799	TRUE	Negative
ZEB2	-0.913434	0.00423097	2.37356	0.167698	0.775472	TRUE	Negative
PITX1	-0.91134	0.00634787	2.19737	0.210366	0.677024	TRUE	Negative
MYO9B	-0.908931	0.00649853	2.18718	0.212948	0.671726	TRUE	Negative
GTF3C2	-0.908714	0.00393617	2.40493	0.162982	0.78786	TRUE	Negative
TNFSF12	-0.908414	0.00530719	2.27514	0.191408	0.718041	TRUE	Negative
PCBP2	-0.908388	0.0023307	2.63251	0.120401	0.919368	TRUE	Negative
INSR	-0.906151	0.00482475	2.31653	0.180302	0.744	TRUE	Negative
EIF4B	-0.900669	0.00823654	2.08426	0.236807	0.625605	TRUE	Negative
S1PR1	-0.900176	0.00794111	2.10012	0.232347	0.633862	TRUE	Negative
NFIX	-0.896029	0.00379871	2.42036	0.160001	0.795876	TRUE	Negative
F2	-0.895665	0.00257571	2.5891	0.127436	0.894708	TRUE	Negative
EIF4G1	-0.895048	0.00680592	2.16711	0.218696	0.660158	TRUE	Negative
BBC3	-0.894618	0.00405676	2.39182	0.16532	0.781674	TRUE	Negative
SIRT1	-0.893766	0.00394506	2.40395	0.162982	0.78786	TRUE	Negative
DESI1	-0.893175	0.00491724	2.30828	0.182593	0.738516	TRUE	Negative
THOC5	-0.891704	0.0065759	2.18205	0.213949	0.66969	TRUE	Negative
ELOVL1	-0.890283	0.00733228	2.13476	0.224363	0.649049	TRUE	Negative
SOX3	-0.89022	0.00897118	2.04715	0.249406	0.603092	TRUE	Negative
TOX4	-0.885118	0.00322982	2.49082	0.145832	0.836148	TRUE	Negative
CSTF2	-0.885117	0.00431664	2.36485	0.168968	0.772195	TRUE	Negative
RRAS2	-0.883954	0.00517319	2.28624	0.189296	0.722859	TRUE	Negative
PPP1R3F	-0.882924	0.00623593	2.2051	0.209422	0.678977	TRUE	Negative
OR5AR1	-0.882675	0.00312112	2.50569	0.143559	0.842971	TRUE	Negative
HBS1L	-0.878803	0.00405505	2.392	0.16532	0.781674	TRUE	Negative
MERTK	-0.876771	0.00629178	2.20123	0.210189	0.67739	TRUE	Negative
OR6B3	-0.875839	0.00341166	2.46703	0.151396	0.819887	TRUE	Negative
THRAP3	-0.875154	0.00318964	2.49626	0.145251	0.837881	TRUE	Negative
HYLS1	-0.874883	0.0194233	1.71168	0.366018	0.436498	TRUE	Negative
RBBP5	-0.874867	0.0123477	1.90841	0.294668	0.530667	TRUE	Negative
ELF2	-0.873655	0.00600089	2.22178	0.204263	0.689811	TRUE	Negative
RPS19BP1	-0.873485	0.00438993	2.35754	0.170586	0.768057	TRUE	Negative
TASP1	-0.873461	0.00612972	2.21256	0.207468	0.683048	TRUE	Negative
PSMD6	-0.872037	0.00359652	2.44412	0.155861	0.807263	TRUE	Negative
COG2	-0.87132	0.00454518	2.34245	0.174074	0.759266	TRUE	Negative
PIGT	-0.870751	0.00945042	2.02455	0.256245	0.591344	TRUE	Negative
ATP6V1F	-0.870134	0.00719403	2.14303	0.222596	0.652483	TRUE	Negative
MDM4	-0.869908	0.00361063	2.44242	0.155861	0.807263	TRUE	Negative
XPOT	-0.869484	0.0162785	1.78838	0.337563	0.471645	TRUE	Negative
UBAC1	-0.869202	0.0147065	1.83249	0.319324	0.495769	TRUE	Negative
AKIRIN1	-0.868355	0.0132406	1.87809	0.303205	0.518264	TRUE	Negative
IREB2	-0.867288	0.00642069	2.19242	0.211308	0.675084	TRUE	Negative
SMARCA4	-0.863503	0.00462279	2.3351	0.175746	0.755114	TRUE	Negative
MED15	-0.857727	0.00920942	2.03577	0.25367	0.595731	TRUE	Negative
MED13	-0.855354	0.00755546	2.12174	0.226458	0.645013	TRUE	Negative
BEND3	-0.854818	0.00885712	2.05271	0.247323	0.606735	TRUE	Negative
RPRD1A	-0.851913	0.0067584	2.17016	0.218207	0.661132	TRUE	Negative
MAD1L1	-0.851285	0.00779049	2.10844	0.22997	0.638329	TRUE	Negative
ARID2	-0.849831	0.0074821	2.12598	0.226189	0.645529	TRUE	Negative
PSMC1	-0.848694	0.0198817	1.70155	0.368557	0.433495	TRUE	Negative
SLC25A36	-0.848345	0.0149456	1.82549	0.322091	0.492022	TRUE	Negative
CASP5	-0.84554	0.0157042	1.80398	0.331523	0.479486	TRUE	Negative
KIR3DL1	-0.844609	0.00431945	2.36457	0.168968	0.772195	TRUE	Negative
SIN3B	-0.844294	0.0113781	1.94393	0.282089	0.549614	TRUE	Negative
ITGAM	-0.843961	0.00727512	2.13816	0.223002	0.651691	TRUE	Negative
TMEM258	-0.841655	0.00577282	2.23861	0.200595	0.697679	TRUE	Negative
KAT2A	-0.841611	0.00510928	2.29164	0.187347	0.727353	TRUE	Negative
PASD1	-0.838091	0.00655596	2.18336	0.213949	0.66969	TRUE	Negative
DIRAS3	-0.835862	0.0181192	1.74186	0.354473	0.450417	TRUE	Negative
HK1	-0.832004	0.015627	1.80612	0.331313	0.479762	TRUE	Negative
YEATS4	-0.831837	0.00821196	2.08555	0.236807	0.625605	TRUE	Negative
ALDOC	-0.831688	0.00502477	2.29888	0.184905	0.73305	TRUE	Negative
PSMD11	-0.831327	0.021718	1.66318	0.383758	0.415943	TRUE	Negative
VPS72	-0.830799	0.00491429	2.30854	0.182593	0.738516	TRUE	Negative
PLIN2	-0.830117	0.00527426	2.27784	0.191004	0.718957	TRUE	Negative
DMAP1	-0.828877	0.0233085	1.63249	0.395387	0.402977	TRUE	Negative
RP11-389E17.1	-0.826401	0.0207742	1.68248	0.377329	0.423279	TRUE	Negative
SNX13	-0.822866	0.00642441	2.19217	0.211308	0.675084	TRUE	Negative
CHCHD10	-0.821571	0.00762646	2.11768	0.227808	0.642431	TRUE	Negative
RAB14	-0.81967	0.00618113	2.20893	0.20798	0.681979	TRUE	Negative
HIGD2B	-0.817845	0.0229254	1.63968	0.391314	0.407475	TRUE	Negative
TTK	-0.816596	0.0079504	2.09961	0.232347	0.633862	TRUE	Negative
ALDH7A1	-0.81547	0.0175428	1.7559	0.349345	0.456745	TRUE	Negative
ZSWIM4	-0.813375	0.00913345	2.03937	0.25263	0.597515	TRUE	Negative
SMARCAD1	-0.80879	0.0147382	1.83156	0.319582	0.495417	TRUE	Negative
SMIM3	-0.807	0.0160178	1.7954	0.335309	0.474555	TRUE	Negative
PGM1	-0.806498	0.0201241	1.69628	0.370114	0.431665	TRUE	Negative
TBC1D25	-0.8064	0.00822191	2.08503	0.236807	0.625605	TRUE	Negative
RWDD1	-0.806309	0.0191578	1.71765	0.365634	0.436953	TRUE	Negative
SNX10	-0.804949	0.00702193	2.15354	0.221424	0.654775	TRUE	Negative
BUB3	-0.803645	0.0137922	1.86037	0.306686	0.513306	TRUE	Negative
SLC43A1	-0.803133	0.0160318	1.79502	0.335309	0.474555	TRUE	Negative
TFDP3	-0.801823	0.0066104	2.17977	0.214216	0.669148	TRUE	Negative
AWAT2	-0.800948	0.00949574	2.02247	0.256349	0.591169	TRUE	Negative
TAF7	-0.798583	0.011264	1.94831	0.281425	0.550638	TRUE	Negative
HDLBP	-0.797514	0.00865464	2.06275	0.244397	0.611904	TRUE	Negative
ZNF275	-0.79672	0.00579634	2.23685	0.200595	0.697679	TRUE	Negative
NCAPG2	-0.796322	0.00720851	2.14215	0.222596	0.652483	TRUE	Negative
NAT10	-0.793818	0.0234999	1.62893	0.395794	0.402531	TRUE	Negative
ALKBH8	-0.792599	0.00633149	2.19849	0.210366	0.677024	TRUE	Negative
CD200	-0.790046	0.00822688	2.08476	0.236807	0.625605	TRUE	Negative
C6orf141	-0.789952	0.00736008	2.13312	0.224522	0.64874	TRUE	Negative
HCLS1	-0.787741	0.00890583	2.05033	0.248289	0.605043	TRUE	Negative
NOL11	-0.786087	0.0124605	1.90446	0.294847	0.530403	TRUE	Negative
PANK3	-0.785674	0.0109923	1.95891	0.277827	0.556226	TRUE	Negative
DDX53	-0.784978	0.00760953	2.11864	0.22769	0.642657	TRUE	Negative
FANCB	-0.784631	0.00856839	2.0671	0.243126	0.614168	TRUE	Negative
KBTBD8	-0.784236	0.0240128	1.61956	0.399918	0.398029	TRUE	Negative
MCOLN2	-0.783944	0.00871057	2.05995	0.244397	0.611904	TRUE	Negative
ZNF808	-0.783179	0.0101196	1.99484	0.26728	0.573033	TRUE	Negative
PFKFB1	-0.781419	0.0210846	1.67603	0.380297	0.419877	TRUE	Negative
SERF2	-0.781033	0.0137658	1.8612	0.306686	0.513306	TRUE	Negative
KATNA1	-0.780378	0.00788609	2.10314	0.231624	0.635216	TRUE	Negative
DHX38	-0.778767	0.0091052	2.04071	0.252246	0.598176	TRUE	Negative
PARVB	-0.777822	0.0166466	1.77868	0.340769	0.46754	TRUE	Negative
ZFP14	-0.777808	0.0117703	1.92921	0.28753	0.541316	TRUE	Negative
COL4A6	-0.776422	0.00926984	2.03293	0.254399	0.594484	TRUE	Negative
MTSS1	-0.775487	0.00940707	2.02655	0.25594	0.591861	TRUE	Negative
MAPK6	-0.775032	0.00826037	2.083	0.237067	0.625128	TRUE	Negative
FLI1	-0.772964	0.0099275	2.00316	0.263798	0.578729	TRUE	Negative
TAF5L	-0.772523	0.0144531	1.84004	0.315347	0.501211	TRUE	Negative
YKT6	-0.771905	0.0217681	1.66218	0.383934	0.415743	TRUE	Negative
COG1	-0.770823	0.0201208	1.69636	0.370114	0.431665	TRUE	Negative
SLC4A7	-0.769356	0.0120023	1.92074	0.289779	0.537934	TRUE	Negative
NCOR2	-0.766976	0.0133429	1.87475	0.304233	0.516793	TRUE	Negative
PSMC4	-0.766086	0.0219816	1.65794	0.385314	0.414185	TRUE	Negative
TAF13	-0.765584	0.0199044	1.70105	0.368557	0.433495	TRUE	Negative
PSMD3	-0.765203	0.0163029	1.78773	0.33767	0.471507	TRUE	Negative
CBFB	-0.7644	0.0155854	1.80728	0.331313	0.479762	TRUE	Negative
XRCC1	-0.762853	0.0124659	1.90428	0.294847	0.530403	TRUE	Negative
UNC45A	-0.76229	0.00867034	2.06196	0.244397	0.611904	TRUE	Negative
LMNB2	-0.762251	0.0128348	1.89161	0.300578	0.522042	TRUE	Negative
GRIP1	-0.762214	0.00921437	2.03553	0.25367	0.595731	TRUE	Negative
IL4I1	-0.760969	0.00813378	2.08971	0.235745	0.627557	TRUE	Negative
SPINK9	-0.760898	0.0109817	1.95933	0.277827	0.556226	TRUE	Negative
UBE2R2	-0.760326	0.0171653	1.76535	0.344956	0.462236	TRUE	Negative
HIVEP3	-0.759373	0.0116912	1.93214	0.286795	0.542429	TRUE	Negative
ATP6V1E1	-0.757074	0.0225543	1.64677	0.38914	0.409895	TRUE	Negative
LEO1	-0.75176	0.0165825	1.78035	0.340252	0.4682	TRUE	Negative
SLC16A2	-0.751273	0.011403	1.94298	0.282089	0.549614	TRUE	Negative
SNIP1	-0.74932	0.00897431	2.047	0.249406	0.603092	TRUE	Negative
SLC10A3	-0.74895	0.0114689	1.94048	0.28292	0.548336	TRUE	Negative
SCAF8	-0.746739	0.0121863	1.91413	0.291825	0.534877	TRUE	Negative
MORF4L2	-0.740852	0.0115416	1.93773	0.283918	0.546808	TRUE	Negative
PTPRU	-0.737885	0.00968595	2.01386	0.259335	0.586138	TRUE	Negative
PAX7	-0.737301	0.0136963	1.8634	0.306506	0.513562	TRUE	Negative
SETMAR	-0.737296	0.0140952	1.85093	0.311274	0.506857	TRUE	Negative
LMTK3	-0.737117	0.00992771	2.00315	0.263798	0.578729	TRUE	Negative
KDM6B	-0.736545	0.0124405	1.90516	0.294847	0.530403	TRUE	Negative
ACAD8	-0.736135	0.010774	1.96762	0.275444	0.559966	TRUE	Negative
MAN1C1	-0.73407	0.0161785	1.79106	0.33716	0.472164	TRUE	Negative
AIDA	-0.733446	0.0141069	1.85057	0.311274	0.506857	TRUE	Negative
MED25	-0.731487	0.0116146	1.935	0.285313	0.544678	TRUE	Negative
TTC14	-0.728572	0.0197808	1.70376	0.368298	0.4338	TRUE	Negative
PAWR	-0.727612	0.0169778	1.77012	0.344288	0.463078	TRUE	Negative
GREM1	-0.726301	0.0118596	1.92593	0.288439	0.539946	TRUE	Negative
ARSD	-0.725547	0.011392	1.9434	0.282089	0.549614	TRUE	Negative
FOXP3	-0.725515	0.015305	1.81517	0.326701	0.48585	TRUE	Negative
MMGT1	-0.725501	0.0215607	1.66634	0.382509	0.417358	TRUE	Negative
KLHL4	-0.724599	0.0164712	1.78328	0.339354	0.469347	TRUE	Negative
CYR61	-0.72427	0.019662	1.70637	0.367726	0.434476	TRUE	Negative
CAPN13	-0.724038	0.014819	1.82918	0.320894	0.493638	TRUE	Negative
HPRT1	-0.723699	0.0166109	1.77961	0.340436	0.467964	TRUE	Negative
C11orf44	-0.723653	0.0197134	1.70524	0.367956	0.434205	TRUE	Negative
CD3E	-0.723369	0.0131406	1.88138	0.302889	0.518716	TRUE	Negative
MED10	-0.722618	0.0137163	1.86276	0.306506	0.513562	TRUE	Negative
CEP120	-0.722529	0.0172953	1.76207	0.345985	0.460943	TRUE	Negative
SRSF10	-0.721134	0.0170074	1.76936	0.344288	0.463078	TRUE	Negative
EHMT1	-0.719899	0.015803	1.80126	0.332811	0.477803	TRUE	Negative
FAM155B	-0.718766	0.0178467	1.74844	0.351807	0.453696	TRUE	Negative
PHF23	-0.717266	0.0165094	1.78227	0.339354	0.469347	TRUE	Negative
JAM3	-0.716533	0.013434	1.87179	0.304458	0.516472	TRUE	Negative
PIGQ	-0.715112	0.0129787	1.88677	0.301668	0.52047	TRUE	Negative
FAM122C	-0.713836	0.0175764	1.75507	0.349618	0.456406	TRUE	Negative
EREG	-0.713689	0.0205734	1.68669	0.375235	0.425697	TRUE	Negative
SPECC1L	-0.713322	0.0172491	1.76323	0.345455	0.461609	TRUE	Negative
FXR1	-0.713	0.023946	1.62077	0.399799	0.398159	TRUE	Negative
RNF113B	-0.711833	0.0186166	1.7301	0.358926	0.444995	TRUE	Negative
GJE1	-0.711773	0.015299	1.81534	0.326701	0.48585	TRUE	Negative
EGLN2	-0.710836	0.0239384	1.62091	0.399799	0.398159	TRUE	Negative
FAM102B	-0.710473	0.0149968	1.824	0.322798	0.491069	TRUE	Negative
MAGEB3	-0.71044	0.0188211	1.72535	0.361341	0.442083	TRUE	Negative
WDR44	-0.708545	0.0136567	1.86465	0.306506	0.513562	TRUE	Negative
MON2	-0.706742	0.0193109	1.7142	0.365887	0.436653	TRUE	Negative
INO80C	-0.704808	0.0192768	1.71497	0.365634	0.436953	TRUE	Negative
TAC1	-0.703524	0.0169321	1.77129	0.34381	0.463682	TRUE	Negative
DDOST	-0.702492	0.0236489	1.62619	0.396822	0.401404	TRUE	Negative
USP1	-0.702145	0.0194158	1.71185	0.366018	0.436498	TRUE	Negative
MESDC1	-0.701806	0.0231405	1.63563	0.393837	0.404683	TRUE	Negative
ERAS	-0.698302	0.0195111	1.70972	0.366203	0.436278	TRUE	Negative
TSPAN7	-0.697516	0.0183029	1.73748	0.356684	0.447717	TRUE	Negative
HSPBAP1	-0.69545	0.0170959	1.76711	0.344918	0.462284	TRUE	Negative
TMEM55B	-0.69464	0.0135184	1.86907	0.305203	0.515411	TRUE	Negative
PRPS2	-0.694418	0.020442	1.68948	0.373614	0.427577	TRUE	Negative
NAF1	-0.694067	0.0228916	1.64032	0.391211	0.407589	TRUE	Negative
ATXN2	-0.693958	0.0187553	1.72687	0.360809	0.442722	TRUE	Negative
IL16	-0.693244	0.0224831	1.64814	0.38914	0.409895	TRUE	Negative
DIRC2	-0.693218	0.0170145	1.76918	0.344288	0.463078	TRUE	Negative
SH2D4A	-0.692132	0.0152685	1.8162	0.326701	0.48585	TRUE	Negative
POP4	-0.691723	0.0183175	1.73713	0.356684	0.447717	TRUE	Negative
STXBP5	-0.69097	0.0177931	1.74975	0.351213	0.454429	TRUE	Negative
APLN	-0.690174	0.0142138	1.84729	0.311674	0.506299	TRUE	Negative
USP42	-0.684931	0.0162015	1.79044	0.33716	0.472164	TRUE	Negative
PDCD10	-0.684508	0.0182983	1.73759	0.356684	0.447717	TRUE	Negative
CLLU1OS	-0.683095	0.0213273	1.67106	0.380297	0.419877	TRUE	Negative
NAA15	-0.682684	0.0172329	1.76364	0.345455	0.461609	TRUE	Negative
NSUN2	-0.681825	0.0228971	1.64022	0.391211	0.407589	TRUE	Negative
RPP14	-0.681098	0.0219246	1.65907	0.385314	0.414185	TRUE	Negative
MST4	-0.680402	0.0224652	1.64849	0.38914	0.409895	TRUE	Negative
LSM11	-0.680085	0.0224526	1.64873	0.38914	0.409895	TRUE	Negative
TAPT1	-0.679427	0.0184198	1.73471	0.357629	0.446567	TRUE	Negative
RDH8	-0.678877	0.0199154	1.70081	0.368557	0.433495	TRUE	Negative
PTGR2	-0.676792	0.0223929	1.64989	0.38914	0.409895	TRUE	Negative
PSMG1	-0.675573	0.0211938	1.67379	0.380297	0.419877	TRUE	Negative
TNRC18	-0.674865	0.0194352	1.71141	0.366018	0.436498	TRUE	Negative
JHDM1D	-0.6746	0.0202036	1.69457	0.371188	0.430406	TRUE	Negative
ZNF624	-0.673782	0.0193861	1.71251	0.366018	0.436498	TRUE	Negative
RAP1A	-0.673664	0.0225137	1.64755	0.38914	0.409895	TRUE	Negative
TEX13A	-0.67248	0.0176745	1.75265	0.350774	0.454973	TRUE	Negative
SPATA9	-0.670471	0.0181023	1.74227	0.354473	0.450417	TRUE	Negative
MYOD1	-0.670448	0.020441	1.6895	0.373614	0.427577	TRUE	Negative
GRIPAP1	-0.670105	0.0173379	1.761	0.346442	0.460369	TRUE	Negative
ATP6V1G1	-0.670097	0.0198654	1.7019	0.368557	0.433495	TRUE	Negative
CLDN12	-0.669555	0.0200533	1.69781	0.369975	0.431828	TRUE	Negative
FAM26F	-0.668537	0.0169142	1.77175	0.34381	0.463682	TRUE	Negative
SCGB3A2	-0.666747	0.0221293	1.65503	0.387516	0.41171	TRUE	Negative
LENEP	-0.665862	0.019272	1.71507	0.365634	0.436953	TRUE	Negative
RAB6C	-0.665348	0.0215301	1.66695	0.382509	0.417358	TRUE	Negative
C4orf36	-0.661578	0.0185588	1.73145	0.358206	0.445867	TRUE	Negative
C5orf54	-0.660659	0.0224264	1.64924	0.38914	0.409895	TRUE	Negative
HERC3	-0.660278	0.0238789	1.62199	0.399438	0.398551	TRUE	Negative
SCRIB	-0.658486	0.0195361	1.70916	0.366203	0.436278	TRUE	Negative
PCDH1	-0.652844	0.021582	1.66591	0.382509	0.417358	TRUE	Negative
DMRTA1	-0.652271	0.0234026	1.63074	0.395387	0.402977	TRUE	Negative
FOXM1	-0.652092	0.0212227	1.6732	0.380297	0.419877	TRUE	Negative
AKT1	-0.651103	0.0192431	1.71573	0.365634	0.436953	TRUE	Negative
EIF2D	-0.650772	0.0226829	1.6443	0.390216	0.408695	TRUE	Negative
OLA1	-0.649147	0.0219757	1.65806	0.385314	0.414185	TRUE	Negative
GNB1	-0.649042	0.0200091	1.69877	0.369548	0.432329	TRUE	Negative
ZNF549	-0.647003	0.0197833	1.7037	0.368298	0.4338	TRUE	Negative
FBLN1	-0.643311	0.0206815	1.68442	0.376445	0.424298	TRUE	Negative
ZNF358	-0.638731	0.0227616	1.6428	0.390216	0.408695	TRUE	Negative
ZNF639	-0.637572	0.0235253	1.62846	0.395794	0.402531	TRUE	Negative
CRK	-0.637174	0.0227205	1.64358	0.390216	0.408695	TRUE	Negative
BRPF3	-0.637123	0.0230119	1.63805	0.392409	0.406261	TRUE	Negative

## Sheet: Palbociclib_Resistant
0.7µM Palbociclib Chemogenomics Screen Sensitive Genes
Gene	Differential	pValue	-log(pValue)	FDR	-log(FDR)	Significant?	Effect
HDAC3	5.86583	1.75087e-10	9.75675	1.38372e-06	5.85895	TRUE	Positive
LCMT1	5.66512	2.36344e-10	9.62645	1.38372e-06	5.85895	TRUE	Positive
EED	5.42207	1.47081e-09	8.83244	4.03113e-06	5.39457	TRUE	Positive
SUZ12	4.98292	1.30382e-11	10.8848	2.29002e-07	6.64016	TRUE	Positive
CRAMP1L	4.70389	1.6182e-09	8.79097	4.03113e-06	5.39457	TRUE	Positive
CABIN1	4.48178	4.81575e-10	9.31734	2.1146e-06	5.67477	TRUE	Positive
EZH2	3.58209	1.07285e-09	8.96946	3.76871e-06	5.42381	TRUE	Positive
MTF2	3.4241	1.35285e-05	4.86875	0.00448328	2.3484	TRUE	Positive
TSC2	3.40314	5.38406e-08	7.26889	6.75469e-05	4.17039	TRUE	Positive
DDX6	3.36364	1.83609e-09	8.73611	4.03113e-06	5.39457	TRUE	Positive
CCNF	3.25154	3.67325e-08	7.43495	5.86518e-05	4.23172	TRUE	Positive
HIRA	3.14256	2.13823e-08	7.66994	4.17288e-05	4.37956	TRUE	Positive
SLC16A1	3.05801	2.09162e-07	6.67952	0.000193354	3.71365	TRUE	Positive
HIST1H1C	3.02448	1.025e-05	4.98928	0.00384057	2.4156	TRUE	Positive
PDS5A	2.91654	5.32975e-08	7.27329	6.75469e-05	4.17039	TRUE	Positive
SAMD1	2.77198	4.28572e-08	7.36798	6.27287e-05	4.20253	TRUE	Positive
GIGYF2	2.74848	2.72388e-08	7.56481	4.78422e-05	4.32019	TRUE	Positive
PPP1R8	2.73589	8.6922e-08	7.06087	8.98057e-05	4.0467	TRUE	Positive
CHD8	2.70201	3.30459e-06	5.48088	0.00165834	2.78033	TRUE	Positive
NONO	2.69911	6.98517e-08	7.15582	7.66797e-05	4.11532	TRUE	Positive
NDUFS1	2.67208	4.52633e-07	6.34425	0.000361365	3.44205	TRUE	Positive
NF2	2.5595	2.06725e-07	6.68461	0.000193354	3.71365	TRUE	Positive
YBEY	2.52016	6.20452e-08	7.20729	7.26508e-05	4.13876	TRUE	Positive
MRGBP	2.45472	1.15494e-05	4.93744	0.00405706	2.39179	TRUE	Positive
MSL1	2.45362	6.47857e-05	4.18852	0.0117309	1.93067	TRUE	Positive
C16orf80	2.43285	1.02771e-05	4.98813	0.00384057	2.4156	TRUE	Positive
HIST1H1E	2.42145	1.33959e-05	4.87303	0.00448328	2.3484	TRUE	Positive
L3MBTL3	2.41265	1.62264e-06	5.78978	0.00105555	2.97652	TRUE	Positive
DDX5	2.33986	5.14636e-06	5.2885	0.0023787	2.62366	TRUE	Positive
USP14	2.3312	1.81766e-06	5.74049	0.00114019	2.94302	TRUE	Positive
PPP2R2A	2.32242	3.40917e-05	4.46735	0.00824352	2.08389	TRUE	Positive
HTRA2	2.31779	2.12425e-06	5.67279	0.00128656	2.89057	TRUE	Positive
PAXIP1	2.30447	5.88136e-06	5.23052	0.00254561	2.59421	TRUE	Positive
LIPT1	2.30379	6.45672e-05	4.18999	0.0117309	1.93067	TRUE	Positive
MEN1	2.26108	1.45437e-06	5.83732	0.00105555	2.97652	TRUE	Positive
PPME1	2.23678	1.45784e-05	4.83629	0.00474176	2.32406	TRUE	Positive
ASF1A	2.2303	3.72023e-07	6.42943	0.000311153	3.50703	TRUE	Positive
COQ2	2.22167	1.34285e-06	5.87197	0.00102547	2.98908	TRUE	Positive
ZBTB10	2.22057	2.93885e-06	5.53182	0.00151818	2.81868	TRUE	Positive
STAG2	2.21262	5.96187e-05	4.22462	0.0112796	1.94771	TRUE	Positive
EIF4E2	2.19613	1.61991e-05	4.79051	0.00508072	2.29407	TRUE	Positive
UBE2M	2.1498	5.94227e-06	5.22605	0.00254561	2.59421	TRUE	Positive
NME6	2.14537	2.47833e-06	5.60584	0.00140417	2.85258	TRUE	Positive
KMT2C	2.08775	1.59654e-06	5.79682	0.00105555	2.97652	TRUE	Positive
BAHD1	2.01815	5.4964e-06	5.25992	0.00247535	2.60636	TRUE	Positive
BRD8	1.9746	0.000292682	3.5336	0.0296126	1.52852	TRUE	Positive
GRSF1	1.96971	2.73104e-05	4.56367	0.00737969	2.13196	TRUE	Positive
KDM2A	1.96113	1.602e-06	5.79534	0.00105555	2.97652	TRUE	Positive
TAZ	1.95297	2.37615e-05	4.62413	0.00673141	2.17189	TRUE	Positive
PPP2R4	1.93331	3.15394e-05	4.50115	0.00814643	2.08903	TRUE	Positive
C7orf55-LUC7L2	1.92272	2.90901e-06	5.53626	0.00151818	2.81868	TRUE	Positive
FZR1	1.91815	2.31889e-06	5.63472	0.00135764	2.86722	TRUE	Positive
MTF1	1.90076	1.81171e-05	4.74191	0.0055826	2.25316	TRUE	Positive
MSL3	1.87428	0.00130113	2.88568	0.0831018	1.08039	TRUE	Positive
DAZAP1	1.84473	9.16535e-05	4.03785	0.0147688	1.83065	TRUE	Positive
SAFB	1.84425	3.54821e-05	4.44999	0.00830944	2.08043	TRUE	Positive
LIN37	1.83457	7.09588e-05	4.14899	0.0125891	1.90001	TRUE	Positive
UBE2F	1.83367	4.70917e-05	4.32706	0.00991401	2.00375	TRUE	Positive
TFAP4	1.83142	0.00182103	2.73968	0.103949	0.983179	TRUE	Positive
DET1	1.8196	0.000659318	3.18091	0.0533652	1.27274	TRUE	Positive
SETDB1	1.79259	1.53567e-05	4.8137	0.00490408	2.30944	TRUE	Positive
PET117	1.78077	8.03991e-06	5.09475	0.00313806	2.50334	TRUE	Positive
NUP50	1.77128	0.000537035	3.27	0.0476388	1.32204	TRUE	Positive
COA6	1.76609	1.27409e-05	4.8948	0.00438788	2.35775	TRUE	Positive
MBTPS2	1.71658	0.000139105	3.85666	0.0186507	1.7293	TRUE	Positive
CS	1.70531	2.56038e-05	4.5917	0.00702663	2.15325	TRUE	Positive
MORF4L1	1.69985	5.97243e-05	4.22385	0.0112796	1.94771	TRUE	Positive
ACAD9	1.69354	2.20998e-05	4.65561	0.00657899	2.18184	TRUE	Positive
EDC4	1.68816	4.77666e-05	4.32088	0.00991401	2.00375	TRUE	Positive
CHAF1A	1.68454	0.0018507	2.73266	0.104857	0.979402	TRUE	Positive
PSIP1	1.68259	0.000240824	3.6183	0.0271143	1.5668	TRUE	Positive
C16orf72	1.67347	9.68639e-05	4.01384	0.0153272	1.81454	TRUE	Positive
MCAT	1.65871	2.90015e-05	4.53758	0.0077179	2.1125	TRUE	Positive
MTFMT	1.65643	1.06088e-05	4.97434	0.00388192	2.41095	TRUE	Positive
PRKRIR	1.65287	0.000100984	3.99575	0.0154234	1.81182	TRUE	Positive
MTX2	1.6491	3.35362e-05	4.47449	0.00824352	2.08389	TRUE	Positive
STK11	1.63663	5.11839e-05	4.29087	0.010101	1.99563	TRUE	Positive
PIAS1	1.63536	3.72632e-05	4.42872	0.00848792	2.0712	TRUE	Positive
UBE2G2	1.63493	0.000116466	3.9338	0.0168139	1.77433	TRUE	Positive
PPIE	1.63338	0.000204544	3.68921	0.0243684	1.61317	TRUE	Positive
ATG9A	1.63316	4.01427e-05	4.39639	0.00881332	2.05486	TRUE	Positive
TMCO6	1.63176	0.00124997	2.9031	0.0804195	1.09464	TRUE	Positive
MGEA5	1.61024	5.04477e-05	4.29716	0.010101	1.99563	TRUE	Positive
OXSM	1.5978	8.76415e-05	4.05729	0.0143863	1.84205	TRUE	Positive
MAU2	1.59118	7.39363e-05	4.13114	0.0127125	1.89577	TRUE	Positive
HUWE1	1.58828	0.000104053	3.98274	0.0156204	1.80631	TRUE	Positive
EIF4ENIF1	1.58821	3.52318e-05	4.45307	0.00830944	2.08043	TRUE	Positive
RTN4IP1	1.58763	3.65874e-05	4.43667	0.00845555	2.07286	TRUE	Positive
SCO1	1.58593	0.00413403	2.38363	0.165399	0.781468	TRUE	Positive
FBXW7	1.58432	0.00388976	2.41008	0.162666	0.788703	TRUE	Positive
OAZ1	1.58432	3.03999e-05	4.51713	0.00796932	2.09858	TRUE	Positive
INTS6	1.56972	2.42248e-05	4.61574	0.00675372	2.17046	TRUE	Positive
DCP2	1.56874	0.000137979	3.86019	0.018642	1.72951	TRUE	Positive
UFL1	1.56541	3.7694e-05	4.42373	0.00848792	2.0712	TRUE	Positive
RAB5C	1.55637	0.000100977	3.99578	0.0154234	1.81182	TRUE	Positive
SPEN	1.55534	0.00146235	2.83495	0.0907576	1.04212	TRUE	Positive
C17orf89	1.55441	0.000117002	3.93181	0.0168139	1.77433	TRUE	Positive
RING1	1.54723	6.11263e-05	4.21377	0.0114215	1.94228	TRUE	Positive
IPMK	1.54222	5.39976e-05	4.26763	0.0105379	1.97724	TRUE	Positive
CUL5	1.53901	0.000175737	3.75514	0.022367	1.65039	TRUE	Positive
XRN1	1.53384	0.00159616	2.79692	0.0973436	1.01169	TRUE	Positive
HIST1H2AC	1.53382	4.49874e-05	4.34691	0.00963609	2.0161	TRUE	Positive
RFWD2	1.52644	0.00114436	2.94144	0.0773057	1.11179	TRUE	Positive
DARS2	1.52307	3.30621e-05	4.48067	0.00824352	2.08389	TRUE	Positive
REXO2	1.52171	3.29471e-05	4.48218	0.00824352	2.08389	TRUE	Positive
TRA2B	1.51973	0.000965801	3.01511	0.067463	1.17093	TRUE	Positive
NOA1	1.51396	0.000206723	3.68461	0.0243684	1.61317	TRUE	Positive
SETD2	1.51262	0.000100242	3.99895	0.0154234	1.81182	TRUE	Positive
BIRC6	1.51112	3.98237e-05	4.39986	0.00881332	2.05486	TRUE	Positive
SARNP	1.51033	0.000510565	3.29195	0.0457529	1.33958	TRUE	Positive
LIPT2	1.50713	2.27463e-05	4.64309	0.00665861	2.17662	TRUE	Positive
IBA57	1.50465	0.000236405	3.62634	0.0267885	1.57205	TRUE	Positive
HIGD2A	1.50431	3.4262e-05	4.46519	0.00824352	2.08389	TRUE	Positive
NDUFAF4	1.50309	0.000265944	3.57521	0.0283094	1.54807	TRUE	Positive
RMND1	1.4927	7.45494e-05	4.12756	0.0127125	1.89577	TRUE	Positive
RBM18	1.48789	0.00210613	2.67651	0.113262	0.945915	TRUE	Positive
RNMTL1	1.48782	5.599e-05	4.25189	0.0108067	1.96631	TRUE	Positive
MTIF3	1.4757	0.00022725	3.6435	0.0259183	1.58639	TRUE	Positive
UBA6	1.471	0.000834848	3.07839	0.0622104	1.20614	TRUE	Positive
FOXRED1	1.46699	0.000184171	3.73478	0.0231023	1.63634	TRUE	Positive
ENO1	1.46011	0.000148625	3.82791	0.0196275	1.70714	TRUE	Positive
NDUFAF3	1.45888	0.000835895	3.07785	0.0622104	1.20614	TRUE	Positive
NDUFB9	1.45687	5.1021e-05	4.29225	0.010101	1.99563	TRUE	Positive
CUL3	1.44569	0.00239263	2.62112	0.122163	0.913059	TRUE	Positive
UBR5	1.4433	4.9779e-05	4.30295	0.010101	1.99563	TRUE	Positive
WDR83	1.43972	0.000103823	3.98371	0.0156204	1.80631	TRUE	Positive
SRSF1	1.42936	0.000623169	3.20539	0.0520335	1.28372	TRUE	Positive
SMEK1	1.42764	0.000605913	3.21759	0.0516639	1.28681	TRUE	Positive
AMD1	1.41961	0.00015913	3.79825	0.0205512	1.68716	TRUE	Positive
UFSP2	1.41842	0.000109292	3.96141	0.0161312	1.79233	TRUE	Positive
INTS10	1.41535	0.000202637	3.69328	0.0243684	1.61317	TRUE	Positive
NDUFS2	1.40932	8.73817e-05	4.05858	0.0143863	1.84205	TRUE	Positive
CCND3	1.40712	0.000189776	3.72176	0.0233093	1.63247	TRUE	Positive
RBL1	1.39634	0.000244543	3.61165	0.0273576	1.56292	TRUE	Positive
GSK3B	1.39252	7.21577e-05	4.14172	0.0126738	1.89709	TRUE	Positive
UBQLN1	1.39025	0.000148532	3.82818	0.0196275	1.70714	TRUE	Positive
KDM5C	1.38793	0.000121653	3.91488	0.0172316	1.76368	TRUE	Positive
WHSC1	1.38698	0.00180374	2.74382	0.103949	0.983179	TRUE	Positive
CNOT1	1.3841	0.000369929	3.43188	0.0355051	1.44971	TRUE	Positive
TCERG1	1.38401	0.000336812	3.47261	0.0333891	1.4764	TRUE	Positive
TRIM71	1.37842	0.000739658	3.13097	0.0574839	1.24045	TRUE	Positive
TIPRL	1.37461	0.000367603	3.43462	0.0355051	1.44971	TRUE	Positive
FOXO3	1.37354	0.00013175	3.88025	0.0183655	1.736	TRUE	Positive
PRMT1	1.36391	0.00361167	2.44229	0.155861	0.807263	TRUE	Positive
GAST	1.35646	0.0137604	1.86137	0.306686	0.513306	TRUE	Positive
CHMP5	1.35416	0.000568028	3.24563	0.0496361	1.3042	TRUE	Positive
TCEB2	1.34571	0.00450184	2.34661	0.173021	0.761902	TRUE	Positive
CLPB	1.34184	0.000625089	3.20406	0.0520335	1.28372	TRUE	Positive
UBR4	1.34146	0.00259733	2.58547	0.128041	0.892651	TRUE	Positive
SPIN4	1.34121	0.00117213	2.93103	0.0788783	1.10304	TRUE	Positive
DNAJC7	1.34086	0.00013791	3.8604	0.018642	1.72951	TRUE	Positive
NDUFB5	1.33744	0.013519	1.86906	0.305203	0.515411	TRUE	Positive
CLASRP	1.32633	0.000456301	3.34075	0.0413117	1.38393	TRUE	Positive
NDUFB6	1.32612	0.000526613	3.27851	0.0469514	1.32835	TRUE	Positive
RMND5A	1.32316	0.000695011	3.15801	0.0557405	1.25383	TRUE	Positive
SAPCD2	1.31921	0.000279973	3.55288	0.0288158	1.54037	TRUE	Positive
RFX7	1.31406	0.0055355	2.25684	0.196415	0.706825	TRUE	Positive
PITRM1	1.31139	9.63511e-05	4.01614	0.0153272	1.81454	TRUE	Positive
GATAD2A	1.30562	0.000258039	3.58831	0.0279279	1.55396	TRUE	Positive
CCL25	1.29743	0.00558638	2.25287	0.197027	0.705475	TRUE	Positive
ATXN1L	1.29382	0.0165072	1.78233	0.339354	0.469347	TRUE	Positive
PPP2R1A	1.28926	0.00221156	2.6553	0.116299	0.934424	TRUE	Positive
BRD1	1.28809	0.000913778	3.03916	0.0665958	1.17655	TRUE	Positive
ZFYVE20	1.28708	0.00522236	2.28213	0.190697	0.719655	TRUE	Positive
SYNCRIP	1.2867	0.000133473	3.87461	0.0184592	1.73379	TRUE	Positive
PCYT1A	1.28533	0.000332916	3.47766	0.0332235	1.47855	TRUE	Positive
NDUFAF1	1.28189	0.00294561	2.53083	0.138333	0.859073	TRUE	Positive
MDH2	1.27922	0.000202952	3.69261	0.0243684	1.61317	TRUE	Positive
C12orf65	1.27139	0.000219307	3.65895	0.0253138	1.59664	TRUE	Positive
NOSIP	1.27127	0.000262621	3.58067	0.0281261	1.55089	TRUE	Positive
NDUFS8	1.2687	0.000906582	3.04259	0.0663467	1.17818	TRUE	Positive
PDSS1	1.26598	0.000428794	3.36775	0.0398921	1.39911	TRUE	Positive
LARP7	1.26536	0.000159024	3.79854	0.0205512	1.68716	TRUE	Positive
SS18	1.26067	0.000259181	3.5864	0.0279279	1.55396	TRUE	Positive
UBE2E1	1.25035	0.00109628	2.96008	0.0749225	1.12539	TRUE	Positive
UBN2	1.24281	0.00027154	3.56617	0.0287309	1.54165	TRUE	Positive
AIFM1	1.24268	0.00425833	2.37076	0.167698	0.775472	TRUE	Positive
CSDE1	1.23925	0.00707	2.15058	0.22254	0.652591	TRUE	Positive
NDUFA11	1.2325	0.00130988	2.88277	0.0833575	1.07906	TRUE	Positive
C19orf53	1.22803	0.000428407	3.36814	0.0398921	1.39911	TRUE	Positive
ESD	1.22753	0.00598792	2.22272	0.204226	0.68989	TRUE	Positive
DUS1L	1.22434	0.00225114	2.6476	0.117199	0.931075	TRUE	Positive
SKA2	1.22057	0.000276165	3.55883	0.0288158	1.54037	TRUE	Positive
PDS5B	1.21815	0.000220509	3.65657	0.0253138	1.59664	TRUE	Positive
CDKN1B	1.21696	0.00211577	2.67453	0.113297	0.945783	TRUE	Positive
NDUFB10	1.21636	0.000508898	3.29337	0.0457529	1.33958	TRUE	Positive
SKIV2L	1.21557	0.000561659	3.25053	0.0493249	1.30693	TRUE	Positive
C7orf26	1.21388	0.00113403	2.94538	0.0769037	1.11405	TRUE	Positive
CYB5R4	1.20758	0.000255182	3.59315	0.0279279	1.55396	TRUE	Positive
DHX35	1.20659	0.000632375	3.19902	0.0523917	1.28074	TRUE	Positive
HMSD	1.20527	0.0160817	1.79367	0.335861	0.47384	TRUE	Positive
HEXIM1	1.20507	0.00190483	2.72014	0.105541	0.976579	TRUE	Positive
NUBPL	1.20401	0.00161854	2.79088	0.0976842	1.01018	TRUE	Positive
CHD7	1.20189	0.000950449	3.02207	0.067463	1.17093	TRUE	Positive
ZIM3	1.19894	0.000280678	3.55179	0.0288158	1.54037	TRUE	Positive
DEAF1	1.19884	0.00424173	2.37246	0.167698	0.775472	TRUE	Positive
TIMM8A	1.19503	0.000429265	3.36727	0.0398921	1.39911	TRUE	Positive
PTPN1	1.19341	0.0014813	2.82936	0.0912895	1.03958	TRUE	Positive
ATXN7L3	1.1934	0.000657847	3.18188	0.0533652	1.27274	TRUE	Positive
ZNF800	1.19249	0.000252926	3.59701	0.0279279	1.55396	TRUE	Positive
EPT1	1.19094	0.00583015	2.23432	0.20118	0.696415	TRUE	Positive
SRSF5	1.19028	0.00045238	3.3445	0.0411689	1.38543	TRUE	Positive
ICT1	1.18879	0.00187349	2.72735	0.105468	0.976879	TRUE	Positive
SPTY2D1	1.18793	0.000278038	3.5559	0.0288158	1.54037	TRUE	Positive
GTPBP8	1.18625	0.000293361	3.5326	0.0296126	1.52852	TRUE	Positive
NDUFV1	1.18419	0.000957032	3.01907	0.067463	1.17093	TRUE	Positive
NOP2	1.18179	0.000702698	3.15323	0.0561009	1.25103	TRUE	Positive
TSC1	1.18164	0.00123488	2.90837	0.080035	1.09672	TRUE	Positive
L3MBTL2	1.17744	0.000810336	3.09134	0.061348	1.2122	TRUE	Positive
TACO1	1.17541	0.00341338	2.46681	0.151396	0.819887	TRUE	Positive
PCYT2	1.17474	0.000691008	3.16052	0.0556737	1.25435	TRUE	Positive
ATP5L	1.17442	0.00862635	2.06417	0.244376	0.611941	TRUE	Positive
TCIRG1	1.17355	0.00454907	2.34208	0.174074	0.759266	TRUE	Positive
NT5C3B	1.17279	0.0012344	2.90854	0.080035	1.09672	TRUE	Positive
NDUFB1	1.1727	0.00296459	2.52804	0.138853	0.857444	TRUE	Positive
ITPK1	1.1719	0.000602957	3.21971	0.0516639	1.28681	TRUE	Positive
MTA2	1.17071	0.00036607	3.43644	0.0355051	1.44971	TRUE	Positive
PDHB	1.16998	0.000278431	3.55528	0.0288158	1.54037	TRUE	Positive
MBTD1	1.16912	0.00118183	2.92744	0.0789267	1.10278	TRUE	Positive
ABCC6	1.1675	0.000642819	3.19191	0.0527592	1.2777	TRUE	Positive
UBA5	1.16695	0.000892058	3.04961	0.0655569	1.18338	TRUE	Positive
CNOT2	1.16664	0.000718106	3.14381	0.0565597	1.24749	TRUE	Positive
FKBPL	1.16489	0.000385498	3.41398	0.0365994	1.43653	TRUE	Positive
MTRF1	1.16481	0.00684609	2.16456	0.218696	0.660158	TRUE	Positive
E2F7	1.16449	0.00198386	2.70249	0.10923	0.961656	TRUE	Positive
NDUFAF6	1.16125	0.00207495	2.68299	0.112483	0.948915	TRUE	Positive
SLC6A7	1.16113	0.0055149	2.25846	0.19608	0.707566	TRUE	Positive
PPIB	1.16007	0.0215685	1.66618	0.382509	0.417358	TRUE	Positive
CAPRIN1	1.15716	0.00279307	2.55392	0.134404	0.871588	TRUE	Positive
OPA1	1.1569	0.0232345	1.63387	0.395054	0.403343	TRUE	Positive
NDUFS3	1.15539	0.0071605	2.14506	0.222596	0.652483	TRUE	Positive
SERPINB6	1.15523	0.00636159	2.19643	0.210424	0.676906	TRUE	Positive
ATPAF2	1.155	0.00448792	2.34795	0.173021	0.761902	TRUE	Positive
TMEM261	1.15448	0.00119645	2.92211	0.0792068	1.10124	TRUE	Positive
SAE1	1.15228	0.015145	1.81973	0.324795	0.488391	TRUE	Positive
C17orf75	1.15142	0.00108773	2.96348	0.0746286	1.12709	TRUE	Positive
LSM14A	1.14737	0.00240941	2.61809	0.122449	0.912044	TRUE	Positive
SAV1	1.14223	0.000728373	3.13765	0.0569093	1.24482	TRUE	Positive
KCMF1	1.13958	0.00319215	2.49592	0.145251	0.837881	TRUE	Positive
CSNK2B	1.13715	0.0117224	1.93098	0.287158	0.541879	TRUE	Positive
MAPK7	1.13646	0.000390641	3.40822	0.0368882	1.43311	TRUE	Positive
SFMBT1	1.13558	0.00153852	2.8129	0.0941552	1.02616	TRUE	Positive
NDUFA6	1.12154	0.00327042	2.4854	0.146909	0.83295	TRUE	Positive
ATMIN	1.12143	0.00043241	3.3641	0.0399729	1.39823	TRUE	Positive
HS6ST1	1.11851	0.00367407	2.43485	0.157387	0.803032	TRUE	Positive
RB1	1.11792	0.000791501	3.10155	0.0604432	1.21865	TRUE	Positive
ELMSAN1	1.11656	0.000931708	3.03072	0.067463	1.17093	TRUE	Positive
ZC3HAV1	1.11533	0.00096271	3.0165	0.067463	1.17093	TRUE	Positive
MINPP1	1.11184	0.00321897	2.49228	0.145832	0.836148	TRUE	Positive
NAE1	1.11176	0.00300186	2.52261	0.139853	0.854328	TRUE	Positive
UBE2L3	1.11025	0.0030129	2.52102	0.139996	0.853884	TRUE	Positive
CHAF1B	1.10512	0.00833048	2.07933	0.238301	0.622875	TRUE	Positive
NAIF1	1.1048	0.00124975	2.90318	0.0804195	1.09464	TRUE	Positive
ATP5A1	1.10138	0.00175395	2.75598	0.102688	0.988481	TRUE	Positive
PUS3	1.10069	0.000941651	3.02611	0.067463	1.17093	TRUE	Positive
TSR3	1.09982	0.00471921	2.32613	0.178638	0.748025	TRUE	Positive
NDUFA8	1.0983	0.000866925	3.06202	0.0639776	1.19397	TRUE	Positive
NXT1	1.09663	0.0006373	3.19566	0.0525518	1.27941	TRUE	Positive
KDM6A	1.09654	0.00598556	2.22289	0.204226	0.68989	TRUE	Positive
C1orf27	1.09625	0.00181396	2.74137	0.103949	0.983179	TRUE	Positive
NDUFA2	1.09479	0.0137134	1.86286	0.306506	0.513562	TRUE	Positive
CNOT10	1.09445	0.00615412	2.21083	0.207468	0.683048	TRUE	Positive
SUGT1	1.09416	0.00162955	2.78793	0.0976842	1.01018	TRUE	Positive
XPA	1.09274	0.00203978	2.69042	0.111948	0.950984	TRUE	Positive
EFNA2	1.09183	0.000995833	3.00181	0.0691337	1.16031	TRUE	Positive
NUDT5	1.09074	0.000960318	3.01758	0.067463	1.17093	TRUE	Positive
NDUFA5	1.08913	0.00526515	2.27859	0.191004	0.718957	TRUE	Positive
LARS2	1.07823	0.00117754	2.92903	0.0789267	1.10278	TRUE	Positive
MATN4	1.0777	0.00162857	2.78819	0.0976842	1.01018	TRUE	Positive
GSKIP	1.0776	0.00411694	2.38543	0.165399	0.781468	TRUE	Positive
NDUFA13	1.07747	0.00182044	2.73982	0.103949	0.983179	TRUE	Positive
MPV17L2	1.07715	0.0036392	2.43899	0.156664	0.805031	TRUE	Positive
STK40	1.07585	0.00383439	2.4163	0.161118	0.792857	TRUE	Positive
PRRC2B	1.07498	0.0014675	2.83342	0.0907576	1.04212	TRUE	Positive
ATP5SL	1.07348	0.00490489	2.30937	0.182593	0.738516	TRUE	Positive
SLC25A1	1.06991	0.00254336	2.59459	0.126456	0.898059	TRUE	Positive
MRPL54	1.06958	0.00339054	2.46973	0.151396	0.819887	TRUE	Positive
PARL	1.06873	0.000770416	3.11327	0.0593491	1.22659	TRUE	Positive
COX17	1.06836	0.00248846	2.60407	0.124522	0.904753	TRUE	Positive
MYLK3	1.06729	0.00180329	2.74393	0.103949	0.983179	TRUE	Positive
TET3	1.06668	0.0103185	1.98638	0.270512	0.567814	TRUE	Positive
COX15	1.06262	0.0130361	1.88485	0.301668	0.52047	TRUE	Positive
CANX	1.05792	0.00290609	2.53669	0.137211	0.862611	TRUE	Positive
PIK3R1	1.05696	0.0101452	1.99374	0.267553	0.57259	TRUE	Positive
THRB	1.05367	0.00317262	2.49858	0.145114	0.83829	TRUE	Positive
XPNPEP3	1.05059	0.00162445	2.78929	0.0976842	1.01018	TRUE	Positive
GADD45GIP1	1.04979	0.00164647	2.78345	0.0976981	1.01011	TRUE	Positive
CCL17	1.0456	0.010493	1.9791	0.271427	0.566348	TRUE	Positive
TOP2B	1.04532	0.00135089	2.86938	0.0850432	1.07036	TRUE	Positive
DCUN1D3	1.04282	0.019189	1.71695	0.365634	0.436953	TRUE	Positive
CREB1	1.04121	0.00208623	2.68064	0.112746	0.947898	TRUE	Positive
CTDNEP1	1.03949	0.00213366	2.67088	0.113908	0.943448	TRUE	Positive
NF1	1.0381	0.00263495	2.57923	0.128915	0.889698	TRUE	Positive
DLD	1.03592	0.00121804	2.91434	0.0796144	1.09901	TRUE	Positive
CNOT3	1.03569	0.00421661	2.37504	0.167558	0.775835	TRUE	Positive
BCS1L	1.03556	0.00189904	2.72147	0.105541	0.976579	TRUE	Positive
TMEM202	1.03549	0.00149411	2.82562	0.091757	1.03736	TRUE	Positive
LIAS	1.03234	0.001108	2.95546	0.0754297	1.12246	TRUE	Positive
GRHPR	1.02833	0.00550639	2.25913	0.19608	0.707566	TRUE	Positive
NKRF	1.02808	0.00101322	2.9943	0.0700639	1.15451	TRUE	Positive
HNRNPD	1.02503	0.0104667	1.98019	0.271147	0.566796	TRUE	Positive
SPON2	1.02449	0.0207041	1.68394	0.376445	0.424298	TRUE	Positive
RFXAP	1.02125	0.013302	1.87608	0.303818	0.517386	TRUE	Positive
UFC1	1.02006	0.00192233	2.71617	0.106175	0.973976	TRUE	Positive
B4GALT5	1.01821	0.0153702	1.81332	0.327623	0.484625	TRUE	Positive
PTGDR	1.01808	0.00395646	2.40269	0.162982	0.78786	TRUE	Positive
NGRN	1.01665	0.0009486	3.02292	0.067463	1.17093	TRUE	Positive
C12orf44	1.01614	0.00462005	2.33535	0.175746	0.755114	TRUE	Positive
DTX3L	1.01548	0.0086627	2.06235	0.244397	0.611904	TRUE	Positive
DBNL	1.01437	0.00371845	2.42964	0.157756	0.802015	TRUE	Positive
NDUFB8	1.01406	0.00133213	2.87545	0.0841668	1.07486	TRUE	Positive
METTL17	1.01404	0.00304925	2.51581	0.14094	0.850967	TRUE	Positive
FAM136A	1.01211	0.00590343	2.2289	0.202912	0.692693	TRUE	Positive
MON1A	1.0118	0.00224562	2.64866	0.117199	0.931075	TRUE	Positive
ZSCAN30	1.00984	0.00689613	2.16139	0.21903	0.659496	TRUE	Positive
R3HDM2	1.00765	0.0012162	2.91499	0.0796144	1.09901	TRUE	Positive
HIST1H4C	1.00544	0.00688907	2.16184	0.21903	0.659496	TRUE	Positive
HERC2	1.00537	0.00121933	2.91388	0.0796144	1.09901	TRUE	Positive
MLLT10	1.00466	0.0063018	2.20054	0.210189	0.67739	TRUE	Positive
WDR89	1.00465	0.00368366	2.43372	0.157387	0.803032	TRUE	Positive
SRSF11	1.00383	0.00350613	2.45517	0.15357	0.813692	TRUE	Positive
CNTROB	1.00179	0.00627537	2.20236	0.210189	0.67739	TRUE	Positive
BOLA3	1.00155	0.0103579	1.98473	0.270725	0.567472	TRUE	Positive
NSRP1	1.0012	0.0107093	1.97024	0.275174	0.560393	TRUE	Positive
CHD1	1.00052	0.0187343	1.72736	0.360799	0.442735	TRUE	Positive
KDM1A	0.999741	0.00526728	2.27841	0.191004	0.718957	TRUE	Positive
NDUFA1	0.996375	0.00238822	2.62193	0.122163	0.913059	TRUE	Positive
UFM1	0.994292	0.0171241	1.76639	0.344918	0.462284	TRUE	Positive
THAP7	0.994267	0.00584777	2.23301	0.201393	0.695956	TRUE	Positive
NFU1	0.993337	0.00349467	2.45659	0.15357	0.813692	TRUE	Positive
ZNF521	0.992971	0.00283709	2.54713	0.135778	0.867169	TRUE	Positive
BCL2L1	0.991675	0.00189378	2.72267	0.105541	0.976579	TRUE	Positive
ECSIT	0.991515	0.0141654	1.84877	0.311439	0.506628	TRUE	Positive
DNTTIP1	0.986115	0.00141097	2.85048	0.0885083	1.05302	TRUE	Positive
LRRC41	0.985255	0.00842605	2.07438	0.240252	0.619333	TRUE	Positive
RNF2	0.983478	0.0037927	2.42105	0.160001	0.795876	TRUE	Positive
ZFHX3	0.979624	0.00297262	2.52686	0.138859	0.857425	TRUE	Positive
ANKRD28	0.975972	0.0114487	1.94124	0.282821	0.548488	TRUE	Positive
CXorf56	0.972993	0.00351856	2.45363	0.153732	0.813237	TRUE	Positive
GGNBP2	0.970608	0.00950593	2.02201	0.256349	0.591169	TRUE	Positive
SUFU	0.969326	0.00340679	2.46765	0.151396	0.819887	TRUE	Positive
NMD3	0.969014	0.00615086	2.21106	0.207468	0.683048	TRUE	Positive
SIRT2	0.966904	0.00169445	2.77097	0.0998704	1.00056	TRUE	Positive
BSG	0.966242	0.00312581	2.50504	0.143559	0.842971	TRUE	Positive
PTPN9	0.965406	0.00745493	2.12756	0.225756	0.646361	TRUE	Positive
CCDC14	0.963628	0.00409819	2.38741	0.165399	0.781468	TRUE	Positive
PCIF1	0.962573	0.00853208	2.06895	0.242488	0.61531	TRUE	Positive
KLF1	0.960463	0.00935253	2.02907	0.255722	0.592231	TRUE	Positive
RBM10	0.959803	0.00561904	2.25034	0.197386	0.704684	TRUE	Positive
IPO11	0.95933	0.00770187	2.1134	0.229288	0.639618	TRUE	Positive
VPS37A	0.95917	0.00573252	2.24165	0.199774	0.699462	TRUE	Positive
USP8	0.958986	0.00974853	2.01106	0.260218	0.584663	TRUE	Positive
HEMK1	0.956109	0.00205871	2.6864	0.111948	0.950984	TRUE	Positive
CHD9	0.955962	0.0016458	2.78362	0.0976981	1.01011	TRUE	Positive
SUV420H1	0.955841	0.00292241	2.53426	0.137612	0.861344	TRUE	Positive
TNFRSF12A	0.952984	0.0121954	1.9138	0.291825	0.534877	TRUE	Positive
SMAD4	0.95105	0.00237289	2.62472	0.122163	0.913059	TRUE	Positive
PLAA	0.947659	0.00262679	2.58057	0.128874	0.889833	TRUE	Positive
BTAF1	0.947312	0.00276342	2.55855	0.133799	0.873547	TRUE	Positive
GGH	0.946983	0.00777135	2.1095	0.229791	0.638667	TRUE	Positive
DPH1	0.946422	0.00660435	2.18017	0.214216	0.669148	TRUE	Positive
TRIP12	0.943203	0.0233671	1.6314	0.395387	0.402977	TRUE	Positive
SFMBT2	0.941909	0.0131052	1.88256	0.30247	0.519317	TRUE	Positive
ATRX	0.941549	0.00346219	2.46065	0.152835	0.815777	TRUE	Positive
PNRC2	0.941399	0.00752203	2.12367	0.226458	0.645013	TRUE	Positive
PAGR1	0.940893	0.0148564	1.82809	0.320894	0.493638	TRUE	Positive
DDIT4	0.940458	0.00465718	2.33188	0.176671	0.752835	TRUE	Positive
KIAA0513	0.939	0.00870771	2.0601	0.244397	0.611904	TRUE	Positive
KLF7	0.938463	0.00369918	2.43189	0.157387	0.803032	TRUE	Positive
SELL	0.938148	0.0027399	2.56227	0.133677	0.873945	TRUE	Positive
RBBP7	0.936993	0.00246877	2.60752	0.12389	0.906964	TRUE	Positive
RBM20	0.935792	0.0120877	1.91766	0.290038	0.537545	TRUE	Positive
TFAP2C	0.934411	0.00353273	2.45189	0.153967	0.812572	TRUE	Positive
SMS	0.933281	0.00726526	2.13875	0.223002	0.651691	TRUE	Positive
KLK13	0.932055	0.0235259	1.62845	0.395794	0.402531	TRUE	Positive
RREB1	0.931476	0.0102813	1.98795	0.270331	0.568104	TRUE	Positive
SPRED1	0.930527	0.00205857	2.68643	0.111948	0.950984	TRUE	Positive
RB1CC1	0.928673	0.00685643	2.1639	0.218696	0.660158	TRUE	Positive
COA3	0.92837	0.00386973	2.41232	0.162215	0.789909	TRUE	Positive
RPUSD3	0.928003	0.00404033	2.39358	0.16532	0.781674	TRUE	Positive
CORO1C	0.926398	0.0158544	1.79985	0.333493	0.476914	TRUE	Positive
OTUB1	0.925396	0.00722384	2.14123	0.222596	0.652483	TRUE	Positive
KRT75	0.925269	0.00556794	2.25431	0.196771	0.706038	TRUE	Positive
ANKRD63	0.924737	0.0065778	2.18192	0.213949	0.66969	TRUE	Positive
TACC3	0.924286	0.00360951	2.44255	0.155861	0.807263	TRUE	Positive
OCIAD1	0.922664	0.003926	2.40605	0.162982	0.78786	TRUE	Positive
PPP2R5E	0.921946	0.00350078	2.45584	0.15357	0.813692	TRUE	Positive
MRPL41	0.920702	0.00481801	2.31713	0.180302	0.744	TRUE	Positive
SLC31A1	0.918103	0.00965917	2.01506	0.259013	0.586678	TRUE	Positive
BCL2	0.917775	0.004092	2.38806	0.165399	0.781468	TRUE	Positive
TRPC4	0.917398	0.0044281	2.35378	0.171689	0.765258	TRUE	Positive
CTPS1	0.915597	0.00686072	2.16363	0.218696	0.660158	TRUE	Positive
TMEM130	0.915479	0.00633741	2.19809	0.210366	0.677024	TRUE	Positive
E2F4	0.914887	0.00528965	2.27657	0.191167	0.718586	TRUE	Positive
TBL2	0.913746	0.0103747	1.98402	0.27076	0.567415	TRUE	Positive
EMILIN3	0.912425	0.00598817	2.22271	0.204226	0.68989	TRUE	Positive
NUP88	0.912389	0.021315	1.67131	0.380297	0.419877	TRUE	Positive
MTX1	0.91164	0.00289924	2.53772	0.137211	0.862611	TRUE	Positive
ITPA	0.911111	0.00246103	2.60888	0.12389	0.906964	TRUE	Positive
TNRC6C	0.909757	0.010616	1.97404	0.273803	0.562561	TRUE	Positive
C11orf87	0.907263	0.019258	1.71539	0.365634	0.436953	TRUE	Positive
PIGL	0.906849	0.00412622	2.38445	0.165399	0.781468	TRUE	Positive
GSS	0.906102	0.0117455	1.93013	0.287323	0.54163	TRUE	Positive
NUP37	0.905209	0.0218489	1.66057	0.384909	0.414642	TRUE	Positive
TYMS	0.902393	0.00278726	2.55482	0.134404	0.871588	TRUE	Positive
FBXL5	0.902279	0.00370079	2.43171	0.157387	0.803032	TRUE	Positive
GATAD2B	0.898204	0.00721659	2.14167	0.222596	0.652483	TRUE	Positive
IRF2BP1	0.89646	0.0135111	1.86931	0.305203	0.515411	TRUE	Positive
IFT88	0.895471	0.0129208	1.88871	0.301383	0.520882	TRUE	Positive
COQ6	0.893517	0.00684093	2.16488	0.218696	0.660158	TRUE	Positive
GSK3A	0.892564	0.00346324	2.46052	0.152835	0.815777	TRUE	Positive
ZNF330	0.892065	0.0107491	1.96863	0.275214	0.56033	TRUE	Positive
MTRF1L	0.891537	0.00413194	2.38385	0.165399	0.781468	TRUE	Positive
ISCA2	0.890762	0.00482454	2.31654	0.180302	0.744	TRUE	Positive
NANOS2	0.890694	0.00334175	2.47603	0.149731	0.824689	TRUE	Positive
WSB2	0.890585	0.00832515	2.07961	0.238301	0.622875	TRUE	Positive
PPWD1	0.890012	0.0119061	1.92423	0.288439	0.539946	TRUE	Positive
VEZF1	0.889401	0.0234593	1.62968	0.395794	0.402531	TRUE	Positive
GLTSCR2	0.887233	0.00408616	2.38868	0.165399	0.781468	TRUE	Positive
ACHE	0.886763	0.00565951	2.24722	0.19841	0.702436	TRUE	Positive
CDYL	0.885577	0.00326241	2.48646	0.146909	0.83295	TRUE	Positive
HIST1H1D	0.885558	0.00434527	2.36198	0.169601	0.770572	TRUE	Positive
CLPP	0.884794	0.0128746	1.89026	0.301105	0.521281	TRUE	Positive
PPP1CC	0.884364	0.0118811	1.92514	0.288439	0.539946	TRUE	Positive
PBX1	0.884363	0.00684086	2.16489	0.218696	0.660158	TRUE	Positive
KIF15	0.883539	0.0108882	1.96304	0.277161	0.557268	TRUE	Positive
TCEA1	0.88001	0.00784041	2.10566	0.230668	0.637012	TRUE	Positive
PTCHD4	0.879675	0.0168738	1.77279	0.34342	0.464174	TRUE	Positive
FAM124A	0.879125	0.0124727	1.90404	0.294847	0.530403	TRUE	Positive
GLRX5	0.878802	0.0223725	1.65029	0.38914	0.409895	TRUE	Positive
CPSF7	0.878321	0.00743119	2.12894	0.225426	0.646997	TRUE	Positive
AMER2	0.875159	0.0113548	1.94482	0.282089	0.549614	TRUE	Positive
ZNF354A	0.874655	0.00671356	2.17305	0.217158	0.663224	TRUE	Positive
MBTPS1	0.87433	0.0211831	1.67401	0.380297	0.419877	TRUE	Positive
SYT14	0.87414	0.00430272	2.36626	0.168968	0.772195	TRUE	Positive
GLUD1	0.873863	0.00811542	2.09069	0.235602	0.627821	TRUE	Positive
RAF1	0.873366	0.00560438	2.25147	0.197265	0.70495	TRUE	Positive
SUV39H1	0.872116	0.00474937	2.32336	0.178671	0.747945	TRUE	Positive
DERL2	0.87206	0.00449474	2.3473	0.173021	0.761902	TRUE	Positive
MTO1	0.871171	0.0041559	2.38133	0.165896	0.780164	TRUE	Positive
NTHL1	0.870019	0.00496345	2.30422	0.183533	0.736287	TRUE	Positive
PLXNA2	0.869467	0.0185125	1.73254	0.357704	0.446477	TRUE	Positive
RBM7	0.869444	0.0120858	1.91772	0.290038	0.537545	TRUE	Positive
RPAP2	0.868753	0.0132915	1.87643	0.303818	0.517386	TRUE	Positive
DRAP1	0.868496	0.00755419	2.12181	0.226458	0.645013	TRUE	Positive
MAZ	0.868382	0.0112231	1.94989	0.280812	0.551584	TRUE	Positive
GOLGA7	0.865362	0.00400376	2.39753	0.164304	0.784352	TRUE	Positive
SLC25A37	0.863876	0.00443978	2.35264	0.171763	0.765071	TRUE	Positive
ATP13A3	0.863541	0.00393693	2.40484	0.162982	0.78786	TRUE	Positive
USP48	0.862633	0.00376916	2.42375	0.159522	0.79718	TRUE	Positive
CNEP1R1	0.861887	0.0107894	1.967	0.275444	0.559966	TRUE	Positive
D2HGDH	0.860181	0.0177058	1.75188	0.350823	0.454912	TRUE	Positive
ZNF622	0.859606	0.0118342	1.92686	0.288439	0.539946	TRUE	Positive
ZFC3H1	0.859282	0.00941342	2.02625	0.25594	0.591861	TRUE	Positive
IFT74	0.856682	0.0163499	1.78649	0.337846	0.471281	TRUE	Positive
NR1H2	0.855831	0.00739856	2.13085	0.225214	0.647405	TRUE	Positive
CKAP2L	0.853589	0.00685835	2.16378	0.218696	0.660158	TRUE	Positive
CSNK2A1	0.853297	0.0120109	1.92043	0.289779	0.537934	TRUE	Positive
HCK	0.853256	0.00770213	2.11339	0.229288	0.639618	TRUE	Positive
HECTD1	0.853108	0.0120359	1.91952	0.289985	0.537624	TRUE	Positive
GATA6	0.852107	0.0179992	1.74475	0.353622	0.451461	TRUE	Positive
NDUFA3	0.851312	0.0167617	1.77568	0.342108	0.465836	TRUE	Positive
ATP9B	0.851046	0.00642112	2.19239	0.211308	0.675084	TRUE	Positive
TMEM70	0.850947	0.00591539	2.22802	0.202925	0.692663	TRUE	Positive
TMEM241	0.849981	0.00416548	2.38033	0.165901	0.78015	TRUE	Positive
B4GALT3	0.849824	0.0118941	1.92467	0.288439	0.539946	TRUE	Positive
KIAA0020	0.847743	0.00713384	2.14668	0.222596	0.652483	TRUE	Positive
KIAA1429	0.846027	0.0125581	1.90108	0.296465	0.528027	TRUE	Positive
MAF1	0.845526	0.00710292	2.14856	0.222596	0.652483	TRUE	Positive
PHF1	0.845502	0.01921	1.71647	0.365634	0.436953	TRUE	Positive
C8orf86	0.844684	0.00503216	2.29825	0.184905	0.73305	TRUE	Positive
ARIH2	0.844476	0.011077	1.95558	0.279135	0.554186	TRUE	Positive
C17orf96	0.840389	0.0108545	1.96439	0.276703	0.557986	TRUE	Positive
SLC25A19	0.838775	0.00577912	2.23814	0.200595	0.697679	TRUE	Positive
AKAP8L	0.837148	0.0134068	1.87268	0.304233	0.516793	TRUE	Positive
CLK3	0.836199	0.0188241	1.72528	0.361341	0.442083	TRUE	Positive
DAP3	0.834641	0.0150533	1.82237	0.323618	0.489967	TRUE	Positive
KHDRBS1	0.832942	0.0132142	1.87896	0.303205	0.518264	TRUE	Positive
MXD4	0.832803	0.0212169	1.67332	0.380297	0.419877	TRUE	Positive
ANKFY1	0.832764	0.00580177	2.23644	0.200595	0.697679	TRUE	Positive
MCPH1	0.829939	0.00782314	2.10662	0.230546	0.637242	TRUE	Positive
SRSF3	0.829878	0.0233893	1.63098	0.395387	0.402977	TRUE	Positive
SALL1	0.829246	0.00851753	2.06969	0.242467	0.615348	TRUE	Positive
MARCH4	0.827329	0.00717016	2.14447	0.222596	0.652483	TRUE	Positive
C5orf45	0.82641	0.0119056	1.92425	0.288439	0.539946	TRUE	Positive
NCL	0.822766	0.006945	2.15833	0.219925	0.657726	TRUE	Positive
PCBP3	0.821837	0.013371	1.87384	0.304233	0.516793	TRUE	Positive
MEIS2	0.821405	0.0069538	2.15778	0.219925	0.657726	TRUE	Positive
PIN4	0.820826	0.0136727	1.86415	0.306506	0.513562	TRUE	Positive
POLE4	0.819185	0.00973682	2.01158	0.260218	0.584663	TRUE	Positive
CARS2	0.816478	0.0132048	1.87927	0.303205	0.518264	TRUE	Positive
ATP5J	0.816291	0.00524457	2.28029	0.191004	0.718957	TRUE	Positive
MRPL35	0.816282	0.0234086	1.63062	0.395387	0.402977	TRUE	Positive
SCGB2A1	0.816149	0.0222348	1.65297	0.388589	0.41051	TRUE	Positive
SELRC1	0.81606	0.0237804	1.62378	0.398549	0.399518	TRUE	Positive
DES	0.815115	0.018465	1.73365	0.357629	0.446567	TRUE	Positive
SPOP	0.814774	0.006523	2.18555	0.213352	0.670904	TRUE	Positive
CLASP2	0.814691	0.0104335	1.98157	0.271147	0.566796	TRUE	Positive
ELMOD2	0.813472	0.0144151	1.84118	0.314909	0.501814	TRUE	Positive
AMDHD2	0.813093	0.00571434	2.24303	0.199774	0.699462	TRUE	Positive
LRIF1	0.812474	0.0124714	1.90409	0.294847	0.530403	TRUE	Positive
TNPO1	0.811891	0.00715262	2.14553	0.222596	0.652483	TRUE	Positive
RHOT2	0.810321	0.0113681	1.94431	0.282089	0.549614	TRUE	Positive
TEX19	0.809969	0.00753261	2.12305	0.226458	0.645013	TRUE	Positive
RAB3GAP2	0.809102	0.0055531	2.25546	0.196643	0.706322	TRUE	Positive
DUSP11	0.808563	0.0190405	1.72032	0.365095	0.437594	TRUE	Positive
HDHD2	0.808303	0.0141802	1.84832	0.311439	0.506628	TRUE	Positive
ANKRD49	0.808039	0.00715857	2.14517	0.222596	0.652483	TRUE	Positive
DPH5	0.807218	0.0130294	1.88508	0.301668	0.52047	TRUE	Positive
SIPA1	0.806456	0.0203377	1.6917	0.372484	0.428893	TRUE	Positive
PDILT	0.806399	0.0130131	1.88562	0.301668	0.52047	TRUE	Positive
SHB	0.805879	0.00726999	2.13847	0.223002	0.651691	TRUE	Positive
CMTR2	0.805439	0.0154419	1.8113	0.328753	0.483131	TRUE	Positive
RNF5	0.805422	0.00774637	2.1109	0.229654	0.638926	TRUE	Positive
DHODH	0.804946	0.0139177	1.85643	0.30865	0.510534	TRUE	Positive
MIER3	0.802872	0.0211657	1.67437	0.380297	0.419877	TRUE	Positive
HMGN2	0.802843	0.019495	1.71008	0.366203	0.436278	TRUE	Positive
MXD1	0.802136	0.00841175	2.07511	0.240234	0.619365	TRUE	Positive
GTPBP3	0.800946	0.00602199	2.22026	0.204585	0.689127	TRUE	Positive
MSC	0.800765	0.0107398	1.969	0.275214	0.56033	TRUE	Positive
NPRL2	0.799608	0.00736307	2.13294	0.224522	0.64874	TRUE	Positive
COQ7	0.79901	0.00742914	2.12906	0.225426	0.646997	TRUE	Positive
LY6G6F	0.798655	0.00926555	2.03313	0.254399	0.594484	TRUE	Positive
NAPG	0.797547	0.0174114	1.75917	0.347515	0.459026	TRUE	Positive
SLC6A16	0.797348	0.0122572	1.91161	0.292906	0.533272	TRUE	Positive
TMEM30B	0.797091	0.0136654	1.86438	0.306506	0.513562	TRUE	Positive
CAB39	0.796693	0.00906087	2.04283	0.251414	0.59961	TRUE	Positive
PCDP1	0.79647	0.0177169	1.75161	0.350823	0.454912	TRUE	Positive
FAM195A	0.795946	0.0112042	1.95062	0.280812	0.551584	TRUE	Positive
SURF2	0.792935	0.0141853	1.84816	0.311439	0.506628	TRUE	Positive
PALLD	0.791183	0.0101157	1.995	0.26728	0.573033	TRUE	Positive
CDKL3	0.789952	0.00775364	2.11049	0.229654	0.638926	TRUE	Positive
FAF2	0.789938	0.0129578	1.88747	0.301668	0.52047	TRUE	Positive
COA5	0.789069	0.0127017	1.89614	0.299053	0.524252	TRUE	Positive
BPIFA1	0.788698	0.010319	1.98636	0.270512	0.567814	TRUE	Positive
FGD4	0.788662	0.0196801	1.70597	0.367726	0.434476	TRUE	Positive
SPATA16	0.788409	0.0209193	1.67945	0.379182	0.421152	TRUE	Positive
FAM13A	0.788304	0.00934032	2.02964	0.255722	0.592231	TRUE	Positive
GJC3	0.788208	0.0103546	1.98487	0.270725	0.567472	TRUE	Positive
SMEK2	0.780375	0.00792677	2.1009	0.232347	0.633862	TRUE	Positive
WRAP53	0.780279	0.0109677	1.95988	0.277827	0.556226	TRUE	Positive
CAMSAP1	0.779755	0.00823783	2.08419	0.236807	0.625605	TRUE	Positive
TM2D2	0.779195	0.0197947	1.70345	0.368298	0.4338	TRUE	Positive
BRPF1	0.778951	0.0159564	1.79706	0.334837	0.475167	TRUE	Positive
LIPC	0.778128	0.00963132	2.01631	0.258661	0.587268	TRUE	Positive
MINA	0.775991	0.0180977	1.74238	0.354473	0.450417	TRUE	Positive
COLGALT2	0.775283	0.00809541	2.09176	0.23541	0.628175	TRUE	Positive
PODNL1	0.775024	0.0171235	1.76641	0.344918	0.462284	TRUE	Positive
ZDHHC2	0.774105	0.0181937	1.74008	0.355455	0.449215	TRUE	Positive
ARGLU1	0.773292	0.0156376	1.80583	0.331313	0.479762	TRUE	Positive
TRAF7	0.77238	0.00800615	2.09658	0.233201	0.63227	TRUE	Positive
RANBP10	0.77161	0.00708477	2.14967	0.222596	0.652483	TRUE	Positive
RNF7	0.768331	0.0208004	1.68193	0.377416	0.42318	TRUE	Positive
KIRREL	0.767695	0.0093763	2.02797	0.255722	0.592231	TRUE	Positive
SCO2	0.767185	0.0148669	1.82778	0.320894	0.493638	TRUE	Positive
DLAT	0.766188	0.0136555	1.86469	0.306506	0.513562	TRUE	Positive
MPG	0.764233	0.0109612	1.96014	0.277827	0.556226	TRUE	Positive
LUC7L	0.763651	0.00951601	2.02155	0.256349	0.591169	TRUE	Positive
RTCA	0.761047	0.00917229	2.03752	0.253305	0.596356	TRUE	Positive
MRPS34	0.760198	0.0130252	1.88521	0.301668	0.52047	TRUE	Positive
RALGAPA2	0.759733	0.0213252	1.67111	0.380297	0.419877	TRUE	Positive
ZNF592	0.759655	0.0128156	1.89226	0.300578	0.522042	TRUE	Positive
HNRNPA2B1	0.759654	0.0129161	1.88887	0.301383	0.520882	TRUE	Positive
HNRNPF	0.758835	0.0130709	1.8837	0.302075	0.519885	TRUE	Positive
RER1	0.758375	0.0193588	1.71312	0.366018	0.436498	TRUE	Positive
SPIDR	0.758231	0.0159532	1.79715	0.334837	0.475167	TRUE	Positive
MRPL9	0.756127	0.0199282	1.70053	0.368557	0.433495	TRUE	Positive
OSER1	0.755484	0.0233973	1.63083	0.395387	0.402977	TRUE	Positive
MECR	0.75543	0.021469	1.66819	0.382049	0.417881	TRUE	Positive
MRPS5	0.754775	0.0194429	1.71124	0.366018	0.436498	TRUE	Positive
DYNC1LI2	0.752727	0.0124354	1.90534	0.294847	0.530403	TRUE	Positive
PCGF6	0.752093	0.0120545	1.91885	0.290035	0.537549	TRUE	Positive
GSTO1	0.751971	0.00868663	2.06115	0.244397	0.611904	TRUE	Positive
ZMIZ1	0.750998	0.0168511	1.77337	0.343356	0.464255	TRUE	Positive
GJA3	0.750876	0.0153083	1.81507	0.326701	0.48585	TRUE	Positive
POC5	0.750742	0.0104154	1.98232	0.271147	0.566796	TRUE	Positive
AKAP11	0.745918	0.0135991	1.86649	0.306506	0.513562	TRUE	Positive
CELSR3	0.743967	0.011129	1.95354	0.28003	0.552795	TRUE	Positive
KIAA1468	0.743904	0.0105466	1.97689	0.272412	0.564774	TRUE	Positive
MRPS22	0.743328	0.0110249	1.95763	0.27822	0.555611	TRUE	Positive
CWC22	0.743157	0.0172388	1.76349	0.345455	0.461609	TRUE	Positive
CKAP2	0.743	0.0177746	1.7502	0.351213	0.454429	TRUE	Positive
UBR7	0.742173	0.0199345	1.7004	0.368557	0.433495	TRUE	Positive
ENO3	0.740846	0.0223832	1.65008	0.38914	0.409895	TRUE	Positive
PFKFB4	0.74014	0.0156613	1.80517	0.331415	0.479628	TRUE	Positive
PREPL	0.739997	0.0167598	1.77573	0.342108	0.465836	TRUE	Positive
CHRAC1	0.739212	0.0133954	1.87305	0.304233	0.516793	TRUE	Positive
CD93	0.73882	0.0109935	1.95886	0.277827	0.556226	TRUE	Positive
MPC1	0.738569	0.0143061	1.84448	0.313308	0.504029	TRUE	Positive
KIAA0430	0.737751	0.0143466	1.84325	0.313804	0.503342	TRUE	Positive
GCSH	0.737453	0.0212613	1.67241	0.380297	0.419877	TRUE	Positive
ARFGAP2	0.733062	0.0138117	1.85975	0.306686	0.513306	TRUE	Positive
ZDHHC1	0.732294	0.0223963	1.64982	0.38914	0.409895	TRUE	Positive
SNRPB2	0.732037	0.0100517	1.99776	0.266689	0.573995	TRUE	Positive
MUC4	0.731751	0.0107162	1.96996	0.275174	0.560393	TRUE	Positive
LTB4R	0.731679	0.0113603	1.94461	0.282089	0.549614	TRUE	Positive
ALG9	0.730822	0.0213033	1.67155	0.380297	0.419877	TRUE	Positive
TRIM8	0.730395	0.0126443	1.8981	0.298101	0.525637	TRUE	Positive
OSGEPL1	0.730006	0.0104614	1.98041	0.271147	0.566796	TRUE	Positive
MRPS23	0.728409	0.0107155	1.96999	0.275174	0.560393	TRUE	Positive
RHOT1	0.727789	0.0226774	1.64441	0.390216	0.408695	TRUE	Positive
SOD2	0.725592	0.0234117	1.63057	0.395387	0.402977	TRUE	Positive
BRAP	0.72533	0.0140411	1.8526	0.310993	0.507249	TRUE	Positive
RBM34	0.723513	0.0124401	1.90518	0.294847	0.530403	TRUE	Positive
LARP4B	0.722846	0.0141357	1.84968	0.311439	0.506628	TRUE	Positive
ZDHHC5	0.72279	0.0147081	1.83244	0.319324	0.495769	TRUE	Positive
LATS2	0.722787	0.0179341	1.74632	0.352738	0.452548	TRUE	Positive
GPR27	0.722564	0.0162443	1.7893	0.337563	0.471645	TRUE	Positive
CRISP3	0.721264	0.0174996	1.75697	0.34888	0.457324	TRUE	Positive
LRTOMT	0.721121	0.0183719	1.73585	0.357347	0.44691	TRUE	Positive
DPH6	0.721022	0.0111444	1.95294	0.28003	0.552795	TRUE	Positive
PSKH2	0.720787	0.0150825	1.82153	0.323849	0.489658	TRUE	Positive
OR6C4	0.718563	0.0113125	1.94644	0.282089	0.549614	TRUE	Positive
RSF1	0.718355	0.01571	1.80382	0.331523	0.479486	TRUE	Positive
C2orf49	0.717773	0.0213183	1.67125	0.380297	0.419877	TRUE	Positive
SCAP	0.716322	0.0144906	1.83891	0.315772	0.500626	TRUE	Positive
NECAP1	0.715891	0.0239944	1.61989	0.399918	0.398029	TRUE	Positive
RPL38	0.714548	0.023874	1.62208	0.399438	0.398551	TRUE	Positive
COX4I1	0.71431	0.012835	1.8916	0.300578	0.522042	TRUE	Positive
TRMT10A	0.713655	0.0227615	1.6428	0.390216	0.408695	TRUE	Positive
WWP1	0.711897	0.0196239	1.70721	0.367457	0.434793	TRUE	Positive
KCNC2	0.711821	0.0119907	1.92116	0.289779	0.537934	TRUE	Positive
THUMPD1	0.711392	0.013234	1.87831	0.303205	0.518264	TRUE	Positive
STX8	0.709121	0.015723	1.80346	0.331523	0.479486	TRUE	Positive
ALS2	0.708054	0.0202646	1.69326	0.37192	0.429551	TRUE	Positive
IL37	0.707138	0.0145104	1.83832	0.315813	0.50057	TRUE	Positive
TP53BP1	0.705023	0.0134055	1.87272	0.304233	0.516793	TRUE	Positive
NSUN3	0.704465	0.0162673	1.78868	0.337563	0.471645	TRUE	Positive
TCP10L	0.701684	0.0216519	1.6645	0.383127	0.416657	TRUE	Positive
CCIN	0.701263	0.0171632	1.7654	0.344956	0.462236	TRUE	Positive
FOXP1	0.698368	0.0191771	1.71722	0.365634	0.436953	TRUE	Positive
ANKRD11	0.696175	0.0240215	1.6194	0.399918	0.398029	TRUE	Positive
KIAA2018	0.69552	0.0210823	1.67608	0.380297	0.419877	TRUE	Positive
CASC3	0.69404	0.0225466	1.64692	0.38914	0.409895	TRUE	Positive
RBFA	0.693563	0.0179294	1.74643	0.352738	0.452548	TRUE	Positive
SMIM20	0.691293	0.0200875	1.69708	0.370114	0.431665	TRUE	Positive
PDSS2	0.686996	0.0160362	1.7949	0.335309	0.474555	TRUE	Positive
HPS4	0.684546	0.0235494	1.62802	0.395809	0.402514	TRUE	Positive
HEATR5A	0.683748	0.0184679	1.73358	0.357629	0.446567	TRUE	Positive
SPATC1L	0.681843	0.0213775	1.67004	0.380805	0.419297	TRUE	Positive
PRPF4B	0.680369	0.0161825	1.79095	0.33716	0.472164	TRUE	Positive
MCEE	0.679484	0.015632	1.80598	0.331313	0.479762	TRUE	Positive
GFM2	0.678822	0.0207011	1.68401	0.376445	0.424298	TRUE	Positive
APLNR	0.67858	0.0163307	1.78699	0.337846	0.471281	TRUE	Positive
MMAA	0.678555	0.0181233	1.74176	0.354473	0.450417	TRUE	Positive
TRIT1	0.67714	0.0170885	1.7673	0.344918	0.462284	TRUE	Positive
MAPRE2	0.677058	0.0209497	1.67882	0.379341	0.42097	TRUE	Positive
CWC27	0.676801	0.020551	1.68717	0.375216	0.425719	TRUE	Positive
THAP3	0.676364	0.0176113	1.75421	0.349914	0.456038	TRUE	Positive
MYRF	0.675532	0.0167704	1.77546	0.342108	0.465836	TRUE	Positive
C11orf63	0.675245	0.0184565	1.73385	0.357629	0.446567	TRUE	Positive
FAM187B	0.672909	0.0164906	1.78276	0.339354	0.469347	TRUE	Positive
TNFSF11	0.67111	0.0195323	1.70925	0.366203	0.436278	TRUE	Positive
SUGP1	0.66974	0.0165195	1.782	0.339354	0.469347	TRUE	Positive
SP7	0.666974	0.0177966	1.74966	0.351213	0.454429	TRUE	Positive
PQLC1	0.662878	0.0211806	1.67406	0.380297	0.419877	TRUE	Positive
RAB43	0.657951	0.0184967	1.73291	0.357704	0.446477	TRUE	Positive
RNF24	0.656229	0.021968	1.65821	0.385314	0.414185	TRUE	Positive
POLRMT	0.655925	0.0203211	1.69205	0.372484	0.428893	TRUE	Positive
SAMD15	0.655301	0.0227944	1.64217	0.390216	0.408695	TRUE	Positive
DUPD1	0.655036	0.0191322	1.71823	0.365634	0.436953	TRUE	Positive
NEK8	0.65481	0.0227748	1.64254	0.390216	0.408695	TRUE	Positive
SLC25A28	0.649983	0.0216605	1.66433	0.383127	0.416657	TRUE	Positive
CLEC14A	0.648996	0.022164	1.65435	0.387737	0.411463	TRUE	Positive
TRNAU1AP	0.644131	0.0209727	1.67834	0.379367	0.42094	TRUE	Positive
CLDN6	0.638537	0.0225507	1.64684	0.38914	0.409895	TRUE	Positive
ICAM3	0.635173	0.0227001	1.64397	0.390216	0.408695	TRUE	Positive
FASTKD3	0.6315	0.0230415	1.63749	0.392533	0.406124	TRUE	Positive
ZNF324B	0.624668	0.0236548	1.62608	0.396822	0.401404	TRUE	Positive

## Sheet: ProteinsRemovedFromAnalysis
Sensitive Genes Removed from Analysis		Resistant Genes Removed from Analysis
KCTD5		TLK2
TMED10		SNX27
MSH6		MRPS31
DCAF15		SHMT2
RSBN1L		COQ5
GPM6B		FLCN
RASA2		RCOR1
OR7A17		F2R
RCE1		LAMTOR3
SETD1A		HCCS
MAP10		COX7C
CDK13		FASTKD5
CNOT4		UBE2V2
		LAMTOR2
		LAMTOR1
		VPS39
		MRPL4
		PEPD
		PPM1G
		HPS1
