# Supplementary material for: The PRC2.1 subcomplex opposes G1 progression through regulation of CCND1 and CCND2
Source: eLife. 2025 Feb 4;13:RP97577. doi: 10.7554/eLife.97577 (PMC11793871; doi:10.7554/eLife.97577)
Supplement: Supplementary file 3. [file elife-97577-supp3.xlsx]

## Sheet: MTF2Ko_Mock_CUTRUN
Chr	Start	End	Ensembl	Gene	Strand	TSS	Type	baseMean	log2FoldChange	lfcSE	stat	pvalue	padj
chr16	86562829	86567829	ENSG00000176692.8	FOXC2	+	86566829	protein_coding	11.0594	-7.71748	1.59939	-4.82527	1.3981e-06	5.33022e-05
chr1	37033515	37038515	ENSG00000163873.10	GRIK3	-	37034515	protein_coding	82.9042	-6.7603	0.813255	-8.31265	9.35882e-17	3.62542e-14
chr20	18055493	18060493	ENSG00000229262.1	ENSG00000229262	+	18059493	lncRNA	88.612	-6.52982	0.679354	-9.6118	7.12889e-22	1.01916e-18
chr16	88877038	88882038	ENSG00000259881.1	ENSG00000259881	+	88881038	lncRNA	31.0957	-6.41086	1.1082	-5.78492	7.25478e-09	5.05343e-07
chr17	34578369	34583369	ENSG00000197322.4	TMEM132E-DT	-	34579369	lncRNA	79.2253	-6.23244	0.680034	-9.16489	4.95954e-20	4.07932e-17
chr5	129904917	129909917	ENSG00000251680.6	ENSG00000251680	-	129905917	lncRNA	81.6517	-5.98647	0.674513	-8.87524	6.97816e-19	4.55431e-16
chr11	101125077	101130077	ENSG00000282728.1	PGR-AS1	+	101129077	lncRNA	109.139	-5.86334	0.583855	-10.0425	9.91771e-24	2.9775e-20
chr2	282419	287419	ENSG00000228643.1	ENSG00000228643	+	286419	lncRNA	29.3898	-5.74833	1.15434	-4.97976	6.36633e-07	2.67876e-05
chr16	89167748	89172748	ENSG00000129910.8	CDH15	+	89171748	protein_coding	4.33505	-5.69927	1.80871	-3.15102	0.00162704	0.01943
chrX	120943483	120948483	ENSG00000271041.1	ENSG00000271041	+	120947483	processed_pseudogene	3.52317	-5.68993	1.94598	-2.92394	0.00345634	NA
chr16	88935789	88940789	ENSG00000205018.2	ENSG00000205018	+	88939789	lncRNA	81.1653	-5.64782	0.611778	-9.23181	2.66106e-20	2.61936e-17
chr11	114058441	114063441	ENSG00000289230.1	ENSG00000289230	-	114059441	lncRNA	94.1713	-5.58396	0.557457	-10.0168	1.28559e-23	3.50874e-20
chrX	52706178	52711178	ENSG00000241476.9	SSX2	-	52707178	protein_coding	17.0716	-5.56009	1.19862	-4.63876	3.50514e-06	0.000117643
chrX	120975068	120980068	ENSG00000236126.3	CT47A3	-	120976068	protein_coding	4.52928	-5.55768	1.76356	-3.15139	0.00162494	0.0194125
chr20	63174500	63179500	ENSG00000207598.1	MIR124-3	+	63178500	miRNA	38.7531	-5.4733	0.780674	-7.011	2.3662e-12	3.74871e-10
chr10	131091218	131096218	ENSG00000230098.1	TCERG1L-AS1	+	131095218	lncRNA	93.6933	-5.46888	0.549145	-9.95891	2.3057e-23	5.53774e-20
chr9	29210299	29215299	ENSG00000287038.3	ENSG00000287038	+	29214299	lncRNA	45.0935	-5.46439	0.664577	-8.22236	1.99535e-16	7.44152e-14
chr16	88938651	88943651	ENSG00000261226.1	ENSG00000261226	-	88939651	lncRNA	42.9898	-5.45833	0.768102	-7.10626	1.19231e-12	1.99849e-10
chr8	24955721	24960721	ENSG00000277586.4	NEFL	-	24956721	protein_coding	104.553	-5.40838	0.525625	-10.2894	7.86428e-25	2.77766e-21
chr11	35137951	35142951	ENSG00000255521.3	CD44-DT	-	35138951	lncRNA	110.813	-5.38923	0.513401	-10.4971	8.90629e-26	5.34769e-22
chr19	3605875	3610875	ENSG00000006638.13	TBXA2R	-	3606875	protein_coding	4.57214	-5.37355	1.90802	-2.8163	0.004858	0.0427315
chrX	41471653	41476653	ENSG00000225238.1	GEMIN7P1	-	41472653	processed_pseudogene	3.12274	-5.37193	2.0529	-2.61675	0.00887709	NA
chrX	83504290	83509290	ENSG00000196767.9	POU3F4	+	83508290	protein_coding	42.3142	-5.35378	0.661322	-8.09557	5.69969e-16	1.90129e-13
chr2	129979466	129984466	ENSG00000225449.3	RAB6C-AS1	-	129980466	transcribed_unprocessed_pseudogene	70.8452	-5.33055	0.616721	-8.64338	5.45741e-18	2.87443e-15
chr10	132785147	132790147	ENSG00000148826.9	NKX6-2	-	132786147	protein_coding	37.4724	-5.29137	0.904471	-5.85024	4.90877e-09	3.54257e-07
chr8	228137	233137	ENSG00000172748.14	ZNF596	+	232137	protein_coding	9.77536	-5.27631	1.57367	-3.35287	0.000799795	0.0112151
chrX	151176836	151181836	ENSG00000234696.1	GPR50-AS1	-	151177836	lncRNA	103.555	-5.26917	0.524953	-10.0374	1.04381e-23	2.98449e-20
chr18	5891745	5896745	ENSG00000266846.2	ENSG00000266846	+	5895745	lncRNA	79.3082	-5.26256	0.564554	-9.32162	1.14579e-20	1.25087e-17
chr17	79128722	79133722	ENSG00000266711.1	ENSG00000266711	+	79132722	lncRNA	135.409	-5.25577	0.489588	-10.7351	6.96562e-27	6.97073e-23
chrX	21373265	21378265	ENSG00000283380.1	ENSG00000283380	-	21374265	lncRNA	71.0597	-5.24964	0.551549	-9.51799	1.76568e-21	2.35597e-18
chr8	4492392	4497392	ENSG00000288110.1	ENSG00000288110	+	4496392	lncRNA	77.2064	-5.24578	0.572088	-9.16954	4.75053e-20	3.96167e-17
chr9	135339249	135344249	ENSG00000178243.4	LINC02907	+	135343249	lncRNA	21.788	-5.22945	0.920873	-5.6788	1.35644e-08	8.82408e-07
chrX	1763347	1768347	ENSG00000234622.6	ENSG00000234622	+	1767347	lncRNA	32.7239	-5.22227	0.904463	-5.77389	7.74625e-09	5.32472e-07
chr19	16495167	16500167	ENSG00000269058.6	CALR3	-	16496167	protein_coding	4.23636	-5.2116	1.81803	-2.86662	0.00414874	0.0383006
chr12	109052986	109057986	ENSG00000256262.3	USP30-AS1	-	109053986	lncRNA	5.67541	-5.21055	1.77371	-2.93765	0.00330712	0.0326385
chr16	88976207	88981207	ENSG00000129993.15	CBFA2T3	-	88977207	protein_coding	50.2135	-5.20258	0.658825	-7.89676	2.8625e-15	8.55106e-13
chr8	24952867	24957867	ENSG00000283327.1	MIR6841	-	24953867	miRNA	95.6586	-5.18428	0.531116	-9.7611	1.65359e-22	3.20284e-19
chr20	62473870	62478870	ENSG00000272050.1	ENSG00000272050	+	62477870	lncRNA	93.2533	-5.16506	0.553185	-9.33695	9.91496e-21	1.10247e-17
chr16	86566847	86571847	ENSG00000260944.3	FOXC2-AS1	-	86567847	lncRNA	20.9178	-5.05323	0.818262	-6.17557	6.59247e-10	5.87297e-08
chr1	2800693	2805693	ENSG00000215912.13	TTC34	-	2801693	protein_coding	79.889	-5.05295	0.553828	-9.1237	7.26055e-20	5.51838e-17
chr13	107864823	107869823	ENSG00000286343.1	ENSG00000286343	+	107868823	lncRNA	66.4959	-5.02559	0.917742	-5.47604	4.34958e-08	2.49204e-06
chr19	17421324	17426324	ENSG00000269481.1	ENSG00000269481	-	17422324	lncRNA	5.6512	-5.00761	1.89955	-2.63622	0.0083836	0.0613286
chr16	88464918	88469918	ENSG00000263456.1	MIR5189	+	88468918	miRNA	3.44124	-4.98738	1.95577	-2.55008	0.0107698	NA
chr19	29525948	29530948	ENSG00000266248.1	ENSG00000266248	-	29526948	lncRNA	20.1243	-4.9821	0.899932	-5.53608	3.09316e-08	1.82981e-06
chr12	123598077	123603077	ENSG00000111364.16	DDX55	+	123602077	protein_coding	5.14437	-4.96701	1.8051	-2.75165	0.00592953	0.0488653
chrX	54526183	54531183	ENSG00000130119.17	GNL3L	+	54530183	protein_coding	3.43594	-4.9658	1.89413	-2.62168	0.00874977	NA
chrY	5015076	5020076	ENSG00000252468.1	RNU2-57P	+	5019076	snRNA	2.2064	-4.96325	2.26043	-2.19572	0.0281123	NA
chr1	18626846	18631846	ENSG00000009709.12	PAX7	+	18630846	protein_coding	111.419	-4.95697	0.486513	-10.1888	2.22531e-24	7.42312e-21
chrX	47649604	47654604	ENSG00000126767.18	ELK1	-	47650604	protein_coding	4.81532	-4.94656	1.85528	-2.66621	0.00767125	0.0578804
chr10	133083924	133088924	ENSG00000197177.16	ADGRA1	+	133087924	protein_coding	87.6762	-4.93016	0.543214	-9.07591	1.12735e-19	8.3569e-17
chr16	86895356	86900356	ENSG00000287161.1	ENSG00000287161	+	86899356	lncRNA	37.1546	-4.8907	0.660536	-7.40413	1.32008e-13	2.69603e-11
chr19	50513690	50518690	ENSG00000204653.10	ASPDH	-	50514690	protein_coding	9.26466	-4.86687	1.59182	-3.05743	0.00223243	0.0246105
chr13	111114678	111119678	ENSG00000235875.3	ARHGEF7-AS2	-	111115678	lncRNA	63.8033	-4.86362	0.522154	-9.31453	1.22494e-20	1.3134e-17
chr8	24951941	24956941	ENSG00000272157.2	ENSG00000272157	+	24955941	lncRNA	85.5848	-4.84063	0.502067	-9.6414	5.34538e-22	7.89824e-19
chrX	23330849	23335849	ENSG00000165186.12	PTCHD1	+	23334849	protein_coding	86.8133	-4.81471	0.494485	-9.73682	2.10021e-22	3.94077e-19
chr14	104136024	104141024	ENSG00000289840.1	ENSG00000289840	-	104137024	lncRNA	12.2163	-4.81467	1.25447	-3.838	0.000124041	0.00247356
chr19	53958937	53963937	ENSG00000142408.7	CACNG8	+	53962937	protein_coding	82.2558	-4.81253	0.523729	-9.18897	3.96628e-20	3.50222e-17
chr8	1301607	1306607	ENSG00000275427.1	ENSG00000275427	-	1302607	lncRNA	64.3267	-4.8123	0.624889	-7.70105	1.34954e-14	3.52313e-12
chr12	119175484	119180484	ENSG00000256884.1	ENSG00000256884	-	119176484	lncRNA	76.0403	-4.80055	0.559389	-8.58176	9.34293e-18	4.63626e-15
chr9	29212601	29217601	ENSG00000174482.11	LINGO2	-	29213601	protein_coding	47.6508	-4.77473	0.553039	-8.63363	5.94347e-18	3.10321e-15
chr2	34063226	34068226	ENSG00000237790.1	LINC01318	+	34067226	lncRNA	22.021	-4.73388	1.15986	-4.08142	4.47614e-05	0.00105647
chr14	25049147	25054147	ENSG00000168952.16	STXBP6	-	25050147	protein_coding	64.8621	-4.70385	0.92738	-5.07219	3.9326e-07	1.75561e-05
chr6	159169007	159174007	ENSG00000233682.3	FNDC1-AS1	-	159170007	lncRNA	94.3365	-4.69741	0.451539	-10.4031	2.39972e-25	1.20074e-21
chr7	68636798	68641798	ENSG00000228429.1	ENSG00000228429	+	68640798	processed_pseudogene	29.8185	-4.69059	0.851033	-5.51164	3.55512e-08	2.08869e-06
chr6	72621073	72626073	ENSG00000285844.2	KCNQ5-DT	-	72622073	lncRNA	61.5371	-4.67842	0.536529	-8.7198	2.78701e-18	1.59374e-15
chr16	49278021	49283021	ENSG00000279249.4	ENSG00000279249	+	49282021	lncRNA	61.0085	-4.6596	0.605332	-7.6976	1.38645e-14	3.60382e-12
chr20	62550526	62555526	ENSG00000174403.17	CRMA	-	62551526	lncRNA	98.8549	-4.6595	0.473562	-9.83926	7.6271e-23	1.69615e-19
chr20	63355988	63360988	ENSG00000203900.2	ENSG00000203900	+	63359988	lncRNA	48.1452	-4.64626	0.701935	-6.61922	3.61095e-11	4.37128e-09
chr9	137168270	137173270	ENSG00000263697.1	MIR3621	-	137169270	miRNA	52.3628	-4.64055	0.565757	-8.20237	2.35697e-16	8.63969e-14
chr2	129975666	129980666	ENSG00000222014.6	RAB6C	+	129979666	protein_coding	96.3556	-4.6345	0.523156	-8.85872	8.09353e-19	5.22546e-16
chr20	62550306	62555306	ENSG00000199017.2	MIR1-1	+	62554306	miRNA	98.1719	-4.62839	0.463657	-9.98235	1.82103e-23	4.75399e-20
chr20	57999904	58004904	ENSG00000275852.1	LINC01742	+	58003904	lncRNA	44.5203	-4.61632	0.657902	-7.01673	2.27123e-12	3.62695e-10
chr5	37839041	37844041	ENSG00000168621.15	GDNF	-	37840041	protein_coding	79.3066	-4.61341	0.523442	-8.8136	1.21185e-18	7.5796e-16
chr10	1736525	1741525	ENSG00000185736.16	ADARB2	-	1737525	protein_coding	120.773	-4.58612	0.473492	-9.68574	3.46701e-22	5.62631e-19
chrX	105818539	105823539	ENSG00000123572.17	NRK	+	105822539	protein_coding	62.963	-4.5857	0.545544	-8.40574	4.25167e-17	1.82348e-14
chr4	81214222	81219222	ENSG00000138669.10	PRKG2	-	81215222	protein_coding	112.563	-4.55325	0.48142	-9.45796	3.14022e-21	3.92815e-18
chr8	78801293	78806293	ENSG00000285744.1	ENSG00000285744	+	78805293	lncRNA	83.2262	-4.5377	0.492565	-9.2124	3.18928e-20	3.03963e-17
chrX	151178386	151183386	ENSG00000269993.1	ENSG00000269993	+	151182386	lncRNA	96.6558	-4.51923	0.492161	-9.18243	4.21475e-20	3.66768e-17
chr16	32083785	32088785	ENSG00000261727.2	ENSG00000261727	-	32084785	transcribed_processed_pseudogene	80.635	-4.49912	0.513332	-8.76453	1.87555e-18	1.13753e-15
chr16	86300303	86305303	ENSG00000268754.4	LINC01081	-	86301303	lncRNA	29.432	-4.49524	0.766812	-5.86225	4.5665e-09	3.32756e-07
chr17	14297081	14302081	ENSG00000125430.9	HS3ST3B1	+	14301081	protein_coding	80.9327	-4.49389	0.496717	-9.04719	1.467e-19	1.06126e-16
chr12	113467981	113472981	ENSG00000257935.4	LHX5-AS1	+	113471981	lncRNA	140.503	-4.4882	0.419692	-10.694	1.08556e-26	9.31165e-23
chr11	129371848	129376848	ENSG00000043039.7	BARX2	+	129375848	protein_coding	153.962	-4.48767	0.421637	-10.6434	1.87083e-26	1.40415e-22
chr9	137169051	137174051	ENSG00000184709.7	LRRC26	-	137170051	protein_coding	41.9144	-4.44867	0.606783	-7.33157	2.27468e-13	4.4201e-11
chrX	8731137	8736137	ENSG00000011201.12	ANOS1	-	8732137	protein_coding	83.0798	-4.44324	0.787242	-5.64406	1.66086e-08	1.04973e-06
chr8	1368833	1373833	ENSG00000260721.1	ENSG00000260721	-	1369833	lncRNA	90.7789	-4.4415	0.507934	-8.74425	2.2451e-18	1.30879e-15
chr17	38451444	38456444	ENSG00000276170.6	ENSG00000276170	-	38452444	lncRNA	69.9142	-4.43054	0.491291	-9.01817	1.9126e-19	1.35861e-16
chr16	88980032	88985032	ENSG00000259989.1	ENSG00000259989	+	88984032	lncRNA	55.9351	-4.4275	0.567331	-7.8041	5.99293e-15	1.72172e-12
chr16	87399295	87404295	ENSG00000261592.1	ENSG00000261592	-	87400295	lncRNA	2.9669	-4.42387	2.13719	-2.06994	0.0384575	NA
chr5	1879315	1884315	ENSG00000249116.2	IRX4-AS1	+	1883315	lncRNA	52.9731	-4.41942	0.555582	-7.95458	1.79736e-15	5.59174e-13
chr19	29524752	29529752	ENSG00000264515.7	VSTM2B-DT	-	29525752	lncRNA	36.3668	-4.4187	0.637679	-6.92935	4.22774e-12	6.29344e-10
chr16	84290846	84295846	ENSG00000103175.11	WFDC1	+	84294846	protein_coding	58.2911	-4.41589	0.524566	-8.41818	3.82365e-17	1.68814e-14
chr2	131831031	131836031	ENSG00000229203.1	ENSG00000229203	-	131832031	lncRNA	4.9245	-4.41388	1.8646	-2.3672	0.0179235	0.100909
chr17	72338692	72343692	ENSG00000264026.2	LINC02003	+	72342692	lncRNA	75.7986	-4.40323	0.820188	-5.36856	7.93661e-08	4.30484e-06
chrX	52661231	52666231	ENSG00000222608.1	RNA5SP504	+	52665231	rRNA_pseudogene	25.555	-4.4006	0.737382	-5.96786	2.40378e-09	1.87202e-07
chr19	29521994	29526994	ENSG00000187135.8	VSTM2B	+	29525994	protein_coding	76.1961	-4.39617	0.503091	-8.73832	2.36594e-18	1.36597e-15
chr16	81616543	81621543	ENSG00000279681.1	ENSG00000279681	-	81617543	TEC	2.24675	-4.3913	2.14233	-2.04978	0.0403863	NA
chr16	88083026	88088026	ENSG00000260166.4	ENSG00000260166	+	88087026	lncRNA	3.16375	-4.39124	2.0851	-2.10601	0.0352033	NA
chr22	18523157	18528157	ENSG00000277690.2	ENSG00000277690	+	18527157	processed_pseudogene	2.89111	-4.3912	2.04247	-2.14995	0.0315593	NA
chr10	79066895	79071895	ENSG00000224596.9	ZMIZ1-AS1	-	79067895	lncRNA	4.15369	-4.39116	2.00908	-2.18566	0.0288402	0.136589
chrX	120945883	120950883	ENSG00000226600.3	CT47A9	-	120946883	protein_coding	2.50484	-4.39116	2.00714	-2.18777	0.0286867	NA
chrX	41570029	41575029	ENSG00000212207.1	RNU6-1321P	-	41571029	snRNA	3.74197	-4.39104	1.91968	-2.28739	0.0221734	NA
chr17	64499839	64504839	ENSG00000284564.1	MIR3064	-	64500839	miRNA	5.17569	-4.391	1.89234	-2.3204	0.0203192	0.109578
chr14	103331367	103336367	ENSG00000259775.1	EIF5-DT	-	103332367	lncRNA	5.59915	-4.39096	1.87125	-2.34654	0.0189484	0.104639
chr17	64500313	64505313	ENSG00000284368.1	MIR5047	-	64501313	miRNA	5.23972	-4.39096	1.8684	-2.35012	0.0187672	0.103954
chr12	109055986	109060986	ENSG00000212138.1	RNA5SP372	+	109059986	rRNA_pseudogene	5.13384	-4.39094	1.86018	-2.36049	0.0182507	0.102101
chr19	1744056	1749056	ENSG00000267073.1	ENSG00000267073	+	1748056	lncRNA	54.7276	-4.38593	0.566925	-7.73634	1.02317e-14	2.75493e-12
chr8	1369685	1374685	ENSG00000282160.1	ENSG00000282160	+	1373685	lncRNA	90.4299	-4.38216	0.518357	-8.45394	2.81635e-17	1.31089e-14
chr12	113471280	113476280	ENSG00000089116.4	LHX5	-	113472280	protein_coding	186.587	-4.37816	0.381046	-11.4898	1.48386e-30	8.90969e-26
chr11	132859077	132864077	ENSG00000255371.1	OPCML-IT2	-	132860077	lncRNA	44.3556	-4.36558	0.60424	-7.22491	5.01424e-13	9.12349e-11
chrX	48897143	48902143	ENSG00000126768.13	TIMM17B	-	48898143	protein_coding	3.30419	-4.36322	1.98238	-2.20101	0.0277356	NA
chr19	55227784	55232784	ENSG00000180089.6	TMEM86B	-	55228784	protein_coding	3.84009	-4.36256	2.00104	-2.18015	0.0292464	NA
chr6	32748979	32753979	ENSG00000263649.1	MIR3135B	-	32749979	miRNA	27.3875	-4.36133	0.75447	-5.78066	7.44089e-09	5.15318e-07
chr16	87291438	87296438	ENSG00000261697.5	ENSG00000261697	-	87292438	lncRNA	2.77985	-4.35547	2.29002	-1.90193	0.0571801	NA
chr9	133656313	133661313	ENSG00000225756.1	DBH-AS1	-	133657313	lncRNA	76.7152	-4.34864	0.442666	-9.82374	8.89826e-23	1.90817e-19
chr11	44309139	44314139	ENSG00000052850.8	ALX4	-	44310139	protein_coding	92.5471	-4.34353	0.454777	-9.55089	1.28587e-21	1.79555e-18
chr10	131310721	131315721	ENSG00000176769.9	TCERG1L	-	131311721	protein_coding	45.0814	-4.32038	0.587003	-7.36007	1.83812e-13	3.64251e-11
chr11	123184802	123189802	ENSG00000254710.2	ENSG00000254710	+	123188802	lncRNA	63.746	-4.31515	0.530663	-8.13162	4.23601e-16	1.44515e-13
chr11	69637156	69642156	ENSG00000110092.4	CCND1	+	69641156	protein_coding	36.5869	-4.30752	0.678229	-6.35113	2.13739e-10	2.17521e-08
chr20	63006035	63011035	ENSG00000125533.6	BHLHE23	-	63007035	protein_coding	30.0817	-4.30201	0.696557	-6.1761	6.57023e-10	5.86186e-08
chr17	72117020	72122020	ENSG00000125398.8	SOX9	+	72121020	protein_coding	58.7394	-4.29586	0.560155	-7.66906	1.73256e-14	4.3541e-12
chr20	18058188	18063188	ENSG00000125850.11	OVOL2	-	18059188	protein_coding	81.9972	-4.29281	0.467726	-9.17804	4.39029e-20	3.76586e-17
chrX	120936158	120941158	ENSG00000226929.3	CT47A11	-	120937158	protein_coding	3.55343	-4.27775	1.91705	-2.23142	0.025653	NA
chr9	77015655	77020655	ENSG00000204612.1	FOXB2	+	77019655	protein_coding	95.5517	-4.27039	0.464318	-9.19713	3.67653e-20	3.29483e-17
chr11	2136501	2141501	ENSG00000099869.8	IGF2-AS	+	2140501	lncRNA	56.4633	-4.26701	0.508875	-8.38517	5.06514e-17	2.11202e-14
chrX	123180153	123185153	ENSG00000125675.20	GRIA3	+	123184153	protein_coding	38.1475	-4.26529	0.644151	-6.62157	3.55403e-11	4.31107e-09
chrX	151172584	151177584	ENSG00000102195.10	GPR50	+	151176584	protein_coding	78.6667	-4.26439	0.492287	-8.66242	4.61865e-18	2.52111e-15
chr10	133087491	133092491	ENSG00000256925.3	ADGRA1-AS1	-	133088491	lncRNA	112.845	-4.26333	0.465601	-9.15661	5.3552e-20	4.2873e-17
chr18	44678717	44683717	ENSG00000267414.1	SETBP1-DT	-	44679717	lncRNA	50.1878	-4.26091	0.550446	-7.74084	9.87625e-15	2.67122e-12
chr11	64287722	64292722	ENSG00000257069.6	KCNK4-TEX40	+	64291722	lncRNA	34.6299	-4.26049	0.686503	-6.20608	5.43217e-10	4.91219e-08
chr11	128685922	128690922	ENSG00000245008.4	ENSG00000245008	-	128686922	lncRNA	86.2678	-4.2328	0.479845	-8.82119	1.13246e-18	7.23374e-16
chr5	59035761	59040761	ENSG00000247345.2	ENSG00000247345	+	59039761	lncRNA	111.117	-4.23157	0.438937	-9.64049	5.39318e-22	7.89824e-19
chr2	38069447	38074447	ENSG00000232973.14	CYP1B1-AS1	+	38073447	lncRNA	55.8748	-4.22989	0.52173	-8.10743	5.17037e-16	1.7441e-13
chr11	1662343	1667343	ENSG00000231487.1	ENSG00000231487	-	1663343	lncRNA	40.6792	-4.22447	0.667711	-6.3268	2.50301e-10	2.49238e-08
chr16	86930510	86935510	ENSG00000289423.1	ENSG00000289423	-	86931510	lncRNA	43.2088	-4.21531	0.582663	-7.23455	4.67069e-13	8.55021e-11
chrX	17371200	17376200	ENSG00000188158.17	NHS	+	17375200	protein_coding	48.9076	-4.20825	0.520011	-8.09263	5.83913e-16	1.93704e-13
chr21	41357999	41362999	ENSG00000183486.14	MX2	+	41361999	protein_coding	59.4011	-4.20823	0.561107	-7.49987	6.38809e-14	1.39988e-11
chr20	62474995	62479995	ENSG00000130700.7	GATA5	-	62475995	protein_coding	101.265	-4.20377	0.456919	-9.20025	3.57106e-20	3.29483e-17
chr16	1095244	1100244	ENSG00000184471.9	C1QTNF8	-	1096244	protein_coding	18.5076	-4.19912	0.900842	-4.66132	3.14184e-06	0.000106762
chr17	13600929	13605929	ENSG00000153976.3	HS3ST3A1	-	13601929	protein_coding	57.6608	-4.19563	0.567481	-7.39342	1.431e-13	2.90281e-11
chr20	64045836	64050836	ENSG00000171703.17	TCEA2	+	64049836	protein_coding	11.34	-4.19405	0.999067	-4.19797	2.69319e-05	0.00067974
chr22	43407196	43412196	ENSG00000186732.14	MPPED1	+	43411196	protein_coding	77.8254	-4.19352	0.482483	-8.69153	3.57589e-18	2.00664e-15
chr1	165355715	165360715	ENSG00000162761.14	LMX1A	-	165356715	protein_coding	68.8357	-4.18523	0.514115	-8.14064	3.93206e-16	1.35688e-13
chr22	29718859	29723859	ENSG00000232396.2	CABP7-DT	-	29719859	lncRNA	43.2352	-4.18439	0.573602	-7.29493	2.98808e-13	5.67774e-11
chr11	416455	421455	ENSG00000185187.13	SIGIRR	-	417455	protein_coding	36.4865	-4.18388	0.666393	-6.27839	3.4209e-10	3.27599e-08
chrX	120970208	120975208	ENSG00000230594.3	CT47A4	-	120971208	protein_coding	5.8747	-4.18078	1.34738	-3.1029	0.00191635	0.0219408
chrX	74924472	74929472	ENSG00000050030.16	NEXMIF	-	74925472	protein_coding	8.38311	-4.15913	1.30413	-3.18921	0.00142665	0.0175896
chr7	142797041	142802041	ENSG00000211772.11	TRBC2	+	142801041	TR_C_gene	148.72	-4.15413	0.42442	-9.78779	1.27045e-22	2.54277e-19
chr20	46890624	46895624	ENSG00000064655.19	EYA2	+	46894624	protein_coding	56.3155	-4.14488	0.527516	-7.85735	3.92358e-15	1.15484e-12
chrX	52703602	52708602	ENSG00000223958.1	ENSG00000223958	+	52707602	processed_pseudogene	35.3517	-4.14115	0.646258	-6.40789	1.4755e-10	1.54346e-08
chr22	48332199	48337199	ENSG00000288540.1	ENSG00000288540	-	48333199	lncRNA	72.6114	-4.13566	0.533779	-7.7479	9.34259e-15	2.54985e-12
chr6	387739	392739	ENSG00000137265.16	IRF4	+	391739	protein_coding	99.6583	-4.13321	0.433707	-9.52996	1.57349e-21	2.14724e-18
chr10	15718922	15723922	ENSG00000077943.8	ITGA8	-	15719922	protein_coding	119.454	-4.13186	0.428446	-9.64383	5.22025e-22	7.89824e-19
chr1	20548573	20553573	ENSG00000183114.8	FAM43B	+	20552573	protein_coding	79.0588	-4.13167	0.508351	-8.1276	4.37874e-16	1.48541e-13
chr16	1061240	1066240	ENSG00000261720.1	ENSG00000261720	+	1065240	lncRNA	102.939	-4.1275	0.398351	-10.3615	3.71226e-25	1.71461e-21
chr6	133891802	133896802	ENSG00000227954.7	TARID	-	133892802	lncRNA	102.534	-4.12173	0.423934	-9.72256	2.41635e-22	4.26727e-19
chr18	6936020	6941020	ENSG00000251897.1	RNU6-916P	-	6937020	snRNA	41.5247	-4.12049	0.674708	-6.10706	1.01482e-09	8.63088e-08
chrX	23347013	23352013	ENSG00000226774.1	HIKESHIP1	+	23351013	processed_pseudogene	29.1824	-4.11617	0.80218	-5.13123	2.87857e-07	1.33985e-05
chrX	71717285	71722285	ENSG00000215115.7	CXorf49	-	71718285	protein_coding	41.8556	-4.11594	0.610528	-6.74161	1.56636e-11	2.08076e-09
chr17	79602921	79607921	ENSG00000263278.2	ENSG00000263278	-	79603921	lncRNA	119.586	-4.11462	0.381218	-10.7934	3.70004e-27	5.55413e-23
chr20	54172986	54177986	ENSG00000019186.10	CYP24A1	-	54173986	protein_coding	95.0949	-4.11323	0.510163	-8.06257	7.47081e-16	2.42474e-13
chr6	1323022	1328022	ENSG00000281809.1	LINC01394	-	1324022	lncRNA	95.6528	-4.10975	0.453611	-9.06009	1.30348e-19	9.54469e-17
chr11	2133209	2138209	ENSG00000207805.3	MIR483	-	2134209	miRNA	34.1181	-4.10333	0.679401	-6.03963	1.54467e-09	1.26705e-07
chr2	131363168	131368168	ENSG00000233087.8	RAB6D	-	131364168	protein_coding	44.1713	-4.10128	0.587688	-6.97867	2.97986e-12	4.59956e-10
chr8	2622382	2627382	ENSG00000277526.5	LINC03021	-	2623382	lncRNA	54.0383	-4.09745	0.582444	-7.03492	1.99372e-12	3.2094e-10
chr21	42217173	42222173	ENSG00000223262.1	RNA5SP492	+	42221173	rRNA_pseudogene	52.8575	-4.09702	0.515783	-7.94329	1.96881e-15	6.07544e-13
chr15	45113172	45118172	ENSG00000140279.13	DUOX2	-	45114172	protein_coding	91.9248	-4.0883	0.467451	-8.74595	2.21154e-18	1.30186e-15
chr15	26967181	26972181	ENSG00000182256.13	GABRG3	+	26971181	protein_coding	33.6693	-4.08108	0.659124	-6.19167	5.95312e-10	5.34304e-08
chr20	21702585	21707585	ENSG00000280350.1	LINC01726	-	21703585	lncRNA	89.5544	-4.07969	0.533648	-7.64491	2.09099e-14	5.12455e-12
chr2	102615553	102620553	ENSG00000115616.3	SLC9A2	+	102619553	protein_coding	95.9864	-4.07949	0.47712	-8.55023	1.22849e-17	6.04616e-15
chr10	26434341	26439341	ENSG00000077420.16	APBB1IP	+	26438341	protein_coding	80.648	-4.07778	0.489833	-8.32483	8.4452e-17	3.33608e-14
chr15	95322528	95327528	ENSG00000259134.7	LINC00924	+	95326528	lncRNA	43.2804	-4.07111	0.63334	-6.428	1.29291e-10	1.36676e-08
chr20	21701659	21706659	ENSG00000125813.15	PAX1	+	21705659	protein_coding	76.8239	-4.06986	0.556983	-7.30696	2.73244e-13	5.24175e-11
chr20	63418269	63423269	ENSG00000280936.1	ENSG00000280936	+	63422269	lncRNA	77.0396	-4.06819	0.519536	-7.83044	4.86171e-15	1.41023e-12
chr8	737106	742106	ENSG00000104714.14	ERICH1	-	738106	protein_coding	54.1621	-4.06651	0.530251	-7.66902	1.73311e-14	4.3541e-12
chr1	228002998	228007998	ENSG00000154342.6	WNT3A	+	228006998	protein_coding	50.2151	-4.06451	0.628295	-6.46912	9.85784e-11	1.07894e-08
chrX	13565601	13570601	ENSG00000198759.12	EGFL6	+	13569601	protein_coding	56.176	-4.06167	0.511812	-7.93586	2.09038e-15	6.40382e-13
chr16	556394	561394	ENSG00000161992.6	PRR35	+	560394	protein_coding	61.511	-4.06116	0.524151	-7.74808	9.32948e-15	2.54985e-12
chr13	113860112	113865112	ENSG00000272695.2	GAS6-DT	+	113864112	lncRNA	11.4652	-4.05651	1.06074	-3.82421	0.000131192	0.0025912
chr7	142797177	142802177	ENSG00000290099.1	ENSG00000290099	-	142798177	lncRNA	147.105	-4.05043	0.426567	-9.49541	2.19336e-21	2.80209e-18
chr8	2511580	2516580	ENSG00000253444.1	ENSG00000253444	-	2512580	lncRNA	57.4398	-4.04249	0.602453	-6.71005	1.94556e-11	2.5231e-09
chr1	2967707	2972707	ENSG00000284745.1	ENSG00000284745	-	2968707	lncRNA	78.1874	-4.03876	0.480638	-8.40292	4.35502e-17	1.85456e-14
chr10	124092598	124097598	ENSG00000182022.18	CHST15	-	124093598	protein_coding	70.1605	-4.03736	0.499262	-8.08666	6.13227e-16	2.02311e-13
chr20	63249978	63254978	ENSG00000275620.1	FLJ16779	+	63253978	lncRNA	78.5083	-4.01902	0.522253	-7.69554	1.40896e-14	3.64653e-12
chr17	14296600	14301600	ENSG00000262786.1	ENSG00000262786	-	14297600	lncRNA	91.7972	-4.01564	0.445313	-9.01756	1.92328e-19	1.35861e-16
chr8	142172339	142177339	ENSG00000265247.1	MIR4472-1	+	142176339	miRNA	62.8101	-4.01536	0.536764	-7.48069	7.39315e-14	1.59681e-11
chr1	1348418	1353418	ENSG00000107404.21	DVL1	-	1349418	protein_coding	5.46964	-4.01242	1.43457	-2.79695	0.0051588	0.0445179
chr12	131296972	131301972	ENSG00000248703.2	LINC02415	-	131297972	lncRNA	19.4353	-4.00781	0.89393	-4.48336	7.34764e-06	0.000223383
chr1	107960443	107965443	ENSG00000230489.1	VAV3-AS1	+	107964443	lncRNA	101.074	-4.00719	0.414446	-9.66878	4.0922e-22	6.4661e-19
chr20	63005383	63010383	ENSG00000272259.5	LINC01749	+	63009383	lncRNA	27.7532	-4.00235	0.672622	-5.95037	2.67535e-09	2.06476e-07
chr12	132340477	132345477	ENSG00000286008.1	ENSG00000286008	+	132344477	lncRNA	108.189	-3.99837	0.449311	-8.89891	5.63975e-19	3.72124e-16
chr5	176198295	176203295	ENSG00000283235.2	ENSG00000283235	-	176199295	lncRNA	67.8372	-3.98109	0.510786	-7.79406	6.48894e-15	1.82921e-12
chr11	128695023	128700023	ENSG00000254703.4	SENCR	-	128696023	lncRNA	116.209	-3.97743	0.442588	-8.98675	2.54649e-19	1.73751e-16
chr18	905667	910667	ENSG00000265179.9	ENSG00000265179	-	906667	lncRNA	121.603	-3.97692	0.404132	-9.84066	7.52157e-23	1.69615e-19
chr13	107866383	107871383	ENSG00000274718.1	ENSG00000274718	+	107870383	lncRNA	69.444	-3.9737	0.575459	-6.90526	5.01108e-12	7.33866e-10
chr6	72617792	72622792	ENSG00000185760.18	KCNQ5	+	72621792	protein_coding	69.3929	-3.97236	0.487397	-8.15014	3.63494e-16	1.26879e-13
chr1	1320756	1325756	ENSG00000224051.7	CPTP	+	1324756	protein_coding	3.00448	-3.96754	2.05396	-1.93166	0.0534021	NA
chr11	89899449	89904449	ENSG00000254785.1	ENSG00000254785	-	89900449	unprocessed_pseudogene	62.1607	-3.95654	0.520409	-7.60275	2.89906e-14	6.88028e-12
chr12	132706819	132711819	ENSG00000247077.7	PGAM5	+	132710819	protein_coding	4.95949	-3.95563	1.93142	-2.04805	0.0405555	0.168578
chrX	382980	387980	ENSG00000281849.3	ENSG00000281849	+	386980	lncRNA	6.11695	-3.95541	1.7035	-2.32192	0.0202371	0.109323
chr22	48488324	48493324	ENSG00000287225.1	ENSG00000287225	-	48489324	lncRNA	75.4085	-3.94809	0.447727	-8.81809	1.16433e-18	7.35904e-16
chr20	54174414	54179414	ENSG00000286587.1	ENSG00000286587	+	54178414	lncRNA	77.5432	-3.94753	0.466254	-8.46647	2.52945e-17	1.19589e-14
chr11	89940035	89945035	ENSG00000254818.1	ENSG00000254818	+	89944035	unprocessed_pseudogene	90.399	-3.94266	0.481022	-8.19642	2.47651e-16	9.01209e-14
chr15	45110326	45115326	ENSG00000140274.14	DUOXA2	+	45114326	protein_coding	120.134	-3.94056	0.391866	-10.0559	8.65432e-24	2.73495e-20
chr13	103443968	103448968	ENSG00000230474.1	ATP6V1G1P7	-	103444968	processed_pseudogene	26.6907	-3.9404	0.650619	-6.05639	1.3921e-09	1.15134e-07
chr16	1206124	1211124	ENSG00000261294.1	ENSG00000261294	-	1207124	lncRNA	45.7186	-3.93977	0.550772	-7.15318	8.479e-13	1.48864e-10
chr4	575295	580295	ENSG00000273238.3	TMEM271	-	576295	protein_coding	97.722	-3.9347	0.453667	-8.6731	4.20501e-18	2.31638e-15
chrX	108732011	108737011	ENSG00000237863.3	IRS4-AS1	+	108736011	lncRNA	74.4408	-3.92618	0.40396	-9.71923	2.49653e-22	4.28291e-19
chrX	120977529	120982529	ENSG00000270456.1	ENSG00000270456	+	120981529	processed_pseudogene	5.25203	-3.91478	1.38644	-2.82362	0.00474839	0.0419839
chr18	74456944	74461944	ENSG00000187773.9	DIPK1C	-	74457944	protein_coding	83.3098	-3.90812	0.444788	-8.78648	1.54318e-18	9.455e-16
chr18	6414237	6419237	ENSG00000154655.16	L3MBTL4	-	6415237	protein_coding	41.8433	-3.90186	0.555413	-7.02515	2.13839e-12	3.43309e-10
chr11	71251577	71256577	ENSG00000162105.21	SHANK2	-	71252577	protein_coding	93.3432	-3.89993	0.410705	-9.4957	2.18738e-21	2.80209e-18
chr11	70871368	70876368	ENSG00000263744.1	MIR3664	-	70872368	miRNA	51.7371	-3.89291	0.547535	-7.10988	1.16141e-12	1.95368e-10
chr16	88230785	88235785	ENSG00000261273.1	ENSG00000261273	+	88234785	lncRNA	55.1109	-3.89291	0.524947	-7.41581	1.20886e-13	2.49432e-11
chr11	1661597	1666597	ENSG00000205866.4	FAM99A	+	1665597	lncRNA	45.2249	-3.89001	0.592186	-6.5689	5.06888e-11	5.99126e-09
chr7	375359	380359	ENSG00000249574.1	ENSG00000249574	+	379359	lncRNA	29.3616	-3.88264	0.677103	-5.73419	9.79795e-09	6.57327e-07
chr13	107866496	107871496	ENSG00000204442.4	NALF1	-	107867496	protein_coding	68.6206	-3.87728	0.565867	-6.85192	7.28642e-12	1.04168e-09
chr5	129900465	129905465	ENSG00000198108.4	CHSY3	+	129904465	protein_coding	54.908	-3.8729	0.510647	-7.58431	3.34267e-14	7.77934e-12
chr13	110128136	110133136	ENSG00000275830.4	ENSG00000275830	-	110129136	lncRNA	94.5717	-3.8713	0.432963	-8.9414	3.84254e-19	2.59237e-16
chr8	1621417	1626417	ENSG00000253267.5	DLGAP2-AS1	-	1622417	lncRNA	67.6391	-3.86923	0.50044	-7.73165	1.06161e-14	2.84567e-12
chrX	91775261	91780261	ENSG00000102290.23	PCDH11X	+	91779261	protein_coding	13.5183	-3.86815	0.888841	-4.3519	1.34963e-05	0.000376917
chr11	101128813	101133813	ENSG00000082175.16	PGR	-	101129813	protein_coding	98.7366	-3.86647	0.471393	-8.20222	2.35979e-16	8.63969e-14
chr15	98646389	98651389	ENSG00000259424.3	IRAIN	-	98647389	lncRNA	21.5411	-3.86213	0.702048	-5.50123	3.77155e-08	2.19437e-06
chr1	1169880	1174880	ENSG00000162571.14	TTLL10	+	1173880	protein_coding	118.122	-3.84971	0.458494	-8.39641	4.60333e-17	1.93288e-14
chr21	44929112	44934112	ENSG00000273027.1	ENSG00000273027	-	44930112	lncRNA	86.412	-3.83418	0.455824	-8.41154	4.04654e-17	1.77281e-14
chr20	62546447	62551447	ENSG00000174407.15	MIR1-1HG	+	62550447	lncRNA	41.2293	-3.83339	0.526292	-7.28376	3.24632e-13	6.07233e-11
chrX	153075968	153080968	ENSG00000268883.2	PNMA6B	-	153076968	unprocessed_pseudogene	11.2768	-3.82706	0.953645	-4.01309	5.99296e-05	0.00135126
chrX	6227867	6232867	ENSG00000146938.16	NLGN4X	-	6228867	protein_coding	75.4259	-3.82437	0.920133	-4.15632	3.23412e-05	0.000797822
chr20	4248287	4253287	ENSG00000171873.8	ADRA1D	-	4249287	protein_coding	57.7889	-3.82324	0.499455	-7.65482	1.93578e-14	4.80297e-12
chr19	48390551	48395551	ENSG00000105438.9	KDELR1	-	48391551	protein_coding	20.3928	-3.8205	0.722479	-5.28804	1.23631e-07	6.2856e-06
chr14	105890719	105895719	ENSG00000211914.1	IGHD6-19	-	105891719	IG_D_gene	47.6852	-3.81945	0.559109	-6.83132	8.41361e-12	1.17485e-09
chr8	141577658	141582658	ENSG00000287677.2	ENSG00000287677	+	141581658	lncRNA	152.693	-3.81406	0.412569	-9.24467	2.35971e-20	2.36144e-17
chr20	62515096	62520096	ENSG00000260542.1	ENSG00000260542	-	62516096	lncRNA	48.2912	-3.81121	0.562056	-6.78084	1.19481e-11	1.61944e-09
chr11	89753953	89758953	ENSG00000254971.1	ENSG00000254971	-	89754953	lncRNA	37.4147	-3.80791	0.581657	-6.54665	5.88419e-11	6.8471e-09
chr10	2932021	2937021	ENSG00000231743.1	ENSG00000231743	+	2936021	processed_pseudogene	92.2675	-3.80755	0.451962	-8.42448	3.62353e-17	1.61164e-14
chr17	34610409	34615409	ENSG00000278860.1	ENSG00000278860	+	34614409	TEC	29.9355	-3.80588	0.610345	-6.23561	4.50007e-10	4.15696e-08
chr11	130427609	130432609	ENSG00000134917.10	ADAMTS8	-	130428609	protein_coding	83.683	-3.80449	0.451279	-8.43046	3.44298e-17	1.55436e-14
chr5	1883332	1888332	ENSG00000249326.1	CTD-2194D22.4	+	1887332	lncRNA	80.4388	-3.80396	0.406063	-9.3679	7.39924e-21	8.54384e-18
chr5	7392138	7397138	ENSG00000078295.17	ADCY2	+	7396138	protein_coding	65.9939	-3.79807	0.487919	-7.78422	7.01428e-15	1.94984e-12
chr20	53178550	53183550	ENSG00000223492.1	ENSG00000223492	-	53179550	lncRNA	77.025	-3.79585	0.486872	-7.7964	6.36972e-15	1.81262e-12
chr15	88255791	88260791	ENSG00000140538.17	NTRK3	-	88256791	protein_coding	130.779	-3.7867	0.351845	-10.7624	5.17914e-27	6.21953e-23
chr15	96404189	96409189	ENSG00000259542.5	ENSG00000259542	-	96405189	lncRNA	47.7385	-3.78447	0.927229	-4.08149	4.47485e-05	0.00105647
chr20	61718748	61723748	ENSG00000179253.3	ENSG00000179253	-	61719748	lncRNA	72.4971	-3.78292	0.452405	-8.36179	6.17728e-17	2.50614e-14
chr8	144329957	144334957	ENSG00000185803.12	SLC52A2	+	144333957	protein_coding	27.4431	-3.77897	0.665481	-5.67856	1.35837e-08	8.82703e-07
chr2	131359364	131364364	ENSG00000283303.1	ENSG00000283303	+	131363364	lncRNA	47.6022	-3.77685	0.526763	-7.16991	7.50449e-13	1.33709e-10
chr5	17680584	17685584	ENSG00000249937.9	LINC02223	+	17684584	lncRNA	38.1865	-3.77363	0.586403	-6.43522	1.23295e-10	1.31029e-08
chr2	2846049	2851049	ENSG00000288786.1	ENSG00000288786	-	2847049	lncRNA	52.8456	-3.76512	0.522041	-7.21231	5.50121e-13	9.97929e-11
chr12	130647342	130652342	ENSG00000256343.8	ENSG00000256343	+	130651342	lncRNA	66.7422	-3.76437	0.488188	-7.71091	1.24924e-14	3.30438e-12
chr14	105636168	105641168	ENSG00000277030.1	MIR8071-2	+	105640168	miRNA	25.0618	-3.76019	0.761029	-4.94092	7.77536e-07	3.17594e-05
chr15	95326129	95331129	ENSG00000248441.9	LETR1	-	95327129	lncRNA	38.0614	-3.76016	1.00159	-3.75418	0.000173908	0.0032899
chrX	73078512	73083512	ENSG00000186288.5	PABPC1L2A	-	73079512	protein_coding	27.4746	-3.75884	0.687728	-5.4656	4.61346e-08	2.63068e-06
chr8	2722956	2727956	ENSG00000253853.3	ENSG00000253853	+	2726956	lncRNA	56.9852	-3.75558	0.540349	-6.95029	3.64528e-12	5.54119e-10
chr7	1228872	1233872	ENSG00000164853.9	UNCX	+	1232872	protein_coding	27.4766	-3.75299	0.743484	-5.04784	4.46822e-07	1.96982e-05
chr16	84364527	84369527	ENSG00000064270.13	ATP2C2	+	84368527	protein_coding	32.7353	-3.75193	0.597252	-6.28199	3.34259e-10	3.20611e-08
chr8	26044413	26049413	ENSG00000221818.9	EBF2	-	26045413	protein_coding	37.8365	-3.74708	0.529805	-7.07257	1.52089e-12	2.50192e-10
chr9	110578880	110583880	ENSG00000165124.19	SVEP1	-	110579880	protein_coding	103.549	-3.74177	0.469799	-7.96462	1.65734e-15	5.21012e-13
chr10	3257897	3262897	ENSG00000226762.5	LINC02668	-	3258897	lncRNA	83.8342	-3.73875	0.434172	-8.61123	7.22823e-18	3.66152e-15
chr4	9363874	9368874	ENSG00000205946.1	USP17L6P	+	9367874	unprocessed_pseudogene	417.334	-3.73691	0.337757	-11.0639	1.87757e-28	5.63684e-24
chrX	22171983	22176983	ENSG00000224204.1	PHEX-AS1	-	22172983	lncRNA	18.6814	-3.73684	0.764508	-4.88791	1.01915e-06	4.06062e-05
chr11	1070875	1075875	ENSG00000198788.9	MUC2	+	1074875	protein_coding	48.1436	-3.7358	0.537275	-6.95324	3.5699e-12	5.44039e-10
chr1	154498219	154503219	ENSG00000163239.12	TDRD10	+	154502219	protein_coding	116.643	-3.73377	0.408464	-9.141	6.18751e-20	4.82497e-17
chr8	7719091	7724091	ENSG00000285913.1	FAM90A18	+	7723091	protein_coding	41.7499	-3.73151	0.544758	-6.84986	7.39223e-12	1.05311e-09
chr15	98644539	98649539	ENSG00000140443.15	IGF1R	+	98648539	protein_coding	25.3463	-3.72855	0.607695	-6.13556	8.48616e-10	7.36334e-08
chr8	892112	897112	ENSG00000282759.1	ENSG00000282759	-	893112	lncRNA	59.6053	-3.72637	0.505543	-7.37102	1.69326e-13	3.40034e-11
chrX	151226715	151231715	ENSG00000228717.1	NAB1P1	-	151227715	processed_pseudogene	67.6879	-3.72635	0.478094	-7.79419	6.48223e-15	1.82921e-12
chr2	94857362	94862362	ENSG00000278631.1	SOWAHCP5	+	94861362	processed_pseudogene	47.1849	-3.72498	0.554746	-6.71474	1.88397e-11	2.4485e-09
chr12	14960728	14965728	ENSG00000111348.9	ARHGDIB	-	14961728	protein_coding	89.0899	-3.72377	0.46881	-7.94303	1.97307e-15	6.07544e-13
chr9	135348673	135353673	ENSG00000235572.3	ENSG00000235572	+	135352673	lncRNA	55.6252	-3.722	0.494955	-7.51987	5.48311e-14	1.21486e-11
chr9	134501472	134506472	ENSG00000223795.2	ENSG00000223795	+	134505472	lncRNA	55.7498	-3.71983	0.483769	-7.68928	1.4797e-14	3.81318e-12
chr13	87802808	87807808	ENSG00000223404.3	LINC00397	-	87803808	lncRNA	33.0029	-3.71838	0.630435	-5.89812	3.6766e-09	2.74692e-07
chr22	43891013	43896013	ENSG00000100341.13	PNPLA5	-	43892013	protein_coding	56.6542	-3.71595	0.483307	-7.6886	1.48759e-14	3.81714e-12
chr20	25081141	25086141	ENSG00000100987.15	VSX1	-	25082141	protein_coding	113.793	-3.71352	0.430901	-8.61805	6.81017e-18	3.49496e-15
chr6	50709526	50714526	ENSG00000008197.5	TFAP2D	+	50713526	protein_coding	55.3255	-3.71245	0.498008	-7.45459	9.01449e-14	1.91938e-11
chr20	46307498	46312498	ENSG00000149654.11	CDH22	-	46308498	protein_coding	95.9101	-3.7114	0.408229	-9.09145	9.77303e-20	7.33515e-17
chr16	1077731	1082731	ENSG00000261713.7	SSTR5-AS1	-	1078731	lncRNA	94.9941	-3.71067	0.431193	-8.6056	7.59218e-18	3.79887e-15
chrX	143635101	143640101	ENSG00000179542.16	SLITRK4	-	143636101	protein_coding	11.221	-3.71029	0.883481	-4.19963	2.67357e-05	0.000675924
chr4	46386255	46391255	ENSG00000249330.3	ENSG00000249330	+	46390255	lncRNA	52.0144	-3.70998	0.55116	-6.73122	1.68246e-11	2.21538e-09
chr19	50309539	50314539	ENSG00000267815.1	ENSG00000267815	-	50310539	lncRNA	85.073	-3.70974	0.434842	-8.53123	1.44804e-17	6.90051e-15
chr16	7303662	7308662	ENSG00000287340.2	ENSG00000287340	-	7304662	lncRNA	53.4787	-3.70483	0.524597	-7.06224	1.63837e-12	2.68049e-10
chr9	134523182	134528182	ENSG00000228877.2	ENSG00000228877	+	134527182	lncRNA	51.0798	-3.69849	0.562713	-6.5726	4.94437e-11	5.85561e-09
chr6	75205267	75210267	ENSG00000111799.22	COL12A1	-	75206267	protein_coding	72.7225	-3.69569	0.443693	-8.32938	8.12673e-17	3.23153e-14
chr11	89752975	89757975	ENSG00000234376.4	UBTFL2	-	89753975	processed_pseudogene	44.4952	-3.68976	0.594244	-6.20917	5.32665e-10	4.82403e-08
chr2	94856282	94861282	ENSG00000229089.8	ANKRD20A8P	-	94857282	transcribed_unprocessed_pseudogene	50.2007	-3.68945	0.564244	-6.53874	6.20385e-11	7.17734e-09
chr7	4133837	4138837	ENSG00000283991.1	ENSG00000283991	-	4134837	lncRNA	14.6898	-3.68819	0.908874	-4.05798	4.94992e-05	0.00115154
chrX	104253933	104258933	ENSG00000123576.5	ESX1	-	104254933	protein_coding	37.4083	-3.68714	0.525801	-7.01242	2.34233e-12	3.72071e-10
chrX	52579989	52584989	ENSG00000228771.1	ENSG00000228771	+	52583989	unprocessed_pseudogene	20.3911	-3.68457	0.793707	-4.64223	3.44668e-06	0.000116177
chr1	34162883	34167883	ENSG00000142698.15	C1orf94	+	34166883	protein_coding	80.4494	-3.68317	0.482256	-7.63738	2.21694e-14	5.38922e-12
chr4	9344893	9349893	ENSG00000231051.3	USP17L28	+	9348893	protein_coding	336.14	-3.68313	0.350319	-10.5137	7.47383e-26	4.98621e-22
chr8	143076630	143081630	ENSG00000261667.2	LY6L	+	143080630	protein_coding	79.8085	-3.68092	0.459542	-8.00998	1.14723e-15	3.66404e-13
chr10	3423563	3428563	ENSG00000289882.1	ENSG00000289882	-	3424563	lncRNA	83.4555	-3.68037	0.442657	-8.31427	9.23163e-17	3.59938e-14
chr8	4993972	4998972	ENSG00000183117.20	CSMD1	-	4994972	protein_coding	49.1052	-3.67925	0.571524	-6.4376	1.21374e-10	1.29445e-08
chr18	906680	911680	ENSG00000265671.1	ENSG00000265671	-	907680	lncRNA	123.695	-3.67482	0.39694	-9.25788	2.08531e-20	2.12221e-17
chr8	9902472	9907472	ENSG00000284321.1	MIR124-1	-	9903472	miRNA	87.2574	-3.67063	0.419396	-8.75218	2.09279e-18	1.25659e-15
chr11	89772981	89777981	ENSG00000254751.3	TRIM64DP	+	89776981	transcribed_unprocessed_pseudogene	33.4346	-3.66878	0.642895	-5.70666	1.15216e-08	7.61061e-07
chr11	13008159	13013159	ENSG00000254670.1	RASSF10-DT	-	13009159	lncRNA	92.3027	-3.66326	0.437575	-8.37174	5.67748e-17	2.31904e-14
chrX	4632572	4637572	ENSG00000236513.1	ENSG00000236513	-	4633572	lncRNA	33.4181	-3.66304	0.677121	-5.40974	6.31176e-08	3.51236e-06
chr14	104113405	104118405	ENSG00000207568.1	MIR203A	+	104117405	miRNA	98.9977	-3.66283	0.440227	-8.3203	8.77377e-17	3.44322e-14
chr1	20182096	20187096	ENSG00000162543.6	UBXN10	+	20186096	protein_coding	65.2097	-3.66225	0.484206	-7.56342	3.92612e-14	8.9977e-12
chr21	44698221	44703221	ENSG00000236382.1	KRTAP10-13P	+	44702221	unprocessed_pseudogene	92.47	-3.66175	0.453852	-8.06817	7.13572e-16	2.32857e-13
chr4	9330658	9335658	ENSG00000229579.5	USP17L26	+	9334658	protein_coding	352.521	-3.65982	0.337485	-10.8444	2.12059e-27	4.24429e-23
chr8	2514998	2519998	ENSG00000253855.1	ENSG00000253855	+	2518998	lncRNA	56.0483	-3.65767	0.494398	-7.39823	1.38012e-13	2.80907e-11
chr7	1693357	1698357	ENSG00000205971.3	ENSG00000205971	-	1694357	lncRNA	48.9887	-3.65365	0.534779	-6.83208	8.3692e-12	1.17138e-09
chr2	213147972	213152972	ENSG00000270659.2	ENSG00000270659	+	213151972	lncRNA	47.4967	-3.64694	0.587832	-6.20405	5.50288e-10	4.96119e-08
chr11	64287302	64292302	ENSG00000182450.14	KCNK4	+	64291302	protein_coding	26.1448	-3.63758	0.684278	-5.31593	1.06112e-07	5.52116e-06
chr9	111329224	111334224	ENSG00000171133.4	OR2K2	-	111330224	protein_coding	91.1827	-3.63724	0.442291	-8.22364	1.97417e-16	7.40857e-14
chr8	1373867	1378867	ENSG00000281961.1	ENSG00000281961	+	1377867	lncRNA	30.6819	-3.63677	0.718565	-5.06115	4.16727e-07	1.848e-05
chrX	51706512	51711512	ENSG00000223591.5	CENPVL1	+	51710512	protein_coding	42.2825	-3.63228	0.572601	-6.34346	2.24655e-10	2.26893e-08
chr5	76083186	76088186	ENSG00000248127.1	SV2C-AS1	-	76084186	lncRNA	73.6093	-3.62838	0.523208	-6.93486	4.06622e-12	6.08859e-10
chrX	71715142	71720142	ENSG00000226870.2	ENSG00000226870	+	71719142	transcribed_unprocessed_pseudogene	38.3431	-3.62788	0.592818	-6.11971	9.37464e-10	8.00698e-08
chr11	2128964	2133964	ENSG00000240801.1	ENSG00000240801	-	2129964	lncRNA	36.9745	-3.62296	0.636754	-5.68973	1.27239e-08	8.34053e-07
chr14	105908923	105913923	ENSG00000237197.1	IGHD1-7	-	105909923	IG_D_gene	47.9544	-3.62142	0.564309	-6.41744	1.38581e-10	1.45472e-08
chr22	48546387	48551387	ENSG00000281732.1	ENSG00000281732	-	48547387	lncRNA	77.6838	-3.62126	0.45782	-7.90979	2.57831e-15	7.7406e-13
chr8	4629065	4634065	ENSG00000285977.1	ENSG00000285977	+	4633065	lncRNA	32.7693	-3.61951	0.693329	-5.22048	1.78459e-07	8.71169e-06
chr7	150046854	150051854	ENSG00000276538.1	ENSG00000276538	-	150047854	unprocessed_pseudogene	42.5983	-3.61198	0.48758	-7.40799	1.28227e-13	2.62774e-11
chr11	64292037	64297037	ENSG00000207024.1	Y_RNA	+	64296037	misc_RNA	101.636	-3.61061	0.409979	-8.80682	1.28747e-18	7.96955e-16
chr7	142793456	142798456	ENSG00000211771.1	TRBJ2-7	+	142797456	TR_J_gene	162.677	-3.60952	0.671654	-5.37408	7.69754e-08	4.18958e-06
chr14	105880556	105885556	ENSG00000225825.1	IGHD6-25	-	105881556	IG_D_gene	61.0849	-3.59997	0.527784	-6.82092	9.04594e-12	1.25151e-09
chr11	2269588	2274588	ENSG00000183734.5	ASCL2	-	2270588	protein_coding	83.5799	-3.59506	0.438799	-8.19296	2.54888e-16	9.21958e-14
chr14	104219584	104224584	ENSG00000258913.2	LINC02691	+	104223584	lncRNA	30.9255	-3.59479	0.692667	-5.18978	2.10538e-07	1.01052e-05
chr9	109138	114138	ENSG00000227917.3	ENSG00000227917	-	110138	lncRNA	87.6164	-3.59317	0.454208	-7.91085	2.5564e-15	7.7134e-13
chr1	181313690	181318690	ENSG00000198216.14	CACNA1E	+	181317690	protein_coding	143.442	-3.59133	0.393047	-9.13716	6.41151e-20	4.93555e-17
chr9	111283836	111288836	ENSG00000227531.1	ENSG00000227531	-	111284836	lncRNA	85.2643	-3.59113	0.447997	-8.01596	1.09279e-15	3.50886e-13
chr2	2678109	2683109	ENSG00000289608.2	ENSG00000289608	+	2682109	lncRNA	81.3427	-3.59098	0.467573	-7.68003	1.59057e-14	4.06401e-12
chrX	120941023	120946023	ENSG00000224089.3	CT47A10	-	120942023	protein_coding	4.9255	-3.58889	1.50302	-2.38778	0.0169506	0.0974536
chr4	46992581	46997581	ENSG00000109158.11	GABRA4	-	46993581	protein_coding	46.2303	-3.58144	0.588826	-6.08233	1.18451e-09	9.93332e-08
chrX	120938623	120943623	ENSG00000271154.1	ENSG00000271154	+	120942623	processed_pseudogene	5.27064	-3.57964	1.53666	-2.32949	0.0198331	0.107877
chr20	52499591	52504591	ENSG00000232465.1	ENSG00000232465	-	52500591	lncRNA	23.1668	-3.57932	0.710709	-5.03627	4.74689e-07	2.07312e-05
chr11	70071363	70076363	ENSG00000202070.1	RNU6-1175P	+	70075363	snRNA	80.5401	-3.57449	0.473859	-7.54336	4.58027e-14	1.0339e-11
chr13	101415508	101420508	ENSG00000102452.18	NALCN	-	101416508	protein_coding	25.3427	-3.57409	0.757106	-4.72073	2.35004e-06	8.31993e-05
chr11	115655658	115660658	ENSG00000256717.1	LINC02698	+	115659658	lncRNA	122.348	-3.57026	0.408202	-8.74631	2.20441e-18	1.30186e-15
chr16	49274579	49279579	ENSG00000287469.1	ENSG00000287469	-	49275579	lncRNA	83.291	-3.56889	0.469794	-7.5967	3.0378e-14	7.18117e-12
chr18	6397020	6402020	ENSG00000279885.1	ENSG00000279885	-	6398020	TEC	46.1822	-3.56862	0.59529	-5.99475	2.03793e-09	1.61219e-07
chrX	153513642	153518642	ENSG00000067842.18	ATP2B3	+	153517642	protein_coding	51.9095	-3.56833	0.511666	-6.97396	3.08144e-12	4.74415e-10
chr22	49847425	49852425	ENSG00000279494.1	ENSG00000279494	+	49851425	lncRNA	38.6392	-3.56791	0.547397	-6.51795	7.12741e-11	8.11645e-09
chr11	105605994	105610994	ENSG00000152578.13	GRIA4	+	105609994	protein_coding	66.809	-3.56637	0.535881	-6.65515	2.83009e-11	3.51095e-09
chr11	70882090	70887090	ENSG00000286708.1	ENSG00000286708	+	70886090	lncRNA	65.9625	-3.56335	0.534512	-6.66655	2.6189e-11	3.27603e-09
chr14	60505146	60510146	ENSG00000184302.7	SIX6	+	60509146	protein_coding	72.4022	-3.56054	0.388783	-9.15816	5.27874e-20	4.2832e-17
chr14	105880053	105885053	ENSG00000211907.1	IGHD1-26	-	105881053	IG_D_gene	64.4411	-3.55777	0.49748	-7.15159	8.57798e-13	1.50162e-10
chr12	47075603	47080603	ENSG00000179715.13	PCED1B	+	47079603	protein_coding	89.5491	-3.55661	0.475067	-7.48654	7.07117e-14	1.53279e-11
chrX	93038490	93043490	ENSG00000237873.1	DLGAP5P2	+	93042490	processed_pseudogene	14.8134	-3.55445	0.884696	-4.01771	5.87663e-05	0.00133103
chr19	51457456	51462456	ENSG00000105366.15	SIGLEC8	-	51458456	protein_coding	41.0697	-3.55381	0.563698	-6.30447	2.89182e-10	2.82922e-08
chr8	2072589	2077589	ENSG00000273593.1	MIR7160	+	2076589	miRNA	76.3161	-3.55323	0.503709	-7.05412	1.73701e-12	2.83417e-10
chr7	71128144	71133144	ENSG00000185274.12	GALNT17	+	71132144	protein_coding	38.2379	-3.55281	0.667948	-5.31899	1.04347e-07	5.44343e-06
chrX	51681831	51686831	ENSG00000283093.1	CENPVL2	-	51682831	protein_coding	41.86	-3.54844	0.546341	-6.49492	8.30796e-11	9.27218e-09
chr4	9263619	9268619	ENSG00000248933.3	USP17L22	+	9267619	protein_coding	423.925	-3.54781	0.364786	-9.72572	2.34237e-22	4.26198e-19
chr13	111112697	111117697	ENSG00000286824.1	ENSG00000286824	-	111113697	lncRNA	81.3623	-3.54622	0.433319	-8.18385	2.74909e-16	9.88421e-14
chr2	94733337	94738337	ENSG00000213355.3	CNN2P8	+	94737337	processed_pseudogene	53.6442	-3.54385	0.468801	-7.55938	4.04995e-14	9.2462e-12
chr4	9220896	9225896	ENSG00000232399.4	USP17L13	+	9224896	protein_coding	237.692	-3.53603	0.341872	-10.3431	4.49571e-25	1.92815e-21
chr7	43112931	43117931	ENSG00000232006.9	ENSG00000232006	-	43113931	lncRNA	114.507	-3.53242	0.395744	-8.92604	4.41522e-19	2.94564e-16
chr8	54453935	54458935	ENSG00000164736.6	SOX17	+	54457935	protein_coding	54.4856	-3.53143	0.461034	-7.6598	1.86221e-14	4.6396e-12
chr19	46014932	46019932	ENSG00000211580.1	MIR769	+	46018932	miRNA	3.78072	-3.52947	1.91275	-1.84524	0.0650028	NA
chr7	157462231	157467231	ENSG00000234210.1	ENSG00000234210	+	157466231	lncRNA	106.259	-3.52861	0.457296	-7.71624	1.19814e-14	3.18325e-12
chr4	9354383	9359383	ENSG00000251694.1	USP17L9P	+	9358383	unprocessed_pseudogene	304.337	-3.52584	0.375879	-9.38027	6.5807e-21	7.74767e-18
chr2	2870231	2875231	ENSG00000228391.1	ENSG00000228391	-	2871231	lncRNA	34.1894	-3.52479	0.576118	-6.11818	9.46503e-10	8.07271e-08
chr7	142793239	142798239	ENSG00000211770.1	TRBJ2-6	+	142797239	TR_J_gene	158.881	-3.52371	0.648699	-5.43197	5.57339e-08	3.12464e-06
chr9	133632099	133637099	ENSG00000261018.1	ENSG00000261018	-	133633099	lncRNA	86.2876	-3.51896	0.416175	-8.45548	2.77949e-17	1.30384e-14
chr17	73643445	73648445	ENSG00000069188.17	SDK2	-	73644445	protein_coding	85.5397	-3.51837	0.45188	-7.78606	6.91314e-15	1.93968e-12
chr2	1579747	1584747	ENSG00000231482.3	ENSG00000231482	-	1580747	lncRNA	90.9415	-3.51741	0.406124	-8.66093	4.6794e-18	2.53126e-15
chr4	9239879	9244879	ENSG00000249104.3	USP17L17	+	9243879	protein_coding	334.965	-3.51315	0.341133	-10.2985	7.15883e-25	2.68653e-21
chr6	50814723	50819723	ENSG00000008196.13	TFAP2B	+	50818723	protein_coding	88.5966	-3.51153	0.454908	-7.71922	1.17046e-14	3.12352e-12
chr14	106480706	106485706	ENSG00000283464.1	ENSG00000283464	-	106481706	IG_V_pseudogene	23.9213	-3.51148	0.694494	-5.05617	4.27758e-07	1.89133e-05
chrX	316990	321990	ENSG00000226179.6	LINC00685	+	320990	lncRNA	8.79241	-3.51082	1.34301	-2.61414	0.00894527	0.0640866
chr8	141785313	141790313	ENSG00000221768.2	MIR1302-7	-	141786313	miRNA	75.5683	-3.50636	0.470357	-7.45467	9.00919e-14	1.91938e-11
chr11	112962460	112967460	ENSG00000247416.5	ENSG00000247416	-	112963460	lncRNA	70.0429	-3.50497	0.479101	-7.31572	2.56014e-13	4.9428e-11
chr2	133567463	133572463	ENSG00000176771.18	NCKAP5	-	133568463	protein_coding	55.2917	-3.50026	0.556858	-6.28573	3.26307e-10	3.13987e-08
chr7	142793119	142798119	ENSG00000211769.1	TRBJ2-5	+	142797119	TR_J_gene	154.924	-3.50009	0.460858	-7.59473	3.08425e-14	7.26239e-12
chr2	218960903	218965903	ENSG00000235024.1	CDK5R2-AS1	-	218961903	lncRNA	31.016	-3.49948	0.62817	-5.57091	2.53413e-08	1.5277e-06
chr2	107982523	107987523	ENSG00000115665.9	SLC5A7	+	107986523	protein_coding	47.329	-3.49893	0.570051	-6.13792	8.36079e-10	7.27559e-08
chr12	131619765	131624765	ENSG00000279455.1	ENSG00000279455	-	131620765	TEC	88.7524	-3.4947	0.483664	-7.22546	4.99409e-13	9.11445e-11
chr1	166164095	166169095	ENSG00000230898.1	ENSG00000230898	-	166165095	lncRNA	46.219	-3.49224	0.510838	-6.8363	8.12641e-12	1.14272e-09
chr14	24167853	24172853	ENSG00000100918.14	REC8	+	24171853	protein_coding	6.10582	-3.4875	1.78838	-1.95009	0.0511658	0.194974
chr22	25281674	25286674	ENSG00000233577.6	ENSG00000233577	-	25282674	lncRNA	95.1043	-3.48574	0.459592	-7.58444	3.33935e-14	7.77934e-12
chr4	9268364	9273364	ENSG00000250913.2	USP17L23	+	9272364	protein_coding	540.019	-3.48566	0.335044	-10.4036	2.38777e-25	1.20074e-21
chr18	2846850	2851850	ENSG00000289061.1	ENSG00000289061	-	2847850	lncRNA	57.2134	-3.48219	0.435584	-7.99432	1.30289e-15	4.1174e-13
chr7	150446630	150451630	ENSG00000171115.4	GIMAP8	+	150450630	protein_coding	50.5459	-3.48197	0.526494	-6.61351	3.75305e-11	4.516e-09
chrX	120972668	120977668	ENSG00000270646.1	ENSG00000270646	+	120976668	processed_pseudogene	4.67188	-3.48117	1.43135	-2.43208	0.0150122	0.0901997
chr10	26212665	26217665	ENSG00000136750.13	GAD2	+	26216665	protein_coding	55.3819	-3.47324	0.452721	-7.67193	1.69431e-14	4.29253e-12
chr22	43396331	43401331	ENSG00000236117.1	LINC01639	+	43400331	lncRNA	45.3091	-3.47288	0.502313	-6.91378	4.71902e-12	6.97903e-10
chr21	44710572	44715572	ENSG00000175894.18	TSPEAR	-	44711572	protein_coding	112.487	-3.46931	0.431503	-8.04006	8.97973e-16	2.89881e-13
chrX	22268913	22273913	ENSG00000175809.6	CBLL2	+	22272913	protein_coding	19.0867	-3.46834	0.837606	-4.14077	3.46135e-05	0.000843822
chrX	620344	625344	ENSG00000185960.15	SHOX	+	624344	protein_coding	25.9743	-3.46721	0.690484	-5.02142	5.129e-07	2.22037e-05
chr4	173990024	173995024	ENSG00000251216.2	ENSG00000251216	-	173991024	lncRNA	40.2339	-3.46715	0.486644	-7.12461	1.04373e-12	1.79057e-10
chr1	205451929	205456929	ENSG00000224717.1	LEMD1-DT	+	205455929	lncRNA	135.16	-3.46585	0.353314	-9.80957	1.02403e-22	2.12023e-19
chr1	166161852	166166852	ENSG00000229588.3	ENSG00000229588	+	166165852	lncRNA	95.4572	-3.46358	0.410112	-8.44545	3.02883e-17	1.38827e-14
chr8	23703141	23708141	ENSG00000253471.1	ENSG00000253471	+	23707141	lncRNA	52.1421	-3.46142	0.576669	-6.00244	1.94379e-09	1.54997e-07
chr7	142792998	142797998	ENSG00000211768.1	TRBJ2-4	+	142796998	TR_J_gene	151.057	-3.46002	0.460987	-7.50567	6.11133e-14	1.34908e-11
chr1	26045118	26050118	ENSG00000158014.15	SLC30A2	-	26046118	protein_coding	73.2755	-3.45993	0.486109	-7.11761	1.09817e-12	1.86267e-10
chrX	135819012	135824012	ENSG00000271449.8	CT45A2	-	135820012	protein_coding	52.1915	-3.45767	0.517564	-6.68065	2.37879e-11	3.03897e-09
chr18	22347252	22352252	ENSG00000273348.1	ENSG00000273348	-	22348252	lncRNA	66.1897	-3.45737	0.522032	-6.6229	3.52212e-11	4.2897e-09
chr2	5692220	5697220	ENSG00000242540.3	ENSG00000242540	+	5696220	lncRNA	34.1983	-3.45366	0.587894	-5.87463	4.23778e-09	3.12441e-07
chr20	40688236	40693236	ENSG00000204103.4	MAFB	-	40689236	protein_coding	73.1074	-3.45238	0.431824	-7.99488	1.29701e-15	4.1174e-13
chr8	54463208	54468208	ENSG00000274310.1	ENSG00000274310	+	54467208	unprocessed_pseudogene	95.7025	-3.4481	0.408055	-8.45008	2.91098e-17	1.34451e-14
chr7	72099181	72104181	ENSG00000228769.1	ABCF2P2	+	72103181	unprocessed_pseudogene	26.4839	-3.44745	0.734852	-4.69135	2.71408e-06	9.39276e-05
chr22	39238188	39243188	ENSG00000284633.2	ENSG00000284633	+	39242188	lncRNA	42.9531	-3.44648	0.522582	-6.59509	4.25003e-11	5.09359e-09
chr8	1014757	1019757	ENSG00000282692.1	ENSG00000282692	+	1018757	lncRNA	38.3162	-3.446	0.628461	-5.48323	4.17639e-08	2.40199e-06
chr12	131027060	131032060	ENSG00000279993.1	ENSG00000279993	-	131028060	TEC	71.1525	-3.44457	0.444402	-7.75102	9.11606e-15	2.51085e-12
chr21	44193338	44198338	ENSG00000285413.1	ENSG00000285413	-	44194338	lncRNA	12.8029	-3.443	0.919702	-3.7436	0.000181401	0.00340909
chr6	133885113	133890113	ENSG00000118526.7	TCF21	+	133889113	protein_coding	54.0224	-3.44269	0.519642	-6.62513	3.46942e-11	4.2341e-09
chr6	1075929	1080929	ENSG00000176515.1	ENSG00000176515	+	1079929	lncRNA	44.1654	-3.44196	0.537943	-6.39837	1.57049e-10	1.63146e-08
chr8	2133880	2138880	ENSG00000287970.1	ENSG00000287970	-	2134880	lncRNA	68.1184	-3.44148	0.496669	-6.92913	4.23448e-12	6.29344e-10
chrX	3345652	3350652	ENSG00000101825.8	MXRA5	-	3346652	protein_coding	72.9257	-3.44102	0.978507	-3.5166	0.000437108	0.00695251
chr22	36812326	36817326	ENSG00000234979.1	ENSG00000234979	+	36816326	lncRNA	122.687	-3.44041	0.410908	-8.37271	5.63092e-17	2.31577e-14
chr9	111037470	111042470	ENSG00000198121.15	LPAR1	-	111038470	protein_coding	64.5706	-3.43975	0.482954	-7.12231	1.06132e-12	1.8104e-10
chr4	9335403	9340403	ENSG00000227140.3	USP17L5	+	9339403	protein_coding	354.375	-3.43315	0.332667	-10.3201	5.71695e-25	2.28846e-21
chr18	6252747	6257747	ENSG00000264707.1	L3MBTL4-AS1	+	6256747	lncRNA	44.1952	-3.43219	0.576078	-5.95785	2.55581e-09	1.9827e-07
chr3	147369656	147374656	ENSG00000243620.2	ENSG00000243620	-	147370656	lncRNA	115.932	-3.43008	0.421556	-8.1367	4.06207e-16	1.39373e-13
chr8	3696492	3701492	ENSG00000222546.1	RNA5SP251	+	3700492	rRNA_pseudogene	63.4972	-3.42627	0.519674	-6.59313	4.30663e-11	5.1411e-09
chr8	2152683	2157683	ENSG00000289036.2	ENSG00000289036	+	2156683	lncRNA	62.1365	-3.42499	0.43612	-7.85333	4.05141e-15	1.18665e-12
chr20	54471593	54476593	ENSG00000101134.12	DOK5	+	54475593	protein_coding	77.7213	-3.4221	0.468943	-7.29747	2.9323e-13	5.58944e-11
chrX	48333439	48338439	ENSG00000230100.1	ENSG00000230100	-	48334439	lncRNA	14.9552	-3.42191	0.754614	-4.53465	5.76986e-06	0.000180347
chr16	87333273	87338273	ENSG00000131152.4	ENSG00000131152	-	87334273	protein_coding	2.5645	-3.41753	2.33553	-1.46328	0.143392	NA
chr17	44217369	44222369	ENSG00000260793.4	ENSG00000260793	+	44221369	lncRNA	2.88984	-3.41734	2.3281	-1.46787	0.14214	NA
chr16	86282427	86287427	ENSG00000268532.1	LINC02135	+	86286427	lncRNA	33.488	-3.41459	0.599864	-5.69228	1.25356e-08	8.23512e-07
chrX	40167944	40172944	ENSG00000288856.2	ENSG00000288856	+	40171944	lncRNA	2.43341	-3.41348	2.19513	-1.55503	0.11994	NA
chr9	90212039	90217039	ENSG00000185074.7	OR7E31P	+	90216039	unprocessed_pseudogene	63.5555	-3.4132	0.526304	-6.48523	8.8599e-11	9.79891e-09
chr2	130247568	130252568	ENSG00000236595.1	MED15P5	+	130251568	processed_pseudogene	94.4866	-3.41288	0.457714	-7.45637	8.89364e-14	1.90718e-11
chr9	133632363	133637363	ENSG00000123454.12	DBH	+	133636363	protein_coding	88.9095	-3.4126	0.413143	-8.26008	1.45574e-16	5.56744e-14
chr13	111118652	111123652	ENSG00000233644.1	ARHGEF7-IT1	+	111122652	lncRNA	58.4713	-3.41248	0.465432	-7.33186	2.26985e-13	4.4201e-11
chr8	144056380	144061380	ENSG00000277888.1	MIR6846	-	144057380	miRNA	4.18094	-3.41177	2.14546	-1.59023	0.111782	0.310734
chr19	48057371	48062371	ENSG00000269420.5	PLA2G4C-AS1	+	48061371	lncRNA	27.6579	-3.41162	0.668952	-5.09995	3.39738e-07	1.5454e-05
chr11	123194248	123199248	ENSG00000166250.12	CLMP	-	123195248	protein_coding	79.5949	-3.41075	0.480279	-7.1016	1.2332e-12	2.05684e-10
chr19	2717710	2722710	ENSG00000286460.1	ENSG00000286460	+	2721710	lncRNA	4.5565	-3.41069	2.11634	-1.6116	0.107049	0.303248
chr8	144393230	144398230	ENSG00000284310.1	MIR939	-	144394230	miRNA	4.88921	-3.40769	2.04366	-1.66744	0.0954265	0.284271
chr7	142792847	142797847	ENSG00000211767.1	TRBJ2-3	+	142796847	TR_J_gene	148.017	-3.40721	0.462635	-7.36479	1.77419e-13	3.53919e-11
chr4	73993933	73998933	ENSG00000287037.1	ENSG00000287037	+	73997933	lncRNA	64.5643	-3.40643	0.467245	-7.29046	3.08905e-13	5.81533e-11
chr1	153674688	153679688	ENSG00000169418.10	NPR1	+	153678688	protein_coding	11.0564	-3.4064	1.01922	-3.34217	0.000831263	0.0115538
chrX	83508214	83513214	ENSG00000279437.1	ENSG00000279437	-	83509214	TEC	14.1754	-3.40475	0.809914	-4.20385	2.62416e-05	0.000664831
chr15	88799436	88804436	ENSG00000157766.19	ACAN	+	88803436	protein_coding	220.59	-3.40139	0.36033	-9.43965	3.74032e-21	4.58334e-18
chr2	2700812	2705812	ENSG00000287583.1	ENSG00000287583	-	2701812	lncRNA	84.9914	-3.4008	0.523387	-6.49769	8.15628e-11	9.11984e-09
chr1	154501412	154506412	ENSG00000169291.10	SHE	-	154502412	protein_coding	52.4635	-3.39848	0.494339	-6.87481	6.20747e-12	8.93816e-10
chr22	49368924	49373924	ENSG00000285722.1	ENSG00000285722	+	49372924	lncRNA	74.2655	-3.39052	0.447956	-7.56888	3.76459e-14	8.69388e-12
chr20	62560912	62565912	ENSG00000284508.1	MIR133A2	+	62564912	miRNA	86.1169	-3.38873	0.435331	-7.78426	7.01239e-15	1.94984e-12
chr19	54246322	54251322	ENSG00000249189.1	ENSG00000249189	-	54247322	unprocessed_pseudogene	100.918	-3.3885	0.396698	-8.54176	1.32196e-17	6.45331e-15
chr8	2727577	2732577	ENSG00000254319.6	LINC03021	-	2728577	lncRNA	63.0513	-3.38811	0.516304	-6.56224	5.30063e-11	6.25287e-09
chr7	151405161	151410161	ENSG00000243836.7	WDR86-AS1	+	151409161	lncRNA	17.8106	-3.38776	0.832954	-4.06716	4.75894e-05	0.00111445
chr21	41714775	41719775	ENSG00000236384.7	LINC00479	-	41715775	lncRNA	63.2634	-3.38602	0.465062	-7.28078	3.319e-13	6.18901e-11
chr8	78804523	78809523	ENSG00000104432.14	IL7	-	78805523	protein_coding	63.8918	-3.38558	0.464413	-7.29001	3.09923e-13	5.81533e-11
chr10	3501915	3506915	ENSG00000233321.4	LINC02669	-	3502915	lncRNA	39.2039	-3.38433	0.654109	-5.17395	2.29202e-07	1.08964e-05
chr3	54118547	54123547	ENSG00000157445.15	CACNA2D3	+	54122547	protein_coding	46.5841	-3.38215	0.47596	-7.10596	1.19489e-12	1.99849e-10
chr2	213151427	213156427	ENSG00000030419.17	IKZF2	-	213152427	protein_coding	39.7625	-3.38117	0.610549	-5.53791	3.06095e-08	1.81433e-06
chr10	2495721	2500721	ENSG00000237500.1	ENSG00000237500	+	2499721	lncRNA	46.759	-3.38059	0.618719	-5.46386	4.659e-08	2.6495e-06
chr11	89974540	89979540	ENSG00000255305.1	ENSG00000255305	+	89978540	unprocessed_pseudogene	63.9128	-3.37964	0.489943	-6.89804	5.27266e-12	7.70295e-10
chr7	142792697	142797697	ENSG00000211766.1	TRBJ2-2P	+	142796697	TR_J_gene	145.278	-3.37752	0.464021	-7.2788	3.36804e-13	6.26101e-11
chr20	61248261	61253261	ENSG00000179242.16	CDH4	+	61252261	protein_coding	100.783	-3.37679	0.414357	-8.14946	3.65565e-16	1.26879e-13
chr4	9325911	9330911	ENSG00000230430.5	USP17L25	+	9329911	protein_coding	345.159	-3.37635	0.347647	-9.712	2.68029e-22	4.47042e-19
chr1	2526064	2531064	ENSG00000272449.3	ENSG00000272449	+	2530064	lncRNA	6.10052	-3.37608	1.99882	-1.68904	0.0912124	0.276828
chr1	2525597	2530597	ENSG00000157881.16	PANK4	-	2526597	protein_coding	5.87183	-3.37598	2.00119	-1.68698	0.0916066	0.277505
chr16	2154405	2159405	ENSG00000260260.3	SNHG19	-	2155405	lncRNA	5.36487	-3.37565	2.0084	-1.68077	0.0928078	0.279674
chr12	132325850	132330850	ENSG00000255916.1	ENSG00000255916	+	132329850	lncRNA	112.534	-3.37464	0.390937	-8.63217	6.01976e-18	3.11595e-15
chrX	52062474	52067474	ENSG00000221705.1	SNORA11E	-	52063474	snoRNA	4.016	-3.37402	2.04608	-1.64902	0.0991443	NA
chr20	63735776	63740776	ENSG00000125520.14	SLC2A4RG	+	63739776	protein_coding	4.10988	-3.37245	2.08543	-1.61715	0.105846	0.301404
chr8	13156178	13161178	ENSG00000200630.1	Y_RNA	+	13160178	misc_RNA	44.6538	-3.3722	0.575647	-5.85811	4.68178e-09	3.39919e-07
chr14	105909427	105914427	ENSG00000228131.1	IGHD6-6	-	105910427	IG_D_gene	48.6793	-3.37118	0.537988	-6.26629	3.6976e-10	3.51296e-08
chrX	143719752	143724752	ENSG00000268988.2	SPANXN2	-	143720752	protein_coding	12.7949	-3.37083	0.815933	-4.13125	3.60789e-05	0.000876343
chr21	39611910	39616910	ENSG00000184809.13	B3GALT5-AS1	-	39612910	lncRNA	61.9753	-3.3699	0.536149	-6.28538	3.27063e-10	3.1421e-08
chr3	47659626	47664626	ENSG00000235695.1	HIGD2AP2	+	47663626	processed_pseudogene	4.11434	-3.36979	2.16006	-1.56004	0.11875	0.321625
chr2	131329857	131334857	ENSG00000227817.4	ARHGAP42P1	-	131330857	unprocessed_pseudogene	49.8045	-3.36964	0.50859	-6.62545	3.46185e-11	4.23347e-09
chr12	122976060	122981060	ENSG00000182196.14	ARL6IP4	+	122980060	protein_coding	3.76227	-3.36894	2.18646	-1.54082	0.12336	NA
chr16	81031842	81036842	ENSG00000166454.10	ATMIN	+	81035842	protein_coding	2.73723	-3.36796	2.21838	-1.51821	0.128961	NA
chr10	3276649	3281649	ENSG00000288657.1	ENSG00000288657	-	3277649	lncRNA	86.1648	-3.36791	0.453307	-7.42965	1.08886e-13	2.28601e-11
chrX	30667635	30672635	ENSG00000229331.1	GK-IT1	+	30671635	lncRNA	2.38205	-3.36784	2.22252	-1.51533	0.12969	NA
chr9	90751230	90756230	ENSG00000270432.1	OR7E108P	-	90752230	unprocessed_pseudogene	62.2153	-3.36619	0.487314	-6.90764	4.92779e-12	7.23433e-10
chr2	218984184	218989184	ENSG00000163497.3	FEV	-	218985184	protein_coding	127.715	-3.36582	0.400181	-8.41074	4.07448e-17	1.77281e-14
chr7	159103761	159108761	ENSG00000287184.1	ENSG00000287184	+	159107761	lncRNA	92.9599	-3.36418	0.431148	-7.80283	6.05327e-15	1.73077e-12
chrX	47186861	47191861	ENSG00000130985.17	UBA1	+	47190861	protein_coding	2.46161	-3.36325	2.40253	-1.39988	0.16155	NA
chrX	120933762	120938762	ENSG00000270493.1	ENSG00000270493	+	120937762	processed_pseudogene	3.43004	-3.36218	1.68289	-1.99786	0.0457321	NA
chr8	13625644	13630644	ENSG00000286798.1	ENSG00000286798	+	13629644	lncRNA	44.6492	-3.36199	0.584335	-5.75353	8.74001e-09	5.93649e-07
chr12	5428108	5433108	ENSG00000185652.12	NTF3	+	5432108	protein_coding	88.4879	-3.35811	0.51426	-6.52999	6.5776e-11	7.55153e-09
chr8	143429732	143434732	ENSG00000182759.4	MAFA	-	143430732	protein_coding	6.27987	-3.35793	1.16093	-2.89244	0.0038226	0.0361513
chr13	27788483	27793483	ENSG00000169840.5	GSX1	+	27792483	protein_coding	115.067	-3.35731	0.407577	-8.23725	1.76219e-16	6.65465e-14
chrX	1392427	1397427	ENSG00000236871.7	LINC00106	+	1396427	lncRNA	3.82579	-3.35529	2.9151	-1.151	0.249731	NA
chrX	102802741	102807741	ENSG00000229794.2	MTCYBP32	+	102806741	processed_pseudogene	3.13525	-3.35309	3.14531	-1.06606	0.286396	NA
chr16	1068747	1073747	ENSG00000162009.9	SSTR5	+	1072747	protein_coding	42.1492	-3.35264	0.520867	-6.43665	1.2214e-10	1.30031e-08
chr4	8265754	8270754	ENSG00000170801.10	HTRA3	+	8269754	protein_coding	18.056	-3.35261	0.771581	-4.34511	1.39204e-05	0.000387499
chr13	108476226	108481226	ENSG00000232087.1	HCFC2P1	+	108480226	processed_pseudogene	51.949	-3.34959	0.550057	-6.08953	1.13241e-09	9.52302e-08
chrX	135784503	135789503	ENSG00000228836.9	CT45A5	-	135785503	protein_coding	36.7746	-3.34873	0.585528	-5.71917	1.07046e-08	7.11003e-07
chr4	9249378	9254378	ENSG00000248920.3	USP17L19	+	9253378	protein_coding	352.508	-3.34828	0.364016	-9.19816	3.64143e-20	3.29483e-17
chrX	49001264	49006264	ENSG00000068400.13	GRIPAP1	-	49002264	protein_coding	2.52346	-3.34599	2.20618	-1.51664	0.129357	NA
chr1	234214088	234219088	ENSG00000233332.1	ENSG00000233332	-	234215088	lncRNA	61.1993	-3.34397	0.548154	-6.10042	1.05793e-09	8.97209e-08
chr4	121067429	121072429	ENSG00000250344.1	NDNF-AS1	+	121071429	lncRNA	42.5689	-3.34387	0.53114	-6.29566	3.061e-10	2.97402e-08
chr11	89904540	89909540	ENSG00000255055.1	MTND1P35	+	89908540	processed_pseudogene	61.1104	-3.34374	0.493114	-6.78086	1.19465e-11	1.61944e-09
chr8	3374226	3379226	ENSG00000253162.1	ENSG00000253162	-	3375226	lncRNA	75.2092	-3.34183	0.431502	-7.74463	9.58616e-15	2.60449e-12
chr13	109785583	109790583	ENSG00000185950.9	IRS2	-	109786583	protein_coding	38.9528	-3.3412	0.518327	-6.44613	1.14746e-10	1.23032e-08
chr17	2751705	2756705	ENSG00000132359.16	RAP1GAP2	+	2755705	protein_coding	29.1152	-3.33578	0.625694	-5.33133	9.74972e-08	5.15328e-06
chr7	157850529	157855529	ENSG00000233038.7	PTPRN2-AS1	+	157854529	lncRNA	56.1738	-3.33389	0.476127	-7.00211	2.52129e-12	3.94241e-10
chr2	130274036	130279036	ENSG00000283940.1	MTND3P15	+	130278036	unprocessed_pseudogene	52.3857	-3.33093	0.514913	-6.46892	9.87051e-11	1.07894e-08
chr13	110135906	110140906	ENSG00000287575.1	ENSG00000287575	-	110136906	lncRNA	84.2627	-3.32635	0.498312	-6.67524	2.4683e-11	3.13997e-09
chr6	84765010	84770010	ENSG00000287294.1	ENSG00000287294	+	84769010	lncRNA	57.266	-3.32579	0.503222	-6.609	3.86937e-11	4.64665e-09
chr1	207492147	207497147	ENSG00000203710.12	CR1	+	207496147	protein_coding	89.6783	-3.3204	0.435223	-7.62919	2.36231e-14	5.69648e-12
chr2	109759364	109764364	ENSG00000282033.1	ENSG00000282033	-	109760364	lncRNA	91.1381	-3.31844	0.432861	-7.66628	1.77057e-14	4.42968e-12
chr8	2491522	2496522	ENSG00000282686.1	ENSG00000282686	+	2495522	lncRNA	52.0045	-3.31752	0.554612	-5.98169	2.20828e-09	1.73552e-07
chr11	123354428	123359428	ENSG00000023171.20	GRAMD1B	+	123358428	protein_coding	84.4748	-3.31682	0.433602	-7.64946	2.0182e-14	4.96643e-12
chr22	39243982	39248982	ENSG00000100311.17	PDGFB	-	39244982	protein_coding	62.7672	-3.31263	0.418548	-7.91459	2.48078e-15	7.5612e-13
chr2	238788716	238793716	ENSG00000226992.1	ENSG00000226992	-	238789716	lncRNA	67.7667	-3.31232	0.477696	-6.93395	4.09242e-12	6.11257e-10
chr19	1749506	1754506	ENSG00000205922.5	ONECUT3	+	1753506	protein_coding	96.6929	-3.31217	0.380375	-8.70764	3.10272e-18	1.75755e-15
chr11	2928420	2933420	ENSG00000181649.8	PHLDA2	-	2929420	protein_coding	70.685	-3.31148	0.435497	-7.60391	2.87312e-14	6.84578e-12
chr7	159143867	159148867	ENSG00000106018.14	VIPR2	-	159144867	protein_coding	53.614	-3.31083	0.53994	-6.13185	8.6862e-10	7.51519e-08
chr20	57891394	57896394	ENSG00000263453.1	ENSG00000263453	+	57895394	miRNA	88.1819	-3.30973	0.444151	-7.45182	9.20586e-14	1.9532e-11
chrX	73001856	73006856	ENSG00000226725.2	PABPC1L2B-AS1	-	73002856	lncRNA	25.2579	-3.30966	0.722275	-4.58227	4.59958e-06	0.000148963
chr2	222420543	222425543	ENSG00000163082.10	SGPP2	+	222424543	protein_coding	80.1834	-3.30964	0.408649	-8.09897	5.54273e-16	1.85926e-13
chr14	70188070	70193070	ENSG00000100678.19	SLC8A3	-	70189070	protein_coding	90.3977	-3.30892	0.457129	-7.23848	4.53731e-13	8.33144e-11
chr4	8588660	8593660	ENSG00000109625.19	CPZ	+	8592660	protein_coding	115.56	-3.30876	0.393545	-8.40758	4.18545e-17	1.80799e-14
chr21	44930989	44935989	ENSG00000160255.19	ITGB2	-	44931989	protein_coding	50.7361	-3.308	0.480415	-6.88572	5.74966e-12	8.33896e-10
chrX	104562199	104567199	ENSG00000189108.13	IL1RAPL2	+	104566199	protein_coding	44.4107	-3.30672	0.52246	-6.32915	2.46522e-10	2.45883e-08
chr7	155811463	155816463	ENSG00000164690.8	SHH	-	155812463	protein_coding	81.5567	-3.306	0.484346	-6.8257	8.74976e-12	1.21614e-09
chr21	44932303	44937303	ENSG00000272825.1	ENSG00000272825	+	44936303	lncRNA	23.9032	-3.30527	0.70205	-4.70803	2.50116e-06	8.80685e-05
chr13	109277973	109282973	ENSG00000223617.2	LINC00370	+	109281973	lncRNA	40.6576	-3.30508	0.562449	-5.87624	4.19685e-09	3.09958e-07
chr7	71938259	71943259	ENSG00000235581.1	ENSG00000235581	+	71942259	processed_pseudogene	21.9517	-3.30238	1.36907	-2.41213	0.0158598	0.0933468
chr8	7558712	7563712	ENSG00000285975.1	FAM90A7	-	7559712	protein_coding	71.904	-3.30212	0.471569	-7.00242	2.51584e-12	3.94241e-10
chr4	9244630	9249630	ENSG00000250844.3	USP17L18	+	9248630	protein_coding	378.037	-3.30194	0.366819	-9.00156	2.22528e-19	1.55311e-16
chr20	61365879	61370879	ENSG00000276786.1	ENSG00000276786	+	61369879	lncRNA	69.9438	-3.30011	0.470971	-7.00705	2.43404e-12	3.8259e-10
chr4	9349638	9354638	ENSG00000231637.3	USP17L29	+	9353638	protein_coding	282.657	-3.29956	0.360434	-9.15441	5.46546e-20	4.318e-17
chr8	72192334	72197334	ENSG00000253317.1	ENSG00000253317	+	72196334	lncRNA	60.383	-3.2981	0.50659	-6.5104	7.4952e-11	8.45943e-09
chr4	3629029	3634029	ENSG00000250681.1	ENSG00000250681	+	3633029	lncRNA	69.4912	-3.29752	0.524532	-6.2866	3.24501e-10	3.1275e-08
chr7	157610023	157615023	ENSG00000222012.1	ENSG00000222012	+	157614023	lncRNA	44.1978	-3.29608	0.562964	-5.85488	4.77363e-09	3.45751e-07
chr4	9225641	9230641	ENSG00000249482.1	USP17L14P	+	9229641	unprocessed_pseudogene	261.973	-3.29493	0.366089	-9.00033	2.25035e-19	1.55311e-16
chr21	44237575	44242575	ENSG00000278158.2	ENSG00000278158	+	44241575	lncRNA	15.8367	-3.29312	1.35715	-2.42649	0.0152457	0.0911038
chr19	48389668	48394668	ENSG00000105464.4	GRIN2D	+	48393668	protein_coding	12.7803	-3.29029	0.857717	-3.8361	0.000125002	0.00249107
chr17	79610051	79615051	ENSG00000167281.20	RBFOX3	-	79611051	protein_coding	68.073	-3.28884	0.442825	-7.42694	1.1114e-13	2.31712e-11
chrX	317796	322796	ENSG00000178605.14	GTPBP6	-	318796	protein_coding	11.7788	-3.28843	1.0705	-3.07187	0.00212721	0.0237348
chr21	38499562	38504562	ENSG00000287470.1	ENSG00000287470	+	38503562	lncRNA	50.8096	-3.28731	0.493826	-6.65683	2.79795e-11	3.48548e-09
chrX	71762075	71767075	ENSG00000234442.4	ENSG00000234442	-	71763075	transcribed_unprocessed_pseudogene	44.8365	-3.28601	0.492317	-6.67458	2.47949e-11	3.14753e-09
chr5	40837308	40842308	ENSG00000132357.14	CARD6	+	40841308	protein_coding	33.1772	-3.28426	0.585587	-5.6085	2.04086e-08	1.26071e-06
chr11	89998741	90003741	ENSG00000225581.3	TRIM53AP	-	89999741	unprocessed_pseudogene	65.4695	-3.28385	0.52144	-6.29765	3.02196e-10	2.94109e-08
chr1	165444355	165449355	ENSG00000143171.13	RXRG	-	165445355	protein_coding	85.8644	-3.28286	0.429744	-7.6391	2.18743e-14	5.33911e-12
chr2	131331502	131336502	ENSG00000284706.1	ENSG00000284706	+	131335502	unprocessed_pseudogene	54.5197	-3.28093	0.472949	-6.93717	4.0003e-12	6.0199e-10
chr20	7863327	7868327	ENSG00000277315.1	ENSG00000277315	+	7867327	processed_pseudogene	73.9844	-3.27466	0.507602	-6.45124	1.10941e-10	1.20024e-08
chr7	142792560	142797560	ENSG00000211765.1	TRBJ2-2	+	142796560	TR_J_gene	144.092	-3.27466	0.654274	-5.00503	5.58525e-07	2.39886e-05
chr13	26759786	26764786	ENSG00000132975.8	GPR12	-	26760786	protein_coding	103.852	-3.27355	0.434259	-7.53824	4.76352e-14	1.07124e-11
chr4	9340148	9345148	ENSG00000235780.3	USP17L27	+	9344148	protein_coding	338.182	-3.26984	0.382981	-8.53787	1.36713e-17	6.56704e-15
chr9	81685713	81690713	ENSG00000233926.2	TLE1-DT	+	81689713	lncRNA	54.0426	-3.26905	0.469229	-6.96684	3.24128e-12	4.96478e-10
chr7	68237637	68242637	ENSG00000237754.1	ENSG00000237754	+	68241637	processed_pseudogene	20.6151	-3.26903	0.766894	-4.26269	2.01977e-05	0.000530512
chr2	6769311	6774311	ENSG00000205837.7	LINC00487	-	6770311	lncRNA	85.1545	-3.26609	0.42372	-7.70813	1.27671e-14	3.36221e-12
chr3	26621943	26626943	ENSG00000225386.2	LRRC3B-AS1	-	26622943	lncRNA	103.736	-3.26606	0.493658	-6.61603	3.68977e-11	4.44877e-09
chr20	63151087	63156087	ENSG00000286628.1	ENSG00000286628	-	63152087	lncRNA	106.36	-3.26529	0.439548	-7.42875	1.09625e-13	2.29349e-11
chr16	1917415	1922415	ENSG00000162040.7	HS3ST6	-	1918415	protein_coding	59.9081	-3.26454	0.45713	-7.14138	9.24009e-13	1.59466e-10
chr5	176130461	176135461	ENSG00000251458.1	ENSG00000251458	-	176131461	lncRNA	70.3512	-3.26359	0.454941	-7.17366	7.30177e-13	1.30874e-10
chr14	105617116	105622116	ENSG00000274172.1	MIR8071-1	+	105621116	miRNA	77.6735	-3.26283	0.445427	-7.32516	2.38613e-13	4.62171e-11
chr16	89084375	89089375	ENSG00000176715.17	ACSF3	+	89088375	protein_coding	46.3098	-3.25784	0.500143	-6.51382	7.3264e-11	8.28448e-09
chr7	43113896	43118896	ENSG00000181211.1	HECW1-IT1	+	43117896	lncRNA	120.172	-3.25437	0.41131	-7.91222	2.52836e-15	7.66731e-13
chr21	41711806	41716806	ENSG00000232401.2	LINC00112	+	41715806	lncRNA	61.1172	-3.25387	0.478661	-6.79787	1.06177e-11	1.45554e-09
chr16	1279544	1284544	ENSG00000260991.2	ENSG00000260991	-	1280544	unprocessed_pseudogene	67.273	-3.25344	0.449458	-7.23858	4.53398e-13	8.33144e-11
chr13	109265634	109270634	ENSG00000275216.2	ENSG00000275216	+	109269634	lncRNA	65.1461	-3.25285	0.531152	-6.12414	9.11746e-10	7.8431e-08
chr1	6446006	6451006	ENSG00000231868.1	ENSG00000231868	-	6447006	lncRNA	50.8186	-3.25278	0.480118	-6.77495	1.24447e-11	1.67916e-09
chr4	9321165	9326165	ENSG00000232264.5	USP17L24	+	9325165	protein_coding	308.754	-3.25172	0.326299	-9.96545	2.15885e-23	5.40108e-20
chrX	120948344	120953344	ENSG00000270397.1	ENSG00000270397	+	120952344	processed_pseudogene	3.02157	-3.25117	1.8944	-1.7162	0.0861255	NA
chr2	10907934	10912934	ENSG00000162975.5	KCNF1	+	10911934	protein_coding	33.9756	-3.2495	0.563337	-5.76831	8.00692e-09	5.48821e-07
chr2	94734844	94739844	ENSG00000227265.2	GXYLT1P7	-	94735844	processed_pseudogene	37.3918	-3.24093	0.53681	-6.03738	1.56633e-09	1.28132e-07
chr2	232486834	232491834	ENSG00000171551.12	ECEL1	-	232487834	protein_coding	24.4936	-3.24092	0.677945	-4.78051	1.74854e-06	6.43318e-05
chrX	544352	549352	ENSG00000229232.6	KRT18P53	-	545352	processed_pseudogene	28.9826	-3.23724	0.621174	-5.2115	1.87324e-07	9.10743e-06
chr7	155378076	155383076	ENSG00000218672.1	LINC03010	+	155382076	lncRNA	44.2704	-3.23567	0.466499	-6.93608	4.03138e-12	6.0515e-10
chr20	63101631	63106631	ENSG00000231133.8	HAR1B	-	63102631	lncRNA	37.5146	-3.23531	0.522921	-6.18701	6.13175e-10	5.49514e-08
chr11	1035718	1040718	ENSG00000184956.16	MUC6	-	1036718	protein_coding	31.7997	-3.23192	0.61075	-5.29172	1.21174e-07	6.18162e-06
chr7	69121270	69126270	ENSG00000200189.1	RNU6-832P	+	69125270	snRNA	37.5785	-3.22971	0.626103	-5.15844	2.4902e-07	1.1718e-05
chr11	124861432	124866432	ENSG00000154134.15	ROBO3	+	124865432	protein_coding	107.196	-3.22658	0.350099	-9.21621	3.07789e-20	2.98079e-17
chr9	114151537	114156537	ENSG00000196739.15	COL27A1	+	114155537	protein_coding	24.8796	-3.22638	0.69689	-4.62968	3.66226e-06	0.000122233
chr22	19025524	19030524	ENSG00000286025.2	FAM246C	+	19029524	protein_coding	43.6195	-3.22602	0.529591	-6.09152	1.11843e-09	9.42188e-08
chr5	1886236	1891236	ENSG00000113430.10	IRX4	-	1887236	protein_coding	60.325	-3.22152	0.457088	-7.04791	1.81621e-12	2.95534e-10
chr16	84295985	84300985	ENSG00000260530.1	ENSG00000260530	-	84296985	lncRNA	30.8947	-3.22127	0.685163	-4.70146	2.58308e-06	9.04364e-05
chr14	94961976	94966976	ENSG00000258933.1	LINC02279	-	94962976	lncRNA	99.2644	-3.22092	0.441821	-7.2901	3.0972e-13	5.81533e-11
chr2	226834943	226839943	ENSG00000290086.1	ENSG00000290086	-	226835943	lncRNA	34.7433	-3.22088	0.59737	-5.39177	6.97674e-08	3.86094e-06
chr12	132279900	132284900	ENSG00000278872.1	ENSG00000278872	-	132280900	TEC	38.693	-3.22069	0.581011	-5.54325	2.96914e-08	1.76689e-06
chr20	23085324	23090324	ENSG00000125810.10	CD93	-	23086324	protein_coding	44.6815	-3.2195	0.631369	-5.09923	3.41038e-07	1.55013e-05
chrX	146549728	146554728	ENSG00000226388.1	ELL2P4	+	146553728	processed_pseudogene	8.28758	-3.21939	1.06525	-3.02219	0.00250951	0.0267878
chr1	143651215	143656215	ENSG00000202167.1	RNU1-114P	-	143652215	snRNA	86.82	-3.2154	0.448942	-7.16217	7.94091e-13	1.40237e-10
chr1	3017467	3022467	ENSG00000169717.7	ACTRT2	+	3021467	protein_coding	102.511	-3.21479	0.390067	-8.24163	1.69874e-16	6.45563e-14
chr3	22372321	22377321	ENSG00000151789.12	ZNF385D	-	22373321	protein_coding	75.2767	-3.21399	0.428521	-7.50018	6.37287e-14	1.39988e-11
chr2	181679665	181684665	ENSG00000188452.15	CERKL	-	181680665	protein_coding	40.4289	-3.21274	0.494884	-6.49191	8.47573e-11	9.44187e-09
chr12	57087063	57092063	ENSG00000166881.10	NEMP1	-	57088063	protein_coding	5.057	-3.21185	1.39564	-2.30135	0.021372	0.113242
chr2	237506931	237511931	ENSG00000277842.1	MIR6811	+	237510931	miRNA	93.5369	-3.21162	0.426234	-7.53486	4.8886e-14	1.09119e-11
chr12	131596115	131601115	ENSG00000255704.1	ENSG00000255704	-	131597115	processed_pseudogene	97.7812	-3.21135	0.423953	-7.57477	3.59762e-14	8.34038e-12
chr20	46993596	46998596	ENSG00000226769.1	GAPDHP54	+	46997596	processed_pseudogene	43.4706	-3.21007	0.583107	-5.50511	3.68929e-08	2.15696e-06
chr13	64075044	64080044	ENSG00000227674.3	LINC00355	-	64076044	lncRNA	6.69438	-3.2099	1.40485	-2.28487	0.0223204	0.116226
chr4	9235130	9240130	ENSG00000250231.1	USP17L16P	+	9239130	unprocessed_pseudogene	311.282	-3.20752	0.348599	-9.20117	3.54061e-20	3.29483e-17
chr6	39313461	39318461	ENSG00000124780.14	KCNK17	-	39314461	protein_coding	76.8031	-3.20696	0.452706	-7.08398	1.40074e-12	2.32338e-10
chr10	77583049	77588049	ENSG00000199592.1	RNA5SP321	+	77587049	rRNA_pseudogene	31.4097	-3.20606	0.605912	-5.2913	1.21452e-07	6.19056e-06
chr12	130949907	130954907	ENSG00000111452.13	ADGRD1	+	130953907	protein_coding	109.806	-3.20514	0.392689	-8.16202	3.29469e-16	1.16369e-13
chr1	224615220	224620220	ENSG00000233384.3	CNIH3-AS2	-	224616220	lncRNA	121.306	-3.20419	0.406989	-7.87292	3.46453e-15	1.02982e-12
chr2	384412	389412	ENSG00000236856.1	ENSG00000236856	+	388412	lncRNA	62.1782	-3.20367	0.519923	-6.16182	7.19115e-10	6.34978e-08
chr1	202189799	202194799	ENSG00000133067.18	LGR6	+	202193799	protein_coding	45.7619	-3.20344	0.504048	-6.35543	2.07849e-10	2.14067e-08
chr7	1691450	1696450	ENSG00000234977.1	ENSG00000234977	-	1692450	lncRNA	43.2628	-3.20063	0.540473	-5.92191	3.18232e-09	2.41262e-07
chr19	17025815	17030815	ENSG00000160111.15	CPAMD8	-	17026815	protein_coding	40.9646	-3.20026	0.511937	-6.25128	4.07097e-10	3.8313e-08
chr10	3259346	3264346	ENSG00000227338.2	ENSG00000227338	+	3263346	lncRNA	80.4584	-3.19942	0.438406	-7.29784	2.92413e-13	5.58944e-11
chrX	135836280	135841280	ENSG00000273696.5	CT45A7	-	135837280	protein_coding	33.1282	-3.19821	0.616026	-5.19168	2.08408e-07	1.00189e-05
chrX	6060749	6065749	ENSG00000252291.1	ENSG00000252291	-	6061749	snoRNA	37.3923	-3.19657	0.641476	-4.98314	6.256e-07	2.63974e-05
chr18	5894955	5899955	ENSG00000206432.4	TMEM200C	-	5895955	protein_coding	97.7165	-3.19364	0.408989	-7.80862	5.78186e-15	1.66907e-12
chr7	142792365	142797365	ENSG00000211764.1	TRBJ2-1	+	142796365	TR_J_gene	142.824	-3.19323	0.666157	-4.79351	1.63885e-06	6.09308e-05
chr1	1165357	1170357	ENSG00000272141.1	ENSG00000272141	+	1169357	lncRNA	72.7128	-3.19283	0.445997	-7.15884	8.13606e-13	1.43262e-10
chr13	109724282	109729282	ENSG00000234854.1	LINC00676	+	109728282	lncRNA	65.029	-3.19253	0.509962	-6.26033	3.84153e-10	3.63245e-08
chr6	46734693	46739693	ENSG00000146070.17	PLA2G7	-	46735693	protein_coding	74.1115	-3.19088	0.444864	-7.17271	7.35271e-13	1.31395e-10
chr12	126187151	126192151	ENSG00000255595.5	ENSG00000255595	+	126191151	lncRNA	41.9444	-3.19037	0.529506	-6.02519	1.68915e-09	1.37259e-07
chr10	104637290	104642290	ENSG00000156395.14	SORCS3	+	104641290	protein_coding	99.648	-3.19001	0.381565	-8.36035	6.25343e-17	2.52001e-14
chr8	138496261	138501261	ENSG00000147724.12	FAM135B	-	138497261	protein_coding	57.0083	-3.18945	0.478637	-6.66362	2.67164e-11	3.33505e-09
chr11	67285300	67290300	ENSG00000172932.16	ANKRD13D	+	67289300	protein_coding	4.64167	-3.18804	1.52954	-2.08432	0.0371312	0.159754
chr7	100851637	100856637	ENSG00000236305.3	SLC12A9-AS1	-	100852637	lncRNA	5.11419	-3.18378	1.56157	-2.03884	0.0414665	0.171062
chr4	11422874	11427874	ENSG00000287778.2	ENSG00000287778	+	11426874	lncRNA	35.0832	-3.18243	0.561965	-5.66304	1.48711e-08	9.49918e-07
chr21	41766089	41771089	ENSG00000183421.12	RIPK4	-	41767089	protein_coding	47.6507	-3.18134	0.470008	-6.7687	1.29944e-11	1.7455e-09
chr13	110336958	110341958	ENSG00000276765.1	MIR8073	+	110340958	miRNA	49.7552	-3.1797	0.506567	-6.27697	3.45238e-10	3.30087e-08
chrX	48318349	48323349	ENSG00000227302.1	SSXP9	+	48322349	unprocessed_pseudogene	26.2592	-3.17815	0.551946	-5.75809	8.50708e-09	5.81114e-07
chr12	132271391	132276391	ENSG00000256943.1	ENSG00000256943	+	132275391	lncRNA	35.4795	-3.17697	0.559329	-5.67998	1.34712e-08	8.78246e-07
chr11	115655168	115660168	ENSG00000279771.1	ENSG00000279771	+	115659168	TEC	111.281	-3.17628	0.413803	-7.67582	1.64366e-14	4.18187e-12
chr1	143494785	143499785	ENSG00000223495.2	ENSG00000223495	+	143498785	processed_pseudogene	68.2948	-3.17469	0.470718	-6.74437	1.53695e-11	2.04623e-09
chr16	1275522	1280522	ENSG00000261564.1	ENSG00000261564	-	1276522	unprocessed_pseudogene	69.1471	-3.17414	0.431164	-7.3618	1.81446e-13	3.60754e-11
chr2	2729957	2734957	ENSG00000227364.1	ENSG00000227364	-	2730957	lncRNA	88.2196	-3.17399	0.46268	-6.86001	6.88567e-12	9.89098e-10
chr7	130490033	130495033	ENSG00000272701.3	MESTIT1	-	130491033	lncRNA	52.7063	-3.17305	0.524075	-6.05457	1.4079e-09	1.16281e-07
chr3	186361234	186366234	ENSG00000058866.15	DGKG	-	186362234	protein_coding	125.257	-3.17181	0.379877	-8.34957	6.85123e-17	2.7425e-14
chr10	3292338	3297338	ENSG00000287428.1	ENSG00000287428	+	3296338	lncRNA	54.8751	-3.17179	0.507546	-6.24926	4.12408e-10	3.86916e-08
chr3	68631705	68636705	ENSG00000241506.1	PSMC1P1	+	68635705	processed_pseudogene	61.8876	-3.17169	0.508607	-6.23604	4.48789e-10	4.15209e-08
chrX	48408303	48413303	ENSG00000231603.1	ENSG00000231603	+	48412303	processed_pseudogene	42.6076	-3.17098	0.594768	-5.33146	9.7425e-08	5.15328e-06
chr10	49395089	49400089	ENSG00000165606.10	DRGX	-	49396089	protein_coding	105.964	-3.16849	0.377319	-8.39737	4.56584e-17	1.93064e-14
chr4	30716369	30721369	ENSG00000169851.16	PCDH7	+	30720369	protein_coding	40.0598	-3.16846	0.52587	-6.02517	1.68933e-09	1.37259e-07
chr14	105858553	105863553	ENSG00000264781.1	MIR4537	-	105859553	miRNA	51.4589	-3.16803	0.510614	-6.20436	5.49205e-10	4.95887e-08
chr2	181679827	181684827	ENSG00000162992.5	NEUROD1	-	181680827	protein_coding	40.1057	-3.16781	0.489275	-6.4745	9.51251e-11	1.04802e-08
chrX	13570746	13575746	ENSG00000233357.2	RPL30P15	+	13574746	processed_pseudogene	49.769	-3.16769	0.47504	-6.66825	2.58872e-11	3.25183e-09
chrX	135853538	135858538	ENSG00000278085.5	CT45A8	-	135854538	protein_coding	48.8605	-3.16509	0.436544	-7.25033	4.15752e-13	7.70476e-11
chr14	61321838	61326838	ENSG00000247287.3	PRKCH-AS1	-	61322838	lncRNA	74.6144	-3.16019	0.482338	-6.55181	5.68448e-11	6.64044e-09
chr20	59573509	59578509	ENSG00000087495.17	PHACTR3	+	59577509	protein_coding	39.6961	-3.15933	0.557747	-5.66445	1.47496e-08	9.43155e-07
chr11	90027106	90032106	ENSG00000204449.3	TRIM49C	+	90031106	protein_coding	75.5711	-3.15889	0.501599	-6.29764	3.0222e-10	2.94109e-08
chr3	14810414	14815414	ENSG00000260902.1	LINC02011	-	14811414	lncRNA	121.512	-3.15666	0.387115	-8.15431	3.51167e-16	1.23307e-13
chr2	2695442	2700442	ENSG00000234929.3	ENSG00000234929	-	2696442	lncRNA	97.3109	-3.155	0.482924	-6.53312	6.44127e-11	7.42341e-09
chr19	50567435	50572435	ENSG00000131409.13	LRRC4B	-	50568435	protein_coding	51.8096	-3.154	0.535116	-5.89405	3.76853e-09	2.80741e-07
chr16	49280838	49285838	ENSG00000102924.12	CBLN1	-	49281838	protein_coding	55.7315	-3.15384	0.482911	-6.53089	6.53792e-11	7.52036e-09
chr16	999926	1004926	ENSG00000260496.3	ENSG00000260496	-	1000926	lncRNA	65.7418	-3.15245	0.496318	-6.35168	2.1298e-10	2.17116e-08
chr4	4225929	4230929	ENSG00000163982.6	OTOP1	-	4226929	protein_coding	82.7025	-3.15064	0.472529	-6.66761	2.59997e-11	3.25914e-09
chrX	145764095	145769095	ENSG00000270709.1	UFM1P1	+	145768095	processed_pseudogene	26.358	-3.14773	0.648463	-4.85414	1.2091e-06	4.70506e-05
chr5	40407211	40412211	ENSG00000283286.2	ENSG00000283286	+	40411211	lncRNA	22.2462	-3.14318	0.807776	-3.89116	9.97664e-05	0.00207495
chr1	1165005	1170005	ENSG00000198976.1	MIR429	+	1169005	miRNA	65.4767	-3.14113	0.469011	-6.69734	2.12252e-11	2.74665e-09
chr4	9359129	9364129	ENSG00000228856.3	USP17L30	+	9363129	protein_coding	351.123	-3.14006	0.342404	-9.17065	4.70173e-20	3.96167e-17
chr8	52935182	52940182	ENSG00000288611.1	NPBWR1	+	52939182	protein_coding	46.0903	-3.13578	0.539057	-5.81715	5.98611e-09	4.25361e-07
chr11	131580145	131585145	ENSG00000285980.2	ENSG00000285980	-	131581145	lncRNA	95.2892	-3.1307	0.414361	-7.55549	4.17295e-14	9.49094e-12
chr2	181679113	181684113	ENSG00000234595.1	ENSG00000234595	+	181683113	lncRNA	44.4977	-3.12905	0.496328	-6.3044	2.89311e-10	2.82922e-08
chr20	40713257	40718257	ENSG00000286972.1	ENSG00000286972	+	40717257	lncRNA	74.4598	-3.12861	0.514505	-6.08082	1.19572e-09	1.00134e-07
chr6	204519	209519	ENSG00000263667.4	ENSG00000263667	-	205519	lncRNA	73.2823	-3.12763	0.487769	-6.4121	1.43525e-10	1.50398e-08
chr4	7456028	7461028	ENSG00000266690.1	MIR4274	+	7460028	miRNA	23.5833	-3.12641	0.736399	-4.24554	2.18069e-05	0.000566094
chrX	151973680	151978680	ENSG00000102287.19	GABRE	-	151974680	protein_coding	57.5561	-3.12486	0.457736	-6.82678	8.68392e-12	1.20978e-09
chr16	19183060	19188060	ENSG00000286790.1	ENSG00000286790	-	19184060	lncRNA	20.9637	-3.12328	0.757062	-4.12553	3.6988e-05	0.000894445
chr9	130938286	130943286	ENSG00000130720.13	FIBCD1	-	130939286	protein_coding	65.4223	-3.12156	0.447683	-6.9727	3.10908e-12	4.77446e-10
chr10	124449035	124454035	ENSG00000229544.9	NKX1-2	-	124450035	protein_coding	36.4795	-3.12111	0.519036	-6.01328	1.81807e-09	1.46529e-07
chr2	91836601	91841601	ENSG00000214330.4	ABCD1P5	+	91840601	unprocessed_pseudogene	56.374	-3.12061	0.459601	-6.78982	1.12272e-11	1.52863e-09
chr4	825129	830129	ENSG00000168993.15	CPLX1	-	826129	protein_coding	32.0051	-3.11957	0.589781	-5.28938	1.22733e-07	6.24987e-06
chr10	5977187	5982187	ENSG00000134470.21	IL15RA	-	5978187	protein_coding	33.6182	-3.11889	0.571678	-5.45569	4.87838e-08	2.76598e-06
chr14	104575764	104580764	ENSG00000184601.11	C14orf180	+	104579764	protein_coding	40.2072	-3.11883	0.532492	-5.85704	4.71201e-09	3.417e-07
chrX	66433345	66438345	ENSG00000226820.2	ENSG00000226820	+	66437345	unprocessed_pseudogene	24.9969	-3.11737	0.738057	-4.22375	2.40275e-05	0.000615852
chrX	145819632	145824632	ENSG00000286085.1	ENSG00000286085	-	145820632	lncRNA	22.6685	-3.11281	0.610887	-5.09556	3.4771e-07	1.57569e-05
chrX	93672578	93677578	ENSG00000186310.10	NAP1L3	-	93673578	protein_coding	18.4428	-3.11213	0.695713	-4.4733	7.70218e-06	0.000232397
chr14	106202603	106207603	ENSG00000271201.1	ENSG00000271201	+	106206603	lncRNA	77.1511	-3.11143	0.423586	-7.34545	2.05071e-13	4.02395e-11
chr3	134795493	134800493	ENSG00000286982.1	ENSG00000286982	-	134796493	lncRNA	82.8261	-3.10898	0.417406	-7.44835	9.45174e-14	1.99831e-11
chr2	130274444	130279444	ENSG00000284171.1	ENSG00000284171	+	130278444	unprocessed_pseudogene	54.0568	-3.10489	0.481856	-6.44361	1.16663e-10	1.24741e-08
chr22	48137542	48142542	ENSG00000229275.1	ENSG00000229275	+	48141542	lncRNA	71.8228	-3.10422	0.506574	-6.12788	8.90553e-10	7.67179e-08
chr6	159236786	159241786	ENSG00000235086.1	FNDC1-IT1	+	159240786	lncRNA	53.707	-3.10083	0.492926	-6.29065	3.16147e-10	3.0568e-08
chrX	152697700	152702700	ENSG00000287394.1	ENSG00000287394	-	152698700	lncRNA	19.9747	-3.10054	0.659767	-4.69944	2.60872e-06	9.11745e-05
chr20	24501345	24506345	ENSG00000228539.1	ENSG00000228539	-	24502345	lncRNA	61.334	-3.09985	0.552971	-5.60581	2.07279e-08	1.2765e-06
chr4	572452	577452	ENSG00000283183.4	ENSG00000283183	+	576452	lncRNA	80.5269	-3.09635	0.432204	-7.1641	7.83009e-13	1.39098e-10
chr18	11148569	11153569	ENSG00000154864.14	PIEZO2	-	11149569	protein_coding	73.557	-3.09594	0.483582	-6.4021	1.53259e-10	1.59762e-08
chr3	68000247	68005247	ENSG00000183662.12	TAFA1	+	68004247	protein_coding	55.3843	-3.09519	0.486629	-6.36047	2.01139e-10	2.07512e-08
chr9	134774671	134779671	ENSG00000286502.1	ENSG00000286502	-	134775671	lncRNA	30.3574	-3.0941	0.552565	-5.59952	2.14945e-08	1.31427e-06
chr1	37633892	37638892	ENSG00000169218.14	RSPO1	-	37634892	protein_coding	134.787	-3.09357	0.367162	-8.42563	3.58824e-17	1.60785e-14
chr12	54545601	54550601	ENSG00000123360.12	PDE1B	+	54549601	protein_coding	80.9427	-3.0933	0.458536	-6.74603	1.51941e-11	2.02737e-09
chr4	73865393	73870393	ENSG00000163739.5	CXCL1	+	73869393	protein_coding	58.1076	-3.09179	0.470403	-6.57263	4.94347e-11	5.85561e-09
chr6	50856662	50861662	ENSG00000060303.5	RPS17P5	-	50857662	processed_pseudogene	37.6094	-3.09174	0.574408	-5.38248	7.34656e-08	4.03953e-06
chr17	48624675	48629675	ENSG00000242207.1	HOXB-AS4	+	48628675	lncRNA	57.5337	-3.09144	0.432893	-7.14134	9.24227e-13	1.59466e-10
chr19	4275266	4280266	ENSG00000105251.11	SHD	+	4279266	protein_coding	37.8179	-3.08969	0.492619	-6.27197	3.56499e-10	3.39233e-08
chr1	1178555	1183555	ENSG00000205231.1	TTLL10-AS1	-	1179555	lncRNA	24.0396	-3.08955	0.722352	-4.27706	1.89376e-05	0.000502026
chr16	1287837	1292837	ENSG00000260284.1	TPSP2	-	1288837	unprocessed_pseudogene	105.43	-3.08718	0.441724	-6.98893	2.76983e-12	4.29029e-10
chr20	46900726	46905726	ENSG00000236028.1	ENSG00000236028	-	46901726	lncRNA	34.0095	-3.08414	0.61619	-5.00518	5.58102e-07	2.39876e-05
chr4	74361145	74366145	ENSG00000124882.4	EREG	+	74365145	protein_coding	59.4543	-3.08238	0.46546	-6.62221	3.53864e-11	4.30109e-09
chr2	103870236	103875236	ENSG00000256637.9	LINC01965	+	103874236	lncRNA	49.2571	-3.08054	0.545988	-5.64214	1.67949e-08	1.05817e-06
chrX	71759349	71764349	ENSG00000215113.7	CXorf49B	+	71763349	protein_coding	42.5576	-3.07984	0.531883	-5.79045	7.01988e-09	4.91261e-07
chr4	9216152	9221152	ENSG00000227551.1	USP17L12	+	9220152	protein_coding	368.052	-3.07912	0.328141	-9.38353	6.37986e-21	7.66145e-18
chr10	1522637	1527637	ENSG00000205696.5	ADARB2-AS1	+	1526637	lncRNA	81.4894	-3.07899	0.419843	-7.33368	2.2392e-13	4.3795e-11
chr9	137170984	137175984	ENSG00000261793.1	ENSG00000261793	-	137171984	protein_coding	16.7461	-3.07754	0.780077	-3.94518	7.97417e-05	0.00172088
chr12	127910707	127915707	ENSG00000256193.6	LINC00507	+	127914707	lncRNA	49.1485	-3.07592	0.518017	-5.93789	2.88717e-09	2.21119e-07
chr2	12276581	12281581	ENSG00000290030.1	ENSG00000290030	-	12277581	lncRNA	62.9011	-3.07467	0.471995	-6.51421	7.30742e-11	8.28382e-09
chrX	26143774	26148774	ENSG00000232446.1	ENSG00000232446	+	26147774	unprocessed_pseudogene	14.4304	-3.07274	0.747455	-4.11094	3.94057e-05	0.00094454
chr4	9211405	9216405	ENSG00000233136.3	USP17L11	+	9215405	protein_coding	219.282	-3.072	0.359753	-8.53919	1.35165e-17	6.54505e-15
chrX	135870812	135875812	ENSG00000270946.6	CT45A9	-	135871812	protein_coding	51.1235	-3.0705	0.503155	-6.1025	1.04424e-09	8.8685e-08
chr11	90023511	90028511	ENSG00000255184.1	ENSG00000255184	-	90024511	unprocessed_pseudogene	53.0478	-3.06956	0.559736	-5.48395	4.15931e-08	2.39446e-06
chrX	145793375	145798375	ENSG00000279585.1	ENSG00000279585	+	145797375	TEC	23.4255	-3.0684	0.595502	-5.15263	2.56858e-07	1.20585e-05
chr4	8870839	8875839	ENSG00000215612.8	HMX1	-	8871839	protein_coding	72.574	-3.06745	0.436902	-7.02091	2.20425e-12	3.52938e-10
chr15	97349497	97354497	ENSG00000242863.3	RN7SL677P	+	97353497	misc_RNA	57.1274	-3.06743	0.460842	-6.65614	2.81109e-11	3.4946e-09
chr1	231158058	231163058	ENSG00000119283.16	TRIM67	+	231162058	protein_coding	42.964	-3.06707	0.479683	-6.39394	1.61662e-10	1.67359e-08
chr19	51629401	51634401	ENSG00000268500.7	SIGLEC5	-	51630401	protein_coding	16.9258	-3.06652	0.743189	-4.12617	3.68858e-05	0.000892692
chr4	31993376	31998376	ENSG00000251129.3	LINC02506	+	31997376	lncRNA	14.8188	-3.06565	0.816327	-3.75541	0.000173055	0.00327685
chrX	69500326	69505326	ENSG00000130054.5	NALF2	+	69504326	protein_coding	13.6193	-3.0643	0.794922	-3.85485	0.0001158	0.00234271
chr13	106941561	106946561	ENSG00000279157.1	ENSG00000279157	-	106942561	TEC	22.6108	-3.0624	0.637573	-4.80321	1.56141e-06	5.87058e-05
chr16	78886231	78891231	ENSG00000280190.1	ENSG00000280190	+	78890231	TEC	12.9915	-3.06001	1.09165	-2.8031	0.00506146	0.0439304
chr8	72074584	72079584	ENSG00000104321.11	TRPA1	-	72075584	protein_coding	59.2374	-3.05974	0.473005	-6.46873	9.88305e-11	1.07894e-08
chr2	5722253	5727253	ENSG00000236106.3	ENSG00000236106	+	5726253	lncRNA	41.2742	-3.05929	0.511142	-5.98521	2.16108e-09	1.70513e-07
chr8	2199320	2204320	ENSG00000288782.1	ENSG00000288782	+	2203320	lncRNA	91.1097	-3.05842	0.41135	-7.43507	1.0451e-13	2.20182e-11
chr13	112052845	112057845	ENSG00000224243.2	SOX1-OT	+	112056845	lncRNA	97.5983	-3.05802	0.469851	-6.50849	7.59081e-11	8.55126e-09
chr17	73162359	73167359	ENSG00000265469.1	POLR3KP2	-	73163359	processed_pseudogene	100.233	-3.05588	0.377944	-8.08556	6.1881e-16	2.03037e-13
chr16	1219639	1224639	ENSG00000277010.1	ENSG00000277010	+	1223639	lncRNA	50.0161	-3.05218	0.533403	-5.72208	1.05229e-08	7.00482e-07
chr8	141506230	141511230	ENSG00000226807.7	MROH5	-	141507230	protein_coding	70.4822	-3.05086	0.42663	-7.15106	8.61096e-13	1.50301e-10
chr1	1163863	1168863	ENSG00000207607.3	MIR200A	+	1167863	miRNA	36.8951	-3.05034	0.6355	-4.7999	1.58741e-06	5.92857e-05
chr21	39741183	39746183	ENSG00000183067.6	IGSF5	+	39745183	protein_coding	51.7524	-3.04951	0.474757	-6.4233	1.33348e-10	1.40469e-08
chr8	56112982	56117982	ENSG00000172680.1	MOS	-	56113982	protein_coding	78.1157	-3.04848	0.431162	-7.07037	1.54519e-12	2.53496e-10
chr4	9230385	9235385	ENSG00000223569.8	USP17L15	+	9234385	protein_coding	360.413	-3.04676	0.325338	-9.36491	7.61138e-21	8.62298e-18
chr2	132006195	132011195	ENSG00000287414.1	ENSG00000287414	+	132010195	lncRNA	38.7989	-3.04675	0.588848	-5.17408	2.29042e-07	1.08964e-05
chr6	84763598	84768598	ENSG00000112837.17	TBX18	-	84764598	protein_coding	38.4526	-3.04609	0.553457	-5.50375	3.71801e-08	2.16953e-06
chr16	31700728	31705728	ENSG00000276867.1	ENSG00000276867	+	31704728	lncRNA	3.74675	-3.04558	1.67532	-1.81791	0.0690775	NA
chrX	92113461	92118461	ENSG00000229132.2	EIF4A1P10	-	92114461	processed_pseudogene	4.50128	-3.04465	1.52849	-1.99194	0.0463782	0.183371
chr21	38498445	38503445	ENSG00000231480.1	SNRPGP13	+	38502445	processed_pseudogene	50.8699	-3.04128	0.493747	-6.15959	7.29346e-10	6.42124e-08
chr10	126387477	126392477	ENSG00000148848.15	ADAM12	-	126388477	protein_coding	71.7156	-3.03972	0.400378	-7.59215	3.14651e-14	7.38005e-12
chr11	1219066	1224066	ENSG00000117983.17	MUC5B	+	1223066	protein_coding	49.6899	-3.03895	0.512589	-5.92863	3.05465e-09	2.32758e-07
chr11	89988559	89993559	ENSG00000237706.4	TRIM51EP	-	89989559	unprocessed_pseudogene	95.6689	-3.03885	0.405285	-7.49807	6.47651e-14	1.41309e-11
chr20	63234779	63239779	ENSG00000266463.1	MIR3196	+	63238779	miRNA	32.101	-3.03844	0.583775	-5.20482	1.94187e-07	9.41824e-06
chr12	89704959	89709959	ENSG00000271614.1	ATP2B1-AS1	+	89708959	lncRNA	5.52516	-3.03802	1.48405	-2.04712	0.0406466	0.168813
chr16	86706122	86711122	ENSG00000261175.6	LINC02188	+	86710122	lncRNA	38.3658	-3.0375	0.567351	-5.35384	8.61089e-08	4.62048e-06
chr16	7003112	7008112	ENSG00000212189.1	RNU6-328P	-	7004112	snRNA	20.2681	-3.03525	0.728267	-4.16777	3.07598e-05	0.000762568
chr12	125296936	125301936	ENSG00000279462.1	ENSG00000279462	+	125300936	TEC	99.8971	-3.0346	0.402709	-7.53547	4.86572e-14	1.09014e-11
chr9	137171056	137176056	ENSG00000185863.8	TMEM210	-	137172056	protein_coding	16.1162	-3.03454	0.787674	-3.85253	0.000116902	0.00236258
chr5	129460076	129465076	ENSG00000249421.2	ADAMTS19-AS1	-	129461076	lncRNA	57.0989	-3.03398	0.495606	-6.12175	9.25523e-10	7.93887e-08
chr15	97211812	97216812	ENSG00000259485.2	LINC02253	+	97215812	lncRNA	39.9365	-3.0321	0.655837	-4.62325	3.7777e-06	0.000125597
chr7	155456099	155461099	ENSG00000236544.1	EN2-DT	-	155457099	lncRNA	5.74558	-3.03139	1.44226	-2.10183	0.0355684	0.155469
chr3	189825922	189830922	ENSG00000216058.1	MIR944	+	189829922	miRNA	40.1213	-3.03114	0.563173	-5.38225	7.35591e-08	4.04097e-06
chr11	49838320	49843320	ENSG00000219061.4	TRIM51FP	-	49839320	unprocessed_pseudogene	57.7209	-3.03075	0.569565	-5.32116	1.03108e-07	5.39287e-06
chr11	70858790	70863790	ENSG00000171671.6	SHANK2-AS3	+	70862790	lncRNA	49.7561	-3.03072	0.485578	-6.24146	4.33499e-10	4.02926e-08
chr16	27062927	27067927	ENSG00000234186.5	C16orf82	+	27066927	protein_coding	65.0239	-3.03058	0.484599	-6.25378	4.00631e-10	3.77637e-08
chr4	141632583	141637583	ENSG00000164136.17	IL15	+	141636583	protein_coding	64.9662	-3.02945	0.462004	-6.5572	5.4828e-11	6.44245e-09
chr5	129456281	129461281	ENSG00000145808.10	ADAMTS19	+	129460281	protein_coding	49.963	-3.02934	0.501725	-6.03785	1.56177e-09	1.27933e-07
chr8	7551062	7556062	ENSG00000248944.1	FAM90A6P	-	7552062	unprocessed_pseudogene	63.098	-3.02926	0.465031	-6.51411	7.31201e-11	8.28382e-09
chrX	125327021	125332021	ENSG00000213489.3	FBLIM1P1	-	125328021	processed_pseudogene	7.13426	-3.02906	1.19896	-2.5264	0.0115238	0.0756706
chr10	128959062	128964062	ENSG00000232985.1	ENSG00000232985	-	128960062	lncRNA	118.645	-3.02805	0.436227	-6.94145	3.88095e-12	5.85497e-10
chr1	6179321	6184321	ENSG00000116254.18	CHD5	-	6180321	protein_coding	27.1789	-3.02761	0.584886	-5.17641	2.26199e-07	1.07793e-05
chr12	52305287	52310287	ENSG00000287051.1	ENSG00000287051	-	52306287	lncRNA	45.3326	-3.02591	0.523181	-5.78367	7.30883e-09	5.08518e-07
chr1	13888792	13893792	ENSG00000189337.17	KAZN	+	13892792	protein_coding	123.753	-3.02333	0.403235	-7.49769	6.49546e-14	1.41309e-11
chr2	94896990	94901990	ENSG00000232128.1	MTCO3P45	+	94900990	processed_pseudogene	54.5729	-3.02292	0.531109	-5.69172	1.25768e-08	8.25315e-07
chr4	9258872	9263872	ENSG00000249811.3	USP17L21	+	9262872	protein_coding	352.4	-3.02071	0.324634	-9.30499	1.34008e-20	1.41164e-17
chr9	134548738	134553738	ENSG00000227150.1	ENSG00000227150	+	134552738	lncRNA	25.3682	-3.02014	0.707828	-4.26676	1.98331e-05	0.000522078
chr2	130274757	130279757	ENSG00000230548.1	MTND4P27	+	130278757	unprocessed_pseudogene	54.4285	-3.01747	0.483069	-6.24647	4.19841e-10	3.92663e-08
chr2	90359032	90364032	ENSG00000265897.2	ENSG00000265897	-	90360032	processed_pseudogene	77.5308	-3.01706	0.384344	-7.84987	4.16455e-15	1.21387e-12
chrX	145232619	145237619	ENSG00000234712.1	ENSG00000234712	-	145233619	lncRNA	13.09	-3.01618	0.799186	-3.77406	0.00016061	0.00307809
chr6	77462491	77467491	ENSG00000135312.7	HTR1B	-	77463491	protein_coding	140.398	-3.01462	0.419026	-7.19436	6.27549e-13	1.12816e-10
chr1	1073306	1078306	ENSG00000237330.3	RNF223	-	1074306	protein_coding	53.9293	-3.01423	0.450245	-6.69465	2.1619e-11	2.7916e-09
chr17	80032632	80037632	ENSG00000141519.15	CCDC40	+	80036632	protein_coding	7.80295	-3.01338	1.41942	-2.12296	0.0337569	0.150319
chr19	53978307	53983307	ENSG00000284583.1	MIR935	+	53982307	miRNA	12.0076	-3.01307	1.08905	-2.7667	0.00566265	0.0473652
chr17	29444400	29449400	ENSG00000202205.1	RNU6-1034P	-	29445400	snRNA	4.99371	-3.01287	1.53813	-1.95879	0.0501374	0.192496
chr14	105903527	105908527	ENSG00000211923.1	IGHD3-10	-	105904527	IG_D_gene	54.269	-3.01281	0.514272	-5.8584	4.67334e-09	3.39717e-07
chr17	58514315	58519315	ENSG00000289147.2	ENSG00000289147	+	58518315	lncRNA	6.05467	-3.01087	1.52032	-1.98042	0.0476562	0.186578
chr1	233904931	233909931	ENSG00000287921.1	ENSG00000287921	-	233905931	lncRNA	57.3969	-3.00854	0.473611	-6.35235	2.12051e-10	2.16906e-08
chr7	155948030	155953030	ENSG00000204876.5	ENSG00000204876	+	155952030	lncRNA	72.336	-3.00756	0.523453	-5.74561	9.15902e-09	6.17221e-07
chr7	130492111	130497111	ENSG00000199043.1	MIR335	+	130496111	miRNA	57.0188	-3.00755	0.487207	-6.17305	6.69859e-10	5.94985e-08
chr14	104116503	104121503	ENSG00000283165.1	MIR203B	-	104117503	miRNA	70.6272	-3.007	0.436581	-6.88761	5.67363e-12	8.2486e-10
chr2	74144007	74149007	ENSG00000225439.4	BOLA3-DT	+	74148007	lncRNA	7.11162	-3.00694	1.376	-2.18527	0.0288692	0.136652
chr8	13532029	13537029	ENSG00000252179.1	RNA5SP255	+	13536029	rRNA_pseudogene	37.0474	-3.00683	0.540805	-5.55992	2.69903e-08	1.62223e-06
chrX	138478745	138483745	ENSG00000183981.8	MAGEA13P	+	138482745	processed_pseudogene	19.2394	-3.00469	0.689071	-4.36049	1.29769e-05	0.000365471
chr20	19211164	19216164	ENSG00000287430.1	ENSG00000287430	-	19212164	lncRNA	115.686	-3.00394	0.460521	-6.52291	6.89539e-11	7.88623e-09
chr7	155454129	155459129	ENSG00000164778.4	EN2	+	155458129	protein_coding	6.19844	-3.00346	1.4555	-2.06353	0.0390621	0.164569
chr2	129933340	129938340	ENSG00000214100.10	PLAC9P1	-	129934340	transcribed_unprocessed_pseudogene	86.4104	-3.00345	0.445923	-6.73536	1.63526e-11	2.16273e-09
chr12	74166445	74171445	ENSG00000258320.1	ENSG00000258320	+	74170445	processed_pseudogene	31.0331	-3.00178	0.715847	-4.19333	2.7489e-05	0.000691509
chr7	3301452	3306452	ENSG00000236708.1	SDK1-AS1	-	3302452	lncRNA	39.6064	-3.00088	0.584438	-5.13464	2.82684e-07	1.32089e-05
chr20	62649767	62654767	ENSG00000277496.1	SLCO4A1-AS2	-	62650767	lncRNA	5.41669	-3.00072	1.88893	-1.58858	0.112155	0.311378
chrX	145996274	146001274	ENSG00000216098.1	MIR892B	-	145997274	miRNA	13.0645	-3.00019	0.860647	-3.48597	0.000490363	0.00760614
chr22	20483105	20488105	ENSG00000236670.1	KRT18P5	-	20484105	processed_pseudogene	4.77823	-2.99976	1.57635	-1.90298	0.0570427	0.208223
chrX	102439008	102444008	ENSG00000269437.8	NXF2B	-	102440008	protein_coding	30.1039	-2.99894	0.616633	-4.86342	1.15376e-06	4.5131e-05
chr15	78340757	78345757	ENSG00000279694.1	ENSG00000279694	-	78341757	TEC	113.599	-2.99844	0.362559	-8.27021	1.33725e-16	5.14705e-14
chrX	146951075	146956075	ENSG00000225660.1	ENSG00000225660	+	146955075	processed_pseudogene	10.0401	-2.99759	0.972301	-3.08298	0.00204938	0.0231042
chr20	52968358	52973358	ENSG00000182463.16	TSHZ2	+	52972358	protein_coding	64.0976	-2.99682	0.501387	-5.97705	2.27217e-09	1.78018e-07
chrX	121863196	121868196	ENSG00000213498.3	TPT1P13	-	121864196	processed_pseudogene	24.5622	-2.99536	0.647637	-4.62505	3.74506e-06	0.000124581
chr6	125743664	125748664	ENSG00000135547.9	HEY2	+	125747664	protein_coding	67.7315	-2.9942	0.47176	-6.34688	2.19729e-10	2.22862e-08
chr7	6750103	6755103	ENSG00000169402.16	RSPH10B2	+	6754103	protein_coding	6.19245	-2.99386	1.51268	-1.97917	0.0477969	0.186904
chr9	130895812	130900812	ENSG00000188710.3	QRFP	-	130896812	protein_coding	80.5365	-2.99093	0.415519	-7.19807	6.10686e-13	1.10446e-10
chr10	132032336	132037336	ENSG00000188385.13	JAKMIP3	+	132036336	protein_coding	88.7057	-2.9899	0.410119	-7.29032	3.09216e-13	5.81533e-11
chr17	71007997	71012997	ENSG00000271101.1	ENSG00000271101	+	71011997	processed_pseudogene	39.8872	-2.98924	0.630645	-4.73997	2.13753e-06	7.65785e-05
chr16	2813180	2818180	ENSG00000007038.11	PRSS21	+	2817180	protein_coding	22.3974	-2.98629	0.719728	-4.1492	3.33643e-05	0.00081902
chr16	12841610	12846610	ENSG00000199474.1	ENSG00000199474	-	12842610	snoRNA	25.3163	-2.98409	0.67515	-4.4199	9.87482e-06	0.000288047
chr15	91098838	91103838	ENSG00000285661.1	ENSG00000285661	-	91099838	lncRNA	158.599	-2.9824	0.346356	-8.61078	7.25669e-18	3.66152e-15
chr5	6444859	6449859	ENSG00000215218.4	UBE2QL1	+	6448859	protein_coding	44.8935	-2.98229	0.480246	-6.20993	5.30091e-10	4.80797e-08
chr21	42365535	42370535	ENSG00000160182.3	TFF1	-	42366535	protein_coding	26.0629	-2.98063	0.719685	-4.14158	3.44921e-05	0.000841887
chrX	22234358	22239358	ENSG00000233067.4	PTCHD1-AS	-	22235358	lncRNA	31.0394	-2.98052	0.602364	-4.94804	7.49648e-07	3.07668e-05
chr22	18629984	18634984	ENSG00000286175.1	FAM246B	+	18633984	protein_coding	10.9464	-2.97977	0.922176	-3.23124	0.00123254	0.0156927
chr8	3405133	3410133	ENSG00000285861.1	ENSG00000285861	+	3409133	lncRNA	67.2983	-2.97511	0.476417	-6.24474	4.24493e-10	3.9578e-08
chr16	79210264	79215264	ENSG00000285918.1	ENSG00000285918	-	79211264	lncRNA	22.664	-2.97497	0.716567	-4.1517	3.30012e-05	0.000811435
chr2	27438366	27443366	ENSG00000157992.12	KRTCAP3	+	27442366	protein_coding	5.62109	-2.97453	1.88353	-1.57923	0.114283	0.314553
chr17	49830239	49835239	ENSG00000262837.1	ENSG00000262837	+	49834239	lncRNA	4.79935	-2.97438	1.8801	-1.58203	0.113642	0.313695
chrX	154424633	154429633	ENSG00000071553.18	ATP6AP1	+	154428633	protein_coding	3.77167	-2.97389	1.86903	-1.59113	0.111579	NA
chr22	26886548	26891548	ENSG00000231369.1	ENSG00000231369	-	26887548	processed_pseudogene	85.3792	-2.973	0.47274	-6.28886	3.19806e-10	3.0872e-08
chr14	105844677	105849677	ENSG00000211898.8	IGHD	-	105845677	IG_C_gene	84.0262	-2.97205	0.442389	-6.71817	1.84021e-11	2.39682e-09
chr2	184598008	184603008	ENSG00000283839.3	ENSG00000283839	-	184599008	lncRNA	30.4431	-2.96888	0.664516	-4.46774	7.90504e-06	0.000237563
chr15	96444842	96449842	ENSG00000259534.1	ENSG00000259534	+	96448842	lncRNA	58.6376	-2.96885	0.90227	-3.29043	0.00100035	0.013372
chr22	22915535	22920535	ENSG00000222037.5	IGLC6	+	22919535	IG_C_pseudogene	36.4155	-2.96782	0.552481	-5.37181	7.79502e-08	4.23187e-06
chr12	2456392	2461392	ENSG00000285734.1	ENSG00000285734	-	2457392	lncRNA	75.9356	-2.96592	0.501864	-5.9098	3.42522e-09	2.57724e-07
chr12	117967990	117972990	ENSG00000171435.14	KSR2	-	117968990	protein_coding	55.4136	-2.9644	0.492454	-6.01964	1.74801e-09	1.41072e-07
chrX	52718338	52723338	ENSG00000225397.1	ENSG00000225397	+	52722338	processed_pseudogene	16.4074	-2.95992	0.781741	-3.78632	0.000152895	0.00295001
chrX	52800529	52805529	ENSG00000229885.1	ENSG00000229885	-	52801529	processed_pseudogene	68.2273	-2.95955	0.472575	-6.26259	3.78634e-10	3.59158e-08
chr4	3572869	3577869	ENSG00000216560.4	LINC00955	+	3576869	lncRNA	72.1645	-2.95938	0.461904	-6.40692	1.48491e-10	1.55061e-08
chr21	41163801	41168801	ENSG00000182240.16	BACE2	+	41167801	protein_coding	48.6357	-2.95795	0.556327	-5.31692	1.05538e-07	5.49604e-06
chr7	137846092	137851092	ENSG00000157680.16	DGKI	-	137847092	protein_coding	95.0618	-2.95746	0.427856	-6.91228	4.76915e-12	7.03584e-10
chr11	70074433	70079433	ENSG00000254417.1	LINC02584	-	70075433	lncRNA	70.9588	-2.9571	0.429962	-6.87759	6.08739e-12	8.78633e-10
chr18	77245848	77250848	ENSG00000166573.6	GALR1	+	77249848	protein_coding	75.9461	-2.95675	0.443221	-6.67105	2.53973e-11	3.21043e-09
chr20	63377401	63382401	ENSG00000101204.18	CHRNA4	-	63378401	protein_coding	43.1777	-2.95483	0.465816	-6.34334	2.24837e-10	2.26893e-08
chr5	19037009	19042009	ENSG00000242654.1	RPL32P14	+	19041009	processed_pseudogene	11.972	-2.95383	0.842905	-3.50434	0.000457737	0.00719298
chrX	48410960	48415960	ENSG00000269791.6	SSX4B	-	48411960	protein_coding	28.3076	-2.95343	0.650022	-4.54358	5.53074e-06	0.00017405
chrX	15674012	15679012	ENSG00000147003.7	CLTRN	-	15675012	protein_coding	3.60208	-2.95288	1.61556	-1.82778	0.0675831	NA
chr11	124203183	124208183	ENSG00000239426.4	OR8F1P	+	124207183	unprocessed_pseudogene	85.0386	-2.95189	0.474523	-6.22075	4.94776e-10	4.52181e-08
chr13	109730700	109735700	ENSG00000285534.1	ENSG00000285534	-	109731700	lncRNA	22.1762	-2.9517	0.764537	-3.86077	0.00011303	0.00229983
chr8	41308473	41313473	ENSG00000104332.12	SFRP1	-	41309473	protein_coding	85.2706	-2.95084	0.418833	-7.04539	1.84942e-12	3.00125e-10
chr3	2097664	2102664	ENSG00000288831.2	ENSG00000288831	-	2098664	lncRNA	76.3438	-2.94901	0.44363	-6.64747	2.98175e-11	3.67631e-09
chr3	128997304	129002304	ENSG00000114654.8	EFCC1	+	129001304	protein_coding	60.2177	-2.94755	0.424474	-6.94401	3.81136e-12	5.76447e-10
chrX	21657330	21662330	ENSG00000185915.5	KLHL34	-	21658330	protein_coding	17.5279	-2.94495	0.840706	-3.50295	0.000460129	0.00722112
chr19	50556969	50561969	ENSG00000268231.1	ENSG00000268231	-	50557969	lncRNA	37.4342	-2.94492	0.537776	-5.47612	4.34754e-08	2.49204e-06
chr12	128290092	128295092	ENSG00000265635.1	MIR3612	+	128294092	miRNA	60.7778	-2.94401	0.478001	-6.15901	7.32022e-10	6.43536e-08
chr21	41163557	41168557	ENSG00000263681.1	MIR3197	+	41167557	miRNA	49.3599	-2.94389	0.549155	-5.36077	8.28686e-08	4.47059e-06
chr1	4650609	4655609	ENSG00000196581.11	AJAP1	+	4654609	protein_coding	31.1589	-2.9434	0.546983	-5.38115	7.40097e-08	4.04417e-06
chr3	54124377	54129377	ENSG00000286353.1	ENSG00000286353	-	54125377	lncRNA	61.3753	-2.94329	0.505138	-5.82671	5.65301e-09	4.03123e-07
chr11	69818416	69823416	ENSG00000186895.4	FGF3	-	69819416	protein_coding	76.027	-2.94265	0.476921	-6.1701	6.82477e-10	6.05297e-08
chr2	119157751	119162751	ENSG00000144119.4	C1QL2	-	119158751	protein_coding	98.5226	-2.93995	0.399985	-7.35015	1.97983e-13	3.89761e-11
chr3	48594329	48599329	ENSG00000114270.18	COL7A1	-	48595329	protein_coding	14.2722	-2.93918	0.753448	-3.90097	9.58067e-05	0.00200509
chr12	47078959	47083959	ENSG00000139211.7	AMIGO2	-	47079959	protein_coding	93.8951	-2.93898	0.44659	-6.58093	4.67508e-11	5.55862e-09
chr7	157739456	157744456	ENSG00000231515.1	ENSG00000231515	-	157740456	lncRNA	98.8822	-2.93839	0.405673	-7.24326	4.38029e-13	8.09262e-11
chr22	21360299	21365299	ENSG00000286102.1	FAM246A	-	21361299	protein_coding	18.43	-2.93628	0.736393	-3.98738	6.6808e-05	0.00148297
chr12	5031941	5036941	ENSG00000255996.1	ENSG00000255996	-	5032941	processed_pseudogene	38.4014	-2.93599	0.513762	-5.7147	1.099e-08	7.28347e-07
chr7	157864538	157869538	ENSG00000272839.1	ENSG00000272839	+	157868538	lncRNA	62.5275	-2.93523	0.500471	-5.86494	4.49299e-09	3.28596e-07
chr20	63215139	63220139	ENSG00000149658.18	YTHDF1	-	63216139	protein_coding	14.4867	-2.93385	0.825933	-3.55217	0.000382072	0.0062265
chr2	287851	292851	ENSG00000189292.16	ALKAL2	-	288851	protein_coding	62.0274	-2.93348	0.436072	-6.72705	1.73134e-11	2.26309e-09
chr2	68639579	68644579	ENSG00000169618.7	PROKR1	+	68643579	protein_coding	68.9942	-2.93155	0.450648	-6.50519	7.75943e-11	8.72486e-09
chr11	104163379	104168379	ENSG00000170962.13	PDGFD	-	104164379	protein_coding	47.2955	-2.93047	0.488808	-5.99513	2.03321e-09	1.61058e-07
chr12	52307371	52312371	ENSG00000257829.1	ENSG00000257829	-	52308371	lncRNA	56.5662	-2.92954	0.477422	-6.13618	8.45319e-10	7.34535e-08
chr11	89921245	89926245	ENSG00000223417.9	TRIM49D1	-	89922245	protein_coding	49.6036	-2.92923	0.492252	-5.95068	2.67037e-09	2.06357e-07
chr16	28062714	28067714	ENSG00000169181.13	GSG1L	-	28063714	protein_coding	83.6244	-2.92901	0.466742	-6.27543	3.4866e-10	3.32829e-08
chr16	26357355	26362355	ENSG00000228480.1	ENSG00000228480	-	26358355	unprocessed_pseudogene	44.0769	-2.92887	0.629691	-4.65127	3.29891e-06	0.00011172
chr20	63214041	63219041	ENSG00000273821.1	ENSG00000273821	+	63218041	lncRNA	5.22722	-2.92829	1.86487	-1.57024	0.11636	0.317736
chr14	105903711	105908711	ENSG00000211924.1	IGHD3-9	-	105904711	IG_D_gene	55.3567	-2.92795	0.506648	-5.77906	7.51175e-09	5.19028e-07
chr4	756740	761740	ENSG00000272588.1	ENSG00000272588	-	757740	lncRNA	3.97458	-2.92746	1.87402	-1.56213	0.118258	NA
chr11	35134882	35139882	ENSG00000026508.21	CD44	+	35138882	protein_coding	82.3952	-2.92608	0.372241	-7.86072	3.81929e-15	1.12968e-12
chr5	76079383	76084383	ENSG00000122012.14	SV2C	+	76083383	protein_coding	116.447	-2.92608	0.413231	-7.08097	1.43152e-12	2.36789e-10
chr12	132328005	132333005	ENSG00000279113.1	ENSG00000279113	+	132332005	TEC	115.057	-2.92304	0.357355	-8.17966	2.8464e-16	1.0113e-13
chr4	9254124	9259124	ENSG00000250745.3	USP17L20	+	9258124	protein_coding	332.93	-2.92174	0.337827	-8.64863	5.21227e-18	2.76961e-15
chr14	105890207	105895207	ENSG00000237020.1	IGHD1-20	-	105891207	IG_D_gene	45.5812	-2.92086	0.500583	-5.83491	5.38211e-09	3.86097e-07
chr6	19838080	19843080	ENSG00000228412.9	LNC-LBCS	-	19839080	lncRNA	72.5212	-2.92083	0.461205	-6.33304	2.40375e-10	2.40465e-08
chr9	135443446	135448446	ENSG00000224682.1	SOCS5P2	+	135447446	processed_pseudogene	45.0669	-2.92034	0.606361	-4.81617	1.46342e-06	5.55787e-05
chr18	5563130	5568130	ENSG00000264000.1	ENSG00000264000	+	5567130	lncRNA	49.7782	-2.91808	0.500061	-5.83544	5.3649e-09	3.85323e-07
chr1	18105389	18110389	ENSG00000280222.1	ENSG00000280222	+	18109389	TEC	61.569	-2.91579	0.447362	-6.51774	7.13724e-11	8.11645e-09
chr4	4149421	4154421	ENSG00000250381.1	UNC93B4	-	4150421	unprocessed_pseudogene	87.6702	-2.91328	0.393002	-7.41288	1.23584e-13	2.54125e-11
chr8	7291014	7296014	ENSG00000233295.3	FAM90A20P	+	7295014	protein_coding	59.4858	-2.91209	0.445978	-6.52969	6.59081e-11	7.55227e-09
chr5	175654030	175659030	ENSG00000113749.8	HRH2	+	175658030	protein_coding	74.5807	-2.91182	0.451665	-6.44685	1.14199e-10	1.22885e-08
chr8	273351	278351	ENSG00000288985.2	ENSG00000288985	-	274351	lncRNA	58.201	-2.91158	0.467195	-6.23205	4.60376e-10	4.2397e-08
chr18	13215367	13220367	ENSG00000267239.1	ENSG00000267239	-	13216367	lncRNA	56.003	-2.91115	0.435652	-6.68228	2.35258e-11	3.01191e-09
chr4	73832640	73837640	ENSG00000124875.10	CXCL6	+	73836640	protein_coding	41.1523	-2.91062	0.535309	-5.43726	5.41052e-08	3.04185e-06
chr8	7581653	7586653	ENSG00000285765.1	FAM90A23	-	7582653	protein_coding	106.524	-2.90882	0.385302	-7.54944	4.37148e-14	9.90495e-12
chr11	89807575	89812575	ENSG00000168930.13	TRIM49	-	89808575	protein_coding	58.6097	-2.90875	0.466323	-6.23763	4.44251e-10	4.11645e-08
chr21	44502807	44507807	ENSG00000235890.2	TSPEAR-AS1	+	44506807	lncRNA	30.0086	-2.90799	0.612668	-4.74644	2.07032e-06	7.45266e-05
chr11	89962037	89967037	ENSG00000204450.9	TRIM64	+	89966037	protein_coding	39.9401	-2.90637	0.511923	-5.67737	1.36783e-08	8.87891e-07
chr5	66618868	66623868	ENSG00000248803.1	ENSG00000248803	+	66622868	processed_pseudogene	35.3112	-2.90616	0.522847	-5.55834	2.72359e-08	1.63535e-06
chr4	74793523	74798523	ENSG00000174808.12	BTC	-	74794523	protein_coding	64.0892	-2.90335	0.423866	-6.84968	7.40146e-12	1.05311e-09
chr1	13509220	13514220	ENSG00000259961.1	ENSG00000259961	+	13513220	lncRNA	67.1344	-2.90229	0.451046	-6.43457	1.23827e-10	1.31362e-08
chr10	99234862	99239862	ENSG00000172987.13	HPSE2	-	99235862	protein_coding	81.4463	-2.90206	0.478762	-6.06159	1.34784e-09	1.11936e-07
chr14	105906241	105911241	ENSG00000211925.1	IGHD2-8	-	105907241	IG_D_gene	59.3338	-2.90106	0.524663	-5.52939	3.21352e-08	1.89727e-06
chr19	9083061	9088061	ENSG00000170929.6	OR1M1	+	9087061	protein_coding	49.2869	-2.90094	0.511441	-5.67208	1.41076e-08	9.08879e-07
chr1	11424821	11429821	ENSG00000224338.2	MTCYBP45	-	11425821	processed_pseudogene	54.6092	-2.90084	0.491269	-5.90478	3.53115e-09	2.6503e-07
chr5	17349910	17354910	ENSG00000248223.1	ENSG00000248223	+	17353910	lncRNA	44.3788	-2.90023	0.492159	-5.89289	3.79509e-09	2.8237e-07
chr6	37818218	37823218	ENSG00000225945.1	ZFAND3-DT	-	37819218	lncRNA	6.11052	-2.89926	1.39928	-2.07197	0.0382684	0.16269
chr15	74128341	74133341	ENSG00000248540.3	ENSG00000248540	-	74129341	lncRNA	101.197	-2.89914	0.433146	-6.69323	2.18302e-11	2.81282e-09
chr12	132273349	132278349	ENSG00000256542.2	ENSG00000256542	+	132277349	lncRNA	31.0522	-2.89756	0.564654	-5.13156	2.87348e-07	1.33956e-05
chr11	89864550	89869550	ENSG00000254558.1	ENSG00000254558	-	89865550	unprocessed_pseudogene	56.9964	-2.89471	0.511835	-5.65555	1.55348e-08	9.86015e-07
chr9	21398139	21403139	ENSG00000231195.1	IFNA11P	-	21399139	unprocessed_pseudogene	58.6345	-2.89469	0.502958	-5.75533	8.64713e-09	5.8934e-07
chr18	73263480	73268480	ENSG00000263711.6	LINC02864	-	73264480	lncRNA	38.5226	-2.89398	0.646606	-4.47565	7.61803e-06	0.000230321
chr1	107964180	107969180	ENSG00000134215.16	VAV3	-	107965180	protein_coding	50.9378	-2.89247	0.457912	-6.31665	2.67296e-10	2.64407e-08
chr16	85849902	85854902	ENSG00000289932.1	ENSG00000289932	+	85853902	lncRNA	29.4858	-2.89221	0.556379	-5.19827	2.01155e-07	9.71692e-06
chr21	38120360	38125360	ENSG00000184029.9	DSCR4	-	38121360	lncRNA	33.1936	-2.89082	0.602052	-4.8016	1.57402e-06	5.89584e-05
chr1	7013279	7018279	ENSG00000237365.1	ENSG00000237365	-	7014279	lncRNA	59.4621	-2.88984	0.483085	-5.98205	2.20346e-09	1.734e-07
chr12	131432447	131437447	ENSG00000280319.1	ENSG00000280319	+	131436447	TEC	62.8362	-2.88975	0.497586	-5.80754	6.33973e-09	4.49055e-07
chr16	63699483	63704483	ENSG00000259864.1	ENSG00000259864	+	63703483	processed_pseudogene	22.0456	-2.88969	0.721743	-4.00377	6.23422e-05	0.00139622
chr7	142791708	142796708	ENSG00000289416.1	ENSG00000289416	+	142795708	lncRNA	133.327	-2.8876	0.71009	-4.06652	4.77199e-05	0.00111707
chrX	119149579	119154579	ENSG00000250423.3	KIAA1210	-	119150579	protein_coding	45.3748	-2.88604	0.499475	-5.77814	7.5529e-09	5.20673e-07
chr11	1625775	1630775	ENSG00000185940.11	KRTAP5-5	+	1629775	protein_coding	48.6481	-2.88528	0.467748	-6.16844	6.89681e-10	6.10784e-08
chr2	95450500	95455500	ENSG00000204705.3	UBTFL5	-	95451500	unprocessed_pseudogene	81.0249	-2.88407	0.446127	-6.46469	1.0151e-10	1.10618e-08
chr8	7566360	7571360	ENSG00000234749.5	FAM90A21P	-	7567360	unprocessed_pseudogene	85.1619	-2.88396	0.42051	-6.85824	6.97133e-12	9.99013e-10
chr15	88797734	88802734	ENSG00000259676.1	ENSG00000259676	-	88798734	lncRNA	205.606	-2.88395	0.383083	-7.52827	5.14156e-14	1.14341e-11
chr8	11919809	11924809	ENSG00000254948.1	OR7E158P	-	11920809	unprocessed_pseudogene	96.8623	-2.88314	0.388742	-7.41657	1.20192e-13	2.48856e-11
chrX	145813829	145818829	ENSG00000185985.11	SLITRK2	+	145817829	protein_coding	55.2502	-2.88248	0.422381	-6.82435	8.83251e-12	1.2248e-09
chr13	109100919	109105919	ENSG00000229938.1	MYO16-AS2	-	109101919	lncRNA	62.6574	-2.88058	0.511148	-5.63552	1.7453e-08	1.09504e-06
chr8	142246866	142251866	ENSG00000253602.2	RN7SL260P	-	142247866	misc_RNA	80.5749	-2.88013	0.393925	-7.31136	2.6445e-13	5.08931e-11
chr20	22342930	22347930	ENSG00000270838.1	ENSG00000270838	-	22343930	processed_pseudogene	33.4449	-2.87877	0.550162	-5.23258	1.67163e-07	8.26101e-06
chr1	2628568	2633568	ENSG00000237058.1	MMEL1-AS1	+	2632568	lncRNA	43.6859	-2.87849	0.495252	-5.81217	6.16669e-09	4.37674e-07
chrX	150564417	150569417	ENSG00000171100.16	MTM1	+	150568417	protein_coding	4.76981	-2.87817	1.41109	-2.03968	0.0413822	0.170879
chr21	44693172	44698172	ENSG00000189169.7	KRTAP10-12	+	44697172	protein_coding	65.0493	-2.87781	0.43906	-6.55447	5.58394e-11	6.54704e-09
chr19	41545518	41550518	ENSG00000007129.18	CEACAM21	+	41549518	protein_coding	97.3099	-2.87737	0.420495	-6.84282	7.7647e-12	1.097e-09
chr2	130273184	130278184	ENSG00000249997.1	MTCO3P7	+	130277184	unprocessed_pseudogene	57.3527	-2.87716	0.447682	-6.4268	1.30321e-10	1.37522e-08
chr12	130134693	130139693	ENSG00000276122.1	ENSG00000276122	+	130138693	lncRNA	54.0949	-2.87611	0.546728	-5.26059	1.43593e-07	7.20291e-06
chr11	129813690	129818690	ENSG00000287426.1	ENSG00000287426	-	129814690	lncRNA	62.578	-2.87387	0.44427	-6.46875	9.88198e-11	1.07894e-08
chr7	137842936	137847936	ENSG00000289438.1	ENSG00000289438	+	137846936	lncRNA	107.534	-2.8738	0.403445	-7.12316	1.05483e-12	1.80446e-10
chr19	56918018	56923018	ENSG00000269786.1	ENSG00000269786	+	56922018	processed_pseudogene	18.2155	-2.87341	0.831385	-3.45618	0.000547897	0.00832649
chr1	1163104	1168104	ENSG00000207730.3	MIR200B	+	1167104	miRNA	27.9344	-2.87306	0.641785	-4.47668	7.58143e-06	0.000229677
chr4	3676855	3681855	ENSG00000250632.1	LINC02171	-	3677855	lncRNA	68.2004	-2.87259	0.473081	-6.0721	1.26249e-09	1.05285e-07
chrX	120960487	120965487	ENSG00000226023.6	CT47A6	-	120961487	protein_coding	4.29837	-2.8721	1.37718	-2.0855	0.0370242	0.159521
chr9	138202325	138207325	ENSG00000237419.1	ENSG00000237419	-	138203325	lncRNA	56.7623	-2.8719	0.48984	-5.86294	4.54752e-09	3.32179e-07
chrX	12053926	12058926	ENSG00000206792.1	Y_RNA	-	12054926	misc_RNA	19.2107	-2.87168	0.718977	-3.99412	6.49351e-05	0.00144781
chrX	13730743	13735743	ENSG00000046651.16	OFD1	+	13734743	protein_coding	3.98477	-2.87149	1.37184	-2.09317	0.0363344	NA
chr16	6569767	6574767	ENSG00000260835.1	ENSG00000260835	+	6573767	lncRNA	28.0441	-2.86956	0.667064	-4.30178	1.69433e-05	0.000457233
chr11	89727017	89732017	ENSG00000255540.1	ENSG00000255540	+	89731017	processed_pseudogene	43.4407	-2.86917	0.505735	-5.67327	1.40093e-08	9.05463e-07
chr3	189968861	189973861	ENSG00000230077.1	MTAPP2	-	189969861	processed_pseudogene	40.6375	-2.86719	0.532664	-5.38273	7.33651e-08	4.0377e-06
chr5	38021568	38026568	ENSG00000248461.3	LINC02119	+	38025568	lncRNA	56.935	-2.86659	0.44202	-6.4852	8.86151e-11	9.79891e-09
chr18	7460135	7465135	ENSG00000286126.1	ENSG00000286126	-	7461135	lncRNA	63.0264	-2.86575	0.49828	-5.75129	8.85658e-09	6.00208e-07
chr21	41763164	41768164	ENSG00000289513.2	ENSG00000289513	+	41767164	lncRNA	16.8442	-2.86567	0.713521	-4.01624	5.91346e-05	0.00133735
chr14	105882922	105887922	ENSG00000211909.1	IGHD5-24	-	105883922	IG_D_gene	54.3138	-2.86504	0.470034	-6.09539	1.09174e-09	9.22355e-08
chr12	52572843	52577843	ENSG00000170484.10	KRT74	-	52573843	protein_coding	75.7128	-2.8648	0.385867	-7.4243	1.13375e-13	2.35554e-11
chrX	74765639	74770639	ENSG00000271589.1	ENSG00000271589	+	74769639	processed_pseudogene	20.6993	-2.86478	0.713669	-4.01415	5.96596e-05	0.00134669
chr6	73142514	73147514	ENSG00000229154.2	KCNQ5-AS1	-	73143514	lncRNA	52.0803	-2.86466	0.506209	-5.65905	1.52216e-08	9.68182e-07
chr17	38910979	38915979	ENSG00000277057.1	MIR6779	+	38914979	miRNA	6.01204	-2.86456	1.49369	-1.91777	0.0551399	0.203831
chr19	54765793	54770793	ENSG00000125498.20	KIR2DL1	+	54769793	protein_coding	52.7572	-2.86423	0.474515	-6.03611	1.57874e-09	1.28971e-07
chrX	53418690	53423690	ENSG00000158423.17	RIBC1	+	53422690	protein_coding	2.41193	-2.86414	1.99436	-1.43612	0.150968	NA
chr17	18006643	18011643	ENSG00000232344.2	ENSG00000232344	+	18010643	processed_pseudogene	5.00281	-2.86407	1.49614	-1.91431	0.0555806	0.204867
chr6	1308098	1313098	ENSG00000164379.7	FOXQ1	+	1312098	protein_coding	114.634	-2.86165	0.41532	-6.89022	5.57047e-12	8.11828e-10
chr13	19378454	19383454	ENSG00000231184.3	CCNQP3	+	19382454	processed_pseudogene	17.5836	-2.86126	0.834268	-3.42966	0.000604333	0.00901977
chr21	38120345	38125345	ENSG00000157542.11	KCNJ6	-	38121345	protein_coding	33.0641	-2.86093	0.603239	-4.74262	2.10974e-06	7.57637e-05
chr11	69925813	69930813	ENSG00000260679.1	ENSG00000260679	-	69926813	lncRNA	77.4027	-2.86081	0.418692	-6.83274	8.33107e-12	1.16876e-09
chr22	45976162	45981162	ENSG00000188064.10	WNT7B	-	45977162	protein_coding	19.6495	-2.86052	0.720449	-3.97046	7.17326e-05	0.00157309
chr6	125748190	125753190	ENSG00000237742.8	HEY2-AS1	-	125749190	lncRNA	52.5002	-2.85993	0.545676	-5.24108	1.59639e-07	7.94148e-06
chr14	101041920	101046920	ENSG00000199020.3	MIR381	+	101045920	miRNA	51.7567	-2.85991	0.517538	-5.52599	3.27638e-08	1.93059e-06
chr2	95621213	95626213	ENSG00000204699.4	UBTFL3	+	95625213	unprocessed_pseudogene	79.0265	-2.85876	0.464329	-6.15676	7.42497e-10	6.51791e-08
chr16	79077234	79082234	ENSG00000260694.1	ENSG00000260694	-	79078234	lncRNA	20.1825	-2.858	0.799357	-3.57537	0.00034973	0.00579608
chr7	31048308	31053308	ENSG00000078549.15	ADCYAP1R1	+	31052308	protein_coding	79.699	-2.85743	0.421585	-6.77783	1.21996e-11	1.64981e-09
chr13	91088593	91093593	ENSG00000234625.1	LINC00380	-	91089593	lncRNA	26.6444	-2.85591	0.713568	-4.00229	6.27314e-05	0.00140403
chr10	1292002	1297002	ENSG00000282390.1	ENSG00000282390	-	1293002	lncRNA	45.1955	-2.85553	0.504445	-5.66073	1.50733e-08	9.60788e-07
chr12	132278814	132283814	ENSG00000277011.1	ENSG00000277011	+	132282814	lncRNA	40.8621	-2.85516	0.552495	-5.16776	2.36914e-07	1.12187e-05
chr9	21399081	21404081	ENSG00000235108.1	IFNA12P	+	21403081	unprocessed_pseudogene	63.418	-2.85329	0.496407	-5.74787	9.03741e-09	6.10397e-07
chr3	2094813	2099813	ENSG00000144619.15	CNTN4	+	2098813	protein_coding	82.2438	-2.85277	0.438998	-6.49835	8.12031e-11	9.09657e-09
chr14	69259567	69264567	ENSG00000258520.1	ENSG00000258520	-	69260567	lncRNA	58.1118	-2.85176	0.450206	-6.33435	2.38339e-10	2.39311e-08
chr6	153281733	153286733	ENSG00000218426.5	ENSG00000218426	-	153282733	processed_pseudogene	47.1989	-2.84989	0.563442	-5.05801	4.23661e-07	1.87598e-05
chrX	152710586	152715586	ENSG00000183305.14	MAGEA2B	+	152714586	protein_coding	40.7498	-2.84969	0.536866	-5.30801	1.10828e-07	5.74165e-06
chrX	11317686	11322686	ENSG00000263652.1	MIR548AX	-	11318686	miRNA	45.6988	-2.8477	0.554404	-5.1365	2.799e-07	1.3089e-05
chrX	152752884	152757884	ENSG00000268606.6	MAGEA2	-	152753884	protein_coding	44.8688	-2.84756	0.521393	-5.46145	4.72254e-08	2.68016e-06
chr18	7116797	7121797	ENSG00000101680.16	LAMA1	-	7117797	protein_coding	23.8693	-2.84744	0.689812	-4.12785	3.66166e-05	0.000887609
chr3	3068242	3073242	ENSG00000237990.3	CNTN4-AS1	-	3069242	lncRNA	62.8428	-2.8473	0.502964	-5.66104	1.5046e-08	9.60064e-07
chr8	41270143	41275143	ENSG00000263372.1	MIR548AO	-	41271143	miRNA	23.535	-2.84695	0.6485	-4.39006	1.13319e-05	0.000323391
chr11	13958723	13963723	ENSG00000262655.4	SPON1	+	13962723	protein_coding	144.495	-2.8467	0.399288	-7.12943	1.00785e-12	1.73397e-10
chr6	146539833	146544833	ENSG00000118508.5	RAB32	+	146543833	protein_coding	26.4224	-2.84579	0.643788	-4.42038	9.85256e-06	0.000287877
chr17	83094377	83099377	ENSG00000274370.1	ENSG00000274370	+	83098377	lncRNA	26.7966	-2.84557	0.614781	-4.6286	3.68148e-06	0.000122806
chr17	12916342	12921342	ENSG00000265503.1	MIR1269B	-	12917342	miRNA	5.26287	-2.8452	1.51484	-1.87822	0.0603517	0.215972
chr1	17245098	17250098	ENSG00000142619.4	PADI3	+	17249098	protein_coding	38.4923	-2.8425	0.527849	-5.38507	7.24148e-08	3.99272e-06
chr22	25278943	25283943	ENSG00000285690.1	ENSG00000285690	+	25282943	transcribed_unprocessed_pseudogene	101.165	-2.84233	0.406448	-6.99308	2.68907e-12	4.18296e-10
chr6	1026225	1031225	ENSG00000270937.1	ENSG00000270937	-	1027225	lncRNA	57.3491	-2.84224	0.482853	-5.88634	3.94837e-09	2.92686e-07
chr2	5690488	5695488	ENSG00000224128.1	LINC01248	-	5691488	lncRNA	27.4089	-2.8407	0.612034	-4.6414	3.46054e-06	0.000116406
chr7	56228782	56233782	ENSG00000227491.1	CCNJP1	-	56229782	processed_pseudogene	23.9808	-2.84061	0.676935	-4.19628	2.71331e-05	0.000683956
chr4	1405442	1410442	ENSG00000235608.2	NKX1-1	-	1406442	protein_coding	38.8417	-2.8393	0.509293	-5.57498	2.47562e-08	1.49785e-06
chr11	69981876	69986876	ENSG00000255191.1	ENSG00000255191	+	69985876	lncRNA	33.948	-2.83861	0.567853	-4.99884	5.76748e-07	2.46654e-05
chr19	53716096	53721096	ENSG00000207735.1	MIR520D	+	53720096	miRNA	48.4316	-2.83766	0.586429	-4.83888	1.30575e-06	5.02258e-05
chrX	11334901	11339901	ENSG00000232392.1	GOT2P7	-	11335901	processed_pseudogene	43.1031	-2.83712	0.634994	-4.46795	7.89741e-06	0.000237452
chr17	6653034	6658034	ENSG00000274114.2	ALOX15P1	+	6657034	transcribed_unprocessed_pseudogene	31.1293	-2.8365	0.558408	-5.07963	3.78177e-07	1.69837e-05
chr3	137760315	137765315	ENSG00000168875.3	SOX14	+	137764315	protein_coding	129.969	-2.83649	0.385777	-7.35266	1.943e-13	3.83769e-11
chr11	89850953	89855953	ENSG00000204455.7	TRIM51BP	+	89854953	unprocessed_pseudogene	96.3981	-2.83316	0.448692	-6.31427	2.71446e-10	2.67192e-08
chr11	133809376	133814376	ENSG00000255258.2	LINC02743	-	133810376	lncRNA	101.17	-2.83251	0.432166	-6.55421	5.59362e-11	6.54704e-09
chr12	131663492	131668492	ENSG00000243499.1	RPS6P21	+	131667492	processed_pseudogene	72.5034	-2.83122	0.460397	-6.14952	7.77163e-10	6.79242e-08
chr14	105893523	105898523	ENSG00000227800.1	IGHD4-17	-	105894523	IG_D_gene	73.417	-2.83048	0.551691	-5.13055	2.88896e-07	1.34261e-05
chr10	42148549	42153549	ENSG00000229485.1	KSR1P1	-	42149549	processed_pseudogene	35.2697	-2.83043	0.531998	-5.32038	1.03553e-07	5.41143e-06
chr21	38237664	38242664	ENSG00000231123.1	SPATA20P1	-	38238664	processed_pseudogene	42.1365	-2.82875	1.0738	-2.63434	0.00843005	0.0615783
chr12	130043132	130048132	ENSG00000256298.1	ENSG00000256298	+	130047132	lncRNA	50.9981	-2.82858	0.484839	-5.83406	5.40952e-09	3.87601e-07
chr20	31471288	31476288	ENSG00000088320.4	REM1	+	31475288	protein_coding	27.4221	-2.82852	0.622126	-4.54654	5.45339e-06	0.000171796
chr14	105915856	105920856	ENSG00000211931.1	IGHD2-2	-	105916856	IG_D_gene	49.385	-2.82773	0.503149	-5.62007	1.90883e-08	1.18648e-06
chr13	77974539	77979539	ENSG00000233379.2	ENSG00000233379	-	77975539	lncRNA	31.4059	-2.82724	0.545606	-5.18182	2.19727e-07	1.05042e-05
chr13	77974529	77979529	ENSG00000136160.17	EDNRB	-	77975529	protein_coding	31.4691	-2.82709	0.542876	-5.20762	1.91282e-07	9.28482e-06
chrX	154373634	154378634	ENSG00000196924.19	FLNA	-	154374634	protein_coding	3.04934	-2.82708	1.7157	-1.64777	0.0994002	NA
chr14	105892561	105897561	ENSG00000211915.1	IGHD5-18	-	105893561	IG_D_gene	65.3374	-2.82449	0.540357	-5.22708	1.72208e-07	8.45659e-06
chr12	126457792	126462792	ENSG00000256125.1	FAM32EP	-	126458792	processed_pseudogene	45.9206	-2.82413	0.525523	-5.37395	7.70318e-08	4.18958e-06
chr17	48614292	48619292	ENSG00000120068.7	HOXB8	-	48615292	protein_coding	74.8862	-2.82319	0.419617	-6.72802	1.71983e-11	2.25471e-09
chr6	12286361	12291361	ENSG00000078401.7	EDN1	+	12290361	protein_coding	33.4465	-2.82261	0.530015	-5.32553	1.00658e-07	5.29504e-06
chr2	30896387	30901387	ENSG00000285984.1	ENSG00000285984	-	30897387	lncRNA	38.1124	-2.82219	0.62216	-4.53612	5.72994e-06	0.000179234
chr18	14542600	14547600	ENSG00000183206.18	POTEC	-	14543600	protein_coding	8.5141	-2.82115	1.24392	-2.26796	0.0233316	0.119441
chr1	205454954	205459954	ENSG00000186007.10	LEMD1	-	205455954	protein_coding	129.862	-2.82095	0.366096	-7.7055	1.30332e-14	3.41731e-12
chrX	73076167	73081167	ENSG00000231963.1	ENSG00000231963	+	73080167	lncRNA	39.048	-2.8206	0.498485	-5.65834	1.52846e-08	9.71163e-07
chr4	11428564	11433564	ENSG00000002587.10	HS3ST1	-	11429564	protein_coding	33.1739	-2.81838	0.558683	-5.04468	4.54272e-07	1.99433e-05
chrX	145995743	146000743	ENSG00000215943.1	MIR892A	-	145996743	miRNA	12.8612	-2.81822	0.888332	-3.17249	0.0015114	0.0183557
chr6	26099933	26104933	ENSG00000197061.5	H4C3	+	26103933	protein_coding	5.20701	-2.81809	1.50594	-1.87132	0.0613011	0.218092
chr20	24465629	24470629	ENSG00000101463.6	SYNDIG1	+	24469629	protein_coding	79.6937	-2.81682	0.461799	-6.09965	1.06299e-09	9.00232e-08
chr4	121060478	121065478	ENSG00000223006.1	RN7SKP137	-	121061478	misc_RNA	42.3586	-2.81653	0.469054	-6.0047	1.91686e-09	1.53461e-07
chrX	48379516	48384516	ENSG00000268009.6	SSX4	+	48383516	protein_coding	29.567	-2.81636	0.604051	-4.66245	3.12462e-06	0.000106237
chr1	32635951	32640951	ENSG00000200591.1	Y_RNA	+	32639951	misc_RNA	7.24315	-2.81588	1.30877	-2.15154	0.0314334	0.143977
chr15	59813749	59818749	ENSG00000286495.1	ENSG00000286495	-	59814749	lncRNA	86.8706	-2.8152	0.432978	-6.50195	7.92868e-11	8.8985e-09
chr18	47259935	47264935	ENSG00000287673.1	ENSG00000287673	+	47263935	lncRNA	66.5703	-2.81502	0.456575	-6.16551	7.02546e-10	6.21261e-08
chr12	131292176	131297176	ENSG00000226356.2	RPS6P20	-	131293176	unprocessed_pseudogene	49.1377	-2.81448	0.45893	-6.1327	8.64013e-10	7.48611e-08
chr1	4972298	4977298	ENSG00000284739.1	ENSG00000284739	-	4973298	lncRNA	75.1351	-2.81264	0.501333	-5.61033	2.01944e-08	1.24877e-06
chr11	18791721	18796721	ENSG00000110786.18	PTPN5	-	18792721	protein_coding	42.4808	-2.8096	0.495545	-5.66971	1.43036e-08	9.19538e-07
chrX	135767191	135772191	ENSG00000269096.7	CT45A3	-	135768191	protein_coding	50.3674	-2.80856	0.485362	-5.78653	7.18563e-09	5.01691e-07
chr8	137101352	137106352	ENSG00000206678.1	RNU6-144P	+	137105352	snRNA	58.7193	-2.80793	0.467746	-6.0031	1.93586e-09	1.54739e-07
chr8	12954387	12959387	ENSG00000251468.2	ENSG00000251468	+	12958387	unprocessed_pseudogene	38.7212	-2.80769	0.586541	-4.78687	1.69405e-06	6.26724e-05
chr17	80411165	80416165	ENSG00000173818.17	ENDOV	+	80415165	protein_coding	28.4666	-2.80715	0.576822	-4.86658	1.13545e-06	4.45068e-05
chr22	25278613	25283613	ENSG00000285968.1	ENSG00000285968	+	25282613	lncRNA	94.3802	-2.80663	0.414807	-6.76611	1.32293e-11	1.77308e-09
chr11	96504425	96509425	ENSG00000256684.1	LINC02737	+	96508425	lncRNA	70.476	-2.80658	0.419375	-6.69229	2.19705e-11	2.82483e-09
chr5	44388706	44393706	ENSG00000070193.5	FGF10	-	44389706	protein_coding	94.7941	-2.80573	0.471237	-5.95396	2.61739e-09	2.02524e-07
chr20	62704836	62709836	ENSG00000101188.5	NTSR1	+	62708836	protein_coding	46.9546	-2.80551	0.484257	-5.79343	6.89615e-09	4.83165e-07
chrX	70249042	70254042	ENSG00000200473.1	RNA5SP507	+	70253042	rRNA_pseudogene	12.1441	-2.80472	0.774541	-3.62113	0.000293315	0.00502333
chr2	7872670	7877670	ENSG00000290092.1	ENSG00000290092	+	7876670	lncRNA	75.2289	-2.804	0.428417	-6.54503	5.94824e-11	6.90824e-09
chr8	21293933	21298933	ENSG00000254334.2	ENSG00000254334	+	21297933	lncRNA	74.3702	-2.80276	0.519685	-5.39319	6.92192e-08	3.83413e-06
chr10	133226217	133231217	ENSG00000171794.4	UTF1	+	133230217	protein_coding	34.7969	-2.80171	0.563884	-4.96859	6.74412e-07	2.80821e-05
chr19	51180905	51185905	ENSG00000268336.1	SIGLEC20P	+	51184905	unprocessed_pseudogene	57.1564	-2.80115	0.478927	-5.84879	4.95163e-09	3.56922e-07
chr19	51180966	51185966	ENSG00000269072.2	ENSG00000269072	-	51181966	lncRNA	56.9075	-2.80113	0.479095	-5.8467	5.01421e-09	3.60999e-07
chr4	9206657	9211657	ENSG00000231396.3	USP17L10	+	9210657	protein_coding	18.0182	-2.80101	0.798164	-3.50931	0.000449264	0.00709511
chr7	67769468	67774468	ENSG00000223948.1	ENSG00000223948	-	67770468	processed_pseudogene	37.4471	-2.80094	0.605962	-4.62231	3.79489e-06	0.000126029
chrX	71872295	71877295	ENSG00000283178.1	ENSG00000283178	-	71873295	unprocessed_pseudogene	21.1279	-2.80064	0.619347	-4.52192	6.12821e-06	0.000190161
chrX	152742817	152747817	ENSG00000231447.1	ENSG00000231447	+	152746817	lncRNA	36.7885	-2.80045	0.590502	-4.74248	2.11113e-06	7.57686e-05
chr11	89760884	89765884	ENSG00000255170.2	ENSG00000255170	+	89764884	processed_pseudogene	61.3389	-2.79958	0.473421	-5.91351	3.34895e-09	2.52301e-07
chr8	229119	234119	ENSG00000272812.1	ENSG00000272812	+	233119	lncRNA	9.22847	-2.79932	1.00802	-2.77706	0.00548533	0.0462976
chr8	143013982	143018982	ENSG00000160932.11	LY6E	+	143017982	protein_coding	6.16419	-2.79859	1.48095	-1.88973	0.0587937	0.212228
chrX	52651207	52656207	ENSG00000228354.1	ENSG00000228354	+	52655207	processed_pseudogene	27.6786	-2.79843	0.622759	-4.4936	7.00295e-06	0.000214533
chr15	93300647	93305647	ENSG00000258971.1	ENSG00000258971	-	93301647	processed_pseudogene	53.0735	-2.79758	0.487875	-5.73423	9.79582e-09	6.57327e-07
chrX	153407472	153412472	ENSG00000189420.9	ZFP92	+	153411472	protein_coding	19.1926	-2.79735	0.667526	-4.19062	2.78188e-05	0.000698599
chr2	6491651	6496651	ENSG00000226488.2	LINC01824	+	6495651	lncRNA	31.8706	-2.79658	0.642474	-4.35284	1.34388e-05	0.000376011
chrX	52747132	52752132	ENSG00000268447.6	SSX2B	+	52751132	protein_coding	14.5732	-2.79575	0.747193	-3.74168	0.000182796	0.00343324
chr2	129989530	129994530	ENSG00000284619.1	ENSG00000284619	-	129990530	transcribed_unprocessed_pseudogene	59.1285	-2.79565	0.491877	-5.68364	1.31862e-08	8.6186e-07
chr1	38043314	38048314	ENSG00000224592.5	MIR3659HG	+	38047314	lncRNA	22.8814	-2.79319	0.627065	-4.45438	8.41359e-06	0.000250411
chr9	134637803	134642803	ENSG00000130635.16	COL5A1	+	134641803	protein_coding	29.0713	-2.79166	0.615918	-4.53252	5.82833e-06	0.000181985
chr11	113273032	113278032	ENSG00000227487.4	NCAM1-AS1	-	113274032	lncRNA	43.299	-2.79156	0.531976	-5.24753	1.54155e-07	7.69418e-06
chr14	105887578	105892578	ENSG00000211912.1	IGHD2-21	-	105888578	IG_D_gene	63.3145	-2.79148	0.418568	-6.66911	2.57359e-11	3.24026e-09
chr2	34795850	34800850	ENSG00000226994.9	ENSG00000226994	+	34799850	lncRNA	40.7562	-2.79097	0.566405	-4.92751	8.32829e-07	3.37881e-05
chr7	47025570	47030570	ENSG00000242552.1	MRPL42P4	-	47026570	processed_pseudogene	42.8851	-2.78918	0.59296	-4.70383	2.5533e-06	8.9498e-05
chr12	119182259	119187259	ENSG00000256609.1	ENSG00000256609	-	119183259	lncRNA	20.4831	-2.78893	0.701786	-3.97404	7.06629e-05	0.00155474
chrX	48429201	48434201	ENSG00000235350.1	ENSG00000235350	+	48433201	unprocessed_pseudogene	18.3452	-2.78786	0.813674	-3.42626	0.000611958	0.00911772
chr19	51139826	51144826	ENSG00000267895.1	ENSG00000267895	+	51143826	transcribed_unprocessed_pseudogene	95.1526	-2.78763	0.377946	-7.37575	1.63416e-13	3.29267e-11
chr10	3555314	3560314	ENSG00000236892.2	ENSG00000236892	-	3556314	lncRNA	34.9654	-2.78711	0.616695	-4.51943	6.20064e-06	0.00019221
chr21	44240545	44245545	ENSG00000275799.1	ENSG00000275799	+	44244545	lncRNA	46.5054	-2.78698	0.522587	-5.33304	9.65845e-08	5.11855e-06
chr15	32714004	32719004	ENSG00000166923.12	GREM1	+	32718004	protein_coding	59.5476	-2.78667	0.518426	-5.37526	7.64739e-08	4.16679e-06
chrX	15915303	15920303	ENSG00000200566.1	RNU5F-7P	-	15916303	snRNA	22.8921	-2.78612	0.621315	-4.48424	7.31749e-06	0.000222692
chr11	105820634	105825634	ENSG00000222663.1	RNU4-55P	+	105824634	snRNA	41.8558	-2.78539	0.531303	-5.24256	1.58367e-07	7.88474e-06
chr8	23705756	23710756	ENSG00000180053.8	NKX2-6	-	23706756	protein_coding	36.8197	-2.78402	0.544118	-5.11657	3.11145e-07	1.42832e-05
chr6	117263817	117268817	ENSG00000287253.1	ENSG00000287253	-	117264817	lncRNA	69.6449	-2.78307	0.396802	-7.01376	2.32001e-12	3.69502e-10
chr17	2022664	2027664	ENSG00000262869.1	ENSG00000262869	-	2023664	lncRNA	12.7355	-2.78262	0.879872	-3.16253	0.00156403	0.0188537
chr10	132184962	132189962	ENSG00000235010.1	JAKMIP3-AS1	-	132185962	lncRNA	15.9901	-2.78262	0.739774	-3.76145	0.000168935	0.00321302
chr2	11539677	11544677	ENSG00000264010.1	MIR4429	-	11540677	miRNA	36.6141	-2.78257	0.539274	-5.15985	2.47143e-07	1.16388e-05
chrX	11664920	11669920	ENSG00000047648.23	ARHGAP6	-	11665920	protein_coding	59.0067	-2.78239	0.449931	-6.18405	6.24791e-10	5.5909e-08
chr1	241353343	241358343	ENSG00000286496.1	ENSG00000286496	+	241357343	lncRNA	29.0831	-2.78224	0.57378	-4.84896	1.24111e-06	4.79855e-05
chr4	8977436	8982436	ENSG00000250804.1	OR7E111FP	+	8981436	unprocessed_pseudogene	77.2357	-2.78167	0.440046	-6.32132	2.59337e-10	2.57809e-08
chr20	19212477	19217477	ENSG00000235996.1	ENSG00000235996	-	19213477	lncRNA	114.534	-2.78104	0.446203	-6.23267	4.58557e-10	4.22943e-08
chr2	131587752	131592752	ENSG00000204434.6	POTEKP	+	131591752	unprocessed_pseudogene	48.8844	-2.77777	0.49856	-5.57159	2.52427e-08	1.52329e-06
chr17	5768234	5773234	ENSG00000284837.1	ENSG00000284837	+	5772234	lncRNA	47.658	-2.77735	0.507616	-5.47136	4.46592e-08	2.55383e-06
chr14	105885061	105890061	ENSG00000211911.1	IGHD3-22	-	105886061	IG_D_gene	63.6553	-2.77685	0.489224	-5.67604	1.37847e-08	8.93835e-07
chr17	21674086	21679086	ENSG00000274748.1	ENSG00000274748	+	21678086	unprocessed_pseudogene	47.7826	-2.77676	0.493912	-5.62197	1.88796e-08	1.17594e-06
chr6	46648915	46653915	ENSG00000153291.16	SLC25A27	+	46652915	protein_coding	16.715	-2.77669	0.774307	-3.58604	0.00033574	0.00560757
chr6	159041152	159046152	ENSG00000288845.1	ENSG00000288845	+	159045152	lncRNA	87.1188	-2.77654	0.44044	-6.30402	2.9003e-10	2.83164e-08
chr4	1023678	1028678	ENSG00000250259.1	ENSG00000250259	+	1027678	lncRNA	8.05872	-2.77612	1.07976	-2.57105	0.010139	0.0696554
chr4	9072949	9077949	ENSG00000287972.1	ENSG00000287972	+	9076949	lncRNA	41.3706	-2.77478	0.620436	-4.47231	7.73773e-06	0.000233235
chr8	8023652	8028652	ENSG00000215354.9	FAM90A24P	-	8024652	protein_coding	146.169	-2.7739	0.385401	-7.19745	6.13491e-13	1.1062e-10
chr11	13276403	13281403	ENSG00000290083.1	ENSG00000290083	-	13277403	lncRNA	40.2556	-2.77086	0.528745	-5.24045	1.60188e-07	7.96217e-06
chr5	6338884	6343884	ENSG00000250490.1	LINC02145	-	6339884	lncRNA	42.0722	-2.77003	0.553774	-5.00209	5.67128e-07	2.43407e-05
chr14	105902631	105907631	ENSG00000232543.2	IGHD4-11	-	105903631	IG_D_gene	46.523	-2.76705	0.522076	-5.30009	1.15743e-07	5.92977e-06
chr5	7347671	7352671	ENSG00000250668.2	LINC02123	-	7348671	lncRNA	38.0616	-2.76704	0.617767	-4.47911	7.4956e-06	0.000227536
chr8	41294163	41299163	ENSG00000206852.1	RNU6-895P	+	41298163	snRNA	28.5271	-2.76684	0.59848	-4.62312	3.78013e-06	0.000125608
chr8	7726739	7731739	ENSG00000285620.1	FAM90A16	+	7730739	protein_coding	55.7898	-2.76638	0.491517	-5.62824	1.82055e-08	1.14106e-06
chr9	110930406	110935406	ENSG00000207401.1	Y_RNA	+	110934406	misc_RNA	29.8533	-2.76613	0.589726	-4.69053	2.725e-06	9.41427e-05
chr5	44384732	44389732	ENSG00000248464.1	FGF10-AS1	+	44388732	lncRNA	118.148	-2.76587	0.430815	-6.42009	1.36194e-10	1.43216e-08
chr12	127454634	127459634	ENSG00000287365.1	ENSG00000287365	-	127455634	lncRNA	41.6293	-2.76572	0.525064	-5.2674	1.38367e-07	6.95821e-06
chr10	102415189	102420189	ENSG00000107872.14	FBXL15	+	102419189	protein_coding	44.9774	-2.76459	0.527645	-5.23949	1.61018e-07	7.9902e-06
chr2	219057750	219062750	ENSG00000264755.1	MIR3131	-	219058750	miRNA	76.9228	-2.76301	0.417483	-6.61826	3.63456e-11	4.39101e-09
chr16	15856028	15861028	ENSG00000133392.18	MYH11	-	15857028	protein_coding	60.0872	-2.76232	0.44361	-6.22691	4.75735e-10	4.37443e-08
chr17	2049008	2054008	ENSG00000267200.1	MIR132	-	2050008	miRNA	17.9802	-2.76143	0.76341	-3.61723	0.000297769	0.00508511
chrX	104062037	104067037	ENSG00000235946.1	H2BW3P	-	104063037	processed_pseudogene	34.8788	-2.76101	0.601986	-4.58651	4.50716e-06	0.000146523
chr18	6950677	6955677	ENSG00000265069.1	ENSG00000265069	+	6954677	lncRNA	35.0235	-2.76097	0.527079	-5.23825	1.62104e-07	8.03748e-06
chr13	110119208	110124208	ENSG00000279965.1	ENSG00000279965	+	110123208	TEC	111.019	-2.76044	0.437855	-6.30446	2.89205e-10	2.82922e-08
chr6	6584108	6589108	ENSG00000112799.9	LY86	+	6588108	protein_coding	56.7778	-2.76005	0.458293	-6.02247	1.71779e-09	1.39015e-07
chr10	3744966	3749966	ENSG00000229672.3	ENSG00000229672	+	3748966	lncRNA	40.814	-2.76	0.517383	-5.33455	9.5783e-08	5.08056e-06
chr12	102957410	102962410	ENSG00000171759.10	PAH	-	102958410	protein_coding	11.2683	-2.75997	0.818793	-3.37078	0.000749546	0.0106447
chr4	4156443	4161443	ENSG00000250710.3	OR7E99P	-	4157443	unprocessed_pseudogene	114.339	-2.75696	0.396444	-6.95424	3.54471e-12	5.41573e-10
chr19	54369558	54374558	ENSG00000167613.16	LAIR1	-	54370558	protein_coding	118.037	-2.75674	0.394451	-6.98881	2.77235e-12	4.29029e-10
chr20	63231883	63236883	ENSG00000101197.13	BIRC7	+	63235883	protein_coding	52.8363	-2.75655	0.502195	-5.489	4.0421e-08	2.33145e-06
chr9	133528164	133533164	ENSG00000197859.11	ADAMTSL2	+	133532164	protein_coding	47.4081	-2.75594	0.531108	-5.18903	2.1139e-07	1.0138e-05
chr14	104136898	104141898	ENSG00000258748.1	KIF26A-DT	-	104137898	lncRNA	9.19671	-2.75464	1.16969	-2.35502	0.0185219	0.10309
chr21	31343736	31348736	ENSG00000286643.1	ENSG00000286643	+	31347736	lncRNA	72.2664	-2.75147	0.483064	-5.69587	1.22742e-08	8.07223e-07
chr15	96444154	96449154	ENSG00000242295.1	ENSG00000242295	+	96448154	processed_pseudogene	56.5128	-2.75069	0.825443	-3.33238	0.000861054	0.0118771
chr14	105894670	105899670	ENSG00000211917.1	IGHD3-16	-	105895670	IG_D_gene	68.8828	-2.74997	0.53672	-5.12366	2.99665e-07	1.37773e-05
chr5	6847462	6852462	ENSG00000200243.1	RN7SKP79	-	6848462	misc_RNA	57.162	-2.74974	0.458617	-5.99573	2.02578e-09	1.60894e-07
chr7	157573422	157578422	ENSG00000207960.1	MIR153-2	-	157574422	miRNA	48.2396	-2.74848	0.507679	-5.41381	6.16983e-08	3.43656e-06
chr10	3987160	3992160	ENSG00000274809.1	MIR6078	+	3991160	miRNA	34.4964	-2.74726	0.529885	-5.18464	2.16434e-07	1.03633e-05
chr1	76863480	76868480	ENSG00000117069.15	ST6GALNAC5	+	76867480	protein_coding	90.6854	-2.74581	0.441308	-6.22198	4.90905e-10	4.50235e-08
chr15	98292199	98297199	ENSG00000259199.2	ENSG00000259199	-	98293199	lncRNA	52.5165	-2.74545	0.526276	-5.21676	1.82085e-07	8.87427e-06
chr9	135071422	135076422	ENSG00000130558.20	OLFM1	+	135075422	protein_coding	22.7149	-2.74474	0.689155	-3.98277	6.8118e-05	0.00150758
chr17	10372130	10377130	ENSG00000006788.14	MYH13	-	10373130	protein_coding	35.9705	-2.74451	0.531569	-5.16304	2.42976e-07	1.14605e-05
chr2	107902134	107907134	ENSG00000233494.1	ENSG00000233494	-	107903134	processed_pseudogene	40.4703	-2.74408	0.546194	-5.024	5.06054e-07	2.19548e-05
chr14	105742071	105747071	ENSG00000211896.7	IGHG1	-	105743071	IG_C_gene	64.0206	-2.74393	0.472788	-5.80372	6.4859e-09	4.58704e-07
chr5	40905492	40910492	ENSG00000112936.20	C7	+	40909492	protein_coding	49.0911	-2.74306	0.489389	-5.60507	2.08176e-08	1.27895e-06
chr21	41176097	41181097	ENSG00000224388.1	BACE2-IT1	+	41180097	lncRNA	22.7782	-2.74139	0.703486	-3.89687	9.74454e-05	0.00203513
chr19	22447777	22452777	ENSG00000268830.1	BNIP3P32	-	22448777	processed_pseudogene	7.06286	-2.74121	1.25687	-2.18098	0.029185	0.137593
chr16	12877170	12882170	ENSG00000241932.1	RPL35AP34	+	12881170	processed_pseudogene	32.7577	-2.74078	0.568792	-4.81859	1.44575e-06	5.49421e-05
chr1	20728880	20733880	ENSG00000233069.1	ENSG00000233069	+	20732880	lncRNA	4.34166	-2.74076	1.27005	-2.15799	0.0309286	0.142655
chr17	5768926	5773926	ENSG00000285471.1	ENSG00000285471	+	5772926	protein_coding	46.5076	-2.73976	0.553347	-4.95126	7.37364e-07	3.03873e-05
chr11	90081950	90086950	ENSG00000255009.4	UBTFL1	+	90085950	protein_coding	41.1014	-2.73859	0.527201	-5.19458	2.05179e-07	9.87955e-06
chr10	77637369	77642369	ENSG00000156113.24	KCNMA1	-	77638369	protein_coding	87.1633	-2.73819	0.46068	-5.94379	2.78511e-09	2.14397e-07
chr13	18293554	18298554	ENSG00000279730.2	KMT5AP1	+	18297554	processed_pseudogene	9.37594	-2.73813	1.03367	-2.64894	0.00807458	0.0598039
chr21	41745841	41750841	ENSG00000275166.1	MIR6814	-	41746841	miRNA	25.0836	-2.73756	0.606129	-4.51647	6.28802e-06	0.000194591
chr19	46202160	46207160	ENSG00000268621.6	IGFL2-AS1	-	46203160	lncRNA	49.0715	-2.73654	0.473366	-5.78102	7.42489e-09	5.14804e-07
chr3	190116944	190121944	ENSG00000225764.3	P3H2-AS1	+	190120944	lncRNA	65.4269	-2.73555	0.437368	-6.25457	3.98612e-10	3.76325e-08
chr2	238925269	238930269	ENSG00000227744.4	LINC01940	-	238926269	lncRNA	48.3828	-2.73507	0.471535	-5.80034	6.61797e-09	4.66396e-07
chr19	51120906	51125906	ENSG00000129450.9	SIGLEC9	+	51124906	protein_coding	52.3487	-2.73493	0.488661	-5.59679	2.18363e-08	1.33381e-06
chr4	75033824	75038824	ENSG00000248165.1	ENSG00000248165	-	75034824	lncRNA	25.9862	-2.7344	0.769793	-3.55213	0.000382131	0.0062265
chr11	134559396	134564396	ENSG00000254573.1	ENSG00000254573	+	134563396	lncRNA	69.6775	-2.73414	0.446143	-6.12838	8.87781e-10	7.6589e-08
chr20	38597809	38602809	ENSG00000124143.11	ARHGAP40	+	38601809	protein_coding	100.553	-2.73259	0.351355	-7.77729	7.40926e-15	2.05015e-12
chr11	70704269	70709269	ENSG00000207196.1	Y_RNA	-	70705269	misc_RNA	26.5007	-2.732	0.639305	-4.27339	1.92523e-05	0.000508125
chr16	25687959	25692959	ENSG00000182601.7	HS3ST4	+	25691959	protein_coding	84.734	-2.72968	0.430606	-6.33916	2.31019e-10	2.3235e-08
chr16	79228453	79233453	ENSG00000261722.1	ENSG00000261722	-	79229453	lncRNA	27.3377	-2.7286	0.6917	-3.94477	7.98761e-05	0.00172149
chr13	103416825	103421825	ENSG00000234551.2	LINC01309	+	103420825	lncRNA	17.9779	-2.72772	0.769597	-3.54435	0.000393587	0.00638718
chr19	672392	677392	ENSG00000070404.10	FSTL3	+	676392	protein_coding	41.082	-2.72679	0.480791	-5.67147	1.4158e-08	9.11147e-07
chr19	2289173	2294173	ENSG00000288156.1	ENSG00000288156	+	2293173	lncRNA	19.056	-2.72564	0.712069	-3.82778	0.000129305	0.00255899
chr5	40675915	40680915	ENSG00000171522.6	PTGER4	+	40679915	protein_coding	22.5875	-2.72544	0.6347	-4.29407	1.75431e-05	0.000470249
chr2	131031092	131036092	ENSG00000284479.1	SMIM39	+	131035092	protein_coding	21.9313	-2.7252	0.734969	-3.70791	0.000208976	0.00381971
chr6	50089389	50094389	ENSG00000226733.4	ENSG00000226733	+	50093389	lncRNA	40.7225	-2.72511	0.578911	-4.70731	2.51002e-06	8.82379e-05
chr12	128395978	128400978	ENSG00000257025.1	ENSG00000257025	+	128399978	lncRNA	40.7613	-2.72479	0.516065	-5.27993	1.29236e-07	6.54288e-06
chr14	101062724	101067724	ENSG00000207959.1	MIR656	+	101066724	miRNA	59.3144	-2.72403	0.470053	-5.79516	6.82556e-09	4.78778e-07
chr10	131772386	131777386	ENSG00000286295.1	ENSG00000286295	+	131776386	lncRNA	61.9144	-2.7234	0.506038	-5.3818	7.37445e-08	4.04376e-06
chr12	127480243	127485243	ENSG00000287112.1	ENSG00000287112	+	127484243	lncRNA	29.9437	-2.72226	0.583664	-4.66409	3.09993e-06	0.000105583
chr9	90228185	90233185	ENSG00000225072.1	OR7E116P	+	90232185	unprocessed_pseudogene	48.7415	-2.72216	0.458354	-5.93901	2.86754e-09	2.19896e-07
chr18	7227089	7232089	ENSG00000206422.3	LRRC30	+	7231089	protein_coding	46.5289	-2.71955	0.516758	-5.26272	1.41938e-07	7.12588e-06
chr9	136204128	136209128	ENSG00000107187.17	LHX3	-	136205128	protein_coding	17.3543	-2.71913	0.817934	-3.32439	0.000886134	0.0121523
chr15	96434570	96439570	ENSG00000259312.1	ENSG00000259312	+	96438570	lncRNA	54.222	-2.71766	0.907267	-2.99543	0.00274054	0.0284841
chr14	106478435	106483435	ENSG00000270816.6	LINC00221	+	106482435	lncRNA	21.0949	-2.71756	0.762432	-3.56433	0.000364781	0.00599916
chr2	5970662	5975662	ENSG00000276733.1	MIR7158	+	5974662	miRNA	33.5918	-2.71669	0.588872	-4.61338	3.96182e-06	0.000130705
chrX	3936855	3941855	ENSG00000285756.2	ENSG00000285756	-	3937855	lncRNA	28.0869	-2.71535	0.655275	-4.14383	3.41556e-05	0.000834693
chr17	58330318	58335318	ENSG00000284353.1	MIR142	-	58331318	miRNA	11.6339	-2.71517	0.929061	-2.92249	0.00347242	0.0338087
chr11	118151888	118156888	ENSG00000177098.9	SCN4B	-	118152888	protein_coding	37.6169	-2.7151	0.492977	-5.50755	3.63869e-08	2.13153e-06
chr3	190121437	190126437	ENSG00000090530.10	P3H2	-	190122437	protein_coding	47.7236	-2.71386	0.482584	-5.6236	1.87013e-08	1.16726e-06
chr9	21395346	21400346	ENSG00000261696.1	ENSG00000261696	-	21396346	lncRNA	44.7281	-2.71344	0.510467	-5.3156	1.06308e-07	5.52656e-06
chr12	132328589	132333589	ENSG00000182870.13	GALNT9	-	132329589	protein_coding	118.293	-2.71332	0.367531	-7.38257	1.55265e-13	3.13896e-11
chrX	1289918	1294918	ENSG00000265658.6	MIR3690	+	1293918	miRNA	31.5416	-2.71324	0.594771	-4.56183	5.07092e-06	0.000162215
chr8	85657514	85662514	ENSG00000273567.1	REXO1L3P	-	85658514	processed_pseudogene	509.848	-2.71323	0.292809	-9.26623	1.92842e-20	1.99639e-17
chr22	16419943	16424943	ENSG00000229658.1	PABPC1P9	+	16423943	unprocessed_pseudogene	39.8591	-2.71239	0.558679	-4.85501	1.20383e-06	4.68759e-05
chr13	107834451	107839451	ENSG00000227248.1	NALF1-IT1	-	107835451	lncRNA	73.5676	-2.71211	0.483674	-5.60731	2.05497e-08	1.26682e-06
chr2	132670579	132675579	ENSG00000150551.11	LYPD1	-	132671579	protein_coding	53.0889	-2.71211	0.534369	-5.07534	3.86798e-07	1.73062e-05
chr5	38193432	38198432	ENSG00000276332.1	ENSG00000276332	+	38197432	processed_pseudogene	68.7771	-2.7115	0.439182	-6.17397	6.65947e-10	5.92387e-08
chr21	44240446	44245446	ENSG00000160223.18	ICOSLG	-	44241446	protein_coding	45.5018	-2.70822	0.513029	-5.27888	1.29976e-07	6.56926e-06
chr19	54870235	54875235	ENSG00000186431.19	FCAR	+	54874235	protein_coding	55.9268	-2.708	0.453193	-5.97537	2.29564e-09	1.79479e-07
chr17	2744078	2749078	ENSG00000272920.1	hsa-mir-1253	+	2748078	lncRNA	96.4498	-2.7076	0.395396	-6.84783	7.49783e-12	1.0643e-09
chr17	4641294	4646294	ENSG00000161905.13	ALOX15	-	4642294	protein_coding	66.9557	-2.70715	0.377907	-7.16354	7.86186e-13	1.3925e-10
chr22	22914132	22919132	ENSG00000211682.2	IGLJ6	+	22918132	IG_J_gene	44.4344	-2.70504	0.515006	-5.25243	1.50104e-07	7.50447e-06
chr14	105904491	105909491	ENSG00000288730.1	ENSG00000288730	-	105905491	lncRNA	54.7904	-2.70099	0.506135	-5.33649	9.47628e-08	5.03534e-06
chr12	131660823	131665823	ENSG00000256424.2	LINC02414	-	131661823	lncRNA	37.1914	-2.70078	0.552998	-4.88389	1.04015e-06	4.13882e-05
chr13	89235890	89240890	ENSG00000232225.6	LINC01047	-	89236890	lncRNA	17.8014	-2.6993	0.768988	-3.51019	0.00044778	0.00707726
chr15	98420021	98425021	ENSG00000277987.3	LINC02351	-	98421021	lncRNA	32.0211	-2.69844	0.56992	-4.73477	2.19304e-06	7.83336e-05
chr18	6016839	6021839	ENSG00000200637.1	RNU5F-3P	-	6017839	snRNA	56.2305	-2.69831	0.44759	-6.02854	1.65452e-09	1.34795e-07
chr16	1329638	1334638	ENSG00000007516.14	BAIAP3	+	1333638	protein_coding	27.5664	-2.69724	0.564199	-4.78066	1.74724e-06	6.43234e-05
chr17	34575487	34580487	ENSG00000181291.8	TMEM132E	+	34579487	protein_coding	70.8136	-2.69689	0.448926	-6.00743	1.88482e-09	1.51299e-07
chr9	133527612	133532612	ENSG00000187616.5	MYMK	-	133528612	protein_coding	50.9763	-2.6952	0.494257	-5.45303	4.95194e-08	2.80504e-06
chr11	69981907	69986907	ENSG00000131620.18	ANO1	+	69985907	protein_coding	34.4966	-2.69445	0.548895	-4.90886	9.16055e-07	3.6841e-05
chr8	131039909	131044909	ENSG00000155897.10	ADCY8	-	131040909	protein_coding	110.159	-2.6936	0.414952	-6.49134	8.50777e-11	9.46001e-09
chr19	7916338	7921338	ENSG00000104976.12	SNAPC2	+	7920338	protein_coding	20.9589	-2.69075	0.632623	-4.25332	2.10624e-05	0.000548901
chr2	103868651	103873651	ENSG00000232597.6	ENSG00000232597	-	103869651	lncRNA	44.4307	-2.69032	0.530029	-5.07581	3.85858e-07	1.7277e-05
chr12	131622203	131627203	ENSG00000256258.1	ENSG00000256258	-	131623203	lncRNA	69.2497	-2.68995	0.407993	-6.59312	4.3068e-11	5.1411e-09
chr6	170608622	170613622	ENSG00000287411.1	ENSG00000287411	+	170612622	lncRNA	76.6405	-2.68979	0.436572	-6.16117	7.22113e-10	6.36689e-08
chr2	219683795	219688795	ENSG00000231802.1	DNAJB6P3	-	219684795	processed_pseudogene	49.6447	-2.68809	0.461248	-5.82786	5.6143e-09	4.01475e-07
chrX	154616096	154621096	ENSG00000273773.1	ENSG00000273773	+	154620096	unprocessed_pseudogene	9.7166	-2.68764	0.934063	-2.87737	0.00401008	0.0373651
chr11	112973353	112978353	ENSG00000238998.1	RNU7-187P	+	112977353	snRNA	55.4707	-2.68569	0.540324	-4.97051	6.67761e-07	2.79019e-05
chr12	129009336	129014336	ENSG00000256581.1	NLRP9P1	+	129013336	unprocessed_pseudogene	39.7308	-2.68558	0.572285	-4.69274	2.69569e-06	9.3408e-05
chr4	13647400	13652400	ENSG00000242209.1	RPL32P12	-	13648400	processed_pseudogene	112.613	-2.6844	0.401431	-6.68709	2.27655e-11	2.92079e-09
chr21	38497159	38502159	ENSG00000289404.2	ENSG00000289404	-	38498159	lncRNA	63.9363	-2.68425	0.446645	-6.00981	1.8574e-09	1.49298e-07
chr12	131023741	131028741	ENSG00000279128.1	ENSG00000279128	-	131024741	TEC	62.2828	-2.68351	0.458513	-5.85265	4.83793e-09	3.49986e-07
chr12	38151476	38156476	ENSG00000287442.1	ENSG00000287442	+	38155476	lncRNA	19.5104	-2.6833	0.683908	-3.92348	8.72775e-05	0.00185242
chr14	60511119	60516119	ENSG00000258670.1	ENSG00000258670	+	60515119	lncRNA	36.1609	-2.68162	0.477828	-5.61209	1.999e-08	1.23996e-06
chr14	101559422	101564422	ENSG00000283857.1	MIR1247	-	101560422	miRNA	40.0398	-2.68131	0.479262	-5.59467	2.2104e-08	1.34879e-06
chr2	5688384	5693384	ENSG00000176887.7	SOX11	+	5692384	protein_coding	30.8781	-2.68127	0.623158	-4.30272	1.68718e-05	0.000455712
chr11	105351956	105356956	ENSG00000278640.1	Metazoa_SRP	-	105352956	misc_RNA	24.0743	-2.6804	0.634137	-4.22684	2.36995e-05	0.000608141
chr11	56331488	56336488	ENSG00000254722.1	FAM8A2P	-	56332488	unprocessed_pseudogene	21.3204	-2.67979	0.743925	-3.60223	0.000315497	0.0053303
chr19	53132077	53137077	ENSG00000170954.12	ZNF415	-	53133077	protein_coding	22.4717	-2.67879	0.707098	-3.78842	0.000151606	0.00293079
chr10	1207389	1212389	ENSG00000287043.1	ENSG00000287043	-	1208389	lncRNA	50.7263	-2.67839	0.501736	-5.33825	9.38474e-08	4.99112e-06
chr17	48625358	48630358	ENSG00000170689.10	HOXB9	-	48626358	protein_coding	59.9369	-2.67775	0.431176	-6.21035	5.28677e-10	4.8024e-08
chr5	520109	525109	ENSG00000250385.2	ENSG00000250385	+	524109	lncRNA	21.1426	-2.67659	0.633387	-4.22583	2.38057e-05	0.00061059
chr7	519296	524296	ENSG00000197461.13	PDGFA	-	520296	protein_coding	29.4325	-2.67564	0.571223	-4.68405	2.81257e-06	9.68892e-05
chrX	154647275	154652275	ENSG00000275882.1	IKBKGP1	-	154648275	unprocessed_pseudogene	22.1336	-2.67557	0.604239	-4.428	9.51131e-06	0.000278992
chr7	114082327	114087327	ENSG00000128573.27	FOXP2	+	114086327	protein_coding	60.9873	-2.67545	0.439588	-6.08625	1.15586e-09	9.70662e-08
chr1	204684738	204689738	ENSG00000170382.12	LRRN2	-	204685738	protein_coding	106.154	-2.67511	0.423282	-6.31993	2.61679e-10	2.59706e-08
chr21	46420034	46425034	ENSG00000225043.1	RPL18AP2	-	46421034	processed_pseudogene	3.79704	-2.67498	1.78517	-1.49845	0.134018	NA
chr12	132347855	132352855	ENSG00000279704.1	ENSG00000279704	+	132351855	TEC	89.527	-2.67343	0.39487	-6.77041	1.2842e-11	1.72889e-09
chr16	17469960	17474960	ENSG00000103489.12	XYLT1	-	17470960	protein_coding	60.0505	-2.6734	0.427772	-6.24958	4.11556e-10	3.86721e-08
chr21	44550505	44555505	ENSG00000205445.3	KRTAP10-2	-	44551505	protein_coding	45.3618	-2.67264	0.477063	-5.60228	2.11553e-08	1.29485e-06
chr7	45920874	45925874	ENSG00000146674.16	IGFBP3	-	45921874	protein_coding	51.8395	-2.67223	0.496976	-5.37697	7.5749e-08	4.13104e-06
chr8	11949753	11954753	ENSG00000287798.1	ENSG00000287798	-	11950753	lncRNA	74.3286	-2.67124	0.443696	-6.02042	1.73963e-09	1.40585e-07
chr21	38237201	38242201	ENSG00000226012.1	ENSG00000226012	-	38238201	lncRNA	39.1755	-2.66943	1.08508	-2.46011	0.0138893	0.0857643
chr12	4269762	4274762	ENSG00000285901.2	ENSG00000285901	+	4273762	protein_coding	52.824	-2.6686	0.459511	-5.80748	6.342e-09	4.49055e-07
chr7	37448223	37453223	ENSG00000155849.16	ELMO1	-	37449223	protein_coding	101.949	-2.66775	0.385196	-6.9257	4.33835e-12	6.43189e-10
chr6	159165400	159170400	ENSG00000164694.17	FNDC1	+	159169400	protein_coding	42.3502	-2.6675	0.449991	-5.92789	3.0685e-09	2.33517e-07
chr16	27066858	27071858	ENSG00000261482.1	ENSG00000261482	-	27067858	lncRNA	50.502	-2.66718	0.929998	-2.86794	0.00413158	0.0381598
chr18	499722	504722	ENSG00000158270.12	COLEC12	-	500722	protein_coding	55.952	-2.66559	0.500539	-5.32544	1.00708e-07	5.29504e-06
chrX	19121637	19126637	ENSG00000173698.18	ADGRG2	-	19122637	protein_coding	56.0483	-2.6652	0.478075	-5.57487	2.47712e-08	1.49785e-06
chr8	7764977	7769977	ENSG00000285950.1	FAM90A10	+	7768977	protein_coding	246.454	-2.66503	0.318289	-8.37299	5.61754e-17	2.31577e-14
chr8	43538076	43543076	ENSG00000253195.2	ENSG00000253195	+	43542076	unprocessed_pseudogene	11.5127	-2.6649	0.969684	-2.74822	0.00599207	0.0492725
chr22	22918594	22923594	ENSG00000211685.3	IGLC7	+	22922594	IG_C_gene	25.5473	-2.66461	0.617192	-4.31731	1.57945e-05	0.000432792
chr9	90742380	90747380	ENSG00000236316.2	OR7E109P	-	90743380	unprocessed_pseudogene	66.7682	-2.66412	0.547721	-4.86402	1.15027e-06	4.50239e-05
chrX	152826967	152831967	ENSG00000147383.11	NSDHL	+	152830967	protein_coding	6.54317	-2.664	1.26788	-2.10114	0.0356285	0.155663
chr12	127482938	127487938	ENSG00000286922.1	ENSG00000286922	+	127486938	lncRNA	44.797	-2.66238	0.522693	-5.09359	3.51343e-07	1.58975e-05
chr6	32406181	32411181	ENSG00000204290.11	BTNL2	-	32407181	protein_coding	67.4423	-2.66057	0.464651	-5.72596	1.02848e-08	6.86919e-07
chr20	57959176	57964176	ENSG00000203971.2	ENSG00000203971	-	57960176	lncRNA	41.3198	-2.65824	0.531457	-5.0018	5.67969e-07	2.4342e-05
chr17	73161010	73166010	ENSG00000180616.9	SSTR2	+	73165010	protein_coding	84.4928	-2.65617	0.399573	-6.64752	2.9808e-11	3.67631e-09
chrX	48302769	48307769	ENSG00000234391.1	ENSG00000234391	+	48306769	processed_pseudogene	25.6352	-2.65612	0.58862	-4.51246	6.40812e-06	0.000197927
chr4	8986455	8991455	ENSG00000249347.1	ENSG00000249347	+	8990455	processed_pseudogene	88.5348	-2.65505	0.412051	-6.44349	1.16755e-10	1.24741e-08
chr22	22294124	22299124	ENSG00000286129.1	ENSG00000286129	+	22298124	lncRNA	7.47188	-2.65392	1.17593	-2.25687	0.0240161	0.121629
chr8	85662497	85667497	ENSG00000205176.3	REXO1L1P	-	85663497	transcribed_processed_pseudogene	76.0723	-2.6533	0.433374	-6.12243	9.21599e-10	7.91652e-08
chr13	92179885	92184885	ENSG00000229287.1	FABP5P4	-	92180885	processed_pseudogene	19.7874	-2.65322	0.625415	-4.24234	2.21203e-05	0.000572497
chr2	130276299	130281299	ENSG00000234934.1	MTND5P29	+	130280299	unprocessed_pseudogene	60.2642	-2.65308	0.47495	-5.58602	2.32328e-08	1.41051e-06
chr2	106940482	106945482	ENSG00000229360.1	PPP1R2P5	-	106941482	processed_pseudogene	41.5318	-2.64924	0.557758	-4.7498	2.03613e-06	7.36934e-05
chr2	34808556	34813556	ENSG00000264352.2	RN7SL602P	-	34809556	misc_RNA	18.2456	-2.64878	0.742417	-3.56778	0.000360024	0.00593066
chr20	52481991	52486991	ENSG00000275958.1	ENSG00000275958	-	52482991	misc_RNA	21.4152	-2.64818	0.608188	-4.35421	1.33549e-05	0.000374188
chr13	87764881	87769881	ENSG00000277640.1	ENSG00000277640	-	87765881	processed_pseudogene	25.8156	-2.64817	0.665639	-3.97838	6.93852e-05	0.00153191
chr2	101987960	101992960	ENSG00000115590.14	IL1R2	+	101991960	protein_coding	55.4095	-2.64705	0.436445	-6.06503	1.3193e-09	1.09718e-07
chr2	239534379	239539379	ENSG00000286188.1	ENSG00000286188	+	239538379	lncRNA	61.1599	-2.64681	0.444041	-5.96073	2.51113e-09	1.95056e-07
chr19	54949130	54954130	ENSG00000022556.16	NLRP2	+	54953130	protein_coding	33.2688	-2.64627	0.584392	-4.52824	5.94768e-06	0.000185038
chr2	95639604	95644604	ENSG00000235959.1	ENSG00000235959	-	95640604	processed_pseudogene	60.8112	-2.64509	0.458121	-5.77379	7.75066e-09	5.32472e-07
chr2	100100919	100105919	ENSG00000230393.1	ENSG00000230393	+	100104919	lncRNA	42.7443	-2.64463	0.481336	-5.49435	3.92162e-08	2.2685e-06
chr6	159886988	159891988	ENSG00000236823.2	ENSG00000236823	+	159890988	lncRNA	173.098	-2.64459	0.347372	-7.61314	2.6752e-14	6.3996e-12
chr6	159886988	159891988	ENSG00000130368.7	MAS1	+	159890988	protein_coding	173.098	-2.64459	0.347372	-7.61314	2.6752e-14	6.3996e-12
chr19	52170643	52175643	ENSG00000196267.14	ZNF836	-	52171643	protein_coding	5.32773	-2.64458	1.56837	-1.6862	0.0917575	0.277808
chr19	52170533	52175533	ENSG00000267827.5	ENSG00000267827	-	52171533	lncRNA	5.38901	-2.64439	1.56723	-1.6873	0.0915457	0.277401
chr13	107319963	107324963	ENSG00000201847.1	SNORD31B	-	107320963	snoRNA	39.0296	-2.64416	0.505863	-5.22704	1.72247e-07	8.45659e-06
chr17	73160977	73165977	ENSG00000264860.1	ENSG00000264860	+	73164977	lncRNA	84.1993	-2.64383	0.398875	-6.62822	3.39769e-11	4.16349e-09
chr12	2334702	2339702	ENSG00000285555.1	ENSG00000285555	-	2335702	lncRNA	45.0182	-2.64334	0.448172	-5.89805	3.67818e-09	2.74692e-07
chr13	87673235	87678235	ENSG00000228824.8	MIR4500HG	-	87674235	lncRNA	12.1919	-2.6432	0.803415	-3.28996	0.00100202	0.0133879
chrX	91982505	91987505	ENSG00000234702.1	VDAC1P3	-	91983505	processed_pseudogene	8.21262	-2.64274	0.986076	-2.68006	0.00736096	0.0563938
chrX	141241517	141246517	ENSG00000198573.7	SPANXC	-	141242517	protein_coding	6.71633	-2.64268	1.10653	-2.38826	0.0169283	0.0973829
chr4	73849296	73854296	ENSG00000109272.4	PF4V1	+	73853296	protein_coding	35.4382	-2.64252	0.565184	-4.67551	2.93231e-06	0.000100438
chr10	126397789	126402789	ENSG00000287609.1	ENSG00000287609	-	126398789	lncRNA	81.1076	-2.64243	0.447412	-5.90604	3.50419e-09	2.63336e-07
chr5	5077311	5082311	ENSG00000250529.1	LINC02121	-	5078311	lncRNA	68.8698	-2.64075	0.441616	-5.97974	2.23489e-09	1.75414e-07
chr17	72421939	72426939	ENSG00000263680.2	ENSG00000263680	+	72425939	lncRNA	40.3767	-2.64012	0.61177	-4.31553	1.59217e-05	0.000434942
chr19	8777861	8782861	ENSG00000268922.1	ENSG00000268922	-	8778861	processed_pseudogene	300.028	-2.63905	0.358182	-7.3679	1.7334e-13	3.46934e-11
chr11	89920064	89925064	ENSG00000233802.8	TRIM49D2	+	89924064	protein_coding	45.6521	-2.63815	0.505029	-5.22375	1.7534e-07	8.57339e-06
chr7	107998982	108003982	ENSG00000238297.2	U3	-	107999982	snoRNA	59.3983	-2.6381	0.416524	-6.33361	2.39494e-10	2.4007e-08
chr17	2050154	2055154	ENSG00000177374.13	HIC1	+	2054154	protein_coding	18.7772	-2.63712	0.729389	-3.61552	0.000299744	0.00510866
chr12	45046901	45051901	ENSG00000257319.1	DBX2-AS1	+	45050901	lncRNA	31.7909	-2.63639	0.491959	-5.35896	8.37042e-08	4.50756e-06
chr8	141967841	141972841	ENSG00000254183.1	ENSG00000254183	-	141968841	processed_pseudogene	92.2437	-2.63611	0.460149	-5.72882	1.01135e-08	6.76982e-07
chr17	2049380	2054380	ENSG00000267195.1	MIR212	-	2050380	miRNA	18.9637	-2.63594	0.751961	-3.50542	0.000455885	0.0071748
chr8	68330689	68335689	ENSG00000248801.7	C8orf34-AS1	-	68331689	lncRNA	62.6483	-2.63579	0.374255	-7.04276	1.88474e-12	3.05033e-10
chr18	6507416	6512416	ENSG00000265944.1	LINC01387	+	6511416	lncRNA	41.8927	-2.63574	0.522174	-5.04762	4.47338e-07	1.97065e-05
chr4	147476917	147481917	ENSG00000151617.17	EDNRA	+	147480917	protein_coding	40.8333	-2.63557	0.454627	-5.79722	6.74217e-09	4.74036e-07
chr14	101043901	101048901	ENSG00000216099.3	MIR889	+	101047901	miRNA	86.2849	-2.63532	0.48529	-5.43041	5.62248e-08	3.14922e-06
chr2	6495798	6500798	ENSG00000231610.1	PIK3CDP1	-	6496798	processed_pseudogene	36.8864	-2.63502	0.553048	-4.76455	1.8928e-06	6.89759e-05
chr11	114055041	114060041	ENSG00000109906.15	ZBTB16	+	114059041	protein_coding	109.351	-2.63479	0.3948	-6.67373	2.49374e-11	3.15895e-09
chr5	159950498	159955498	ENSG00000248626.1	GAPDHP40	-	159951498	processed_pseudogene	72.094	-2.63457	0.435767	-6.04583	1.48644e-09	1.22599e-07
chr11	88044608	88049608	ENSG00000285835.1	ENSG00000285835	-	88045608	lncRNA	42.2204	-2.63389	0.464805	-5.66667	1.45601e-08	9.34024e-07
chrX	54219324	54224324	ENSG00000234566.1	RPL7AP71	+	54223324	processed_pseudogene	2.93235	-2.63371	1.85508	-1.41973	0.155686	NA
chr11	134408284	134413284	ENSG00000255545.8	B3GAT1-DT	+	134412284	lncRNA	38.7808	-2.63359	0.521996	-5.04523	4.52973e-07	1.99109e-05
chr21	41535206	41540206	ENSG00000207503.1	ENSG00000207503	+	41539206	snoRNA	52.0745	-2.63284	0.460534	-5.71693	1.08465e-08	7.19634e-07
chr17	778353	783353	ENSG00000171861.11	MRM3	+	782353	protein_coding	3.94933	-2.63176	1.62113	-1.62341	0.104502	NA
chr12	126719412	126724412	ENSG00000189238.6	LINC00943	+	126723412	lncRNA	31.917	-2.63166	0.563383	-4.67117	2.99489e-06	0.000102465
chr19	53717076	53722076	ENSG00000207837.1	MIR517B	+	53721076	miRNA	50.1591	-2.63098	0.564272	-4.6626	3.12242e-06	0.000106222
chr11	96505826	96510826	ENSG00000255679.1	JRKL-AS1	-	96506826	lncRNA	76.8222	-2.63072	0.414411	-6.34809	2.18003e-10	2.21485e-08
chr8	85778090	85783090	ENSG00000276998.1	REXO1L2P	-	85779090	processed_pseudogene	263.902	-2.63007	0.302961	-8.68122	3.91558e-18	2.17692e-15
chr22	49723506	49728506	ENSG00000226954.1	ENSG00000226954	-	49724506	lncRNA	75.612	-2.63005	0.403235	-6.52236	6.92085e-11	7.9003e-09
chr12	102196833	102201833	ENSG00000183395.5	PMCH	-	102197833	protein_coding	4.62344	-2.63001	1.60793	-1.63565	0.101913	0.294834
chr11	133060697	133065697	ENSG00000279711.1	ENSG00000279711	+	133064697	TEC	60.326	-2.62917	0.418989	-6.27503	3.49563e-10	3.33161e-08
chr13	105504681	105509681	ENSG00000232307.1	DAOA-AS1	-	105505681	lncRNA	22.6443	-2.62912	0.566433	-4.64153	3.45837e-06	0.000116398
chr2	5067437	5072437	ENSG00000289300.2	ENSG00000289300	+	5071437	lncRNA	40.7476	-2.62718	0.577208	-4.55153	5.32573e-06	0.000168659
chr10	3393505	3398505	ENSG00000286610.1	ENSG00000286610	+	3397505	lncRNA	71.3272	-2.62604	0.440059	-5.96749	2.40936e-09	1.87393e-07
chr2	130225379	130230379	ENSG00000213225.7	NOC2LP1	+	130229379	transcribed_processed_pseudogene	49.4487	-2.62569	0.47791	-5.49411	3.92691e-08	2.26937e-06
chr9	136518626	136523626	ENSG00000263403.1	MIR4673	-	136519626	miRNA	3.23646	-2.62567	1.76712	-1.48584	0.137321	NA
chr2	219903923	219908923	ENSG00000228909.2	LINC01803	-	219904923	lncRNA	45.6346	-2.62444	0.465135	-5.64232	1.67774e-08	1.05817e-06
chr1	5770453	5775453	ENSG00000289893.1	ENSG00000289893	-	5771453	lncRNA	49.5698	-2.62444	0.476446	-5.50836	3.62186e-08	2.12374e-06
chr20	53093652	53098652	ENSG00000199218.1	RN7SKP184	+	53097652	misc_RNA	26.6184	-2.62395	0.650479	-4.03387	5.48645e-05	0.0012569
chr1	20185518	20190518	ENSG00000187980.7	PLA2G2C	-	20186518	protein_coding	109.758	-2.6235	0.385671	-6.80242	1.02877e-11	1.41354e-09
chr5	179846130	179851130	ENSG00000252202.1	Y_RNA	-	179847130	misc_RNA	5.96958	-2.62315	1.55824	-1.6834	0.0922979	0.278755
chr14	101044658	101049658	ENSG00000207587.1	MIR544A	+	101048658	miRNA	85.7691	-2.62162	0.453049	-5.78661	7.18197e-09	5.01691e-07
chr22	29716003	29721003	ENSG00000100314.4	CABP7	+	29720003	protein_coding	47.2567	-2.62108	0.46453	-5.64244	1.67655e-08	1.05817e-06
chr11	124093532	124098532	ENSG00000186268.4	OR10D4P	-	124094532	unprocessed_pseudogene	57.7581	-2.61884	0.449371	-5.82779	5.61654e-09	4.01475e-07
chr1	55035447	55040447	ENSG00000169174.11	PCSK9	+	55039447	protein_coding	139.667	-2.61785	0.366292	-7.14688	8.87711e-13	1.54498e-10
chr11	101580295	101585295	ENSG00000254506.1	ENSG00000254506	+	101584295	transcribed_processed_pseudogene	28.2824	-2.6177	0.580166	-4.51199	6.42217e-06	0.000198258
chr9	137237287	137242287	ENSG00000188229.6	TUBB4B	+	137241287	protein_coding	4.93776	-2.6172	1.51758	-1.72459	0.0846007	0.264911
chr6	49712590	49717590	ENSG00000124490.14	CRISP2	-	49713590	protein_coding	28.9065	-2.61709	0.621811	-4.20881	2.56714e-05	0.000652866
chr16	83725377	83730377	ENSG00000259914.1	ENSG00000259914	-	83726377	lncRNA	37.7067	-2.61588	0.528025	-4.95408	7.26739e-07	3.00319e-05
chr7	149996752	150001752	ENSG00000260555.1	ENSG00000260555	+	150000752	lncRNA	44.386	-2.61584	0.48489	-5.3947	6.86376e-08	3.80542e-06
chr4	46474230	46479230	ENSG00000151834.16	GABRA2	-	46475230	protein_coding	22.1988	-2.61526	0.685081	-3.81745	0.000134839	0.00265017
chr16	55482618	55487618	ENSG00000279030.1	ENSG00000279030	+	55486618	TEC	27.3331	-2.61482	0.672197	-3.88996	0.000100263	0.00208287
chr22	48140001	48145001	ENSG00000238192.1	ENSG00000238192	-	48141001	lncRNA	83.5177	-2.61412	0.509414	-5.13162	2.87261e-07	1.33956e-05
chrX	1211723	1216723	ENSG00000205755.12	CRLF2	-	1212723	protein_coding	19.1469	-2.61402	0.685121	-3.81541	0.000135955	0.00266773
chr13	92480606	92485606	ENSG00000236240.1	GPC5-IT1	+	92484606	lncRNA	18.7404	-2.61397	0.777717	-3.36109	0.000776368	0.0109634
chr19	17005189	17010189	ENSG00000268985.1	ENSG00000268985	+	17009189	lncRNA	29.8429	-2.61377	0.527055	-4.9592	7.07826e-07	2.93311e-05
chr4	73736519	73741519	ENSG00000169429.12	CXCL8	+	73740519	protein_coding	40.0462	-2.61375	0.513964	-5.08546	3.66729e-07	1.65314e-05
chr2	165790851	165795851	ENSG00000235192.1	ENSG00000235192	+	165794851	lncRNA	47.6978	-2.61273	0.411332	-6.35188	2.12704e-10	2.17116e-08
chrX	12863072	12868072	ENSG00000196664.5	TLR7	+	12867072	protein_coding	39.11	-2.61248	0.495002	-5.27771	1.30805e-07	6.60004e-06
chr5	5684805	5689805	ENSG00000286986.1	ENSG00000286986	+	5688805	lncRNA	67.685	-2.61215	0.45641	-5.72326	1.04502e-08	6.96414e-07
chr12	131291522	131296522	ENSG00000279746.1	ENSG00000279746	+	131295522	TEC	56.2165	-2.61178	0.431235	-6.05651	1.39107e-09	1.15134e-07
chr13	109781831	109786831	ENSG00000275741.1	ENSG00000275741	+	109785831	lncRNA	2.64455	-2.61165	1.89352	-1.37926	0.167816	NA
chr9	128551414	128556414	ENSG00000228395.3	ENSG00000228395	-	128552414	lncRNA	4.79871	-2.61017	1.61701	-1.61419	0.106485	0.302408
chr4	9075023	9080023	ENSG00000249767.1	ENPP7P10	+	9079023	unprocessed_pseudogene	28.9847	-2.60943	0.665674	-3.91998	8.8556e-05	0.00187425
chr2	161405554	161410554	ENSG00000271924.1	RNA5SP108	+	161409554	rRNA_pseudogene	6.43576	-2.60907	1.46523	-1.78065	0.0749695	0.246022
chr6	39788298	39793298	ENSG00000146122.17	DAAM2	+	39792298	protein_coding	40.066	-2.60772	0.521936	-4.99623	5.84609e-07	2.4966e-05
chr20	19208642	19213642	ENSG00000185052.13	SLC24A3	+	19212642	protein_coding	90.6822	-2.60668	0.489847	-5.32142	1.02962e-07	5.39271e-06
chr17	49496800	49501800	ENSG00000279036.1	ENSG00000279036	-	49497800	TEC	57.8284	-2.60656	0.424558	-6.13947	8.27964e-10	7.21543e-08
chr3	68496613	68501613	ENSG00000286967.1	ENSG00000286967	+	68500613	lncRNA	18.9569	-2.60654	0.75392	-3.45732	0.000545573	0.00829746
chr18	74239555	74244555	ENSG00000260569.2	ENSG00000260569	-	74240555	lncRNA	91.1	-2.60653	0.410982	-6.3422	2.26504e-10	2.28191e-08
chr19	51416803	51421803	ENSG00000142512.15	SIGLEC10	-	51417803	protein_coding	51.2557	-2.60615	0.436037	-5.97692	2.27399e-09	1.78018e-07
chr16	56190118	56195118	ENSG00000246379.8	GNAO1-DT	-	56191118	lncRNA	17.9582	-2.60486	0.666499	-3.90828	9.29555e-05	0.00195291
chr7	73038	78038	ENSG00000242611.2	ENSG00000242611	+	77038	lncRNA	42.1973	-2.6048	0.466794	-5.58019	2.40258e-08	1.45571e-06
chr2	226831581	226836581	ENSG00000144468.17	RHBDD1	+	226835581	protein_coding	38.8923	-2.6027	0.537349	-4.8436	1.27507e-06	4.91399e-05
chr17	72219948	72224948	ENSG00000288605.1	ENSG00000288605	-	72220948	lncRNA	41.2172	-2.60227	0.633462	-4.10801	3.99084e-05	0.000955065
chr5	54879635	54884635	ENSG00000289060.1	ENSG00000289060	+	54883635	lncRNA	45.5554	-2.60108	0.570928	-4.55588	5.21678e-06	0.000165821
chr16	29263479	29268479	ENSG00000260953.1	ENSG00000260953	-	29264479	lncRNA	41.3475	-2.60084	0.502533	-5.17547	2.27339e-07	1.0825e-05
chrX	22995960	23000960	ENSG00000184735.7	DDX53	+	22999960	protein_coding	15.7533	-2.59968	0.811006	-3.2055	0.00134827	0.0168062
chr2	199070791	199075791	ENSG00000231557.1	ENSG00000231557	-	199071791	lncRNA	38.9599	-2.59922	0.494446	-5.25684	1.46554e-07	7.33308e-06
chr13	18404806	18409806	ENSG00000268486.5	ENSG00000268486	+	18408806	transcribed_unprocessed_pseudogene	1.89895	-2.59905	2.17858	-1.193	0.23287	NA
chr1	5492057	5497057	ENSG00000284692.2	ENSG00000284692	-	5493057	lncRNA	100.402	-2.5987	0.402185	-6.46146	1.03696e-10	1.12592e-08
chr16	33027037	33032037	ENSG00000261259.1	ENSG00000261259	-	33028037	transcribed_processed_pseudogene	42.2578	-2.59844	0.486659	-5.33935	9.32816e-08	4.96542e-06
chr8	143598541	143603541	ENSG00000104529.19	EEF1D	-	143599541	protein_coding	4.42907	-2.59749	1.50912	-1.7212	0.0852147	0.266075
chr9	137085817	137090817	ENSG00000268996.3	MAN1B1-DT	-	137086817	lncRNA	5.10616	-2.59725	1.507	-1.72346	0.0848059	0.265282
chr11	70705068	70710068	ENSG00000280089.1	ENSG00000280089	-	70706068	TEC	30.4108	-2.59655	0.578583	-4.48777	7.19736e-06	0.000219481
chr9	137294721	137299721	ENSG00000260996.1	ENSG00000260996	-	137295721	lncRNA	5.27262	-2.59531	1.49162	-1.73993	0.0818715	0.259872
chr16	30350665	30355665	ENSG00000260219.4	CD2BP2-DT	+	30354665	lncRNA	5.66617	-2.59481	1.4875	-1.74441	0.081087	0.258459
chrX	134792395	134797395	ENSG00000156500.16	PABIR3	+	134796395	protein_coding	4.04286	-2.59461	1.67944	-1.54493	0.122363	0.32702
chrX	53318990	53323990	ENSG00000226299.2	RPSAP62	+	53322990	processed_pseudogene	37.5111	-2.59387	0.51861	-5.00157	5.68641e-07	2.43534e-05
chrX	154770998	154775998	ENSG00000206693.1	SNORA56	+	154774998	snoRNA	2.42298	-2.59382	2.09154	-1.24015	0.214919	NA
chr16	10181928	10186928	ENSG00000183454.18	GRIN2A	-	10182928	protein_coding	73.9889	-2.59378	0.438419	-5.91621	3.29454e-09	2.48514e-07
chr19	10285952	10290952	ENSG00000105376.5	ICAM5	+	10289952	protein_coding	6.35165	-2.59355	1.4777	-1.75513	0.0792371	0.254682
chr11	64642399	64647399	ENSG00000237410.1	NRXN2-AS1	+	64646399	lncRNA	20.9604	-2.59305	0.65179	-3.97835	6.93958e-05	0.00153191
chrX	52796427	52801427	ENSG00000204363.5	SPANXN5	-	52797427	protein_coding	57.6232	-2.59303	0.460035	-5.63658	1.73458e-08	1.08944e-06
chrX	118970614	118975614	ENSG00000175556.17	LONRF3	+	118974614	protein_coding	38.3016	-2.5924	0.488097	-5.31125	1.08878e-07	5.65038e-06
chr1	11979127	11984127	ENSG00000287384.1	ENSG00000287384	-	11980127	lncRNA	5.86716	-2.59151	1.46179	-1.77284	0.0762554	0.248585
chr9	83059398	83064398	ENSG00000286451.1	ENSG00000286451	+	83063398	lncRNA	52.926	-2.59132	0.480743	-5.39023	7.03663e-08	3.89049e-06
chr9	90797787	90802787	ENSG00000165025.15	SYK	+	90801787	protein_coding	70.3521	-2.59113	0.486787	-5.32292	1.02115e-07	5.35963e-06
chr15	41833775	41838775	ENSG00000243708.11	PLA2G4B	+	41837775	protein_coding	4.90451	-2.59042	1.63157	-1.58768	0.112358	0.311714
chr2	218876852	218881852	ENSG00000135925.9	WNT10A	+	218880852	protein_coding	29.6549	-2.59013	0.566103	-4.57537	4.75371e-06	0.000153368
chr1	77416325	77421325	ENSG00000251767.1	RNU7-8P	+	77420325	snRNA	85.1328	-2.58995	0.435814	-5.94278	2.80224e-09	2.15439e-07
chr2	232350309	232355309	ENSG00000230122.1	ECEL1P3	-	232351309	unprocessed_pseudogene	24.5929	-2.5897	0.653973	-3.95995	7.49649e-05	0.00162968
chr19	9082398	9087398	ENSG00000267154.1	OR1M4P	-	9083398	unprocessed_pseudogene	39.6631	-2.58951	0.545213	-4.74954	2.03881e-06	7.3746e-05
chr14	23557097	23562097	ENSG00000258727.1	AP1G2-AS1	+	23561097	lncRNA	5.51863	-2.58943	1.62057	-1.59786	0.110075	0.308157
chr16	7050233	7055233	ENSG00000289107.1	ENSG00000289107	+	7054233	lncRNA	23.493	-2.58849	0.667039	-3.88057	0.000104214	0.00215179
chr14	105912237	105917237	ENSG00000233655.1	IGHD4-4	-	105913237	IG_D_gene	53.4118	-2.5884	0.490105	-5.28133	1.28251e-07	6.49847e-06
chr3	64007964	64012964	ENSG00000243410.1	PSMD6-AS1	+	64011964	lncRNA	6.58468	-2.58803	1.60501	-1.61247	0.106859	0.302866
chr14	105862258	105867258	ENSG00000211900.2	IGHJ6	-	105863258	IG_J_gene	36.8558	-2.58669	0.560504	-4.61494	3.93213e-06	0.000129868
chr12	131231511	131236511	ENSG00000280217.1	ENSG00000280217	+	131235511	TEC	49.3666	-2.5866	0.482625	-5.35943	8.34861e-08	4.49986e-06
chr8	138059268	138064268	ENSG00000253988.1	ENSG00000253988	+	138063268	lncRNA	47.1358	-2.58656	0.485276	-5.33008	9.8169e-08	5.18422e-06
chr14	105883888	105888888	ENSG00000227196.1	IGHD4-23	-	105884888	IG_D_gene	60.866	-2.58621	0.488164	-5.29783	1.17186e-07	5.99857e-06
chrX	135731197	135736197	ENSG00000233861.1	MGAT2P1	-	135732197	processed_pseudogene	20.021	-2.58575	0.62824	-4.11586	3.85739e-05	0.000927566
chr20	61270827	61275827	ENSG00000286232.1	ENSG00000286232	-	61271827	lncRNA	29.481	-2.58535	0.569862	-4.5368	5.71145e-06	0.0001788
chr6	31157238	31162238	ENSG00000204536.15	CCHCR1	-	31158238	protein_coding	5.32374	-2.58534	1.57554	-1.64092	0.100814	0.293093
chr1	241356374	241361374	ENSG00000182901.18	RGS7	-	241357374	protein_coding	26.5893	-2.58513	0.643714	-4.01596	5.92035e-05	0.00133841
chr2	106537079	106542079	ENSG00000231505.1	ENSG00000231505	-	106538079	lncRNA	61.4374	-2.58468	0.471805	-5.47828	4.29489e-08	2.46542e-06
chrX	114580078	114585078	ENSG00000147246.10	HTR2C	+	114584078	protein_coding	13.4037	-2.58401	0.745366	-3.46677	0.000526754	0.00807053
chr5	57319020	57324020	ENSG00000248586.2	ENSG00000248586	-	57320020	processed_pseudogene	75.3356	-2.58372	0.474551	-5.44456	5.19334e-08	2.93073e-06
chr22	26168341	26173341	ENSG00000229770.2	ENSG00000229770	-	26169341	lncRNA	76.0916	-2.58326	0.394857	-6.54226	6.05942e-11	7.02378e-09
chrX	103275750	103280750	ENSG00000204065.3	TCEAL5	-	103276750	protein_coding	53.8724	-2.58085	0.436194	-5.91674	3.28392e-09	2.48024e-07
chr6	33008591	33013591	ENSG00000204252.14	HLA-DOA	-	33009591	protein_coding	67.175	-2.58013	0.408579	-6.31489	2.70362e-10	2.66562e-08
chr8	55141358	55146358	ENSG00000253976.1	ENSG00000253976	-	55142358	lncRNA	41.7593	-2.5801	0.528269	-4.88406	1.03925e-06	4.13799e-05
chr4	7188538	7193538	ENSG00000184985.16	SORCS2	+	7192538	protein_coding	121.018	-2.57793	0.362585	-7.10986	1.16159e-12	1.95368e-10
chr19	41215223	41220223	ENSG00000167601.12	AXL	+	41219223	protein_coding	45.7568	-2.57762	0.435488	-5.91892	3.24057e-09	2.45059e-07
chr3	151460061	151465061	ENSG00000152580.9	IGSF10	-	151461061	protein_coding	74.977	-2.57723	0.364179	-7.07682	1.47502e-12	2.43313e-10
chr11	112957247	112962247	ENSG00000149294.17	NCAM1	+	112961247	protein_coding	63.8569	-2.57659	0.437572	-5.88839	3.89974e-09	2.89797e-07
chr8	41267431	41272431	ENSG00000239281.2	RPS29P2	+	41271431	processed_pseudogene	23.6018	-2.57609	0.652989	-3.94507	7.97754e-05	0.00172088
chr20	63128459	63133459	ENSG00000260416.1	ENSG00000260416	-	63129459	lncRNA	48.9334	-2.57585	0.531185	-4.84925	1.23927e-06	4.79452e-05
chr1	13513003	13518003	ENSG00000162494.6	LRRC38	-	13514003	protein_coding	62.8146	-2.57574	0.411343	-6.26177	3.80622e-10	3.60475e-08
chr8	54522297	54527297	ENSG00000226098.4	SEC11B	-	54523297	processed_pseudogene	55.4715	-2.57533	0.507965	-5.0699	3.98033e-07	1.77296e-05
chr2	131365785	131370785	ENSG00000227275.1	MTND6P10	+	131369785	unprocessed_pseudogene	39.5232	-2.57475	0.517061	-4.97959	6.37181e-07	2.67919e-05
chr16	12897598	12902598	ENSG00000237515.9	SHISA9	+	12901598	protein_coding	22.4174	-2.57379	0.634591	-4.05583	4.99571e-05	0.0011604
chr8	4783332	4788332	ENSG00000254244.1	PAICSP4	+	4787332	processed_pseudogene	40.1145	-2.57364	0.519378	-4.95524	7.22396e-07	2.99142e-05
chr2	3703153	3708153	ENSG00000224661.1	ENSG00000224661	-	3704153	lncRNA	45.8415	-2.57343	0.479062	-5.37181	7.79494e-08	4.23187e-06
chr19	56101416	56106416	ENSG00000223060.1	Y_RNA	+	56105416	misc_RNA	6.41805	-2.5732	1.84202	-1.39695	0.162429	0.384957
chr2	129988889	129993889	ENSG00000217289.3	ENSG00000217289	+	129992889	processed_pseudogene	59.0744	-2.57286	0.480496	-5.3546	8.57451e-08	4.60508e-06
chr22	40818399	40823399	ENSG00000100372.15	SLC25A17	-	40819399	protein_coding	4.22515	-2.57198	1.37691	-1.86794	0.0617709	0.219077
chr2	35724142	35729142	ENSG00000234587.1	MRPL50P1	-	35725142	processed_pseudogene	50.521	-2.57123	0.512974	-5.01239	5.37586e-07	2.31721e-05
chr11	103845906	103850906	ENSG00000264200.1	MIR4693	+	103849906	miRNA	43.1862	-2.5711	0.50278	-5.11378	3.15776e-07	1.44626e-05
chr12	85563878	85568878	ENSG00000257855.1	ENSG00000257855	+	85567878	processed_pseudogene	26.9404	-2.571	0.571507	-4.49864	6.83912e-06	0.000209835
chr7	150029653	150034653	ENSG00000241449.6	ENSG00000241449	+	150033653	lncRNA	40.4912	-2.57096	0.50553	-5.08566	3.66341e-07	1.65264e-05
chr1	26406817	26411817	ENSG00000131914.11	LIN28A	+	26410817	protein_coding	61.4367	-2.56997	0.413052	-6.22191	4.91146e-10	4.50235e-08
chr11	3217813	3222813	ENSG00000182170.3	MRGPRG	-	3218813	protein_coding	102.049	-2.5682	0.34337	-7.47939	7.46688e-14	1.60696e-11
chr14	105857242	105862242	ENSG00000263413.2	MIR4538	-	105858242	miRNA	36.5148	-2.56811	0.584279	-4.39535	1.10595e-05	0.000317428
chr9	137891570	137896570	ENSG00000203987.3	ENSG00000203987	-	137892570	lncRNA	64.4037	-2.56805	0.491557	-5.22432	1.748e-07	8.55392e-06
chr6	47819390	47824390	ENSG00000200340.1	RNU1-105P	+	47823390	snRNA	60.4533	-2.56738	0.51951	-4.94192	7.73575e-07	3.16407e-05
chr8	22152913	22157913	ENSG00000168484.13	SFTPC	+	22156913	protein_coding	73.2433	-2.56729	0.406814	-6.31073	2.77721e-10	2.72921e-08
chr22	26899292	26904292	ENSG00000235271.6	ENSG00000235271	+	26903292	lncRNA	50.1314	-2.56726	0.461902	-5.55803	2.72841e-08	1.63661e-06
chrX	5165512	5170512	ENSG00000226313.1	MTCYBP12	+	5169512	processed_pseudogene	31.047	-2.56721	0.597118	-4.29933	1.71317e-05	0.000461903
chr8	85729419	85734419	ENSG00000275928.2	REXO1L11P	+	85733419	processed_pseudogene	267.279	-2.56643	0.336271	-7.63203	2.31086e-14	5.59489e-12
chr11	89816082	89821082	ENSG00000250946.2	ENSG00000250946	+	89820082	unprocessed_pseudogene	46.167	-2.5664	0.540363	-4.74941	2.0401e-06	7.37481e-05
chr8	81482236	81487236	ENSG00000170323.9	FABP4	-	81483236	protein_coding	21.2143	-2.56562	0.639556	-4.01156	6.03181e-05	0.001359
chr7	121685363	121690363	ENSG00000227743.2	ENSG00000227743	-	121686363	lncRNA	32.3357	-2.56543	0.602486	-4.25807	2.06197e-05	0.000539473
chr7	33873231	33878231	ENSG00000233219.1	ENSG00000233219	-	33874231	lncRNA	41.9821	-2.56344	0.552963	-4.63582	3.55517e-06	0.000118989
chr16	32440159	32445159	ENSG00000260307.2	PABPC1P13	-	32441159	processed_pseudogene	16.3045	-2.56326	0.807467	-3.17445	0.0015012	0.0182662
chr14	86328376	86333376	ENSG00000258994.1	LINC02309	+	86332376	lncRNA	45.1535	-2.56319	0.513978	-4.98695	6.13387e-07	2.59734e-05
chr18	6373425	6378425	ENSG00000283532.1	MIR4317	-	6374425	miRNA	43.6694	-2.56223	0.576135	-4.44728	8.6966e-06	0.000258121
chr2	8484420	8489420	ENSG00000285591.1	ENSG00000285591	+	8488420	lncRNA	43.1005	-2.56201	0.521814	-4.90981	9.11625e-07	3.66874e-05
chr2	130272507	130277507	ENSG00000232990.2	MTATP6P7	+	130276507	unprocessed_pseudogene	63.1278	-2.56103	0.457109	-5.60266	2.11086e-08	1.29331e-06
chr12	129839522	129844522	ENSG00000280196.1	ENSG00000280196	-	129840522	TEC	42.5965	-2.56099	0.545514	-4.69464	2.67075e-06	9.30178e-05
chr16	562995	567995	ENSG00000007541.17	PIGQ	+	566995	protein_coding	14.7866	-2.56089	0.818973	-3.12696	0.00176625	0.020661
chr16	563005	568005	ENSG00000257108.2	NHLRC4	+	567005	protein_coding	14.6534	-2.56086	0.817853	-3.13119	0.00174097	0.0204506
chr11	49898186	49903186	ENSG00000254408.1	OR4A1P	-	49899186	unprocessed_pseudogene	20.1453	-2.56055	0.770435	-3.32351	0.00088891	0.0121816
chr11	89956422	89961422	ENSG00000254655.1	ENSG00000254655	+	89960422	processed_pseudogene	54.9354	-2.56031	0.445211	-5.75079	8.88252e-09	6.01288e-07
chr12	71435798	71440798	ENSG00000139292.13	LGR5	+	71439798	protein_coding	103.875	-2.56015	0.488961	-5.2359	1.64185e-07	8.12721e-06
chr1	209671412	209676412	ENSG00000123689.6	G0S2	+	209675412	protein_coding	132.563	-2.55829	0.382978	-6.68001	2.38931e-11	3.04594e-09
chr2	1820412	1825412	ENSG00000232057.1	ENSG00000232057	+	1824412	lncRNA	45.0664	-2.55788	0.482448	-5.30189	1.1461e-07	5.87673e-06
chr18	77649973	77654973	ENSG00000286727.1	ENSG00000286727	-	77650973	lncRNA	40.4427	-2.55696	0.526507	-4.85645	1.19507e-06	4.65954e-05
chr11	43574889	43579889	ENSG00000283341.4	ENSG00000283341	+	43578889	lncRNA	83.9672	-2.55551	0.421678	-6.06033	1.35843e-09	1.12659e-07
chrX	104035956	104040956	ENSG00000101812.15	H2BW2	+	104039956	protein_coding	18.0849	-2.55438	0.689657	-3.70384	0.000212357	0.00386856
chr2	218955666	218960666	ENSG00000171450.6	CDK5R2	+	218959666	protein_coding	45.6681	-2.55415	0.453976	-5.62618	1.84248e-08	1.15119e-06
chr12	1816267	1821267	ENSG00000166159.11	LRTM2	+	1820267	protein_coding	80.8952	-2.55273	0.419066	-6.09147	1.11881e-09	9.42188e-08
chr14	101042455	101047455	ENSG00000207754.3	MIR487B	+	101046455	miRNA	61.839	-2.55237	0.534059	-4.77919	1.76004e-06	6.46358e-05
chrX	26744029	26749029	ENSG00000236683.3	HMGA1P1	+	26748029	processed_pseudogene	20.8432	-2.55193	0.790468	-3.22838	0.00124495	0.0158071
chr2	204472837	204477837	ENSG00000236634.1	ENSG00000236634	-	204473837	lncRNA	61.9045	-2.55163	0.42488	-6.00554	1.90692e-09	1.5287e-07
chr14	28485910	28490910	ENSG00000240179.1	RPL26P3	+	28489910	processed_pseudogene	22.5077	-2.54967	0.84281	-3.0252	0.00248473	0.0266149
chr17	81800132	81805132	ENSG00000215644.10	GCGR	+	81804132	protein_coding	91.2898	-2.54954	0.367013	-6.94673	3.7386e-12	5.66869e-10
chr2	219357983	219362983	ENSG00000232789.1	ENSG00000232789	-	219358983	unprocessed_pseudogene	88.0634	-2.54905	0.449963	-5.66502	1.47011e-08	9.4106e-07
chrX	143429042	143434042	ENSG00000235539.1	MTND1P33	+	143433042	processed_pseudogene	7.30753	-2.54865	1.15753	-2.20181	0.0276791	0.13311
chr2	12029372	12034372	ENSG00000238503.1	SNORD18	-	12030372	snoRNA	49.2394	-2.54834	0.44087	-5.78027	7.45824e-09	5.15925e-07
chr19	51438379	51443379	ENSG00000269181.1	ENSG00000269181	+	51442379	processed_pseudogene	79.9649	-2.54752	0.455714	-5.59017	2.26843e-08	1.38e-06
chr10	35897963	35902963	ENSG00000227313.1	LINC02630	-	35898963	lncRNA	33.0758	-2.54734	0.524997	-4.8521	1.2216e-06	4.74757e-05
chr12	127618447	127623447	ENSG00000199584.1	Y_RNA	-	127619447	misc_RNA	45.1562	-2.54646	0.529575	-4.80851	1.52061e-06	5.74597e-05
chrX	52608656	52613656	ENSG00000234792.1	ENSG00000234792	+	52612656	processed_pseudogene	32.4622	-2.54594	0.560677	-4.54083	5.60334e-06	0.000175966
chr2	106483364	106488364	ENSG00000254126.8	CD8B2	+	106487364	protein_coding	44.8987	-2.54531	0.472995	-5.38127	7.39635e-08	4.04417e-06
chr21	38117451	38122451	ENSG00000198054.12	DSCR8	+	38121451	lncRNA	32.9094	-2.54428	0.587546	-4.33035	1.4887e-05	0.000411356
chr17	44314315	44319315	ENSG00000267750.6	RUNDC3A-AS1	-	44315315	lncRNA	31.0294	-2.54406	0.548749	-4.63611	3.55031e-06	0.000118893
chr5	5175214	5180214	ENSG00000250866.1	ENSG00000250866	-	5176214	lncRNA	35.5875	-2.5435	0.528162	-4.81576	1.46644e-06	5.56126e-05
chr2	8277186	8282186	ENSG00000235665.6	LINC00298	-	8278186	lncRNA	64.0163	-2.54265	0.439997	-5.77879	7.52378e-09	5.19262e-07
chr17	11153455	11158455	ENSG00000243346.3	RN7SL601P	+	11157455	misc_RNA	23.7792	-2.54079	0.711357	-3.57175	0.000354602	0.00586126
chr7	170920	175920	ENSG00000239715.1	ENSG00000239715	+	174920	lncRNA	24.7796	-2.5405	0.577395	-4.39993	1.08288e-05	0.000311549
chr12	132358810	132363810	ENSG00000280150.1	ENSG00000280150	+	132362810	TEC	17.694	-2.54046	0.760493	-3.34054	0.000836152	0.0116083
chrX	52686633	52691633	ENSG00000237275.1	S100A11P10	-	52687633	processed_pseudogene	28.4576	-2.53934	0.598973	-4.23948	2.24034e-05	0.000578824
chr3	2131757	2136757	ENSG00000286363.1	ENSG00000286363	+	2135757	lncRNA	39.0462	-2.53908	0.549827	-4.61796	3.87523e-06	0.000128342
chr14	105886084	105891084	ENSG00000244620.1	ENSG00000244620	+	105890084	lncRNA	64.9027	-2.53859	0.428058	-5.93049	3.02035e-09	2.3073e-07
chrX	107268582	107273582	ENSG00000204053.6	MYCLP1	+	107272582	processed_pseudogene	25.3337	-2.5379	0.587333	-4.32105	1.55287e-05	0.000426339
chr17	2747182	2752182	ENSG00000221200.1	MIR1253	-	2748182	miRNA	60.8505	-2.53767	0.426002	-5.95693	2.57019e-09	1.99128e-07
chr21	5018531	5023531	ENSG00000277117.6	ENSG00000277117	+	5022531	artifact	38.6553	-2.53766	0.574547	-4.4168	1.00173e-05	0.000291415
chr17	59151732	59156732	ENSG00000068489.13	PRR11	+	59155732	protein_coding	7.11766	-2.53729	1.1766	-2.15646	0.0310478	0.142974
chr8	29349684	29354684	ENSG00000120875.9	DUSP4	-	29350684	protein_coding	43.2932	-2.5371	0.465949	-5.44501	5.18031e-08	2.92612e-06
chr11	131230538	131235538	ENSG00000237612.1	ENSG00000237612	+	131234538	lncRNA	56.6089	-2.53509	0.476674	-5.3183	1.04739e-07	5.45915e-06
chr11	122980834	122985834	ENSG00000188909.5	BSX	-	122981834	protein_coding	103.255	-2.53484	0.391021	-6.48261	9.01476e-11	9.95004e-09
chr8	56207686	56212686	ENSG00000170791.18	CHCHD7	+	56211686	protein_coding	31.1964	-2.53479	0.567829	-4.46401	8.04411e-06	0.000241379
chr21	41530116	41535116	ENSG00000184012.14	TMPRSS2	-	41531116	protein_coding	46.2133	-2.53416	0.514321	-4.92719	8.34214e-07	3.38215e-05
chr3	190164523	190169523	ENSG00000212489.1	RNU6-1109P	-	190165523	snRNA	41.0847	-2.53398	0.606677	-4.17682	2.95619e-05	0.000736521
chr6	71550643	71555643	ENSG00000219575.1	ENSG00000219575	-	71551643	processed_pseudogene	32.8872	-2.53314	0.515027	-4.91845	8.723e-07	3.51992e-05
chr10	3463704	3468704	ENSG00000289994.1	ENSG00000289994	+	3467704	lncRNA	54.1748	-2.53146	0.524784	-4.82382	1.40833e-06	5.36219e-05
chr10	4677216	4682216	ENSG00000231298.8	MANCR	-	4678216	lncRNA	50.3264	-2.53106	0.488535	-5.18092	2.20798e-07	1.05387e-05
chrX	139358040	139363040	ENSG00000173954.8	SNURFL	+	139362040	processed_pseudogene	18.8698	-2.52828	0.608753	-4.15321	3.27841e-05	0.000807088
chrX	103910352	103915352	ENSG00000234345.2	ELF2P1	-	103911352	processed_pseudogene	6.51662	-2.52802	1.22179	-2.06911	0.0385353	0.163244
chr12	132356734	132361734	ENSG00000279023.1	ENSG00000279023	+	132360734	TEC	36.2768	-2.5272	0.559577	-4.51628	6.29365e-06	0.000194591
chrX	147236027	147241027	ENSG00000207589.1	MIR508	-	147237027	miRNA	12.9528	-2.52704	0.86384	-2.92535	0.00344066	0.0335964
chr10	125472932	125477932	ENSG00000233135.1	RPS27P18	-	125473932	unprocessed_pseudogene	83.6298	-2.52689	0.39774	-6.35312	2.10998e-10	2.16229e-08
chr1	237038184	237043184	ENSG00000198626.18	RYR2	+	237042184	protein_coding	78.6116	-2.5267	0.443095	-5.70239	1.18142e-08	7.79529e-07
chr16	29107108	29112108	ENSG00000260908.1	ENSG00000260908	-	29108108	transcribed_unprocessed_pseudogene	81.6604	-2.52601	0.404787	-6.24035	4.36592e-10	4.05174e-08
chr2	131551007	131556007	ENSG00000286208.1	ENSG00000286208	+	131555007	lncRNA	71.9712	-2.52462	0.427882	-5.90027	3.62912e-09	2.71705e-07
chr14	105862465	105867465	ENSG00000237111.1	IGHJ3P	-	105863465	IG_J_pseudogene	34.3255	-2.52444	0.583707	-4.32484	1.52644e-05	0.000420529
chr14	72543622	72548622	ENSG00000286333.1	ENSG00000286333	-	72544622	lncRNA	66.9052	-2.5241	0.438646	-5.7543	8.70005e-09	5.92274e-07
chr1	28808170	28813170	ENSG00000116329.12	OPRD1	+	28812170	protein_coding	79.2913	-2.52353	0.389783	-6.47418	9.53264e-11	1.04831e-08
chr5	121612247	121617247	ENSG00000213661.3	ENSG00000213661	+	121616247	processed_pseudogene	42.5874	-2.52311	0.536653	-4.70158	2.58159e-06	9.04364e-05
chr11	102797160	102802160	ENSG00000196611.6	MMP1	-	102798160	protein_coding	62.1421	-2.52237	0.496403	-5.0813	3.74858e-07	1.68473e-05
chr22	21366064	21371064	ENSG00000226534.1	ENSG00000226534	+	21370064	processed_pseudogene	6.39395	-2.52185	1.25933	-2.00253	0.0452277	0.180371
chr9	112754	117754	ENSG00000231808.2	LINC01388	-	113754	lncRNA	30.2394	-2.52124	0.521554	-4.8341	1.33749e-06	5.12496e-05
chr7	153747986	153752986	ENSG00000287744.1	ENSG00000287744	-	153748986	lncRNA	45.3677	-2.52113	0.50937	-4.94951	7.44002e-07	3.05979e-05
chr14	106472000	106477000	ENSG00000283195.1	IGHVII-43-1	-	106473000	IG_V_pseudogene	36.2241	-2.52097	0.542502	-4.64692	3.36922e-06	0.000114037
chr1	9197906	9202906	ENSG00000228526.8	MIR34AHG	-	9198906	lncRNA	64.76	-2.52077	0.419268	-6.01231	1.82893e-09	1.47207e-07
chr1	247412156	247417156	ENSG00000162711.18	NLRP3	+	247416156	protein_coding	89.6505	-2.52015	0.5071	-4.96973	6.70477e-07	2.79765e-05
chr19	53730877	53735877	ENSG00000283330.1	MIR518D	+	53734877	miRNA	50.7446	-2.51978	0.476774	-5.28506	1.25661e-07	6.37265e-06
chrX	22431598	22436598	ENSG00000224396.1	METTL15P3	+	22435598	processed_pseudogene	16.3591	-2.51905	0.820358	-3.07067	0.0021358	0.0237838
chr2	26558585	26563585	ENSG00000173557.15	FAM166C	+	26562585	protein_coding	80.6457	-2.51887	0.396479	-6.35309	2.11029e-10	2.16229e-08
chr10	73163	78163	ENSG00000261456.6	TUBB8	-	74163	protein_coding	6.42258	-2.5184	1.23709	-2.03574	0.041776	0.17182
chrX	137440836	137445836	ENSG00000237584.1	RAC1P4	-	137441836	processed_pseudogene	15.6781	-2.51701	0.652246	-3.85899	0.000113856	0.00231192
chr1	205038937	205043937	ENSG00000184144.12	CNTN2	+	205042937	protein_coding	124.043	-2.51563	0.328833	-7.6502	2.0067e-14	4.95845e-12
chr11	89956165	89961165	ENSG00000255360.1	ENSG00000255360	-	89957165	unprocessed_pseudogene	53.0187	-2.51547	0.452757	-5.55589	2.76193e-08	1.65012e-06
chr13	91271577	91276577	ENSG00000214178.3	PPIAP23	-	91272577	processed_pseudogene	35.4062	-2.51531	0.541952	-4.64121	3.46369e-06	0.000116447
chr16	86905472	86910472	ENSG00000260795.1	ENSG00000260795	-	86906472	processed_pseudogene	28.7857	-2.51513	0.582847	-4.31524	1.59428e-05	0.00043532
chr14	71928429	71933429	ENSG00000182732.18	RGS6	+	71932429	protein_coding	82.6795	-2.514	0.414008	-6.07236	1.26042e-09	1.05259e-07
chr6	71882550	71887550	ENSG00000079841.20	RIMS1	+	71886550	protein_coding	47.711	-2.51396	0.495817	-5.07035	3.97089e-07	1.77138e-05
chr22	48399462	48404462	ENSG00000285855.1	ENSG00000285855	+	48403462	lncRNA	72.8408	-2.51316	0.436761	-5.75408	8.71155e-09	5.92385e-07
chr3	127217473	127222473	ENSG00000287784.1	ENSG00000287784	-	127218473	lncRNA	120.521	-2.51239	0.38954	-6.44963	1.12126e-10	1.21088e-08
chr12	34245481	34250481	ENSG00000256614.1	AK6P1	+	34249481	processed_pseudogene	22.7799	-2.5123	0.653957	-3.84169	0.000122189	0.00244802
chr17	53434556	53439556	ENSG00000262518.1	ENSG00000262518	+	53438556	processed_pseudogene	12.6954	-2.51031	0.867806	-2.89271	0.0038193	0.0361371
chr11	43552436	43557436	ENSG00000283217.1	ENSG00000283217	+	43556436	lncRNA	118.42	-2.50967	0.382569	-6.56004	5.37929e-11	6.33321e-09
chr9	110595475	110600475	ENSG00000232896.1	ENSG00000232896	+	110599475	lncRNA	22.5318	-2.50964	0.725382	-3.45975	0.000540677	0.00823343
chr20	7632851	7637851	ENSG00000240584.3	RN7SL547P	-	7633851	misc_RNA	28.6812	-2.50962	0.653464	-3.84049	0.000122789	0.00245512
chr12	132196436	132201436	ENSG00000279480.1	ENSG00000279480	+	132200436	TEC	37.23	-2.50948	0.550225	-4.56082	5.0954e-06	0.000162823
chr1	2551639	2556639	ENSG00000157873.18	TNFRSF14	+	2555639	protein_coding	38.3177	-2.50922	0.524287	-4.78597	1.70162e-06	6.28752e-05
chr8	56319776	56324776	ENSG00000170786.13	SDR16C5	-	56320776	protein_coding	75.4908	-2.50913	0.442859	-5.66575	1.46387e-08	9.38064e-07
chr6	10210608	10215608	ENSG00000181355.21	OFCC1	-	10211608	transcribed_unitary_pseudogene	35.9387	-2.50887	0.52544	-4.7748	1.79883e-06	6.58994e-05
chr2	104402471	104407471	ENSG00000227157.2	ENSG00000227157	+	104406471	lncRNA	58.1054	-2.50792	0.494855	-5.06799	4.0204e-07	1.78815e-05
chr3	186109318	186114318	ENSG00000244405.8	ETV5	-	186110318	protein_coding	99.5714	-2.50755	0.362805	-6.91155	4.79376e-12	7.05481e-10
chr2	103879209	103884209	ENSG00000236141.2	ENSG00000236141	-	103880209	lncRNA	43.2107	-2.50698	0.495625	-5.05821	4.23206e-07	1.87535e-05
chr1	26042665	26047665	ENSG00000284309.1	ENSG00000284309	+	26046665	lncRNA	78.9372	-2.50695	0.401419	-6.24522	4.23202e-10	3.95191e-08
chr16	79599572	79604572	ENSG00000277214.1	ENSG00000277214	+	79603572	lncRNA	21.8419	-2.5064	0.588217	-4.26101	2.03504e-05	0.000533823
chr2	225992197	225997197	ENSG00000230621.1	ENSG00000230621	-	225993197	processed_pseudogene	39.6171	-2.50549	0.581242	-4.31057	1.62832e-05	0.000441062
chr1	78662272	78667272	ENSG00000238015.2	ENSG00000238015	+	78666272	processed_pseudogene	89.1599	-2.50422	0.500274	-5.00571	5.56569e-07	2.39388e-05
chr12	91057024	91062024	ENSG00000139330.6	KERA	-	91058024	protein_coding	39.2524	-2.50184	0.522833	-4.78517	1.70846e-06	6.30504e-05
chr7	142348819	142353819	ENSG00000282939.1	TRBV7-2	+	142352819	TR_V_gene	64.9844	-2.50138	0.45311	-5.52046	3.38123e-08	1.99041e-06
chr3	68878967	68883967	ENSG00000252828.1	RNA5SP135	+	68882967	rRNA_pseudogene	58.9478	-2.5009	0.478126	-5.23063	1.68933e-07	8.32108e-06
chr2	106995534	107000534	ENSG00000286218.2	ENSG00000286218	-	106996534	lncRNA	71.1789	-2.50088	0.438644	-5.70138	1.18839e-08	7.82406e-07
chr17	11241062	11246062	ENSG00000285541.1	ENSG00000285541	-	11242062	lncRNA	34.2098	-2.50078	0.639811	-3.90862	9.28234e-05	0.0019515
chrX	145243503	145248503	ENSG00000203923.5	SPANXN1	+	145247503	protein_coding	13.2126	-2.49943	0.880876	-2.83744	0.00454775	0.0407809
chr20	62699480	62704480	ENSG00000237687.2	LINC00686	-	62700480	lncRNA	43.4939	-2.49926	0.468681	-5.33253	9.68542e-08	5.12832e-06
chr2	131385314	131390314	ENSG00000234576.2	MTND1P26	-	131386314	unprocessed_pseudogene	47.3724	-2.49894	0.477935	-5.22862	1.70783e-07	8.39842e-06
chr11	1684629	1689629	ENSG00000205865.4	FAM99B	-	1685629	lncRNA	49.7979	-2.49841	0.4399	-5.67949	1.35096e-08	8.79793e-07
chr19	54969817	54974817	ENSG00000243494.1	ENSG00000243494	+	54973817	processed_pseudogene	37.4504	-2.49725	0.521003	-4.79315	1.64181e-06	6.10031e-05
chrX	137032995	137037995	ENSG00000165370.3	GPR101	-	137033995	protein_coding	103.326	-2.49682	0.362695	-6.88409	5.81601e-12	8.41486e-10
chr17	13542646	13547646	ENSG00000221698.1	MIR548H3	-	13543646	miRNA	25.618	-2.49601	0.643478	-3.87894	0.000104914	0.00216328
chrX	15913548	15918548	ENSG00000226536.1	SETP15	+	15917548	processed_pseudogene	31.5395	-2.49565	0.586857	-4.25256	2.11336e-05	0.000550281
chr4	174167913	174172913	ENSG00000251213.1	ENSG00000251213	-	174168913	lncRNA	38.4789	-2.49552	0.468699	-5.32436	1.0131e-07	5.322e-06
chr17	9017510	9022510	ENSG00000065320.9	NTN1	+	9021510	protein_coding	34.5825	-2.4943	0.571132	-4.36729	1.25797e-05	0.000355619
chr14	101043321	101048321	ENSG00000202560.4	MIR539	+	101047321	miRNA	76.7792	-2.49227	0.513293	-4.85545	1.20111e-06	4.68003e-05
chr3	187379101	187384101	ENSG00000280270.1	ENSG00000280270	+	187383101	TEC	39.4558	-2.49116	0.477097	-5.2215	1.77475e-07	8.67072e-06
chr20	54067485	54072485	ENSG00000265595.1	MIR4756	-	54068485	miRNA	59.7521	-2.49081	0.485865	-5.12655	2.95104e-07	1.36407e-05
chr8	139703109	139708109	ENSG00000169427.8	KCNK9	-	139704109	protein_coding	33.0645	-2.4894	0.540719	-4.60387	4.14706e-06	0.000135846
chr11	49858402	49863402	ENSG00000255550.1	ENSG00000255550	-	49859402	unprocessed_pseudogene	18.4506	-2.48867	0.833689	-2.98513	0.00283459	0.0292389
chr3	190162764	190167764	ENSG00000238077.1	NMNAT1P3	+	190166764	processed_pseudogene	26.2557	-2.48854	0.610149	-4.07858	4.53121e-05	0.00106737
chrX	101658850	101663850	ENSG00000184867.14	ARMCX2	-	101659850	protein_coding	57.3045	-2.48839	0.448496	-5.54831	2.88445e-08	1.7199e-06
chrX	103769718	103774718	ENSG00000123560.14	PLP1	+	103773718	protein_coding	54.2683	-2.48792	0.454538	-5.47351	4.41209e-08	2.52545e-06
chr8	85793399	85798399	ENSG00000274343.1	ENSG00000274343	-	85794399	processed_pseudogene	274.086	-2.48779	0.287612	-8.6498	5.1588e-18	2.76567e-15
chr3	45145422	45150422	ENSG00000163814.8	CDCP1	-	45146422	protein_coding	102.823	-2.48774	0.399929	-6.22045	4.95733e-10	4.52368e-08
chr13	77915689	77920689	ENSG00000234377.8	OBI1-AS1	+	77919689	lncRNA	44.5146	-2.48746	0.517454	-4.80712	1.5312e-06	5.77507e-05
chr5	130385680	130390680	ENSG00000252514.1	RNU7-53P	-	130386680	snRNA	18.1077	-2.48734	0.668462	-3.72099	0.000198446	0.00367106
chr8	23634507	23639507	ENSG00000253488.1	SINHCAFP3	-	23635507	processed_pseudogene	50.1489	-2.48713	0.492302	-5.05203	4.37128e-07	1.93134e-05
chr19	54846443	54851443	ENSG00000240403.5	KIR3DL2	+	54850443	protein_coding	47.8145	-2.48674	0.528626	-4.70415	2.5493e-06	8.941e-05
chr16	69333996	69338996	ENSG00000132603.15	NIP7	+	69337996	protein_coding	5.34986	-2.48606	1.46217	-1.70026	0.0890824	0.273033
chr10	75738740	75743740	ENSG00000228280.1	ENSG00000228280	+	75742740	lncRNA	53.429	-2.48593	0.513429	-4.84182	1.28656e-06	4.95512e-05
chr14	105901671	105906671	ENSG00000211921.1	IGHD5-12	-	105902671	IG_D_gene	36.0555	-2.48579	0.541507	-4.5905	4.42178e-06	0.000144055
chr15	40213428	40218428	ENSG00000137843.12	PAK6	+	40217428	protein_coding	6.58093	-2.48539	1.01933	-2.43826	0.0147582	0.0891136
chr6	32549090	32554090	ENSG00000251916.1	RNU1-61P	-	32550090	snRNA	32.4208	-2.48504	0.570231	-4.35795	1.31285e-05	0.000368738
chr1	94243819	94248819	ENSG00000226835.4	ARHGAP29-AS1	+	94247819	lncRNA	121.145	-2.48434	0.364695	-6.81212	9.61734e-12	1.3275e-09
chr16	19063614	19068614	ENSG00000167186.11	COQ7	+	19067614	protein_coding	6.06707	-2.4841	1.42988	-1.73728	0.0823382	0.260769
chr2	35218604	35223604	ENSG00000196085.5	SMIM7P1	-	35219604	processed_pseudogene	19.1209	-2.4832	0.721248	-3.44292	0.000575462	0.00867273
chr2	131384490	131389490	ENSG00000234939.1	MTND2P18	-	131385490	unprocessed_pseudogene	50.869	-2.48315	0.463162	-5.36131	8.26226e-08	4.46132e-06
chr4	155208027	155213027	ENSG00000250538.6	NPY2R-AS1	-	155209027	lncRNA	29.7656	-2.48302	0.538589	-4.61022	4.02234e-06	0.000132556
chr2	4139731	4144731	ENSG00000229550.1	ENSG00000229550	-	4140731	lncRNA	32.1936	-2.48224	0.556862	-4.45756	8.28971e-06	0.000247512
chr11	43577394	43582394	ENSG00000199077.3	MIR129-2	+	43581394	miRNA	86.0229	-2.48081	0.390917	-6.34613	2.20806e-10	2.23576e-08
chr5	42467300	42472300	ENSG00000250860.1	ENSG00000250860	-	42468300	processed_pseudogene	42.7651	-2.48044	0.575392	-4.31087	1.62611e-05	0.000441062
chr15	73367958	73372958	ENSG00000138622.4	HCN4	-	73368958	protein_coding	200.589	-2.48043	0.303216	-8.18041	2.82888e-16	1.01106e-13
chr16	69333871	69338871	ENSG00000272617.3	ENSG00000272617	-	69334871	protein_coding	4.9122	-2.47969	1.49676	-1.65671	0.0975786	0.288018
chr1	65788514	65793514	ENSG00000184588.18	PDE4B	+	65792514	protein_coding	136.068	-2.4782	0.418641	-5.91963	3.22659e-09	2.44309e-07
chr22	37367684	37372684	ENSG00000272694.1	ENSG00000272694	+	37371684	lncRNA	24.5828	-2.4776	0.568504	-4.3581	1.31198e-05	0.000368738
chr3	148275682	148280682	ENSG00000242440.2	LINC02046	+	148279682	lncRNA	41.1694	-2.47704	0.554875	-4.46414	8.03916e-06	0.000241352
chr17	49910403	49915403	ENSG00000254039.1	ENSG00000254039	+	49914403	lncRNA	112.348	-2.47673	0.372296	-6.65257	2.88021e-11	3.56576e-09
chr6	908006	913006	ENSG00000276687.1	ENSG00000276687	-	909006	lncRNA	60.5816	-2.47531	0.442499	-5.59392	2.21995e-08	1.35187e-06
chr20	32006438	32011438	ENSG00000101331.17	CCM2L	+	32010438	protein_coding	55.3759	-2.47509	0.438057	-5.65016	1.60298e-08	1.01422e-06
chr4	13650374	13655374	ENSG00000250634.6	LINC01182	+	13654374	lncRNA	66.9494	-2.47289	0.443933	-5.57043	2.54117e-08	1.52888e-06
chr4	6562600	6567600	ENSG00000074211.14	PPP2R2C	-	6563600	protein_coding	59.0293	-2.46956	0.454619	-5.43214	5.56807e-08	3.12457e-06
chr10	27239130	27244130	ENSG00000262412.1	ENSG00000262412	+	27243130	lncRNA	5.90914	-2.46934	1.3523	-1.82604	0.0678447	0.231986
chr2	218998215	219003215	ENSG00000224090.1	ENSG00000224090	+	219002215	lncRNA	24.5855	-2.46836	0.642878	-3.83954	0.000123264	0.00246053
chr13	102390612	102395612	ENSG00000272143.2	FGF14-AS2	+	102394612	lncRNA	46.6369	-2.46797	0.477867	-5.16455	2.41016e-07	1.1377e-05
chr14	105857175	105862175	ENSG00000264024.2	MIR4507	-	105858175	miRNA	35.6525	-2.46721	0.590578	-4.17761	2.94583e-05	0.000734854
chr18	44676173	44681173	ENSG00000152217.20	SETBP1	+	44680173	protein_coding	36.6938	-2.46709	0.474966	-5.19425	2.05544e-07	9.88918e-06
chrX	154601858	154606858	ENSG00000232155.1	ENSG00000232155	+	154605858	processed_pseudogene	43.8243	-2.46594	0.483355	-5.10171	3.36599e-07	1.53344e-05
chr5	38345551	38350551	ENSG00000249071.2	EGFLAM-AS3	-	38346551	lncRNA	57.8492	-2.46494	0.478002	-5.15676	2.51263e-07	1.18143e-05
chr10	70668506	70673506	ENSG00000138316.11	ADAMTS14	+	70672506	protein_coding	61.3841	-2.46493	0.41299	-5.9685	2.39449e-09	1.86721e-07
chr12	130043956	130048956	ENSG00000261650.1	ENSG00000261650	-	130044956	lncRNA	51.9151	-2.46461	0.480797	-5.1261	2.95812e-07	1.36629e-05
chr11	2170815	2175815	ENSG00000180176.15	TH	-	2171815	protein_coding	22.5858	-2.46457	0.680545	-3.62146	0.000292945	0.00501986
chr10	130961668	130966668	ENSG00000264803.1	MIR378C	-	130962668	miRNA	49.3129	-2.46416	0.493083	-4.99745	5.80925e-07	2.48264e-05
chr8	85805435	85810435	ENSG00000270416.2	REXO1L4P	-	85806435	processed_pseudogene	302.992	-2.46155	0.29152	-8.44383	3.071e-17	1.39693e-14
chr7	3297252	3302252	ENSG00000146555.20	SDK1	+	3301252	protein_coding	16.4537	-2.46128	0.746185	-3.29848	0.0009721	0.0130579
chr11	131249360	131254360	ENSG00000231698.3	ENSG00000231698	+	131253360	lncRNA	61.7196	-2.4609	0.414454	-5.93768	2.89087e-09	2.2112e-07
chr19	53718166	53723166	ENSG00000207799.1	MIR520G	+	53722166	miRNA	55.5023	-2.46011	0.524143	-4.69359	2.6845e-06	9.33176e-05
chr19	53718165	53723165	ENSG00000251843.1	RNU6-803P	-	53719165	snRNA	55.5023	-2.46011	0.524143	-4.69359	2.6845e-06	9.33176e-05
chr8	7749682	7754682	ENSG00000285657.1	FAM90A19	+	7753682	protein_coding	52.1142	-2.46	0.497136	-4.94834	7.4848e-07	3.07609e-05
chr3	129001690	129006690	ENSG00000114656.13	CFAP92	-	129002690	protein_coding	47.4587	-2.4599	0.459182	-5.35714	8.45492e-08	4.54899e-06
chr19	46179647	46184647	ENSG00000269729.1	ENSG00000269729	-	46180647	lncRNA	70.9654	-2.45937	0.417808	-5.88635	3.94813e-09	2.92686e-07
chr5	40910128	40915128	ENSG00000253098.1	RNU7-161P	-	40911128	snRNA	37.0967	-2.45896	0.568276	-4.32705	1.51119e-05	0.000416994
chr2	123072481	123077481	ENSG00000232740.1	LINC01826	-	123073481	lncRNA	20.4888	-2.45887	0.828153	-2.9691	0.00298677	0.0303735
chrX	101779538	101784538	ENSG00000178146.9	GK4P	-	101780538	processed_pseudogene	22.4816	-2.45856	0.682625	-3.60162	0.000316242	0.00533832
chr10	114235254	114240254	ENSG00000165816.13	VWA2	+	114239254	protein_coding	63.652	-2.45767	0.427216	-5.75276	8.77967e-09	5.95668e-07
chrX	152749921	152754921	ENSG00000268916.6	CSAG3	+	152753921	protein_coding	17.262	-2.45765	0.720829	-3.40948	0.000650861	0.00957768
chr14	105911276	105916276	ENSG00000211928.1	IGHD5-5	-	105912276	IG_D_gene	47.813	-2.45764	0.483464	-5.0834	3.70731e-07	1.66993e-05
chr11	72614130	72619130	ENSG00000272036.1	MIR139	-	72615130	miRNA	108.574	-2.45722	0.368449	-6.66908	2.57412e-11	3.24026e-09
chr19	53678159	53683159	ENSG00000283540.1	MIR520F	+	53682159	miRNA	44.847	-2.457	0.52886	-4.64584	3.38692e-06	0.000114507
chr11	1684297	1689297	ENSG00000227306.1	LINC02708	+	1688297	lncRNA	48.6638	-2.4555	0.432034	-5.68357	1.31911e-08	8.6186e-07
chr8	29352170	29357170	ENSG00000260253.1	ENSG00000260253	-	29353170	lncRNA	66.0739	-2.45429	0.418038	-5.87098	4.33225e-09	3.18002e-07
chr11	2169063	2174063	ENSG00000265258.1	MIR4686	+	2173063	miRNA	29.7474	-2.45411	0.605623	-4.05221	5.07353e-05	0.00117529
chr13	113882651	113887651	ENSG00000226921.7	LINC00454	-	113883651	lncRNA	63.3779	-2.45389	0.410018	-5.98485	2.16589e-09	1.70667e-07
chr2	215754930	215759930	ENSG00000288791.1	ENSG00000288791	+	215758930	lncRNA	25.2314	-2.45368	0.638873	-3.84064	0.000122716	0.00245449
chr14	105770405	105775405	ENSG00000211897.9	IGHG3	-	105771405	IG_C_gene	66.5153	-2.45262	0.428825	-5.71939	1.0691e-08	7.10884e-07
chr2	136115456	136120456	ENSG00000289974.1	ENSG00000289974	+	136119456	lncRNA	49.2682	-2.45255	0.475215	-5.16092	2.45736e-07	1.15816e-05
chr19	40217384	40222384	ENSG00000174521.8	TTC9B	-	40218384	protein_coding	50.0059	-2.45242	0.458567	-5.34801	8.89249e-08	4.75036e-06
chrX	48195795	48200795	ENSG00000165583.16	SSX5	-	48196795	protein_coding	8.1029	-2.45201	1.135	-2.16037	0.0307441	0.14223
chr8	127737987	127742987	ENSG00000249375.8	CASC11	-	127738987	lncRNA	117.322	-2.4514	0.360947	-6.79156	1.10924e-11	1.5137e-09
chr9	136654856	136659856	ENSG00000172889.16	EGFL7	+	136658856	protein_coding	58.2505	-2.45059	0.486444	-5.03777	4.70987e-07	2.06122e-05
chr15	98278075	98283075	ENSG00000259041.1	ENSG00000259041	+	98282075	lncRNA	47.3772	-2.45029	0.494927	-4.95082	7.39031e-07	3.04351e-05
chr20	13995443	14000443	ENSG00000101251.13	SEL1L2	-	13996443	protein_coding	55.586	-2.44978	0.586458	-4.17726	2.95046e-05	0.000735703
chr12	48998375	49003375	ENSG00000181418.8	DDN	-	48999375	protein_coding	4.4347	-2.44976	1.55427	-1.57615	0.114992	0.315789
chr18	72864388	72869388	ENSG00000263958.4	NETO1-DT	+	72868388	lncRNA	23.1048	-2.44931	0.722667	-3.38927	0.0007008	0.0101238
chr14	105875976	105880976	ENSG00000226777.9	FAM30A	+	105879976	lncRNA	93.1756	-2.44906	0.416508	-5.87998	4.10324e-09	3.03792e-07
chr7	286170	291170	ENSG00000248767.2	FOXL3	+	290170	protein_coding	33.6906	-2.44883	0.510549	-4.79647	1.61487e-06	6.01882e-05
chr5	142562700	142567700	ENSG00000225147.1	RPS12P10	+	142566700	processed_pseudogene	41.3183	-2.44826	0.468208	-5.22899	1.70438e-07	8.38833e-06
chrX	153876672	153881672	ENSG00000273769.5	L1CAM-AS1	+	153880672	lncRNA	55.265	-2.4481	0.407818	-6.00292	1.93797e-09	1.54739e-07
chr2	38066041	38071041	ENSG00000235848.4	RMDN2-AS1	-	38067041	lncRNA	21.0732	-2.44807	0.618204	-3.95997	7.49591e-05	0.00162968
chr6	159044152	159049152	ENSG00000164691.18	TAGAP	-	159045152	protein_coding	99.6466	-2.44712	0.397722	-6.15283	7.61115e-10	6.66187e-08
chr11	130662735	130667735	ENSG00000274999.1	MIR8052	+	130666735	miRNA	50.5981	-2.44697	0.468186	-5.2265	1.72746e-07	8.47415e-06
chr16	85984386	85989386	ENSG00000285040.1	ENSG00000285040	-	85985386	lncRNA	42.7322	-2.44675	0.539931	-4.5316	5.85393e-06	0.000182689
chr22	49849844	49854844	ENSG00000100426.7	ZBED4	+	49853844	protein_coding	12.5738	-2.44601	0.867676	-2.81904	0.00481677	0.0424571
chr21	44513216	44518216	ENSG00000182912.6	TSPEAR-AS2	+	44517216	lncRNA	35.6271	-2.44526	0.530599	-4.6085	4.05586e-06	0.000133502
chr8	85817783	85822783	ENSG00000277436.1	REXO1L5P	-	85818783	processed_pseudogene	308.667	-2.44359	0.306988	-7.9599	1.72177e-15	5.38449e-13
chr11	99016949	99021949	ENSG00000149972.12	CNTN5	+	99020949	protein_coding	97.5536	-2.44355	0.404933	-6.03444	1.59512e-09	1.30133e-07
chr16	17130504	17135504	ENSG00000261448.1	ENSG00000261448	+	17134504	lncRNA	39.1715	-2.44352	0.526182	-4.64387	3.41949e-06	0.000115478
chr17	73637026	73642026	ENSG00000264750.1	ENSG00000264750	+	73641026	lncRNA	45.3634	-2.44259	0.530381	-4.60535	4.11768e-06	0.000135253
chr17	45221222	45226222	ENSG00000267121.6	FMNL1-DT	-	45222222	lncRNA	43.2118	-2.44203	0.495147	-4.93193	8.14203e-07	3.31252e-05
chr19	49422441	49427441	ENSG00000142538.2	PTH2	-	49423441	protein_coding	69.8347	-2.44191	0.410665	-5.94623	2.74394e-09	2.11498e-07
chrX	139221777	139226777	ENSG00000129682.16	FGF13	-	139222777	protein_coding	23.4447	-2.44073	0.570782	-4.27611	1.90187e-05	0.000503144
chr2	130266440	130271440	ENSG00000237722.2	MTND1P29	+	130270440	unprocessed_pseudogene	71.0969	-2.44045	0.440508	-5.54007	3.02347e-08	1.79566e-06
chr19	54256301	54261301	ENSG00000105609.17	LILRB5	-	54257301	protein_coding	120.552	-2.4382	0.377302	-6.46219	1.03198e-10	1.12254e-08
chr17	73782675	73787675	ENSG00000234721.3	LINC02092	+	73786675	lncRNA	78.463	-2.43742	0.426996	-5.70831	1.14103e-08	7.54541e-07
chr16	86506527	86511527	ENSG00000103241.7	FOXF1	+	86510527	protein_coding	12.4983	-2.43598	0.873863	-2.7876	0.00531	0.0453045
chr12	130044057	130049057	ENSG00000214039.9	LINC02418	-	130045057	lncRNA	51.5574	-2.43592	0.477297	-5.10358	3.33295e-07	1.52301e-05
chr2	30982939	30987939	ENSG00000234579.1	ENSG00000234579	+	30986939	lncRNA	20.7313	-2.43558	0.746787	-3.26141	0.00110859	0.0144391
chr5	17601134	17606134	ENSG00000249282.1	ENSG00000249282	-	17602134	processed_pseudogene	18.1673	-2.43534	0.796712	-3.05674	0.00223761	0.0246568
chr19	53727006	53732006	ENSG00000207803.1	MIR518A1	+	53731006	miRNA	44.9509	-2.43507	0.499377	-4.87622	1.08136e-06	4.27447e-05
chr16	87591131	87596131	ENSG00000260750.7	ENSG00000260750	+	87595131	lncRNA	63.2442	-2.43437	0.391289	-6.2214	4.92744e-10	4.51011e-08
chr21	42107534	42112534	ENSG00000184385.2	UMODL1-AS1	-	42108534	lncRNA	17.2702	-2.43423	0.688274	-3.53672	0.000405137	0.00653574
chr11	113383779	113388779	ENSG00000170209.5	ANKK1	+	113387779	protein_coding	66.9988	-2.43406	0.458881	-5.30433	1.13088e-07	5.83355e-06
chr6	48110197	48115197	ENSG00000244694.8	PTCHD4	-	48111197	protein_coding	18.0228	-2.43385	0.71301	-3.41349	0.000641372	0.00946437
chr5	20301565	20306565	ENSG00000249854.3	CDH18-AS1	+	20305565	lncRNA	23.7598	-2.43293	0.650448	-3.7404	0.000183731	0.00344748
chr7	93573730	93578730	ENSG00000004948.16	CALCR	-	93574730	protein_coding	104.466	-2.43237	0.385163	-6.31517	2.69869e-10	2.66513e-08
chr20	2206397	2211397	ENSG00000287561.1	ENSG00000287561	-	2207397	lncRNA	49.4467	-2.43215	0.410213	-5.92899	3.04803e-09	2.32549e-07
chr2	94583101	94588101	ENSG00000259916.2	AQP7B	+	94587101	protein_coding	18.4779	-2.43181	0.72455	-3.35631	0.000789913	0.0111128
chr3	5249255	5254255	ENSG00000265180.1	MIR4790	-	5250255	miRNA	184.719	-2.43088	0.347487	-6.99562	2.64092e-12	4.11874e-10
chr7	67696029	67701029	ENSG00000233423.1	ENSG00000233423	-	67697029	lncRNA	32.158	-2.42838	0.651662	-3.72644	0.000194205	0.00360458
chr19	53696015	53701015	ENSG00000207706.1	MIR518F	+	53700015	miRNA	47.4371	-2.42825	0.490748	-4.94806	7.49562e-07	3.07668e-05
chr16	29290072	29295072	ENSG00000289029.1	ENSG00000289029	-	29291072	lncRNA	23.4351	-2.42778	0.617394	-3.9323	8.41355e-05	0.00179653
chr18	35466088	35471088	ENSG00000267583.5	ZNF24TR	-	35467088	lncRNA	7.32278	-2.42772	2.13268	-1.13834	0.254977	0.493755
chr11	94400419	94405419	ENSG00000123901.9	GPR83	-	94401419	protein_coding	47.9304	-2.42765	0.488071	-4.97398	6.55918e-07	2.74835e-05
chr8	11932203	11937203	ENSG00000206014.7	OR7E161P	-	11933203	transcribed_unprocessed_pseudogene	85.3993	-2.42709	0.423134	-5.73598	9.6951e-09	6.51884e-07
chr8	13603610	13608610	ENSG00000164741.15	DLC1	-	13604610	protein_coding	30.5355	-2.42708	0.563038	-4.31069	1.62748e-05	0.000441062
chr1	204195491	204200491	ENSG00000170498.10	KISS1	-	204196491	protein_coding	98.5463	-2.42566	0.443948	-5.46383	4.6597e-08	2.6495e-06
chr17	50630940	50635940	ENSG00000251239.1	ENSG00000251239	-	50631940	lncRNA	73.4167	-2.42523	0.445834	-5.43976	5.33534e-08	3.00803e-06
chr8	85747373	85752373	ENSG00000276540.1	REXO1L10P	-	85748373	processed_pseudogene	280.761	-2.42486	0.339364	-7.14529	8.98035e-13	1.55843e-10
chr10	133526513	133531513	ENSG00000278518.1	ENSG00000278518	-	133527513	lncRNA	71.3107	-2.42443	0.441193	-5.49517	3.90324e-08	2.26004e-06
chr2	5690118	5695118	ENSG00000230090.5	ENSG00000230090	-	5691118	lncRNA	25.5157	-2.42405	0.629515	-3.85066	0.000117798	0.0023775
chr3	21938566	21943566	ENSG00000223351.5	ZNF385D-AS2	+	21942566	lncRNA	33.8738	-2.42396	0.526426	-4.60456	4.13337e-06	0.000135579
chr9	133275024	133280024	ENSG00000175164.16	ABO	-	133276024	protein_coding	70.1181	-2.42324	0.413353	-5.8624	4.56231e-09	3.32756e-07
chr18	59216158	59221158	ENSG00000134443.10	GRP	+	59220158	protein_coding	105.162	-2.42302	0.345741	-7.00818	2.4144e-12	3.805e-10
chr1	3065168	3070168	ENSG00000142611.17	PRDM16	+	3069168	protein_coding	4.10064	-2.42209	1.59145	-1.52194	0.128023	0.335854
chr14	106810131	106815131	ENSG00000224650.2	IGHV3-74	-	106811131	IG_V_gene	45.5241	-2.42162	0.488224	-4.96005	7.04753e-07	2.92239e-05
chr10	97770999	97775999	ENSG00000120057.5	SFRP5	-	97771999	protein_coding	98.6744	-2.42138	0.41884	-5.78115	7.41915e-09	5.14804e-07
chr16	86636145	86641145	ENSG00000260387.1	ENSG00000260387	-	86637145	lncRNA	30.371	-2.42127	0.614246	-3.94185	8.0856e-05	0.00173762
chr8	7491911	7496911	ENSG00000198129.3	DEFB107B	+	7495911	protein_coding	121.056	-2.42107	0.359236	-6.73951	1.58917e-11	2.10641e-09
chr12	5579797	5584797	ENSG00000255973.1	ENSG00000255973	+	5583797	processed_pseudogene	61.9314	-2.42107	0.422987	-5.72374	1.04203e-08	6.95199e-07
chr8	31635222	31640222	ENSG00000157168.20	NRG1	+	31639222	protein_coding	94.8176	-2.42041	0.35938	-6.73497	1.63968e-11	2.1638e-09
chr2	219510170	219515170	ENSG00000072182.14	ASIC4	+	219514170	protein_coding	122.994	-2.41889	0.40347	-5.99522	2.03214e-09	1.61058e-07
chr12	58780747	58785747	ENSG00000257259.3	LINC02388	-	58781747	lncRNA	32.0684	-2.41886	0.503373	-4.80531	1.54512e-06	5.81662e-05
chr2	238554054	238559054	ENSG00000225493.1	LINC01107	-	238555054	lncRNA	48.9	-2.41741	0.450698	-5.3637	8.15335e-08	4.41045e-06
chrX	64697547	64702547	ENSG00000225814.1	GRPEL2P2	-	64698547	processed_pseudogene	12.1953	-2.41723	0.839292	-2.88008	0.00397571	0.0371661
chr10	123426640	123431640	ENSG00000225152.1	ENSG00000225152	-	123427640	lncRNA	134.851	-2.41669	0.386817	-6.24763	4.16728e-10	3.90359e-08
chr2	131379913	131384913	ENSG00000227661.1	MTCO3P18	-	131380913	unprocessed_pseudogene	32.6887	-2.41649	0.495526	-4.87661	1.07923e-06	4.27168e-05
chr1	222640858	222645858	ENSG00000229399.1	ENSG00000229399	-	222641858	processed_pseudogene	8.14543	-2.41624	1.03603	-2.3322	0.0196902	0.107363
chr11	69151478	69156478	ENSG00000284713.2	SMIM38	+	69155478	protein_coding	51.4387	-2.41608	0.513257	-4.70736	2.50949e-06	8.82379e-05
chr7	55015017	55020017	ENSG00000146648.21	EGFR	+	55019017	protein_coding	71.6045	-2.41598	0.388645	-6.2164	5.0868e-10	4.63478e-08
chr22	49260201	49265201	ENSG00000280199.1	ENSG00000280199	+	49264201	lncRNA	38.2009	-2.41589	0.574156	-4.20773	2.57947e-05	0.000655723
chr12	126860465	126865465	ENSG00000255923.1	ENSG00000255923	+	126864465	processed_pseudogene	30.6074	-2.41501	0.569556	-4.24016	2.23365e-05	0.000577595
chr9	87144644	87149644	ENSG00000204446.4	LINC02872	+	87148644	lncRNA	65.1046	-2.41338	0.48742	-4.95133	7.37076e-07	3.03873e-05
chr6	46014745	46019745	ENSG00000212468.1	RNU6-754P	+	46018745	snRNA	89.7108	-2.41323	0.389701	-6.19252	5.9209e-10	5.32207e-08
chrX	145993860	145998860	ENSG00000216005.1	MIR888	-	145994860	miRNA	15.8397	-2.41179	0.775291	-3.11081	0.00186572	0.0215116
chr2	218992422	218997422	ENSG00000163499.12	CRYBA2	-	218993422	protein_coding	32.7859	-2.41111	0.598627	-4.02773	5.63169e-05	0.0012833
chr13	110306157	110311157	ENSG00000187498.16	COL4A1	-	110307157	protein_coding	33.1664	-2.41055	0.543382	-4.43619	9.15652e-06	0.000269904
chr11	105070541	105075541	ENSG00000254750.1	CASP1P2	-	105071541	unprocessed_pseudogene	43.3647	-2.41034	0.523442	-4.6048	4.12865e-06	0.000135539
chr4	23903089	23908089	ENSG00000109819.9	PPARGC1A	-	23904089	protein_coding	42.011	-2.41029	0.577891	-4.17085	3.03469e-05	0.000754513
chr2	4655498	4660498	ENSG00000231532.6	LINC01249	-	4656498	lncRNA	31.105	-2.41013	0.606549	-3.97352	7.08185e-05	0.00155707
chr11	19346724	19351724	ENSG00000166833.23	NAV2	+	19350724	protein_coding	131.406	-2.41008	0.389972	-6.18014	6.40448e-10	5.72248e-08
chr3	2984575	2989575	ENSG00000225310.1	DNAJC19P4	-	2985575	processed_pseudogene	54.3011	-2.40983	0.461795	-5.2184	1.80473e-07	8.80287e-06
chr5	130110409	130115409	ENSG00000199455.1	RNA5SP191	+	130114409	rRNA_pseudogene	47.4328	-2.40823	0.562233	-4.28333	1.84118e-05	0.000490033
chr6	102998514	103003514	ENSG00000217120.1	ENSG00000217120	+	103002514	processed_pseudogene	52.5252	-2.4082	0.48713	-4.94365	7.66728e-07	3.14034e-05
chr16	1224268	1229268	ENSG00000116176.7	TPSG1	-	1225268	protein_coding	48.0123	-2.4076	0.488596	-4.92759	8.32498e-07	3.37881e-05
chr11	3222061	3227061	ENSG00000224513.2	ENSG00000224513	+	3226061	lncRNA	94.1123	-2.40729	0.381096	-6.31676	2.67097e-10	2.64407e-08
chr5	7268792	7273792	ENSG00000285689.1	ENSG00000285689	+	7272792	lncRNA	59.3732	-2.4065	0.495966	-4.85214	1.22135e-06	4.74757e-05
chr14	105913389	105918389	ENSG00000211930.1	IGHD3-3	-	105914389	IG_D_gene	50.8965	-2.4051	0.493049	-4.87803	1.07153e-06	4.248e-05
chr17	42111714	42116714	ENSG00000108771.13	DHX58	-	42112714	protein_coding	3.86631	-2.405	1.68385	-1.42827	0.153213	NA
chr2	102428289	102433289	ENSG00000264764.1	MIR4772	+	102432289	miRNA	40.8676	-2.40335	0.483698	-4.9687	6.74015e-07	2.80821e-05
chr2	94946341	94951341	ENSG00000259848.9	ENSG00000259848	-	94947341	transcribed_unprocessed_pseudogene	57.9921	-2.40305	0.42851	-5.60791	2.04781e-08	1.26371e-06
chr12	4444815	4449815	ENSG00000111241.3	FGF6	-	4445815	protein_coding	68.5784	-2.40274	0.47662	-5.0412	4.6263e-07	2.0276e-05
chr12	3363833	3368833	ENSG00000257048.1	LINC02417	+	3367833	lncRNA	75.5505	-2.40213	0.432257	-5.55717	2.74177e-08	1.64134e-06
chr4	73706302	73711302	ENSG00000228277.1	UMLILO	+	73710302	lncRNA	41.9685	-2.40165	0.556955	-4.31211	1.61707e-05	0.000439745
chrX	154375273	154380273	ENSG00000102119.12	EMD	+	154379273	protein_coding	2.29118	-2.4002	1.89237	-1.26835	0.204672	NA
chr7	43108629	43113629	ENSG00000002746.15	HECW1	+	43112629	protein_coding	97.477	-2.40004	0.376023	-6.38269	1.74008e-10	1.7983e-08
chr17	50561108	50566108	ENSG00000250107.1	CACNA1G-AS1	-	50562108	lncRNA	96.0049	-2.39994	0.402015	-5.96978	2.37579e-09	1.85503e-07
chr12	131482034	131487034	ENSG00000279388.1	ENSG00000279388	-	131483034	TEC	80.8539	-2.39943	0.423334	-5.66794	1.44521e-08	9.28085e-07
chr5	43482893	43487893	ENSG00000151881.15	TMEM267	-	43483893	protein_coding	6.71745	-2.39935	1.13769	-2.10896	0.034948	0.153764
chr10	125158379	125163379	ENSG00000282787.1	ENSG00000282787	+	125162379	lncRNA	3.18177	-2.39929	2.41283	-0.994391	0.320033	NA
chr7	71303674	71308674	ENSG00000283278.1	MIR3914-2	+	71307674	miRNA	25.4015	-2.39916	0.563788	-4.25544	2.08642e-05	0.000544446
chr5	19037799	19042799	ENSG00000251487.1	ENSG00000251487	-	19038799	lncRNA	10.6315	-2.39867	0.84097	-2.85227	0.0043408	0.0395937
chr15	96388056	96393056	ENSG00000259614.2	TUBAP12	-	96389056	processed_pseudogene	30.2569	-2.39749	0.604292	-3.96744	7.26488e-05	0.00158854
chr7	3642784	3647784	ENSG00000236510.1	ENSG00000236510	-	3643784	lncRNA	18.0536	-2.397	0.784252	-3.05641	0.00224003	0.0246745
chr17	72057073	72062073	ENSG00000228639.8	ROCR	-	72058073	lncRNA	39.0123	-2.39631	0.560695	-4.27382	1.92153e-05	0.000507595
chr12	2265776	2270776	ENSG00000256721.1	CACNA1C-IT3	+	2269776	lncRNA	62.7044	-2.39609	0.443836	-5.39859	6.71665e-08	3.73075e-06
chr2	237481428	237486428	ENSG00000115648.14	MLPH	+	237485428	protein_coding	101.935	-2.3955	0.39078	-6.13005	8.78498e-10	7.58971e-08
chr11	124404102	124409102	ENSG00000255048.1	OR8X1P	-	124405102	unprocessed_pseudogene	66.9545	-2.39541	0.448964	-5.33541	9.53283e-08	5.06091e-06
chr7	142784225	142789225	ENSG00000281958.1	TRBJ1-4	+	142788225	TR_J_gene	38.9321	-2.39521	0.600687	-3.98745	6.67863e-05	0.00148297
chr16	88865660	88870660	ENSG00000205022.9	PABPN1L	-	88866660	protein_coding	29.9848	-2.39455	0.552401	-4.33481	1.45888e-05	0.000403673
chr15	20008741	20013741	ENSG00000277988.1	FAM30B	+	20012741	unprocessed_pseudogene	6.49337	-2.39392	1.2552	-1.9072	0.0564941	0.207001
chr2	130281606	130286606	ENSG00000248136.1	MTND6P8	-	130282606	unprocessed_pseudogene	53.2712	-2.39316	0.448209	-5.33939	9.32603e-08	4.96542e-06
chr19	53682469	53687469	ENSG00000207788.1	MIR519C	+	53686469	miRNA	42.2871	-2.39224	0.599916	-3.98764	6.6735e-05	0.00148297
chr17	41614899	41619899	ENSG00000186832.9	KRT16	-	41615899	protein_coding	38.7203	-2.39217	0.511159	-4.67989	2.8703e-06	9.86515e-05
chr2	130278679	130283679	ENSG00000233550.1	MTCYBP8	+	130282679	unprocessed_pseudogene	77.884	-2.39183	0.441205	-5.42113	5.92245e-08	3.31106e-06
chr3	147405809	147410809	ENSG00000174963.18	ZIC4	-	147406809	protein_coding	23.9006	-2.39037	0.657756	-3.63413	0.000278924	0.00481949
chr2	215529133	215534133	ENSG00000237525.7	ENSG00000237525	+	215533133	lncRNA	35.7135	-2.39017	0.492753	-4.85064	1.23064e-06	4.7734e-05
chr19	51019175	51024175	ENSG00000129451.12	KLK10	-	51020175	protein_coding	42.2363	-2.38942	0.514751	-4.6419	3.45217e-06	0.000116255
chr16	2853898	2858898	ENSG00000263325.1	ENSG00000263325	+	2857898	lncRNA	33.7538	-2.38812	0.494796	-4.82647	1.38976e-06	5.30494e-05
chr5	1932985	1937985	ENSG00000288108.1	ENSG00000288108	-	1933985	lncRNA	49.7999	-2.38777	0.509936	-4.68249	2.83411e-06	9.75193e-05
chrX	52541151	52546151	ENSG00000227058.1	ENSG00000227058	+	52545151	unprocessed_pseudogene	24.7789	-2.38716	0.601812	-3.96662	7.29003e-05	0.00159288
chr16	7125639	7130639	ENSG00000240419.1	ENSG00000240419	-	7126639	processed_pseudogene	21.59	-2.3867	0.653375	-3.65288	0.000259312	0.00455134
chrX	93776384	93781384	ENSG00000270826.1	USP37P1	-	93777384	processed_pseudogene	11.5304	-2.38635	0.97018	-2.4597	0.0139053	0.0858365
chr20	23031312	23036312	ENSG00000132671.6	SSTR4	+	23035312	protein_coding	29.9758	-2.38581	0.590693	-4.039	5.36806e-05	0.001234
chr2	4826084	4831084	ENSG00000252238.1	ENSG00000252238	-	4827084	snoRNA	36.9849	-2.38535	0.619885	-3.84805	0.000119062	0.00239658
chr2	131380590	131385590	ENSG00000236590.1	MTATP6P4	-	131381590	unprocessed_pseudogene	38.5459	-2.38495	0.485961	-4.90771	9.21453e-07	3.70085e-05
chr10	69572422	69577422	ENSG00000122859.5	NEUROG3	-	69573422	protein_coding	74.2498	-2.3849	0.375302	-6.35462	2.08945e-10	2.14827e-08
chr14	106736547	106741547	ENSG00000281990.1	IGHV1-69-2	-	106737547	IG_V_gene	1.91569	-2.38373	2.49841	-0.954102	0.340032	NA
chr14	70183123	70188123	ENSG00000258422.6	ENSG00000258422	+	70187123	lncRNA	64.9517	-2.38323	0.39223	-6.0761	1.23141e-09	1.02979e-07
chr19	54198971	54203971	ENSG00000223660.1	ENSG00000223660	-	54199971	lncRNA	4.97242	-2.38262	1.61039	-1.47952	0.139	0.352158
chr3	2358258	2363258	ENSG00000230398.1	HINT2P1	+	2362258	processed_pseudogene	36.4934	-2.38259	0.536628	-4.43992	8.99904e-06	0.000265784
chr10	4651427	4656427	ENSG00000225269.3	LINC00705	+	4655427	lncRNA	30.1184	-2.38256	0.599454	-3.97455	7.05126e-05	0.00155257
chr1	30411825	30416825	ENSG00000231949.1	ENSG00000231949	+	30415825	lncRNA	29.1377	-2.38255	0.553486	-4.30462	1.67274e-05	0.000452219
chrX	65404084	65409084	ENSG00000228158.2	TLE1P1	+	65408084	processed_pseudogene	24.3226	-2.38142	0.611486	-3.89449	9.84071e-05	0.00205094
chr7	155253106	155258106	ENSG00000289248.1	ENSG00000289248	-	155254106	lncRNA	54.9858	-2.3808	0.439206	-5.4207	5.93673e-08	3.31394e-06
chr13	90925597	90930597	ENSG00000231674.1	LINC00410	-	90926597	lncRNA	33.2437	-2.38049	0.61466	-3.87286	0.000107568	0.00220848
chrX	102138563	102143563	ENSG00000286794.2	ENSG00000286794	+	102142563	lncRNA	33.8947	-2.38008	0.561936	-4.23551	2.28038e-05	0.000587905
chr9	90641862	90646862	ENSG00000165023.7	DIRAS2	-	90642862	protein_coding	56.9886	-2.37984	0.491803	-4.83901	1.3049e-06	5.02251e-05
chr20	43188970	43193970	ENSG00000196090.13	PTPRT	-	43189970	protein_coding	58.3306	-2.37948	0.41547	-5.72721	1.02098e-08	6.82667e-07
chr12	126190406	126195406	ENSG00000286386.1	ENSG00000286386	-	126191406	lncRNA	39.8778	-2.37873	0.589782	-4.03324	5.50135e-05	0.00125933
chr5	130136031	130141031	ENSG00000248610.1	HSPA8P4	+	130140031	processed_pseudogene	32.9237	-2.37819	0.611553	-3.88878	0.00010075	0.00209106
chr17	50630777	50635777	ENSG00000108846.16	ABCC3	+	50634777	protein_coding	72.2944	-2.37801	0.45151	-5.26679	1.38831e-07	6.97573e-06
chrX	122010612	122015612	ENSG00000237891.1	UBE2V1P16	-	122011612	processed_pseudogene	23.8651	-2.37793	0.617937	-3.84817	0.000119001	0.00239658
chr17	74931898	74936898	ENSG00000182938.7	OTOP3	+	74935898	protein_coding	82.417	-2.3776	0.431842	-5.50573	3.67645e-08	2.15155e-06
chr5	1927064	1932064	ENSG00000248994.2	ENSG00000248994	+	1931064	lncRNA	32.3367	-2.37749	0.528047	-4.50242	6.7183e-06	0.000206589
chrX	3949056	3954056	ENSG00000225722.1	RPL24P9	+	3953056	processed_pseudogene	32.7975	-2.37688	0.626565	-3.79351	0.000148532	0.00288159
chrX	73127080	73132080	ENSG00000204118.2	NAP1L6P	-	73128080	transcribed_processed_pseudogene	43.2048	-2.37673	0.535074	-4.44187	8.91805e-06	0.000263911
chr16	79599737	79604737	ENSG00000178573.7	MAF	-	79600737	protein_coding	22.2983	-2.3764	0.58215	-4.08211	4.46283e-05	0.0010554
chr21	31037476	31042476	ENSG00000206102.2	KRTAP19-8	-	31038476	protein_coding	34.3386	-2.37603	0.660542	-3.5971	0.00032179	0.00541523
chr16	81034759	81039759	ENSG00000260213.6	CENPN-AS1	-	81035759	lncRNA	4.67552	-2.37549	1.32137	-1.79775	0.0722168	0.24106
chr8	12024598	12029598	ENSG00000255016.1	ENSG00000255016	-	12025598	processed_pseudogene	75.0957	-2.37531	0.412368	-5.76018	8.40261e-09	5.74632e-07
chr11	49813778	49818778	ENSG00000254487.2	ENSG00000254487	+	49817778	unprocessed_pseudogene	47.4802	-2.37531	0.534196	-4.44652	8.72741e-06	0.000258907
chr2	110606916	110611916	ENSG00000231536.1	ENSG00000231536	+	110610916	lncRNA	83.3383	-2.37519	0.412601	-5.75662	8.58126e-09	5.85515e-07
chr16	79101957	79106957	ENSG00000260511.1	ENSG00000260511	+	79105957	lncRNA	15.9531	-2.37504	0.786924	-3.01812	0.00254345	0.0270276
chr22	48048646	48053646	ENSG00000278890.1	ENSG00000278890	+	48052646	lncRNA	33.5	-2.37424	0.539897	-4.39758	1.09463e-05	0.00031463
chr13	102393519	102398519	ENSG00000243319.7	FGF14-IT1	-	102394519	lncRNA	31.2849	-2.37362	0.528821	-4.48852	7.17209e-06	0.000218822
chr5	176725243	176730243	ENSG00000248484.1	ENSG00000248484	-	176726243	lncRNA	87.0084	-2.37356	0.422993	-5.61135	2.00757e-08	1.2427e-06
chr20	58146902	58151902	ENSG00000124237.6	C20orf85	+	58150902	protein_coding	65.2153	-2.37268	0.404184	-5.87029	4.35021e-09	3.18931e-07
chr19	54648085	54653085	ENSG00000237323.1	ENSG00000237323	+	54652085	unprocessed_pseudogene	36.2418	-2.37259	0.559766	-4.23854	2.24978e-05	0.000581014
chr14	101029755	101034755	ENSG00000207743.3	MIR495	+	101033755	miRNA	48.5744	-2.37244	0.477116	-4.97247	6.61052e-07	2.76794e-05
chr20	23029785	23034785	ENSG00000230492.2	ENSG00000230492	-	23030785	lncRNA	35.9324	-2.37238	0.55229	-4.29554	1.74267e-05	0.000467965
chr16	1252059	1257059	ENSG00000095917.14	TPSD1	+	1256059	protein_coding	50.0938	-2.37234	0.426856	-5.55772	2.73319e-08	1.63784e-06
chr3	130175511	130180511	ENSG00000288111.2	ENSG00000288111	+	130179511	lncRNA	77.0681	-2.37201	0.417456	-5.68205	1.3309e-08	8.68615e-07
chr14	101060495	101065495	ENSG00000216179.1	MIR541	+	101064495	miRNA	66.1944	-2.37175	0.453888	-5.22542	1.7376e-07	8.51696e-06
chr9	134932524	134937524	ENSG00000236403.2	ENSG00000236403	+	134936524	lncRNA	32.5517	-2.37142	0.54766	-4.33009	1.49047e-05	0.000411655
chr16	78604488	78609488	ENSG00000288821.1	ENSG00000288821	+	78608488	lncRNA	11.0788	-2.37089	0.889608	-2.6651	0.00769659	0.0580206
chr11	124207707	124212707	ENSG00000255425.6	OR8G3P	+	124211707	protein_coding	40.6504	-2.37062	0.508784	-4.65938	3.17165e-06	0.000107714
chr17	4498674	4503674	ENSG00000229782.1	SPNS2-AS1	-	4499674	lncRNA	73.6975	-2.3701	0.46774	-5.06712	4.03873e-07	1.79365e-05
chr7	1455912	1460912	ENSG00000225981.3	MICALL2-DT	+	1459912	lncRNA	8.89431	-2.36993	0.986515	-2.40232	0.0162915	0.0950176
chrX	12145126	12150126	ENSG00000206795.1	Y_RNA	+	12149126	misc_RNA	14.9261	-2.36971	0.729914	-3.24655	0.00116812	0.0150609
chr7	156033564	156038564	ENSG00000289588.1	ENSG00000289588	-	156034564	lncRNA	91.4424	-2.36967	0.430576	-5.50348	3.72377e-08	2.17077e-06
chr1	166153798	166158798	ENSG00000215952.1	MIR921	-	166154798	miRNA	36.9222	-2.36963	0.620805	-3.81703	0.000135068	0.0026538
chr11	133528415	133533415	ENSG00000287068.1	ENSG00000287068	+	133532415	lncRNA	143.008	-2.36958	0.367577	-6.44648	1.14476e-10	1.22962e-08
chr6	48110078	48115078	ENSG00000286811.1	ENSG00000286811	-	48111078	lncRNA	17.7031	-2.36819	0.706875	-3.35022	0.000807465	0.0112857
chr19	41221051	41226051	ENSG00000269652.1	ENSG00000269652	-	41222051	lncRNA	74.3595	-2.36809	0.404752	-5.85074	4.89401e-09	3.53617e-07
chr16	79205739	79210739	ENSG00000277954.1	ENSG00000277954	-	79206739	lncRNA	30.6133	-2.36744	0.608514	-3.89052	0.000100028	0.00207896
chr14	105856572	105861572	ENSG00000265612.1	MIR4539	-	105857572	miRNA	29.5694	-2.36636	0.668469	-3.53997	0.000400168	0.00647124
chr19	11418328	11423328	ENSG00000205517.13	RGL3	-	11419328	protein_coding	25.7811	-2.3654	0.617562	-3.83023	0.000128025	0.00253953
chr11	64296358	64301358	ENSG00000219435.6	CATSPERZ	+	64300358	protein_coding	59.9728	-2.36392	0.399023	-5.92427	3.13692e-09	2.3812e-07
chr9	128064201	128069201	ENSG00000148339.13	SLC25A25	+	128068201	protein_coding	5.92685	-2.36358	1.23473	-1.91425	0.0555877	0.20488
chr4	74098196	74103196	ENSG00000081041.9	CXCL2	-	74099196	protein_coding	37.5026	-2.36355	0.50319	-4.69714	2.63831e-06	9.21551e-05
chr7	33731064	33736064	ENSG00000227481.1	ENSG00000227481	-	33732064	lncRNA	45.0267	-2.3634	0.484667	-4.87633	1.08077e-06	4.27447e-05
chr8	142194356	142199356	ENSG00000254008.1	LINC00051	+	142198356	lncRNA	19.7312	-2.363	0.643002	-3.67496	0.000237891	0.00424738
chr12	131454436	131459436	ENSG00000275232.1	ENSG00000275232	-	131455436	lncRNA	67.4549	-2.36178	0.384182	-6.14756	7.86856e-10	6.86715e-08
chr20	13217274	13222274	ENSG00000101230.6	ISM1	+	13221274	protein_coding	123.393	-2.36144	0.443172	-5.32849	9.90312e-08	5.22516e-06
chr17	41733644	41738644	ENSG00000173805.16	HAP1	-	41734644	protein_coding	55.5987	-2.36087	0.458463	-5.14954	2.61132e-07	1.22495e-05
chr15	98102761	98107761	ENSG00000259611.2	LINC01582	-	98103761	lncRNA	21.5594	-2.36006	0.642456	-3.67349	0.000239259	0.0042642
chrX	26656507	26661507	ENSG00000236160.1	ENSG00000236160	-	26657507	processed_pseudogene	12.8923	-2.36003	0.747841	-3.15579	0.00160063	0.0191795
chr9	75194071	75199071	ENSG00000212316.1	RNU6-1228P	+	75198071	snRNA	78.3028	-2.35938	0.481843	-4.89657	9.75227e-07	3.89857e-05
chrX	32098065	32103065	ENSG00000222922.1	RNA5SP501	+	32102065	rRNA_pseudogene	12.8281	-2.35915	0.893708	-2.63973	0.00829712	0.0609335
chr17	45217444	45222444	ENSG00000184922.15	FMNL1	+	45221444	protein_coding	27.3981	-2.35789	0.641769	-3.67405	0.000238739	0.00425857
chrX	138393351	138398351	ENSG00000252163.1	RN7SKP31	+	138397351	misc_RNA	19.1174	-2.35676	0.689065	-3.42023	0.000625682	0.00929452
chrX	37902147	37907147	ENSG00000259977.1	ENSG00000259977	+	37906147	lncRNA	32.1965	-2.35661	0.49958	-4.71717	2.39148e-06	8.4517e-05
chr7	193180	198180	ENSG00000240093.1	ENSG00000240093	-	194180	lncRNA	6.96093	-2.35608	1.58329	-1.48809	0.136726	0.348908
chr2	165793659	165798659	ENSG00000115339.14	GALNT3	-	165794659	protein_coding	41.7648	-2.35595	0.428641	-5.49632	3.87802e-08	2.2476e-06
chr8	7078971	7083971	ENSG00000255273.1	ENSG00000255273	+	7082971	processed_pseudogene	92.866	-2.35533	0.431216	-5.46206	4.70637e-08	2.6735e-06
chr3	192512831	192517831	ENSG00000226709.1	FGF12-AS3	+	192516831	lncRNA	94.6934	-2.35402	0.378818	-6.21412	5.16138e-10	4.69561e-08
chr19	9015344	9020344	ENSG00000267332.1	BOLA3P2	+	9019344	processed_pseudogene	19.9062	-2.35381	0.791321	-2.97453	0.00293438	0.0299952
chr4	30713369	30718369	ENSG00000288940.1	ENSG00000288940	+	30717369	lncRNA	25.6133	-2.35361	0.535514	-4.39505	1.10745e-05	0.000317523
chr8	121640440	121645440	ENSG00000170961.7	HAS2	-	121641440	protein_coding	64.228	-2.35352	0.4859	-4.84363	1.27491e-06	4.91399e-05
chr19	54336168	54341168	ENSG00000275210.1	ENSG00000275210	-	54337168	lncRNA	66.3991	-2.35327	0.439856	-5.35009	8.79085e-08	4.70025e-06
chr13	18610675	18615675	ENSG00000229788.1	LINC00388	-	18611675	lncRNA	5.74055	-2.35203	1.24596	-1.88773	0.0590624	0.212912
chr11	89781945	89786945	ENSG00000255162.1	ENSG00000255162	+	89785945	unprocessed_pseudogene	43.3466	-2.35124	0.524957	-4.47892	7.50232e-06	0.000227625
chr11	3476065	3481065	ENSG00000287906.1	ENSG00000287906	-	3477065	lncRNA	55.9195	-2.35119	0.469236	-5.01067	5.42404e-07	2.33631e-05
chr12	125979702	125984702	ENSG00000275212.3	LINC02826	+	125983702	lncRNA	23.0962	-2.35085	0.651369	-3.60909	0.000307276	0.0052163
chrX	52653900	52658900	ENSG00000187754.9	SSX7	-	52654900	protein_coding	20.3115	-2.35081	0.68393	-3.43721	0.000587742	0.00882481
chr14	104588847	104593847	ENSG00000259037.1	ENSG00000259037	-	104589847	lncRNA	25.3385	-2.3503	0.566355	-4.14987	3.32658e-05	0.000817272
chr18	76228927	76233927	ENSG00000266014.2	ENSG00000266014	+	76232927	lncRNA	63.2995	-2.35015	0.447472	-5.25206	1.50406e-07	7.51331e-06
chr7	68016235	68021235	ENSG00000225209.2	ENSG00000225209	+	68020235	lncRNA	23.0414	-2.35015	0.710386	-3.30826	0.000938763	0.0127125
chr17	77916098	77921098	ENSG00000238898.1	RNU1-80P	+	77920098	snRNA	58.6384	-2.35001	0.438299	-5.36166	8.24589e-08	4.45649e-06
chr11	89696764	89701764	ENSG00000255385.1	UBTFL10	+	89700764	processed_pseudogene	33.6121	-2.34963	0.536598	-4.37876	1.19355e-05	0.00033923
chr7	142295177	142300177	ENSG00000242736.1	TRBV1	+	142299177	TR_V_pseudogene	58.2024	-2.34957	0.465153	-5.05118	4.391e-07	1.93863e-05
chr22	19149292	19154292	ENSG00000063515.3	GSC2	-	19150292	protein_coding	55.819	-2.34914	0.436246	-5.38491	7.2482e-08	3.99276e-06
chr2	232521993	232526993	ENSG00000135902.10	CHRND	+	232525993	protein_coding	7.10961	-2.34879	1.14119	-2.0582	0.0395709	0.165979
chr13	89362224	89367224	ENSG00000225530.1	SP3P	-	89363224	processed_pseudogene	10.9084	-2.34863	0.929939	-2.52557	0.011551	0.0757582
chr9	81924428	81929428	ENSG00000189357.9	SPATA31D4	+	81928428	protein_coding	55.3693	-2.34817	0.465914	-5.03992	4.65732e-07	2.03971e-05
chr3	26618772	26623772	ENSG00000179796.13	LRRC3B	+	26622772	protein_coding	93.7291	-2.34741	0.488875	-4.80166	1.57353e-06	5.89584e-05
chr7	143518469	143523469	ENSG00000176510.5	OR10AC1	-	143519469	protein_coding	70.0904	-2.3466	0.470048	-4.99226	5.96756e-07	2.54305e-05
chr2	102429957	102434957	ENSG00000236525.1	ENSG00000236525	+	102433957	lncRNA	39.3437	-2.34588	0.49778	-4.71269	2.44466e-06	8.62439e-05
chr13	108300331	108305331	ENSG00000223177.1	RNA5SP39	-	108301331	rRNA_pseudogene	58.4255	-2.34552	0.500045	-4.69062	2.72372e-06	9.41427e-05
chr6	32737391	32742391	ENSG00000237541.4	HLA-DQA2	+	32741391	protein_coding	71.6846	-2.34513	0.447245	-5.24349	1.57564e-07	7.85129e-06
chr1	1115361	1120361	ENSG00000131591.18	C1orf159	-	1116361	protein_coding	35.8377	-2.34498	0.497923	-4.70952	2.48299e-06	8.74933e-05
chr2	222452126	222457126	ENSG00000228670.4	NANOGP2	-	222453126	processed_pseudogene	75.6307	-2.34478	0.415847	-5.63857	1.71466e-08	1.07806e-06
chr2	56184870	56189870	ENSG00000233251.8	ENSG00000233251	-	56185870	lncRNA	57.481	-2.34466	0.432543	-5.42064	5.93865e-08	3.31394e-06
chr2	209141241	209146241	ENSG00000232799.1	CRYGFP	+	209145241	unprocessed_pseudogene	77.5107	-2.34414	0.421844	-5.55689	2.74631e-08	1.64242e-06
chr17	20780645	20785645	ENSG00000226549.3	SCDP1	+	20784645	processed_pseudogene	11.6416	-2.34411	0.912933	-2.56767	0.0102385	0.0700663
chr2	222503843	222508843	ENSG00000234285.1	GAPDHP49	-	222504843	processed_pseudogene	67.1952	-2.34401	0.540453	-4.33713	1.44357e-05	0.000399804
chr6	49710325	49715325	ENSG00000235122.4	ENSG00000235122	+	49714325	lncRNA	28.4761	-2.34325	0.627737	-3.73285	0.000189327	0.00353261
chr9	83197957	83202957	ENSG00000273806.1	ENSG00000273806	+	83201957	processed_pseudogene	55.6372	-2.34299	0.405997	-5.77095	7.88261e-09	5.40918e-07
chr21	13720189	13725189	ENSG00000278618.1	MIR8069	+	13724189	miRNA	2.81448	-2.34284	1.74425	-1.34317	0.179215	NA
chr11	50053309	50058309	ENSG00000260595.1	OR4C49P	-	50054309	unprocessed_pseudogene	20.6201	-2.34278	0.846594	-2.7673	0.00565229	0.0473078
chr19	53697227	53702227	ENSG00000207722.1	MIR520B	+	53701227	miRNA	48.4583	-2.34219	0.511707	-4.57721	4.71223e-06	0.000152201
chr17	41117373	41122373	ENSG00000212721.4	KRTAP4-11	-	41118373	protein_coding	60.1041	-2.3418	0.50631	-4.62523	3.74182e-06	0.000124542
chr1	22559489	22564489	ENSG00000070886.12	EPHA8	+	22563489	protein_coding	88.9855	-2.34166	0.420368	-5.57049	2.54026e-08	1.52888e-06
chr11	70064371	70069371	ENSG00000248844.6	LINC02753	-	70065371	lncRNA	53.5486	-2.34095	0.469163	-4.98962	6.0497e-07	2.57076e-05
chr3	43033121	43038121	ENSG00000232375.1	ENSG00000232375	+	43037121	unprocessed_pseudogene	52.9813	-2.3408	0.482678	-4.8496	1.23711e-06	4.79452e-05
chr18	77430689	77435689	ENSG00000199392.1	ENSG00000199392	-	77431689	snoRNA	46.8094	-2.34004	0.537414	-4.35426	1.33515e-05	0.000374188
chr5	1964094	1969094	ENSG00000249731.1	ENSG00000249731	+	1968094	lncRNA	58.6573	-2.34004	0.458643	-5.1021	3.35909e-07	1.53146e-05
chr5	102137893	102142893	ENSG00000248261.2	ENSG00000248261	+	102141893	lncRNA	27.0487	-2.33984	0.542526	-4.31287	1.6115e-05	0.000438825
chrX	48305179	48310179	ENSG00000204648.11	SSX9P	-	48306179	transcribed_unprocessed_pseudogene	19.1199	-2.3397	0.624532	-3.74633	0.000179442	0.00337862
chr8	103496610	103501610	ENSG00000176406.24	RIMS2	+	103500610	protein_coding	48.7109	-2.33969	0.440826	-5.30751	1.11132e-07	5.74748e-06
chr2	222314275	222319275	ENSG00000237732.11	CT75	+	222318275	transcribed_unprocessed_pseudogene	57.4269	-2.33878	0.407683	-5.73676	9.65053e-09	6.49615e-07
chrX	21653301	21658301	ENSG00000288832.1	ENSG00000288832	-	21654301	lncRNA	10.2451	-2.33864	0.919602	-2.5431	0.0109875	0.0733918
chr11	124050793	124055793	ENSG00000213182.4	OR10D5P	+	124054793	unprocessed_pseudogene	55.0374	-2.33851	0.480526	-4.86656	1.13557e-06	4.45068e-05
chr11	106131116	106136116	ENSG00000254580.1	LINC02719	-	106132116	lncRNA	18.3549	-2.33737	0.747367	-3.12748	0.00176314	0.0206326
chr13	21669974	21674974	ENSG00000289860.1	ENSG00000289860	-	21670974	lncRNA	11.9094	-2.3368	0.908537	-2.57205	0.0101098	0.0695263
chr7	67623831	67628831	ENSG00000226392.1	MTATP6P21	+	67627831	unprocessed_pseudogene	27.2592	-2.33641	0.588142	-3.97254	7.11113e-05	0.00156231
chr2	95432133	95437133	ENSG00000227120.1	ENSG00000227120	+	95436133	processed_pseudogene	69.5657	-2.33631	0.438508	-5.32785	9.93812e-08	5.23902e-06
chr11	90061999	90066999	ENSG00000223709.6	TRIM64EP	-	90062999	unprocessed_pseudogene	34.9094	-2.33605	0.541909	-4.31078	1.62678e-05	0.000441062
chr19	54699952	54704952	ENSG00000228790.1	ENSG00000228790	+	54703952	unprocessed_pseudogene	52.8648	-2.33572	0.524095	-4.45667	8.32423e-06	0.000248296
chr8	19897717	19902717	ENSG00000175445.17	LPL	+	19901717	protein_coding	43.5914	-2.33536	0.497476	-4.69443	2.67358e-06	9.30621e-05
chr14	101061912	101066912	ENSG00000199092.4	MIR410	+	101065912	miRNA	61.463	-2.33501	0.452004	-5.16591	2.39269e-07	1.13034e-05
chr14	101061598	101066598	ENSG00000199025.4	MIR369	+	101065598	miRNA	61.8039	-2.33458	0.457535	-5.10252	3.35152e-07	1.52917e-05
chr4	9508905	9513905	ENSG00000249866.1	OR7E83P	+	9512905	unprocessed_pseudogene	71.1456	-2.33419	0.487772	-4.78541	1.70636e-06	6.30114e-05
chr2	222319155	222324155	ENSG00000288658.2	ENSG00000288658	-	222320155	protein_coding	67.1929	-2.33356	0.412263	-5.66038	1.51041e-08	9.61732e-07
chr13	78354328	78359328	ENSG00000200686.1	RNY3P3	-	78355328	misc_RNA	25.6691	-2.3331	0.632391	-3.68934	0.000224837	0.00405971
chr13	89162186	89167186	ENSG00000288552.1	ENSG00000288552	-	89163186	lncRNA	15.1219	-2.33265	0.783738	-2.97631	0.00291742	0.0298727
chr17	6654009	6659009	ENSG00000261996.1	ENSG00000261996	-	6655009	lncRNA	37.9815	-2.33211	0.511284	-4.56128	5.08424e-06	0.000162555
chr17	6775116	6780116	ENSG00000279296.1	PRAL	-	6776116	TEC	62.5806	-2.33192	0.424049	-5.49917	3.81588e-08	2.21667e-06
chr15	94227538	94232538	ENSG00000140563.16	MCTP2	+	94231538	protein_coding	34.0579	-2.33161	0.546611	-4.26557	1.99393e-05	0.000524414
chr1	34164842	34169842	ENSG00000121904.19	CSMD2	-	34165842	protein_coding	84.2537	-2.33149	0.424065	-5.49796	3.84212e-08	2.22895e-06
chr15	94725519	94730519	ENSG00000286917.1	ENSG00000286917	-	94726519	lncRNA	61.0606	-2.33144	0.488423	-4.77342	1.81128e-06	6.63149e-05
chrX	3267544	3272544	ENSG00000228459.5	LINC01546	+	3271544	lncRNA	58.9309	-2.32959	0.870962	-2.67473	0.00747886	0.0569794
chr8	54350168	54355168	ENSG00000276605.1	ENSG00000276605	+	54354168	processed_pseudogene	29.8776	-2.32906	0.550882	-4.22787	2.35917e-05	0.000606137
chr17	17587428	17592428	ENSG00000264666.3	ENSG00000264666	+	17591428	lncRNA	7.33043	-2.32884	1.16535	-1.9984	0.0456734	0.181461
chr9	130929851	130934851	ENSG00000236658.1	FIBCD1-AS1	+	130933851	lncRNA	57.182	-2.32803	0.422548	-5.5095	3.59855e-08	2.11213e-06
chr6	1227608	1232608	ENSG00000289842.1	ENSG00000289842	-	1228608	lncRNA	102.612	-2.32765	0.41183	-5.65197	1.58622e-08	1.00467e-06
chr16	85855521	85860521	ENSG00000279907.1	ENSG00000279907	+	85859521	TEC	55.9222	-2.32741	0.440322	-5.28571	1.25221e-07	6.35567e-06
chr10	49606310	49611310	ENSG00000187714.7	SLC18A3	+	49610310	protein_coding	78.1272	-2.32729	0.484659	-4.8019	1.57164e-06	5.8943e-05
chr3	64007692	64012692	ENSG00000271843.1	ENSG00000271843	-	64008692	lncRNA	6.57196	-2.32703	1.6255	-1.43158	0.152263	0.370652
chr20	38720486	38725486	ENSG00000101438.4	SLC32A1	+	38724486	protein_coding	160.354	-2.32638	0.330504	-7.0389	1.93768e-12	3.12758e-10
chr20	60474111	60479111	ENSG00000266140.1	MIR4533	+	60478111	miRNA	60.632	-2.32613	0.458177	-5.07693	3.83582e-07	1.71879e-05
chr10	122725429	122730429	ENSG00000176584.18	DMBT1L1	+	122729429	transcribed_unitary_pseudogene	66.4698	-2.32609	0.481447	-4.83146	1.35535e-06	5.1901e-05
chr2	94908432	94913432	ENSG00000233158.1	RPS24P6	+	94912432	processed_pseudogene	41.0563	-2.32589	0.494789	-4.70077	2.59177e-06	9.06879e-05
chr5	1858890	1863890	ENSG00000279222.1	ENSG00000279222	-	1859890	TEC	19.7424	-2.32548	0.770409	-3.0185	0.00254034	0.0270159
chr8	85710922	85715922	ENSG00000276006.1	REXO1L12P	+	85714922	processed_pseudogene	54.6604	-2.32529	0.414858	-5.60503	2.08216e-08	1.27895e-06
chr14	106605551	106610551	ENSG00000254395.1	IGHV4-55	-	106606551	IG_V_pseudogene	44.7495	-2.32492	0.506617	-4.58911	4.45145e-06	0.000144869
chr16	32810251	32815251	ENSG00000261719.1	ENSG00000261719	-	32811251	processed_pseudogene	72.7993	-2.32446	0.43133	-5.38905	7.08315e-08	3.91261e-06
chrX	131420301	131425301	ENSG00000234288.2	OR1AA1P	+	131424301	unprocessed_pseudogene	39.6138	-2.32409	0.537804	-4.32145	1.55007e-05	0.000425765
chr19	56172008	56177008	ENSG00000197487.9	GALP	+	56176008	protein_coding	59.5315	-2.3238	0.493669	-4.7072	2.51147e-06	8.82379e-05
chr5	54874238	54879238	ENSG00000249843.1	ENSG00000249843	+	54878238	processed_pseudogene	50.1986	-2.32244	0.462995	-5.01612	5.27268e-07	2.27437e-05
chr6	170131374	170136374	ENSG00000288162.1	ENSG00000288162	+	170135374	lncRNA	18.1915	-2.32034	0.672035	-3.45271	0.000554984	0.00841502
chrX	147278344	147283344	ENSG00000207868.1	MIR514A1	-	147279344	miRNA	11.6243	-2.32033	1.02256	-2.26913	0.0232603	0.119228
chr11	96999711	97004711	ENSG00000255205.1	MED28P5	-	97000711	processed_pseudogene	43.4289	-2.3189	0.518966	-4.4683	7.88441e-06	0.00023718
chr9	135703498	135708498	ENSG00000165643.11	SOHLH1	-	135704498	protein_coding	41.1555	-2.31886	0.570333	-4.06579	4.78694e-05	0.0011197
chr19	51138299	51143299	ENSG00000168995.13	SIGLEC7	+	51142299	protein_coding	105.283	-2.31859	0.366121	-6.33284	2.40689e-10	2.40465e-08
chr16	564837	569837	ENSG00000282907.1	ENSG00000282907	+	568837	lncRNA	4.94432	-2.3181	1.41708	-1.63583	0.101874	0.294778
chr13	104810327	104815327	ENSG00000225823.1	RPL7P45	+	104814327	processed_pseudogene	21.3681	-2.31791	0.623827	-3.71563	0.000202698	0.00372994
chr11	89883366	89888366	ENSG00000254617.1	ENSG00000254617	+	89887366	unprocessed_pseudogene	32.7567	-2.31614	0.566621	-4.08763	4.35802e-05	0.00103306
chr4	46989723	46994723	ENSG00000163288.14	GABRB1	+	46993723	protein_coding	45.5516	-2.3161	0.568776	-4.07207	4.65965e-05	0.00109419
chr18	10657933	10662933	ENSG00000260779.1	ENSG00000260779	+	10661933	lncRNA	50.5953	-2.31567	0.487767	-4.74749	2.05955e-06	7.42726e-05
chr7	142107718	142112718	ENSG00000257743.9	MGAM2	+	142111718	protein_coding	62.8224	-2.31508	0.444024	-5.21386	1.84949e-07	8.99923e-06
chrX	121025563	121030563	ENSG00000233433.1	CBLL1P1	-	121026563	processed_pseudogene	32.8608	-2.31455	0.58544	-3.95351	7.70123e-05	0.00166816
chr15	78336353	78341353	ENSG00000166426.8	CRABP1	+	78340353	protein_coding	144.127	-2.31435	0.34826	-6.64546	3.02273e-11	3.71919e-09
chr8	7757330	7762330	ENSG00000285607.1	FAM90A9	+	7761330	protein_coding	52.399	-2.3138	0.490728	-4.71504	2.41658e-06	8.53536e-05
chr11	17472595	17477595	ENSG00000287898.1	ENSG00000287898	+	17476595	lncRNA	15.5272	-2.31274	0.781119	-2.96081	0.00306834	0.0309901
chr14	23407273	23412273	ENSG00000197616.13	MYH6	-	23408273	protein_coding	76.5237	-2.31267	0.390345	-5.92469	3.12885e-09	2.37809e-07
chr4	149153175	149158175	ENSG00000250252.2	LINC02430	-	149154175	lncRNA	44.8303	-2.31168	0.481746	-4.79853	1.59832e-06	5.96455e-05
chrX	145626218	145631218	ENSG00000231093.1	TRMT1P1	+	145630218	processed_pseudogene	10.9708	-2.31165	0.777804	-2.97202	0.00295848	0.0301799
chr6	39349747	39354747	ENSG00000218986.1	ENSG00000218986	+	39353747	processed_pseudogene	71.669	-2.31067	0.430755	-5.36422	8.12975e-08	4.40165e-06
chr11	104869264	104874264	ENSG00000254569.1	ENSG00000254569	+	104873264	unprocessed_pseudogene	21.3077	-2.31027	0.608861	-3.79441	0.000147994	0.00287392
chr12	4117132	4122132	ENSG00000242444.3	ENSG00000242444	-	4118132	transcribed_processed_pseudogene	94.2697	-2.3101	0.377979	-6.11171	9.85721e-10	8.39527e-08
chrX	90596340	90601340	ENSG00000207515.1	RNU6-555P	-	90597340	snRNA	5.30242	-2.31	1.23332	-1.87299	0.0610695	0.217551
chr7	157983169	157988169	ENSG00000285821.1	ENSG00000285821	+	157987169	lncRNA	84.7706	-2.30982	0.399497	-5.78183	7.38917e-09	5.13513e-07
chr14	79632311	79637311	ENSG00000259106.1	ENSG00000259106	-	79633311	lncRNA	38.5612	-2.30976	0.586176	-3.94039	8.13495e-05	0.00174635
chr19	40713112	40718112	ENSG00000086544.4	ITPKC	+	40717112	protein_coding	6.46342	-2.30938	1.23298	-1.873	0.0610681	0.217551
chr7	72915205	72920205	ENSG00000289042.1	ENSG00000289042	+	72919205	lncRNA	7.11111	-2.30902	1.16386	-1.98393	0.0472638	0.185678
chr21	39863438	39868438	ENSG00000183036.11	PCP4	+	39867438	protein_coding	30.0784	-2.30821	0.608752	-3.79171	0.000149611	0.00290062
chr12	3365177	3370177	ENSG00000250770.5	ENSG00000250770	-	3366177	transcribed_unprocessed_pseudogene	81.4818	-2.30782	0.390935	-5.90335	3.56195e-09	2.67009e-07
chr16	86191954	86196954	ENSG00000269186.4	LINC01082	+	86195954	lncRNA	10.3584	-2.30759	0.888292	-2.59778	0.00938285	0.066255
chr6	146635700	146640700	ENSG00000207431.2	RNU6-906P	+	146639700	snRNA	36.6679	-2.30684	0.507863	-4.54225	5.56561e-06	0.000175056
chr5	39423868	39428868	ENSG00000289699.1	ENSG00000289699	-	39424868	lncRNA	15.1503	-2.30677	0.740234	-3.11627	0.00183154	0.0212223
chr10	103489705	103494705	ENSG00000107954.11	NEURL1	+	103493705	protein_coding	51.8964	-2.30653	0.449559	-5.13065	2.88746e-07	1.34261e-05
chr11	61525602	61530602	ENSG00000279878.1	ENSG00000279878	-	61526602	TEC	159.376	-2.30638	0.325009	-7.09636	1.28089e-12	2.13046e-10
chr11	56331142	56336142	ENSG00000255134.1	OR8K2P	+	56335142	unprocessed_pseudogene	23.5711	-2.3062	0.693939	-3.32335	0.000889422	0.0121845
chr8	132564246	132569246	ENSG00000253521.2	HPYR1	-	132565246	lncRNA	76.1043	-2.30571	0.395688	-5.82709	5.64036e-09	4.02699e-07
chr12	45050099	45055099	ENSG00000185610.6	DBX2	-	45051099	protein_coding	35.7444	-2.30568	0.449822	-5.12577	2.96329e-07	1.36762e-05
chr13	102899339	102904339	ENSG00000278445.1	ENSG00000278445	+	102903339	lncRNA	44.2122	-2.30501	0.444635	-5.18405	2.17115e-07	1.03876e-05
chr13	109911096	109916096	ENSG00000201161.1	RN7SKP10	+	109915096	misc_RNA	47.743	-2.30495	0.525548	-4.38581	1.15553e-05	0.000329452
chr13	109396696	109401696	ENSG00000229792.1	LINC00399	+	109400696	lncRNA	23.0109	-2.30468	0.621473	-3.70841	0.000208562	0.0038133
chr10	35640252	35645252	ENSG00000284265.1	MIR4683	-	35641252	miRNA	19.6379	-2.30459	0.632485	-3.6437	0.000268742	0.00468128
chr14	106642585	106647585	ENSG00000253132.1	IGHV3-62	-	106643585	IG_V_pseudogene	28.5041	-2.30422	0.549551	-4.19292	2.75384e-05	0.000692428
chr12	85781444	85786444	ENSG00000258206.1	ENSG00000258206	-	85782444	processed_pseudogene	24.7774	-2.30416	0.612239	-3.7635	0.000167553	0.0031908
chrX	145993351	145998351	ENSG00000216075.1	MIR890	-	145994351	miRNA	14.794	-2.30385	0.802197	-2.87193	0.00407978	0.0377835
chr7	72446151	72451151	ENSG00000183166.11	CALN1	-	72447151	protein_coding	74.3014	-2.30384	0.418528	-5.50463	3.69951e-08	2.16083e-06
chr1	98044351	98049351	ENSG00000284247.1	MIR2682	-	98045351	miRNA	106.865	-2.30372	0.734906	-3.13471	0.00172025	0.020273
chr16	6033210	6038210	ENSG00000280000.1	ENSG00000280000	+	6037210	TEC	13.2849	-2.30322	0.847684	-2.71708	0.00658609	0.0523675
chr22	22900850	22905850	ENSG00000211678.2	IGLJ3	+	22904850	IG_J_gene	302.089	-2.30313	0.328549	-7.01001	2.38304e-12	3.76546e-10
chr6	146597931	146602931	ENSG00000237468.2	ADGB-DT	-	146598931	lncRNA	37.9703	-2.30241	0.542567	-4.24354	2.2002e-05	0.000570419
chr16	17401678	17406678	ENSG00000286849.1	ENSG00000286849	+	17405678	lncRNA	41.828	-2.30151	0.484253	-4.7527	2.00723e-06	7.2779e-05
chr16	78795362	78800362	ENSG00000286894.1	ENSG00000286894	-	78796362	lncRNA	9.18177	-2.30051	1.04016	-2.21168	0.026989	0.130751
chr3	14806853	14811853	ENSG00000154783.12	FGD5	+	14810853	protein_coding	92.5214	-2.29971	0.380546	-6.0432	1.51087e-09	1.24442e-07
chr2	217063818	217068818	ENSG00000287498.1	ENSG00000287498	-	217064818	lncRNA	55.2674	-2.29961	0.473248	-4.85921	1.17854e-06	4.60107e-05
chr6	170460595	170465595	ENSG00000288970.1	ENSG00000288970	+	170464595	lncRNA	45.0931	-2.29946	0.451225	-5.09605	3.46815e-07	1.57282e-05
chr21	44682358	44687358	ENSG00000276647.1	KRTAP12-6P	+	44686358	processed_pseudogene	86.6657	-2.29943	0.391253	-5.87708	4.17564e-09	3.08771e-07
chr12	5039879	5044879	ENSG00000130037.5	KCNA5	+	5043879	protein_coding	96.4943	-2.29843	0.439039	-5.23513	1.64871e-07	8.15445e-06
chr12	128112730	128117730	ENSG00000256659.2	LINC02368	+	128116730	lncRNA	26.7388	-2.29832	0.638473	-3.59971	0.000318569	0.00537157
chr7	71684747	71689747	ENSG00000199940.1	RN7SKP75	-	71685747	misc_RNA	33.3075	-2.29758	0.580034	-3.96112	7.45993e-05	0.00162409
chr20	32004351	32009351	ENSG00000252623.1	RNA5SP481	+	32008351	rRNA_pseudogene	41.6897	-2.29606	0.485413	-4.7301	2.24404e-06	7.98703e-05
chrX	38219924	38224924	ENSG00000101955.15	SRPX	-	38220924	protein_coding	39.306	-2.29535	0.432306	-5.30955	1.09899e-07	5.69842e-06
chr8	7252904	7257904	ENSG00000230045.4	FAM90A15P	+	7256904	protein_coding	42.1038	-2.29531	0.519011	-4.42248	9.75748e-06	0.000285516
chr1	29904357	29909357	ENSG00000270927.1	ENSG00000270927	-	29905357	processed_pseudogene	30.1747	-2.2949	0.555404	-4.13195	3.59692e-05	0.000874115
chr9	130261760	130266760	ENSG00000148357.18	HMCN2	+	130265760	protein_coding	71.0434	-2.29426	0.407739	-5.6268	1.83581e-08	1.14822e-06
chrX	52594494	52599494	ENSG00000185319.5	SSXP4	+	52598494	unprocessed_pseudogene	40.2204	-2.29402	0.535932	-4.28044	1.86521e-05	0.000495552
chr8	7275770	7280770	ENSG00000223885.4	FAM90A13P	+	7279770	protein_coding	68.5168	-2.29367	0.397706	-5.76724	8.05786e-09	5.51683e-07
chr20	44884604	44889604	ENSG00000286100.1	ENSG00000286100	-	44885604	lncRNA	6.22087	-2.29227	1.28422	-1.78495	0.0742695	0.244984
chr2	217974707	217979707	ENSG00000223923.2	TNS1-AS1	+	217978707	lncRNA	46.0541	-2.2913	0.477871	-4.79482	1.62823e-06	6.06109e-05
chr18	72747952	72752952	ENSG00000252598.1	RNA5SP460	+	72751952	rRNA_pseudogene	49.8857	-2.29092	0.480831	-4.76451	1.89315e-06	6.89759e-05
chr13	112330225	112335225	ENSG00000223626.1	LINC01044	-	112331225	lncRNA	59.435	-2.29039	0.447679	-5.11615	3.11831e-07	1.43037e-05
chr18	11322270	11327270	ENSG00000263682.1	ENSG00000263682	+	11326270	unprocessed_pseudogene	24.6139	-2.28939	0.627369	-3.64919	0.00026307	0.00460384
chr21	41580319	41585319	ENSG00000223400.1	ENSG00000223400	-	41581319	lncRNA	26.4138	-2.28794	0.604442	-3.78522	0.000153576	0.00295934
chr14	105896987	105901987	ENSG00000211918.1	IGHD2-15	-	105897987	IG_D_gene	49.5426	-2.28778	0.569966	-4.01389	5.97259e-05	0.00134768
chr3	189627389	189632389	ENSG00000073282.14	TP63	+	189631389	protein_coding	42.8904	-2.28759	0.515716	-4.43576	9.17479e-06	0.000270173
chr5	159465291	159470291	ENSG00000253298.2	LINC01845	-	159466291	lncRNA	59.3528	-2.28684	0.43264	-5.28577	1.25174e-07	6.35567e-06
chr7	158533495	158538495	ENSG00000225365.1	ENSG00000225365	+	158537495	lncRNA	42.8525	-2.28615	0.507765	-4.50238	6.71954e-06	0.000206589
chr14	101061447	101066447	ENSG00000199012.2	MIR412	+	101065447	miRNA	62.6038	-2.28438	0.461332	-4.9517	7.35697e-07	3.03603e-05
chr17	37608472	37613472	ENSG00000275066.5	SYNRG	-	37609472	protein_coding	6.06135	-2.28404	1.34337	-1.70023	0.0890873	0.273033
chr1	47684463	47689463	ENSG00000227947.2	LINC01738	+	47688463	lncRNA	22.0623	-2.28228	0.613653	-3.71917	0.00019988	0.00369053
chr12	89349798	89354798	ENSG00000286608.1	ENSG00000286608	+	89353798	lncRNA	25.6758	-2.28227	0.658594	-3.46537	0.000529493	0.00810109
chr11	118087299	118092299	ENSG00000255274.10	SMIM35	-	118088299	protein_coding	72.4459	-2.28202	0.388461	-5.87451	4.24088e-09	3.12441e-07
chr2	7748277	7753277	ENSG00000290050.1	ENSG00000290050	-	7749277	lncRNA	22.0349	-2.28172	0.768678	-2.96836	0.0029939	0.0303915
chrX	83748939	83753939	ENSG00000215102.2	TERF1P4	-	83749939	processed_pseudogene	15.6791	-2.28167	0.735805	-3.10092	0.00192923	0.022031
chr19	53667968	53672968	ENSG00000221017.1	MIR1323	+	53671968	miRNA	30.4246	-2.28108	0.564376	-4.04177	5.305e-05	0.00122137
chr20	62426539	62431539	ENSG00000130701.4	RBBP8NL	-	62427539	protein_coding	23.8229	-2.28065	0.612863	-3.72131	0.00019819	0.00366834
chrX	135801787	135806787	ENSG00000278289.5	CT45A6	-	135802787	protein_coding	47.4393	-2.27911	0.491751	-4.63467	3.57507e-06	0.000119522
chr1	208243384	208248384	ENSG00000076356.7	PLXNA2	-	208244384	protein_coding	27.4797	-2.27901	0.55486	-4.10736	4.0021e-05	0.00095738
chr17	28661189	28666189	ENSG00000132581.10	SDF2	-	28662189	protein_coding	4.85348	-2.27887	1.26819	-1.79694	0.0723448	0.241366
chr16	86508099	86513099	ENSG00000268388.6	FENDRR	-	86509099	lncRNA	3.78959	-2.27848	1.28938	-1.76711	0.0772092	NA
chr6	83708691	83713691	ENSG00000065609.15	SNAP91	-	83709691	protein_coding	46.0686	-2.27806	0.415494	-5.48277	4.18729e-08	2.40595e-06
chr7	155395922	155400922	ENSG00000260426.1	ENSG00000260426	+	155399922	lncRNA	41.9201	-2.27789	0.498418	-4.57025	4.87151e-06	0.00015642
chr7	142932746	142937746	ENSG00000127412.7	TRPV5	-	142933746	protein_coding	54.1938	-2.27758	0.481648	-4.72873	2.25931e-06	8.03662e-05
chr2	95521345	95526345	ENSG00000229689.4	ENSG00000229689	+	95525345	transcribed_unprocessed_pseudogene	45.6615	-2.27727	0.526949	-4.32161	1.54892e-05	0.000425644
chr8	85645325	85650325	ENSG00000270971.2	REXO1L8P	-	85646325	processed_pseudogene	374.661	-2.2771	0.277523	-8.20509	2.3041e-16	8.53998e-14
chrX	123116781	123121781	ENSG00000224236.3	MRRFP1	-	123117781	processed_pseudogene	18.8493	-2.27695	0.639939	-3.55807	0.000373593	0.00611726
chr8	80748693	80753693	ENSG00000212429.1	RNU11-6P	-	80749693	snRNA	32.7848	-2.27691	0.604492	-3.76665	0.000165453	0.00315681
chr4	73777060	73782060	ENSG00000249051.2	ENSG00000249051	-	73778060	processed_pseudogene	33.2695	-2.2766	0.517399	-4.40008	1.08209e-05	0.00031147
chr8	132480095	132485095	ENSG00000184156.17	KCNQ3	-	132481095	protein_coding	117.442	-2.27647	0.352984	-6.44922	1.1243e-10	1.21198e-08
chr18	13500289	13505289	ENSG00000267366.1	ENSG00000267366	-	13501289	lncRNA	31.4716	-2.27536	0.531941	-4.27747	1.8903e-05	0.000501552
chr13	78757175	78762175	ENSG00000237109.1	RPL21P111	+	78761175	processed_pseudogene	50.9278	-2.2752	0.476928	-4.77053	1.83746e-06	6.71097e-05
chr1	210233047	210238047	ENSG00000203706.9	SERTAD4-AS1	-	210234047	lncRNA	76.0905	-2.27515	0.405918	-5.60495	2.08316e-08	1.27895e-06
chr8	71843412	71848412	ENSG00000178860.9	MSC	-	71844412	protein_coding	22.6227	-2.27442	0.598438	-3.8006	0.000144346	0.00280944
chr14	76825246	76830246	ENSG00000013523.11	ANGEL1	-	76826246	protein_coding	93.5898	-2.27436	0.389701	-5.83618	5.34125e-09	3.84084e-07
chr1	94274068	94279068	ENSG00000137962.13	ARHGAP29	-	94275068	protein_coding	50.9872	-2.27348	0.497525	-4.56959	4.88681e-06	0.000156744
chrX	22523835	22528835	ENSG00000201095.1	RNU6-266P	+	22527835	snRNA	20.0292	-2.27281	0.695823	-3.26636	0.00108939	0.0142664
chr1	2556031	2561031	ENSG00000238164.6	TNFRSF14-AS1	-	2557031	lncRNA	37.7337	-2.27139	0.490457	-4.63118	3.63594e-06	0.000121422
chr2	26557756	26562756	ENSG00000115155.19	OTOF	-	26558756	protein_coding	78.5207	-2.27136	0.424984	-5.34458	9.06279e-08	4.83703e-06
chr10	69568906	69573906	ENSG00000236154.3	ENSG00000236154	+	69572906	lncRNA	26.9692	-2.27035	0.585163	-3.87986	0.000104517	0.00215658
chr18	25298126	25303126	ENSG00000264434.2	ENSG00000264434	+	25302126	lncRNA	35.4157	-2.26912	0.592969	-3.82671	0.000129868	0.00256759
chr11	107017476	107022476	ENSG00000152402.11	GUCY1A2	-	107018476	protein_coding	35.1213	-2.26886	0.56621	-4.00709	6.14705e-05	0.00138082
chr2	218658655	218663655	ENSG00000115568.16	ZNF142	-	218659655	protein_coding	7.21149	-2.26783	1.19497	-1.89781	0.057721	0.209541
chrX	81359268	81364268	ENSG00000231875.1	ENSG00000231875	+	81363268	processed_pseudogene	5.38991	-2.26728	1.21024	-1.87341	0.0610115	0.217437
chr2	209073148	209078148	ENSG00000235864.1	HSPA8P6	-	209074148	processed_pseudogene	49.6081	-2.26656	0.431023	-5.25856	1.45188e-07	7.27079e-06
chrX	121867869	121872869	ENSG00000260585.1	ENSG00000260585	+	121871869	lncRNA	13.6003	-2.26607	0.749319	-3.02417	0.00249315	0.0266746
chr20	62529957	62534957	ENSG00000289548.2	ENSG00000289548	+	62533957	lncRNA	39.2298	-2.2657	0.490798	-4.61635	3.90541e-06	0.000129128
chr17	49128460	49133460	ENSG00000167080.9	B4GALNT2	+	49132460	protein_coding	51.9014	-2.26528	0.479614	-4.72312	2.32256e-06	8.23401e-05
chr8	23742042	23747042	ENSG00000254002.4	ENSG00000254002	-	23743042	lncRNA	49.9889	-2.26513	0.422181	-5.3653	8.08128e-08	4.37935e-06
chr22	22896976	22901976	ENSG00000211677.2	IGLC2	+	22900976	IG_C_gene	157.426	-2.26498	0.359819	-6.29477	3.07848e-10	2.98618e-08
chr15	97522442	97527442	ENSG00000259664.3	LINC02254	-	97523442	lncRNA	34.1169	-2.26467	0.561412	-4.03387	5.48652e-05	0.0012569
chr7	56159145	56164145	ENSG00000230191.1	IFITM3P4	+	56163145	processed_pseudogene	50.2127	-2.2646	0.526818	-4.29864	1.71848e-05	0.000462789
chr17	6654509	6659509	ENSG00000264468.1	MIR4520-1	-	6655509	miRNA	42.4558	-2.26395	0.501318	-4.51599	6.30211e-06	0.000194752
chr14	101045550	101050550	ENSG00000207646.1	MIR655	+	101049550	miRNA	82.0872	-2.26392	0.44653	-5.07002	3.97769e-07	1.77296e-05
chr5	1197595	1202595	ENSG00000174358.16	SLC6A19	+	1201595	protein_coding	45.8521	-2.26338	0.514202	-4.40174	1.07387e-05	0.000309553
chr4	621573	626573	ENSG00000133256.13	PDE6B	+	625573	protein_coding	23.6491	-2.26327	0.623706	-3.62874	0.000284809	0.00490705
chr8	36780324	36785324	ENSG00000215262.8	KCNU1	+	36784324	protein_coding	49.8371	-2.26323	0.478438	-4.73044	2.24029e-06	7.9784e-05
chr2	224038318	224043318	ENSG00000135919.14	SERPINE2	-	224039318	protein_coding	109.571	-2.26313	0.362584	-6.24167	4.32923e-10	4.02926e-08
chrX	1332616	1337616	ENSG00000185291.12	IL3RA	+	1336616	protein_coding	30.7745	-2.26311	0.539243	-4.19682	2.70689e-05	0.00068291
chr16	71425464	71430464	ENSG00000261348.2	LINC02136	-	71426464	lncRNA	43.3744	-2.26288	0.442384	-5.11519	3.13432e-07	1.43662e-05
chr3	68633356	68638356	ENSG00000244640.1	RPLP0P8	-	68634356	processed_pseudogene	41.2993	-2.26274	0.529657	-4.27209	1.93653e-05	0.000510884
chr4	173912252	173917252	ENSG00000250043.1	ENSG00000250043	-	173913252	lncRNA	17.9485	-2.26224	0.727523	-3.10951	0.00187398	0.021577
chr20	13999508	14004508	ENSG00000230935.1	RPS3P1	+	14003508	processed_pseudogene	54.5396	-2.26203	0.496693	-4.55419	5.25878e-06	0.000166979
chr5	170759350	170764350	ENSG00000094755.17	GABRP	+	170763350	protein_coding	58.6106	-2.2616	0.45496	-4.97098	6.66136e-07	2.78728e-05
chr19	54886673	54891673	ENSG00000268734.1	ENSG00000268734	+	54890673	lncRNA	37.2487	-2.2615	0.515944	-4.38323	1.1693e-05	0.000332905
chr5	147509068	147514068	ENSG00000113657.13	DPYSL3	-	147510068	protein_coding	88.4227	-2.25987	0.471361	-4.79435	1.63204e-06	6.07151e-05
chr13	101778048	101783048	ENSG00000201155.1	RNU1-24P	-	101779048	snRNA	68.911	-2.25986	0.450064	-5.02119	5.13519e-07	2.22145e-05
chr2	131383061	131388061	ENSG00000237910.1	MTCO1P18	-	131384061	unprocessed_pseudogene	47.3887	-2.25865	0.464098	-4.86675	1.13447e-06	4.45068e-05
chr11	105193946	105198946	ENSG00000254767.1	OR2AL1P	-	105194946	unprocessed_pseudogene	29.341	-2.25859	0.608303	-3.71294	0.000204865	0.0037629
chr4	148441703	148446703	ENSG00000287292.1	ENSG00000287292	+	148445703	lncRNA	19.0992	-2.25852	0.645921	-3.49659	0.000471245	0.00737307
chr12	131362660	131367660	ENSG00000256484.1	ENSG00000256484	+	131366660	lncRNA	86.0017	-2.2584	0.436206	-5.17737	2.25031e-07	1.07321e-05
chr12	126510711	126515711	ENSG00000255853.1	ENSG00000255853	-	126511711	processed_pseudogene	29.337	-2.25757	0.663331	-3.40339	0.00066556	0.00973991
chr4	992440	997440	ENSG00000145217.14	SLC26A1	-	993440	protein_coding	23.9748	-2.25593	0.637532	-3.53854	0.000402341	0.00649936
chr21	44246813	44251813	ENSG00000232010.1	DNMT3L-AS1	+	44250813	lncRNA	32.3202	-2.2556	0.537145	-4.19924	2.67813e-05	0.000676221
chr6	46651830	46656830	ENSG00000146233.8	CYP39A1	-	46652830	protein_coding	18.8849	-2.25521	0.711433	-3.16996	0.00152462	0.0184752
chr9	97849226	97854226	ENSG00000178919.9	FOXE1	+	97853226	protein_coding	44.1835	-2.25447	0.483518	-4.66263	3.12195e-06	0.000106222
chr19	590300	595300	ENSG00000267036.2	ENSG00000267036	-	591300	processed_pseudogene	35.1654	-2.25416	0.508097	-4.43648	9.1443e-06	0.000269676
chr1	24320901	24325901	ENSG00000232298.2	GRHL3-AS1	-	24321901	lncRNA	36.2116	-2.25405	0.55467	-4.06376	4.8288e-05	0.00112745
chr17	41177221	41182221	ENSG00000244537.3	KRTAP4-2	-	41178221	protein_coding	69.4901	-2.25276	0.43251	-5.20857	1.90297e-07	9.24448e-06
chr12	92854079	92859079	ENSG00000258012.1	ENSG00000258012	+	92858079	processed_pseudogene	6.00702	-2.25183	1.26731	-1.77686	0.0755908	0.24721
chr2	95021677	95026677	ENSG00000172005.11	MAL	+	95025677	protein_coding	25.7261	-2.25093	0.560997	-4.01238	6.01098e-05	0.00135482
chrX	100150340	100155340	ENSG00000236988.2	CTDSPL2P1	-	100151340	processed_pseudogene	21.1273	-2.25079	0.639703	-3.51849	0.000434015	0.00691063
chr5	112415583	112420583	ENSG00000278921.2	EPB41L4A-DT	+	112419583	lncRNA	21.6171	-2.25012	0.609793	-3.68997	0.000224277	0.00405373
chr7	116210511	116215511	ENSG00000279086.1	ENSG00000279086	-	116211511	TEC	33.1222	-2.25	0.491881	-4.57427	4.7788e-06	0.000153854
chr16	26031811	26036811	ENSG00000230330.1	HMGN2P3	-	26032811	processed_pseudogene	29.1394	-2.24979	0.617838	-3.64139	0.000271168	0.00470988
chrX	152765764	152770764	ENSG00000286051.1	MAGEA6-DT	+	152769764	lncRNA	20.0379	-2.24972	0.609345	-3.69203	0.00022247	0.00402591
chr11	90067136	90072136	ENSG00000255011.1	ENSG00000255011	+	90071136	unprocessed_pseudogene	33.0963	-2.24944	0.581891	-3.86574	0.000110755	0.00226438
chr1	5488978	5493978	ENSG00000260972.1	ENSG00000260972	+	5492978	lncRNA	83.4324	-2.24783	0.40667	-5.52741	3.24991e-08	1.91687e-06
chr22	37803905	37808905	ENSG00000100116.17	GCAT	+	37807905	protein_coding	16.9204	-2.24765	0.770422	-2.91743	0.00352934	0.0342241
chr5	42467868	42472868	ENSG00000248873.1	SERBP1P6	-	42468868	processed_pseudogene	37.7637	-2.24749	0.570828	-3.93724	8.24241e-05	0.001765
chrX	53336973	53341973	ENSG00000236571.1	ENSG00000236571	-	53337973	processed_pseudogene	32.8602	-2.24681	0.552935	-4.06342	4.83591e-05	0.00112808
chrX	53336986	53341986	ENSG00000234413.1	MPV17L2P1	+	53340986	processed_pseudogene	32.8602	-2.24681	0.552935	-4.06342	4.83591e-05	0.00112808
chr7	101179293	101184293	ENSG00000167011.9	NAT16	-	101180293	protein_coding	18.0089	-2.2468	0.601943	-3.73258	0.000189528	0.00353527
chr2	33839678	33844678	ENSG00000235064.1	SLC25A5P2	-	33840678	processed_pseudogene	40.5405	-2.24675	0.57114	-3.93381	8.36109e-05	0.0017866
chr5	20304448	20309448	ENSG00000214132.4	ENSG00000214132	-	20305448	processed_pseudogene	17.0786	-2.24675	0.796293	-2.82151	0.00477977	0.0421992
chr16	89051975	89056975	ENSG00000256982.3	ENSG00000256982	-	89052975	lncRNA	31.6755	-2.24497	0.614403	-3.6539	0.000258291	0.00453474
chr5	8568047	8573047	ENSG00000279097.1	ENSG00000279097	+	8572047	TEC	60.1876	-2.24483	0.547239	-4.1021	4.09425e-05	0.000978253
chr9	68605125	68610125	ENSG00000224025.2	ENSG00000224025	+	68609125	processed_pseudogene	83.6935	-2.24476	0.44982	-4.99034	6.02721e-07	2.56483e-05
chr20	22216554	22221554	ENSG00000234862.1	ENSG00000234862	+	22220554	lncRNA	65.0537	-2.24426	0.444881	-5.04464	4.54374e-07	1.99433e-05
chr5	17586523	17591523	ENSG00000250088.1	ENSG00000250088	-	17587523	processed_pseudogene	115.069	-2.24406	0.333597	-6.72685	1.73376e-11	2.26309e-09
chr11	2148603	2153603	ENSG00000284779.3	ENSG00000284779	-	2149603	protein_coding	37.2112	-2.24359	0.507229	-4.42323	9.7237e-06	0.000284805
chr8	141510638	141515638	ENSG00000226490.2	ENSG00000226490	+	141514638	protein_coding	82.4034	-2.24358	0.41204	-5.44506	5.1789e-08	2.92612e-06
chr17	10517542	10522542	ENSG00000109061.10	MYH1	-	10518542	protein_coding	60.2429	-2.24349	0.432199	-5.19089	2.09296e-07	1.00536e-05
chr5	36648347	36653347	ENSG00000274441.1	ENSG00000274441	-	36649347	lncRNA	7.23922	-2.24336	1.3932	-1.61022	0.107351	0.303747
chr10	4047726	4052726	ENSG00000236990.1	ENSG00000236990	+	4051726	lncRNA	38.8321	-2.24304	0.608104	-3.68858	0.000225509	0.00406742
[truncated: 59,233 more rows]
[truncated: 1 more columns]

## Sheet: JARID2_Mock_CUTRUN
Chr	Start	End	Ensembl	Gene	Strand	TSS	Type	baseMean	log2FoldChange	lfcSE	stat	pvalue	padj
chr9	29210299	29215299	ENSG00000287038.3	ENSG00000287038	+	29214299	lncRNA	45.0935	-4.27707	0.55368	-7.7248	1.12e-14	2.29e-10
chrX	145813829	145818829	ENSG00000185985.11	SLITRK2	+	145817829	protein_coding	55.2502	-4.20628	0.476791	-8.82206	1.12e-18	6.88e-14
chr9	29212601	29217601	ENSG00000174482.11	LINGO2	-	29213601	protein_coding	47.6508	-4.05558	0.491218	-8.25617	1.5e-16	4.61e-12
chrX	145819632	145824632	ENSG00000286085.1	ENSG00000286085	-	145820632	lncRNA	22.6685	-3.80197	0.665035	-5.71695	1.08e-08	2.38e-05
chr15	98646389	98651389	ENSG00000259424.3	IRAIN	-	98647389	lncRNA	21.5411	-3.60442	0.677473	-5.32039	1.04e-07	0.0001451
chrX	123180153	123185153	ENSG00000125675.20	GRIA3	+	123184153	protein_coding	38.1475	-3.51757	0.595606	-5.90586	3.51e-09	1.23e-05
chrX	120962948	120967948	ENSG00000270736.1	ENSG00000270736	+	120966948	processed_pseudogene	3.93395	-3.50348	1.55033	-2.25983	0.0238321	0.196246
chrX	25590808	25595808	ENSG00000229310.1	RPP40P1	-	25591808	processed_pseudogene	22.2475	-3.48535	0.712576	-4.8912	1e-06	0.00092982
chr10	42205990	42210990	ENSG00000271650.1	ENSG00000271650	+	42209990	processed_pseudogene	2.07514	-3.45473	2.42042	-1.42733	0.153486	0.401212
chrX	83504290	83509290	ENSG00000196767.9	POU3F4	+	83508290	protein_coding	42.3142	-3.45032	0.491876	-7.01461	2.31e-12	3.5e-08
chr15	98644539	98649539	ENSG00000140443.15	IGF1R	+	98648539	protein_coding	25.3463	-3.42881	0.584796	-5.86326	4.54e-09	1.46e-05
chrX	93672578	93677578	ENSG00000186310.10	NAP1L3	-	93673578	protein_coding	18.4428	-3.35265	0.709736	-4.7238	2.31e-06	0.00186502
chrX	116432606	116437606	ENSG00000268104.3	SLC6A14	+	116436606	protein_coding	25.1428	-3.30276	0.654856	-5.04349	4.57e-07	0.0004665
chrX	114580078	114585078	ENSG00000147246.10	HTR2C	+	114584078	protein_coding	13.4037	-3.24066	0.798899	-4.05641	4.98e-05	0.0186059
chrX	139221777	139226777	ENSG00000129682.16	FGF13	-	139222777	protein_coding	23.4447	-3.23293	0.616391	-5.24493	1.56e-07	0.00020368
chr2	192193933	192198933	ENSG00000144339.12	TMEFF2	-	192194933	protein_coding	34.4245	-3.18022	0.544756	-5.83787	5.29e-09	1.54e-05
chrX	91775261	91780261	ENSG00000102290.23	PCDH11X	+	91779261	protein_coding	13.5183	-3.17897	0.824389	-3.85615	0.00011519	0.0313478
chrX	114605896	114610896	ENSG00000289287.1	ENSG00000289287	-	114606896	lncRNA	5.88677	-3.13172	1.44989	-2.15997	0.0307752	0.216523
chr4	155208027	155213027	ENSG00000250538.6	NPY2R-AS1	-	155209027	lncRNA	29.7656	-3.10262	0.563745	-5.50359	3.72e-08	6.16e-05
chrX	119149579	119154579	ENSG00000250423.3	KIAA1210	-	119150579	protein_coding	45.3748	-3.03283	0.50372	-6.02087	1.73e-09	6.64e-06
chrX	154581133	154586133	ENSG00000268651.4	CTAG1A	+	154585133	protein_coding	11.3801	-3.02641	0.836171	-3.61936	0.00029533	0.0508242
chr4	30716369	30721369	ENSG00000169851.16	PCDH7	+	30720369	protein_coding	40.0598	-3.00825	0.518303	-5.80403	6.47e-09	1.72e-05
chrX	138478745	138483745	ENSG00000183981.8	MAGEA13P	+	138482745	processed_pseudogene	19.2394	-2.99819	0.686217	-4.36917	1.25e-05	0.00652734
chrX	143635101	143640101	ENSG00000179542.16	SLITRK4	-	143636101	protein_coding	11.221	-2.99051	0.798312	-3.74604	0.00017965	0.0404414
chr2	38069447	38074447	ENSG00000232973.14	CYP1B1-AS1	+	38073447	lncRNA	55.8748	-2.98267	0.472457	-6.31311	2.73e-10	1.86e-06
chr2	184594529	184599529	ENSG00000170396.9	ZNF804A	+	184598529	protein_coding	40.4982	-2.95662	0.517189	-5.7167	1.09e-08	2.38e-05
chr8	84178787	84183787	ENSG00000184672.12	RALYL	+	84182787	protein_coding	25.454	-2.93115	0.636839	-4.60266	4.17e-06	0.00296997
chr13	24743658	24748658	ENSG00000287887.1	ENSG00000287887	+	24747658	lncRNA	28.6232	-2.92577	0.559472	-5.22951	1.7e-07	0.00021681
chr4	121067429	121072429	ENSG00000250344.1	NDNF-AS1	+	121071429	lncRNA	42.5689	-2.89405	0.511751	-5.65519	1.56e-08	3.29e-05
chr5	100729058	100734058	ENSG00000207269.1	RN7SKP62	+	100733058	misc_RNA	27.8704	-2.89024	0.582674	-4.96031	7.04e-07	0.00067338
chr2	165790851	165795851	ENSG00000235192.1	ENSG00000235192	+	165794851	lncRNA	47.6978	-2.88882	0.4192	-6.89127	5.53e-12	5.64e-08
chr7	85186056	85191056	ENSG00000153993.14	SEMA3D	-	85187056	protein_coding	54.9497	-2.87538	0.468359	-6.13926	8.29e-10	3.63e-06
chrX	112081776	112086776	ENSG00000072315.4	TRPC5	-	112082776	protein_coding	31.5667	-2.86888	0.524591	-5.4688	4.53e-08	7.3e-05
chr14	105625066	105630066	ENSG00000211892.4	IGHG4	-	105626066	IG_C_gene	10.9411	-2.85583	0.802005	-3.56086	0.00036964	0.0545393
chr4	173990024	173995024	ENSG00000251216.2	ENSG00000251216	-	173991024	lncRNA	40.2339	-2.82891	0.455206	-6.21458	5.15e-10	2.86e-06
chr13	91481793	91486793	ENSG00000282864.1	ENSG00000282864	+	91485793	TEC	37.7696	-2.82619	0.478966	-5.9006	3.62e-09	1.23e-05
chr2	165793659	165798659	ENSG00000115339.14	GALNT3	-	165794659	protein_coding	41.7648	-2.76679	0.441157	-6.27167	3.57e-10	2.19e-06
chr8	82676153	82681153	ENSG00000253503.6	ENSG00000253503	-	82677153	lncRNA	29.4362	-2.76626	0.534309	-5.17726	2.25e-07	0.00025312
chr6	117263817	117268817	ENSG00000287253.1	ENSG00000287253	-	117264817	lncRNA	69.6449	-2.76087	0.395284	-6.98453	2.86e-12	3.5e-08
chr2	165190993	165195993	ENSG00000136531.19	SCN2A	+	165194993	protein_coding	45.2659	-2.75036	0.470792	-5.84198	5.16e-09	1.54e-05
chr4	155204636	155209636	ENSG00000185149.6	NPY2R	+	155208636	protein_coding	29.11	-2.7487	0.578335	-4.75278	2.01e-06	0.00166024
chrX	35794342	35799342	ENSG00000189023.11	MAGEB16	+	35798342	protein_coding	5.28734	-2.73421	1.50617	-1.81534	0.0694721	0.293344
chrX	137440836	137445836	ENSG00000237584.1	RAC1P4	-	137441836	processed_pseudogene	15.6781	-2.72801	0.663428	-4.112	3.92e-05	0.0155963
chrX	116107430	116112430	ENSG00000234558.1	API5P1	-	116108430	processed_pseudogene	20.3712	-2.70012	0.63853	-4.22864	2.35e-05	0.0109893
chrX	11664920	11669920	ENSG00000047648.23	ARHGAP6	-	11665920	protein_coding	59.0067	-2.68902	0.446556	-6.02167	1.73e-09	6.64e-06
chrX	120933762	120938762	ENSG00000270493.1	ENSG00000270493	+	120937762	processed_pseudogene	3.43004	-2.6875	1.54975	-1.73416	0.0828904	0.313964
chr4	174522154	174527154	ENSG00000164120.14	HPGD	-	174523154	protein_coding	51.5357	-2.66659	0.41728	-6.3904	1.65e-10	1.27e-06
chrX	48333439	48338439	ENSG00000230100.1	ENSG00000230100	-	48334439	lncRNA	14.9552	-2.65311	0.69075	-3.84091	0.00012258	0.032363
chrX	32098065	32103065	ENSG00000222922.1	RNA5SP501	+	32102065	rRNA_pseudogene	12.8281	-2.64201	0.9103	-2.90235	0.00370372	0.0895679
chr5	101972296	101977296	ENSG00000249495.1	ENSG00000249495	+	101976296	processed_pseudogene	23.2087	-2.64017	0.578582	-4.56317	5.04e-06	0.0033042
chr2	213147972	213152972	ENSG00000270659.2	ENSG00000270659	+	213151972	lncRNA	47.4967	-2.6193	0.555506	-4.71517	2.42e-06	0.00192053
chrX	145793375	145798375	ENSG00000279585.1	ENSG00000279585	+	145797375	TEC	23.4255	-2.61009	0.565184	-4.61813	3.87e-06	0.00282265
chrX	154601858	154606858	ENSG00000232155.1	ENSG00000232155	+	154605858	processed_pseudogene	43.8243	-2.60757	0.486364	-5.36135	8.26e-08	0.00012337
chrX	30239715	30244715	ENSG00000214107.9	MAGEB1	+	30243715	protein_coding	15.9625	-2.60485	0.732258	-3.55728	0.00037471	0.0545786
chr13	109781831	109786831	ENSG00000275741.1	ENSG00000275741	+	109785831	lncRNA	2.64455	-2.60467	1.885	-1.38179	0.167036	0.416932
chrX	70230655	70235655	ENSG00000204195.4	AWAT1	+	70234655	protein_coding	30.7699	-2.60042	0.590387	-4.40461	1.06e-05	0.00574246
chrX	23836321	23841321	ENSG00000238103.4	RPL9P7	-	23837321	processed_pseudogene	3.74129	-2.59728	1.72418	-1.50639	0.131968	0.378216
chrX	119692370	119697370	ENSG00000125354.24	SEPTIN6	-	119693370	protein_coding	6.23818	-2.59125	1.16958	-2.21554	0.0267228	0.205203
chrX	37902147	37907147	ENSG00000259977.1	ENSG00000259977	+	37906147	lncRNA	32.1965	-2.58807	0.507013	-5.10454	3.32e-07	0.00035622
chrX	138487871	138492871	ENSG00000214930.2	KRT8P6	-	138488871	processed_pseudogene	14.9247	-2.57676	0.776744	-3.31738	0.00090865	0.0654051
chrX	116166744	116171744	ENSG00000180772.8	AGTR2	+	116170744	protein_coding	26.6099	-2.56801	0.561073	-4.57696	4.72e-06	0.00324579
chr12	20369262	20374262	ENSG00000256879.1	PDE3A-AS1	-	20370262	lncRNA	42.9736	-2.56357	0.463332	-5.5329	3.15e-08	5.36e-05
chr4	120921870	120926870	ENSG00000138738.11	PRDM5	-	120922870	protein_coding	30.2207	-2.56251	0.50442	-5.08011	3.77e-07	0.00039823
chr4	121060478	121065478	ENSG00000223006.1	RN7SKP137	-	121061478	misc_RNA	42.3586	-2.55158	0.45677	-5.58614	2.32e-08	4.18e-05
chrX	12374133	12379133	ENSG00000223487.1	FRMPD4-AS1	-	12375133	lncRNA	18.8331	-2.54452	0.64103	-3.96942	7.2e-05	0.0235917
chrX	107776342	107781342	ENSG00000157514.18	TSC22D3	-	107777342	protein_coding	8.14243	-2.54416	1.00599	-2.52901	0.0114386	0.144462
chrX	136635535	136640535	ENSG00000233093.8	LINC00892	+	136639535	lncRNA	19.3689	-2.54237	0.733991	-3.46376	0.00053269	0.0579941
chr2	213151427	213156427	ENSG00000030419.17	IKZF2	-	213152427	protein_coding	39.7625	-2.53064	0.580944	-4.35609	1.32e-05	0.00687089
chr3	69541583	69546583	ENSG00000114541.15	FRMD4B	-	69542583	protein_coding	17.892	-2.52458	0.645231	-3.91267	9.13e-05	0.0272653
chr4	174153637	174158637	ENSG00000250957.1	ENSG00000250957	-	174154637	lncRNA	40.8447	-2.52348	0.475758	-5.30411	1.13e-07	0.00015406
chr7	144190858	144195858	ENSG00000244198.7	ARHGEF35-AS1	+	144194858	lncRNA	6.44247	-2.52171	1.135	-2.22177	0.0262991	0.20412
chrX	100873359	100878359	ENSG00000007952.18	NOX1	-	100874359	protein_coding	34.0591	-2.50947	0.483459	-5.19067	2.1e-07	0.00025312
chr13	52124891	52129891	ENSG00000273523.1	ENSG00000273523	+	52128891	lncRNA	29.1203	-2.49487	0.560268	-4.45299	8.47e-06	0.00492993
chr4	61196326	61201326	ENSG00000150471.17	ADGRL3	+	61200326	protein_coding	64.8136	-2.47914	0.428907	-5.78013	7.46e-09	1.9e-05
chrX	137032995	137037995	ENSG00000165370.3	GPR101	-	137033995	protein_coding	103.326	-2.45407	0.361433	-6.78983	1.12e-11	9.82e-08
chrX	38219924	38224924	ENSG00000101955.15	SRPX	-	38220924	protein_coding	39.306	-2.42825	0.435438	-5.57657	2.45e-08	4.29e-05
chrX	12613197	12618197	ENSG00000271814.1	RN7SKP290	-	12614197	misc_RNA	14.5561	-2.41904	0.759617	-3.18455	0.00144979	0.0697008
chr2	184598008	184603008	ENSG00000283839.3	ENSG00000283839	-	184599008	lncRNA	30.4431	-2.4076	0.643217	-3.74307	0.00018179	0.0404882
chrX	30974084	30979084	ENSG00000157625.16	TAB3	-	30975084	protein_coding	32.5256	-2.40458	0.490989	-4.89742	9.71e-07	0.00091474
chr6	55939624	55944624	ENSG00000214604.3	NPM1P36	-	55940624	processed_pseudogene	29.9065	-2.40403	0.542487	-4.43149	9.36e-06	0.00525721
chr14	33599989	33604989	ENSG00000287153.1	ENSG00000287153	-	33600989	lncRNA	51.952	-2.39084	0.416189	-5.74459	9.21e-09	2.17e-05
chrX	153407472	153412472	ENSG00000189420.9	ZFP92	+	153411472	protein_coding	19.1926	-2.38877	0.64178	-3.72211	0.00019756	0.0417127
chrX	116461976	116466976	ENSG00000204019.5	CT83	-	116462976	protein_coding	25.6803	-2.38602	0.563321	-4.23563	2.28e-05	0.010735
chr2	132006195	132011195	ENSG00000287414.1	ENSG00000287414	+	132010195	lncRNA	38.7989	-2.37525	0.5664	-4.19359	2.75e-05	0.0125469
chr3	35740476	35745476	ENSG00000207625.1	MIR128-2	+	35744476	miRNA	23.4334	-2.37221	0.617312	-3.84281	0.00012164	0.032363
chrX	26553675	26558675	ENSG00000259849.2	VENTXP1	+	26557675	transcribed_processed_pseudogene	13.4636	-2.36867	0.897345	-2.63965	0.00829929	0.124768
chrX	120936158	120941158	ENSG00000226929.3	CT47A11	-	120937158	protein_coding	3.55343	-2.36833	1.51233	-1.56602	0.117345	0.360905
chrX	48305179	48310179	ENSG00000204648.11	SSX9P	-	48306179	transcribed_unprocessed_pseudogene	19.1199	-2.36622	0.62398	-3.79214	0.00014935	0.0357234
chrX	138802374	138807374	ENSG00000235975.1	TPM2P1	+	138806374	processed_pseudogene	15.0394	-2.36544	0.667947	-3.54136	0.00039807	0.0548994
chr8	68326955	68331955	ENSG00000165084.16	C8orf34	+	68330955	protein_coding	52.9344	-2.34962	0.417781	-5.62404	1.87e-08	3.68e-05
chrX	147177064	147182064	ENSG00000284377.2	ENSG00000284377	+	147181064	lncRNA	10.6281	-2.34571	0.955079	-2.45604	0.0140478	0.158131
chrX	38217391	38222391	ENSG00000226679.1	ENSG00000226679	+	38221391	lncRNA	34.367	-2.34241	0.469967	-4.98419	6.22e-07	0.00061451
chrX	112079016	112084016	ENSG00000187823.4	RTL4	+	112083016	protein_coding	45.8915	-2.33356	0.437573	-5.33297	9.66e-08	0.00014086
chr11	20159475	20164475	ENSG00000109851.7	DBX1	-	20160475	protein_coding	81.6109	-2.33008	0.376604	-6.18709	6.13e-10	3.13e-06
chr9	68356893	68361893	ENSG00000224958.6	PGM5-AS1	-	68357893	lncRNA	42.091	-2.32854	0.480371	-4.84737	1.25e-06	0.00109438
chrX	103275750	103280750	ENSG00000204065.3	TCEAL5	-	103276750	protein_coding	53.8724	-2.32809	0.427784	-5.4422	5.26e-08	8.06e-05
chrX	37986779	37991779	ENSG00000187516.7	H2AP	+	37990779	protein_coding	23.7871	-2.32704	0.63573	-3.66042	0.0002518	0.0472955
chrX	120977529	120982529	ENSG00000270456.1	ENSG00000270456	+	120981529	processed_pseudogene	5.25203	-2.3232	1.09198	-2.12752	0.033377	0.223433
chr7	86639909	86644909	ENSG00000198822.11	GRM3	+	86643909	protein_coding	34.6455	-2.32181	0.569473	-4.07711	4.56e-05	0.0174503
chr14	32930396	32935396	ENSG00000151322.20	NPAS3	+	32934396	protein_coding	29.3446	-2.32128	0.555032	-4.18224	2.89e-05	0.0129959
chrX	152894067	152899067	ENSG00000147394.20	ZNF185	+	152898067	protein_coding	14.922	-2.31925	0.675866	-3.43153	0.00060019	0.0613532
chrX	93776384	93781384	ENSG00000270826.1	USP37P1	-	93777384	processed_pseudogene	11.5304	-2.30924	0.96302	-2.39791	0.0164889	0.169461
chrX	101779538	101784538	ENSG00000178146.9	GK4P	-	101780538	processed_pseudogene	22.4816	-2.30787	0.674332	-3.42246	0.00062058	0.0618127
chr16	86566847	86571847	ENSG00000260944.3	FOXC2-AS1	-	86567847	lncRNA	20.9178	-2.30609	0.558491	-4.12915	3.64e-05	0.014751
chrX	12053926	12058926	ENSG00000206792.1	Y_RNA	-	12054926	misc_RNA	19.2107	-2.2983	0.689756	-3.33205	0.00086208	0.0652971
chr5	95284094	95289094	ENSG00000175471.20	MCTP1	-	95285094	protein_coding	46.268	-2.29469	0.443065	-5.17912	2.23e-07	0.00025312
chr2	238844032	238849032	ENSG00000233608.4	TWIST2	+	238848032	protein_coding	71.8943	-2.29455	0.39775	-5.76882	7.98e-09	1.96e-05
chrX	94315038	94320038	ENSG00000227521.2	TUBB4BP8	+	94319038	processed_pseudogene	7.61384	-2.28937	0.944215	-2.42463	0.015324	0.164415
chr4	174167913	174172913	ENSG00000251213.1	ENSG00000251213	-	174168913	lncRNA	38.4789	-2.28674	0.460182	-4.9692	6.72e-07	0.00065343
chrX	37990272	37995272	ENSG00000229674.3	H2AL3	+	37994272	protein_coding	19.2522	-2.28171	0.657821	-3.46858	0.00052321	0.0579941
chrX	149649124	149654124	ENSG00000229322.1	ENSG00000229322	-	149650124	processed_pseudogene	40.0388	-2.2801	0.456552	-4.99417	5.91e-07	0.00059314
chrX	124204806	124209806	ENSG00000234564.1	HSPA8P20	-	124205806	processed_pseudogene	30.9809	-2.27421	0.533457	-4.26315	2.02e-05	0.00964219
chrX	154647275	154652275	ENSG00000275882.1	IKBKGP1	-	154648275	unprocessed_pseudogene	22.1336	-2.27099	0.57797	-3.92925	8.52e-05	0.0260888
chrX	42053836	42058836	ENSG00000233103.1	ENSG00000233103	-	42054836	lncRNA	9.78542	-2.26704	0.884436	-2.56327	0.0103692	0.13776
chrX	134961305	134966305	ENSG00000231929.2	HMGB3P31	-	134962305	processed_pseudogene	23.7717	-2.2626	0.639194	-3.53977	0.00040047	0.0548994
chr4	30713369	30718369	ENSG00000288940.1	ENSG00000288940	+	30717369	lncRNA	25.6133	-2.26215	0.529946	-4.26864	1.97e-05	0.00948232
chrX	149684228	149689228	ENSG00000185247.15	MAGEA11	+	149688228	protein_coding	21.7565	-2.25698	0.589972	-3.82557	0.00013047	0.0332843
chr14	32929338	32934338	ENSG00000289111.2	ENSG00000289111	+	32933338	lncRNA	39.0579	-2.25447	0.486619	-4.63293	3.61e-06	0.00265974
chrX	141697739	141702739	ENSG00000196406.4	SPANXD	-	141698739	protein_coding	4.91753	-2.25231	1.29382	-1.74081	0.0817165	0.312388
chr4	165869237	165874237	ENSG00000038295.8	TLL1	+	165873237	protein_coding	35.2388	-2.25036	0.481959	-4.66919	3.02e-06	0.00234375
chr2	215544526	215549526	ENSG00000234938.2	ENSG00000234938	-	215545526	lncRNA	51.0606	-2.24717	0.398245	-5.64269	1.67e-08	3.42e-05
chrX	70249042	70254042	ENSG00000200473.1	RNA5SP507	+	70253042	rRNA_pseudogene	12.1441	-2.24427	0.73465	-3.05488	0.00225148	0.0768777
chr14	47674605	47679605	ENSG00000139915.21	MDGA2	-	47675605	protein_coding	27.1665	-2.23661	0.572099	-3.90947	9.25e-05	0.0274941
chrX	51706512	51711512	ENSG00000223591.5	CENPVL1	+	51710512	protein_coding	42.2825	-2.23489	0.514893	-4.3405	1.42e-05	0.00719395
chrX	131200068	131205068	ENSG00000237650.2	OR11Q1P	+	131204068	unprocessed_pseudogene	30.514	-2.23051	0.520896	-4.28206	1.85e-05	0.00899867
chr9	27825276	27830276	ENSG00000260390.1	ENSG00000260390	+	27829276	lncRNA	17.7974	-2.22642	0.627961	-3.54548	0.0003919	0.0548994
chrX	146805771	146810771	ENSG00000235699.3	CXorf51B	+	146809771	protein_coding	7.98803	-2.22254	0.972837	-2.28459	0.0223367	0.191743
chr6	121431595	121436595	ENSG00000152661.9	GJA1	+	121435595	protein_coding	20.2594	-2.21726	0.767914	-2.88738	0.00388461	0.0904969
chr1	20728880	20733880	ENSG00000233069.1	ENSG00000233069	+	20732880	lncRNA	4.34166	-2.21714	1.20266	-1.84353	0.0652512	0.286249
chr7	107998982	108003982	ENSG00000238297.2	U3	-	107999982	snoRNA	59.3983	-2.2165	0.406754	-5.44923	5.06e-08	7.94e-05
chr9	106718350	106723350	ENSG00000228143.2	ENSG00000228143	+	106722350	processed_pseudogene	11.5649	-2.21623	0.961681	-2.30454	0.0211924	0.18782
chr6	55874590	55879590	ENSG00000112175.8	BMP5	-	55875590	protein_coding	42.0973	-2.2158	0.464927	-4.76591	1.88e-06	0.00157697
chr1	241353343	241358343	ENSG00000286496.1	ENSG00000286496	+	241357343	lncRNA	29.0831	-2.2134	0.553336	-4.0001	6.33e-05	0.0220282
chr12	20364537	20369537	ENSG00000172572.7	PDE3A	+	20368537	protein_coding	25.8654	-2.20912	0.531922	-4.15309	3.28e-05	0.0141556
chr13	91394621	91399621	ENSG00000179399.15	GPC5	+	91398621	protein_coding	40.1055	-2.19844	0.458072	-4.79932	1.59e-06	0.00135395
chr2	182522359	182527359	ENSG00000115252.19	PDE1A	-	182523359	protein_coding	34.5898	-2.19694	0.477167	-4.60414	4.14e-06	0.00296997
chr11	22361294	22366294	ENSG00000254540.1	ENSG00000254540	-	22362294	lncRNA	46.5016	-2.19368	0.423276	-5.18262	2.19e-07	0.00025312
chrX	96409782	96414782	ENSG00000223260.1	RN7SKP194	-	96410782	misc_RNA	13.249	-2.19262	0.802473	-2.73233	0.00628885	0.110369
chrX	115836899	115841899	ENSG00000229335.2	DANT1	+	115840899	lncRNA	4.06153	-2.18657	1.37921	-1.58539	0.112879	0.355489
chr3	151460061	151465061	ENSG00000152580.9	IGSF10	-	151461061	protein_coding	74.977	-2.17843	0.354826	-6.13943	8.28e-10	3.63e-06
chr18	27184308	27189308	ENSG00000154080.14	CHST9	-	27185308	protein_coding	55.2492	-2.17835	0.44608	-4.88333	1.04e-06	0.00094955
chr4	173504072	173509072	ENSG00000286039.3	ENSG00000286039	+	173508072	lncRNA	28.4981	-2.17395	0.594792	-3.65498	0.0002572	0.0481626
chrX	154215756	154220756	ENSG00000166160.9	OPN1MW2	+	154219756	protein_coding	11.9151	-2.1719	0.730724	-2.97226	0.00295615	0.0825381
chr13	92480606	92485606	ENSG00000236240.1	GPC5-IT1	+	92484606	lncRNA	18.7404	-2.17069	0.756703	-2.86862	0.00412272	0.0929387
chrX	13730743	13735743	ENSG00000046651.16	OFD1	+	13734743	protein_coding	3.98477	-2.16846	1.28671	-1.68527	0.0919365	0.327123
chrX	120960487	120965487	ENSG00000226023.6	CT47A6	-	120961487	protein_coding	4.29837	-2.16827	1.29228	-1.67786	0.0933736	0.328804
chr5	102137893	102142893	ENSG00000248261.2	ENSG00000248261	+	102141893	lncRNA	27.0487	-2.16632	0.533973	-4.05699	4.97e-05	0.0186059
chrX	49194966	49199966	ENSG00000237341.1	SYP-AS1	+	49198966	lncRNA	13.8686	-2.1635	0.71155	-3.04055	0.0023615	0.0781009
chrX	113878590	113883590	ENSG00000270524.1	QTRT1P1	+	113882590	processed_pseudogene	17.3393	-2.15609	0.752402	-2.86561	0.00416208	0.0930503
chr4	174518617	174523617	ENSG00000251584.2	ENSG00000251584	+	174522617	lncRNA	31.2837	-2.15197	0.562918	-3.82289	0.00013189	0.0332843
chrX	120975068	120980068	ENSG00000236126.3	CT47A3	-	120976068	protein_coding	4.52928	-2.15123	1.24464	-1.7284	0.0839172	0.315589
chr5	112415583	112420583	ENSG00000278921.2	EPB41L4A-DT	+	112419583	lncRNA	21.6171	-2.1462	0.604013	-3.55323	0.00038053	0.0547932
chr17	48642923	48647923	ENSG00000244649.5	LINC02086	+	48646923	lncRNA	42.6138	-2.14359	0.564716	-3.79586	0.00014713	0.035469
chrX	107900246	107905246	ENSG00000207363.1	Y_RNA	-	107901246	misc_RNA	29.0706	-2.14325	0.569011	-3.76662	0.00016547	0.0382348
chrX	120931301	120936301	ENSG00000226685.4	CT47A12	-	120932301	protein_coding	3.38885	-2.14168	1.37748	-1.55478	0.119998	0.364216
chrX	154576926	154581926	ENSG00000273041.1	ATF4P2	+	154580926	processed_pseudogene	23.4457	-2.13958	0.572137	-3.73963	0.00018429	0.0407622
chr7	108129361	108134361	ENSG00000091128.13	LAMB4	-	108130361	protein_coding	45.5075	-2.1389	0.405805	-5.27075	1.36e-07	0.00018086
chrX	118934153	118939153	ENSG00000231270.1	COBLP1	+	118938153	processed_pseudogene	22.8346	-2.13367	0.645202	-3.30698	0.00094309	0.0658046
chr4	147476917	147481917	ENSG00000151617.17	EDNRA	+	147480917	protein_coding	40.8333	-2.13348	0.437831	-4.87284	1.1e-06	0.00097621
chrX	50198713	50203713	ENSG00000147082.18	CCNB3	+	50202713	protein_coding	25.1783	-2.13267	0.603196	-3.53562	0.00040682	0.0548994
chr5	17302381	17307381	ENSG00000185296.8	ENSG00000185296	+	17306381	processed_pseudogene	19.2699	-2.13208	0.743419	-2.86794	0.00413148	0.0929387
chr2	212537841	212542841	ENSG00000178568.15	ERBB4	-	212538841	protein_coding	24.7357	-2.13143	0.560262	-3.80434	0.00014218	0.0348495
chr4	11428564	11433564	ENSG00000002587.10	HS3ST1	-	11429564	protein_coding	33.1739	-2.12894	0.527257	-4.03776	5.4e-05	0.0196686
chrX	51681831	51686831	ENSG00000283093.1	CENPVL2	-	51682831	protein_coding	41.86	-2.12731	0.484673	-4.38916	1.14e-05	0.00605868
chrX	54357642	54362642	ENSG00000196632.11	WNK3	-	54358642	protein_coding	45.8413	-2.1271	0.410336	-5.1838	2.17e-07	0.00025312
chrX	52661231	52666231	ENSG00000222608.1	RNA5SP504	+	52665231	rRNA_pseudogene	25.555	-2.12521	0.575268	-3.69429	0.0002205	0.043837
chr12	20547590	20552590	ENSG00000256663.1	ENSG00000256663	+	20551590	processed_pseudogene	22.6985	-2.12391	0.613494	-3.46198	0.00053621	0.0579941
chr13	106749247	106754247	ENSG00000287546.1	ENSG00000287546	+	106753247	lncRNA	45.034	-2.12329	0.514383	-4.12785	3.66e-05	0.014751
chrX	12395167	12400167	ENSG00000231211.2	RPL17P49	-	12396167	processed_pseudogene	14.4957	-2.12319	0.803806	-2.64142	0.00825581	0.124604
chr8	68094081	68099081	ENSG00000255206.1	ENSG00000255206	-	68095081	lncRNA	12.5947	-2.12193	0.78459	-2.70451	0.00684052	0.114536
chr17	34578369	34583369	ENSG00000197322.4	TMEM132E-DT	-	34579369	lncRNA	79.2253	-2.11809	0.454748	-4.65772	3.2e-06	0.00238755
chrX	131933670	131938670	ENSG00000235190.1	ENSG00000235190	+	131937670	processed_pseudogene	16.9047	-2.11806	0.645468	-3.28143	0.00103282	0.066448
chrX	153494516	153499516	ENSG00000213397.12	HAUS7	-	153495516	protein_coding	20.628	-2.11768	0.646455	-3.27584	0.00105349	0.0668468
chrX	129842909	129847909	ENSG00000188706.13	ZDHHC9	-	129843909	protein_coding	25.6661	-2.11732	0.545343	-3.88254	0.00010337	0.0292625
chrX	12844430	12849430	ENSG00000230691.1	MRPL35P4	-	12845430	processed_pseudogene	22.0884	-2.1108	0.572984	-3.68387	0.00022972	0.0447967
chrX	77370212	77375212	ENSG00000234404.2	SPRYD7P1	+	77374212	processed_pseudogene	28.9334	-2.11037	0.524139	-4.02636	5.66e-05	0.0204032
chrX	111269483	111274483	ENSG00000077274.9	CAPN6	-	111270483	protein_coding	22.7306	-2.10519	0.598806	-3.51564	0.00043869	0.0554998
chr3	165196109	165201109	ENSG00000121871.4	SLITRK3	-	165197109	protein_coding	28.9178	-2.10083	0.548453	-3.83047	0.0001279	0.0330441
chrX	138554996	138559996	ENSG00000285989.1	H2AQ1P	+	138558996	unitary_pseudogene	18.8784	-2.09693	0.687527	-3.04996	0.00228873	0.0772794
chr6	123819240	123824240	ENSG00000237321.1	ENSG00000237321	+	123823240	lncRNA	90.0261	-2.09164	0.772497	-2.70764	0.0067763	0.113988
chrX	80010753	80015753	ENSG00000122145.15	TBX22	+	80014753	protein_coding	19.703	-2.09093	0.584093	-3.5798	0.00034386	0.0529101
chr12	111030165	111035165	ENSG00000111249.14	CUX2	+	111034165	protein_coding	21.8136	-2.08912	0.588027	-3.55277	0.0003812	0.0547932
chrX	154178596	154183596	ENSG00000268221.6	OPN1MW	+	154182596	protein_coding	11.5289	-2.08903	0.838673	-2.49087	0.0127431	0.15171
chr8	68330689	68335689	ENSG00000248801.7	C8orf34-AS1	-	68331689	lncRNA	62.6483	-2.0886	0.358891	-5.81959	5.9e-09	1.64e-05
chrX	75197491	75202491	ENSG00000229661.1	BUD31P2	+	75201491	processed_pseudogene	19.6151	-2.08689	0.63004	-3.31231	0.00092528	0.0654051
chr6	99989934	99994934	ENSG00000229315.7	MCHR2-AS1	+	99993934	lncRNA	25.8161	-2.0863	0.594357	-3.51018	0.00044781	0.0556187
chrX	70128071	70133071	ENSG00000235382.1	MTND4P31	-	70129071	processed_pseudogene	16.5404	-2.08541	0.689851	-3.02299	0.0025029	0.0786744
chrX	140215804	140220804	ENSG00000231110.1	ENSG00000231110	-	140216804	lncRNA	22.353	-2.08446	0.631321	-3.30174	0.00096088	0.0659602
chr1	244186559	244191559	ENSG00000287531.1	ENSG00000287531	-	244187559	lncRNA	21.2893	-2.07559	0.805055	-2.57819	0.00993184	0.134604
chr17	17778529	17783529	ENSG00000226746.2	SMCR5	-	17779529	lncRNA	3.18175	-2.07501	1.75587	-1.18176	0.237303	0.489689
chr6	117261558	117266558	ENSG00000170162.14	VGLL2	+	117265558	protein_coding	56.7135	-2.07439	0.389987	-5.31913	1.04e-07	0.0001451
chr4	11413160	11418160	ENSG00000222182.1	RNA5SP156	-	11414160	rRNA_pseudogene	22.6439	-2.07319	0.669206	-3.09798	0.00194843	0.0736599
chr10	52754509	52759509	ENSG00000231131.10	LNCAROD	-	52755509	lncRNA	37.908	-2.07248	0.46684	-4.43938	9.02e-06	0.00511497
chrX	52195840	52200840	ENSG00000179028.4	ENSG00000179028	+	52199840	lncRNA	38.5361	-2.05954	0.451122	-4.56537	4.99e-06	0.0033042
chrX	54803599	54808599	ENSG00000102316.17	MAGED2	+	54807599	protein_coding	32.4589	-2.05826	0.615587	-3.34357	0.00082708	0.0652971
chr2	142539418	142544418	ENSG00000228134.1	UBE2V1P14	+	142543418	processed_pseudogene	48.2375	-2.05774	0.405922	-5.06931	3.99e-07	0.00041437
chr4	185014490	185019490	ENSG00000187821.9	HELT	+	185018490	protein_coding	16.3164	-2.05521	0.786587	-2.61281	0.00897999	0.128913
chr9	135339249	135344249	ENSG00000178243.4	LINC02907	+	135343249	lncRNA	21.788	-2.05294	0.607117	-3.38146	0.00072102	0.0652293
chr7	50300068	50305068	ENSG00000185811.21	IKZF1	+	50304068	protein_coding	47.4783	-2.05159	0.420306	-4.88119	1.05e-06	0.00094955
chrX	107445652	107450652	ENSG00000147234.11	FRMPD3	+	107449652	protein_coding	28.8355	-2.05054	0.561967	-3.64886	0.00026341	0.0484347
chr6	35727583	35732583	ENSG00000096060.15	FKBP5	-	35728583	protein_coding	5.48192	-2.04749	1.26058	-1.62424	0.104324	0.343754
chrX	147285481	147290481	ENSG00000287017.1	ENSG00000287017	-	147286481	lncRNA	9.14998	-2.04317	0.941737	-2.16957	0.0300392	0.214497
chrX	107821755	107826755	ENSG00000080561.14	MID2	+	107825755	protein_coding	34.5697	-2.04015	0.510568	-3.99585	6.45e-05	0.0223003
chr17	46578691	46583691	ENSG00000185829.18	ARL17A	-	46579691	protein_coding	3.13076	-2.03902	1.67562	-1.21688	0.223651	0.476683
chrX	152749921	152754921	ENSG00000268916.6	CSAG3	+	152753921	protein_coding	17.262	-2.03667	0.69178	-2.9441	0.00323899	0.0851828
chr13	92179885	92184885	ENSG00000229287.1	FABP5P4	-	92180885	processed_pseudogene	19.7874	-2.03521	0.588612	-3.45764	0.00054493	0.0580902
chrX	48202258	48207258	ENSG00000252856.1	RNA5SP503	+	48206258	rRNA_pseudogene	46.0597	-2.03233	0.46866	-4.33647	1.45e-05	0.00726711
chrX	48318349	48323349	ENSG00000227302.1	SSXP9	+	48322349	unprocessed_pseudogene	26.2592	-2.03227	0.491925	-4.13125	3.61e-05	0.0147281
chr1	79492814	79497814	ENSG00000288822.2	ENSG00000288822	-	79493814	lncRNA	79.0167	-2.03034	0.362312	-5.60384	2.1e-08	3.89e-05
chr4	57837721	57842721	ENSG00000285998.1	ENSG00000285998	+	57841721	lncRNA	30.1457	-2.02989	0.571549	-3.55155	0.00038297	0.0548268
chrX	153475266	153480266	ENSG00000224963.3	ECMXP	+	153479266	transcribed_unitary_pseudogene	12.8641	-2.02874	0.69856	-2.90417	0.00368229	0.0894022
chrX	36715829	36720829	ENSG00000249467.2	H2AL1Q	+	36719829	protein_coding	23.8195	-2.02376	0.54887	-3.68713	0.00022679	0.0446528
chrX	129653956	129658956	ENSG00000171388.12	APLN	-	129654956	protein_coding	9.35561	-2.02363	0.896375	-2.25757	0.0239726	0.196636
chrX	153075968	153080968	ENSG00000268883.2	PNMA6B	-	153076968	unprocessed_pseudogene	11.2768	-2.02242	0.779002	-2.59617	0.00942699	0.13173
chr4	173529229	173534229	ENSG00000164107.9	HAND2	-	173530229	protein_coding	27.1521	-2.02195	0.541253	-3.73568	0.00018721	0.0410865
chr13	34909815	34914815	ENSG00000273886.1	Metazoa_SRP	-	34910815	misc_RNA	18.5213	-2.01771	0.623855	-3.23427	0.00121956	0.0682208
chrX	24461244	24466244	ENSG00000067992.17	PDK3	+	24465244	protein_coding	7.95063	-2.01542	0.908395	-2.21866	0.0265097	0.204393
chr1	243006468	243011468	ENSG00000234116.1	ENSG00000234116	-	243007468	lncRNA	48.9979	-2.01425	0.487182	-4.13449	3.56e-05	0.0146193
chrX	137591265	137596265	ENSG00000239579.3	RN7SL325P	+	137595265	misc_RNA	23.0574	-2.013	0.535257	-3.76081	0.00016937	0.0388411
chr1	78745073	78750073	ENSG00000235400.1	ENSG00000235400	+	78749073	processed_pseudogene	49.4164	-2.01276	0.430369	-4.67682	2.91e-06	0.00228723
chrX	71906845	71911845	ENSG00000204131.10	NHSL2	+	71910845	protein_coding	11.8447	-2.01018	0.832593	-2.41436	0.0157627	0.166634
chrX	95449369	95454369	ENSG00000271094.1	ENSG00000271094	+	95453369	processed_pseudogene	10.3959	-2.00848	0.868407	-2.31283	0.020732	0.186193
chrX	32201902	32206902	ENSG00000236285.1	NPM1P8	+	32205902	processed_pseudogene	16.1707	-2.0054	0.80037	-2.50559	0.0122248	0.148787
chr9	28144211	28149211	ENSG00000229060.4	ENSG00000229060	+	28148211	processed_pseudogene	17.8171	-2.0036	0.727314	-2.75479	0.00587296	0.107028
chr12	45050099	45055099	ENSG00000185610.6	DBX2	-	45051099	protein_coding	35.7444	-2.00179	0.438204	-4.56816	4.92e-06	0.0033042
chr6	121649795	121654795	ENSG00000218180.2	SLC25A5P7	+	121653795	processed_pseudogene	28.0893	-2.00125	0.69119	-2.89537	0.00378707	0.089932
chrX	27427231	27432231	ENSG00000235642.1	PTP4A1P5	-	27428231	processed_pseudogene	15.0088	-1.99998	0.774711	-2.58158	0.00983479	0.134131
chrX	13570746	13575746	ENSG00000233357.2	RPL30P15	+	13574746	processed_pseudogene	49.769	-1.99802	0.434601	-4.59737	4.28e-06	0.00301136
chr5	164292696	164297696	ENSG00000241956.11	LINC03000	+	164296696	lncRNA	18.34	-1.99004	0.844752	-2.35576	0.0184847	0.177934
chr5	21878585	21883585	ENSG00000213430.6	HSPD1P1	+	21882585	processed_pseudogene	21.2629	-1.98786	0.646809	-3.07333	0.00211686	0.0751859
chr13	106903099	106908099	ENSG00000277863.1	ENSG00000277863	-	106904099	lncRNA	28.5756	-1.98783	0.506228	-3.92675	8.61e-05	0.0262301
chr4	174419795	174424795	ENSG00000265846.1	MIR4276	+	174423795	miRNA	28.661	-1.98667	0.519179	-3.82656	0.00012995	0.0332843
chrX	135033281	135038281	ENSG00000286964.1	ENSG00000286964	+	135037281	lncRNA	3.98813	-1.98417	1.31766	-1.50582	0.132113	0.378388
chrX	107424630	107429630	ENSG00000214720.4	KRT18P49	+	107428630	processed_pseudogene	15.1947	-1.98355	0.814873	-2.43418	0.0149255	0.162822
chrX	150231896	150236896	ENSG00000234825.3	XRCC6P2	-	150232896	processed_pseudogene	25.9076	-1.98353	0.509153	-3.89575	9.79e-05	0.0280109
chr4	3446638	3451638	ENSG00000286900.1	ENSG00000286900	+	3450638	lncRNA	15.45	-1.9823	0.702905	-2.82015	0.00480005	0.0985306
chr2	121898501	121903501	ENSG00000286481.2	ENSG00000286481	+	121902501	lncRNA	31.8317	-1.97323	0.556082	-3.54845	0.00038751	0.0548582
chrX	78553751	78558751	ENSG00000235061.3	UBE2V1P7	-	78554751	processed_pseudogene	20.0666	-1.97141	0.624938	-3.15457	0.00160735	0.0702555
chr3	150146538	150151538	ENSG00000241143.1	RPL32P9	+	150150538	transcribed_processed_pseudogene	44.1624	-1.97067	0.44279	-4.45058	8.56e-06	0.00492993
chr11	92933441	92938441	ENSG00000255287.1	SNRPGP16	+	92937441	processed_pseudogene	31.0259	-1.9688	0.513036	-3.83754	0.00012427	0.0323802
chrX	13565601	13570601	ENSG00000198759.12	EGFL6	+	13569601	protein_coding	56.176	-1.96829	0.431686	-4.55955	5.13e-06	0.0033042
chr7	144354707	144359707	ENSG00000284644.1	ENSG00000284644	-	144355707	lncRNA	10.5317	-1.96696	0.85322	-2.30533	0.0211479	0.187648
chrX	145764095	145769095	ENSG00000270709.1	UFM1P1	+	145768095	processed_pseudogene	26.358	-1.96662	0.591119	-3.32694	0.00087804	0.0652971
chr4	30720970	30725970	ENSG00000286596.1	ENSG00000286596	-	30721970	lncRNA	23.372	-1.96285	0.587115	-3.34321	0.00082815	0.0652971
chr7	144355181	144360181	ENSG00000244479.7	OR2A1-AS1	-	144356181	lncRNA	9.6727	-1.95439	0.89367	-2.18693	0.0287477	0.21107
chr4	92299966	92304966	ENSG00000152208.13	GRID2	+	92303966	protein_coding	75.9178	-1.95355	0.524952	-3.72139	0.00019813	0.0417127
chr4	147425351	147430351	ENSG00000241281.1	ENSG00000241281	-	147426351	processed_pseudogene	45.1586	-1.95204	0.442719	-4.40921	1.04e-05	0.00569345
chr4	121114299	121119299	ENSG00000271302.1	ENSG00000271302	+	121118299	processed_pseudogene	44.9329	-1.94697	0.46948	-4.14708	3.37e-05	0.0143189
chrX	52068219	52073219	ENSG00000187243.17	MAGED4B	-	52069219	protein_coding	19.245	-1.94563	0.682717	-2.84983	0.00437428	0.0947791
chrX	53336973	53341973	ENSG00000236571.1	ENSG00000236571	-	53337973	processed_pseudogene	32.8602	-1.9444	0.541882	-3.58824	0.00033292	0.0525418
chrX	53336986	53341986	ENSG00000234413.1	MPV17L2P1	+	53340986	processed_pseudogene	32.8602	-1.9444	0.541882	-3.58824	0.00033292	0.0525418
chrX	49199218	49204218	ENSG00000102003.12	SYP	-	49200218	protein_coding	14.0349	-1.94376	0.842136	-2.30813	0.0209921	0.187128
chr6	99993247	99998247	ENSG00000152034.11	MCHR2	-	99994247	protein_coding	29.3551	-1.94311	0.545293	-3.56342	0.00036605	0.0541398
chrX	111507645	111512645	ENSG00000260802.2	SERTM2	+	111511645	protein_coding	28.7193	-1.94091	0.517491	-3.75062	0.0001764	0.0400462
chrX	55216346	55221346	ENSG00000158639.13	PAGE5	+	55220346	protein_coding	21.271	-1.94046	0.559986	-3.46519	0.00052985	0.0579941
chrX	22171983	22176983	ENSG00000224204.1	PHEX-AS1	-	22172983	lncRNA	18.6814	-1.94037	0.661188	-2.93468	0.00333893	0.0860115
chr1	241356374	241361374	ENSG00000182901.18	RGS7	-	241357374	protein_coding	26.5893	-1.93848	0.61893	-3.13198	0.00173629	0.0711076
chrX	45179251	45184251	ENSG00000229491.5	ENSG00000229491	+	45183251	lncRNA	12.5363	-1.93663	0.822152	-2.35556	0.0184949	0.177934
chr3	109644107	109649107	ENSG00000242029.1	ENSG00000242029	+	109648107	lncRNA	14.3943	-1.92947	0.852461	-2.26341	0.0236105	0.195499
chrX	26156601	26161601	ENSG00000232030.4	MAGEB6B	+	26160601	protein_coding	9.42573	-1.92854	0.898254	-2.14699	0.031794	0.219135
chr20	64048639	64053639	ENSG00000203883.7	SOX18	-	64049639	protein_coding	8.81383	-1.92486	0.936955	-2.05438	0.0399387	0.238501
chr9	28535735	28540735	ENSG00000287551.1	ENSG00000287551	+	28539735	lncRNA	28.4062	-1.92457	0.578518	-3.32673	0.00087871	0.0652971
chr7	116316751	116321751	ENSG00000213167.3	Metazoa_SRP	+	116320751	misc_RNA	32.9984	-1.92244	0.523165	-3.67463	0.00023819	0.045467
chr16	84113030	84118030	ENSG00000260018.2	MBTPS1-DT	+	84117030	lncRNA	3.46326	-1.92242	1.74907	-1.09911	0.27172	0.520996
chr3	106426977	106431977	ENSG00000286854.1	ENSG00000286854	-	106427977	lncRNA	32.3423	-1.92145	0.577909	-3.32483	0.00088472	0.0652971
chr12	45046901	45051901	ENSG00000257319.1	DBX2-AS1	+	45050901	lncRNA	31.7909	-1.92121	0.463937	-4.14109	3.46e-05	0.014337
chr18	60495336	60500336	ENSG00000267400.1	ENSG00000267400	-	60496336	processed_pseudogene	19.8718	-1.92014	0.60259	-3.18648	0.00144017	0.0697008
chr2	132036993	132041993	ENSG00000226886.1	ENSG00000226886	-	132037993	processed_pseudogene	29.5057	-1.91889	0.496606	-3.864	0.00011154	0.0306279
chr3	1088658	1093658	ENSG00000134115.13	CNTN6	+	1092658	protein_coding	59.5808	-1.91834	0.521162	-3.68088	0.00023243	0.0451807
chr13	102899339	102904339	ENSG00000278445.1	ENSG00000278445	+	102903339	lncRNA	44.2122	-1.91766	0.431002	-4.44931	8.61e-06	0.00492993
chrX	107351843	107356843	ENSG00000215007.3	DNAJA1P3	-	107352843	processed_pseudogene	37.9772	-1.91649	0.474881	-4.03573	5.44e-05	0.0197217
chr2	204472837	204477837	ENSG00000236634.1	ENSG00000236634	-	204473837	lncRNA	61.9045	-1.91615	0.410709	-4.66547	3.08e-06	0.00235671
chr14	60505146	60510146	ENSG00000184302.7	SIX6	+	60509146	protein_coding	72.4022	-1.91148	0.340457	-5.61446	1.97e-08	3.77e-05
chrX	63762875	63767875	ENSG00000236813.1	BTF3P8	+	63766875	processed_pseudogene	28.6639	-1.91046	0.529864	-3.60556	0.00031148	0.0519546
chr7	20578072	20583072	ENSG00000179460.5	EEF1A1P27	+	20582072	processed_pseudogene	24.1095	-1.91013	0.619411	-3.08378	0.00204386	0.0746271
chrX	74375885	74380885	ENSG00000213269.2	RPS6P26	-	74376885	processed_pseudogene	21.9707	-1.90966	0.569704	-3.35203	0.00080221	0.0652971
chr9	27609745	27614745	ENSG00000215441.3	CTAGE12P	-	27610745	processed_pseudogene	60.191	-1.90885	0.45735	-4.17373	3e-05	0.0133776
chrX	83748939	83753939	ENSG00000215102.2	TERF1P4	-	83749939	processed_pseudogene	15.6791	-1.90834	0.70416	-2.71009	0.00672645	0.11384
chrX	154650546	154655546	ENSG00000226141.1	ENSG00000226141	+	154654546	unprocessed_pseudogene	20.3495	-1.9078	0.609795	-3.1286	0.00175642	0.0711076
chr18	67077584	67082584	ENSG00000263354.1	MIR5011	+	67081584	miRNA	16.7016	-1.90623	0.709751	-2.68577	0.0072363	0.117643
chr10	53034285	53039285	ENSG00000231399.1	SNRPEP8	+	53038285	processed_pseudogene	26.1394	-1.90582	0.63782	-2.98803	0.00280785	0.0809152
chrX	107028248	107033248	ENSG00000231144.1	EEF1A1P40	+	107032248	processed_pseudogene	28.963	-1.90424	0.559876	-3.40117	0.00067097	0.0630529
chr5	20301565	20306565	ENSG00000249854.3	CDH18-AS1	+	20305565	lncRNA	23.7598	-1.90352	0.630334	-3.01986	0.00252891	0.0789548
chr4	115112876	115117876	ENSG00000138653.10	NDST4	-	115113876	protein_coding	17.3376	-1.89864	0.687965	-2.7598	0.00578375	0.106384
chrX	73830270	73835270	ENSG00000277577.1	ENSG00000277577	-	73831270	misc_RNA	62.7669	-1.89763	0.42645	-4.44982	8.59e-06	0.00492993
chr5	51100643	51105643	ENSG00000278734.1	ENSG00000278734	-	51101643	processed_pseudogene	54.3705	-1.89703	0.406908	-4.66206	3.13e-06	0.00236652
chr4	92303178	92308178	ENSG00000248511.1	ENSG00000248511	-	92304178	lncRNA	58.364	-1.89159	1.15311	-1.64042	0.100917	0.339394
chr5	100899394	100904394	ENSG00000289912.1	ENSG00000289912	+	100903394	lncRNA	12.2237	-1.89156	0.797452	-2.37201	0.0176917	0.174894
chrX	140927738	140932738	ENSG00000229269.1	ENSG00000229269	+	140931738	lncRNA	11.4338	-1.89108	0.872174	-2.16824	0.0301402	0.214852
chrX	136787064	136792064	ENSG00000231164.1	RPL7P56	+	136791064	processed_pseudogene	26.632	-1.88906	0.565449	-3.34081	0.00083534	0.0652971
chr7	144290480	144295480	ENSG00000228960.6	OR2A9P	+	144294480	transcribed_unprocessed_pseudogene	7.52939	-1.88851	0.9491	-1.98979	0.046614	0.251988
chrX	74300180	74305180	ENSG00000187969.6	ZCCHC13	+	74304180	protein_coding	14.5786	-1.88561	0.682282	-2.76368	0.00571528	0.105952
chr13	105504681	105509681	ENSG00000232307.1	DAOA-AS1	-	105505681	lncRNA	22.6443	-1.88493	0.532577	-3.53927	0.00040124	0.0548994
chrX	121204014	121209014	ENSG00000234176.1	HSPA8P1	-	121205014	processed_pseudogene	8.30846	-1.88482	1.00783	-1.87018	0.0614586	0.280503
chr5	112224283	112229283	ENSG00000251076.1	ENSG00000251076	+	112228283	lncRNA	26.9339	-1.88432	0.567104	-3.32271	0.00089147	0.0652971
chrX	70259204	70264204	ENSG00000186912.7	P2RY4	-	70260204	protein_coding	24.7451	-1.88382	0.574016	-3.28182	0.00103141	0.066448
chr6	58120029	58125029	ENSG00000214561.3	RBBP4P4	-	58121029	processed_pseudogene	35.7603	-1.88234	0.536414	-3.50911	0.00044961	0.0557294
chrX	83508214	83513214	ENSG00000279437.1	ENSG00000279437	-	83509214	TEC	14.1754	-1.8816	0.696055	-2.70323	0.00686694	0.11479
chr4	54095523	54100523	ENSG00000180613.11	GSX2	+	54099523	protein_coding	42.5876	-1.87874	0.464359	-4.04589	5.21e-05	0.0192749
chr17	34610409	34615409	ENSG00000278860.1	ENSG00000278860	+	34614409	TEC	29.9355	-1.87806	0.489221	-3.83888	0.0001236	0.0323802
chrX	135709639	135714639	ENSG00000268940.6	CT45A1	+	135713639	protein_coding	16.1534	-1.87666	0.71078	-2.64028	0.00828368	0.124767
chrX	134369288	134374288	ENSG00000156531.18	PHF6	+	134373288	protein_coding	15.2471	-1.87649	0.738902	-2.53957	0.0110989	0.142287
chrX	136984705	136989705	ENSG00000237307.2	SRRM1P3	-	136985705	processed_pseudogene	9.11683	-1.87365	0.885389	-2.11619	0.0343284	0.225802
chrX	150954587	150959587	ENSG00000222796.1	RNU6-383P	-	150955587	snRNA	14.1567	-1.87345	0.730674	-2.56401	0.0103471	0.137614
chrX	73820724	73825724	ENSG00000274655.1	ENSG00000274655	-	73821724	misc_RNA	51.38	-1.8726	0.436196	-4.29302	1.76e-05	0.0086343
chrX	93038490	93043490	ENSG00000237873.1	DLGAP5P2	+	93042490	processed_pseudogene	14.8134	-1.87206	0.757722	-2.47064	0.013487	0.155349
chr7	87058654	87063654	ENSG00000164659.15	ELAPOR2	-	87059654	protein_coding	19.7132	-1.87094	0.721204	-2.59419	0.00948146	0.132067
chr14	22502644	22507644	ENSG00000211854.1	TRAJ35	+	22506644	TR_J_gene	39.7177	-1.86963	0.502808	-3.71838	0.00020051	0.0420462
chr12	20449083	20454083	ENSG00000131982.5	UBE2L2	-	20450083	processed_pseudogene	89.957	-1.86644	0.392951	-4.7498	2.04e-06	0.00166237
chr8	40149482	40154482	ENSG00000176907.5	TCIM	+	40153482	protein_coding	17.2172	-1.86481	0.614028	-3.03701	0.00238937	0.07812
chr8	57851500	57856500	ENSG00000205293.5	LINC01602	+	57855500	lncRNA	27.4885	-1.86405	0.565829	-3.29437	0.00098644	0.0662455
chrX	94638570	94643570	ENSG00000232293.2	PAICSP7	-	94639570	processed_pseudogene	15.581	-1.86298	0.701452	-2.65588	0.00791011	0.122401
chrX	135075597	135080597	ENSG00000234228.1	NCLP2	-	135076597	processed_pseudogene	49.7572	-1.85876	0.512798	-3.62475	0.00028924	0.0504351
chr20	64045836	64050836	ENSG00000171703.17	TCEA2	+	64049836	protein_coding	11.34	-1.85816	0.760982	-2.44179	0.0146146	0.161239
chr8	69462624	69467624	ENSG00000137573.14	SULF1	+	69466624	protein_coding	35.6387	-1.85776	0.470102	-3.95183	7.76e-05	0.0248634
chr16	86562829	86567829	ENSG00000176692.8	FOXC2	+	86566829	protein_coding	11.0594	-1.857	0.756234	-2.45558	0.0140656	0.158146
chr6	122741280	122746280	ENSG00000240606.3	RN7SL564P	+	122745280	misc_RNA	37.1331	-1.85538	0.492014	-3.771	0.0001626	0.0378556
chr21	42314409	42319409	ENSG00000160180.17	TFF3	-	42315409	protein_coding	16.3279	-1.8544	0.692377	-2.67831	0.00739944	0.11861
chrX	146026872	146031872	ENSG00000216056.1	MIR891A	-	146027872	miRNA	14.8064	-1.85403	0.76554	-2.42186	0.0154415	0.165098
chr4	167233796	167238796	ENSG00000196104.11	SPOCK3	-	167234796	protein_coding	41.8415	-1.85333	0.469765	-3.94524	7.97e-05	0.0252923
chrX	149052712	149057712	ENSG00000242186.2	ENSG00000242186	+	149056712	transcribed_unitary_pseudogene	18.2458	-1.85125	0.707302	-2.61733	0.00886199	0.128071
chr4	174375445	174380445	ENSG00000249875.1	ENSG00000249875	-	174376445	lncRNA	49.6631	-1.85066	0.408342	-4.53212	5.84e-06	0.0036862
chr14	22503666	22508666	ENSG00000211855.1	TRAJ34	+	22507666	TR_J_gene	35.9695	-1.85038	0.512953	-3.60731	0.00030938	0.051902
chr1	240742904	240747904	ENSG00000230015.4	ENSG00000230015	-	240743904	lncRNA	47.3038	-1.84897	0.465236	-3.97426	7.06e-05	0.0233917
chr5	84378424	84383424	ENSG00000250320.7	EDIL3-DT	+	84382424	lncRNA	20.6497	-1.84837	0.644562	-2.86764	0.0041354	0.0929395
chr12	59053184	59058184	ENSG00000257288.1	ENSG00000257288	-	59054184	processed_pseudogene	23.0942	-1.84799	0.580412	-3.18393	0.00145289	0.0697008
chrX	120984760	120989760	ENSG00000236371.6	CT47A1	-	120985760	protein_coding	15.5964	-1.84567	0.65881	-2.80153	0.00508613	0.10069
chr6	127316973	127321973	ENSG00000251768.1	RNA5SP217	-	127317973	rRNA_pseudogene	31.7304	-1.84454	0.521905	-3.53425	0.00040894	0.0548994
chrX	42173385	42178385	ENSG00000206896.1	RNU6-1124P	-	42174385	snRNA	28.9659	-1.84355	0.498438	-3.69865	0.00021675	0.043372
chrX	148048233	148053233	ENSG00000219507.4	FTH1P8	+	148052233	processed_pseudogene	18.3616	-1.84132	0.714928	-2.57553	0.0100086	0.135076
chrX	50200007	50205007	ENSG00000147081.15	AKAP4	-	50201007	protein_coding	14.8633	-1.83841	0.731405	-2.51353	0.0119531	0.147379
chr5	112188020	112193020	ENSG00000251187.5	ENSG00000251187	+	112192020	lncRNA	36.8444	-1.8381	0.458091	-4.01252	6.01e-05	0.0212628
chr13	103443968	103448968	ENSG00000230474.1	ATP6V1G1P7	-	103444968	processed_pseudogene	26.6908	-1.8368	0.524462	-3.50226	0.00046133	0.0563275
chr3	150079117	150084117	ENSG00000243321.3	LINC01998	-	150080117	lncRNA	33.5882	-1.83624	0.498133	-3.68624	0.00022759	0.0446665
chr2	166179966	166184966	ENSG00000222376.1	RN7SKP152	-	166180966	misc_RNA	44.7906	-1.83607	0.43476	-4.22317	2.41e-05	0.0111743
chr6	122775716	122780716	ENSG00000164434.12	FABP7	+	122779716	protein_coding	52.4141	-1.83346	0.480889	-3.81264	0.00013749	0.0343624
chrX	152697700	152702700	ENSG00000287394.1	ENSG00000287394	-	152698700	lncRNA	19.9747	-1.83241	0.582062	-3.14813	0.00164318	0.0703482
chrX	139358040	139363040	ENSG00000173954.8	SNURFL	+	139362040	processed_pseudogene	18.8698	-1.82995	0.573117	-3.19297	0.00140816	0.0697008
chr9	40344599	40349599	ENSG00000232433.2	GXYLT1P3	+	40348599	processed_pseudogene	23.8769	-1.82961	0.574228	-3.18621	0.00144148	0.0697008
chrX	115698811	115703811	ENSG00000234785.1	EEF1GP5	+	115702811	processed_pseudogene	7.67025	-1.82923	0.933757	-1.959	0.0501126	0.259624
chrX	48002989	48007989	ENSG00000147118.12	ZNF182	-	48003989	protein_coding	10.5572	-1.82811	0.831361	-2.19894	0.0278825	0.208647
chr8	85983323	85988323	ENSG00000147614.4	ATP6V0D2	+	85987323	protein_coding	39.5299	-1.82791	0.441376	-4.14138	3.45e-05	0.014337
chr21	13720189	13725189	ENSG00000278618.1	MIR8069	+	13724189	miRNA	2.81448	-1.82724	1.67344	-1.09191	0.274874	0.523902
chr8	86742675	86747675	ENSG00000170289.13	CNGB3	-	86743675	protein_coding	40.4376	-1.82638	0.493941	-3.69757	0.00021767	0.0434156
chr9	132158058	132163058	ENSG00000196358.12	NTNG2	+	132162058	protein_coding	25.8453	-1.82487	0.544976	-3.34853	0.00081241	0.0652971
chrX	149770068	149775068	ENSG00000171116.7	HSFX1	+	149774068	protein_coding	38.3575	-1.82252	0.481779	-3.7829	0.00015501	0.0366474
chr16	81440808	81445808	ENSG00000153815.18	CMIP	+	81444808	protein_coding	28.0617	-1.82216	0.52528	-3.46893	0.00052254	0.0579941
chr3	104498700	104503700	ENSG00000243635.1	ENSG00000243635	+	104502700	processed_pseudogene	18.3825	-1.81907	0.703061	-2.58736	0.00967155	0.133257
chrX	21373265	21378265	ENSG00000283380.1	ENSG00000283380	-	21374265	lncRNA	71.0597	-1.81856	0.405075	-4.48943	7.14e-06	0.00432944
chr6	55578197	55583197	ENSG00000146151.14	HMGCLL1	-	55579197	protein_coding	13.1677	-1.81534	0.848539	-2.13937	0.0324055	0.220988
chrX	72908615	72913615	ENSG00000283594.1	FAM236C	+	72912615	protein_coding	35.646	-1.81364	0.455351	-3.98296	6.81e-05	0.0230253
chr4	173912252	173917252	ENSG00000250043.1	ENSG00000250043	-	173913252	lncRNA	17.9485	-1.8122	0.707558	-2.5612	0.0104311	0.138071
chr2	181679827	181684827	ENSG00000162992.5	NEUROD1	-	181680827	protein_coding	40.1057	-1.81212	0.442487	-4.0953	4.22e-05	0.0165493
chr20	45114174	45119174	ENSG00000175121.12	WFDC5	-	45115174	protein_coding	48.5527	-1.81212	0.468716	-3.86614	0.00011057	0.0304983
chrX	136579240	136584240	ENSG00000252320.1	RNU6-320P	+	136583240	snRNA	20.5093	-1.81175	0.652885	-2.77499	0.0055203	0.10437
chrX	135709377	135714377	ENSG00000274601.1	ENSG00000274601	-	135710377	unprocessed_pseudogene	17.3479	-1.81081	0.699353	-2.58926	0.00961815	0.132945
chrX	110439372	110444372	ENSG00000133136.6	GNG5P2	-	110440372	protein_coding	31.3576	-1.81058	0.566967	-3.19346	0.00140581	0.0697008
chrX	147811974	147816974	ENSG00000271175.1	ENSG00000271175	-	147812974	processed_pseudogene	15.6229	-1.80966	0.688933	-2.62676	0.00862019	0.126467
chr7	93573730	93578730	ENSG00000004948.16	CALCR	-	93574730	protein_coding	104.466	-1.80883	0.376819	-4.80026	1.58e-06	0.00135395
chr14	60511119	60516119	ENSG00000258670.1	ENSG00000258670	+	60515119	lncRNA	36.1609	-1.80881	0.449563	-4.0235	5.73e-05	0.0205325
chr7	50399097	50404097	ENSG00000285165.1	ENSG00000285165	-	50400097	lncRNA	44.2015	-1.80724	0.411657	-4.39015	1.13e-05	0.00605868
chrX	92766855	92771855	ENSG00000285445.1	TUSC2P2	+	92770855	processed_pseudogene	8.78037	-1.80714	0.901357	-2.00491	0.0449726	0.248627
chrX	51799007	51804007	ENSG00000179222.18	MAGED1	+	51803007	protein_coding	24.4412	-1.8071	0.512581	-3.52548	0.00042272	0.0550717
chrX	143719752	143724752	ENSG00000268988.2	SPANXN2	-	143720752	protein_coding	12.7949	-1.80673	0.682273	-2.64811	0.00809436	0.123526
chr2	166375001	166380001	ENSG00000169432.19	SCN9A	-	166376001	protein_coding	43.8632	-1.80634	0.489179	-3.6926	0.00022198	0.043987
chr5	100902282	100907282	ENSG00000113532.13	ST8SIA4	-	100903282	protein_coding	22.9534	-1.80627	0.561107	-3.21912	0.00128583	0.0684766
chr10	83911922	83916922	ENSG00000233258.1	ENSG00000233258	-	83912922	lncRNA	41.7246	-1.80316	0.455593	-3.95784	7.56e-05	0.0245029
chrX	145232619	145237619	ENSG00000234712.1	ENSG00000234712	-	145233619	lncRNA	13.09	-1.79965	0.712676	-2.52521	0.0115631	0.145386
chrX	12582526	12587526	ENSG00000273800.1	ENSG00000273800	-	12583526	unprocessed_pseudogene	8.89026	-1.79848	0.973746	-1.84697	0.0647519	0.285519
chr12	29783759	29788759	ENSG00000133687.16	TMTC1	-	29784759	protein_coding	11.3092	-1.79312	0.867956	-2.06591	0.0388371	0.235616
chrX	152752884	152757884	ENSG00000268606.6	MAGEA2	-	152753884	protein_coding	44.8688	-1.79263	0.493605	-3.63172	0.00028154	0.0493786
chr4	121072021	121077021	ENSG00000173376.14	NDNF	-	121073021	protein_coding	50.1269	-1.78954	0.399553	-4.47885	7.5e-06	0.0044613
chrX	112657657	112662657	ENSG00000200436.1	Y_RNA	+	112661657	misc_RNA	33.0386	-1.78879	0.517663	-3.45551	0.00054925	0.0580902
chr18	34223952	34228952	ENSG00000101746.16	NOL4	-	34224952	protein_coding	52.024	-1.78856	0.454943	-3.93139	8.45e-05	0.0259871
chr4	36391410	36396410	ENSG00000251438.1	ENSG00000251438	-	36392410	lncRNA	26.5938	-1.78818	0.617184	-2.89733	0.00376355	0.0898491
chr5	84383880	84388880	ENSG00000164176.13	EDIL3	-	84384880	protein_coding	21.5225	-1.78708	0.604744	-2.95511	0.0031256	0.08421
chr5	102496541	102501541	ENSG00000249017.1	ENSG00000249017	+	102500541	lncRNA	27.8036	-1.78594	0.55631	-3.21034	0.00132578	0.0686224
chrX	12787355	12792355	ENSG00000101911.13	PRPS2	+	12791355	protein_coding	13.6927	-1.78344	0.736521	-2.42143	0.0154594	0.165161
chr14	77136683	77141683	ENSG00000269883.1	ENSG00000269883	+	77140683	lncRNA	21.5174	-1.78248	0.596615	-2.98765	0.00281132	0.0809152
chrX	108732011	108737011	ENSG00000237863.3	IRS4-AS1	+	108736011	lncRNA	74.4408	-1.78238	0.34439	-5.17546	2.27e-07	0.00025312
chr18	34218965	34223965	ENSG00000267746.1	ENSG00000267746	+	34222965	lncRNA	40.8766	-1.78203	0.546362	-3.26162	0.00110777	0.0676701
chr18	34220603	34225603	ENSG00000280406.1	ENSG00000280406	-	34221603	TEC	30.7793	-1.78172	0.51527	-3.45783	0.00054455	0.0580902
chr3	103523116	103528116	ENSG00000265328.1	MIR548AB	-	103524116	miRNA	27.0885	-1.78108	0.615631	-2.8931	0.00381461	0.0900726
chr10	55626942	55631942	ENSG00000150275.20	PCDH15	-	55627942	protein_coding	17.1045	-1.78073	0.636071	-2.79958	0.00511694	0.100723
chr5	100017804	100022804	ENSG00000199378.1	Y_RNA	+	100021804	misc_RNA	12.7747	-1.78046	0.740182	-2.40544	0.016153	0.16834
chrX	136483947	136488947	ENSG00000102239.5	BRS3	+	136487947	protein_coding	53.7646	-1.77874	0.42256	-4.20943	2.56e-05	0.0117866
chrX	99720158	99725158	ENSG00000215070.4	XRCC6P5	-	99721158	processed_pseudogene	11.4785	-1.77808	0.921063	-1.93046	0.0535494	0.266775
chrX	72276248	72281248	ENSG00000198034.11	RPS4X	-	72277248	protein_coding	16.2723	-1.77717	0.685131	-2.59391	0.00948908	0.132084
chrX	17371200	17376200	ENSG00000188158.17	NHS	+	17375200	protein_coding	48.9076	-1.77656	0.418546	-4.24459	2.19e-05	0.0103947
chrX	154212487	154217487	ENSG00000274962.1	TEX28P1	-	154213487	unprocessed_pseudogene	8.0668	-1.7719	0.976555	-1.81444	0.0696098	0.293542
chr2	181679665	181684665	ENSG00000188452.15	CERKL	-	181680665	protein_coding	40.4289	-1.77166	0.445338	-3.97825	6.94e-05	0.0233575
chrX	148197878	148202878	ENSG00000233467.2	HAX1P1	-	148198878	processed_pseudogene	7.8089	-1.77148	0.978552	-1.81031	0.0702477	0.295203
chrX	98385512	98390512	ENSG00000213704.3	EEF1A1P15	+	98389512	processed_pseudogene	22.3335	-1.76902	0.607029	-2.91423	0.00356568	0.0881122
chr10	26212665	26217665	ENSG00000136750.13	GAD2	+	26216665	protein_coding	55.3819	-1.76822	0.386326	-4.57703	4.72e-06	0.00324579
chr2	210547950	210552950	ENSG00000288732.2	ENSG00000288732	-	210548950	lncRNA	84.1327	-1.76819	0.407332	-4.3409	1.42e-05	0.00719395
chr10	25932710	25937710	ENSG00000226304.1	ENSG00000226304	-	25933710	lncRNA	25.4494	-1.76623	0.577699	-3.05735	0.00223305	0.0767737
chr22	18629984	18634984	ENSG00000286175.1	FAM246B	+	18633984	protein_coding	10.9464	-1.76594	0.840145	-2.10194	0.0355583	0.22866
chrX	47583429	47588429	ENSG00000263858.1	MIR4769	+	47587429	miRNA	13.1855	-1.75977	0.811496	-2.16855	0.0301166	0.21473
chrX	544352	549352	ENSG00000229232.6	KRT18P53	-	545352	processed_pseudogene	28.9826	-1.75847	0.532438	-3.30267	0.00095769	0.0659541
chr4	148443698	148448698	ENSG00000151623.15	NR3C2	-	148444698	protein_coding	49.4209	-1.75616	0.488763	-3.59307	0.0003268	0.0525418
chrX	140393062	140398062	ENSG00000224942.1	EEDP1	+	140397062	processed_pseudogene	27.7283	-1.75564	0.56577	-3.1031	0.00191507	0.0732897
chr4	154780873	154785873	ENSG00000249041.1	ENSG00000249041	-	154781873	lncRNA	38.3027	-1.75405	0.462878	-3.78945	0.00015098	0.0358967
chr2	166884480	166889480	ENSG00000163092.22	XIRP2	+	166888480	protein_coding	27.3801	-1.75365	0.572659	-3.0623	0.00219646	0.0765039
chrX	47384649	47389649	ENSG00000221459.1	SNORA11C	+	47388649	snoRNA	16.93	-1.75241	0.647735	-2.70544	0.0068213	0.114371
chrX	153658162	153663162	ENSG00000237793.3	RPL18AP16	+	153662162	processed_pseudogene	14.7872	-1.75233	0.741565	-2.36302	0.0181266	0.176599
chrX	26143774	26148774	ENSG00000232446.1	ENSG00000232446	+	26147774	unprocessed_pseudogene	14.4304	-1.75046	0.656034	-2.66824	0.00762503	0.12021
chr5	101577830	101582830	ENSG00000277506.1	RN7SL802P	+	101581830	misc_RNA	25.7344	-1.74902	0.570875	-3.06375	0.00218581	0.0761827
chr2	233979018	233984018	ENSG00000286059.1	ENSG00000286059	-	233980018	lncRNA	60.9376	-1.74882	0.406932	-4.29758	1.73e-05	0.00852681
chr16	85814062	85819062	ENSG00000270698.1	ENSG00000270698	-	85815062	processed_pseudogene	16.5983	-1.74779	0.656982	-2.66033	0.00780637	0.121467
chr3	125720539	125725539	ENSG00000228963.3	OR7E93P	+	125724539	unprocessed_pseudogene	50.0791	-1.74508	0.438832	-3.97665	6.99e-05	0.0233863
chr7	108002213	108007213	ENSG00000091136.15	LAMB1	-	108003213	protein_coding	117.639	-1.74443	0.333892	-5.22454	1.75e-07	0.00021817
chr4	173469041	173474041	ENSG00000261646.1	ENSG00000261646	-	173470041	lncRNA	42.8697	-1.74427	0.470938	-3.70382	0.00021237	0.0433675
chrX	110439318	110444318	ENSG00000101935.13	AMMECR1	-	110440318	protein_coding	30.6675	-1.74255	0.568438	-3.0655	0.00217308	0.0759043
chrX	111623726	111628726	ENSG00000236189.2	RPL18AP15	-	111624726	processed_pseudogene	13.0265	-1.74152	0.757602	-2.29873	0.0215201	0.188758
chr7	138403523	138408523	ENSG00000213237.4	PTMAP10	-	138404523	processed_pseudogene	14.8448	-1.74148	0.693101	-2.51258	0.0119851	0.14761
chrX	135946139	135951139	ENSG00000230162.1	CT45A11P	-	135947139	unprocessed_pseudogene	13.0383	-1.7404	0.707553	-2.45975	0.0139033	0.157799
chr14	104588847	104593847	ENSG00000259037.1	ENSG00000259037	-	104589847	lncRNA	25.3385	-1.74034	0.53794	-3.23519	0.00121561	0.0682208
chr7	19140293	19145293	ENSG00000229533.1	ENSG00000229533	+	19144293	lncRNA	41.2748	-1.74032	0.471495	-3.69107	0.00022331	0.0441089
chr5	102498016	102503016	ENSG00000205359.10	SLCO6A1	-	102499016	protein_coding	29.2214	-1.73836	0.527296	-3.29673	0.00097816	0.0662455
chr2	166888884	166893884	ENSG00000225182.1	ENSG00000225182	-	166889884	processed_pseudogene	33.545	-1.73772	0.541544	-3.20882	0.0013328	0.0687195
chrX	135097712	135102712	ENSG00000196972.9	SMIM10L2B	-	135098712	protein_coding	42.1345	-1.73557	0.518801	-3.34535	0.0008218	0.0652971
chr4	175402110	175407110	ENSG00000248551.1	ENSG00000248551	-	175403110	lncRNA	33.5093	-1.73521	0.508088	-3.41517	0.00063742	0.0618551
chr3	117715859	117720859	ENSG00000242816.2	ENSG00000242816	+	117719859	lncRNA	28.6502	-1.7299	0.589814	-2.93295	0.00335753	0.0861122
chr13	25367974	25372974	ENSG00000132932.19	ATP8A2	+	25371974	protein_coding	37.7851	-1.72803	0.462217	-3.73858	0.00018506	0.0407622
chr6	123799865	123804865	ENSG00000188580.15	NKAIN2	+	123803865	protein_coding	108.787	-1.72634	0.390441	-4.42152	9.8e-06	0.00545561
chr2	70896576	70901576	ENSG00000116035.4	VAX2	+	70900576	protein_coding	8.74578	-1.72223	0.985601	-1.74739	0.0805697	0.310667
chrX	118970614	118975614	ENSG00000175556.17	LONRF3	+	118974614	protein_coding	38.3016	-1.72221	0.459517	-3.74786	0.00017835	0.0402979
chrX	72284045	72289045	ENSG00000238926.1	Y_RNA	-	72285045	misc_RNA	23.8298	-1.72173	0.572084	-3.00957	0.00261618	0.0798396
chrX	115991773	115996773	ENSG00000266828.2	RN7SL712P	-	115992773	misc_RNA	25.8933	-1.7211	0.580534	-2.96469	0.00302984	0.0833664
chr14	22501110	22506110	ENSG00000276699.1	TRAJ36	+	22505110	TR_J_gene	42.0349	-1.72104	0.459721	-3.74367	0.00018135	0.0404882
chr11	36692317	36697317	ENSG00000254498.1	ENSG00000254498	+	36696317	processed_pseudogene	26.7888	-1.72067	0.608261	-2.82884	0.00467167	0.0974039
chrX	114648655	114653655	ENSG00000276158.2	MIR1264	+	114652655	miRNA	20.2612	-1.72017	0.634681	-2.71029	0.00672237	0.113807
chr4	148689032	148694032	ENSG00000250357.1	ENSG00000250357	+	148693032	lncRNA	20.2462	-1.71962	0.573412	-2.99893	0.0027093	0.0801816
chrX	52651207	52656207	ENSG00000228354.1	ENSG00000228354	+	52655207	processed_pseudogene	27.6786	-1.71817	0.57328	-2.9971	0.00272565	0.0802005
chr2	21197896	21202896	ENSG00000271629.1	ENSG00000271629	-	21198896	processed_pseudogene	53.8572	-1.71759	0.430349	-3.99115	6.58e-05	0.0226196
chrX	12145126	12150126	ENSG00000206795.1	Y_RNA	+	12149126	misc_RNA	14.9261	-1.7162	0.694451	-2.47131	0.0134621	0.155237
chr13	80007077	80012077	ENSG00000281721.1	LINC01080	+	80011077	lncRNA	37.1629	-1.71616	0.508837	-3.3727	0.00074434	0.0652971
chr4	37240991	37245991	ENSG00000264319.1	MIR4801	-	37241991	miRNA	16.6209	-1.71607	0.696945	-2.46227	0.013806	0.157045
chrX	40534563	40539563	ENSG00000238730.1	RNU7-164P	-	40535563	snRNA	25.7811	-1.71427	0.612251	-2.79995	0.0051111	0.100723
chrX	71762075	71767075	ENSG00000234442.4	ENSG00000234442	-	71763075	transcribed_unprocessed_pseudogene	44.8365	-1.71391	0.421713	-4.06416	4.82e-05	0.0182207
chr7	55240247	55245247	ENSG00000237210.1	ENSG00000237210	+	55244247	processed_pseudogene	35.7326	-1.71359	0.520303	-3.29345	0.00098967	0.0662455
chrX	92103768	92108768	ENSG00000289479.1	ENSG00000289479	-	92104768	lncRNA	8.62613	-1.71292	0.983071	-1.74242	0.0814345	0.312007
chrX	27462341	27467341	ENSG00000224960.5	PPP4R3C	-	27463341	protein_coding	16.1864	-1.71239	0.675455	-2.53516	0.0112394	0.14302
chr7	95541191	95546191	ENSG00000231170.7	PDK4-AS1	+	95545191	lncRNA	27.7741	-1.71186	0.532901	-3.21235	0.00131654	0.0685388
chr2	40450752	40455752	ENSG00000288992.2	ENSG00000288992	-	40451752	lncRNA	62.3885	-1.71086	0.462551	-3.69875	0.00021667	0.043372
chr5	67375378	67380378	ENSG00000249364.7	LINC02997	+	67379378	lncRNA	40.0499	-1.71053	0.523274	-3.2689	0.00107968	0.0672542
chrX	152045193	152050193	ENSG00000228965.1	RPSAP60	-	152046193	processed_pseudogene	11.5103	-1.71025	0.799537	-2.13906	0.0324312	0.221073
chrX	50469825	50474825	ENSG00000274588.2	DGKK	-	50470825	protein_coding	98.7693	-1.71008	0.42319	-4.04092	5.32e-05	0.0195214
chr6	14230570	14235570	ENSG00000230631.1	ENSG00000230631	-	14231570	lncRNA	25.6097	-1.70927	0.608397	-2.80946	0.00496247	0.099856
chrX	73531503	73536503	ENSG00000237475.2	RPL7P53	+	73535503	processed_pseudogene	13.0101	-1.70919	0.804202	-2.12533	0.0335592	0.22382
chr4	154783118	154788118	ENSG00000222582.1	RNU2-66P	+	154787118	snRNA	34.5905	-1.70888	0.488642	-3.49721	0.00047015	0.0566701
chr8	56207686	56212686	ENSG00000170791.18	CHCHD7	+	56211686	protein_coding	31.1964	-1.70873	0.543173	-3.14584	0.00165612	0.0703482
chrX	18983114	18988114	ENSG00000044446.12	PHKA2	-	18984114	protein_coding	8.90007	-1.70788	1.01668	-1.67986	0.0929853	0.328472
chr4	148526139	148531139	ENSG00000251418.2	ASS1P8	-	148527139	processed_pseudogene	23.4063	-1.7064	0.536936	-3.17802	0.00148283	0.0697008
chr2	55951014	55956014	ENSG00000202344.1	RN7SKP208	-	55952014	misc_RNA	46.7754	-1.70544	0.474544	-3.59385	0.00032582	0.0525418
chr5	20304448	20309448	ENSG00000214132.4	ENSG00000214132	-	20305448	processed_pseudogene	17.0786	-1.70528	0.773862	-2.2036	0.0275528	0.207752
chrX	116693188	116698188	ENSG00000230159.1	ENSG00000230159	-	116694188	lncRNA	12.8198	-1.70426	0.736661	-2.31349	0.0206957	0.186054
chrX	75578676	75583676	ENSG00000224775.2	BRAFP1	+	75582676	unprocessed_pseudogene	12.0153	-1.69868	0.809271	-2.09903	0.0358143	0.229386
chr3	178171449	178176449	ENSG00000286003.1	ENSG00000286003	-	178172449	lncRNA	31.45	-1.69795	0.514782	-3.29838	0.00097245	0.0662455
chr12	92427148	92432148	ENSG00000205057.6	CLLU1-AS1	-	92428148	lncRNA	25.269	-1.69626	0.527419	-3.21616	0.00129919	0.0685205
chrX	103769718	103774718	ENSG00000123560.14	PLP1	+	103773718	protein_coding	54.2683	-1.69534	0.433787	-3.90823	9.3e-05	0.0274964
chr16	86343387	86348387	ENSG00000269826.1	ENSG00000269826	+	86347387	lncRNA	43.2225	-1.69472	0.43765	-3.87232	0.0001078	0.0300049
chr6	49495923	49500923	ENSG00000203972.10	GLYATL3	+	49499923	protein_coding	18.6951	-1.69185	0.643507	-2.6291	0.00856099	0.126212
chr11	93588187	93593187	ENSG00000278953.1	ENSG00000278953	+	93592187	TEC	51.7816	-1.69173	0.46689	-3.6234	0.00029076	0.0504351
chrX	112851874	112856874	ENSG00000243011.3	RN7SL266P	+	112855874	misc_RNA	7.42088	-1.69133	0.985258	-1.71664	0.0860449	0.318711
chr12	3464950	3469950	ENSG00000243507.1	ENSG00000243507	+	3468950	processed_pseudogene	15.3611	-1.69105	0.705563	-2.39674	0.0165416	0.169718
chr2	181679113	181684113	ENSG00000234595.1	ENSG00000234595	+	181683113	lncRNA	44.4977	-1.69098	0.450884	-3.75036	0.00017658	0.0400462
chrX	152710586	152715586	ENSG00000183305.14	MAGEA2B	+	152714586	protein_coding	40.7498	-1.69056	0.505747	-3.34269	0.0008297	0.0652971
chr5	164600452	164605452	ENSG00000253600.1	ENSG00000253600	-	164601452	processed_pseudogene	21.4042	-1.69046	0.623958	-2.70926	0.00674343	0.113977
chrX	135594927	135599927	ENSG00000224539.1	SAGE4P	+	135598927	unprocessed_pseudogene	34.4842	-1.68701	0.509387	-3.31184	0.00092685	0.0654051
chrX	55054838	55059838	ENSG00000234466.1	HDGFL3P1	-	55055838	processed_pseudogene	27.5042	-1.6865	0.58101	-2.9027	0.00369964	0.0895357
chr14	68113144	68118144	ENSG00000274666.1	ENSG00000274666	-	68114144	unprocessed_pseudogene	19.7251	-1.68617	0.654394	-2.57668	0.00997539	0.134867
chrX	153330147	153335147	ENSG00000063587.15	ZNF275	+	153334147	protein_coding	16.3482	-1.6859	0.643551	-2.61969	0.00880104	0.127733
chr3	37448115	37453115	ENSG00000144668.12	ITGA9	+	37452115	protein_coding	24.2848	-1.68555	0.639808	-2.63447	0.00842692	0.125424
chrX	95062226	95067226	ENSG00000221187.1	MIR548M	-	95063226	miRNA	22.2522	-1.68426	0.626213	-2.6896	0.00715381	0.116967
chrX	13592236	13597236	ENSG00000199622.1	RN7SKP20	+	13596236	misc_RNA	19.5867	-1.68297	0.560227	-3.00409	0.00266376	0.0799993
chr8	97354265	97359265	ENSG00000207215.2	SNORD3H	+	97358265	snoRNA	31.3618	-1.68296	0.585005	-2.87683	0.00401687	0.0916056
chr4	121760585	121765585	ENSG00000226757.2	PP12613	+	121764585	lncRNA	28.2996	-1.68211	0.516616	-3.25601	0.00112989	0.0680331
chr4	93824753	93829753	ENSG00000172238.6	ATOH1	+	93828753	protein_coding	17.9269	-1.68113	0.715845	-2.34845	0.0188516	0.179326
chr11	14971351	14976351	ENSG00000110680.13	CALCA	-	14972351	protein_coding	29.7433	-1.67867	0.494043	-3.39783	0.00067923	0.0633037
chr1	6446006	6451006	ENSG00000231868.1	ENSG00000231868	-	6447006	lncRNA	50.8186	-1.67531	0.436116	-3.84143	0.00012232	0.032363
chrX	149594314	149599314	ENSG00000268738.3	HSFX2	-	149595314	protein_coding	40.9186	-1.67501	0.42273	-3.96236	7.42e-05	0.0241715
chr2	215529133	215534133	ENSG00000237525.7	ENSG00000237525	+	215533133	lncRNA	35.7135	-1.67416	0.465369	-3.59749	0.0003213	0.0525418
chrX	120972668	120977668	ENSG00000270646.1	ENSG00000270646	+	120976668	processed_pseudogene	4.67188	-1.67355	1.12587	-1.48645	0.137159	0.383547
chr14	95865486	95870486	ENSG00000258516.2	ENSG00000258516	-	95866486	lncRNA	82.5618	-1.67176	0.43193	-3.87045	0.00010864	0.0300997
chrX	138393351	138398351	ENSG00000252163.1	RN7SKP31	+	138397351	misc_RNA	19.1174	-1.6716	0.66174	-2.52607	0.0115345	0.145087
chr7	116550969	116555969	ENSG00000235427.1	ENSG00000235427	-	116551969	lncRNA	46.224	-1.67152	0.427815	-3.90712	9.34e-05	0.0274964
chr4	69638642	69643642	ENSG00000271271.6	UGT2A2	-	69639642	protein_coding	28.0129	-1.67136	0.604998	-2.76258	0.00573458	0.106158
chr5	164205631	164210631	ENSG00000253538.1	ENSG00000253538	+	164209631	lncRNA	36.7038	-1.67127	0.572772	-2.91787	0.00352431	0.087831
chr3	104059039	104064039	ENSG00000214405.3	RAP1BP2	+	104063039	processed_pseudogene	22.6459	-1.67009	0.560309	-2.98066	0.0028763	0.0817271
chr7	85635344	85640344	ENSG00000227785.1	ENSG00000227785	-	85636344	processed_pseudogene	38.3872	-1.66738	0.487847	-3.41783	0.00063122	0.0618127
chr1	221741089	221746089	ENSG00000143507.18	DUSP10	-	221742089	protein_coding	15.1926	-1.66641	0.808367	-2.06146	0.0392596	0.236632
chrX	119216782	119221782	ENSG00000230170.1	HNRNPA1P28	+	119220782	processed_pseudogene	20.1493	-1.66533	0.595358	-2.79719	0.00515487	0.100919
chrX	108735563	108740563	ENSG00000133124.12	IRS4	-	108736563	protein_coding	47.6066	-1.66524	0.52285	-3.18494	0.00144785	0.0697008
chrX	11147769	11152769	ENSG00000278218.1	ENSG00000278218	-	11148769	misc_RNA	30.8214	-1.66511	0.605051	-2.75202	0.00592287	0.107521
chr5	22208476	22213476	ENSG00000287471.1	ENSG00000287471	+	22212476	lncRNA	38.1837	-1.66474	0.469136	-3.54853	0.00038738	0.0548582
chr3	194823890	194828890	ENSG00000238031.1	ENSG00000238031	+	194827890	lncRNA	21.3861	-1.66224	0.667633	-2.48975	0.0127833	0.151931
chrX	46908276	46913276	ENSG00000102221.14	JADE3	+	46912276	protein_coding	27.2056	-1.66153	0.569309	-2.91851	0.00351707	0.087722
chrX	125327021	125332021	ENSG00000213489.3	FBLIM1P1	-	125328021	processed_pseudogene	7.13426	-1.66024	1.04522	-1.58841	0.112194	0.354613
chr5	164466879	164471879	ENSG00000253236.2	LINC02143	-	164467879	lncRNA	33.6104	-1.6601	0.669614	-2.47918	0.0131684	0.153869
chr11	101871562	101876562	ENSG00000137672.13	TRPC6	-	101872562	protein_coding	32.6083	-1.65985	0.511145	-3.24732	0.00116497	0.0682208
chr5	17440010	17445010	ENSG00000249662.6	LINC02218	+	17444010	protein_coding	35.2811	-1.6591	0.493433	-3.36235	0.00077283	0.0652971
chr4	69177660	69182660	ENSG00000196472.4	ENSG00000196472	+	69181660	transcribed_unprocessed_pseudogene	21.3994	-1.65887	0.639103	-2.59562	0.00944208	0.13173
chr4	185955652	185960652	ENSG00000154556.20	SORBS2	-	185956652	protein_coding	42.8536	-1.65555	0.454518	-3.64244	0.00027007	0.0486373
chr11	22491073	22496073	ENSG00000255323.6	LINC01495	-	22492073	lncRNA	16.425	-1.65554	0.744268	-2.22438	0.0261227	0.203339
chr1	111988668	111993668	ENSG00000171385.10	KCND3	-	111989668	protein_coding	31.5784	-1.65523	0.477889	-3.46363	0.00053295	0.0579941
chr12	58780747	58785747	ENSG00000257259.3	LINC02388	-	58781747	lncRNA	32.0684	-1.6551	0.47544	-3.4812	0.00049918	0.0576084
chrX	23330849	23335849	ENSG00000165186.12	PTCHD1	+	23334849	protein_coding	86.8133	-1.65451	0.398399	-4.15291	3.28e-05	0.0141556
chr11	3317862	3322862	ENSG00000232390.3	NDUFA5P1	+	3321862	processed_pseudogene	28.5528	-1.65444	0.527007	-3.13932	0.0016934	0.0704922
chr3	131803604	131808604	ENSG00000289118.1	ENSG00000289118	-	131804604	lncRNA	39.6663	-1.65348	0.473815	-3.48971	0.00048354	0.0569437
chrX	91982505	91987505	ENSG00000234702.1	VDAC1P3	-	91983505	processed_pseudogene	8.21262	-1.65268	0.913414	-1.80934	0.0703977	0.295294
chr2	212425360	212430360	ENSG00000221782.1	MIR548F2	-	212426360	miRNA	24.9541	-1.6525	0.693027	-2.38446	0.017104	0.172079
chr13	91088593	91093593	ENSG00000234625.1	LINC00380	-	91089593	lncRNA	26.6444	-1.65164	0.670015	-2.46509	0.013698	0.156631
chr4	36502043	36507043	ENSG00000251588.2	ENSG00000251588	+	36506043	processed_pseudogene	25.9324	-1.65146	0.566409	-2.91566	0.00354931	0.0879338
chr13	106941561	106946561	ENSG00000279157.1	ENSG00000279157	-	106942561	TEC	22.6108	-1.65071	0.55988	-2.94832	0.00319505	0.0846557
chr3	83380445	83385445	ENSG00000288004.1	ENSG00000288004	+	83384445	lncRNA	15.3726	-1.6504	0.891692	-1.85086	0.0641893	0.284798
chrX	73076167	73081167	ENSG00000231963.1	ENSG00000231963	+	73080167	lncRNA	39.048	-1.64978	0.457968	-3.60238	0.00031531	0.0521594
chrX	22028325	22033325	ENSG00000102174.10	PHEX	+	22032325	protein_coding	12.4282	-1.64954	0.716149	-2.30334	0.0212595	0.188066
chrX	112685915	112690915	ENSG00000213652.3	HMGB3P30	+	112689915	processed_pseudogene	27.6321	-1.64907	0.514566	-3.20478	0.00135166	0.0692495
chr7	286170	291170	ENSG00000248767.2	FOXL3	+	290170	protein_coding	33.6906	-1.64712	0.478632	-3.44131	0.00057891	0.0598781
chrX	154622500	154627500	ENSG00000213338.3	ATF4P1	-	154623500	processed_pseudogene	25.7942	-1.64685	0.507688	-3.24384	0.00117932	0.0682208
chrX	102121679	102126679	ENSG00000184905.9	TCEAL2	+	102125679	protein_coding	39.0444	-1.64675	0.473413	-3.47847	0.00050428	0.0576084
chr15	39577079	39582079	ENSG00000137801.11	THBS1	+	39581079	protein_coding	36.3136	-1.64359	0.533049	-3.08337	0.00204672	0.0746336
chr4	32347038	32352038	ENSG00000251329.1	LINC02353	+	32351038	lncRNA	12.721	-1.64178	0.787507	-2.08479	0.0370886	0.232055
chr2	45165616	45170616	ENSG00000286728.1	ENSG00000286728	+	45169616	lncRNA	22.8269	-1.63934	0.574904	-2.8515	0.00435135	0.0946843
chrX	73470563	73475563	ENSG00000233162.1	MORF4L1P6	+	73474563	processed_pseudogene	24.1727	-1.63808	0.591006	-2.77168	0.00557677	0.104876
chrX	131054346	131059346	ENSG00000147256.12	ARHGAP36	+	131058346	protein_coding	12.2954	-1.63756	0.822684	-1.99051	0.0465346	0.251863
chr16	33804778	33809778	ENSG00000261153.2	ENSG00000261153	+	33808778	processed_pseudogene	7.05228	-1.63729	1.17942	-1.38822	0.165069	0.414773
chrX	27175298	27180298	ENSG00000242021.2	ENSG00000242021	-	27176298	lncRNA	13.9213	-1.63596	0.851675	-1.92087	0.0547476	0.268916
chr1	108498358	108503358	ENSG00000227832.1	ST13P21	+	108502358	processed_pseudogene	93.6983	-1.63585	0.358214	-4.56668	4.96e-06	0.0033042
chr2	212925336	212930336	ENSG00000283637.1	MIR4776-2	-	212926336	miRNA	21.4785	-1.63564	0.561633	-2.9123	0.00358778	0.088388
chr6	122717814	122722814	ENSG00000287818.1	ENSG00000287818	-	122718814	lncRNA	55.8548	-1.63514	0.392424	-4.16677	3.09e-05	0.0135122
chrX	119068993	119073993	ENSG00000277535.4	ENSG00000277535	+	119072993	protein_coding	29.1856	-1.6348	0.49259	-3.31878	0.00090413	0.0652971
chr6	48213794	48218794	ENSG00000216835.3	RBMXP1	-	48214794	processed_pseudogene	32.5999	-1.63365	0.512875	-3.18528	0.00144616	0.0697008
chr2	184200372	184205372	ENSG00000286980.1	ENSG00000286980	+	184204372	lncRNA	19.0062	-1.63311	0.684414	-2.38614	0.0170261	0.171895
chr5	102295284	102300284	ENSG00000173930.9	SLCO4C1	-	102296284	protein_coding	15.054	-1.63088	0.679835	-2.39893	0.0164431	0.169444
chrX	97902644	97907644	ENSG00000237752.2	NCKAP1P1	+	97906644	processed_pseudogene	12.1391	-1.62958	0.709899	-2.29551	0.021704	0.189286
chrX	48379516	48384516	ENSG00000268009.6	SSX4	+	48383516	protein_coding	29.567	-1.62907	0.562906	-2.89403	0.00380334	0.089996
chr2	182310284	182315284	ENSG00000242121.3	RN7SL267P	+	182314284	misc_RNA	47.8694	-1.62774	0.41933	-3.88176	0.0001037	0.0292625
chrX	74398550	74403550	ENSG00000230665.3	THAP12P1	-	74399550	processed_pseudogene	35.2942	-1.62677	0.536869	-3.0301	0.0024447	0.078169
chr16	61641577	61646577	ENSG00000286653.1	ENSG00000286653	-	61642577	lncRNA	33.0666	-1.62648	0.576303	-2.82226	0.00476867	0.0981826
chr10	52310281	52315281	ENSG00000107984.10	DKK1	+	52314281	protein_coding	38.9061	-1.62628	0.488917	-3.3263	0.00088008	0.0652971
chr13	93146623	93151623	ENSG00000288001.1	ENSG00000288001	+	93150623	lncRNA	30.7361	-1.62602	0.499691	-3.25405	0.00113774	0.068143
chr11	8015520	8020520	ENSG00000255420.2	CASC23	-	8016520	lncRNA	39.5853	-1.62594	0.499978	-3.25202	0.00114587	0.068143
chrX	53318990	53323990	ENSG00000226299.2	RPSAP62	+	53322990	processed_pseudogene	37.5111	-1.62509	0.493265	-3.29456	0.00098575	0.0662455
chrX	45951333	45956333	ENSG00000224701.1	MED28P4	-	45952333	processed_pseudogene	11.3844	-1.625	0.865595	-1.87732	0.0604744	0.279039
chrX	153320767	153325767	ENSG00000225110.3	PNMA6F	-	153321767	protein_coding	53.9986	-1.62494	0.48246	-3.36803	0.00075708	0.0652971
chr10	50884675	50889675	ENSG00000148584.15	A1CF	-	50885675	protein_coding	74.3173	-1.62433	0.424751	-3.82419	0.0001312	0.0332843
chr3	156113198	156118198	ENSG00000242537.1	MRE11P1	-	156114198	processed_pseudogene	35.142	-1.62363	0.474904	-3.41886	0.00062884	0.0618127
chrX	153513642	153518642	ENSG00000067842.18	ATP2B3	+	153517642	protein_coding	51.9095	-1.62209	0.444897	-3.64599	0.00026636	0.0484479
chr13	87802808	87807808	ENSG00000223404.3	LINC00397	-	87803808	lncRNA	33.0029	-1.62197	0.524084	-3.09486	0.00196905	0.0738907
chr13	88568261	88573261	ENSG00000286422.2	ENSG00000286422	-	88569261	lncRNA	17.1618	-1.6215	0.730133	-2.22083	0.0263627	0.204256
chr8	117051818	117056818	ENSG00000253271.2	ENSG00000253271	+	117055818	processed_pseudogene	60.2523	-1.62145	0.411681	-3.93861	8.2e-05	0.0257343
chr12	85563878	85568878	ENSG00000257855.1	ENSG00000257855	+	85567878	processed_pseudogene	26.9404	-1.6213	0.534142	-3.03534	0.00240261	0.0781508
chrX	107268582	107273582	ENSG00000204053.6	MYCLP1	+	107272582	processed_pseudogene	25.3337	-1.62064	0.547188	-2.96176	0.00305882	0.0836149
chr6	47752240	47757240	ENSG00000216616.1	ENSG00000216616	-	47753240	processed_pseudogene	24.0537	-1.62003	0.518535	-3.12425	0.00178256	0.0714331
chrX	69500326	69505326	ENSG00000130054.5	NALF2	+	69504326	protein_coding	13.6193	-1.61983	0.719381	-2.2517	0.0243411	0.19783
chr3	167388796	167393796	ENSG00000241669.1	LINC01327	+	167392796	lncRNA	34.4795	-1.61951	0.47259	-3.42688	0.00061055	0.0615259
chr1	70030222	70035222	ENSG00000237919.5	LRRC7-AS1	-	70031222	lncRNA	31.2282	-1.61855	0.507729	-3.18782	0.00143352	0.0697008
chrX	153400392	153405392	ENSG00000214897.5	PNMA6E	-	153401392	protein_coding	45.0398	-1.61823	0.429897	-3.76423	0.00016706	0.0384569
chr2	25672647	25677647	ENSG00000138101.20	DTNB	-	25673647	protein_coding	18.3092	-1.61688	0.708928	-2.28073	0.0225642	0.192313
chr1	220397122	220402122	ENSG00000260505.1	ENSG00000260505	+	220401122	lncRNA	50.3587	-1.61671	0.446118	-3.62396	0.00029012	0.0504351
chr16	85977750	85982750	ENSG00000269667.2	ENSG00000269667	+	85981750	lncRNA	35.6847	-1.61488	0.457992	-3.52601	0.00042188	0.0550717
chr19	17025815	17030815	ENSG00000160111.15	CPAMD8	-	17026815	protein_coding	40.9646	-1.61469	0.459061	-3.51737	0.00043584	0.0553321
chr2	55948158	55953158	ENSG00000272180.1	ENSG00000272180	+	55952158	lncRNA	45.3407	-1.613	0.456225	-3.53555	0.00040693	0.0548994
chr11	105973931	105978931	ENSG00000252081.1	RNU6-277P	-	105974931	snRNA	39.281	-1.61244	0.432464	-3.72849	0.00019263	0.0414824
chr7	95538145	95543145	ENSG00000279525.1	ENSG00000279525	+	95542145	TEC	61.2969	-1.61236	0.49194	-3.27756	0.00104707	0.0668207
chr5	39571639	39576639	ENSG00000251515.1	CFAP53P1	-	39572639	processed_pseudogene	45.6143	-1.61231	0.409847	-3.93393	8.36e-05	0.0259752
chr14	76309066	76314066	ENSG00000258402.1	ENSG00000258402	-	76310066	lncRNA	22.1028	-1.61229	0.611541	-2.63643	0.00837828	0.12507
chr2	170817037	170822037	ENSG00000235934.2	ENSG00000235934	-	170818037	lncRNA	20.4808	-1.61188	0.610024	-2.64233	0.00823383	0.124334
chr3	55174732	55179732	ENSG00000239991.1	ENSG00000239991	-	55175732	lncRNA	44.9045	-1.61084	0.449991	-3.57972	0.00034397	0.0529101
chr18	63582989	63587989	ENSG00000197641.12	SERPINB13	+	63586989	protein_coding	34.29	-1.61011	0.466489	-3.45154	0.00055739	0.0583926
chrX	24313069	24318069	ENSG00000223611.7	SUPT20HL2	-	24314069	protein_coding	17.4841	-1.60931	0.65081	-2.47279	0.0134064	0.154961
chrX	140013268	140018268	ENSG00000233145.1	ENSG00000233145	+	140017268	lncRNA	19.1706	-1.60902	0.685382	-2.34762	0.0188938	0.179476
chr4	173695082	173700082	ENSG00000250708.3	LINC02269	+	173699082	lncRNA	24.6642	-1.60901	0.603099	-2.6679	0.00763262	0.120268
chr16	81065854	81070854	ENSG00000261838.5	ENSG00000261838	+	81069854	lncRNA	14.712	-1.6086	0.717184	-2.24293	0.0249011	0.199501
chrX	136784286	136789286	ENSG00000271339.1	ENSG00000271339	+	136788286	processed_pseudogene	17.8551	-1.60808	0.673332	-2.38824	0.0169293	0.171412
chrX	154618282	154623282	ENSG00000184033.14	CTAG1B	-	154619282	protein_coding	8.78214	-1.60738	0.836265	-1.92209	0.0545938	0.268656
chr5	17349910	17354910	ENSG00000248223.1	ENSG00000248223	+	17353910	lncRNA	44.3788	-1.60676	0.455371	-3.52846	0.00041799	0.0548994
chr1	248544756	248549756	ENSG00000224521.2	ENSG00000224521	+	248548756	lncRNA	32.3969	-1.6067	0.537795	-2.98757	0.00281205	0.0809152
chr6	134603698	134608698	ENSG00000218772.2	FAM8A6P	-	134604698	processed_pseudogene	11.4653	-1.60645	0.822625	-1.95284	0.0508389	0.261287
chrX	115065237	115070237	ENSG00000236080.2	YAP1P2	+	115069237	processed_pseudogene	20.5659	-1.60608	0.651007	-2.46707	0.0136224	0.15619
chr10	114235254	114240254	ENSG00000165816.13	VWA2	+	114239254	protein_coding	63.652	-1.60523	0.409993	-3.91526	9.03e-05	0.0272394
chrX	131220436	131225436	ENSG00000276205.1	ENSG00000276205	-	131221436	unprocessed_pseudogene	48.3825	-1.60479	0.495711	-3.23734	0.00120649	0.0682208
chrX	120310556	120315556	ENSG00000125355.16	TMEM255A	-	120311556	protein_coding	33.8315	-1.60334	0.510629	-3.13993	0.00168991	0.0704881
chr15	39163676	39168676	ENSG00000259423.3	ENSG00000259423	+	39167676	lncRNA	33.5971	-1.60308	0.51942	-3.08629	0.00202671	0.0744939
chr10	11029868	11034868	ENSG00000229206.3	ENSG00000229206	-	11030868	lncRNA	16.624	-1.60258	0.785456	-2.04032	0.0413185	0.241184
chr10	83999332	84004332	ENSG00000200789.1	RNU1-65P	+	84003332	snRNA	46.2717	-1.60253	0.46285	-3.46231	0.00053555	0.0579941
chr1	154414137	154419137	ENSG00000228264.1	PSMD8P1	-	154415137	processed_pseudogene	16.6085	-1.60166	0.758552	-2.11147	0.034732	0.226801
chrX	35915734	35920734	ENSG00000165164.14	CFAP47	+	35919734	protein_coding	12.0295	-1.59663	0.772402	-2.0671	0.0387246	0.235377
chr9	97849226	97854226	ENSG00000178919.9	FOXE1	+	97853226	protein_coding	44.1835	-1.59611	0.467264	-3.41586	0.00063581	0.0618127
chr3	102095244	102100244	ENSG00000170044.9	ZPLD1	+	102099244	protein_coding	35.7524	-1.59582	0.517953	-3.08101	0.00206301	0.0748764
chr10	52388488	52393488	ENSG00000213657.3	RPL31P44	-	52389488	processed_pseudogene	25.569	-1.59537	0.513794	-3.10507	0.00190231	0.0731016
chrX	153837251	153842251	ENSG00000184844.6	CYCSP45	+	153841251	processed_pseudogene	30.027	-1.59451	0.494128	-3.22692	0.00125132	0.0682208
chr11	10692988	10697988	ENSG00000072952.20	IRAG1	-	10693988	protein_coding	50.6181	-1.59429	0.397976	-4.006	6.18e-05	0.0217324
chrX	25874339	25879339	ENSG00000233403.1	ENSG00000233403	+	25878339	lncRNA	24.7884	-1.59356	0.725363	-2.19691	0.0280266	0.208894
chrX	12863072	12868072	ENSG00000196664.5	TLR7	+	12867072	protein_coding	39.11	-1.59274	0.459541	-3.46594	0.00052838	0.0579941
chr13	92240951	92245951	ENSG00000282865.1	ENSG00000282865	-	92241951	TEC	17.9845	-1.59228	0.64669	-2.46219	0.013809	0.157049
chr3	102754170	102759170	ENSG00000201065.1	RNU6-461P	-	102755170	snRNA	45.6815	-1.59179	0.459855	-3.46151	0.00053715	0.0579941
chr6	123385421	123390421	ENSG00000235535.9	TRDN-AS1	+	123389421	lncRNA	105.63	-1.59175	0.447316	-3.55844	0.00037306	0.0545786
chrX	48240894	48245894	ENSG00000229662.2	ENSG00000229662	+	48244894	processed_pseudogene	27.3336	-1.59139	0.490771	-3.24263	0.00118433	0.0682208
chr7	50089279	50094279	ENSG00000287521.1	ENSG00000287521	+	50093279	lncRNA	24.8335	-1.59093	0.580749	-2.73944	0.00615431	0.109153
chr5	17494826	17499826	ENSG00000250667.1	ENSG00000250667	-	17495826	processed_pseudogene	28.4341	-1.59065	0.499726	-3.18304	0.00145737	0.0697008
chr4	148553947	148558947	ENSG00000201846.1	RNA5SP166	+	148557947	rRNA_pseudogene	26.7877	-1.59064	0.520216	-3.05765	0.00223078	0.076761
chrX	100816174	100821174	ENSG00000275320.1	ENSG00000275320	-	100817174	processed_pseudogene	41.2143	-1.59043	0.60138	-2.64464	0.00817786	0.123947
chrX	23194339	23199339	ENSG00000228610.1	PDCL2P1	+	23198339	processed_pseudogene	19.7061	-1.59021	0.627508	-2.53417	0.0112713	0.143158
chr8	54453935	54458935	ENSG00000164736.6	SOX17	+	54457935	protein_coding	54.4856	-1.58971	0.390658	-4.06931	4.72e-05	0.0179336
chrX	37567569	37572569	ENSG00000147036.12	LANCL3	+	37571569	protein_coding	10.7697	-1.58902	0.764591	-2.07826	0.0376857	0.233198
chr13	91130407	91135407	ENSG00000229557.1	LINC00379	-	91131407	lncRNA	58.0306	-1.58867	0.491331	-3.2334	0.00122327	0.0682208
chr9	72374	77374	ENSG00000284986.1	ENSG00000284986	-	73374	transcribed_unprocessed_pseudogene	32.3437	-1.58839	0.490755	-3.23662	0.00120956	0.0682208
chr9	29313833	29318833	ENSG00000277646.1	ENSG00000277646	+	29317833	processed_pseudogene	21.4835	-1.58563	0.530437	-2.98929	0.00279625	0.0808021
chr11	2128964	2133964	ENSG00000240801.1	ENSG00000240801	-	2129964	lncRNA	36.9745	-1.5853	0.535368	-2.96114	0.00306501	0.0836538
chr8	71791875	71796875	ENSG00000253287.1	ENSG00000253287	-	71792875	lncRNA	36.4225	-1.58511	0.508424	-3.1177	0.00182268	0.0718394
chr6	146850983	146855983	ENSG00000227748.2	ENSG00000227748	+	146854983	lncRNA	28.5518	-1.58476	0.482719	-3.283	0.0010271	0.066448
chr17	34575487	34580487	ENSG00000181291.8	TMEM132E	+	34579487	protein_coding	70.8136	-1.584	0.427962	-3.70126	0.00021453	0.0433675
chrX	46072935	46077935	ENSG00000278838.1	Metazoa_SRP	-	46073935	misc_RNA	11.7063	-1.58394	0.76249	-2.07732	0.0377721	0.233302
chr3	54118547	54123547	ENSG00000157445.15	CACNA2D3	+	54122547	protein_coding	46.5841	-1.58288	0.410729	-3.85383	0.00011629	0.0314716
chr11	8015244	8020244	ENSG00000166402.9	TUB	+	8019244	protein_coding	42.1139	-1.58276	0.498949	-3.17219	0.00151292	0.0697008
chr1	231158058	231163058	ENSG00000119283.16	TRIM67	+	231162058	protein_coding	42.964	-1.5823	0.434983	-3.63761	0.00027518	0.0492435
chrX	36439292	36444292	ENSG00000226484.2	ENSG00000226484	-	36440292	lncRNA	7.27989	-1.58128	1.09753	-1.44076	0.149654	0.396916
chr13	59229636	59234636	ENSG00000288015.1	ENSG00000288015	-	59230636	lncRNA	34.088	-1.58108	0.45102	-3.50557	0.00045564	0.0560235
chrX	155718098	155723098	ENSG00000185973.12	TMLHE	-	155719098	protein_coding	13.5065	-1.58062	0.739718	-2.13679	0.0326153	0.221456
chr2	131443587	131448587	ENSG00000217950.4	NOC2LP2	-	131444587	processed_pseudogene	20.2474	-1.58005	0.605879	-2.60786	0.0091109	0.129733
chrX	109531781	109536781	ENSG00000101888.12	NXT2	+	109535781	protein_coding	40.0147	-1.57957	0.486785	-3.2449	0.0011749	0.0682208
chr4	155381352	155386352	ENSG00000271606.1	ENSG00000271606	+	155385352	unprocessed_pseudogene	20.3993	-1.5794	0.780898	-2.02255	0.04312	0.24503
chr7	116206506	116211506	ENSG00000135269.18	TES	+	116210506	protein_coding	42.0323	-1.57923	0.451799	-3.49542	0.00047332	0.0568275
chr1	240770534	240775534	ENSG00000223963.2	THAP12P8	-	240771534	processed_pseudogene	39.1577	-1.57886	0.492296	-3.20713	0.00134066	0.0689844
chrX	120938623	120943623	ENSG00000271154.1	ENSG00000271154	+	120942623	processed_pseudogene	5.27064	-1.57804	1.23786	-1.27482	0.202373	0.454257
chrX	49911362	49916362	ENSG00000220132.1	CPSF1P2	-	49912362	processed_pseudogene	30.869	-1.57763	0.524505	-3.00785	0.00263104	0.079855
chr22	16693648	16698648	ENSG00000273244.1	ENSG00000273244	-	16694648	lncRNA	12.6904	-1.57732	0.760601	-2.07379	0.0380993	0.234051
chr7	141395517	141400517	ENSG00000285841.1	ENSG00000285841	-	141396517	lncRNA	28.2308	-1.57669	0.536518	-2.93875	0.00329543	0.0855386
chr2	133260968	133265968	ENSG00000226953.8	NCKAP5-AS2	+	133264968	lncRNA	24.0608	-1.57632	0.642292	-2.4542	0.0141197	0.158529
chr8	69447282	69452282	ENSG00000253479.6	LINC01603	-	69448282	lncRNA	16.1812	-1.57528	0.801981	-1.96424	0.0495025	0.258381
chrX	151690607	151695607	ENSG00000130032.17	PRRG3	+	151694607	protein_coding	34.8128	-1.57455	0.543703	-2.89597	0.00377991	0.0898491
chr4	38006105	38011105	ENSG00000249649.1	MRPS33P2	-	38007105	processed_pseudogene	22.7307	-1.57412	0.632526	-2.48863	0.0128237	0.152256
chrX	49632349	49637349	ENSG00000213856.3	VDAC1P2	-	49633349	processed_pseudogene	12.3994	-1.57218	0.782462	-2.00927	0.0445082	0.247776
chr6	126639488	126644488	ENSG00000217325.2	PRELID1P1	+	126643488	transcribed_processed_pseudogene	29.335	-1.57147	0.596635	-2.63389	0.00844129	0.125486
chr18	27371310	27376310	ENSG00000263611.2	ENSG00000263611	+	27375310	lncRNA	28.9964	-1.5714	0.540639	-2.90655	0.00365437	0.0890781
chrX	71072426	71077426	ENSG00000147164.12	SNX12	-	71073426	protein_coding	53.4818	-1.57059	0.507479	-3.09488	0.00196893	0.0738907
chrX	101687580	101692580	ENSG00000212584.1	RNU6-587P	+	101691580	snRNA	45.8344	-1.56816	0.429858	-3.64809	0.0002642	0.0484347
chr11	26268415	26273415	ENSG00000287227.1	ENSG00000287227	-	26269415	lncRNA	50.2641	-1.56803	0.586704	-2.67262	0.00752621	0.119669
chr13	53189667	53194667	ENSG00000279325.1	ENSG00000279325	+	53193667	lncRNA	36.5595	-1.56669	0.4369	-3.58593	0.00033587	0.0525418
chr6	102998514	103003514	ENSG00000217120.1	ENSG00000217120	+	103002514	processed_pseudogene	52.5252	-1.56666	0.468858	-3.34144	0.00083345	0.0652971
chrX	115063794	115068794	ENSG00000238223.1	ENSG00000238223	-	115064794	processed_pseudogene	25.0082	-1.56664	0.631968	-2.47898	0.0131758	0.153869
chr1	107136235	107141235	ENSG00000289612.1	ENSG00000289612	+	107140235	lncRNA	65.1371	-1.56568	0.39398	-3.97401	7.07e-05	0.0233917
chr12	49963194	49968194	ENSG00000086159.13	AQP6	+	49967194	protein_coding	21.0051	-1.56544	0.579394	-2.70185	0.00689543	0.114984
chr16	89200651	89205651	ENSG00000259803.8	SLC22A31	-	89201651	protein_coding	24.8378	-1.56514	0.581801	-2.69017	0.00714161	0.116829
chrX	49825260	49830260	ENSG00000101951.17	PAGE4	+	49829260	protein_coding	49.7722	-1.56402	0.426105	-3.67051	0.00024207	0.0458897
chr1	242768620	242773620	ENSG00000215800.2	RSL24D1P4	+	242772620	processed_pseudogene	20.5373	-1.56129	0.576185	-2.70971	0.00673431	0.113909
chr13	106659437	106664437	ENSG00000227590.2	ATP5MC1P5	+	106663437	processed_pseudogene	28.5001	-1.56057	0.632303	-2.46808	0.0135841	0.155999
chrX	145626218	145631218	ENSG00000231093.1	TRMT1P1	+	145630218	processed_pseudogene	10.9708	-1.56041	0.729523	-2.13894	0.0324405	0.221079
chrX	89917908	89922908	ENSG00000153779.11	TGIF2LX	+	89921908	protein_coding	6.54907	-1.56027	1.0982	-1.42076	0.155388	0.403594
chr3	192763	197763	ENSG00000134121.10	CHL1	+	196763	protein_coding	44.013	-1.55778	0.488278	-3.19035	0.00142103	0.0697008
chr21	7016599	7021599	ENSG00000278884.1	ENSG00000278884	+	7020599	lncRNA	10.1775	-1.55736	0.934041	-1.66734	0.0954474	0.332165
chrX	13951393	13956393	ENSG00000233535.1	ENSG00000233535	+	13955393	lncRNA	81.871	-1.55712	0.346008	-4.50025	6.79e-06	0.00419795
chr1	111985770	111990770	ENSG00000231437.3	LINC01750	+	111989770	lncRNA	32.6063	-1.55712	0.483577	-3.22	0.00128192	0.0684766
chr16	76283630	76288630	ENSG00000252814.1	RN7SKP233	+	76287630	misc_RNA	21.1001	-1.5571	0.737428	-2.11152	0.0347273	0.226801
chr8	126470189	126475189	ENSG00000253427.1	ENSG00000253427	+	126474189	lncRNA	44.6045	-1.55603	0.4503	-3.45554	0.0005492	0.0580902
chr7	375359	380359	ENSG00000249574.1	ENSG00000249574	+	379359	lncRNA	29.3616	-1.55596	0.503347	-3.09124	0.00199324	0.0739697
chr16	84855665	84860665	ENSG00000285848.1	ENSG00000285848	-	84856665	lncRNA	13.351	-1.55552	0.796586	-1.95273	0.050851	0.26129
chr21	14762259	14767259	ENSG00000232884.11	ENSG00000232884	-	14763259	lncRNA	41.5417	-1.55539	0.481071	-3.23319	0.00122417	0.0682208
chrX	126502155	126507155	ENSG00000274901.2	ENSG00000274901	-	126503155	unprocessed_pseudogene	6.5663	-1.55506	1.14868	-1.35377	0.175809	0.42547
chrX	17860337	17865337	ENSG00000131831.18	RAI2	-	17861337	protein_coding	63.6564	-1.55437	0.428075	-3.63107	0.00028225	0.0493786
chr2	49450896	49455896	ENSG00000282998.1	ENSG00000282998	-	49451896	lncRNA	27.3718	-1.55354	0.521686	-2.97793	0.00290205	0.0820792
chr4	38278880	38283880	ENSG00000287659.1	ENSG00000287659	-	38279880	lncRNA	30.1355	-1.55337	0.513609	-3.02442	0.00249113	0.0785804
chr2	153445883	153450883	ENSG00000200377.1	ENSG00000200377	-	153446883	snoRNA	26.2704	-1.55256	0.5471	-2.83781	0.00454248	0.0963107
chrX	22234358	22239358	ENSG00000233067.4	PTCHD1-AS	-	22235358	lncRNA	31.0394	-1.55218	0.553017	-2.80675	0.0050044	0.0999544
chr15	92389881	92394881	ENSG00000140557.12	ST8SIA2	+	92393881	protein_coding	57.8223	-1.55206	0.405916	-3.8236	0.00013152	0.0332843
chr3	151810073	151815073	ENSG00000114771.14	AADAC	+	151814073	protein_coding	36.6214	-1.55194	0.460211	-3.37222	0.00074564	0.0652971
chrX	130493785	130498785	ENSG00000287160.1	ENSG00000287160	+	130497785	lncRNA	31.4827	-1.55136	0.545564	-2.84358	0.00446099	0.0953899
chrX	135119526	135124526	ENSG00000224107.5	ETDB	-	135120526	protein_coding	58.9458	-1.5513	0.393089	-3.94644	7.93e-05	0.0252923
chr18	61329430	61334430	ENSG00000101542.10	CDH20	+	61333430	protein_coding	24.5095	-1.55077	0.556221	-2.78805	0.00530262	0.102598
chr18	34221930	34226930	ENSG00000278052.1	ENSG00000278052	+	34225930	lncRNA	32.6472	-1.55027	0.486927	-3.18378	0.00145366	0.0697008
chr21	15495124	15500124	ENSG00000224247.1	ENSG00000224247	-	15496124	lncRNA	52.9449	-1.55013	0.468071	-3.31175	0.00092716	0.0654051
chr9	94346563	94351563	ENSG00000282886.1	PTMAP12	-	94347563	processed_pseudogene	25.6964	-1.55009	0.523768	-2.9595	0.0030814	0.0837709
chrX	110354848	110359848	ENSG00000243978.9	RTL9	+	110358848	protein_coding	34.9108	-1.5495	0.47231	-3.2807	0.00103551	0.066448
chr7	94076157	94081157	ENSG00000236938.1	ENSG00000236938	-	94077157	lncRNA	31.7883	-1.54922	0.46404	-3.33856	0.00084215	0.0652971
chr1	219458369	219463369	ENSG00000228536.3	LYPLAL1-AS1	-	219459369	lncRNA	22.5356	-1.54821	0.60326	-2.56641	0.0102758	0.137023
chr6	99641347	99646347	ENSG00000199303.1	Y_RNA	-	99642347	misc_RNA	50.9282	-1.54775	0.406973	-3.80307	0.00014291	0.0348637
chr5	17374653	17379653	ENSG00000249199.2	ENSG00000249199	-	17375653	lncRNA	24.9185	-1.54769	0.5414	-2.85868	0.00425403	0.0938156
chr11	20665551	20670551	ENSG00000165973.19	NELL1	+	20669551	protein_coding	65.6222	-1.54727	0.523953	-2.95307	0.00314634	0.084338
chr14	45365215	45370215	ENSG00000260046.1	ENSG00000260046	+	45369215	lncRNA	29.4701	-1.54706	0.56364	-2.74477	0.0060554	0.108321
chr2	58478766	58483766	ENSG00000289529.2	ENSG00000289529	-	58479766	lncRNA	85.6076	-1.54657	0.372855	-4.14791	3.36e-05	0.0143189
chr17	21688523	21693523	ENSG00000260458.3	KCNJ18	+	21692523	protein_coding	25.6137	-1.54546	0.540161	-2.86111	0.00422158	0.0935713
chr2	96320271	96325271	ENSG00000144028.15	SNRNP200	-	96321271	protein_coding	35.9884	-1.5444	0.484528	-3.18743	0.00143545	0.0697008
chr5	100395047	100400047	ENSG00000249787.2	ENSG00000249787	+	100399047	lncRNA	14.9256	-1.5432	0.795255	-1.94051	0.0523175	0.264534
chr6	122620014	122625014	ENSG00000287258.1	ENSG00000287258	-	122621014	lncRNA	55.6484	-1.5417	0.431843	-3.57005	0.00035691	0.0534235
chr18	27594164	27599164	ENSG00000264151.6	ENSG00000264151	-	27595164	lncRNA	48.6014	-1.5397	0.442624	-3.47857	0.00050409	0.0576084
chrX	140447148	140452148	ENSG00000275268.1	U7	+	140451148	snRNA	21.0131	-1.53965	0.759077	-2.02832	0.0425273	0.243716
chr19	2863335	2868335	ENSG00000172000.7	ZNF556	+	2867335	protein_coding	18.2728	-1.53914	0.659141	-2.33506	0.0195401	0.181974
chr1	234705383	234710383	ENSG00000282097.1	ENSG00000282097	+	234709383	lncRNA	33.1372	-1.53896	0.552043	-2.78776	0.00530747	0.102617
chrX	97977641	97982641	ENSG00000234889.2	KPNB1P1	-	97978641	processed_pseudogene	17.2023	-1.53863	0.722011	-2.13103	0.0330869	0.222537
chr14	22504602	22509602	ENSG00000211856.1	TRAJ33	+	22508602	TR_J_gene	37.6637	-1.53824	0.531865	-2.89216	0.00382608	0.0900726
chr4	151794917	151799917	ENSG00000249184.2	ENSG00000249184	+	151798917	lncRNA	55.3427	-1.53787	0.421509	-3.64849	0.00026379	0.0484347
chr5	67365303	67370303	ENSG00000286647.1	ENSG00000286647	-	67366303	lncRNA	28.8359	-1.53733	0.589759	-2.60671	0.00914176	0.129907
chrX	74132114	74137114	ENSG00000230986.1	DDX3P2	-	74133114	processed_pseudogene	10.068	-1.53732	0.935488	-1.64333	0.100314	0.338636
chr3	194671463	194676463	ENSG00000041802.11	LSG1	-	194672463	protein_coding	30.4207	-1.5366	0.482128	-3.18712	0.00143699	0.0697008
chr5	67604654	67609654	ENSG00000239870.1	ENSG00000239870	+	67608654	processed_pseudogene	42.5963	-1.53656	0.412252	-3.72724	0.00019359	0.0414824
chr7	16986133	16991133	ENSG00000289189.2	ENSG00000289189	+	16990133	lncRNA	62.4049	-1.53652	0.398785	-3.85302	0.00011667	0.0314716
chr13	87673235	87678235	ENSG00000228824.8	MIR4500HG	-	87674235	lncRNA	12.1919	-1.53513	0.738306	-2.07927	0.0375928	0.23315
chrX	93670013	93675013	ENSG00000179083.7	FAM133A	+	93674013	protein_coding	4.28	-1.53496	1.18268	-1.29786	0.194335	0.445643
chrX	109481086	109486086	ENSG00000101890.5	GUCY2F	-	109482086	protein_coding	31.9698	-1.53457	0.477385	-3.21454	0.00130655	0.0685388
chrX	72807210	72812210	ENSG00000225396.6	FAM236D	-	72808210	protein_coding	38.5933	-1.53396	0.454027	-3.37856	0.00072865	0.0652293
chr4	69178100	69183100	ENSG00000250696.5	ENSG00000250696	+	69182100	lncRNA	20.1444	-1.53384	0.667224	-2.29883	0.0215144	0.188758
chr8	119415947	119420947	ENSG00000286282.1	ENSG00000286282	-	119416947	lncRNA	24.2782	-1.53377	0.56351	-2.72181	0.00649252	0.111954
chrX	15786156	15791156	ENSG00000169249.14	ZRSR2	+	15790156	protein_coding	3.48484	-1.53308	1.43732	-1.06662	0.286142	0.533924
chr7	421373	426373	ENSG00000286710.1	ENSG00000286710	+	425373	lncRNA	26.3377	-1.533	0.641731	-2.38885	0.0169013	0.171228
chr1	226492489	226497489	ENSG00000177770.11	CDKN2AIPNLP1	-	226493489	processed_pseudogene	27.4304	-1.53215	0.568544	-2.69487	0.00704155	0.116093
chr8	143429732	143434732	ENSG00000182759.4	MAFA	-	143430732	protein_coding	6.27987	-1.53205	0.973117	-1.57437	0.115402	0.358587
chr5	1883332	1888332	ENSG00000249326.1	CTD-2194D22.4	+	1887332	lncRNA	80.4388	-1.53194	0.335919	-4.56044	5.1e-06	0.0033042
chr10	36088389	36093389	ENSG00000227475.1	ENSG00000227475	-	36089389	lncRNA	29.2698	-1.53181	0.530117	-2.88956	0.00385779	0.0903465
chrX	149804214	149809214	ENSG00000224732.1	MAGEA7P	+	149808214	unprocessed_pseudogene	19.5659	-1.53115	0.678645	-2.25619	0.0240585	0.196814
chr1	107136007	107141007	ENSG00000162631.20	NTNG1	+	107140007	protein_coding	63.4265	-1.53107	0.405087	-3.77961	0.00015707	0.0369923
chr8	82159577	82164577	ENSG00000254123.2	LINC02839	-	82160577	lncRNA	27.8837	-1.53067	0.645166	-2.37252	0.0176673	0.174801
chr2	96320731	96325731	ENSG00000230747.1	ENSG00000230747	-	96321731	lncRNA	37.6874	-1.5282	0.49277	-3.10123	0.00192716	0.0734144
chrX	153127323	153132323	ENSG00000224931.4	ENSG00000224931	-	153128323	processed_pseudogene	89.3773	-1.52739	0.449253	-3.39984	0.00067426	0.0631286
chrX	104562199	104567199	ENSG00000189108.13	IL1RAPL2	+	104566199	protein_coding	44.4107	-1.52721	0.451411	-3.3832	0.00071646	0.0651859
chr7	17032478	17037478	ENSG00000232841.1	BRWD1P3	-	17033478	processed_pseudogene	34.0953	-1.52669	0.458034	-3.33313	0.00085873	0.0652971
chr5	83874821	83879821	ENSG00000250013.1	ZP3P1	-	83875821	processed_pseudogene	20.0958	-1.52542	0.656565	-2.32334	0.0201611	0.18431
chr5	17399889	17404889	ENSG00000248455.8	LINC02217	+	17403889	lncRNA	47.462	-1.52532	0.423078	-3.60529	0.00031181	0.0519546
chrX	98347748	98352748	ENSG00000271322.1	ENSG00000271322	-	98348748	processed_pseudogene	10.0805	-1.52515	0.866366	-1.7604	0.0783398	0.307353
chrX	74062083	74067083	ENSG00000203397.2	SHISA5P2	+	74066083	processed_pseudogene	17.1264	-1.52466	0.756268	-2.01604	0.043796	0.246255
chr20	11818091	11823091	ENSG00000222281.1	RN7SKP111	-	11819091	misc_RNA	53.0675	-1.52448	0.466113	-3.27062	0.00107314	0.0670618
chr18	62411678	62416678	ENSG00000241088.2	RPL17P44	+	62415678	processed_pseudogene	20.1014	-1.52444	0.631649	-2.41343	0.0158033	0.166634
chr6	57960501	57965501	ENSG00000215190.9	LINC00680	-	57961501	transcribed_unprocessed_pseudogene	31.2962	-1.52422	0.511975	-2.97714	0.00290956	0.0821383
chr6	57960382	57965382	ENSG00000283352.1	ENSG00000283352	-	57961382	lncRNA	29.488	-1.52315	0.531453	-2.86601	0.00415675	0.0930503
chrX	13081729	13086729	ENSG00000289596.1	ENSG00000289596	+	13085729	lncRNA	8.91227	-1.52286	1.08488	-1.40371	0.160405	0.408941
chr5	94784789	94789789	ENSG00000249175.1	ENSG00000249175	+	94788789	lncRNA	50.8365	-1.52269	0.436306	-3.48995	0.00048311	0.0569437
chr3	150886570	150891570	ENSG00000243273.2	ENSG00000243273	+	150890570	lncRNA	47.9185	-1.52264	0.484658	-3.14169	0.00167978	0.0703482
chr10	52313507	52318507	ENSG00000236671.9	PRKG1-AS1	-	52314507	lncRNA	39.4118	-1.52205	0.434963	-3.49927	0.00046654	0.0564568
chrX	55263916	55268916	ENSG00000204279.8	PAGE3	-	55264916	protein_coding	12.8491	-1.52134	0.728873	-2.08724	0.0368661	0.231812
chrX	151226715	151231715	ENSG00000228717.1	NAB1P1	-	151227715	processed_pseudogene	67.6879	-1.52108	0.416454	-3.65246	0.00025974	0.0482018
chr5	31743451	31748451	ENSG00000248378.1	ENSG00000248378	-	31744451	lncRNA	41.9277	-1.52091	0.484938	-3.1363	0.00171096	0.0706745
chrX	24428920	24433920	ENSG00000225071.1	RPS26P58	-	24429920	processed_pseudogene	34.7578	-1.51944	0.474358	-3.20314	0.00135937	0.0693636
chr4	151885239	151890239	ENSG00000286761.1	ENSG00000286761	-	151886239	lncRNA	37.852	-1.51937	0.442249	-3.43556	0.00059133	0.0605488
chr1	241676376	241681376	ENSG00000054277.14	OPN3	-	241677376	protein_coding	27.6499	-1.51931	0.533801	-2.84622	0.0044242	0.0952324
chr2	215754930	215759930	ENSG00000288791.1	ENSG00000288791	+	215758930	lncRNA	25.2314	-1.51895	0.595272	-2.55169	0.0107201	0.139581
chr9	87419634	87424634	ENSG00000228373.2	ENSG00000228373	+	87423634	processed_pseudogene	20.1142	-1.51849	0.683364	-2.22209	0.0262774	0.20408
chr2	176660676	176665676	ENSG00000252027.1	RNU6ATAC14P	+	176664676	snRNA	35.7485	-1.51761	0.500587	-3.03166	0.00243211	0.078169
chr7	17372326	17377326	ENSG00000199473.1	SNORA63	-	17373326	snoRNA	40.7872	-1.51733	0.54063	-2.80659	0.00500682	0.0999544
chr2	113537937	113542937	ENSG00000225398.3	PGM5P4	+	113541937	unprocessed_pseudogene	31.1062	-1.51682	0.454602	-3.3366	0.00084811	0.0652971
chrX	116747877	116752877	ENSG00000224217.1	PRPF4BP1	-	116748877	processed_pseudogene	11.3757	-1.51617	0.957993	-1.58265	0.113501	0.356174
chrX	135446368	135451368	ENSG00000273988.1	ENSG00000273988	-	135447368	unprocessed_pseudogene	8.92842	-1.5153	0.949261	-1.59629	0.110423	0.352446
chr3	103539487	103544487	ENSG00000240107.1	ENSG00000240107	-	103540487	processed_pseudogene	17.4853	-1.51484	0.660954	-2.29191	0.021911	0.190082
chr9	65249826	65254826	ENSG00000204780.5	IGKV1OR9-1	-	65250826	IG_V_pseudogene	40.1457	-1.51484	0.454222	-3.33502	0.00085293	0.0652971
chr1	23216502	23221502	ENSG00000179546.5	HTR1D	-	23217502	protein_coding	22.9945	-1.51442	0.545377	-2.77684	0.00548907	0.104182
chrX	153175284	153180284	ENSG00000198681.7	MAGEA1	+	153179284	protein_coding	36.5676	-1.51409	0.503206	-3.00888	0.00262212	0.0798396
chr9	68934979	68939979	ENSG00000207000.1	RNU6-820P	-	68935979	snRNA	59.2505	-1.51367	0.495826	-3.05282	0.00226698	0.0770645
chr18	59455072	59460072	ENSG00000267000.1	ENSG00000267000	+	59459072	lncRNA	60.2589	-1.51297	0.401371	-3.76949	0.00016358	0.0379406
chrX	153221649	153226649	ENSG00000273877.4	ENSG00000273877	+	153225649	lncRNA	17.6354	-1.51295	0.637368	-2.37375	0.0176086	0.174556
chr7	65643823	65648823	ENSG00000273024.6	INTS4P2	+	65647823	transcribed_unprocessed_pseudogene	24.5646	-1.51294	0.559185	-2.70562	0.00681764	0.114341
chrX	110632841	110637841	ENSG00000228042.2	M6PRP1	+	110636841	processed_pseudogene	29.9632	-1.51292	0.515159	-2.9368	0.0033162	0.0858595
chr12	21755980	21760980	ENSG00000255644.1	ENSG00000255644	+	21759980	lncRNA	49.4853	-1.511	0.425913	-3.54768	0.00038864	0.0548582
chr13	46486930	46491930	ENSG00000205105.6	COX17P1	+	46490930	processed_pseudogene	31.1167	-1.51087	0.487628	-3.09841	0.00194561	0.0736303
chrX	96191477	96196477	ENSG00000232069.1	RPS29P28	+	96195477	processed_pseudogene	22.5147	-1.51069	0.624143	-2.42043	0.0155022	0.16523
chrX	118142063	118147063	ENSG00000234524.1	RPL12P43	+	118146063	processed_pseudogene	20.9217	-1.51056	0.623955	-2.42094	0.0154803	0.165161
chr4	142846432	142851432	ENSG00000109452.13	INPP4B	-	142847432	protein_coding	88.7811	-1.51009	0.395108	-3.82198	0.00013238	0.0332843
chr21	16872691	16877691	ENSG00000232886.1	ENSG00000232886	-	16873691	lncRNA	23.566	-1.51002	0.589766	-2.56036	0.0104563	0.138133
chr5	34042213	34047213	ENSG00000082196.21	C1QTNF3	-	34043213	protein_coding	22.6149	-1.50997	0.536772	-2.81305	0.00490733	0.0994364
chr5	80331541	80336541	ENSG00000227087.4	RBMX2P5	-	80332541	processed_pseudogene	30.617	-1.50972	0.550976	-2.74008	0.00614234	0.109112
chr16	61914321	61919321	ENSG00000260115.1	CDH8-AS1	+	61918321	lncRNA	27.2128	-1.50911	0.531911	-2.83715	0.00455187	0.0963763
chr14	22505341	22510341	ENSG00000211857.1	TRAJ32	+	22509341	TR_J_gene	38.2804	-1.50811	0.5598	-2.69402	0.00705966	0.116203
chr16	1206124	1211124	ENSG00000261294.1	ENSG00000261294	-	1207124	lncRNA	45.7186	-1.50793	0.447829	-3.36719	0.00075937	0.0652971
chr6	62285225	62290225	ENSG00000112232.10	KHDRBS2	-	62286225	protein_coding	30.9757	-1.50724	0.520068	-2.89816	0.00375356	0.0898491
chr8	111235203	111240203	ENSG00000253103.2	LINC01609	-	111236203	lncRNA	33.2308	-1.50701	0.567199	-2.65694	0.00788533	0.122182
chrX	139964521	139969521	ENSG00000203933.3	CXorf66	-	139965521	protein_coding	6.51224	-1.50669	1.00735	-1.49569	0.134734	0.380992
chrX	111411429	111416429	ENSG00000077279.20	DCX	-	111412429	protein_coding	57.9239	-1.50615	0.48214	-3.1239	0.00178474	0.0714737
chr2	110069042	110074042	ENSG00000265682.1	MIR4267	-	110070042	miRNA	29.5813	-1.50604	0.49426	-3.04706	0.00231092	0.0776447
chr3	139931185	139936185	ENSG00000158258.16	CLSTN2	+	139935185	protein_coding	33.3841	-1.50565	0.468089	-3.21659	0.00129724	0.0684766
chr18	926993	931993	ENSG00000259837.1	LINC01904	-	927993	lncRNA	46.0261	-1.50554	0.419748	-3.58677	0.0003348	0.0525418
chr4	76897144	76902144	ENSG00000186212.4	SOWAHB	-	76898144	protein_coding	51.7245	-1.5048	0.382744	-3.93162	8.44e-05	0.0259871
chr11	101580295	101585295	ENSG00000254506.1	ENSG00000254506	+	101584295	transcribed_processed_pseudogene	28.2824	-1.50438	0.542263	-2.77425	0.00553287	0.104435
chrX	52706178	52711178	ENSG00000241476.9	SSX2	-	52707178	protein_coding	17.0716	-1.50301	0.676547	-2.22159	0.0263114	0.204129
chrX	80925500	80930500	ENSG00000073905.8	VDAC1P1	+	80929500	processed_pseudogene	12.6488	-1.50191	0.770838	-1.94842	0.0513653	0.262478
chrX	114585620	114590620	ENSG00000224664.2	RPL36AP53	+	114589620	processed_pseudogene	13.1578	-1.50165	0.878722	-1.70891	0.0874684	0.320783
chr3	148861296	148866296	ENSG00000163751.4	CPA3	+	148865296	protein_coding	40.2207	-1.50073	0.483159	-3.10608	0.00189585	0.0729645
chrX	69484652	69489652	ENSG00000231706.2	CYCSP43	-	69485652	processed_pseudogene	52.5705	-1.50033	0.444518	-3.37519	0.00073764	0.0652971
chrX	52653900	52658900	ENSG00000187754.9	SSX7	-	52654900	protein_coding	20.3115	-1.50029	0.645894	-2.32281	0.0201895	0.184423
chr17	35964472	35969472	ENSG00000273736.1	ENSG00000273736	-	35965472	transcribed_unprocessed_pseudogene	32.8279	-1.49904	0.508702	-2.94679	0.00321089	0.0849109
chr6	122639388	122644388	ENSG00000272472.1	ENSG00000272472	+	122643388	lncRNA	22.6947	-1.49898	0.705397	-2.12501	0.0335854	0.223914
chrX	1299375	1304375	ENSG00000223274.6	RNA5SP498	-	1300375	rRNA_pseudogene	10.0395	-1.49867	0.860149	-1.74234	0.0814492	0.312007
chrX	92675954	92680954	ENSG00000225912.1	RPL26P36	-	92676954	processed_pseudogene	11.3922	-1.49821	0.733935	-2.04134	0.0412171	0.240986
chr15	96167575	96172575	ENSG00000259359.2	ENSG00000259359	+	96171575	lncRNA	22.4446	-1.49789	0.748167	-2.00208	0.0452766	0.24918
chr17	81024503	81029503	ENSG00000262098.1	ENSG00000262098	-	81025503	lncRNA	28.5937	-1.49713	0.465564	-3.21573	0.00130114	0.0685388
chr4	141277789	141282789	ENSG00000248747.1	ENSG00000248747	-	141278789	lncRNA	31.0367	-1.49699	0.49099	-3.04892	0.00229669	0.0773547
chrX	48193221	48198221	ENSG00000234780.1	ENSG00000234780	+	48197221	processed_pseudogene	10.1032	-1.4961	0.892195	-1.67687	0.0935675	0.328985
chr18	10450635	10455635	ENSG00000154856.13	APCDD1	+	10454635	protein_coding	30.7987	-1.49554	0.494233	-3.02598	0.0024783	0.0784651
chr14	22477697	22482697	ENSG00000250688.1	TRAJ55	+	22481697	TR_J_pseudogene	25.8	-1.4952	0.635363	-2.3533	0.0186076	0.178352
chr8	64570332	64575332	ENSG00000253800.1	ENSG00000253800	-	64571332	processed_pseudogene	46.3951	-1.49337	0.449989	-3.31867	0.00090448	0.0652971
chr13	88567654	88572654	ENSG00000283130.1	ENSG00000283130	+	88571654	processed_pseudogene	16.7626	-1.49294	0.74255	-2.01056	0.0443716	0.247411
chr3	123448090	123453090	ENSG00000173175.16	ADCY5	-	123449090	protein_coding	23.5145	-1.49257	0.578559	-2.57981	0.00988544	0.134303
chr8	68524906	68529906	ENSG00000236191.3	RPS15AP25	-	68525906	processed_pseudogene	47.3449	-1.49255	0.469132	-3.18152	0.00146506	0.0697008
chr2	214506196	214511196	ENSG00000224257.1	VWC2L-IT1	+	214510196	lncRNA	26.2775	-1.49221	0.510746	-2.92164	0.00348199	0.0874525
chr1	165355715	165360715	ENSG00000162761.14	LMX1A	-	165356715	protein_coding	68.8357	-1.49194	0.429624	-3.47266	0.00051532	0.057903
chr9	42972289	42977289	ENSG00000213816.3	CNN2P4	-	42973289	processed_pseudogene	30.7099	-1.4919	0.462836	-3.22339	0.00126683	0.0683441
chr16	84144192	84149192	ENSG00000103160.12	HSDL1	-	84145192	protein_coding	15.5316	-1.49154	0.75453	-1.97678	0.0480669	0.255245
chrX	52766809	52771809	ENSG00000269281.2	S100A11P8	+	52770809	processed_pseudogene	28.2262	-1.49037	0.569885	-2.61522	0.00891712	0.128323
chr2	10907934	10912934	ENSG00000162975.5	KCNF1	+	10911934	protein_coding	33.9756	-1.48978	0.501315	-2.97174	0.00296113	0.0825381
chr16	86522897	86527897	ENSG00000270020.1	ENSG00000270020	-	86523897	lncRNA	18.712	-1.48931	0.579952	-2.56799	0.010229	0.136607
chrX	153876672	153881672	ENSG00000273769.5	L1CAM-AS1	+	153880672	lncRNA	55.265	-1.48864	0.381464	-3.90242	9.52e-05	0.0275779
chrX	100150340	100155340	ENSG00000236988.2	CTDSPL2P1	-	100151340	processed_pseudogene	21.1273	-1.48839	0.601416	-2.47482	0.0133305	0.154505
chr7	100729595	100734595	ENSG00000146839.19	ZAN	+	100733595	protein_coding	37.8934	-1.48791	0.516812	-2.87902	0.00398913	0.0911641
chrX	148007215	148012215	ENSG00000201285.1	RNA5SP524	-	148008215	rRNA	18.5832	-1.48772	0.620082	-2.39923	0.0164297	0.169444
chr5	136024988	136029988	ENSG00000120708.17	TGFBI	+	136028988	protein_coding	29.0899	-1.48572	0.542561	-2.73835	0.00617492	0.10931
chrX	131592121	131597121	ENSG00000232787.2	OR7L1P	+	131596121	unprocessed_pseudogene	43.2728	-1.48549	0.473311	-3.1385	0.00169813	0.0706069
chr14	28829204	28834204	ENSG00000257748.2	LINC02281	-	28830204	lncRNA	22.0844	-1.48445	0.567597	-2.61532	0.00891428	0.128323
chr10	114817744	114822744	ENSG00000151553.15	FHIP2A	+	114821744	protein_coding	34.9573	-1.48309	0.476425	-3.11295	0.00185228	0.0722872
chr4	98657611	98662611	ENSG00000168785.8	TSPAN5	-	98658611	protein_coding	73.5979	-1.48293	0.416989	-3.55628	0.00037615	0.0545786
chrX	119891837	119896837	ENSG00000186471.13	AKAP14	+	119895837	protein_coding	23.3541	-1.48215	0.569601	-2.60209	0.00926586	0.13082
chr6	19838080	19843080	ENSG00000228412.9	LNC-LBCS	-	19839080	lncRNA	72.5212	-1.48204	0.43464	-3.40981	0.00065007	0.0626853
chr3	140507789	140512789	ENSG00000250433.1	CLSTN2-AS1	-	140508789	lncRNA	64.7708	-1.48183	0.41945	-3.53279	0.0004112	0.0548994
chr6	55323469	55328469	ENSG00000187871.2	GFRAL	+	55327469	protein_coding	42.9728	-1.48182	0.458226	-3.23381	0.00122151	0.0682208
chr16	87211915	87216915	ENSG00000261651.1	ENSG00000261651	+	87215915	lncRNA	12.8228	-1.48075	0.716548	-2.0665	0.038781	0.235462
chr4	68178292	68183292	ENSG00000250426.2	FTLP10	+	68182292	transcribed_processed_pseudogene	38.1379	-1.48063	0.463095	-3.19725	0.00138745	0.0696934
chr5	39516398	39521398	ENSG00000271334.6	LINC02104	+	39520398	lncRNA	25.5259	-1.48048	0.544312	-2.71992	0.00652983	0.112124
chr11	2991377	2996377	ENSG00000205531.13	NAP1L4	-	2992377	protein_coding	5.31097	-1.48044	1.09141	-1.35644	0.174958	0.424564
chr4	185914140	185919140	ENSG00000235149.1	ENSG00000235149	+	185918140	lncRNA	36.0245	-1.47918	0.491831	-3.00749	0.00263418	0.079855
chrX	71965074	71970074	ENSG00000201392.1	RNU6-1078P	-	71966074	snRNA	23.3673	-1.47858	0.605962	-2.44006	0.014685	0.161387
chr11	20670297	20675297	ENSG00000254906.1	ENSG00000254906	-	20671297	lncRNA	42.4731	-1.47826	0.554675	-2.66509	0.00769687	0.120679
chr5	86305149	86310149	ENSG00000280009.1	ENSG00000280009	-	86306149	TEC	46.623	-1.47795	0.467119	-3.16398	0.00155629	0.0697368
chr7	108455717	108460717	ENSG00000091129.22	NRCAM	-	108456717	protein_coding	83.8934	-1.47731	0.374849	-3.94109	8.11e-05	0.0256018
chr3	111570054	111575054	ENSG00000240787.1	ENSG00000240787	-	111571054	processed_pseudogene	34.5635	-1.47637	0.482321	-3.06098	0.00220615	0.0766235
chr6	133885113	133890113	ENSG00000118526.7	TCF21	+	133889113	protein_coding	54.0224	-1.47589	0.466216	-3.16568	0.00154721	0.0697368
chrX	73213851	73218851	ENSG00000186462.9	NAP1L2	-	73214851	protein_coding	26.2605	-1.4756	0.52687	-2.80069	0.00509933	0.100723
chrX	21368801	21373801	ENSG00000149970.16	CNKSR2	+	21372801	protein_coding	52.2337	-1.47521	0.435206	-3.38968	0.00069975	0.0642381
chrX	33338609	33343609	ENSG00000198947.18	DMD	-	33339609	protein_coding	11.1639	-1.47394	0.847311	-1.73954	0.0819392	0.312721
chrX	119256667	119261667	ENSG00000214992.6	AKAP17BP	-	119257667	unprocessed_pseudogene	61.7737	-1.47366	0.396903	-3.7129	0.0002049	0.0425298
chrX	74472953	74477953	ENSG00000231206.2	HNRNPA1P25	-	74473953	processed_pseudogene	32.0219	-1.47362	0.492606	-2.99149	0.00277619	0.0804458
chr11	22337245	22342245	ENSG00000254768.6	SLC17A6-DT	-	22338245	lncRNA	82.802	-1.47338	0.394893	-3.73109	0.00019066	0.0414824
chr21	45970489	45975489	ENSG00000274248.1	ENSG00000274248	+	45974489	lncRNA	3.5891	-1.47338	1.361	-1.08257	0.278999	0.527535
chr12	30295707	30300707	ENSG00000257756.6	LINC02386	-	30296707	lncRNA	24.2991	-1.47319	0.605915	-2.43135	0.0150428	0.163258
chr3	196341	201341	ENSG00000224318.6	CHL1-AS2	-	197341	lncRNA	44.8493	-1.47262	0.51161	-2.87841	0.00399691	0.0912523
chrX	74341860	74346860	ENSG00000226515.1	ENSG00000226515	-	74342860	processed_pseudogene	14.22	-1.47228	0.760444	-1.93608	0.0528573	0.265468
chr16	1252059	1257059	ENSG00000095917.14	TPSD1	+	1256059	protein_coding	50.0938	-1.47211	0.400992	-3.67117	0.00024145	0.0458897
chr6	156504011	156509011	ENSG00000227360.2	ENSG00000227360	-	156505011	lncRNA	37.326	-1.47138	0.486676	-3.02332	0.00250019	0.0786631
chrX	116399953	116404953	ENSG00000207033.1	RNU6-154P	-	116400953	snRNA	25.7161	-1.47131	0.598262	-2.45931	0.0139206	0.157849
chrX	34383722	34388722	ENSG00000236072.1	SRSF2P1	+	34387722	processed_pseudogene	9.55792	-1.47119	0.910076	-1.61655	0.105975	0.345824
chr17	28444563	28449563	ENSG00000263870.1	ENSG00000263870	-	28445563	unprocessed_pseudogene	47.0864	-1.47106	0.463504	-3.17378	0.00150468	0.0697008
chr14	99960529	99965529	ENSG00000271198.1	VDAC3P1	+	99964529	processed_pseudogene	22.6011	-1.47069	0.578132	-2.54386	0.0109635	0.141165
chr2	131177946	131182946	ENSG00000230450.1	NEK2P4	-	131178946	processed_pseudogene	18.2191	-1.47044	0.684535	-2.14808	0.0317074	0.218909
chrX	101593510	101598510	ENSG00000204072.3	ARMCX7P	+	101597510	transcribed_unprocessed_pseudogene	52.4426	-1.46918	0.441781	-3.3256	0.0008823	0.0652971
chr4	37240743	37245743	ENSG00000174145.8	NWD2	+	37244743	protein_coding	17.2813	-1.46865	0.691373	-2.12426	0.0336488	0.224022
chr11	22488087	22493087	ENSG00000255357.2	ENSG00000255357	+	22492087	lncRNA	18.4197	-1.46817	0.63478	-2.31289	0.0207288	0.186191
chrX	17929349	17934349	ENSG00000225066.1	MDM4P1	+	17933349	processed_pseudogene	43.6554	-1.46787	0.448911	-3.26986	0.00107602	0.0670947
chr2	188970373	188975373	ENSG00000168542.16	COL3A1	+	188974373	protein_coding	16.4161	-1.46739	0.704681	-2.08235	0.0373106	0.232485
chrX	71715142	71720142	ENSG00000226870.2	ENSG00000226870	+	71719142	transcribed_unprocessed_pseudogene	38.3431	-1.46725	0.482127	-3.04328	0.00234016	0.0780336
chr14	104654787	104659787	ENSG00000258736.1	ENSG00000258736	-	104655787	lncRNA	55.9964	-1.46617	0.395603	-3.70618	0.00021041	0.0432627
chr3	106690320	106695320	ENSG00000288557.1	ENSG00000288557	-	106691320	lncRNA	20.5893	-1.46611	0.621218	-2.36005	0.0182724	0.176867
chr14	23372773	23377773	ENSG00000166091.21	CMTM5	+	23376773	protein_coding	43.5437	-1.46579	0.402056	-3.64572	0.00026664	0.0484479
chrX	53320562	53325562	ENSG00000207408.1	Y_RNA	+	53324562	misc_RNA	49.9874	-1.46524	0.493071	-2.97166	0.00296193	0.0825381
chr14	45273477	45278477	ENSG00000199739.1	RNU6-552P	-	45274477	snRNA	20.808	-1.46515	0.607378	-2.41225	0.0158543	0.166889
chr6	150139044	150144044	ENSG00000198729.5	PPP1R14C	+	150143044	protein_coding	57.7637	-1.46506	0.420729	-3.48219	0.00049734	0.0576084
chr12	49961924	49966924	ENSG00000257588.1	AQP5-AS1	-	49962924	lncRNA	23.2332	-1.46464	0.530423	-2.76128	0.00575757	0.106272
chr5	17586523	17591523	ENSG00000250088.1	ENSG00000250088	-	17587523	processed_pseudogene	115.069	-1.46346	0.321528	-4.55158	5.32e-06	0.00339607
chrX	73001856	73006856	ENSG00000226725.2	PABPC1L2B-AS1	-	73002856	lncRNA	25.2579	-1.46311	0.610075	-2.39825	0.0164735	0.169461
chrX	48208791	48213791	ENSG00000204368.6	ENSG00000204368	+	48212791	processed_pseudogene	27.3194	-1.4627	0.533221	-2.74315	0.0060853	0.108514
chr15	95283934	95288934	ENSG00000285700.1	ENSG00000285700	+	95287934	lncRNA	23.8337	-1.4625	0.626071	-2.33599	0.0194918	0.181803
chr2	207222949	207227949	ENSG00000225916.1	ENSG00000225916	+	207226949	lncRNA	41.1787	-1.46222	0.421709	-3.46738	0.00052557	0.0579941
chr6	117903264	117908264	ENSG00000196376.11	SLC35F1	+	117907264	protein_coding	28.1805	-1.46179	0.502017	-2.91183	0.00359319	0.088388
chr21	14770301	14775301	ENSG00000225502.2	GAPDHP16	+	14774301	processed_pseudogene	39.1396	-1.46014	0.534149	-2.73358	0.0062649	0.110202
chrX	135853538	135858538	ENSG00000278085.5	CT45A8	-	135854538	protein_coding	48.8605	-1.46	0.37629	-3.87999	0.00010446	0.0293405
chr2	42044021	42049021	ENSG00000162878.13	PKDCC	+	42048021	protein_coding	20.4102	-1.45969	0.590789	-2.47075	0.0134829	0.15534
chr2	165281253	165286253	ENSG00000233204.1	MAPRE1P3	+	165285253	processed_pseudogene	29.7957	-1.45954	0.542118	-2.6923	0.00709606	0.116583
chrX	120970208	120975208	ENSG00000230594.3	CT47A4	-	120971208	protein_coding	5.8747	-1.45855	0.947351	-1.53961	0.123656	0.368758
chrX	152742817	152747817	ENSG00000231447.1	ENSG00000231447	+	152746817	lncRNA	36.7885	-1.4577	0.551002	-2.64555	0.00815579	0.123889
chr4	65669495	65674495	ENSG00000145242.14	EPHA5	-	65670495	protein_coding	60.4974	-1.4576	0.475327	-3.06652	0.00216565	0.0758621
chr16	83930223	83935223	ENSG00000260932.1	ENSG00000260932	-	83931223	lncRNA	6.8078	-1.45758	1.14943	-1.26809	0.204766	0.456865
chr9	27194287	27199287	ENSG00000223162.1	RNA5SP280	+	27198287	rRNA_pseudogene	30.9746	-1.45704	0.534853	-2.72419	0.00644586	0.111727
chrX	152633895	152638895	ENSG00000268089.3	GABRQ	+	152637895	protein_coding	27.115	-1.45555	0.516075	-2.82042	0.00479615	0.0985165
chr18	27339252	27344252	ENSG00000264790.1	ENSG00000264790	+	27343252	lncRNA	73.0894	-1.45553	0.400684	-3.63261	0.00028057	0.0493786
chrX	103518489	103523489	ENSG00000172476.4	RAB40A	-	103519489	protein_coding	41.2803	-1.45396	0.447182	-3.25137	0.0011485	0.068143
chr20	32006438	32011438	ENSG00000101331.17	CCM2L	+	32010438	protein_coding	55.3759	-1.45242	0.410871	-3.53497	0.00040782	0.0548994
chr7	93712928	93717928	ENSG00000265423.1	MIR4652	+	93716928	miRNA	28.8643	-1.45226	0.518348	-2.80172	0.00508316	0.10069
chrX	68767322	68772322	ENSG00000232267.1	ACTR3P2	+	68771322	processed_pseudogene	29.6134	-1.45145	0.513084	-2.82887	0.00467128	0.0974039
chrX	73443053	73448053	ENSG00000131264.4	CDX4	+	73447053	protein_coding	33.8788	-1.45127	0.548635	-2.64523	0.0081636	0.123909
chr3	154429190	154434190	ENSG00000174948.6	GPR149	-	154430190	protein_coding	20.8427	-1.45125	0.673524	-2.15472	0.0311839	0.217655
chrX	13306652	13311652	ENSG00000231216.1	GS1-600G8.3	+	13310652	lncRNA	7.53442	-1.45104	0.974618	-1.48883	0.136532	0.382667
chrX	53320350	53325350	ENSG00000124313.18	IQSEC2	-	53321350	protein_coding	47.1808	-1.45047	0.506227	-2.86526	0.00416667	0.0930503
chr17	76845840	76850840	ENSG00000267535.2	LINC00868	+	76849840	lncRNA	24.71	-1.45033	0.517899	-2.8004	0.00510386	0.100723
chr4	82280971	82285971	ENSG00000284516.1	VAMP9P	+	82284971	transcribed_unitary_pseudogene	45.2128	-1.45011	0.464273	-3.12341	0.00178771	0.0714784
chrY	5015076	5020076	ENSG00000252468.1	RNU2-57P	+	5019076	snRNA	2.2064	-1.44909	1.87417	-0.773189	0.439411	0.65962
chr2	176600052	176605052	ENSG00000283203.1	MIR1246	-	176601052	miRNA	48.9842	-1.44846	0.450098	-3.21809	0.00129047	0.0684766
chr5	135894841	135899841	ENSG00000145839.2	IL9	-	135895841	protein_coding	52.8678	-1.44844	0.408432	-3.54634	0.00039062	0.0548582
chr4	69525014	69530014	ENSG00000156096.14	UGT2B4	-	69526014	protein_coding	25.6083	-1.44812	0.630128	-2.29814	0.021554	0.188839
chr16	1236379	1241379	ENSG00000172236.18	TPSAB1	+	1240379	protein_coding	30.716	-1.44687	0.490778	-2.94811	0.00319722	0.0846766
chr2	131379913	131384913	ENSG00000227661.1	MTCO3P18	-	131380913	unprocessed_pseudogene	32.6887	-1.44665	0.461129	-3.1372	0.00170569	0.0706513
chrX	30238000	30243000	ENSG00000120289.12	MAGEB4	+	30242000	protein_coding	18.971	-1.44661	0.663035	-2.1818	0.0291243	0.212025
chrX	40359726	40364726	ENSG00000214045.3	IMPDH1P2	-	40360726	processed_pseudogene	12.5279	-1.44616	0.71208	-2.0309	0.0422655	0.243257
chrX	90208418	90213418	ENSG00000274022.1	ENSG00000274022	-	90209418	processed_pseudogene	8.52373	-1.44607	0.996257	-1.45151	0.146639	0.393539
chr5	17494231	17499231	ENSG00000284373.1	TAF11L2	+	17498231	protein_coding	27.5915	-1.44604	0.518491	-2.78894	0.00528802	0.10245
chr7	17298368	17303368	ENSG00000237773.8	ENSG00000237773	-	17299368	lncRNA	18.598	-1.44521	0.642485	-2.24941	0.0244864	0.198142
chr6	36621512	36626512	ENSG00000263894.1	MIR3925	-	36622512	miRNA	6.65426	-1.44448	1.01664	-1.42084	0.155363	0.403578
chr18	42114538	42119538	ENSG00000287007.1	ENSG00000287007	-	42115538	lncRNA	27.9499	-1.44383	0.501259	-2.88041	0.0039716	0.0911174
chr5	50629124	50634124	ENSG00000213956.4	ENSG00000213956	+	50633124	processed_pseudogene	25.5901	-1.44366	0.514466	-2.80613	0.00501402	0.0999544
chrX	116959049	116964049	ENSG00000213526.3	SETP8	+	116963049	processed_pseudogene	10.8808	-1.44325	0.805323	-1.79214	0.0731112	0.299281
chrX	155978325	155983325	ENSG00000228410.6	ELOCP24	-	155979325	processed_pseudogene	26.7923	-1.44242	0.503055	-2.86733	0.00413953	0.0929395
chr1	97541701	97546701	ENSG00000228057.1	SEC63P1	+	97545701	processed_pseudogene	84.6118	-1.4424	0.39854	-3.61922	0.00029549	0.0508242
chr14	104289678	104294678	ENSG00000288459.1	ENSG00000288459	+	104293678	lncRNA	16.5886	-1.4423	0.646328	-2.23153	0.0256459	0.202059
chrX	70440835	70445835	ENSG00000082458.12	DLG3	+	70444835	protein_coding	46.5968	-1.44209	0.512113	-2.81596	0.00486323	0.0989649
chrX	149764897	149769897	ENSG00000235254.3	TMEM185AP1	+	149768897	unprocessed_pseudogene	43.5197	-1.44194	0.509733	-2.82882	0.00467199	0.0974039
chr7	94018833	94023833	ENSG00000236453.5	ENSG00000236453	+	94022833	lncRNA	31.6783	-1.44159	0.474258	-3.03968	0.0023683	0.0781009
chr20	46170237	46175237	ENSG00000229957.1	ENSG00000229957	-	46171237	lncRNA	65.5047	-1.44146	0.363135	-3.9695	7.2e-05	0.0235917
chrX	155333657	155338657	ENSG00000155962.13	CLIC2	-	155334657	protein_coding	14.0643	-1.4411	0.706836	-2.0388	0.0414698	0.241473
chr1	172528349	172533349	ENSG00000094975.14	SUCO	+	172532349	protein_coding	44.6408	-1.44101	0.482587	-2.98601	0.00282639	0.081093
chrX	76423710	76428710	ENSG00000198934.5	MAGEE1	+	76427710	protein_coding	22.193	-1.44055	0.580939	-2.47968	0.0131499	0.153751
chr19	49064076	49069076	ENSG00000283663.1	ENSG00000283663	-	49065076	protein_coding	38.8697	-1.44048	0.457319	-3.14984	0.00163359	0.0703482
chr19	49064076	49069076	ENSG00000225950.9	NTF4	-	49065076	protein_coding	38.8697	-1.44048	0.457319	-3.14984	0.00163359	0.0703482
chr2	10873567	10878567	ENSG00000270488.1	ENSG00000270488	-	10874567	processed_pseudogene	43.1859	-1.43998	0.459788	-3.13183	0.00173722	0.0711076
chrX	15913548	15918548	ENSG00000226536.1	SETP15	+	15917548	processed_pseudogene	31.5395	-1.43931	0.552212	-2.60644	0.00914878	0.129946
chr1	69563922	69568922	ENSG00000033122.21	LRRC7	+	69567922	protein_coding	22.754	-1.43804	0.629633	-2.28394	0.0223753	0.191743
chrX	8866601	8871601	ENSG00000229012.1	ENSG00000229012	-	8867601	lncRNA	32.1897	-1.43801	0.590508	-2.43521	0.0148833	0.162646
chr4	174213474	174218474	ENSG00000289179.1	ENSG00000289179	-	174214474	lncRNA	31.3074	-1.43754	0.514659	-2.79319	0.00521911	0.101646
chrX	132130352	132135352	ENSG00000228819.1	AGKP2	-	132131352	processed_pseudogene	57.8251	-1.43733	0.406902	-3.53237	0.00041185	0.0548994
chr2	133567463	133572463	ENSG00000176771.18	NCKAP5	-	133568463	protein_coding	55.2917	-1.4372	0.504765	-2.84727	0.00440965	0.0951074
chr2	96321317	96326317	ENSG00000198885.10	ITPRIPL1	+	96325317	protein_coding	42.2171	-1.43712	0.478196	-3.00529	0.00265328	0.0799993
chr7	8258264	8263264	ENSG00000229970.3	ENSG00000229970	+	8262264	lncRNA	16.7852	-1.43696	0.626333	-2.29424	0.021777	0.189617
chr8	126500763	126505763	ENSG00000207138.1	RNU6-869P	+	126504763	snRNA	37.7824	-1.43678	0.425715	-3.37499	0.00073819	0.0652971
chr1	47221797	47226797	ENSG00000226252.1	ENSG00000226252	+	47225797	lncRNA	28.443	-1.43678	0.539226	-2.66452	0.00770991	0.12074
chrX	46758118	46763118	ENSG00000065923.10	SLC9A7	-	46759118	protein_coding	5.85857	-1.43661	1.28611	-1.11702	0.263985	0.513797
chr18	13215367	13220367	ENSG00000267239.1	ENSG00000267239	-	13216367	lncRNA	56.003	-1.43378	0.397195	-3.60977	0.00030647	0.051555
chr3	170725842	170730842	ENSG00000289233.1	ENSG00000289233	+	170729842	lncRNA	75.3988	-1.43305	0.484471	-2.95798	0.00309663	0.0839181
chr4	142562019	142567019	ENSG00000249806.1	ENSG00000249806	+	142566019	lncRNA	18.7272	-1.43294	0.777359	-1.84334	0.0652792	0.28631
chr5	16125114	16130114	ENSG00000250981.3	MARCHF11-AS1	+	16129114	lncRNA	53.9221	-1.43291	0.419834	-3.41303	0.00064246	0.0622454
chr5	122307354	122312354	ENSG00000064692.20	SNCAIP	+	122311354	protein_coding	39.7134	-1.43231	0.450257	-3.18109	0.00146722	0.0697008
chrX	109624172	109629172	ENSG00000176076.7	KCNE5	-	109625172	protein_coding	12.7792	-1.43229	0.742953	-1.92783	0.0538766	0.26747
chrX	151908495	151913495	ENSG00000147381.12	MAGEA4	+	151912495	protein_coding	23.9077	-1.43192	0.592835	-2.41538	0.0157188	0.166406
chrX	94776567	94781567	ENSG00000231001.2	CCNB1IP1P3	-	94777567	processed_pseudogene	9.41095	-1.43101	1.08944	-1.31353	0.189006	0.440233
chr1	159850870	159855870	ENSG00000272668.2	ENSG00000272668	+	159854870	lncRNA	28.9643	-1.43077	0.493905	-2.89685	0.00376925	0.0898491
chr4	175013016	175018016	ENSG00000249411.1	ENSG00000249411	+	175017016	processed_pseudogene	15.6409	-1.43061	0.755201	-1.89434	0.0581803	0.274776
chr4	142510446	142515446	ENSG00000251248.1	ENSG00000251248	+	142514446	lncRNA	22.0432	-1.43053	0.582254	-2.45688	0.0140149	0.158063
chr5	170140940	170145940	ENSG00000253219.1	KRT18P41	-	170141940	processed_pseudogene	23.4413	-1.43028	0.62962	-2.27165	0.0231077	0.193887
chr3	132313369	132318369	ENSG00000014257.16	ACP3	+	132317369	protein_coding	28.8717	-1.43002	0.508679	-2.81125	0.00493494	0.0996007
chr5	77945438	77950438	ENSG00000253572.2	ENSG00000253572	-	77946438	lncRNA	105.502	-1.42872	0.355978	-4.01349	5.98e-05	0.0212628
chr3	167955616	167960616	ENSG00000242036.1	ENSG00000242036	-	167956616	processed_pseudogene	44.5563	-1.42802	0.412412	-3.46262	0.00053495	0.0579941
chr6	106450828	106455828	ENSG00000200314.1	Y_RNA	+	106454828	misc_RNA	101.233	-1.42793	0.419164	-3.40662	0.00065772	0.0629278
chr12	8511726	8516726	ENSG00000246115.3	SUPT4H1P2	-	8512726	processed_pseudogene	58.2638	-1.42747	0.3971	-3.59475	0.00032471	0.0525418
chr16	88634572	88639572	ENSG00000124391.5	IL17C	+	88638572	protein_coding	15.7201	-1.4271	0.675818	-2.11166	0.0347156	0.226766
chr9	40346052	40351052	ENSG00000227069.1	CNN2P2	-	40347052	processed_pseudogene	38.8044	-1.4271	0.438352	-3.25559	0.00113156	0.0680331
chr2	131385314	131390314	ENSG00000234576.2	MTND1P26	-	131386314	unprocessed_pseudogene	47.3724	-1.42696	0.447485	-3.18884	0.00142843	0.0697008
chr16	74278415	74283415	ENSG00000261248.1	ENSG00000261248	+	74282415	lncRNA	10.2972	-1.42619	0.788534	-1.80866	0.0705046	0.295451
chrX	22431598	22436598	ENSG00000224396.1	METTL15P3	+	22435598	processed_pseudogene	16.3591	-1.42591	0.769147	-1.85389	0.0637556	0.284105
chr13	91271577	91276577	ENSG00000214178.3	PPIAP23	-	91272577	processed_pseudogene	35.4062	-1.42511	0.507406	-2.80863	0.00497532	0.0998985
chr15	96388056	96393056	ENSG00000259614.2	TUBAP12	-	96389056	processed_pseudogene	30.2569	-1.42498	0.575791	-2.47482	0.0133302	0.154505
chr1	214186773	214191773	ENSG00000283518.1	LINC02775	-	214187773	lncRNA	46.9735	-1.42482	0.478483	-2.97778	0.0029034	0.0820792
chrX	25025545	25030545	ENSG00000214111.3	PAFAH1B2P1	+	25029545	processed_pseudogene	7.57115	-1.42479	1.20306	-1.18431	0.236292	0.488848
chr14	65123542	65128542	ENSG00000222985.1	RNU2-14P	-	65124542	snRNA	24.4017	-1.42476	0.626404	-2.27451	0.0229355	0.193274
chrX	15915303	15920303	ENSG00000200566.1	RNU5F-7P	-	15916303	snRNA	22.8921	-1.42406	0.561276	-2.53719	0.0111746	0.142818
chr2	101987960	101992960	ENSG00000115590.14	IL1R2	+	101991960	protein_coding	55.4095	-1.4236	0.404225	-3.5218	0.00042862	0.0553321
chrX	52703602	52708602	ENSG00000223958.1	ENSG00000223958	+	52707602	processed_pseudogene	35.3517	-1.42328	0.519694	-2.73869	0.0061684	0.109257
chrX	120928901	120933901	ENSG00000270678.1	ENSG00000270678	+	120932901	processed_pseudogene	2.07987	-1.42215	2.03342	-0.699387	0.48431	0.694272
chr13	106649897	106654897	ENSG00000230156.3	LINC00443	+	106653897	lncRNA	24.0411	-1.42211	0.614484	-2.31432	0.0206501	0.186001
chrX	33725957	33730957	ENSG00000287700.3	ENSG00000287700	-	33726957	lncRNA	6.07009	-1.42141	1.0885	-1.30585	0.191605	0.442963
chr16	76273278	76278278	ENSG00000152910.19	CNTNAP4	+	76277278	protein_coding	19.2998	-1.4213	0.663216	-2.14304	0.0321097	0.220123
chr16	76273288	76278288	ENSG00000287694.1	ENSG00000287694	+	76277288	protein_coding	19.2445	-1.42125	0.665377	-2.136	0.0326792	0.221704
chr2	191150596	191155596	ENSG00000138378.19	STAT4	-	191151596	protein_coding	111.213	-1.42055	0.313777	-4.52727	5.98e-06	0.00373333
chr2	56184870	56189870	ENSG00000233251.8	ENSG00000233251	-	56185870	lncRNA	57.481	-1.41967	0.414347	-3.42627	0.00061192	0.0615259
chr11	7481388	7486388	ENSG00000183801.8	OLFML1	+	7485388	protein_coding	25.4865	-1.41966	0.55069	-2.57797	0.00993818	0.134605
chr16	52930813	52935813	ENSG00000260326.1	PHB1P21	+	52934813	processed_pseudogene	16.7719	-1.41939	0.681297	-2.08337	0.0372176	0.232336
chr8	86039102	86044102	ENSG00000243761.1	RPL32P4	+	86043102	processed_pseudogene	84.0436	-1.4192	0.390833	-3.63123	0.00028207	0.0493786
chr15	29610212	29615212	ENSG00000259814.1	ENSG00000259814	-	29611212	lncRNA	32.8486	-1.41908	0.489305	-2.90019	0.00372934	0.0898491
chr4	166917478	166922478	ENSG00000212373.1	RNA5SP171	-	166918478	rRNA_pseudogene	75.649	-1.41886	0.409305	-3.4665	0.00052728	0.0579941
chr11	102637078	102642078	ENSG00000281655.3	ENSG00000281655	+	102641078	lncRNA	56.7084	-1.41808	0.418607	-3.38762	0.00070503	0.0645293
chr1	207492147	207497147	ENSG00000203710.12	CR1	+	207496147	protein_coding	89.6783	-1.417	0.401296	-3.53106	0.0004139	0.0548994
chrX	37941884	37946884	ENSG00000224339.1	SC4MOP	+	37945884	processed_pseudogene	24.9774	-1.41518	0.529059	-2.67489	0.00747539	0.119335
chr2	38108902	38113902	ENSG00000138061.12	CYP1B1	-	38109902	protein_coding	29.9086	-1.41482	0.530397	-2.66747	0.00764257	0.120332
chr2	134024608	134029608	ENSG00000286697.1	ENSG00000286697	+	134028608	lncRNA	31.5653	-1.41476	0.529453	-2.67211	0.00753752	0.119755
chr21	14578202	14583202	ENSG00000223662.1	SAMSN1-AS1	+	14582202	lncRNA	45.0656	-1.41457	0.567159	-2.49412	0.0126268	0.151067
chr5	112362666	112367666	ENSG00000248350.1	ENSG00000248350	-	112363666	processed_pseudogene	25.9667	-1.41394	0.543485	-2.60162	0.00927854	0.130906
chr10	47618480	47623480	ENSG00000264404.3	LINC02675	-	47619480	lncRNA	13.5048	-1.41363	0.725736	-1.94785	0.0514326	0.26264
chr1	72279170	72284170	ENSG00000286863.2	ENSG00000286863	+	72283170	lncRNA	151.813	-1.41359	0.42188	-3.35068	0.00080613	0.0652971
chr5	101815780	101820780	ENSG00000251261.4	OR7H2P	-	101816780	unprocessed_pseudogene	25.7844	-1.41296	0.652439	-2.16565	0.0303379	0.215165
chr5	151685975	151690975	ENSG00000113140.11	SPARC	-	151686975	protein_coding	31.8491	-1.41234	0.475884	-2.96783	0.00299908	0.0829821
chr3	54124377	54129377	ENSG00000286353.1	ENSG00000286353	-	54125377	lncRNA	61.3753	-1.41192	0.471905	-2.99195	0.00277204	0.0804458
chr4	98654894	98659894	ENSG00000260641.2	TSPAN5-DT	+	98658894	lncRNA	28.5573	-1.41141	0.562058	-2.51114	0.0120341	0.147847
chrX	135584160	135589160	ENSG00000237833.1	ETS2P1	-	135585160	processed_pseudogene	8.94361	-1.41133	0.851411	-1.65764	0.0973907	0.334871
chr1	234214088	234219088	ENSG00000233332.1	ENSG00000233332	-	234215088	lncRNA	61.1993	-1.4105	0.506989	-2.78211	0.00540068	0.103494
[truncated: 60,256 more rows]
