# Supplementary material for: The PRC2.1 subcomplex opposes G1 progression through regulation of CCND1 and CCND2
Source: eLife. 2025 Feb 4;13:RP97577. doi: 10.7554/eLife.97577 (PMC11793871; doi:10.7554/eLife.97577)
Supplement: Supplementary file 4. [file elife-97577-supp4.xlsx]

## Sheet: MTF2Ko_MockRNA-Seq_DESeqResults
gene_id	baseMean	log2FoldChange	lfcSE	stat	pvalue	padj	gene_name	gene_type
ENSG00000280634.1	11.566	37.3624	5.91697	6.31446	2.71114e-10	1.15406e-08	THRIL	lncRNA
ENSG00000198406.7	6.50691	25.9	5.89298	4.39505	NA	NA	BZW1P2	processed_pseudogene
ENSG00000163873.10	253.972	10.3574	1.58665	6.52789	6.6704e-11	3.24114e-09	GRIK3	protein_coding
ENSG00000009709.12	159.019	9.92129	1.64891	6.01687	1.77822e-09	6.57487e-08	PAX7	protein_coding
ENSG00000185736.16	78.3357	9.64766	1.37812	7.00062	2.54839e-12	1.54597e-10	ADARB2	protein_coding
ENSG00000186732.14	51.6653	9.28952	2.12026	4.38131	1.17969e-05	0.000201711	MPPED1	protein_coding
ENSG00000089116.4	33.588	9.14739	1.53198	5.97096	2.3586e-09	8.50355e-08	LHX5	protein_coding
ENSG00000154342.6	93.0391	9.08968	1.49247	6.09036	1.12654e-09	4.30677e-08	WNT3A	protein_coding
ENSG00000184012.14	17.8893	8.56352	1.46654	5.83925	5.24363e-09	1.77967e-07	TMPRSS2	protein_coding
ENSG00000169618.7	24.5407	8.48557	1.33988	6.33307	2.40337e-10	1.03611e-08	PROKR1	protein_coding
ENSG00000101463.6	24.2548	8.35501	1.48813	5.61444	1.97196e-08	5.99936e-07	SYNDIG1	protein_coding
ENSG00000181234.10	14.0297	8.23987	3.61952	2.27651	0.0228156	0.109236	TMEM132C	protein_coding
ENSG00000273079.7	49.871	8.15007	1.94574	4.18868	2.80586e-05	0.00043699	GRIN2B	protein_coding
ENSG00000182463.16	52.3899	8.11456	1.58731	5.11215	3.18516e-07	7.57484e-06	TSHZ2	protein_coding
ENSG00000117069.15	17.3087	8.0986	2.32528	3.48286	0.000496095	0.00523535	ST6GALNAC5	protein_coding
ENSG00000168621.15	16.1845	8.04063	1.34117	5.99522	2.03207e-09	7.39208e-08	GDNF	protein_coding
ENSG00000130700.7	92.4421	8.00823	1.0824	7.39862	1.37606e-13	1.01388e-11	GATA5	protein_coding
ENSG00000283183	15.9298	7.92858	1.45177	5.46131	4.72643e-08	1.35073e-06	ENSG00000283183	lncRNA
ENSG00000197177.16	34.023	7.90753	1.4227	5.55811	2.72708e-08	8.06658e-07	ADGRA1	protein_coding
ENSG00000206432.4	59.5603	7.89713	1.33026	5.93652	2.91136e-09	1.03491e-07	TMEM200C	protein_coding
ENSG00000043039.7	74.9284	7.79295	1.41731	5.4984	3.83251e-08	1.11572e-06	BARX2	protein_coding
ENSG00000215695	13.8471	7.5776	5.33191	1.42118	0.155265	0.395523	RSC1A1	protein_coding
ENSG00000104321.11	15.028	7.55823	1.46316	5.16569	2.39556e-07	5.9266e-06	TRPA1	protein_coding
ENSG00000124875.10	14.9077	7.53503	1.65695	4.54753	5.42787e-06	0.000100714	CXCL6	protein_coding
ENSG00000140538	163.779	7.49934	1.01659	7.37697	1.61927e-13	1.1802e-11	NTRK3	protein_coding
ENSG00000069188.17	112.51	7.47515	1.16433	6.42012	1.36171e-10	6.09072e-09	SDK2	protein_coding
ENSG00000215644.10	21.0769	7.39086	1.35527	5.45343	4.94073e-08	1.40209e-06	GCGR	protein_coding
ENSG00000142408.7	64.9279	7.2769	1.23483	5.89303	3.79179e-09	1.32009e-07	CACNG8	protein_coding
ENSG00000215218.4	75.0403	7.17288	1.02395	7.00508	2.46843e-12	1.50196e-10	UBE2QL1	protein_coding
ENSG00000181072.12	13.809	7.13377	1.81719	3.92571	8.64726e-05	0.00117198	CHRM2	protein_coding
ENSG00000163497.3	102.523	7.10055	1.15431	6.15133	7.68338e-10	3.02881e-08	FEV	protein_coding
ENSG00000176956.13	74.6044	7.01743	1.19439	5.87533	4.22007e-09	1.44927e-07	LY6H	protein_coding
ENSG00000150551.11	37.5613	7.00693	1.29366	5.41638	6.08193e-08	1.69043e-06	LYPD1	protein_coding
ENSG00000189292.16	34.6549	6.96718	0.995813	6.99647	2.62487e-12	1.58762e-10	ALKAL2	protein_coding
ENSG00000060709	35.1868	6.95774	1.41326	4.92317	8.51534e-07	1.85418e-05	RIMBP2	protein_coding
ENSG00000122012.14	6.47566	6.94803	1.73529	4.00395	6.22946e-05	0.000889509	SV2C	protein_coding
ENSG00000257069.6	18.6904	6.9084	1.30926	5.27657	1.31624e-07	3.42798e-06	KCNK4-TEX40	lncRNA
ENSG00000166250.12	251.202	6.86416	0.649195	10.5733	3.96105e-26	1.31572e-23	CLMP	protein_coding
ENSG00000139973	43.5325	6.69133	1.22535	5.46076	4.74096e-08	1.35298e-06	SYT16	protein_coding
ENSG00000146938.16	189.111	6.61654	1.2563	5.26667	1.38921e-07	3.5949e-06	NLGN4X	protein_coding
ENSG00000169436.17	11.7122	6.57352	2.40384	2.73459	0.00624585	0.0411556	COL22A1	protein_coding
ENSG00000101134.12	34.7491	6.57078	1.37001	4.79615	1.61745e-06	3.33057e-05	DOK5	protein_coding
ENSG00000102466.16	5.88818	6.56451	2.431	2.70034	0.00692695	0.0444299	FGF14	protein_coding
ENSG00000205922.5	14.5075	6.56276	1.38088	4.7526	2.00816e-06	4.07961e-05	ONECUT3	protein_coding
ENSG00000101438.4	41.4874	6.53476	1.33495	4.89515	9.82328e-07	2.10556e-05	SLC32A1	protein_coding
ENSG00000259040.5	11.4841	6.50551	3.16848	2.05319	0.0400537	0.163332	BLOC1S5-TXNDC5	protein_coding
ENSG00000041982.16	84.9084	6.49829	1.38361	4.69661	2.64515e-06	5.23313e-05	TNC	protein_coding
ENSG00000120645.12	2.59021	6.48046	5.91122	1.0963	0.272948	NA	IQSEC3	protein_coding
ENSG00000008196.13	8.88602	6.48041	1.56373	4.1442	3.41004e-05	0.00052068	TFAP2B	protein_coding
ENSG00000165124	134.341	6.47803	0.932506	6.9469	3.73405e-12	2.22527e-10	SVEP1	protein_coding
ENSG00000171532.5	18.1926	6.45474	1.19623	5.3959	6.81824e-08	1.86188e-06	NEUROD2	protein_coding
ENSG00000120057.5	24.3984	6.43136	1.56042	4.12156	3.76316e-05	0.000567752	SFRP5	protein_coding
ENSG00000157766.19	284.218	6.42826	0.908855	7.07292	1.51711e-12	9.63623e-11	ACAN	protein_coding
ENSG00000101198.15	22.0832	6.41802	1.59702	4.01875	5.85067e-05	0.000843746	NKAIN4	protein_coding
ENSG00000225108.1	8.25591	6.3871	5.8927	1.0839	NA	NA	ZBTB45P1	processed_pseudogene
ENSG00000267512.1	11.3923	6.38582	3.6156	1.76619	0.0773645	0.25643	ENSG00000267512	lncRNA
ENSG00000222012.1	9.75284	6.32587	1.36437	4.63648	3.54392e-06	6.81648e-05	ENSG00000222012	lncRNA
ENSG00000137265	104.009	6.31989	0.67146	9.41217	4.85985e-21	9.20283e-19	IRF4	protein_coding
ENSG00000100341	14.1736	6.315	1.58479	3.98477	6.75464e-05	0.000951756	PNPLA5	protein_coding
ENSG00000130037.5	4.79	6.28661	1.63331	3.84899	0.000118607	0.00154603	KCNA5	protein_coding
ENSG00000169862	16.4189	6.2557	2.23995	2.79279	0.00522559	0.0358675	CTNND2	protein_coding
ENSG00000169181.13	8.18167	6.2543	1.72503	3.62562	0.000288264	0.00331487	GSG1L	protein_coding
ENSG00000106278.12	80.3184	6.2201	0.859932	7.23325	4.71553e-13	3.23381e-11	PTPRZ1	protein_coding
ENSG00000189108.13	4.42109	6.21743	2.40167	2.58879	0.00963132	0.0572119	IL1RAPL2	protein_coding
ENSG00000185274.12	4.52805	6.19773	5.89326	1.05166	0.292953	0.574787	GALNT17	protein_coding
ENSG00000212643.3	4.42509	6.15832	5.89322	1.04498	0.296031	0.577525	ZRSR2P1	transcribed_processed_pseudogene
ENSG00000174403	35.5177	6.15554	1.32862	4.63303	3.6035e-06	6.91422e-05	CRMA	lncRNA
ENSG00000079841	40.9429	6.13965	1.11818	5.49075	4.00237e-08	1.15851e-06	RIMS1	protein_coding
ENSG00000138669.10	22.5379	6.1245	1.51693	4.03744	5.40383e-05	0.000786584	PRKG2	protein_coding
ENSG00000261226.1	7.51176	6.10999	1.76183	3.46797	0.000524405	0.00547988	ENSG00000261226	lncRNA
ENSG00000147676.14	418.182	6.05345	1.00121	6.04612	1.48378e-09	5.58817e-08	MAL2	protein_coding
ENSG00000119715.15	183.239	6.0375	0.442084	13.6569	1.83645e-42	2.18884e-39	ESRRB	protein_coding
ENSG00000256925.3	3.37706	6.01249	1.98299	3.03203	0.00242916	NA	ADGRA1-AS1	lncRNA
ENSG00000182674.6	12.4191	6.00833	1.83077	3.28186	0.00103123	0.00961124	KCNB2	protein_coding
ENSG00000148408	66.3645	5.99374	0.889885	6.7354	1.63475e-11	8.92813e-10	CACNA1B	protein_coding
ENSG00000101204.18	78.7611	5.98551	1.50616	3.97401	7.0674e-05	0.000986903	CHRNA4	protein_coding
ENSG00000109819.9	38.4051	5.977	1.05099	5.687	1.29292e-08	4.0997e-07	PPARGC1A	protein_coding
ENSG00000130558.20	279.217	5.96667	1.24552	4.7905	1.66369e-06	3.40157e-05	OLFM1	protein_coding
ENSG00000249421.2	6.38354	5.95758	1.63339	3.64737	0.000264941	0.00308519	ADAMTS19-AS1	lncRNA
ENSG00000131620	21.5799	5.9376	1.56307	3.79868	0.000145471	0.00183991	ANO1	protein_coding
ENSG00000152578.13	14.7444	5.93599	1.55684	3.81284	0.000137382	0.00175071	GRIA4	protein_coding
ENSG00000162706.13	25.183	5.91978	1.37448	4.30691	1.65553e-05	0.000272719	CADM3	protein_coding
ENSG00000204442.4	70.7389	5.91379	0.864806	6.83829	8.01453e-12	4.5873e-10	NALF1	protein_coding
ENSG00000182450	27.3683	5.91339	1.26021	4.69239	2.70034e-06	5.31723e-05	KCNK4	protein_coding
ENSG00000251680.6	7.96981	5.90931	1.59152	3.71299	0.000204821	0.00248062	ENSG00000251680	lncRNA
ENSG00000286239.1	6.20838	5.89424	2.19801	2.68162	0.00732655	0.0463763	ENSG00000286239	protein_coding
ENSG00000115616.3	46.7108	5.87501	1.26716	4.63637	3.54584e-06	6.81648e-05	SLC9A2	protein_coding
ENSG00000174945.14	23.4993	5.87079	1.12591	5.21425	1.84564e-07	4.70394e-06	AMZ1	protein_coding
ENSG00000229205.5	2.61803	5.84532	2.11335	2.76591	0.00567641	NA	LINC00200	lncRNA
ENSG00000278977.1	8.86196	5.84516	2.13809	2.73383	0.00626025	0.0412371	ENSG00000278977	TEC
ENSG00000075388.4	8.4984	5.83613	1.65802	3.51995	0.000431634	0.00465354	FGF4	protein_coding
ENSG00000273682.1	1.64875	5.82273	3.64546	1.59725	0.110209	NA	ENSG00000273682	processed_pseudogene
ENSG00000111799.22	230.169	5.79879	0.67185	8.63108	6.07732e-18	7.79358e-16	COL12A1	protein_coding
ENSG00000164379.7	3.45746	5.79184	1.54749	3.74273	0.000182032	NA	FOXQ1	protein_coding
ENSG00000167281	301.36	5.79045	0.893033	6.48403	8.9303e-11	4.24755e-09	RBFOX3	protein_coding
ENSG00000107984.10	15.9941	5.76641	1.30675	4.41279	1.02047e-05	0.000177179	DKK1	protein_coding
ENSG00000184731.6	38.0535	5.74256	1.12372	5.11033	3.21601e-07	7.63925e-06	FAM110C	protein_coding
ENSG00000184828.10	27.257	5.72607	1.04237	5.49331	3.94478e-08	1.14348e-06	ZBTB7C	protein_coding
ENSG00000225978.3	3.81266	5.69913	1.70473	3.34313	0.000828385	NA	HAR1A	lncRNA
ENSG00000161992.6	48.5041	5.67723	0.731384	7.76231	8.33964e-15	7.31505e-13	PRR35	protein_coding
ENSG00000141668.10	7.10089	5.65122	1.59223	3.54925	0.000386329	0.00423593	CBLN2	protein_coding
ENSG00000181291.8	787.52	5.62199	0.852003	6.59855	4.1519e-11	2.0979e-09	TMEM132E	protein_coding
ENSG00000257743	4.65483	5.58785	1.52031	3.67546	0.000237419	0.00281321	MGAM2	protein_coding
ENSG00000221818.9	19.0487	5.57473	1.07402	5.19052	2.09704e-07	5.28485e-06	EBF2	protein_coding
ENSG00000022355.18	10.5355	5.56695	2.7286	2.04022	0.0413281	0.167011	GABRA1	protein_coding
ENSG00000187135	90.322	5.52865	0.82501	6.7013	2.06567e-11	1.10434e-09	VSTM2B	protein_coding
ENSG00000144057	41.62	5.51491	0.806821	6.83536	8.17974e-12	4.66867e-10	ST6GAL2	protein_coding
ENSG00000215612.8	132.178	5.47208	1.01656	5.38296	7.32696e-08	1.97419e-06	HMX1	protein_coding
ENSG00000198121	164.647	5.46546	0.890149	6.13994	8.25526e-10	3.23536e-08	LPAR1	protein_coding
ENSG00000225449.3	8.66992	5.455	1.31469	4.14928	3.33517e-05	0.000510787	RAB6C-AS1	transcribed_unprocessed_pseudogene
ENSG00000236698.1	3.71792	5.43106	2.1278	2.55243	0.0106974	NA	EIF1AXP1	processed_pseudogene
ENSG00000153976.3	98.1524	5.41163	0.992892	5.45037	5.02657e-08	1.42246e-06	HS3ST3A1	protein_coding
ENSG00000104313.20	73.3415	5.40701	0.740401	7.30281	2.81817e-13	1.98961e-11	EYA1	protein_coding
ENSG00000130226.17	8.9993	5.40095	1.3541	3.9886	6.64639e-05	0.000939115	DPP6	protein_coding
ENSG00000100678.19	7.39979	5.37246	1.78447	3.01067	0.00260671	0.0206398	SLC8A3	protein_coding
ENSG00000019186.10	7.88613	5.35509	1.79328	2.9862	0.00282466	0.0220298	CYP24A1	protein_coding
ENSG00000185737.13	9.88393	5.33915	1.9487	2.73985	0.00614677	0.0406349	NRG3	protein_coding
ENSG00000176769.9	8.97868	5.32592	1.46293	3.64059	0.000272019	0.00315311	TCERG1L	protein_coding
ENSG00000258900.1	2.2716	5.311	5.89603	0.900775	0.367708	NA	HNRNPCP1	processed_pseudogene
ENSG00000261727.2	3.58111	5.30562	4.33307	1.22445	0.220783	NA	ENSG00000261727	transcribed_processed_pseudogene
ENSG00000136574.19	14.5825	5.3028	1.38356	3.83273	0.000126729	0.00163241	GATA4	protein_coding
ENSG00000281394.1	3.32575	5.30248	2.76232	1.91957	0.0549119	NA	SCARNA4	scaRNA
ENSG00000182870.13	3.46185	5.29615	1.47997	3.57855	0.000345503	NA	GALNT9	protein_coding
ENSG00000174482	36.5127	5.29308	1.06593	4.96567	6.84631e-07	1.51939e-05	LINGO2	protein_coding
ENSG00000113389.16	369.945	5.28612	0.500976	10.5516	4.99163e-26	1.6054e-23	NPR3	protein_coding
ENSG00000154783.12	205.022	5.25974	0.922897	5.69916	1.204e-08	3.83575e-07	FGD5	protein_coding
ENSG00000235333.3	2.35558	5.25751	5.89627	0.891668	0.372571	NA	PVRIG2P	transcribed_unprocessed_pseudogene
ENSG00000273238.3	11.5156	5.25553	1.24314	4.22763	2.36164e-05	0.000373548	TMEM271	protein_coding
ENSG00000274718.1	6.43037	5.22165	1.53529	3.40109	0.000671185	0.00669928	ENSG00000274718	lncRNA
ENSG00000273275.1	6.15811	5.2182	5.89647	0.884969	0.376173	0.657036	ENSG00000273275	lncRNA
ENSG00000132975.8	39.3899	5.18697	0.94891	5.46624	4.59692e-08	1.31744e-06	GPR12	protein_coding
ENSG00000164853.9	11.9578	5.18008	1.32972	3.89563	9.79446e-05	0.00130474	UNCX	protein_coding
ENSG00000198108.4	55.8653	5.16612	0.902359	5.72513	1.03352e-08	3.30824e-07	CHSY3	protein_coding
ENSG00000106366.9	46.0686	5.16206	1.44662	3.56835	0.000359238	0.00398369	SERPINE1	protein_coding
ENSG00000281406.2	24.3761	5.15334	1.18174	4.3608	1.29585e-05	0.000219366	BLACAT1	protein_coding
ENSG00000100095.19	7.1157	5.14422	1.97551	2.604	0.00921427	0.055384	SEZ6L	protein_coding
ENSG00000189120.5	42.5436	5.12537	0.776585	6.59989	4.11467e-11	2.08428e-09	SP6	protein_coding
ENSG00000162009	7.9837	5.10912	1.42445	3.58672	0.000334861	0.00375897	SSTR5	protein_coding
ENSG00000187627.17	2.77219	5.09621	4.74	1.07515	0.282307	NA	RGPD1	protein_coding
ENSG00000187714.7	27.536	5.0888	1.32048	3.85375	0.000116323	0.00151865	SLC18A3	protein_coding
ENSG00000149654.11	23.4252	5.08138	1.18864	4.27496	1.91168e-05	0.000309876	CDH22	protein_coding
ENSG00000070193.5	5.9074	5.08044	1.8209	2.79007	0.0052696	0.0360597	FGF10	protein_coding
ENSG00000272163	2.54248	5.07438	1.62025	3.13186	0.00173704	NA	ENSG00000272163	lncRNA
ENSG00000222014.6	8.34105	5.06219	1.40837	3.59435	0.000325207	0.00366279	RAB6C	protein_coding
ENSG00000237742	3.26629	5.04068	1.93366	2.60681	0.00913902	NA	HEY2-AS1	lncRNA
ENSG00000125398.8	3.79561	5.04055	1.9912	2.53141	0.0113604	NA	SOX9	protein_coding
ENSG00000100311.17	37.0657	5.02081	0.740141	6.78359	1.1723e-11	6.50768e-10	PDGFB	protein_coding
ENSG00000161905.13	10.9599	5.01169	1.30656	3.83578	0.000125164	0.00161739	ALOX15	protein_coding
ENSG00000274588.2	14.8338	4.99333	1.6827	2.96746	0.00300275	0.0231601	DGKK	protein_coding
ENSG00000008197.5	1.96687	4.98974	3.00056	1.66294	0.0963253	NA	TFAP2D	protein_coding
ENSG00000266846.2	1.1587	4.97675	4.35614	1.14247	0.25326	NA	ENSG00000266846	lncRNA
ENSG00000095713.14	26.3601	4.95191	1.14501	4.32476	1.52698e-05	0.000254438	CRTAC1	protein_coding
ENSG00000250846.6	6.55982	4.95031	2.37498	2.08436	0.0371273	0.154693	EPHA5-AS1	lncRNA
ENSG00000151892.16	2.22967	4.941	1.87531	2.63477	0.0084195	NA	GFRA1	protein_coding
ENSG00000168546.11	22.0042	4.93511	1.32275	3.73094	0.000190764	0.00233409	GFRA2	protein_coding
ENSG00000219438.9	406.189	4.92926	0.766737	6.42887	1.28552e-10	5.78828e-09	TAFA5	protein_coding
ENSG00000170214.5	7.72807	4.91897	1.66345	2.95708	0.00310563	0.0237397	ADRA1B	protein_coding
ENSG00000101230.6	37.955	4.9172	0.978382	5.02585	5.01209e-07	1.15535e-05	ISM1	protein_coding
ENSG00000284636.1	2.00837	4.9125	2.08509	2.35602	0.0184721	NA	ENSG00000284636	unprocessed_pseudogene
ENSG00000134917.10	75.2596	4.90989	0.694368	7.07103	1.53789e-12	9.7074e-11	ADAMTS8	protein_coding
ENSG00000270659	3.54535	4.90794	1.52718	3.21373	0.00131025	NA	ENSG00000270659	lncRNA
ENSG00000266265.4	3.85583	4.90615	1.40235	3.49851	0.000467871	NA	KLF14	protein_coding
ENSG00000278950.1	4.24268	4.89256	1.48561	3.29329	0.00099022	0.00928882	ENSG00000278950	TEC
ENSG00000237058.1	3.27913	4.89073	2.07547	2.35644	0.018451	NA	MMEL1-AS1	lncRNA
ENSG00000077943.8	2.41445	4.88744	2.02879	2.40904	0.0159945	NA	ITGA8	protein_coding
ENSG00000184156.17	64.6873	4.88232	1.19883	4.07258	4.64962e-05	0.000686166	KCNQ3	protein_coding
ENSG00000113448	34.3302	4.87875	0.940916	5.18511	2.15889e-07	5.4138e-06	PDE4D	protein_coding
ENSG00000185052.13	1.59881	4.86822	2.70641	1.79877	0.0720547	NA	SLC24A3	protein_coding
ENSG00000227487.4	4.20028	4.86382	1.41529	3.43662	0.00058902	0.00603068	NCAM1-AS1	lncRNA
ENSG00000030419.17	49.9071	4.86227	0.670299	7.25387	4.05017e-13	2.80084e-11	IKZF2	protein_coding
ENSG00000078549.15	283.048	4.85729	0.62262	7.80138	6.1232e-15	5.48975e-13	ADCYAP1R1	protein_coding
ENSG00000108684.15	1.61217	4.84372	2.33179	2.07726	0.037778	NA	ASIC2	protein_coding
ENSG00000280109.3	6.82847	4.84058	1.63364	2.96306	0.00304601	0.0233958	PLAC4	lncRNA
ENSG00000182732.18	4.01915	4.83852	2.32697	2.07932	0.0375877	0.156066	RGS6	protein_coding
ENSG00000176697.20	15.3901	4.83171	1.1318	4.26905	1.96309e-05	0.000316185	BDNF	protein_coding
ENSG00000130477.16	139.624	4.83112	0.532114	9.07911	1.0947e-19	1.73287e-17	UNC13A	protein_coding
ENSG00000287043.1	1.73526	4.8239	2.08824	2.31003	0.0208863	NA	ENSG00000287043	lncRNA
ENSG00000287243.2	3.26587	4.82104	1.83526	2.6269	0.0086167	NA	THCAT155	lncRNA
ENSG00000204291.11	24.8914	4.8171	0.851633	5.65631	1.54663e-08	4.81379e-07	COL15A1	protein_coding
ENSG00000181378.14	1.91702	4.81566	2.23742	2.15233	0.0313712	NA	CFAP65	protein_coding
ENSG00000182240.16	281.009	4.80652	1.16109	4.13965	3.47839e-05	0.000530317	BACE2	protein_coding
ENSG00000169218.14	23.2889	4.80347	1.10525	4.34606	1.38607e-05	0.00023326	RSPO1	protein_coding
ENSG00000198732.11	12.875	4.80052	1.2955	3.70553	0.000210948	0.0025457	SMOC1	protein_coding
ENSG00000270066.3	10.6536	4.78016	2.5496	1.87487	0.0608108	0.218544	ENSG00000270066	lncRNA
ENSG00000264515	3.25796	4.75876	1.69974	2.79969	0.00511514	NA	VSTM2B-DT	lncRNA
ENSG00000052850.8	364.994	4.75059	0.376898	12.6044	1.99572e-36	1.44419e-33	ALX4	protein_coding
ENSG00000151079	3.58107	4.74497	1.72354	2.75304	0.00590451	NA	KCNA6	protein_coding
ENSG00000183114.8	115.408	4.7446	0.528698	8.97412	2.85632e-19	4.22443e-17	FAM43B	protein_coding
ENSG00000176907.5	20.3298	4.74436	1.14362	4.14854	3.34596e-05	0.000512054	TCIM	protein_coding
ENSG00000171954.13	35.6401	4.74045	0.806136	5.88047	4.09114e-09	1.40738e-07	CYP4F22	protein_coding
ENSG00000120068.7	22.4933	4.70811	1.15442	4.07834	4.53585e-05	0.000670353	HOXB8	protein_coding
ENSG00000177103.15	3.65492	4.69732	2.02408	2.32072	0.0203022	NA	DSCAML1	protein_coding
ENSG00000089250	2.19706	4.69252	2.72725	1.7206	0.0853225	NA	NOS1	protein_coding
ENSG00000104332.12	1011.13	4.68755	0.696865	6.72663	1.73632e-11	9.40676e-10	SFRP1	protein_coding
ENSG00000179242.16	79.975	4.68013	0.66578	7.02955	2.07198e-12	1.2722e-10	CDH4	protein_coding
ENSG00000154764.6	19.9334	4.67329	0.932036	5.01407	5.32915e-07	1.21598e-05	WNT7A	protein_coding
ENSG00000171435.14	25.283	4.6693	0.902008	5.17657	2.26008e-07	5.62577e-06	KSR2	protein_coding
ENSG00000109625.19	41.4276	4.66733	1.07841	4.32796	1.50494e-05	0.000251593	CPZ	protein_coding
ENSG00000248587.8	12.8311	4.64947	1.36179	3.41423	0.00063962	0.00647029	GDNF-AS1	lncRNA
ENSG00000164619.10	2.70969	4.64271	1.62143	2.86333	0.00419207	NA	BMPER	protein_coding
ENSG00000110436.13	37.6313	4.63636	1.01716	4.55814	5.16087e-06	9.63774e-05	SLC1A2	protein_coding
ENSG00000138622.4	71.9511	4.62323	0.72321	6.39265	1.63038e-10	7.22859e-09	HCN4	protein_coding
ENSG00000146648	6.07941	4.62058	1.87499	2.46433	0.0137271	0.0749096	EGFR	protein_coding
ENSG00000213543.2	2.28488	4.60442	2.32516	1.98026	0.0476741	NA	RARRES2P2	processed_pseudogene
ENSG00000104722.14	18.3518	4.60059	1.16918	3.93488	8.32367e-05	0.00113191	NEFM	protein_coding
ENSG00000185565.12	52.1698	4.59503	1.41635	3.24428	0.00117749	0.0107084	LSAMP	protein_coding
ENSG00000165061.15	33.4932	4.59328	0.938248	4.89559	9.80115e-07	2.10556e-05	ZMAT4	protein_coding
ENSG00000149573.9	7.89329	4.5727	1.18008	3.8749	0.00010667	0.00140439	MPZL2	protein_coding
ENSG00000154678.18	26.2791	4.5711	1.15542	3.95621	7.61491e-05	0.00104961	PDE1C	protein_coding
ENSG00000112782.19	8.95925	4.55995	1.23245	3.6999	0.000215686	0.00259206	CLIC5	protein_coding
ENSG00000019505.8	48.7717	4.55066	0.921647	4.93752	7.91204e-07	1.735e-05	SYT13	protein_coding
ENSG00000164761.9	2.99748	4.54772	1.8699	2.43206	0.0150131	NA	TNFRSF11B	protein_coding
ENSG00000082175	137.936	4.54029	0.914862	4.96281	6.94797e-07	1.53858e-05	PGR	protein_coding
ENSG00000029534.21	49.9078	4.53857	0.741567	6.12024	9.34362e-10	3.63379e-08	ANK1	protein_coding
ENSG00000162105	97.1802	4.53001	1.13808	3.98039	6.88021e-05	0.000964753	SHANK2	protein_coding
ENSG00000099869.8	3.47506	4.52849	1.44106	3.14248	0.00167525	NA	IGF2-AS	lncRNA
ENSG00000287671.1	2.51478	4.52374	1.73831	2.60237	0.00925814	NA	ENSG00000287671	lncRNA
ENSG00000231107.2	1.42293	4.52195	2.00832	2.25161	0.0243468	NA	LINC01508	lncRNA
ENSG00000246627.6	2.40876	4.4989	1.715	2.62327	0.00870913	NA	CACNA1C-AS1	lncRNA
ENSG00000281732.1	1.91322	4.49736	2.08965	2.15221	0.0313809	NA	ENSG00000281732	lncRNA
ENSG00000277586.4	1044.44	4.48727	1.20017	3.73886	0.000184858	0.00227005	NEFL	protein_coding
ENSG00000258588.3	4.27076	4.45821	5.3561	0.832361	0.405205	0.680503	TRIM6-TRIM34	protein_coding
ENSG00000162631.20	44.0895	4.45819	0.968051	4.60532	4.11826e-06	7.79851e-05	NTNG1	protein_coding
ENSG00000110092.4	2932.84	4.43758	0.189161	23.4592	1.0637e-121	2.15526e-117	CCND1	protein_coding
ENSG00000237437.1	1.46007	4.42952	5.90138	0.750591	0.452899	NA	ASS1P12	processed_pseudogene
ENSG00000218052	1.09399	4.42806	3.80332	1.16426	0.244319	NA	ADAMTS7P4	transcribed_unprocessed_pseudogene
ENSG00000139292.13	52.5399	4.42111	0.920084	4.80511	1.54666e-06	3.19289e-05	LGR5	protein_coding
ENSG00000170382.12	58.2245	4.42074	0.556759	7.94013	2.01965e-15	2.00599e-13	LRRN2	protein_coding
ENSG00000021645.20	96.2301	4.42046	0.549106	8.05028	8.2607e-16	8.58351e-14	NRXN3	protein_coding
ENSG00000224982.4	1.7725	4.4034	1.63666	2.69048	0.00713487	NA	TMEM233	protein_coding
ENSG00000256542.2	2.29124	4.40038	2.08978	2.10567	0.0352334	NA	ENSG00000256542	lncRNA
ENSG00000139211.7	42.2568	4.39306	0.76475	5.74445	9.22218e-09	2.98498e-07	AMIGO2	protein_coding
ENSG00000131914.11	49.8494	4.39195	0.789408	5.5636	2.64267e-08	7.82833e-07	LIN28A	protein_coding
ENSG00000105251.11	10.7023	4.38673	1.47128	2.98157	0.00286771	0.0222883	SHD	protein_coding
ENSG00000066032.19	3.82559	4.38577	1.92489	2.27845	0.0226995	NA	CTNNA2	protein_coding
ENSG00000155093.19	170.011	4.35446	0.9784	4.45059	8.56348e-06	0.000152205	PTPRN2	protein_coding
ENSG00000008118.10	1.46087	4.34922	2.3296	1.86694	0.0619101	NA	CAMK1G	protein_coding
ENSG00000186479.5	5.50688	4.33671	1.90107	2.28119	0.022537	0.108374	RGS7BP	protein_coding
ENSG00000185101.13	11.4029	4.33286	1.4369	3.01541	0.00256631	0.0203996	ANO9	protein_coding
ENSG00000183780.13	18.4816	4.31848	0.974126	4.43318	9.28542e-06	0.000163317	SLC35F3	protein_coding
ENSG00000142549.10	85.4754	4.3097	0.746078	5.77647	7.62842e-09	2.50156e-07	IGLON5	protein_coding
ENSG00000250305.9	70.7992	4.30421	0.669776	6.42635	1.30708e-10	5.8723e-09	TRMT9B	protein_coding
ENSG00000196115.13	0.550679	4.30389	5.91753	0.727312	0.467035	NA	ADAM5	transcribed_unitary_pseudogene
ENSG00000155269.12	1.51956	4.30272	2.83162	1.51952	0.128631	NA	GPR78	protein_coding
ENSG00000179256.2	2.28833	4.297	1.52378	2.81995	0.00480308	NA	SMCO3	protein_coding
ENSG00000172348	7.61659	4.29308	1.59106	2.69824	0.00697063	0.044605	RCAN2	protein_coding
ENSG00000143171.13	9.14686	4.29091	1.16573	3.68089	0.000232423	0.00276208	RXRG	protein_coding
ENSG00000248610.1	1.51615	4.29029	2.38101	1.80188	0.0715639	NA	HSPA8P4	processed_pseudogene
ENSG00000243902.6	3.15953	4.27656	1.64328	2.60245	0.00925598	NA	ELFN2	lncRNA
ENSG00000175318.12	1.80387	4.26702	1.83781	2.3218	0.0202437	NA	GRAMD2A	protein_coding
ENSG00000111405.9	1.34006	4.2611	2.77251	1.53691	0.124315	NA	ENDOU	protein_coding
ENSG00000233786.1	7.18577	4.25994	1.42243	2.99482	0.00274605	0.021541	CDC27P1	processed_pseudogene
ENSG00000154864	88.5902	4.24421	1.24045	3.4215	0.000622778	0.00631568	PIEZO2	protein_coding
ENSG00000217767.2	10.0187	4.19573	1.81709	2.30904	0.0209414	0.102616	NDUFAB1P1	processed_pseudogene
ENSG00000164318.18	37.0428	4.19067	1.1693	3.58391	0.000338485	0.00378848	EGFLAM	protein_coding
ENSG00000185774.16	2.31042	4.18119	2.88537	1.4491	0.14731	NA	KCNIP4	protein_coding
ENSG00000131409.13	138.918	4.17192	0.808088	5.16271	2.43405e-07	5.99985e-06	LRRC4B	protein_coding
ENSG00000116254.18	156.027	4.16371	0.726217	5.73343	9.84195e-09	3.16536e-07	CHD5	protein_coding
ENSG00000230438	2.05368	4.15894	1.68613	2.46656	0.0136417	NA	SERPINB9P1	lncRNA
ENSG00000183454.18	2.57734	4.15484	2.18867	1.89833	0.057652	NA	GRIN2A	protein_coding
ENSG00000253230	44.9653	4.15126	0.609794	6.80764	9.92113e-12	5.5995e-10	MIR124-1HG	lncRNA
ENSG00000171956.7	6.35242	4.15036	1.34497	3.08583	0.00202982	0.0167324	FOXB1	protein_coding
ENSG00000260727.2	2.63036	4.14803	5.90388	0.702594	0.482309	NA	SLC7A5P1	transcribed_unprocessed_pseudogene
ENSG00000130508.11	10.0846	4.14383	1.6414	2.52457	0.0115839	0.0660314	PXDN	protein_coding
ENSG00000197415.12	3.09076	4.1438	1.70873	2.42507	0.0153053	NA	VEPH1	protein_coding
ENSG00000279146.1	1.22471	4.13494	2.7953	1.47925	0.139074	NA	ENSG00000279146	TEC
ENSG00000267343.2	1.48799	4.13275	5.65011	0.731446	0.464507	NA	ZNF833P	transcribed_unprocessed_pseudogene
ENSG00000064655.19	163.285	4.13229	0.397077	10.4068	2.30912e-25	7.089e-23	EYA2	protein_coding
ENSG00000285926.1	1.22366	4.12739	1.98434	2.07998	0.0375273	NA	ENSG00000285926	lncRNA
ENSG00000260537.2	1.17599	4.1263	5.00838	0.82388	0.410008	NA	ENSG00000260537	protein_coding
ENSG00000226147.1	2.72766	4.12554	2.34622	1.75838	0.0786837	NA	TUBBP10	processed_pseudogene
ENSG00000203799	1.47904	4.10806	2.21582	1.85397	0.0637441	NA	CCDC162P	transcribed_unitary_pseudogene
ENSG00000282728.1	1.39166	4.10354	2.44091	1.68115	0.0927339	NA	PGR-AS1	lncRNA
ENSG00000144583.5	3.11119	4.08945	1.59863	2.55809	0.0105248	NA	MARCHF4	protein_coding
ENSG00000172005.11	1.71287	4.08533	1.97355	2.07004	0.0384485	NA	MAL	protein_coding
ENSG00000142606.16	9.92038	4.08498	1.38296	2.95379	0.00313894	0.0239462	MMEL1	protein_coding
ENSG00000157703.16	3.80264	4.07057	1.96239	2.07429	0.0380523	NA	SVOPL	protein_coding
ENSG00000240253.6	8.8541	4.05867	1.37181	2.95863	0.00309009	0.0236537	FAR2P3	transcribed_unprocessed_pseudogene
ENSG00000058335.16	25.0883	4.05214	1.01574	3.98936	6.62521e-05	0.000936776	RASGRF1	protein_coding
ENSG00000272157	5.68581	4.03688	1.67015	2.41708	0.0156455	0.0824984	ENSG00000272157	lncRNA
ENSG00000149972	5.17295	4.01985	2.1781	1.84558	0.0649534	0.228527	CNTN5	protein_coding
ENSG00000145864.14	131.712	4.00131	1.0367	3.85965	0.000113548	0.00148914	GABRB2	protein_coding
ENSG00000132639	55.8619	3.99944	0.507194	7.88543	3.13451e-15	2.91337e-13	SNAP25	protein_coding
ENSG00000183715.14	0.987391	3.99492	3.3058	1.20846	0.226871	NA	OPCML	protein_coding
ENSG00000196092.14	69.5672	3.98533	0.661719	6.02269	1.71542e-09	6.35425e-08	PAX5	protein_coding
ENSG00000182022.18	139.652	3.98226	0.471508	8.44579	3.01995e-17	3.57838e-15	CHST15	protein_coding
ENSG00000224717.1	2.45737	3.97699	1.74436	2.27992	0.0226127	NA	LEMD1-DT	lncRNA
ENSG00000136297.15	2.68549	3.97643	2.23339	1.78044	0.0750035	NA	MMD2	protein_coding
ENSG00000145451.13	2.74534	3.97219	1.632	2.43393	0.0149357	NA	GLRA3	protein_coding
ENSG00000259031.1	1.39357	3.9665	2.0376	1.94665	0.0515761	NA	ENSG00000259031	lncRNA
ENSG00000286165.1	1.81077	3.96489	1.81978	2.17877	0.0293484	NA	ENSG00000286165	protein_coding
ENSG00000250378.4	1.4435	3.96368	2.22564	1.78091	0.0749265	NA	ENSG00000250378	lncRNA
ENSG00000187848.15	38.6904	3.96117	0.635776	6.23044	4.65126e-10	1.90392e-08	P2RX2	protein_coding
ENSG00000240031.1	1.18488	3.96013	1.83719	2.15553	0.0311203	NA	OR9A3P	transcribed_unprocessed_pseudogene
ENSG00000265490.1	2.36341	3.94732	1.58051	2.4975	0.0125073	NA	ENSG00000265490	lncRNA
ENSG00000241119.2	0.664575	3.94376	5.90606	0.667747	0.504295	NA	UGT1A9	protein_coding
ENSG00000261071	3.12456	3.94062	5.90609	0.667213	0.504636	NA	ENSG00000261071	lncRNA
ENSG00000070886.12	102.212	3.93444	0.356786	11.0275	2.8174e-28	1.05715e-25	EPHA8	protein_coding
ENSG00000133169.6	3.17916	3.92545	2.15217	1.82395	0.0681595	NA	BEX1	protein_coding
ENSG00000129354.12	1.16742	3.92062	2.35402	1.6655	0.0958131	NA	AP1M2	protein_coding
ENSG00000102452.18	17.5416	3.91318	0.979491	3.99511	6.46638e-05	0.000918806	NALCN	protein_coding
ENSG00000264668.2	1.16881	3.9116	3.78957	1.0322	0.301977	NA	ENSG00000264668	protein_coding
ENSG00000103528.17	113.217	3.90547	0.398657	9.79657	1.16476e-22	2.51068e-20	SYT17	protein_coding
ENSG00000106526.11	1.72209	3.89161	2.5441	1.52966	0.126101	NA	ACTR3C	protein_coding
ENSG00000141469.18	0.75223	3.88322	5.3158	0.730506	0.465081	NA	SLC14A1	protein_coding
ENSG00000263070.1	1.0209	3.87741	4.89779	0.791664	0.428557	NA	ENSG00000263070	transcribed_unprocessed_pseudogene
ENSG00000258232.2	1.70736	3.87643	2.74172	1.41387	0.157401	NA	ENSG00000258232	lncRNA
ENSG00000118160.14	46.0818	3.86151	0.873658	4.41993	9.87319e-06	0.000172161	SLC8A2	protein_coding
ENSG00000156113.24	92.8275	3.84498	0.828571	4.6405	3.4757e-06	6.70072e-05	KCNMA1	protein_coding
ENSG00000275297.1	1.79911	3.83125	1.97755	1.93737	0.0526996	NA	ENSG00000275297	lncRNA
ENSG00000285969.1	1.69377	3.82688	2.0432	1.87298	0.0610711	NA	ENSG00000285969	lncRNA
ENSG00000146352.13	7.80746	3.82644	1.73075	2.21085	0.0270461	0.123314	CLVS2	protein_coding
ENSG00000272979.1	1.43883	3.81846	1.66759	2.2898	0.0220329	NA	ENSG00000272979	lncRNA
ENSG00000182566	2.25166	3.81258	2.46383	1.54742	0.121762	NA	CLEC4G	protein_coding
ENSG00000257607.1	1.32248	3.79823	5.74776	0.66082	0.508728	NA	ENSG00000257607	lncRNA
ENSG00000259165.1	2.34241	3.79735	1.4053	2.70216	0.00688898	NA	DDX18P1	processed_pseudogene
ENSG00000067842.18	68.2224	3.79281	0.63444	5.97819	2.25625e-09	8.14903e-08	ATP2B3	protein_coding
ENSG00000154556	5.75567	3.78858	1.81425	2.08823	0.0367771	0.153772	SORBS2	protein_coding
ENSG00000280168.1	2.12432	3.78682	1.4936	2.53536	0.0112331	NA	ENSG00000280168	TEC
ENSG00000235601.1	0.71535	3.78591	5.35142	0.70746	0.47928	NA	BARX1-DT	lncRNA
ENSG00000152292	2.53576	3.78185	1.6191	2.33578	0.0195027	NA	SH2D6	protein_coding
ENSG00000196826.7	0.368007	3.78132	5.90803	0.64003	0.522153	NA	ENSG00000196826	protein_coding
ENSG00000285492	11.2652	3.77903	1.43447	2.63444	0.00842768	0.0517477	ENSG00000285492	lncRNA
ENSG00000187773.9	2.07405	3.77436	2.02107	1.86751	0.0618311	NA	DIPK1C	protein_coding
ENSG00000151838.12	0.469476	3.77017	5.93178	0.635589	0.525044	NA	CCDC175	protein_coding
ENSG00000225206	9.87188	3.76381	1.23256	3.05366	0.00226068	0.018315	MIR137HG	lncRNA
ENSG00000117152.14	15.4185	3.75704	1.93205	1.94459	0.0518246	0.195311	RGS4	protein_coding
ENSG00000177301.16	80.6756	3.75223	0.746566	5.02599	5.0083e-07	1.15535e-05	KCNA2	protein_coding
ENSG00000152954.12	1.52319	3.75142	2.09401	1.7915	0.0732124	NA	NRSN1	protein_coding
ENSG00000080493	45.3962	3.75135	0.540892	6.93548	4.04854e-12	2.39858e-10	SLC4A4	protein_coding
ENSG00000185532.20	21.0379	3.74094	1.39892	2.67416	0.00749157	0.0471745	PRKG1	protein_coding
ENSG00000243836	8.03597	3.73613	1.19186	3.1347	0.00172031	0.0146028	WDR86-AS1	lncRNA
ENSG00000227508.6	0.735977	3.7339	5.2809	0.707057	0.479531	NA	LINC01624	lncRNA
ENSG00000168952	36.4997	3.73202	2.18486	1.70813	0.0876122	0.277632	STXBP6	protein_coding
ENSG00000100346.18	13.1588	3.72778	1.154	3.23031	0.00123656	0.0111091	CACNA1I	protein_coding
ENSG00000125850.11	38.762	3.71809	0.552178	6.73349	1.65643e-11	8.99801e-10	OVOL2	protein_coding
ENSG00000205457	1.15989	3.71596	4.20615	0.883458	0.376989	NA	TP53TG3C	protein_coding
ENSG00000241020.1	0.813935	3.70685	5.90901	0.627322	0.530448	NA	RPL32P24	processed_pseudogene
ENSG00000241754.2	1.66902	3.70381	1.51931	2.43782	0.014776	NA	ENSG00000241754	lncRNA
ENSG00000152402.11	136.961	3.70371	0.402596	9.19957	3.59379e-20	6.06811e-18	GUCY1A2	protein_coding
ENSG00000233061.1	1.69765	3.69847	1.76657	2.09358	0.0362971	NA	TTLL7-IT1	lncRNA
ENSG00000205018.2	1.50979	3.69477	1.83843	2.00974	0.0444585	NA	ENSG00000205018	lncRNA
ENSG00000261655.1	3.33789	3.69253	1.52359	2.42357	0.0153687	NA	ENSG00000261655	lncRNA
ENSG00000162761.14	62.072	3.686	0.548571	6.71927	1.8264e-11	9.81605e-10	LMX1A	protein_coding
ENSG00000068781.21	9.41779	3.6858	1.4219	2.59215	0.00953771	0.056739	STON1-GTF2A1L	protein_coding
ENSG00000279086.1	0.746806	3.68404	2.5696	1.43371	0.151656	NA	ENSG00000279086	TEC
ENSG00000130035.9	4.98588	3.68099	1.35319	2.72022	0.00652379	0.0425461	GALNT8	protein_coding
ENSG00000203335.5	0.868896	3.67884	2.71595	1.35453	0.175567	NA	ENSG00000203335	lncRNA
ENSG00000167244	1393.83	3.66958	0.281723	13.0255	8.76123e-39	7.39666e-36	IGF2	protein_coding
ENSG00000155052.15	11.5535	3.66353	0.836419	4.38002	1.18667e-05	0.000202564	CNTNAP5	protein_coding
ENSG00000234969.1	0.914588	3.66255	2.09377	1.74926	0.0802467	NA	AARSD1P1	processed_pseudogene
ENSG00000114654.8	12.2718	3.65968	1.11385	3.28561	0.00101763	0.00951506	EFCC1	protein_coding
ENSG00000198963.11	80.8603	3.65373	1.05369	3.46755	0.000525232	0.0054857	RORB	protein_coding
ENSG00000280425.2	0.951652	3.6531	1.95748	1.86623	0.0620093	NA	ENSG00000280425	lncRNA
ENSG00000049540	0.820111	3.6486	3.25712	1.12019	0.262631	NA	ELN	protein_coding
ENSG00000170848.16	0.78354	3.6463	2.82477	1.29083	0.196762	NA	PSG6	protein_coding
ENSG00000257767.3	0.729511	3.63946	5.90998	0.615817	0.538015	NA	ENSG00000257767	protein_coding
ENSG00000170689.10	524.112	3.63373	0.199898	18.1779	7.72537e-74	7.82657e-70	HOXB9	protein_coding
ENSG00000267335.2	1.82006	3.63175	1.96823	1.84519	0.0650102	NA	ENSG00000267335	protein_coding
ENSG00000187134.14	215.421	3.63008	0.457416	7.93607	2.08684e-15	2.06261e-13	AKR1C1	protein_coding
ENSG00000261093.1	1.84755	3.62871	5.91008	0.613986	0.539224	NA	ENSG00000261093	lncRNA
ENSG00000254400.1	1.43003	3.62628	3.46435	1.04674	0.295219	NA	ENSG00000254400	lncRNA
ENSG00000260075.1	2.20124	3.62504	5.91011	0.613362	0.539637	NA	NSFP1	unprocessed_pseudogene
ENSG00000149506	0.874466	3.62318	2.95436	1.22638	0.220055	NA	ZP1	protein_coding
ENSG00000285160.1	1.65604	3.61763	5.91019	0.612101	0.540471	NA	THSD1P1	transcribed_unprocessed_pseudogene
ENSG00000102287.19	0.881288	3.61264	4.25143	0.849747	0.395466	NA	GABRE	protein_coding
ENSG00000265845.2	1.37172	3.61139	2.19844	1.64271	0.100444	NA	ENSG00000265845	lncRNA
ENSG00000163239.12	0.730698	3.6104	2.56946	1.40512	0.159986	NA	TDRD10	protein_coding
ENSG00000164694.17	117.49	3.60772	0.376022	9.59443	8.43818e-22	1.67622e-19	FNDC1	protein_coding
ENSG00000187678.10	46.7197	3.59908	0.537741	6.69296	2.18703e-11	1.154e-09	SPRY4	protein_coding
ENSG00000124143	1.61268	3.57506	2.71723	1.3157	0.188274	NA	ARHGAP40	protein_coding
ENSG00000078053.17	221.201	3.57077	0.401997	8.88259	6.53226e-19	9.19143e-17	AMPH	protein_coding
ENSG00000145536.15	1.61778	3.56513	1.60747	2.21785	0.0265648	NA	ADAMTS16	protein_coding
ENSG00000240494.2	0.316814	3.56371	5.91101	0.602893	0.54658	NA	RPS12P28	processed_pseudogene
ENSG00000154096.14	770.1	3.55259	0.811616	4.37718	1.20222e-05	0.000204701	THY1	protein_coding
ENSG00000231464.1	1.91421	3.55238	1.93791	1.8331	0.0667874	NA	ENSG00000231464	processed_pseudogene
ENSG00000180190.13	0.713766	3.55217	2.21531	1.60347	0.108832	NA	TDRP	protein_coding
ENSG00000288550	8.34668	3.5488	1.72951	2.0519	0.0401791	0.163574	ENSG00000288550	protein_coding
ENSG00000243305.1	0.469967	3.54816	5.91128	0.600235	0.548349	NA	ENSG00000243305	lncRNA
ENSG00000272050.1	0.807123	3.53766	3.08395	1.14712	0.251332	NA	ENSG00000272050	lncRNA
ENSG00000184672.12	11.6678	3.53641	1.2098	2.92314	0.00346517	0.0259274	RALYL	protein_coding
ENSG00000143502.16	30.1501	3.53606	0.702829	5.03118	4.87463e-07	1.1288e-05	SUSD4	protein_coding
ENSG00000125255.7	9.33194	3.53604	1.20264	2.94024	0.00327956	0.0248042	SLC10A2	protein_coding
ENSG00000183166.11	11.3599	3.53408	1.47202	2.40083	0.0163578	0.0852268	CALN1	protein_coding
ENSG00000135312.7	3.63207	3.53375	1.49531	2.36322	0.0181167	NA	HTR1B	protein_coding
ENSG00000160179.19	14.9769	3.53165	0.922938	3.82653	0.000129961	0.00167086	ABCG1	protein_coding
ENSG00000205632.4	0.349795	3.53121	5.9113	0.597367	0.550262	NA	LINC01310	lncRNA
ENSG00000198542	1.26797	3.52932	1.91338	1.84455	0.0651032	NA	ITGBL1	protein_coding
ENSG00000183674.12	2.05154	3.5282	1.71469	2.05763	0.0396256	NA	LINC00518	lncRNA
ENSG00000150628.7	1.47437	3.52619	1.88113	1.87451	0.0608599	NA	SPATA4	protein_coding
ENSG00000101180	10.9648	3.52394	0.903262	3.90135	9.56593e-05	0.00128022	HRH3	protein_coding
ENSG00000254229	1.18961	3.52159	2.58892	1.36026	0.173748	NA	FAM90A12P	protein_coding
ENSG00000130427.3	1.55268	3.51803	1.68281	2.09057	0.0365667	NA	EPO	protein_coding
ENSG00000100652.5	2.10648	3.51641	1.51615	2.3193	0.0203785	NA	SLC10A1	protein_coding
ENSG00000125414.19	0.971195	3.51551	2.63804	1.33262	0.182656	NA	MYH2	protein_coding
ENSG00000228643.1	0.810867	3.5147	2.71357	1.29523	0.195241	NA	ENSG00000228643	lncRNA
ENSG00000267338.1	3.06031	3.51368	1.83274	1.91717	0.0552159	NA	ENSG00000267338	lncRNA
ENSG00000258072.1	4.20412	3.50653	1.65311	2.12117	0.0339078	0.145006	ENSG00000258072	processed_pseudogene
ENSG00000272170.1	1.04436	3.50454	2.12817	1.64673	0.0996125	NA	KLC4-AS1	lncRNA
ENSG00000226758.1	1.45422	3.49881	1.85379	1.88738	0.059109	NA	DISC1-IT1	lncRNA
ENSG00000196353	33.3185	3.49648	0.912255	3.83279	0.000126697	0.00163241	CPNE4	protein_coding
ENSG00000279807.1	1.48104	3.49115	1.54074	2.26589	0.0234579	NA	ENSG00000279807	TEC
ENSG00000227495.1	1.09946	3.48912	1.76687	1.97475	0.0482965	NA	KIF1C-AS1	lncRNA
ENSG00000183840.7	2.31192	3.48852	2.21074	1.57799	0.114569	NA	GPR39	protein_coding
ENSG00000065609	64.4691	3.48802	0.793974	4.39312	1.11738e-05	0.000192029	SNAP91	protein_coding
ENSG00000222489.1	1.49746	3.48742	2.0594	1.69341	0.0903766	NA	SNORA79B	snoRNA
ENSG00000265413.1	1.41267	3.48553	1.84569	1.88847	0.0589627	NA	ENSG00000265413	lncRNA
ENSG00000145808.10	12.7517	3.47618	1.41709	2.45305	0.0141652	0.0766806	ADAMTS19	protein_coding
ENSG00000166634.7	3.31034	3.47601	2.09098	1.66238	0.0964363	NA	SERPINB12	protein_coding
ENSG00000157423.18	20.7107	3.47017	0.7039	4.92991	8.22657e-07	1.79813e-05	HYDIN	protein_coding
ENSG00000283578.1	0.714842	3.46984	3.3615	1.03223	0.301965	NA	MTND5P42	processed_pseudogene
ENSG00000145075.13	4.3801	3.46415	2.5807	1.34233	0.17949	0.432816	ENSG00000145075	lncRNA
ENSG00000228971	1.23538	3.46139	2.61861	1.32184	0.18622	NA	LINC02607	lncRNA
ENSG00000154080.14	50.4545	3.45647	0.521581	6.6269	3.42805e-11	1.75402e-09	CHST9	protein_coding
ENSG00000265967.1	1.05918	3.45557	5.91266	0.584437	0.558927	NA	ENSG00000265967	lncRNA
ENSG00000111218.12	23.2007	3.44166	0.905753	3.79978	0.000144825	0.00183288	PRMT8	protein_coding
ENSG00000256943.1	3.55722	3.4403	1.83586	1.87394	0.0609382	NA	ENSG00000256943	lncRNA
ENSG00000149294.17	353.718	3.44008	0.350217	9.82272	8.98811e-23	1.97953e-20	NCAM1	protein_coding
ENSG00000243137.8	1.08765	3.43686	2.11043	1.62851	0.103417	NA	PSG4	protein_coding
ENSG00000273294.1	3.02723	3.42828	4.40451	0.778358	0.436358	NA	C1QTNF3-AMACR	protein_coding
ENSG00000162949.16	1.47719	3.42719	2.06358	1.66079	0.0967546	NA	CAPN13	protein_coding
ENSG00000187753.13	2.60905	3.42526	1.46783	2.33355	0.0196193	NA	C9orf153	protein_coding
ENSG00000125533.6	32.8641	3.42438	0.634515	5.39685	6.78198e-08	1.85447e-06	BHLHE23	protein_coding
ENSG00000100557.10	0.786433	3.42339	2.84816	1.20196	0.229377	NA	CCDC198	protein_coding
ENSG00000230417.12	0.685101	3.42178	4.56875	0.748954	0.453885	NA	LINC00595	lncRNA
ENSG00000257184.3	0.374079	3.41912	5.91318	0.57822	0.563115	NA	ENSG00000257184	protein_coding
ENSG00000239268	4.9129	3.39702	1.46817	2.31378	0.0206799	0.101654	ENSG00000239268	lncRNA
ENSG00000131831.18	21.1619	3.3966	0.982593	3.45677	0.000546682	0.00566302	RAI2	protein_coding
ENSG00000124493.14	45.4755	3.39586	0.504269	6.73422	1.64814e-11	8.97704e-10	GRM4	protein_coding
ENSG00000234232.7	1.3501	3.39472	1.90062	1.78612	0.0740806	NA	PDE4DIPP7	transcribed_unprocessed_pseudogene
ENSG00000135638.14	143.298	3.39433	0.260079	13.0512	6.2566e-39	5.5118e-36	EMX1	protein_coding
ENSG00000255655.1	0.641159	3.38863	2.99009	1.13329	0.257094	NA	ENSG00000255655	lncRNA
ENSG00000213344.2	1.9161	3.38707	1.5239	2.22264	0.0262403	NA	PCNPP3	processed_pseudogene
ENSG00000182836.10	6.46317	3.38525	1.0863	3.11632	0.00183126	0.015358	PLCXD3	protein_coding
ENSG00000104432.14	12.6868	3.38447	0.892877	3.79052	0.000150331	0.00189546	IL7	protein_coding
ENSG00000176692.8	18.0272	3.38002	0.790393	4.27637	1.89963e-05	0.000308169	FOXC2	protein_coding
ENSG00000183067	0.338084	3.37864	5.92686	0.570055	0.56864	NA	IGSF5	protein_coding
ENSG00000261949.7	1.22407	3.37388	2.34336	1.43976	0.149935	NA	GFY	protein_coding
ENSG00000258926.2	1.42162	3.373	1.65419	2.03907	0.0414431	NA	ENSG00000258926	lncRNA
ENSG00000229278	1.20368	3.37114	2.1376	1.57707	0.114779	NA	ENSG00000229278	lncRNA
ENSG00000262152.7	1.91701	3.36848	1.88289	1.78899	0.0736165	NA	GREP1	protein_coding
ENSG00000177337	19.2725	3.3673	0.856095	3.93332	8.37799e-05	0.00113853	DLGAP1-AS1	lncRNA
ENSG00000232086.1	7.21153	3.36451	1.12759	2.9838	0.00284693	0.0221693	ENSG00000232086	lncRNA
ENSG00000106772	29.727	3.36329	0.775374	4.33763	1.44027e-05	0.000241578	PRUNE2	protein_coding
ENSG00000261783.1	1.70307	3.36235	1.59512	2.10789	0.0350403	NA	ENSG00000261783	lncRNA
ENSG00000270696.1	8.99215	3.36164	1.43171	2.34799	0.0188748	0.0950401	ENSG00000270696	lncRNA
ENSG00000215343	0.5599	3.35992	3.91444	0.858341	0.390704	NA	ZNF705D	protein_coding
ENSG00000155265.11	6.24857	3.35637	1.19822	2.80112	0.00509249	0.0351275	GOLGA7B	protein_coding
ENSG00000170962.13	29.0914	3.34967	0.66438	5.0418	4.61165e-07	1.0728e-05	PDGFD	protein_coding
ENSG00000196557.13	759.452	3.34665	0.20092	16.6566	2.71068e-62	1.3731e-58	CACNA1H	protein_coding
ENSG00000242908.6	0.655397	3.34497	3.32361	1.00643	0.31421	NA	AADACL2-AS1	lncRNA
ENSG00000251468.2	1.68286	3.34258	1.73302	1.92876	0.0537611	NA	ENSG00000251468	unprocessed_pseudogene
ENSG00000266010	3.26109	3.34112	1.28451	2.60109	0.00929286	NA	GATA6-AS1	lncRNA
ENSG00000230202.1	1.04299	3.33544	2.25372	1.47997	0.13888	NA	ENSG00000230202	processed_pseudogene
ENSG00000261575	1.58549	3.33446	1.76575	1.88841	0.0589707	NA	ENSG00000261575	transcribed_unprocessed_pseudogene
ENSG00000165186.12	156.44	3.33429	1.02588	3.25018	0.00115332	0.0105169	PTCHD1	protein_coding
ENSG00000229207.1	2.12663	3.32711	1.62262	2.05045	0.0403204	NA	SERPINH1P1	processed_pseudogene
ENSG00000288658	44.6746	3.32697	0.549246	6.05735	1.38385e-09	5.24105e-08	ENSG00000288658	protein_coding
ENSG00000261963	4.42824	3.32679	1.34471	2.47397	0.0133619	0.0734507	NA	NA
ENSG00000130656.6	1.2629	3.32035	2.05716	1.61405	0.106518	NA	HBZ	protein_coding
ENSG00000141433.13	6.48507	3.31691	1.27848	2.59442	0.00947511	0.0564495	ADCYAP1	protein_coding
ENSG00000160471.13	29.1898	3.31146	0.873325	3.79179	0.000149566	0.00188817	COX6B2	protein_coding
ENSG00000169116.11	337.533	3.30584	0.753632	4.38654	1.15168e-05	0.000197256	PARM1	protein_coding
ENSG00000151632	11.1254	3.30538	0.943785	3.50226	0.000461334	0.0049017	AKR1C2	protein_coding
ENSG00000261063.1	0.504845	3.30415	5.68783	0.580916	0.561297	NA	ENSG00000261063	lncRNA
ENSG00000184985.16	26.9089	3.30241	1.17236	2.8169	0.00484899	0.0337166	SORCS2	protein_coding
ENSG00000181649.8	124.813	3.30052	0.263277	12.5363	4.723e-36	3.18991e-33	PHLDA2	protein_coding
ENSG00000287403.1	0.804046	3.29497	2.27926	1.44563	0.148281	NA	ENSG00000287403	lncRNA
ENSG00000170961.7	1.93788	3.29311	2.77454	1.18691	0.235265	NA	HAS2	protein_coding
ENSG00000235760.4	0.951464	3.29183	2.34612	1.4031	0.160588	NA	MSH2-OT1	lncRNA
ENSG00000287360.1	0.683956	3.29105	2.37321	1.38675	0.165519	NA	ENSG00000287360	lncRNA
ENSG00000213228.5	2.31991	3.29056	1.66479	1.97656	0.0480918	NA	RPL12P38	transcribed_processed_pseudogene
ENSG00000237328.1	0.57911	3.2894	2.77731	1.18438	0.236261	NA	RAI1-AS1	lncRNA
ENSG00000110786.18	7.43365	3.28869	1.42509	2.3077	0.0210157	0.10288	PTPN5	protein_coding
ENSG00000286244.1	2.26091	3.28704	1.60233	2.05142	0.0402259	NA	ENSG00000286244	lncRNA
ENSG00000175445.17	175.974	3.2868	0.362174	9.07518	1.13486e-19	1.78253e-17	LPL	protein_coding
ENSG00000260253.1	0.765293	3.28655	2.27548	1.44433	0.148646	NA	ENSG00000260253	lncRNA
ENSG00000115594.12	21.5392	3.28271	0.823445	3.98656	6.7039e-05	0.000945264	IL1R1	protein_coding
ENSG00000187957.8	72.1481	3.28039	0.448729	7.31041	2.66327e-13	1.89344e-11	DNER	protein_coding
ENSG00000196581.11	6.58748	3.27947	1.28288	2.55634	0.010578	0.061325	AJAP1	protein_coding
ENSG00000162040.7	17.4796	3.27888	0.666707	4.91802	8.7425e-07	1.89455e-05	HS3ST6	protein_coding
ENSG00000163814.8	40.6382	3.27715	0.608117	5.38901	7.08463e-08	1.91654e-06	CDCP1	protein_coding
ENSG00000256802	4.40855	3.27703	1.91284	1.71317	0.0866812	0.275936	ENSG00000256802	lncRNA
ENSG00000231185	0.863059	3.27655	3.3483	0.978571	0.327792	NA	SPRY4-AS1	lncRNA
ENSG00000148053	9.63551	3.27547	1.52636	2.14593	0.0318782	0.138638	NTRK2	protein_coding
ENSG00000271127.2	6.71063	3.27321	1.12264	2.91565	0.0035495	0.0263783	ENSG00000271127	transcribed_unprocessed_pseudogene
ENSG00000272934	1.82008	3.27231	2.10907	1.55154	0.120771	NA	NA	NA
ENSG00000176771	22.2745	3.2715	1.63804	1.9972	0.0458035	0.17958	NCKAP5	protein_coding
ENSG00000132854.19	68.4357	3.26671	0.551502	5.9233	3.15537e-09	1.11578e-07	KANK4	protein_coding
ENSG00000157445.15	78.8632	3.26605	0.342217	9.54381	1.37682e-21	2.68243e-19	CACNA2D3	protein_coding
ENSG00000230806.1	3.7474	3.26187	1.68474	1.93612	0.0528529	NA	SRGAP2-AS1	lncRNA
ENSG00000206903.1	0.482929	3.25404	5.94126	0.547702	0.583896	NA	SNORA24B	snoRNA
ENSG00000233087.8	48.8891	3.25102	0.413396	7.86418	3.71517e-15	3.37564e-13	RAB6D	protein_coding
ENSG00000287990.1	4.39916	3.24866	1.41889	2.28957	0.0220462	0.106509	ENSG00000287990	lncRNA
ENSG00000148488.17	14.6043	3.24731	0.785651	4.13327	3.57642e-05	0.000544035	ST8SIA6	protein_coding
ENSG00000111796.4	1.87324	3.24701	1.52319	2.13171	0.0330305	NA	KLRB1	protein_coding
ENSG00000259005.1	1.87246	3.23987	1.60487	2.01877	0.0435113	NA	ENSG00000259005	lncRNA
ENSG00000287870.1	2.47753	3.23573	1.4894	2.1725	0.0298177	NA	ENSG00000287870	lncRNA
ENSG00000175766.13	1.48868	3.23371	2.43671	1.32708	0.184483	NA	EIF4E1B	protein_coding
ENSG00000049323.16	306.303	3.23363	0.32167	10.0526	8.9461e-24	2.26582e-21	LTBP1	protein_coding
ENSG00000183668.18	1.97225	3.23212	1.79721	1.7984	0.0721131	NA	PSG9	protein_coding
ENSG00000167759.13	0.778392	3.23211	2.79758	1.15532	0.247959	NA	KLK13	protein_coding
ENSG00000152137.8	58.7936	3.2183	0.721139	4.4628	8.08946e-06	0.000144945	HSPB8	protein_coding
ENSG00000197826.12	0.595687	3.21676	4.01943	0.800302	0.423536	NA	CFAP299	protein_coding
ENSG00000156395.14	3.31006	3.21618	1.8268	1.76055	0.0783146	NA	SORCS3	protein_coding
ENSG00000253474.2	0.512948	3.21564	4.73566	0.679027	0.497121	NA	ENSG00000253474	lncRNA
ENSG00000254231.3	4.05183	3.21463	1.51486	2.12206	0.0338326	0.144746	WWP1-AS1	lncRNA
ENSG00000275185.1	0.759265	3.21188	5.91691	0.542832	0.587246	NA	ENSG00000275185	lncRNA
ENSG00000172137.19	4.22214	3.21161	1.44323	2.22529	0.0260621	0.120043	CALB2	protein_coding
ENSG00000280400.1	0.248208	3.21024	5.91693	0.542551	0.587439	NA	ENSG00000280400	TEC
ENSG00000258590.5	8.93995	3.20337	0.986433	3.24743	0.00116452	0.0106047	NBEAP1	transcribed_unprocessed_pseudogene
ENSG00000113430.10	9.51473	3.20282	1.30873	2.44728	0.0143937	0.0774971	IRX4	protein_coding
ENSG00000135919.14	243.046	3.20193	0.596771	5.36542	8.07625e-08	2.1703e-06	SERPINE2	protein_coding
ENSG00000152128.13	86.0447	3.19976	0.470339	6.80309	1.02398e-11	5.76328e-10	TMEM163	protein_coding
ENSG00000138356.14	4.70531	3.18091	1.42283	2.23562	0.0253766	0.11785	AOX1	protein_coding
ENSG00000143632.15	3.02874	3.18025	1.52839	2.08079	0.0374535	NA	ACTA1	protein_coding
ENSG00000102924.12	144.405	3.17629	0.474136	6.69912	2.09679e-11	1.11803e-09	CBLN1	protein_coding
ENSG00000104059.5	53.8922	3.17531	0.58026	5.47221	4.44453e-08	1.27919e-06	FAM189A1	protein_coding
ENSG00000185046	28.1497	3.17275	0.747914	4.24213	2.21405e-05	0.000352127	ANKS1B	protein_coding
ENSG00000189238.6	6.31411	3.16779	1.34788	2.3502	0.0187631	0.094666	LINC00943	lncRNA
ENSG00000185652.12	1.63201	3.1649	3.08365	1.02635	0.304727	NA	NTF3	protein_coding
ENSG00000090530.10	25.8334	3.15795	0.746007	4.23313	2.30457e-05	0.000365664	P3H2	protein_coding
ENSG00000250853.1	0.570337	3.15718	3.34748	0.943151	0.345604	NA	RNF138P1	processed_pseudogene
ENSG00000183844.17	0.287431	3.15451	5.9167	0.533155	0.593926	NA	FAM3B	protein_coding
ENSG00000224273.2	0.559438	3.1509	3.95539	0.796609	0.425678	NA	RABGEF1P3	transcribed_unprocessed_pseudogene
ENSG00000151067.23	17.3444	3.14139	1.13594	2.76545	0.00568438	0.038176	CACNA1C	protein_coding
ENSG00000136928.7	65.494	3.13971	0.725625	4.32691	1.51217e-05	0.000252593	GABBR2	protein_coding
ENSG00000137962.13	194.95	3.1377	0.250342	12.5337	4.88597e-36	3.19353e-33	ARHGAP29	protein_coding
ENSG00000232489.1	1.30641	3.13488	1.8169	1.7254	0.0844548	NA	MFAP1P1	processed_pseudogene
ENSG00000081803	109.89	3.12937	0.423205	7.39445	1.41991e-13	1.03864e-11	CADPS2	protein_coding
ENSG00000011201.12	41.7744	3.12865	0.753396	4.15273	3.28537e-05	0.000504687	ANOS1	protein_coding
ENSG00000255346.10	2.3872	3.12836	1.87639	1.66723	0.0954696	NA	NOX5	protein_coding
ENSG00000242220.9	12.9366	3.12674	0.855054	3.65678	0.000255404	0.00299653	TCP10L	protein_coding
ENSG00000134207.17	101.936	3.12506	0.520871	5.99968	1.97701e-09	7.23071e-08	SYT6	protein_coding
ENSG00000266709.1	13.5673	3.12365	0.745089	4.19232	2.76113e-05	0.000430353	ENSG00000266709	lncRNA
ENSG00000237732	15.2391	3.11873	0.662526	4.70734	2.50975e-06	5.00026e-05	CT75	transcribed_unprocessed_pseudogene
ENSG00000229519.2	1.89599	3.11331	1.76009	1.76884	0.0769207	NA	ENSG00000229519	processed_pseudogene
ENSG00000181631.7	4.48783	3.10845	1.52789	2.03447	0.0419043	0.168733	P2RY13	protein_coding
ENSG00000231548.2	1.66976	3.10336	1.7028	1.82251	0.0683782	NA	OR55B1P	transcribed_unitary_pseudogene
ENSG00000159248.5	0.229895	3.10175	5.91905	0.524028	0.600259	NA	GJD2	protein_coding
ENSG00000078295.17	29.3625	3.09872	0.697172	4.4447	8.80148e-06	0.000156024	ADCY2	protein_coding
ENSG00000275097.1	1.23724	3.09861	1.99757	1.55119	0.120855	NA	ENSG00000275097	lncRNA
ENSG00000271765.1	0.487404	3.09724	3.38449	0.915128	0.360124	NA	RN7SKP299	misc_RNA
ENSG00000124103.10	0.952222	3.09654	2.05262	1.50858	0.131407	NA	FAM209A	protein_coding
ENSG00000284671.1	0.854848	3.096	2.0663	1.49833	0.134046	NA	ENSG00000284671	transcribed_unprocessed_pseudogene
ENSG00000148123.15	8.53927	3.09557	1.20562	2.56761	0.0102403	0.0598294	PLPPR1	protein_coding
ENSG00000239774.1	0.971187	3.09505	1.69466	1.82635	0.0677979	NA	TTC14-DT	lncRNA
ENSG00000288086.1	0.404932	3.09486	4.81021	0.643395	0.519968	NA	ENSG00000288086	lncRNA
ENSG00000250016.2	0.995019	3.09479	2.13363	1.45048	0.146925	NA	SNX18P23	processed_pseudogene
ENSG00000250742	1.96838	3.09138	1.71135	1.80639	0.0708568	NA	LINC02381	lncRNA
ENSG00000103489.12	89.7676	3.09072	0.622476	4.96521	6.86275e-07	1.52137e-05	XYLT1	protein_coding
ENSG00000257335.8	11.3869	3.09038	0.950706	3.25062	0.00115156	0.010515	MGAM	protein_coding
ENSG00000172782.13	12.726	3.09028	1.0097	3.0606	0.00220894	0.0179913	FADS6	protein_coding
ENSG00000139364.11	3.82593	3.0811	1.24006	2.48463	0.0129686	NA	TMEM132B	protein_coding
ENSG00000156466	1.26124	3.08079	2.2245	1.38494	0.166072	NA	GDF6	protein_coding
ENSG00000214784.4	0.619556	3.0806	2.48763	1.23837	0.21558	NA	RPS3AP21	processed_pseudogene
ENSG00000271040.1	1.18019	3.07883	1.70642	1.80426	0.0711909	NA	TMEM242-DT	lncRNA
ENSG00000172927	1.36957	3.07793	1.9075	1.6136	0.106615	NA	MYEOV	protein_coding
ENSG00000232150.3	0.599899	3.07756	2.58523	1.19044	0.233874	NA	ST13P4	processed_pseudogene
ENSG00000279841.1	0.999682	3.07572	2.20854	1.39265	0.163726	NA	ENSG00000279841	TEC
ENSG00000204175	2.05778	3.07394	2.09959	1.46407	0.143176	NA	GPRIN2	protein_coding
ENSG00000203782.6	0.685471	3.07342	3.75889	0.81764	0.413563	NA	LORICRIN	protein_coding
ENSG00000274547.1	1.58401	3.07242	2.70634	1.13527	0.256264	NA	ENSG00000274547	misc_RNA
ENSG00000273565	1.25745	3.07202	2.30335	1.33372	0.182297	NA	ENSG00000273565	lncRNA
ENSG00000146038.12	1.69378	3.07151	1.60681	1.91155	0.0559334	NA	DCDC2	protein_coding
ENSG00000220237.1	0.431251	3.07129	4.79855	0.640046	0.522142	NA	RPS24P12	processed_pseudogene
ENSG00000273679.1	0.394945	3.06887	5.91965	0.51842	0.604165	NA	ENSG00000273679	processed_pseudogene
ENSG00000259798.1	0.427657	3.06789	5.91963	0.518257	0.604279	NA	ENSG00000259798	lncRNA
ENSG00000261502.4	1.29757	3.06407	1.87068	1.63795	0.101432	NA	ENSG00000261502	lncRNA
ENSG00000282943.1	0.243165	3.06319	5.93855	0.515814	0.605984	NA	ENSG00000282943	lncRNA
ENSG00000176678.6	9.61343	3.06278	1.11256	2.75292	0.00590665	0.0393816	FOXL1	protein_coding
ENSG00000286655.1	1.56403	3.06248	1.73825	1.76182	0.0781002	NA	ENSG00000286655	lncRNA
ENSG00000288025.1	1.19883	3.06085	1.79663	1.70366	0.0884446	NA	ENSG00000288025	lncRNA
ENSG00000177464.5	4.72817	3.05979	1.45873	2.09756	0.0359437	0.151231	GPR4	protein_coding
ENSG00000271414.1	0.881601	3.05964	1.79901	1.70073	0.0889929	NA	ENSG00000271414	processed_pseudogene
ENSG00000259318.1	2.85358	3.05938	1.70466	1.79472	0.0726991	NA	HMGN1P1	processed_pseudogene
ENSG00000214415.4	2.01392	3.05874	1.79257	1.70635	0.0879438	NA	GNAT3	protein_coding
ENSG00000002745.13	4.22537	3.05595	1.50143	2.03536	0.0418144	0.168572	WNT16	protein_coding
ENSG00000261524.1	0.302015	3.05061	5.92019	0.51529	0.60635	NA	ABCB10P3	processed_pseudogene
ENSG00000138347	1.1823	3.04781	2.42706	1.25576	0.209202	NA	MYPN	protein_coding
ENSG00000237693	1.11812	3.04706	2.17939	1.39812	0.162076	NA	IRGM	protein_coding
ENSG00000259676.1	2.62674	3.0466	1.85743	1.64022	0.100959	NA	ENSG00000259676	lncRNA
ENSG00000125430.9	64.3337	3.04573	0.651443	4.67535	2.93451e-06	5.72963e-05	HS3ST3B1	protein_coding
ENSG00000267709.1	0.51999	3.04565	3.91447	0.778049	0.43654	NA	ENSG00000267709	lncRNA
ENSG00000261606.5	0.786258	3.0451	4.54896	0.669407	0.503236	NA	ENSG00000261606	lncRNA
ENSG00000224577	5.79024	3.04415	1.42894	2.13036	0.033142	0.142483	LINC01117	lncRNA
ENSG00000285314.1	3.62791	3.04359	4.54929	0.669025	0.503479	NA	ENSG00000285314	lncRNA
ENSG00000230928.1	0.517717	3.0435	2.97326	1.02363	0.306012	NA	ENSG00000230928	lncRNA
ENSG00000258967.1	0.260787	3.04077	5.92028	0.513619	0.607519	NA	HMGN1P3	processed_pseudogene
ENSG00000258084.6	17.7832	3.04014	1.52819	1.98938	0.0466593	0.182055	ENSG00000258084	lncRNA
ENSG00000185988.15	1.5148	3.03816	1.81565	1.67332	0.0942644	NA	PLK5	protein_coding
ENSG00000258660.1	0.517575	3.03177	5.92042	0.512087	0.60859	NA	ENSG00000258660	lncRNA
ENSG00000101115.13	10.9873	3.03132	1.02915	2.94547	0.00322469	0.0244989	SALL4	protein_coding
ENSG00000285976.2	1261.13	3.03011	0.959927	3.15661	0.00159616	0.0136866	ENSG00000285976	protein_coding
ENSG00000087245.13	545.854	3.02902	0.185127	16.3618	3.58186e-60	1.0368e-56	MMP2	protein_coding
ENSG00000184374.3	0.375116	3.02876	5.94382	0.509564	0.610357	NA	COLEC10	protein_coding
ENSG00000266642.2	3.03421	3.02867	1.43531	2.11011	0.0348487	NA	ENSG00000266642	lncRNA
ENSG00000148848.15	17.6626	3.02861	0.862272	3.51236	0.000444146	0.0047565	ADAM12	protein_coding
ENSG00000263873.1	61.7906	3.02445	0.823903	3.67088	0.000241714	0.00285409	THY1-AS1	lncRNA
ENSG00000260093.1	2.57721	3.02314	1.46933	2.0575	0.0396381	NA	MSRA-DT	lncRNA
ENSG00000182256.13	44.4837	3.02147	0.763717	3.95626	7.61316e-05	0.00104961	GABRG3	protein_coding
ENSG00000200959.1	1.55583	3.01391	1.72071	1.75155	0.0798519	NA	SNORA74A	snoRNA
ENSG00000134551.13	5.41841	3.01329	0.98852	3.04828	0.00230154	0.0185644	PRH2	protein_coding
ENSG00000274594.1	1.58272	3.01275	1.70373	1.76832	0.0770069	NA	ENSG00000274594	processed_pseudogene
ENSG00000264589	2.75933	3.00693	1.62736	1.84774	0.0646398	NA	MAPT-AS1	lncRNA
ENSG00000204179.11	1.53887	3.00668	1.78742	1.68214	0.0925424	NA	PTPN20	protein_coding
ENSG00000008323.16	0.977987	3.00564	2.68954	1.11753	0.263767	NA	PLEKHG6	protein_coding
ENSG00000280241.4	1.13134	3.00381	2.72135	1.10379	0.269682	NA	ENSG00000280241	lncRNA
ENSG00000267414.1	3.64932	3.00334	1.10856	2.70922	0.00674422	NA	SETBP1-DT	lncRNA
ENSG00000240086.7	11.0724	3.00285	1.29339	2.32169	0.0202496	0.100073	ENSG00000240086	lncRNA
ENSG00000162849.16	184.817	3.00197	0.263533	11.3912	4.62453e-30	1.87405e-27	KIF26B	protein_coding
ENSG00000161133	0.687665	2.99575	2.90599	1.03089	0.302593	NA	USP41	transcribed_unprocessed_pseudogene
ENSG00000286622.1	1.59139	2.99196	1.62861	1.83713	0.0661914	NA	ENSG00000286622	lncRNA
ENSG00000235010.1	2.39615	2.98939	1.49104	2.0049	0.0449738	NA	JAKMIP3-AS1	lncRNA
ENSG00000248472.8	1.72318	2.98882	1.78436	1.67501	0.0939327	NA	DDX11L9	transcribed_unprocessed_pseudogene
ENSG00000144649	102.656	2.98512	0.514026	5.80732	6.34798e-09	2.10857e-07	GASK1A	protein_coding
ENSG00000235790.7	1.32031	2.98277	1.78768	1.66851	0.0952136	NA	PEF1-AS1	lncRNA
ENSG00000155011.9	14.1934	2.98199	1.03117	2.89185	0.00382987	0.0281264	DKK2	protein_coding
ENSG00000153162.9	142.211	2.97497	0.284045	10.4736	1.14233e-25	3.56092e-23	BMP6	protein_coding
ENSG00000134201.12	1.07644	2.96515	2.71904	1.09051	0.275487	NA	GSTM5	protein_coding
ENSG00000163235.16	59.3644	2.96433	0.615658	4.8149	1.47274e-06	3.05745e-05	TGFA	protein_coding
ENSG00000279486.6	0.776407	2.96002	2.77445	1.06689	0.286023	NA	OR2AG1	protein_coding
ENSG00000206634.1	0.834883	2.95862	2.85832	1.03509	0.300626	NA	SNORA22	snoRNA
ENSG00000165125.22	2.26846	2.95706	1.74252	1.697	0.0896959	NA	TRPV6	protein_coding
ENSG00000108018.16	1.90161	2.95509	3.24517	0.910614	0.362499	NA	SORCS1	protein_coding
ENSG00000112964.14	92.9813	2.95464	0.647357	4.56416	5.01504e-06	9.37808e-05	GHR	protein_coding
ENSG00000213231.13	1.3633	2.95341	2.55643	1.15529	0.247973	NA	TCL1B	protein_coding
ENSG00000188643.11	6.09921	2.95335	1.19806	2.4651	0.0136975	0.0748286	S100A16	protein_coding
ENSG00000251600.8	0.726732	2.9531	2.81021	1.05085	0.293329	NA	ENSG00000251600	lncRNA
ENSG00000168874.13	35.1819	2.95207	0.605122	4.87848	1.06909e-06	2.27063e-05	ATOH8	protein_coding
ENSG00000147434.9	0.73297	2.94959	3.96309	0.744265	0.456716	NA	CHRNA6	protein_coding
ENSG00000115705.22	0.518637	2.94893	4.02487	0.732677	0.463755	NA	TPO	protein_coding
ENSG00000228115.1	0.520001	2.94085	3.51088	0.837638	0.402234	NA	ENSG00000228115	lncRNA
ENSG00000136931.10	55.2248	2.94018	0.572348	5.13705	2.79084e-07	6.7239e-06	NR5A1	protein_coding
ENSG00000148677.7	98.6764	2.93906	0.716179	4.10381	4.06407e-05	0.000605932	ANKRD1	protein_coding
ENSG00000260470.1	0.582173	2.93766	3.94824	0.744043	0.45685	NA	ENSG00000260470	lncRNA
ENSG00000181847.12	0.943882	2.93762	2.28574	1.28519	0.198724	NA	TIGIT	protein_coding
ENSG00000236297.1	1.73827	2.9344	2.09219	1.40255	0.160751	NA	EEF1A1P23	transcribed_processed_pseudogene
ENSG00000204872.4	0.612772	2.93164	4.64212	0.631531	0.527694	NA	NAT8B	protein_coding
ENSG00000116678.20	290.903	2.93152	0.209438	13.9971	1.62448e-44	2.53194e-41	LEPR	protein_coding
ENSG00000082497.12	80.4842	2.92223	0.474751	6.15528	7.49449e-10	2.9601e-08	SERTAD4	protein_coding
ENSG00000224945.1	2.55243	2.9208	1.44236	2.02501	0.0428663	NA	ENSG00000224945	lncRNA
ENSG00000188385	50.0537	2.91984	0.593349	4.92094	8.61294e-07	1.87048e-05	JAKMIP3	protein_coding
ENSG00000225950	5.5713	2.91978	1.21234	2.40838	0.0160233	0.0839359	NTF4	protein_coding
ENSG00000128564	475.692	2.91645	0.25412	11.4767	1.72796e-30	7.44933e-28	VGF	protein_coding
ENSG00000125675.20	4.53583	2.90868	1.36218	2.1353	0.0327362	0.141104	GRIA3	protein_coding
ENSG00000158089.15	475.596	2.90434	0.551226	5.26888	1.37255e-07	3.5609e-06	GALNT14	protein_coding
ENSG00000183090.5	7.47389	2.90002	1.02836	2.82004	0.00480174	0.033503	FREM3	protein_coding
ENSG00000283156.1	3.75926	2.89854	1.49785	1.93513	0.0529738	NA	ENSG00000283156	transcribed_unprocessed_pseudogene
ENSG00000275491.1	0.767115	2.894	2.76502	1.04665	0.295263	NA	LINC01730	lncRNA
ENSG00000277867.1	1.18976	2.89379	2.5095	1.15313	0.248856	NA	ENSG00000277867	processed_pseudogene
ENSG00000166926.9	1.59288	2.88932	2.19111	1.31865	0.187285	NA	MS4A6E	protein_coding
ENSG00000273950.1	0.99641	2.88929	2.24411	1.2875	0.19792	NA	Metazoa_SRP	misc_RNA
ENSG00000175264.8	20.5872	2.88801	0.745086	3.87607	0.000106156	0.00140035	CHST1	protein_coding
ENSG00000285650.1	2.90831	2.88423	1.26167	2.28605	0.0222515	NA	ENSG00000285650	lncRNA
ENSG00000250492.1	2.90666	2.88419	1.77128	1.6283	0.103461	NA	INTS6P1	processed_pseudogene
ENSG00000105467.9	1.55056	2.88384	1.91597	1.50515	0.132284	NA	SYNGR4	protein_coding
ENSG00000204982.3	1.89132	2.8792	1.73851	1.65614	0.0976944	NA	PRSS3P4	unprocessed_pseudogene
ENSG00000286232.1	0.682164	2.87839	3.23021	0.891086	0.372883	NA	ENSG00000286232	lncRNA
ENSG00000259151.2	1.87123	2.87809	1.61813	1.77865	0.0752979	NA	CAP2P1	transcribed_processed_pseudogene
ENSG00000280453.1	0.790325	2.87763	3.44612	0.835034	0.403699	NA	ENSG00000280453	TEC
ENSG00000116329	59.5074	2.87705	0.499785	5.75657	8.58395e-09	2.79627e-07	OPRD1	protein_coding
ENSG00000170615.15	0.671818	2.87407	3.48501	0.824693	0.409546	NA	SLC26A5	protein_coding
ENSG00000231189.1	2.35609	2.87234	1.55285	1.84972	0.064354	NA	ENSG00000231189	lncRNA
ENSG00000237410.1	1.61309	2.87197	1.61943	1.77344	0.0761559	NA	NRXN2-AS1	lncRNA
ENSG00000269400.1	0.594869	2.87147	2.66138	1.07894	0.280615	NA	ENSG00000269400	lncRNA
ENSG00000203437.3	0.323771	2.87115	5.92395	0.484668	0.627912	NA	ENSG00000203437	processed_pseudogene
ENSG00000182866	0.441229	2.87073	3.98957	0.719558	0.471797	NA	LCK	protein_coding
ENSG00000262999.1	1.27391	2.86935	2.02236	1.41881	0.155953	NA	ENSG00000262999	lncRNA
ENSG00000235272	1.01656	2.86778	2.00603	1.42958	0.152837	NA	RAMACL	protein_coding
ENSG00000160396.9	1.25981	2.86773	1.90002	1.50932	0.131218	NA	HIPK4	protein_coding
ENSG00000227619.3	1.60629	2.86772	1.96775	1.45736	0.145017	NA	ENSG00000227619	lncRNA
ENSG00000138316.11	5.92933	2.86374	1.42107	2.0152	0.0438834	0.17438	ADAMTS14	protein_coding
ENSG00000233469.1	1.23526	2.86278	1.94103	1.47487	0.140247	NA	ST6GALNAC4P1	processed_pseudogene
ENSG00000285722.1	4.66235	2.85941	1.27464	2.2433	0.0248775	0.11597	ENSG00000285722	lncRNA
ENSG00000159167.12	26.265	2.85905	0.842283	3.39441	0.000687771	0.00682449	STC1	protein_coding
ENSG00000277763.1	1.34951	2.85761	1.79656	1.5906	0.111699	NA	ENSG00000277763	lncRNA
ENSG00000197921.6	9.56965	2.85668	1.56099	1.83004	0.0672442	0.233433	HES5	protein_coding
ENSG00000183662	0.40693	2.85561	5.92406	0.482036	0.629781	NA	TAFA1	protein_coding
ENSG00000182667.15	0.469897	2.85541	4.72799	0.603937	0.545886	NA	NTM	protein_coding
ENSG00000223819.2	1.07372	2.85367	1.80151	1.58405	0.113183	NA	PPIAP89	processed_pseudogene
ENSG00000203805.11	68.0172	2.85283	0.440615	6.47464	9.50389e-11	4.46793e-09	PLPP4	protein_coding
ENSG00000250144.1	0.356673	2.84913	4.103	0.694403	0.48743	NA	EEF1A1P35	processed_pseudogene
ENSG00000233509.2	2.69349	2.84797	1.46974	1.93773	0.0526556	NA	ZNF197-AS1	lncRNA
ENSG00000286694.1	0.790311	2.84775	2.44357	1.16541	0.243855	NA	ENSG00000286694	lncRNA
ENSG00000265897.2	0.60963	2.84712	2.34944	1.21183	0.225577	NA	ENSG00000265897	processed_pseudogene
ENSG00000122432	5.85236	2.84693	0.905277	3.14482	0.00166191	0.0141605	SPATA1	protein_coding
ENSG00000287577.1	0.355884	2.84482	4.99437	0.569604	0.568946	NA	ENSG00000287577	lncRNA
ENSG00000275927.1	0.235585	2.84408	5.92465	0.480042	0.631198	NA	ENSG00000275927	lncRNA
ENSG00000232912.6	1.45006	2.84356	1.81369	1.56783	0.11692	NA	RERE-AS1	lncRNA
ENSG00000261826.1	1.21262	2.84279	1.86171	1.52698	0.126767	NA	ENSG00000261826	lncRNA
ENSG00000164556.7	0.817527	2.84212	2.68662	1.05788	0.290111	NA	FAM183BP	processed_pseudogene
ENSG00000242602.1	0.620426	2.8418	3.41669	0.83174	0.405556	NA	RPL35AP13	processed_pseudogene
ENSG00000286623.1	0.989679	2.84168	3.56893	0.796228	0.4259	NA	ENSG00000286623	lncRNA
ENSG00000232480	0.711207	2.84106	2.36879	1.19937	0.230384	NA	TGFB2-AS1	lncRNA
ENSG00000248079	2.42716	2.84045	1.81	1.56931	0.116576	NA	DPH6-DT	lncRNA
ENSG00000276740.1	0.682583	2.83976	4.3682	0.6501	0.515628	NA	ENSG00000276740	lncRNA
ENSG00000215571.5	0.970383	2.83801	2.06274	1.37585	0.168869	NA	GRK6P1	processed_pseudogene
ENSG00000249306	1.04938	2.83736	2.07639	1.36648	0.171787	NA	LINC01411	lncRNA
ENSG00000168993.15	460.594	2.83582	0.21022	13.4898	1.79636e-41	2.0221e-38	CPLX1	protein_coding
ENSG00000249767.1	0.854501	2.83576	2.41285	1.17528	0.239884	NA	ENPP7P10	unprocessed_pseudogene
ENSG00000119614.3	2.044	2.83522	1.59423	1.77843	0.0753335	NA	VSX2	protein_coding
ENSG00000230585.2	1.45055	2.83458	1.69633	1.67101	0.0947198	NA	PHB1P12	processed_pseudogene
ENSG00000257817.2	0.43347	2.83376	4.80547	0.589694	0.555396	NA	TBX3-AS1	lncRNA
ENSG00000183032.12	2.36129	2.82961	1.74415	1.62234	0.10473	NA	SLC25A21	protein_coding
ENSG00000227201.2	1.93381	2.82879	1.64584	1.71875	0.0856599	NA	CNN2P1	processed_pseudogene
ENSG00000129295	44.8871	2.82874	0.576818	4.90405	9.38802e-07	2.02147e-05	DNAAF11	protein_coding
ENSG00000162069.16	1.6898	2.82817	1.63702	1.72763	0.0840541	NA	BICDL2	protein_coding
ENSG00000135318.12	9.22502	2.8275	1.76831	1.59898	0.109825	0.319574	NT5E	protein_coding
ENSG00000229659.1	2.76124	2.8238	1.53333	1.84162	0.0655311	NA	RPL26P6	processed_pseudogene
ENSG00000267225.1	0.762239	2.8236	2.29028	1.23286	0.217626	NA	WDR7-OT1	lncRNA
ENSG00000268870.1	3.69554	2.82346	1.87581	1.5052	0.132274	NA	ENSG00000268870	protein_coding
ENSG00000223663.2	0.677117	2.82262	2.26201	1.24784	0.212091	NA	NDUFB4P8	processed_pseudogene
ENSG00000274021.1	55.2489	2.82262	0.446191	6.32603	2.51545e-10	1.07301e-08	ENSG00000274021	lncRNA
ENSG00000259254.1	0.802919	2.82155	2.03443	1.3869	0.165472	NA	ENSG00000259254	lncRNA
ENSG00000274080.1	0.935172	2.82044	2.00233	1.40858	0.15896	NA	ENSG00000274080	lncRNA
ENSG00000233902.1	0.224965	2.81908	5.92538	0.475763	0.634243	NA	ENSG00000233902	unprocessed_pseudogene
ENSG00000174417.3	1.0583	2.81897	2.15325	1.30917	0.190476	NA	TRHR	protein_coding
ENSG00000256712.1	0.602053	2.81879	2.40208	1.17348	0.240604	NA	ENSG00000256712	lncRNA
ENSG00000222898.1	0.52067	2.8186	2.93816	0.959307	0.337404	NA	RN7SKP97	misc_RNA
ENSG00000280266.1	0.350589	2.8177	5.0207	0.561216	0.57465	NA	ENSG00000280266	TEC
ENSG00000285871.1	0.874638	2.81745	2.63802	1.06801	0.285514	NA	ENSG00000285871	lncRNA
ENSG00000236018.2	0.475304	2.817	2.92569	0.962852	0.335622	NA	ENSG00000236018	processed_pseudogene
ENSG00000168754.15	2.02248	2.81679	1.7687	1.59257	0.111256	NA	FAM178B	protein_coding
ENSG00000260305.1	0.18859	2.81659	5.92545	0.475339	0.634546	NA	NTRK3-AS1	lncRNA
ENSG00000269119.1	0.644457	2.81649	2.03534	1.3838	0.166421	NA	HNRNPA1P52	processed_pseudogene
ENSG00000254339	1.30557	2.81602	1.94021	1.4514	0.146668	NA	ENSG00000254339	lncRNA
ENSG00000180178.11	6.52479	2.81526	1.49023	1.88915	0.0588724	0.213585	FAR2P1	transcribed_unprocessed_pseudogene
ENSG00000273965.1	0.356166	2.81501	4.12619	0.68223	0.495093	NA	ENSG00000273965	lncRNA
ENSG00000286012.1	9.08349	2.81451	1.28417	2.19169	0.0284019	0.127884	ENSG00000286012	TEC
ENSG00000257851.2	0.6488	2.81403	2.5377	1.10889	0.267478	NA	HNRNPA3P10	processed_pseudogene
ENSG00000254180.2	1.03892	2.81372	2.36686	1.1888	0.234519	NA	ENSG00000254180	lncRNA
ENSG00000157150.5	0.357899	2.81237	4.09555	0.68669	0.492278	NA	TIMP4	protein_coding
ENSG00000259055.1	0.532013	2.81123	3.26051	0.862205	0.388575	NA	ENSG00000259055	lncRNA
ENSG00000268081	0.353302	2.80972	4.11656	0.68254	0.494897	NA	ENSG00000268081	lncRNA
ENSG00000235979.9	1.62157	2.8092	1.80966	1.55234	0.120582	NA	ENSG00000235979	lncRNA
ENSG00000274833.1	0.878548	2.80823	2.3375	1.20138	0.229603	NA	ENSG00000274833	lncRNA
ENSG00000100314.4	42.8729	2.80783	0.370132	7.58603	3.29866e-14	2.63139e-12	CABP7	protein_coding
ENSG00000241345.1	3.15713	2.80717	1.55028	1.81075	0.0701795	NA	ENSG00000241345	lncRNA
ENSG00000076356.7	153.282	2.80546	0.439949	6.37678	1.80848e-10	7.89907e-09	PLXNA2	protein_coding
ENSG00000236641.2	1.79509	2.8033	1.94458	1.44159	0.149418	NA	ENSG00000236641	lncRNA
ENSG00000167617.3	3.48709	2.80163	1.75237	1.59877	0.109872	NA	CDC42EP5	protein_coding
ENSG00000231426.7	0.315439	2.79881	5.07516	0.551473	0.581309	NA	FILNC1	lncRNA
ENSG00000030304	0.681795	2.79869	3.06676	0.91259	0.361458	NA	MUSK	protein_coding
ENSG00000255523.1	0.666798	2.79286	3.51642	0.794233	0.42706	NA	ENSG00000255523	lncRNA
ENSG00000270000.1	0.856676	2.79181	2.26844	1.23072	0.218429	NA	ENSG00000270000	lncRNA
ENSG00000259424	2.30153	2.79053	1.97406	1.4136	0.15748	NA	IRAIN	lncRNA
ENSG00000263167.1	0.340882	2.79019	5.08034	0.549214	0.582858	NA	ENSG00000263167	lncRNA
ENSG00000227267.3	0.434813	2.78948	5.9182	0.47134	0.637398	NA	ENSG00000227267	processed_pseudogene
ENSG00000189030.10	1.22738	2.78919	2.1298	1.3096	0.190331	NA	VHLL	protein_coding
ENSG00000259910.1	1.06998	2.78828	2.31972	1.20199	0.229367	NA	ENSG00000259910	lncRNA
ENSG00000260838.3	2.57664	2.78801	2.4487	1.13857	0.254883	NA	ENSG00000260838	lncRNA
ENSG00000233107.1	0.349805	2.78712	5.92623	0.470302	0.63814	NA	SUCLA2P2	processed_pseudogene
ENSG00000213976.4	0.262551	2.78654	5.92625	0.470203	0.63821	NA	ENSG00000213976	unprocessed_pseudogene
ENSG00000229052.2	1.48812	2.78596	2.23255	1.24788	0.212073	NA	ENSG00000229052	transcribed_processed_pseudogene
ENSG00000205502.4	0.7197	2.78591	2.47889	1.12385	0.261075	NA	C2CD4B	protein_coding
ENSG00000260555.1	0.92408	2.78535	2.88173	0.966554	0.333767	NA	ENSG00000260555	lncRNA
ENSG00000266853.1	0.22522	2.78445	5.92628	0.469848	0.638464	NA	ITM2BP1	processed_pseudogene
ENSG00000235086.1	0.352682	2.78352	5.045	0.551738	0.581128	NA	FNDC1-IT1	lncRNA
ENSG00000275140.1	0.220172	2.78351	5.9263	0.469687	0.638578	NA	SEC22B3P	unprocessed_pseudogene
ENSG00000249504.3	0.460815	2.78259	5.92631	0.469533	0.638689	NA	PCDHA14	transcribed_unprocessed_pseudogene
ENSG00000264449.6	0.72445	2.78254	5.2705	0.527946	0.597537	NA	ENSG00000264449	lncRNA
ENSG00000240180.1	0.184003	2.78205	5.92632	0.469439	0.638756	NA	RPL12P28	processed_pseudogene
ENSG00000225670.4	0.861978	2.78166	4.15296	0.669801	0.502984	NA	CADM3-AS1	lncRNA
ENSG00000283743.2	0.636968	2.78037	5.92634	0.469155	0.638959	NA	ENSG00000283743	lncRNA
ENSG00000239626.1	0.64806	2.78012	2.98776	0.930506	0.352109	NA	RPSAP41	processed_pseudogene
ENSG00000144119.4	0.571308	2.78001	5.92635	0.469093	0.639003	NA	C1QL2	protein_coding
ENSG00000250111.3	1.22259	2.77919	5.92636	0.468954	0.639103	NA	ENSG00000250111	unprocessed_pseudogene
ENSG00000011347.10	194.206	2.77875	0.297872	9.32867	1.0721e-20	1.95702e-18	SYT7	protein_coding
ENSG00000276532.1	0.273663	2.77796	5.92635	0.468748	0.63925	NA	Metazoa_SRP	misc_RNA
ENSG00000244349.1	0.430056	2.77734	5.92639	0.468639	0.639327	NA	ENSG00000244349	lncRNA
ENSG00000225760.2	0.522609	2.77686	3.50175	0.792992	0.427783	NA	LINC00431	transcribed_unprocessed_pseudogene
ENSG00000005421.9	1.81887	2.77496	2.37901	1.16643	0.243439	NA	PON1	protein_coding
ENSG00000145824.13	1884.89	2.7739	0.457365	6.06495	1.31999e-09	5.01793e-08	CXCL14	protein_coding
ENSG00000278860.1	0.675879	2.77336	3.58329	0.773971	0.438948	NA	ENSG00000278860	TEC
ENSG00000215221.2	0.611365	2.77291	5.5938	0.495712	0.620097	NA	UBA52P6	transcribed_processed_pseudogene
ENSG00000231852.9	1.62433	2.76812	2.1723	1.27428	0.202565	NA	CYP21A2	protein_coding
ENSG00000176136.6	5.52233	2.7663	1.12308	2.46315	0.0137724	0.0750353	MC5R	protein_coding
ENSG00000232040.4	0.435426	2.76103	4.12001	0.670152	0.502761	NA	ZBED9	protein_coding
ENSG00000281904.1	4.50537	2.75833	1.09488	2.51929	0.0117592	0.0668493	ENSG00000281904	lncRNA
ENSG00000130635.16	40.9744	2.75519	1.33539	2.06322	0.0390919	0.160633	COL5A1	protein_coding
ENSG00000249077.1	1.06221	2.74965	1.89094	1.45412	0.145914	NA	ENSG00000249077	processed_pseudogene
ENSG00000287856.1	3.71364	2.74823	3.03851	0.904468	0.365748	NA	ENSG00000287856	protein_coding
ENSG00000271327.1	2.65071	2.746	1.65185	1.66238	0.0964376	NA	ENSG00000271327	lncRNA
ENSG00000196639.7	14.0614	2.74557	0.704004	3.89993	9.62216e-05	0.00128604	HRH1	protein_coding
ENSG00000134363.12	49.5369	2.74395	0.590643	4.6457	3.38933e-06	6.55292e-05	FST	protein_coding
ENSG00000269125.1	2.25279	2.74392	1.57161	1.74592	0.0808246	NA	ENSG00000269125	lncRNA
ENSG00000131771.14	0.498762	2.74199	3.49575	0.784378	0.432818	NA	PPP1R1B	protein_coding
ENSG00000223834.5	1.1489	2.73949	2.57901	1.06222	0.288134	NA	ENSG00000223834	lncRNA
ENSG00000131142.14	1.55664	2.73829	1.65213	1.65744	0.0974313	NA	CCL25	protein_coding
ENSG00000275484.1	1.1864	2.73789	1.7987	1.52214	0.127973	NA	ENSG00000275484	lncRNA
ENSG00000252192.1	1.79224	2.73761	3.44456	0.794763	0.426751	NA	ENSG00000252192	snoRNA
ENSG00000277501.1	1.84149	2.73095	1.88468	1.44902	0.147331	NA	ENSG00000277501	lncRNA
ENSG00000154162.15	5.14543	2.73027	1.51535	1.80175	0.0715846	0.244223	CDH12	protein_coding
ENSG00000286787	2.53133	2.72654	1.9391	1.40609	0.159698	NA	ENSG00000286787	lncRNA
ENSG00000166923.12	46.0099	2.72327	2.01628	1.35064	0.176811	0.428841	GREM1	protein_coding
ENSG00000080573.7	3.85605	2.72262	1.47445	1.84654	0.0648143	NA	COL5A3	protein_coding
ENSG00000277870.5	1.12919	2.72244	1.69461	1.60653	0.108158	NA	FAM230A	lncRNA
ENSG00000229544.9	100.593	2.7223	0.278198	9.78548	1.29973e-22	2.77211e-20	NKX1-2	protein_coding
ENSG00000236989.5	2.13743	2.72172	1.72802	1.57505	0.115245	NA	ENSG00000236989	lncRNA
ENSG00000228352.2	2.62548	2.71916	1.46674	1.85388	0.0637558	NA	ENSG00000228352	lncRNA
ENSG00000267568.6	1.96217	2.71838	1.68235	1.61582	0.106133	NA	ENSG00000267568	lncRNA
ENSG00000268434.5	0.810273	2.71814	2.23905	1.21397	0.224759	NA	ENSG00000268434	protein_coding
ENSG00000229433.2	0.822173	2.715	2.4648	1.10151	0.270675	NA	LINC02069	lncRNA
ENSG00000228812	0.307806	2.71389	5.92913	0.457722	0.647152	NA	LAMA5-AS1	lncRNA
ENSG00000198795.11	114.288	2.71297	0.957829	2.83242	0.00461974	0.032547	ZNF521	protein_coding
ENSG00000144619.15	55.5216	2.71203	0.451394	6.00812	1.8769e-09	6.91451e-08	CNTN4	protein_coding
ENSG00000216901.1	2.71197	2.71007	1.46016	1.85601	0.0634525	NA	ZNF603P	unprocessed_pseudogene
ENSG00000223855	7.8107	2.70995	0.88924	3.04749	0.00230761	0.0185986	PDGFA-DT	lncRNA
ENSG00000275322.1	4.3959	2.7063	1.40525	1.92584	0.0541243	0.201334	ENSG00000275322	lncRNA
ENSG00000272699.1	1.63871	2.70468	1.43453	1.88541	0.059374	NA	ENSG00000272699	lncRNA
ENSG00000285329.1	0.949012	2.703	3.61827	0.747041	0.455039	NA	ENSG00000285329	protein_coding
ENSG00000240395.1	1.4947	2.70213	1.76079	1.53461	0.124879	NA	RPL5P23	processed_pseudogene
ENSG00000224407.1	1.58156	2.70042	1.84871	1.46071	0.144096	NA	ENSG00000224407	lncRNA
ENSG00000101276.18	0.853989	2.69976	2.41727	1.11686	0.264053	NA	SLC52A3	protein_coding
ENSG00000250295.6	7.11411	2.69969	1.05505	2.55883	0.0105024	0.0609726	RDH10-AS1	lncRNA
ENSG00000234492	3.97009	2.69642	1.11314	2.42235	0.0154207	0.0817086	RPL34-DT	lncRNA
ENSG00000188064.10	158.737	2.69599	0.230529	11.6948	1.35479e-31	6.23881e-29	WNT7B	protein_coding
ENSG00000206113.11	5.50322	2.69162	1.28515	2.09439	0.036225	0.151931	CFAP99	protein_coding
ENSG00000262662.1	0.544007	2.68609	4.63734	0.57923	0.562434	NA	ENSG00000262662	lncRNA
ENSG00000233791	1.0569	2.68562	3.08173	0.871464	0.383501	NA	BTG2-DT	lncRNA
ENSG00000229154.2	5.87297	2.68284	0.966654	2.77539	0.00551351	0.0372631	KCNQ5-AS1	lncRNA
ENSG00000102935.12	121.861	2.67917	0.28474	9.40921	4.99888e-21	9.37845e-19	ZNF423	protein_coding
ENSG00000132031.13	0.867223	2.67857	3.10789	0.861861	0.388764	NA	MATN3	protein_coding
ENSG00000279249	11.7816	2.67448	0.737864	3.62463	0.000289375	0.00332011	ENSG00000279249	lncRNA
ENSG00000184809.13	2.21751	2.6692	1.56687	1.70353	0.0884698	NA	B3GALT5-AS1	lncRNA
ENSG00000203999	4.91196	2.66856	1.44207	1.8505	0.064241	0.226729	LINC01270	lncRNA
ENSG00000253492.1	5.60009	2.66792	1.51697	1.75871	0.0786263	0.25934	CDH12P3	unprocessed_pseudogene
ENSG00000187922.14	1.29914	2.66223	2.1172	1.25743	0.208598	NA	LCN10	protein_coding
ENSG00000134398.15	0.992038	2.65818	3.10032	0.857387	0.391231	NA	ERN2	protein_coding
ENSG00000229563.7	3.48309	2.65801	1.72669	1.53937	0.123715	NA	LINC01204	lncRNA
ENSG00000075673.12	6.24653	2.65667	1.23575	2.14984	0.0315678	0.137784	ATP12A	protein_coding
ENSG00000101898	2.93082	2.65477	2.13135	1.24558	0.212919	NA	MCTS2	protein_coding
ENSG00000287337.1	0.877143	2.65034	2.19522	1.20732	0.227308	NA	ENSG00000287337	lncRNA
ENSG00000287185.1	0.743165	2.65026	2.11457	1.25334	0.210083	NA	ENSG00000287185	lncRNA
ENSG00000141338	0.937028	2.64989	2.6829	0.987694	0.323303	NA	ABCA8	protein_coding
ENSG00000271949.1	0.369068	2.64726	5.93013	0.446409	0.655302	NA	ENSG00000271949	protein_coding
ENSG00000101331.17	27.0418	2.64649	0.528384	5.00865	5.48136e-07	1.2465e-05	CCM2L	protein_coding
ENSG00000215452.5	0.307839	2.64244	5.93278	0.445396	0.656034	NA	ZNF663P	transcribed_unitary_pseudogene
ENSG00000145794.17	1.05827	2.64222	2.48977	1.06123	0.288586	NA	MEGF10	protein_coding
ENSG00000170421	40.4316	2.64208	0.626626	4.21635	2.48283e-05	0.00039028	KRT8	protein_coding
ENSG00000231130.1	0.208457	2.64067	5.93024	0.445288	0.656112	NA	HLA-T	unprocessed_pseudogene
ENSG00000235597	0.495455	2.6397	4.71983	0.559279	0.575971	NA	LINC01102	lncRNA
ENSG00000139352.4	170.11	2.63795	0.405786	6.50083	7.98771e-11	3.83524e-09	ASCL1	protein_coding
ENSG00000170608.3	14.6498	2.62989	0.822382	3.19789	0.00138437	0.0121904	FOXA3	protein_coding
ENSG00000232798.1	0.541671	2.62659	5.8161	0.451607	0.651552	NA	ENSG00000232798	processed_pseudogene
ENSG00000287276.1	2.78414	2.62568	1.57603	1.66601	0.0957108	NA	CNTNAP3P7	transcribed_unprocessed_pseudogene
ENSG00000251623	1.11736	2.62523	3.16247	0.830119	0.406472	NA	ENSG00000251623	transcribed_processed_pseudogene
ENSG00000232131.1	0.165472	2.62422	5.93054	0.442493	0.658132	NA	NCOA7-AS1	lncRNA
ENSG00000240128.1	0.165472	2.62422	5.93054	0.442493	0.658132	NA	KRT18P43	processed_pseudogene
ENSG00000241114.1	0.165472	2.62422	5.93054	0.442493	0.658132	NA	ENSG00000241114	processed_pseudogene
ENSG00000254710.2	0.165472	2.62422	5.93054	0.442493	0.658132	NA	ENSG00000254710	lncRNA
ENSG00000261757.1	0.165472	2.62422	5.93054	0.442493	0.658132	NA	ENSG00000261757	lncRNA
ENSG00000262869.1	0.165472	2.62422	5.93054	0.442493	0.658132	NA	ENSG00000262869	lncRNA
ENSG00000251019.1	0.165472	2.62422	5.93054	0.442493	0.658132	NA	HIGD1AP13	processed_pseudogene
ENSG00000137727.13	82.7772	2.62357	0.3902	6.72366	1.77217e-11	9.54992e-10	ARHGAP20	protein_coding
ENSG00000121440.15	18.6917	2.62307	0.668625	3.92307	8.74264e-05	0.00118017	PDZRN3	protein_coding
ENSG00000181518.4	0.205814	2.6228	5.93056	0.442251	0.658308	NA	OR8D4	protein_coding
ENSG00000269547.1	0.288406	2.62228	5.93057	0.442163	0.658371	NA	ENSG00000269547	protein_coding
ENSG00000144596.13	93.2491	2.62182	0.417273	6.28322	3.31636e-10	1.39122e-08	GRIP2	protein_coding
ENSG00000261667.2	0.590299	2.62075	5.9306	0.441903	0.658559	NA	LY6L	protein_coding
ENSG00000251380.3	0.827673	2.62001	5.33663	0.490949	0.623462	NA	DCANP1	protein_coding
ENSG00000271974.1	0.390638	2.61709	5.93228	0.44116	0.659097	NA	RDM1P4	transcribed_processed_pseudogene
ENSG00000288634.1	0.488416	2.61202	5.93076	0.440419	0.659633	NA	ENSG00000288634	protein_coding
ENSG00000280299.1	1.22154	2.6109	2.88519	0.904933	0.365501	NA	ENSG00000280299	lncRNA
ENSG00000143631.11	1.47638	2.60842	2.63786	0.98884	0.322741	NA	FLG	protein_coding
ENSG00000121764	1.80579	2.60413	1.77424	1.46774	0.142174	NA	HCRTR1	protein_coding
ENSG00000197322.4	3.54282	2.60405	1.07197	2.42923	0.0151311	NA	TMEM132E-DT	lncRNA
ENSG00000134438.10	12.5184	2.5999	0.891443	2.9165	0.00353979	0.0263601	RAX	protein_coding
ENSG00000139318.8	145.288	2.58948	0.33394	7.75433	8.88135e-15	7.65761e-13	DUSP6	protein_coding
ENSG00000260628	1.29165	2.58843	2.43461	1.06318	0.2877	NA	ENSG00000260628	transcribed_unprocessed_pseudogene
ENSG00000249241	1.81209	2.58824	2.08032	1.24415	0.213444	NA	LINC02265	lncRNA
ENSG00000224928.2	1.27984	2.586	2.06616	1.2516	0.210717	NA	KRT8P30	processed_pseudogene
ENSG00000286333.1	0.279502	2.58533	5.93167	0.435852	0.662944	NA	ENSG00000286333	lncRNA
ENSG00000161973.11	0.80641	2.58105	2.43529	1.05985	0.289212	NA	CCDC42	protein_coding
ENSG00000171303	0.444752	2.58088	4.08061	0.632475	0.527077	NA	KCNK3	protein_coding
ENSG00000260412.1	16.8131	2.57977	0.71446	3.61079	0.000305265	0.00347879	ENSG00000260412	lncRNA
ENSG00000163958.14	1.00604	2.57848	2.29776	1.12217	0.261789	NA	ZDHHC19	protein_coding
ENSG00000183298.5	1.82932	2.57748	1.67746	1.53654	0.124406	NA	RPSAP19	processed_pseudogene
ENSG00000107295.10	111.309	2.57696	0.421982	6.1068	1.01645e-09	3.91547e-08	SH3GL2	protein_coding
ENSG00000233343.1	0.254095	2.57628	5.93175	0.434321	0.664056	NA	ATP6V1G1P4	processed_pseudogene
ENSG00000228330.1	0.501615	2.57408	3.44945	0.74623	0.455528	NA	ENSG00000228330	processed_pseudogene
ENSG00000139193.4	1.8447	2.57399	1.55439	1.65595	0.0977329	NA	CD27	protein_coding
ENSG00000271415.1	0.435156	2.57305	4.13125	0.622826	0.533399	NA	RPL23AP90	processed_pseudogene
ENSG00000125954.13	27.2798	2.57266	0.923443	2.78594	0.00533722	0.0363422	CHURC1-FNTB	protein_coding
ENSG00000232374.5	0.349187	2.57254	5.93182	0.433685	0.664517	NA	GPR79	processed_pseudogene
ENSG00000151952.16	0.195406	2.57149	5.93316	0.43341	0.664717	NA	TMEM132D	protein_coding
ENSG00000211772.11	0.676575	2.57123	5.14585	0.49967	0.617307	NA	TRBC2	TR_C_gene
ENSG00000256232.1	0.691218	2.571	2.82667	0.909551	0.363059	NA	LINC02387	lncRNA
ENSG00000182132.14	19.5958	2.57084	0.895432	2.87106	0.00409093	0.0296992	KCNIP1	protein_coding
ENSG00000267535.2	0.813018	2.57051	2.70765	0.949351	0.342442	NA	LINC00868	lncRNA
ENSG00000260235.1	0.460449	2.56995	4.83412	0.531627	0.594984	NA	ENSG00000260235	lncRNA
ENSG00000267631.5	1.19946	2.56975	2.18373	1.17677	0.239286	NA	CGB1	protein_coding
ENSG00000250101.1	0.68656	2.56909	2.9978	0.85699	0.391451	NA	ENSG00000250101	lncRNA
ENSG00000257935	0.409657	2.56843	4.89498	0.524707	0.599787	NA	LHX5-AS1	lncRNA
ENSG00000188959.10	0.938707	2.56839	2.38085	1.07877	0.28069	NA	C9orf152	protein_coding
ENSG00000213578.6	2.30642	2.56789	1.5231	1.68596	0.0918027	NA	CPLX3	protein_coding
ENSG00000105509.11	0.5165	2.56657	3.0417	0.843795	0.398784	NA	HAS1	protein_coding
ENSG00000249464	1.89269	2.56572	1.75001	1.46612	0.142616	NA	LINC01091	lncRNA
ENSG00000261040	0.937562	2.56561	2.32222	1.10481	0.269243	NA	WFDC21P	transcribed_unitary_pseudogene
ENSG00000152591.15	0.480291	2.56017	3.81798	0.670555	0.502504	NA	DSPP	protein_coding
ENSG00000257759.2	0.953446	2.55962	2.19204	1.16769	0.242933	NA	ENSG00000257759	lncRNA
ENSG00000204173.11	3.49659	2.55951	1.26238	2.02752	0.0426089	NA	LRRC37A5P	transcribed_unprocessed_pseudogene
ENSG00000283380.1	0.157978	2.55853	5.93272	0.431258	0.666281	NA	ENSG00000283380	lncRNA
ENSG00000274629.1	0.494743	2.55849	5.77756	0.442832	0.657887	NA	ENSG00000274629	lncRNA
ENSG00000269944.1	0.83093	2.55722	2.27566	1.12373	0.261129	NA	ENSG00000269944	lncRNA
ENSG00000274993.1	1.13101	2.55631	1.94164	1.31657	0.187983	NA	ENSG00000274993	lncRNA
ENSG00000142178.9	3.01575	2.5563	2.45605	1.04082	0.29796	NA	SIK1	protein_coding
ENSG00000184005.11	64.0907	2.55615	0.742945	3.44056	0.00058051	0.00596163	ST6GALNAC3	protein_coding
ENSG00000283959	1.89014	2.55595	1.66197	1.5379	0.124073	NA	ENSG00000283959	lncRNA
ENSG00000124302.13	81.4857	2.5559	0.641863	3.982	6.83382e-05	0.000959576	CHST8	protein_coding
ENSG00000168481.9	110.989	2.55503	0.270221	9.45533	3.21994e-21	6.15494e-19	LGI3	protein_coding
ENSG00000181036.14	0.348717	2.55469	4.20604	0.607386	0.543595	NA	FCRL6	protein_coding
ENSG00000119411.11	21.5695	2.5527	0.507881	5.02618	5.00355e-07	1.15535e-05	BSPRY	protein_coding
ENSG00000115353.11	14.6487	2.55204	1.20403	2.11958	0.0340418	0.145365	TACR1	protein_coding
ENSG00000280037.1	1.15374	2.54912	2.02662	1.25782	0.208457	NA	ENSG00000280037	TEC
ENSG00000223668.1	1.35134	2.54869	1.75569	1.45167	0.146593	NA	EEF1A1P24	processed_pseudogene
ENSG00000259398.1	0.727155	2.54676	3.27313	0.778083	0.43652	NA	ENSG00000259398	lncRNA
ENSG00000258045.2	1.51357	2.54514	1.80807	1.40765	0.159234	NA	Metazoa_SRP	misc_RNA
ENSG00000282390.1	0.400069	2.54331	4.90988	0.517998	0.604459	NA	ENSG00000282390	lncRNA
ENSG00000274569.1	1.1669	2.54286	1.71424	1.48338	0.137974	NA	ENSG00000274569	processed_pseudogene
ENSG00000279734.1	0.395273	2.54229	4.97463	0.511051	0.609315	NA	ENSG00000279734	TEC
ENSG00000247213.7	1.06159	2.54151	2.67263	0.950937	0.341636	NA	LINC01498	lncRNA
ENSG00000287843.1	2.90031	2.54135	1.45545	1.7461	0.0807939	NA	ENSG00000287843	lncRNA
ENSG00000244239.1	2.93839	2.54115	1.69128	1.5025	0.132967	NA	ICA1-AS1	lncRNA
ENSG00000229672.3	0.240871	2.54085	5.93288	0.428266	0.668457	NA	ENSG00000229672	lncRNA
ENSG00000250892.1	0.890182	2.54025	2.32179	1.09409	0.273915	NA	ENSG00000250892	unprocessed_pseudogene
ENSG00000225779.1	0.24201	2.53989	5.93289	0.428103	0.668576	NA	ENSG00000225779	processed_pseudogene
ENSG00000287177.1	1.05013	2.53905	2.81964	0.900485	0.367862	NA	ENSG00000287177	lncRNA
ENSG00000214185.3	0.445848	2.53828	4.01294	0.632525	0.527044	NA	XPOTP1	processed_pseudogene
ENSG00000287642	2.36186	2.53805	1.64244	1.5453	0.122275	NA	ENSG00000287642	lncRNA
ENSG00000259470.2	0.446895	2.53794	4.87811	0.520271	0.602875	NA	KRT8P9	processed_pseudogene
ENSG00000240991.3	0.710125	2.53787	2.22878	1.13868	0.254835	NA	RPL23AP67	processed_pseudogene
ENSG00000124092.13	22.439	2.5377	0.821062	3.09075	0.00199651	0.0165048	CTCFL	protein_coding
ENSG00000275144.1	0.59052	2.53713	2.61459	0.970375	0.33186	NA	SNX18P5	unprocessed_pseudogene
ENSG00000224545.1	0.197868	2.53706	5.93293	0.427624	0.668925	NA	ENSG00000224545	processed_pseudogene
ENSG00000266980.1	2.06555	2.53694	1.49001	1.70263	0.0886366	NA	ENSG00000266980	lncRNA
ENSG00000235619.1	0.398692	2.53627	3.52083	0.720362	0.471302	NA	RPL36AP33	processed_pseudogene
ENSG00000275091.1	0.785499	2.53517	2.351	1.07834	0.280884	NA	ENSG00000275091	lncRNA
ENSG00000196781.16	334.178	2.53341	0.321671	7.87578	3.3861e-15	3.10449e-13	TLE1	protein_coding
ENSG00000250731.1	1.16653	2.53305	2.81829	0.898789	0.368765	NA	TPM3P6	processed_pseudogene
ENSG00000139767.10	2.82051	2.53224	1.94604	1.30123	0.193181	NA	SRRM4	protein_coding
ENSG00000257864.1	0.500537	2.53196	3.03188	0.835111	0.403655	NA	ENSG00000257864	processed_pseudogene
ENSG00000108511.10	24.9541	2.53055	0.970832	2.60658	0.00914512	0.0550664	HOXB6	protein_coding
ENSG00000233728.1	1.3328	2.52984	3.16481	0.799364	0.42408	NA	ENSG00000233728	lncRNA
ENSG00000287512.1	0.777522	2.52898	2.45593	1.02975	0.303129	NA	ENSG00000287512	lncRNA
ENSG00000241782.1	1.02402	2.52894	2.78408	0.908357	0.36369	NA	ENSG00000241782	processed_pseudogene
ENSG00000143850.16	41.8044	2.52778	0.793985	3.18366	0.00145424	0.0127063	PLEKHA6	protein_coding
ENSG00000254653.1	0.611665	2.52759	3.4934	0.723534	0.469352	NA	ENSG00000254653	lncRNA
ENSG00000232587.1	1.54569	2.52722	1.96265	1.28765	0.197866	NA	EEF1A1P3	processed_pseudogene
ENSG00000146555	179.656	2.5257	0.478638	5.27686	1.31414e-07	3.42691e-06	SDK1	protein_coding
ENSG00000226761.3	1.93878	2.52553	1.66834	1.5138	0.130077	NA	TAS2R46	protein_coding
ENSG00000257910.1	0.830995	2.52494	2.69125	0.938204	0.34814	NA	ENSG00000257910	lncRNA
ENSG00000279357.1	0.66625	2.52133	2.59025	0.973393	0.330358	NA	ENSG00000279357	TEC
ENSG00000251301	0.595244	2.5201	3.09421	0.814454	0.415385	NA	LINC02384	lncRNA
ENSG00000174521	1.9366	2.51983	1.90257	1.32444	0.185358	NA	TTC9B	protein_coding
ENSG00000165828.15	1.02562	2.51783	3.62605	0.694373	0.487448	NA	PRAP1	protein_coding
ENSG00000135925.9	8.59795	2.51756	1.04169	2.4168	0.0156576	0.0824984	WNT10A	protein_coding
ENSG00000144130	0.865588	2.51739	2.70425	0.930902	0.351904	NA	NT5DC4	protein_coding
ENSG00000175832.13	218.597	2.51458	0.255856	9.82809	8.52212e-23	1.89753e-20	ETV4	protein_coding
ENSG00000278012.1	0.191141	2.51156	5.93408	0.423243	0.672118	NA	ENSG00000278012	lncRNA
ENSG00000258945	0.509952	2.5091	5.82515	0.430736	0.66666	NA	ENSG00000258945	lncRNA
ENSG00000224546.2	1.26706	2.50789	1.82165	1.37671	0.168601	NA	EIF4BP3	processed_pseudogene
ENSG00000285844.2	8.17552	2.50627	0.875971	2.86113	0.00422128	0.0304708	KCNQ5-DT	lncRNA
ENSG00000109956.13	362.482	2.50548	0.210164	11.9215	9.14195e-33	4.63086e-30	B3GAT1	protein_coding
ENSG00000101292.8	0.516899	2.50526	3.24827	0.77126	0.440553	NA	PROKR2	protein_coding
ENSG00000073282.14	6.70963	2.50509	1.01771	2.46149	0.0138362	0.0753424	TP63	protein_coding
ENSG00000266605.1	1.84059	2.50496	2.06803	1.21128	0.225789	NA	LONRF2P1	processed_pseudogene
ENSG00000280228.1	0.849212	2.50491	1.99323	1.25671	0.208859	NA	ENSG00000280228	TEC
ENSG00000214711.10	0.743448	2.50447	1.99642	1.25448	0.209667	NA	CAPN14	protein_coding
ENSG00000149090	1.22804	2.50446	2.24518	1.11548	0.264643	NA	PAMR1	protein_coding
ENSG00000151789.12	167.249	2.50446	0.395491	6.33254	2.41152e-10	1.03741e-08	ZNF385D	protein_coding
ENSG00000203573.4	0.193444	2.50385	5.93405	0.421946	0.673065	NA	Metazoa_SRP	misc_RNA
ENSG00000225415.2	0.151808	2.50343	5.93409	0.421872	0.673118	NA	ACKR4P1	processed_pseudogene
ENSG00000135625.8	1.37546	2.50327	2.07716	1.20514	0.228149	NA	EGR4	protein_coding
ENSG00000233421.5	1.26019	2.50318	2.08885	1.19835	0.230779	NA	LINC01783	lncRNA
ENSG00000271021.1	0.853565	2.50301	2.45941	1.01773	0.308807	NA	ENSG00000271021	processed_pseudogene
ENSG00000241537.1	0.864479	2.50298	2.35791	1.06153	0.288451	NA	ENSG00000241537	processed_pseudogene
ENSG00000270829.1	0.151741	2.50281	5.9341	0.421767	0.673195	NA	ENSG00000270829	lncRNA
ENSG00000198049.7	0.471773	2.50256	2.7356	0.91481	0.360291	NA	AVPR1B	protein_coding
ENSG00000174407	0.844777	2.50244	2.59193	0.965474	0.334308	NA	MIR1-1HG	lncRNA
ENSG00000256473.1	0.270223	2.50213	5.93408	0.421654	0.673278	NA	ENSG00000256473	lncRNA
ENSG00000249055.1	0.315115	2.50188	4.25349	0.588194	0.556402	NA	TBCAP3	transcribed_processed_pseudogene
ENSG00000162975.5	79.9372	2.50118	0.273527	9.14418	6.00859e-20	9.89806e-18	KCNF1	protein_coding
ENSG00000266111.2	0.48528	2.50085	3.41369	0.732593	0.463807	NA	ENSG00000266111	lncRNA
ENSG00000225857.5	0.622128	2.50039	3.91511	0.638651	0.52305	NA	LINC02816	lncRNA
ENSG00000212464.1	0.720217	2.50029	2.4409	1.02433	0.30568	NA	SNORA12	snoRNA
ENSG00000239542.3	1.0117	2.49858	2.39259	1.0443	0.296347	NA	RN7SL399P	misc_RNA
ENSG00000258420.1	1.5773	2.49822	2.04478	1.22175	0.221801	NA	LONRF2P3	processed_pseudogene
ENSG00000251513.2	0.882469	2.4982	2.45269	1.01855	0.308415	NA	LIX1-AS1	lncRNA
ENSG00000197993.9	1.55901	2.49816	2.48976	1.00337	0.31568	NA	KEL	protein_coding
ENSG00000286123.1	0.791687	2.49743	2.21891	1.12552	0.260369	NA	ENSG00000286123	lncRNA
ENSG00000175920.18	9.88308	2.49727	0.828144	3.0155	0.00256553	0.0203996	DOK7	protein_coding
ENSG00000225067.4	2.1254	2.49708	1.7113	1.45917	0.144519	NA	RPL23AP2	processed_pseudogene
ENSG00000240541.3	0.353106	2.49693	4.17347	0.598286	0.549649	NA	TM4SF1-AS1	lncRNA
ENSG00000255342.1	0.194819	2.49681	5.93412	0.420755	0.673934	NA	ENSG00000255342	processed_pseudogene
ENSG00000268231.1	0.966315	2.49675	2.30669	1.0824	0.279077	NA	ENSG00000268231	lncRNA
ENSG00000259892.1	0.502854	2.49635	2.66082	0.938191	0.348146	NA	ENSG00000259892	unprocessed_pseudogene
ENSG00000272733.1	2.73595	2.49489	1.43523	1.73832	0.082154	NA	ENSG00000272733	lncRNA
ENSG00000280431.1	0.605299	2.49471	3.06849	0.813011	0.416212	NA	ENSG00000280431	TEC
ENSG00000269976.1	0.312368	2.49467	5.12844	0.486438	0.626657	NA	ENSG00000269976	lncRNA
ENSG00000230914.3	0.464995	2.49417	3.52722	0.707121	0.479491	NA	KIF19BP	transcribed_unitary_pseudogene
ENSG00000279509.1	0.774967	2.49309	2.76636	0.901216	0.367473	NA	ENSG00000279509	TEC
ENSG00000224269.1	0.608761	2.49153	2.42043	1.02937	0.303304	NA	ENSG00000224269	lncRNA
ENSG00000243498.2	0.309405	2.49119	5.14259	0.484422	0.628086	NA	UBA52P5	processed_pseudogene
ENSG00000153823.19	80.9053	2.49113	0.566246	4.39938	1.08563e-05	0.000187687	PID1	protein_coding
ENSG00000287502.1	0.957792	2.48814	2.54314	0.978372	0.32789	NA	ENSG00000287502	lncRNA
ENSG00000126583.12	44.8139	2.48813	0.398915	6.23725	4.45318e-10	1.82652e-08	PRKCG	protein_coding
ENSG00000260584.1	0.313506	2.48734	5.93421	0.419152	0.675105	NA	ENSG00000260584	processed_pseudogene
ENSG00000236528	4.98039	2.48719	1.60974	1.54509	0.122325	0.343671	ENSG00000236528	lncRNA
ENSG00000183034.13	0.868038	2.48695	2.85072	0.872394	0.382994	NA	OTOP2	protein_coding
ENSG00000235726.7	0.152079	2.48682	5.93813	0.418788	0.675371	NA	ENSG00000235726	lncRNA
ENSG00000284837.1	1.23756	2.48549	1.70979	1.45368	0.146036	NA	ENSG00000284837	lncRNA
ENSG00000253308.2	1.50555	2.4846	1.78838	1.3893	0.164742	NA	ENSG00000253308	lncRNA
ENSG00000283663.1	2.30787	2.48341	1.76927	1.40364	0.160427	NA	ENSG00000283663	protein_coding
ENSG00000108375.13	53.4998	2.48268	0.620034	4.00411	6.22519e-05	0.000889509	RNF43	protein_coding
ENSG00000286235.1	6.08052	2.48266	1.66869	1.48779	0.136806	0.367986	ENSG00000286235	protein_coding
ENSG00000236360.2	0.307266	2.47854	5.93505	0.41761	0.676232	NA	RRAS2P1	processed_pseudogene
ENSG00000258044.1	1.01973	2.4781	2.03437	1.21812	0.22318	NA	ENSG00000258044	lncRNA
ENSG00000169885.10	3.27652	2.47694	1.60767	1.54071	0.123388	NA	CALML6	protein_coding
ENSG00000256988.2	0.310524	2.47658	5.9351	0.417277	0.676476	NA	ENSG00000256988	lncRNA
ENSG00000177234.7	2.79932	2.47556	1.31944	1.87622	0.0606255	NA	LINC01561	lncRNA
ENSG00000232218.1	1.42359	2.47549	1.93182	1.28143	0.200043	NA	ENSG00000232218	unprocessed_pseudogene
ENSG00000272372.1	4.1876	2.47544	1.28509	1.92628	0.054069	0.201242	ENSG00000272372	lncRNA
ENSG00000238258.1	1.81811	2.47536	1.92542	1.28562	0.198576	NA	ENSG00000238258	lncRNA
ENSG00000259612.1	0.808352	2.47223	2.10372	1.17517	0.239927	NA	EEF1A1P22	processed_pseudogene
ENSG00000234203.1	0.693939	2.47185	2.98007	0.82946	0.406844	NA	ENSG00000234203	lncRNA
ENSG00000267107	1.63963	2.47139	1.74866	1.4133	0.157567	NA	PCAT19	lncRNA
ENSG00000206828.1	0.731688	2.47069	2.54503	0.97079	0.331653	NA	RNVU1-30	snRNA
ENSG00000232204.1	0.792515	2.47065	2.39306	1.03242	0.301874	NA	TET1P1	processed_pseudogene
ENSG00000198077.11	0.567142	2.46971	4.64964	0.531161	0.595307	NA	CYP2A7	protein_coding
ENSG00000261888.1	4.00744	2.46957	1.22369	2.01813	0.043578	0.173454	ENSG00000261888	lncRNA
ENSG00000274823.1	0.309887	2.46944	5.93525	0.416063	0.677364	NA	APONP	processed_pseudogene
ENSG00000268015.1	0.479071	2.46832	3.04241	0.811305	0.417191	NA	ENSG00000268015	lncRNA
ENSG00000215893.3	0.481968	2.46825	4.9076	0.502945	0.615003	NA	RPL23AP17	processed_pseudogene
ENSG00000223814.1	0.924816	2.46814	2.59027	0.952851	0.340666	NA	ENSG00000223814	lncRNA
ENSG00000265666.1	0.856056	2.46762	2.48519	0.992929	0.320745	NA	RARA-AS1	lncRNA
ENSG00000279390.1	1.03668	2.46728	2.59803	0.949673	0.342278	NA	ENSG00000279390	TEC
ENSG00000269444.1	0.755492	2.4669	2.50759	0.983772	0.325228	NA	ENSG00000269444	lncRNA
ENSG00000234175.1	0.930855	2.4664	2.30925	1.06805	0.285497	NA	ENSG00000234175	processed_pseudogene
ENSG00000255201.1	1.03949	2.46605	2.6914	0.91627	0.359525	NA	ENSG00000255201	lncRNA
ENSG00000171450.6	23.0861	2.46539	0.595728	4.13845	3.49664e-05	0.000532699	CDK5R2	protein_coding
ENSG00000224621.1	0.406805	2.46466	5.93535	0.415251	0.677958	NA	ENSG00000224621	lncRNA
ENSG00000269463.1	0.608831	2.46457	2.51985	0.978061	0.328044	NA	ENSG00000269463	lncRNA
ENSG00000273342.1	0.482628	2.4641	3.93426	0.626318	0.531106	NA	ENSG00000273342	lncRNA
ENSG00000184185.10	240.478	2.4638	0.149997	16.4257	1.25254e-60	4.22983e-57	KCNJ12	protein_coding
ENSG00000259941.1	1.98592	2.46329	2.92433	0.842343	0.399596	NA	ENSG00000259941	lncRNA
ENSG00000224464.2	0.18333	2.46301	5.93542	0.414968	0.678165	NA	PGAM1P6	processed_pseudogene
ENSG00000288054.1	0.188837	2.46292	5.9354	0.414954	0.678175	NA	ENSG00000288054	lncRNA
ENSG00000188859.7	72.976	2.46284	0.586929	4.19615	2.71494e-05	0.000424461	FAM78B	protein_coding
ENSG00000258507.1	0.438189	2.46253	5.93539	0.41489	0.678223	NA	ENSG00000258507	lncRNA
ENSG00000235635.1	0.609729	2.46218	3.02276	0.814549	0.415331	NA	ENSG00000235635	lncRNA
ENSG00000268545.1	0.437933	2.46168	3.49429	0.704488	0.481129	NA	VN1R107P	unprocessed_pseudogene
ENSG00000243710.8	5.71527	2.46086	1.22542	2.00817	0.044625	0.176428	CFAP57	protein_coding
ENSG00000279694.1	5.73217	2.46079	1.00953	2.43756	0.0147867	0.0789687	ENSG00000279694	TEC
ENSG00000243627.5	0.147113	2.45961	5.93545	0.414394	0.678586	NA	SMIM34	protein_coding
ENSG00000229308.1	0.189036	2.45923	5.93545	0.414329	0.678633	NA	ENSG00000229308	lncRNA
ENSG00000216990.2	0.688236	2.45923	3.3932	0.724751	0.468605	NA	HSPD1P10	processed_pseudogene
ENSG00000287687.2	0.431847	2.45915	4.93395	0.498415	0.618192	NA	ENSG00000287687	lncRNA
ENSG00000229807.13	2.64564	2.45914	1.55045	1.58608	0.112722	NA	XIST	lncRNA
ENSG00000269072	0.230028	2.45913	5.93545	0.414313	0.678645	NA	ENSG00000269072	lncRNA
ENSG00000222164.1	0.347195	2.45873	5.93546	0.414244	0.678695	NA	RN7SKP266	misc_RNA
ENSG00000286078.1	0.396944	2.45849	5.93547	0.414202	0.678726	NA	ENSG00000286078	lncRNA
ENSG00000261728.1	5.18615	2.45813	1.24936	1.96752	0.0491235	0.188547	ENSG00000261728	lncRNA
ENSG00000176716.5	3.2857	2.45752	1.45541	1.68855	0.091306	NA	OR10AB1P	transcribed_unprocessed_pseudogene
ENSG00000242634.1	0.186331	2.4573	5.9355	0.414	0.678874	NA	RPS24P16	processed_pseudogene
ENSG00000246379.8	8.90189	2.45521	1.03499	2.3722	0.0176825	0.0904528	GNAO1-DT	lncRNA
ENSG00000254630.1	0.187262	2.45506	5.93554	0.41362	0.679152	NA	ENSG00000254630	lncRNA
ENSG00000002746.15	14.526	2.45472	1.07303	2.28766	0.0221573	0.106995	HECW1	protein_coding
ENSG00000180221.6	0.379819	2.45426	4.16145	0.589762	0.55535	NA	TPT1P10	processed_pseudogene
ENSG00000237990.3	0.355612	2.45413	5.05713	0.485282	0.627476	NA	CNTN4-AS1	lncRNA
ENSG00000233081.1	0.442495	2.4538	4.02162	0.610153	0.54176	NA	ENSG00000233081	lncRNA
ENSG00000257307.1	0.356755	2.45285	5.93552	0.41325	0.679424	NA	ENSG00000257307	processed_pseudogene
ENSG00000215184.2	0.273803	2.45221	5.93555	0.413139	0.679504	NA	RPS12P16	processed_pseudogene
ENSG00000267463.1	0.268023	2.45188	5.93554	0.413084	0.679545	NA	UBE2V2P2	processed_pseudogene
ENSG00000100362.13	1.84172	2.44985	2.16549	1.13132	0.257922	NA	PVALB	protein_coding
ENSG00000170890.14	0.765982	2.44709	2.69081	0.909427	0.363125	NA	PLA2G1B	protein_coding
ENSG00000070748.19	5.06177	2.44393	2.05903	1.18693	0.235254	0.507368	CHAT	protein_coding
ENSG00000270472.3	0.30932	2.44316	5.9358	0.411598	0.680634	NA	IGHV3OR16-9	IG_V_gene
ENSG00000138944.8	315.981	2.44297	0.213781	11.4274	3.05e-30	1.28748e-27	SHISAL1	protein_coding
ENSG00000256458.1	0.399506	2.44059	5.93585	0.411162	0.680954	NA	ENSG00000256458	lncRNA
ENSG00000251604.1	3.13948	2.44031	1.35413	1.80212	0.0715264	NA	LINC01385	lncRNA
ENSG00000257514.5	5.35638	2.43728	0.973779	2.5029	0.0123179	0.0690799	ENSG00000257514	lncRNA
ENSG00000213178.3	3.89878	2.43719	1.52323	1.60001	0.109596	NA	RPL22P1	processed_pseudogene
ENSG00000259002.2	0.779178	2.4353	3.44655	0.706591	0.479821	NA	ENSG00000259002	lncRNA
ENSG00000276975.3	2.19098	2.43318	2.35234	1.03437	0.300964	NA	HYDIN2	transcribed_unprocessed_pseudogene
ENSG00000226194	1.00696	2.43151	2.67108	0.910311	0.362659	NA	LINC02519	lncRNA
ENSG00000015592	0.822281	2.43004	2.14521	1.13278	0.257308	NA	STMN4	protein_coding
ENSG00000135905	190.486	2.42689	0.738887	3.28451	0.00102158	0.00954326	DOCK10	protein_coding
ENSG00000204338.8	1.47936	2.42526	2.04639	1.18514	0.235962	NA	CYP21A1P	transcribed_unprocessed_pseudogene
ENSG00000100626.17	345.475	2.42445	0.242055	10.0161	1.29451e-23	3.2382e-21	GALNT16	protein_coding
ENSG00000178033.6	148.44	2.4219	0.355203	6.81835	9.20923e-12	5.22682e-10	CALHM5	protein_coding
ENSG00000164220.7	1.43506	2.41882	1.9493	1.24087	0.214655	NA	F2RL2	protein_coding
ENSG00000285367	1.03669	2.41816	1.94799	1.24136	0.214472	NA	ENSG00000285367	lncRNA
ENSG00000165810.17	117.751	2.41728	0.244682	9.8793	5.11882e-23	1.17861e-20	BTNL9	protein_coding
ENSG00000145920.15	15.9131	2.41486	1.31341	1.83863	0.0659698	0.230578	CPLX2	protein_coding
ENSG00000232354.8	1.76334	2.41304	1.72633	1.39778	0.162178	NA	VIPR1-AS1	lncRNA
ENSG00000213088.12	0.584939	2.41286	3.2476	0.742967	0.457502	NA	ACKR1	protein_coding
ENSG00000184261.5	25.4145	2.41008	0.809408	2.97759	0.00290528	0.0225457	KCNK12	protein_coding
ENSG00000189143.10	4.81109	2.40709	1.04605	2.30112	0.0213848	0.104208	CLDN4	protein_coding
ENSG00000196091.15	24.2833	2.40663	0.708317	3.39767	0.000679622	0.00677349	MYBPC1	protein_coding
ENSG00000198185	0.876212	2.40512	2.27933	1.05519	0.291339	NA	ZNF334	protein_coding
ENSG00000149970.16	90.1301	2.40175	0.62033	3.87173	0.000108066	0.00142184	CNKSR2	protein_coding
ENSG00000107242.20	113.159	2.39926	0.478864	5.01031	5.43413e-07	1.23715e-05	PIP5K1B	protein_coding
ENSG00000123453	10.0491	2.39897	1.19798	2.00251	0.0452296	0.17786	SARDH	protein_coding
ENSG00000164451	28.8335	2.3989	0.65776	3.64708	0.000265237	0.00308686	CALHM4	protein_coding
ENSG00000233818.1	0.266377	2.39501	5.93685	0.403414	0.686644	NA	CLDN14-AS1	lncRNA
ENSG00000184564.11	4.44709	2.3946	1.86252	1.28567	0.198557	0.45827	SLITRK6	protein_coding
ENSG00000260493.1	2.61842	2.39086	1.5409	1.5516	0.120758	NA	E2F5-DT	lncRNA
ENSG00000236062.1	0.880633	2.38879	2.56796	0.930229	0.352253	NA	GSTM5P1	processed_pseudogene
ENSG00000162947.5	0.215816	2.38311	5.94209	0.401055	0.68838	NA	LINC01931	lncRNA
ENSG00000163673	19.7307	2.38222	0.951006	2.50495	0.0122469	0.0687559	DCLK3	protein_coding
ENSG00000273980.1	1.24317	2.38006	1.58473	1.50187	0.133131	NA	ENSG00000273980	lncRNA
ENSG00000261173	1.48625	2.37472	1.65166	1.43777	0.150498	NA	DNAJA2-DT	lncRNA
ENSG00000266278.1	0.74034	2.37467	2.31083	1.02763	0.304126	NA	LINC01910	lncRNA
ENSG00000254349.6	2.35005	2.37339	1.80008	1.31849	0.18734	NA	MIR2052HG	lncRNA
ENSG00000242337	2.11443	2.37272	1.88607	1.25803	0.208383	NA	INHCAP	transcribed_unprocessed_pseudogene
ENSG00000215529	1.40564	2.36845	1.91764	1.23508	0.2168	NA	EFCAB8	protein_coding
ENSG00000225213.2	1.66319	2.36825	1.79449	1.31973	0.186924	NA	ENSG00000225213	lncRNA
ENSG00000280711.1	1.50343	2.36761	1.96402	1.20549	0.228013	NA	JADRR	lncRNA
ENSG00000186212.4	25.9568	2.36535	0.430014	5.50063	3.78445e-08	1.10491e-06	SOWAHB	protein_coding
ENSG00000244459	2.61769	2.36332	1.49334	1.58257	0.113519	NA	ENSG00000244459	lncRNA
ENSG00000154027.19	32.1688	2.35765	0.93851	2.51212	0.0120007	0.0679026	AK5	protein_coding
ENSG00000212766.9	0.694443	2.35698	3.52393	0.668848	0.503592	NA	EWSAT1	lncRNA
ENSG00000265888	0.907167	2.35696	3.00241	0.785022	0.432441	NA	DSCAS	lncRNA
ENSG00000255670.1	1.25254	2.35357	1.87127	1.25774	0.208487	NA	ENSG00000255670	lncRNA
ENSG00000279317	2.07851	2.35318	1.97828	1.18951	0.234241	NA	ENSG00000279317	lncRNA
ENSG00000243517.1	2.54891	2.352	1.39624	1.68453	0.0920801	NA	ENSG00000243517	processed_pseudogene
ENSG00000183347.15	3.46298	2.35142	1.27301	1.84713	0.064729	NA	GBP6	protein_coding
ENSG00000101448.14	1.4854	2.35127	1.69398	1.38801	0.165133	NA	EPPIN	protein_coding
ENSG00000277301.1	2.44795	2.35043	1.30792	1.79707	0.072324	NA	ENSG00000277301	lncRNA
ENSG00000075461.6	88.4995	2.34667	0.351236	6.68117	2.37037e-11	1.23467e-09	CACNG4	protein_coding
ENSG00000262560.1	2.83531	2.34609	1.86624	1.25712	0.208709	NA	ENSG00000262560	protein_coding
ENSG00000261787.2	72.2135	2.34267	0.332144	7.05317	1.74893e-12	1.09036e-10	TCF24	protein_coding
ENSG00000148082.10	13.3577	2.3416	0.746387	3.13725	0.00170541	0.0144946	SHC3	protein_coding
ENSG00000286032.1	7.30841	2.34153	0.872269	2.68442	0.00726567	0.0461062	ENSG00000286032	TEC
ENSG00000260071.2	0.30718	2.34064	5.94828	0.393498	0.693952	NA	ENSG00000260071	lncRNA
ENSG00000235934.2	12.6953	2.33969	1.00943	2.31783	0.0204585	0.100834	ENSG00000235934	lncRNA
ENSG00000258038.6	1.4721	2.33962	1.92646	1.21446	0.224571	NA	LINC02327	lncRNA
ENSG00000287493.1	2.14823	2.33817	1.4893	1.56998	0.116421	NA	ENSG00000287493	lncRNA
ENSG00000285791.1	1.76355	2.33664	3.1316	0.746148	0.455578	NA	ENSG00000285791	protein_coding
ENSG00000267412.1	1.14613	2.33601	1.82173	1.2823	0.199736	NA	ENSG00000267412	lncRNA
ENSG00000144550	1.29041	2.33598	1.91574	1.21936	0.222708	NA	CPNE9	protein_coding
ENSG00000185499	70.7705	2.33258	0.585721	3.98241	6.82206e-05	0.00095859	MUC1	protein_coding
ENSG00000255026.1	5.44533	2.33249	1.10999	2.10136	0.0356092	0.150356	ENSG00000255026	lncRNA
ENSG00000228261.1	0.908256	2.33145	2.07736	1.12231	0.261729	NA	ITPRIP-AS1	lncRNA
ENSG00000277423.1	1.37036	2.33012	2.15778	1.07987	0.2802	NA	ENSG00000277423	lncRNA
ENSG00000027075	148.213	2.32985	0.395846	5.88576	3.96237e-09	1.3654e-07	PRKCH	protein_coding
ENSG00000221866	8.30115	2.32964	1.36155	1.71102	0.0870783	0.276635	PLXNA4	protein_coding
ENSG00000269980.1	1.73378	2.32668	1.58306	1.46973	0.141634	NA	ENSG00000269980	lncRNA
ENSG00000076344.16	4.54723	2.3266	1.61515	1.44049	0.14973	0.38747	RGS11	protein_coding
ENSG00000129170.10	1.42205	2.32572	1.6853	1.38	0.167586	NA	CSRP3	protein_coding
ENSG00000205181	4.10787	2.32479	1.08564	2.14141	0.0322413	0.139737	LINC00654	lncRNA
ENSG00000285633.1	2.08788	2.32269	1.70233	1.36442	0.172436	NA	ENSG00000285633	lncRNA
ENSG00000266248.1	0.804181	2.32037	2.6629	0.87137	0.383552	NA	ENSG00000266248	lncRNA
ENSG00000227365.1	1.50283	2.31925	1.76542	1.31371	0.188943	NA	ENSG00000227365	lncRNA
ENSG00000237276	2.34204	2.31865	1.78828	1.29659	0.194774	NA	ANO7L1	transcribed_unprocessed_pseudogene
ENSG00000135127	114.647	2.31842	0.429468	5.39835	6.72563e-08	1.84155e-06	BICDL1	protein_coding
ENSG00000115896.16	26.8544	2.31801	0.607089	3.81824	0.000134405	0.00172144	PLCL1	protein_coding
ENSG00000184709.7	18.2423	2.31725	0.680381	3.4058	0.000659696	0.0066074	LRRC26	protein_coding
ENSG00000120051.15	3.03769	2.31601	1.46296	1.58311	0.113397	NA	CFAP58	protein_coding
ENSG00000267750.6	13.1208	2.31473	0.871733	2.65532	0.00792342	0.0492468	RUNDC3A-AS1	lncRNA
ENSG00000257660.5	0.989488	2.31445	1.73727	1.33223	0.182783	NA	ADCY6-DT	lncRNA
ENSG00000161132.6	3.78947	2.31403	1.20195	1.92523	0.0542006	NA	ENSG00000161132	unprocessed_pseudogene
ENSG00000263257.3	1.25111	2.31315	2.10779	1.09743	0.272454	NA	ENSG00000263257	lncRNA
ENSG00000173557.15	1.84796	2.31179	1.85806	1.2442	0.213427	NA	FAM166C	protein_coding
ENSG00000169894.18	105.402	2.31129	0.447716	5.16239	2.43813e-07	6.0026e-06	MUC3A	protein_coding
ENSG00000146374.14	15.6794	2.3107	0.713699	3.23763	0.00120526	0.0109217	RSPO3	protein_coding
ENSG00000248027.1	1.00965	2.31056	2.44045	0.946776	0.343753	NA	ARHGAP42-AS1	lncRNA
ENSG00000264860.1	1.77733	2.30665	1.62906	1.41594	0.156792	NA	ENSG00000264860	lncRNA
ENSG00000232727.2	0.466867	2.30527	3.92577	0.587214	0.55706	NA	YWHAEP1	processed_pseudogene
ENSG00000137809.17	42.0304	2.30385	0.706065	3.26294	0.00110262	0.0101413	ITGA11	protein_coding
ENSG00000179869.15	74.681	2.29999	0.651053	3.53273	0.000411299	0.0044661	ABCA13	protein_coding
ENSG00000287038	32.8347	2.29639	0.408225	5.6253	1.85185e-08	5.66801e-07	ENSG00000287038	lncRNA
ENSG00000267053	1.07667	2.29618	2.43535	0.942856	0.345755	NA	ENSG00000267053	lncRNA
ENSG00000245857	1.71898	2.29429	1.95968	1.17075	0.241699	NA	GS1-24F4.2	lncRNA
ENSG00000105695.15	0.765831	2.2911	2.7016	0.848055	0.396407	NA	MAG	protein_coding
ENSG00000203740.4	4.0645	2.28904	1.48676	1.53962	0.123654	0.345938	NTMT2	protein_coding
ENSG00000175170.16	5.87365	2.28734	1.18755	1.92609	0.0540927	0.201254	FAM182B	lncRNA
ENSG00000261509	2.48	2.28726	2.12478	1.07647	0.281718	NA	TP53TG3B	protein_coding
ENSG00000173482.17	191.118	2.28276	0.209904	10.8752	1.51243e-27	5.57181e-25	PTPRM	protein_coding
ENSG00000154319.16	31.5433	2.2806	0.435627	5.23521	1.64797e-07	4.2321e-06	FAM167A	protein_coding
ENSG00000225339.4	11.1437	2.27997	1.04668	2.17829	0.0293841	0.131084	ENSG00000225339	lncRNA
ENSG00000261456.6	6.31357	2.27846	1.01332	2.2485	0.0245441	0.114932	TUBB8	protein_coding
ENSG00000267745.1	13.4545	2.2778	0.742169	3.06912	0.00214693	0.017562	ENSG00000267745	lncRNA
ENSG00000164741.15	181.69	2.27749	0.404407	5.63168	1.78463e-08	5.47881e-07	DLC1	protein_coding
ENSG00000188505.5	68.7913	2.27579	0.418809	5.43396	5.51166e-08	1.54892e-06	NCCRP1	protein_coding
ENSG00000264423.2	3.93613	2.27563	1.37856	1.65074	0.0987923	0.299476	RN7SL718P	misc_RNA
ENSG00000204475.10	0.532392	2.27212	3.54723	0.640532	0.521827	NA	NCR3	protein_coding
ENSG00000166148.4	7.71669	2.27014	0.888725	2.55438	0.0106376	0.0615824	AVPR1A	protein_coding
ENSG00000188508.11	1.24899	2.26887	2.11659	1.07195	0.283742	NA	KRTDAP	protein_coding
ENSG00000286134.2	0.520533	2.26798	3.94525	0.574862	0.565385	NA	ENSG00000286134	lncRNA
ENSG00000175164.16	0.424641	2.26743	5.94479	0.381415	0.702895	NA	ABO	protein_coding
ENSG00000135547.9	21.2194	2.26293	0.459755	4.92203	8.5653e-07	1.86213e-05	HEY2	protein_coding
ENSG00000231329.8	1.22167	2.25997	1.78413	1.26671	0.20526	NA	ENSG00000231329	lncRNA
ENSG00000163075.13	7.38465	2.25784	1.13122	1.99593	0.0459419	0.180046	CFAP221	protein_coding
ENSG00000286271	1.42018	2.25651	1.68373	1.34018	0.180185	NA	ENSG00000286271	lncRNA
ENSG00000147655.12	5.6982	2.25484	1.71293	1.31636	0.188053	0.444145	RSPO2	protein_coding
ENSG00000116183.11	0.88265	2.25469	2.19859	1.02552	0.30512	NA	PAPPA2	protein_coding
ENSG00000151617.17	178.131	2.25436	0.250243	9.0087	2.08507e-19	3.12945e-17	EDNRA	protein_coding
ENSG00000131378.14	156.366	2.25232	0.256583	8.77813	1.66216e-18	2.23037e-16	RFTN1	protein_coding
ENSG00000122733.12	10.8356	2.25178	0.872624	2.58047	0.00986662	0.0582687	PHF24	protein_coding
ENSG00000100433.16	18.4749	2.2504	1.13586	1.98123	0.047566	0.1844	KCNK10	protein_coding
ENSG00000187288.12	0.329267	2.24837	5.9465	0.378099	0.705357	NA	CIDEC	protein_coding
ENSG00000253671.3	2.81884	2.24459	1.53799	1.45943	0.144446	NA	ENSG00000253671	lncRNA
ENSG00000128052.10	17.9946	2.24413	0.708112	3.16918	0.00152872	0.0132541	KDR	protein_coding
ENSG00000205882	0.874646	2.24379	2.73238	0.821185	0.411541	NA	DEFB134	protein_coding
ENSG00000143340	72.1092	2.24298	0.335337	6.68872	2.25125e-11	1.1848e-09	FAM163A	protein_coding
ENSG00000230894.2	0.705623	2.24037	3.39327	0.660238	0.509101	NA	ENSG00000230894	lncRNA
ENSG00000124731.13	0.951678	2.23981	2.89043	0.774906	0.438395	NA	TREM1	protein_coding
ENSG00000273450.1	1.29998	2.23778	1.97228	1.13461	0.256537	NA	ENSG00000273450	lncRNA
ENSG00000255910.2	0.771542	2.23524	2.66161	0.839807	0.401016	NA	ENSG00000255910	lncRNA
ENSG00000112539.15	11.4752	2.23415	0.93013	2.40198	0.0163066	0.0850464	C6orf118	protein_coding
ENSG00000248476.1	2.76765	2.23355	1.16391	1.91901	0.0549836	NA	BACH1-IT1	lncRNA
ENSG00000102271.14	6.1038	2.23349	1.3573	1.64554	0.0998585	0.30154	KLHL4	protein_coding
ENSG00000226953.8	0.417381	2.23289	3.65394	0.611093	0.541138	NA	NCKAP5-AS2	lncRNA
ENSG00000226125.2	1.15112	2.23079	2.50738	0.889691	0.373632	NA	LINC01907	lncRNA
ENSG00000259692.6	3.92549	2.22498	1.19835	1.85671	0.063352	0.224373	ENSG00000259692	lncRNA
ENSG00000256564.1	1.49657	2.22482	1.46524	1.5184	0.128914	NA	ENSG00000256564	lncRNA
ENSG00000270480.1	2.14199	2.22415	1.48324	1.49952	0.133739	NA	ENSG00000270480	processed_pseudogene
ENSG00000243695.1	1.59666	2.22394	2.05319	1.08316	0.278738	NA	ENSG00000243695	processed_pseudogene
ENSG00000226917.6	1.00401	2.22012	2.18871	1.01435	0.310414	NA	LINC01276	lncRNA
ENSG00000185974.7	0.914961	2.2201	2.45104	0.905779	0.365053	NA	GRK1	protein_coding
ENSG00000204869	12.086	2.21522	0.70532	3.14073	0.00168526	0.0143534	IGFL4	protein_coding
ENSG00000204653.10	2.45796	2.21516	1.49258	1.48412	0.137777	NA	ASPDH	protein_coding
ENSG00000254031.6	0.150236	2.21182	5.95613	0.371352	0.710376	NA	ENSG00000254031	lncRNA
ENSG00000256280.1	0.251766	2.21121	5.94406	0.372004	0.70989	NA	ATP5MGP1	processed_pseudogene
ENSG00000266378.1	0.163408	2.21106	5.94406	0.371978	0.709909	NA	ENSG00000266378	lncRNA
ENSG00000230778.2	1.42625	2.20982	1.42587	1.54981	0.121188	NA	ANKRD63	protein_coding
ENSG00000262558.1	0.160219	2.20939	5.9441	0.371695	0.71012	NA	ENSG00000262558	lncRNA
ENSG00000148826.9	0.20894	2.20932	5.9441	0.371682	0.710129	NA	NKX6-2	protein_coding
ENSG00000170788.14	0.449136	2.20826	4.88769	0.451801	0.651412	NA	DYDC1	protein_coding
ENSG00000228151.1	0.124104	2.20815	5.94413	0.371484	0.710277	NA	ENSG00000228151	lncRNA
ENSG00000182898.4	0.124104	2.20815	5.94413	0.371484	0.710277	NA	TCHHL1	protein_coding
ENSG00000224340.1	0.124104	2.20815	5.94413	0.371484	0.710277	NA	ENSG00000224340	processed_pseudogene
ENSG00000265415.1	0.124104	2.20815	5.94413	0.371484	0.710277	NA	ENSG00000265415	lncRNA
ENSG00000267286.1	0.124104	2.20815	5.94413	0.371484	0.710277	NA	ENSG00000267286	lncRNA
ENSG00000272703.1	0.124104	2.20815	5.94413	0.371484	0.710277	NA	ENSG00000272703	lncRNA
ENSG00000276993.1	0.124104	2.20815	5.94413	0.371484	0.710277	NA	ENSG00000276993	lncRNA
ENSG00000284479.1	0.124104	2.20815	5.94413	0.371484	0.710277	NA	SMIM39	protein_coding
ENSG00000227704	0.124104	2.20815	5.94413	0.371484	0.710277	NA	ENSG00000227704	lncRNA
ENSG00000185837	0.24578	2.20813	5.93562	0.372014	0.709883	NA	HDHD5-AS1	lncRNA
ENSG00000256977	2.68435	2.20584	1.40318	1.57203	0.115943	NA	LIMS3	protein_coding
ENSG00000283392.1	0.164955	2.20566	5.94419	0.371062	0.710591	NA	ENSG00000283392	lncRNA
ENSG00000186790.6	0.207842	2.20512	5.9442	0.37097	0.71066	NA	FOXE3	protein_coding
ENSG00000160716.6	29.7442	2.20438	0.5601	3.93569	8.29568e-05	0.00112886	CHRNB2	protein_coding
ENSG00000285810.1	0.211151	2.20306	5.94425	0.37062	0.710921	NA	ENSG00000285810	lncRNA
ENSG00000131400.8	2.12527	2.20262	2.07054	1.06379	0.287423	NA	NAPSA	protein_coding
ENSG00000122641.11	12.1347	2.20237	0.982682	2.24118	0.0250145	0.116489	INHBA	protein_coding
ENSG00000230175.1	0.396297	2.20181	5.06285	0.434895	0.663639	NA	ENSG00000230175	processed_pseudogene
ENSG00000255282.6	0.646199	2.20159	3.49281	0.63032	0.528485	NA	WTAPP1	transcribed_processed_pseudogene
ENSG00000071282.12	31.2936	2.20056	0.499594	4.4047	1.05932e-05	0.000183295	LMCD1	protein_coding
ENSG00000227248.1	0.165564	2.20035	5.94432	0.370161	0.711263	NA	NALF1-IT1	lncRNA
ENSG00000058404	123.263	2.20033	0.369963	5.94744	2.7237e-09	9.69907e-08	CAMK2B	protein_coding
ENSG00000220925.2	0.365555	2.19977	5.10282	0.431089	0.666404	NA	IGBP1-AS2	lncRNA
ENSG00000288043.1	0.3657	2.19949	5.94434	0.370015	0.711371	NA	ENSG00000288043	lncRNA
ENSG00000278330.1	5.8096	2.19919	0.891951	2.4656	0.0136785	0.0747448	ENSG00000278330	lncRNA
ENSG00000277893.2	0.443446	2.19888	3.58016	0.614183	0.539094	NA	SRD5A2	protein_coding
ENSG00000144035.4	1.94945	2.19847	2.2238	0.988611	0.322854	NA	NAT8	protein_coding
ENSG00000237057.3	0.445335	2.198	4.90832	0.44781	0.65429	NA	LINC02087	lncRNA
ENSG00000172123.13	90.597	2.19799	0.369129	5.95454	2.60804e-09	9.33641e-08	SLFN12	protein_coding
ENSG00000278085.5	0.162851	2.19772	5.94438	0.369714	0.711596	NA	CT45A8	protein_coding
ENSG00000235907.2	0.443505	2.19667	4.17891	0.525656	0.599127	NA	ENSG00000235907	processed_pseudogene
ENSG00000226432.3	0.166184	2.19526	5.94444	0.369296	0.711907	NA	ENSG00000226432	processed_pseudogene
ENSG00000276807.1	0.416028	2.19516	4.20341	0.522233	0.601508	NA	ENSG00000276807	lncRNA
ENSG00000158270.12	104.079	2.19513	0.334367	6.56504	5.20181e-11	2.58331e-09	COLEC12	protein_coding
ENSG00000267737.1	0.245351	2.19512	5.94641	0.36915	0.712016	NA	ENSG00000267737	lncRNA
ENSG00000286912.1	0.250378	2.19494	5.94445	0.369242	0.711947	NA	ENSG00000286912	lncRNA
ENSG00000285177.1	0.293188	2.19445	5.94446	0.369159	0.712009	NA	ENSG00000285177	lncRNA
ENSG00000224769.1	0.849613	2.19246	3.81039	0.57539	0.565027	NA	MUC20P1	unprocessed_pseudogene
ENSG00000281756.1	0.459783	2.19196	4.93797	0.443899	0.657116	NA	C2-AS1	lncRNA
ENSG00000214889.3	0.426681	2.19036	5.94456	0.368465	0.712527	NA	RPS9P1	processed_pseudogene
ENSG00000204571	1.68263	2.18906	1.83266	1.19447	0.232294	NA	KRTAP5-11	protein_coding
ENSG00000157103	9.20825	2.18778	1.23738	1.76808	0.0770471	0.255923	SLC6A1	protein_coding
ENSG00000203706	5.01893	2.18546	1.11312	1.96337	0.0496032	0.189734	SERTAD4-AS1	lncRNA
ENSG00000266934.1	0.926836	2.18489	2.03081	1.07587	0.281985	NA	ENSG00000266934	lncRNA
ENSG00000269242.1	2.26414	2.18451	2.47809	0.881527	0.378032	NA	ENSG00000269242	protein_coding
ENSG00000254571.1	0.620111	2.18341	3.55392	0.614367	0.538973	NA	ENSG00000254571	lncRNA
ENSG00000249349.1	0.409302	2.18324	5.03325	0.433765	0.664459	NA	ENSG00000249349	lncRNA
ENSG00000162576.17	160.146	2.18246	0.368793	5.91786	3.26154e-09	1.14732e-07	MXRA8	protein_coding
ENSG00000259615.1	0.578726	2.18167	2.99799	0.727711	0.46679	NA	ENSG00000259615	lncRNA
ENSG00000230872.2	1.29658	2.17982	1.98469	1.09832	0.272065	NA	MFSD13B	transcribed_unitary_pseudogene
ENSG00000272895.1	0.160309	2.17853	5.94484	0.366458	0.714024	NA	ENSG00000272895	lncRNA
ENSG00000285838.2	0.828001	2.1783	2.60277	0.836917	0.402639	NA	ENSG00000285838	lncRNA
ENSG00000258620.2	0.697799	2.17678	2.05909	1.05716	0.290439	NA	ENSG00000258620	lncRNA
ENSG00000284607.1	0.802819	2.17653	2.28581	0.952194	0.340998	NA	ENSG00000284607	lncRNA
ENSG00000228470.1	0.653085	2.17645	2.71733	0.80095	0.42316	NA	ENSG00000228470	lncRNA
ENSG00000175147.13	9.45687	2.17638	1.08212	2.01122	0.0443017	0.175464	TMEM51-AS1	lncRNA
ENSG00000227868	0.619158	2.1704	3.1469	0.689695	0.490386	NA	TEX46	protein_coding
ENSG00000277020.4	1.15961	2.16948	1.94384	1.11608	0.264387	NA	ENSG00000277020	lncRNA
ENSG00000100842.13	6.20224	2.16882	1.20464	1.80039	0.0717997	0.244752	EFS	protein_coding
ENSG00000143858.12	735.706	2.16608	0.239632	9.03921	1.57811e-19	2.44088e-17	SYT2	protein_coding
ENSG00000203531.3	0.4028	2.16499	5.91846	0.365802	0.714512	NA	ENSG00000203531	processed_pseudogene
ENSG00000171724.3	28.5228	2.16352	0.603605	3.58432	0.000337952	0.00378718	VAT1L	protein_coding
ENSG00000261857.7	1.4953	2.16279	2.0097	1.07617	0.281849	NA	MIA	protein_coding
ENSG00000243038.1	0.900512	2.1619	2.13904	1.01069	0.312167	NA	ENSG00000243038	processed_pseudogene
ENSG00000204624.8	14.4355	2.16124	0.6857	3.15187	0.00162229	0.0138754	DISP3	protein_coding
ENSG00000258658.1	0.969147	2.16104	1.89501	1.14039	0.254125	NA	TOMM20L-DT	lncRNA
ENSG00000227352.1	0.365077	2.15816	5.94614	0.362951	0.716642	NA	ARHGEF7-AS1	lncRNA
ENSG00000270469.1	2.01463	2.15784	1.61147	1.33905	0.180555	NA	ENSG00000270469	processed_pseudogene
ENSG00000220184.2	1.21264	2.15783	1.99154	1.0835	0.278588	NA	HMGB3P18	processed_pseudogene
ENSG00000263142.5	9.08948	2.15699	1.2208	1.76686	0.0772513	0.256276	LRRC37A17P	transcribed_unprocessed_pseudogene
ENSG00000280113.2	0.155557	2.15638	5.94614	0.362652	0.716865	NA	ENSG00000280113	TEC
ENSG00000259771.1	1.20217	2.15592	1.97026	1.09423	0.273855	NA	ENSG00000259771	lncRNA
ENSG00000230991.2	0.119467	2.15514	5.94616	0.362442	0.717022	NA	ENSG00000230991	lncRNA
ENSG00000214797.3	1.80605	2.155	1.77748	1.21239	0.225361	NA	ENSG00000214797	lncRNA
ENSG00000178171.11	0.572066	2.15463	3.99427	0.539429	0.589591	NA	AMER3	protein_coding
ENSG00000249593.6	0.655995	2.15396	4.77117	0.451454	0.651663	NA	ENSG00000249593	lncRNA
ENSG00000167332.9	0.319323	2.15373	5.94616	0.362204	0.717199	NA	OR51E2	protein_coding
ENSG00000174332	8.84501	2.15364	0.825906	2.60761	0.00911756	0.0549495	GLIS1	protein_coding
ENSG00000285595.1	0.162658	2.15304	5.94618	0.362088	0.717286	NA	ENSG00000285595	lncRNA
ENSG00000226186.1	0.696907	2.15285	2.30763	0.932927	0.350858	NA	ELOCP21	processed_pseudogene
ENSG00000273792.1	1.25804	2.15134	1.65694	1.29838	0.194156	NA	ENSG00000273792	lncRNA
ENSG00000274737.1	1.11455	2.15123	1.65849	1.2971	0.194597	NA	ENSG00000274737	lncRNA
ENSG00000166426.8	427.577	2.15069	0.16026	13.42	4.61466e-41	4.92117e-38	CRABP1	protein_coding
ENSG00000133134.12	0.810731	2.15041	2.55483	0.841704	0.399954	NA	BEX2	protein_coding
ENSG00000267391	0.48792	2.15036	3.57938	0.600764	0.547997	NA	MIR122HG	lncRNA
ENSG00000261219.1	0.203339	2.14994	5.94624	0.361562	0.717679	NA	ENSG00000261219	lncRNA
ENSG00000279255	0.995341	2.14984	1.74049	1.23519	0.216759	NA	ENSG00000279255	TEC
ENSG00000285723.1	11.8621	2.14968	1.18146	1.8195	0.0688345	0.237521	MKKS	protein_coding
ENSG00000150281.7	0.328849	2.14938	5.09001	0.422274	0.672825	NA	CTF1	protein_coding
ENSG00000250934	4.85604	2.14933	1.06093	2.0259	0.0427746	0.171284	ENSG00000250934	lncRNA
ENSG00000251675.1	0.283392	2.14829	5.94628	0.361283	0.717888	NA	ENSG00000251675	lncRNA
ENSG00000248969.1	0.443646	2.14806	4.10061	0.523838	0.600391	NA	ENSG00000248969	lncRNA
ENSG00000237124.1	0.276568	2.14773	5.34961	0.401474	0.688071	NA	MTND2P11	unprocessed_pseudogene
ENSG00000257951.2	0.82498	2.14737	3.11057	0.690345	0.489977	NA	ENSG00000257951	unprocessed_pseudogene
ENSG00000237506.3	2.86646	2.14677	1.24257	1.72768	0.0840455	NA	RPSAP15	processed_pseudogene
ENSG00000286427.1	1.51964	2.14636	1.82774	1.17433	0.240264	NA	ENSG00000286427	lncRNA
ENSG00000282998.1	0.410236	2.14545	3.09034	0.694243	0.48753	NA	ENSG00000282998	lncRNA
ENSG00000125851.10	1.48837	2.14538	1.64482	1.30432	0.192123	NA	PCSK2	protein_coding
ENSG00000224747.1	0.51251	2.14487	3.98983	0.537585	0.590863	NA	MTCYBP21	processed_pseudogene
ENSG00000276568.1	0.523028	2.14435	3.0863	0.694796	0.487183	NA	Metazoa_SRP	misc_RNA
ENSG00000278794.1	0.528239	2.14415	3.06165	0.700326	0.483724	NA	Metazoa_SRP	misc_RNA
ENSG00000267076.1	1.57308	2.14353	1.6034	1.33686	0.181268	NA	MIX23P3	processed_pseudogene
ENSG00000204055.5	2.80879	2.14284	1.88357	1.13765	0.255269	NA	IER5L-AS1	lncRNA
ENSG00000232502.1	0.239042	2.14245	5.9463	0.360299	0.718623	NA	ENSG00000232502	transcribed_processed_pseudogene
ENSG00000229688.8	1.83951	2.14108	1.65368	1.29474	0.195411	NA	CRPPA-AS1	lncRNA
ENSG00000160951.4	2.70718	2.14087	1.38751	1.54296	0.122841	NA	PTGER1	protein_coding
ENSG00000262362.1	0.401837	2.14078	3.51019	0.609876	0.541944	NA	ENSG00000262362	lncRNA
ENSG00000230729.1	0.451598	2.13999	3.44268	0.621606	0.534201	NA	ENSG00000230729	lncRNA
ENSG00000255308.1	0.589016	2.13965	3.56122	0.600818	0.547961	NA	CSRP3-AS1	lncRNA
ENSG00000226642.1	0.489977	2.13931	3.45699	0.618835	0.536025	NA	ACTG1P12	processed_pseudogene
ENSG00000224826.1	0.709268	2.13914	2.33232	0.917177	0.35905	NA	USP21P1	processed_pseudogene
ENSG00000157570.12	596.334	2.13804	0.258331	8.27634	1.27018e-16	1.42979e-14	TSPAN18	protein_coding
ENSG00000047648.23	124.321	2.13804	0.312526	6.84114	7.85641e-12	4.50953e-10	ARHGAP6	protein_coding
ENSG00000271357.1	0.622947	2.13714	2.94467	0.725765	0.467983	NA	ENSG00000271357	processed_pseudogene
ENSG00000230725.6	1.1356	2.13667	1.8605	1.14844	0.250788	NA	ENSG00000230725	lncRNA
ENSG00000242071.3	0.559227	2.13645	2.77207	0.770707	0.440881	NA	RPL7AP6	processed_pseudogene
ENSG00000263432.2	3.74127	2.13627	1.57459	1.35671	0.174873	NA	RN7SL689P	misc_RNA
ENSG00000234869.1	2.29646	2.13615	1.62391	1.31544	0.188363	NA	LINC02925	lncRNA
ENSG00000267397.1	1.62382	2.13527	1.62004	1.31803	0.187492	NA	ENSG00000267397	lncRNA
ENSG00000279474.1	1.61771	2.13491	1.62015	1.31772	0.187596	NA	ENSG00000279474	TEC
ENSG00000231386.1	0.788964	2.13478	2.87491	0.742556	0.45775	NA	MOB4P1	processed_pseudogene
ENSG00000266876.1	0.461643	2.13474	2.76169	0.772984	0.439532	NA	ENSG00000266876	transcribed_processed_pseudogene
ENSG00000258591.2	1.4398	2.13361	1.67066	1.2771	0.201567	NA	PPIAP4	processed_pseudogene
ENSG00000054179.12	31.9539	2.13244	0.448832	4.75108	2.02335e-06	4.09972e-05	ENTPD2	protein_coding
ENSG00000229325.1	4.47851	2.13228	1.155	1.84613	0.0648732	0.228324	ACAP2-IT1	lncRNA
ENSG00000275265.1	0.784298	2.13204	2.23256	0.954976	0.33959	NA	ENSG00000275265	lncRNA
ENSG00000007908.16	0.145726	2.13176	5.95821	0.357786	0.720504	NA	SELE	protein_coding
ENSG00000176009	1.11766	2.13088	2.35645	0.904277	0.365849	NA	ASCL3	protein_coding
ENSG00000269883.1	2.9346	2.1305	1.0962	1.94354	0.0519514	NA	ENSG00000269883	lncRNA
ENSG00000226380	8.32803	2.13009	0.928921	2.29308	0.0218435	0.105807	NA	NA
ENSG00000130812.11	3.61169	2.1298	1.24915	1.705	0.0881952	NA	ANGPTL6	protein_coding
ENSG00000226774.1	1.53878	2.1298	1.93533	1.10048	0.271121	NA	HIKESHIP1	processed_pseudogene
ENSG00000171885.18	15.2475	2.12921	0.954729	2.23017	0.0257359	0.119028	AQP4	protein_coding
ENSG00000224958.6	1.87965	2.12823	1.80273	1.18056	0.237777	NA	PGM5-AS1	lncRNA
ENSG00000166473	4.87834	2.12745	1.26596	1.68051	0.0928591	0.287913	PKD1L2	protein_coding
ENSG00000113749	50.957	2.12739	0.571932	3.71965	0.000199498	0.00242486	HRH2	protein_coding
ENSG00000259120.3	1.54211	2.12717	1.59213	1.33605	0.181533	NA	SMIM6	protein_coding
ENSG00000260469.3	2.50029	2.12412	1.52798	1.39014	0.164485	NA	INSYN1-AS1	lncRNA
ENSG00000286742.1	4.00922	2.12136	1.19119	1.78087	0.0749332	0.251457	ENSG00000286742	lncRNA
ENSG00000212175.1	0.583639	2.12107	3.00509	0.705826	0.480296	NA	ENSG00000212175	snoRNA
ENSG00000234961.1	1.42149	2.12077	1.83684	1.15458	0.248264	NA	ENSG00000234961	lncRNA
ENSG00000186642.16	40.8895	2.12036	0.49524	4.28149	1.8565e-05	0.000302432	PDE2A	protein_coding
ENSG00000273821.1	1.55037	2.12006	1.65113	1.284	0.199142	NA	ENSG00000273821	lncRNA
ENSG00000279319.1	1.24526	2.11928	1.70715	1.24142	0.214451	NA	ENSG00000279319	TEC
ENSG00000258520.1	1.46914	2.11865	1.77868	1.19114	0.233599	NA	ENSG00000258520	lncRNA
ENSG00000222448.1	2.63382	2.11719	1.31057	1.61548	0.106208	NA	RN7SKP150	misc_RNA
ENSG00000229657.2	0.775295	2.11629	2.3413	0.903893	0.366052	NA	ENSG00000229657	processed_pseudogene
ENSG00000260070.1	2.1096	2.11624	1.51918	1.39301	0.163615	NA	ENSG00000260070	lncRNA
ENSG00000264007.1	1.26725	2.11583	1.61663	1.30879	0.190604	NA	ENSG00000264007	lncRNA
ENSG00000286644.1	0.771514	2.11484	2.79602	0.756376	0.449424	NA	ENSG00000286644	lncRNA
ENSG00000177807.10	11.0213	2.11477	0.743089	2.84591	0.00442844	0.0315392	KCNJ10	protein_coding
ENSG00000256389.2	1.46231	2.11286	2.59337	0.814715	0.415235	NA	ENSG00000256389	lncRNA
ENSG00000227200.1	0.967314	2.11194	1.92654	1.09623	0.272977	NA	ENSG00000227200	lncRNA
ENSG00000288611.1	1.70155	2.11164	1.59697	1.32228	0.186076	NA	NPBWR1	protein_coding
ENSG00000248394.1	0.887652	2.11096	2.44461	0.863518	0.387852	NA	FOSL1P1	processed_pseudogene
ENSG00000248564.1	0.899594	2.11049	1.80923	1.16651	0.243408	NA	ENSG00000248564	processed_pseudogene
ENSG00000196542	16.005	2.1101	1.54502	1.36574	0.172021	0.421614	SPTSSB	protein_coding
ENSG00000249274.1	2.27374	2.10927	1.42638	1.47876	0.139205	NA	PDLIM1P4	processed_pseudogene
ENSG00000257534.1	0.504423	2.10921	3.93412	0.536133	0.591866	NA	ENSG00000257534	lncRNA
ENSG00000249906.1	0.981613	2.10822	2.45041	0.860353	0.389594	NA	NGFR-AS1	lncRNA
ENSG00000187416.13	1.99428	2.10634	2.19062	0.961524	0.336289	NA	LHFPL3	protein_coding
ENSG00000285850.1	0.529387	2.10583	2.94425	0.715235	0.474464	NA	ENSG00000285850	lncRNA
ENSG00000163046.16	1.84649	2.10541	1.69857	1.23952	0.215154	NA	ANKRD30BL	protein_coding
ENSG00000241318.3	0.906939	2.10474	2.18201	0.964586	0.334752	NA	WDR82P2	processed_pseudogene
ENSG00000188013.6	0.925949	2.10458	2.03257	1.03543	0.30047	NA	MEIS3P2	processed_pseudogene
ENSG00000253972.6	0.586822	2.10422	3.95472	0.532079	0.594672	NA	MAL2-AS1	lncRNA
ENSG00000227245.1	0.363988	2.10402	3.60461	0.583703	0.55942	NA	ENSG00000227245	lncRNA
ENSG00000186007.10	1.46316	2.10379	1.89506	1.11015	0.266936	NA	LEMD1	protein_coding
ENSG00000265799.1	1.62379	2.1032	1.79016	1.17486	0.24005	NA	ENSG00000265799	lncRNA
ENSG00000261243.1	0.115063	2.10309	5.94822	0.353566	0.723664	NA	ENSG00000261243	lncRNA
ENSG00000118492.18	2.23545	2.10271	1.32547	1.58639	0.112652	NA	ADGB	protein_coding
ENSG00000186086	0.114997	2.10227	5.94825	0.353427	0.723769	NA	NBPF6	protein_coding
ENSG00000231193.1	0.327062	2.10205	5.94823	0.353392	0.723795	NA	ENSG00000231193	lncRNA
ENSG00000255174.1	0.399865	2.10205	3.1193	0.673886	0.500384	NA	ENSG00000255174	processed_pseudogene
ENSG00000224231.2	0.151014	2.10198	5.94825	0.353378	0.723805	NA	LINC01832	lncRNA
ENSG00000265094.1	0.392547	2.10165	4.13295	0.508512	0.611095	NA	ENSG00000265094	lncRNA
ENSG00000253785.1	0.353859	2.10146	4.22669	0.497189	0.619056	NA	ENSG00000253785	processed_pseudogene
ENSG00000144158.4	0.634344	2.10145	2.43158	0.86423	0.387462	NA	SNRPA1P1	processed_pseudogene
ENSG00000183092	138.619	2.10126	0.284162	7.39459	1.4184e-13	1.03864e-11	BEGAIN	protein_coding
ENSG00000283528.2	0.324579	2.10119	5.94828	0.353243	0.723906	NA	TCAF2C	protein_coding
ENSG00000230783.1	0.364576	2.10111	5.09162	0.41266	0.679856	NA	RPS3AP13	processed_pseudogene
ENSG00000279772.1	0.198939	2.10103	5.94825	0.353218	0.723925	NA	ENSG00000279772	TEC
ENSG00000172201.12	0.53313	2.10094	5.6462	0.372099	0.709819	NA	ID4	protein_coding
ENSG00000256271.1	0.285885	2.10068	5.94825	0.35316	0.723969	NA	CACNA1C-AS2	lncRNA
ENSG00000279781.1	0.235611	2.10066	5.94824	0.353156	0.723972	NA	ENSG00000279781	TEC
ENSG00000164879.7	10.289	2.10059	0.783643	2.68054	0.00735026	0.0464829	CA3	protein_coding
ENSG00000088320.4	0.305401	2.10029	5.94829	0.353091	0.72402	NA	REM1	protein_coding
ENSG00000260660.4	1.01418	2.10005	2.34001	0.897454	0.369477	NA	ENSG00000260660	transcribed_unitary_pseudogene
ENSG00000285820.1	0.626463	2.0999	3.00955	0.697744	0.485337	NA	ENSG00000285820	lncRNA
ENSG00000285970.1	2.32342	2.09988	1.35015	1.5553	0.119875	NA	ENSG00000285970	lncRNA
ENSG00000203727.4	481.598	2.09983	0.226678	9.26347	1.97887e-20	3.45654e-18	SAMD5	protein_coding
ENSG00000162543.6	0.857251	2.09983	3.69843	0.567761	0.570198	NA	UBXN10	protein_coding
ENSG00000233762.3	0.726443	2.09971	2.21766	0.946811	0.343735	NA	RPS15P4	processed_pseudogene
ENSG00000287970.1	0.322064	2.09945	5.94829	0.35295	0.724126	NA	ENSG00000287970	lncRNA
ENSG00000260158.1	0.726317	2.09893	3.02619	0.693587	0.487941	NA	ENSG00000260158	lncRNA
ENSG00000244405.8	98.7733	2.09887	0.622204	3.37328	0.000742776	0.00728467	ETV5	protein_coding
ENSG00000187581.3	0.910247	2.09886	2.20575	0.951541	0.34133	NA	COX8C	protein_coding
ENSG00000204011.5	0.199036	2.09878	5.94827	0.352838	0.72421	NA	COL5A1-AS1	lncRNA
ENSG00000184384.14	487.914	2.0984	0.157435	13.3286	1.57757e-40	1.52213e-37	MAML2	protein_coding
ENSG00000214513.4	0.557973	2.09832	2.70872	0.774654	0.438544	NA	NOTO	protein_coding
ENSG00000189280.3	0.975317	2.09823	2.24117	0.936224	0.349158	NA	GJB5	protein_coding
ENSG00000286764.1	1.00994	2.09804	2.01919	1.03905	0.298782	NA	ENSG00000286764	lncRNA
ENSG00000261325	0.939484	2.09794	2.0867	1.00539	0.314711	NA	LINC02192	lncRNA
ENSG00000257569.1	0.235495	2.09792	5.94829	0.352693	0.724319	NA	GSTP1P1	processed_pseudogene
ENSG00000231688.1	1.11799	2.09782	1.8729	1.12009	0.262675	NA	RPL21P43	processed_pseudogene
ENSG00000280103.1	0.330374	2.09768	4.28875	0.489112	0.624762	NA	ENSG00000280103	TEC
ENSG00000279619.1	2.34882	2.09765	1.71234	1.22502	0.220568	NA	ENSG00000279619	TEC
ENSG00000261519.3	5.03362	2.09762	0.975	2.15141	0.0314442	0.137459	ENSG00000261519	lncRNA
ENSG00000278961	1.63623	2.09746	1.85081	1.13326	0.257104	NA	ENSG00000278961	artifact
ENSG00000213994.3	0.447153	2.097	3.09306	0.67797	0.497791	NA	ENSG00000213994	lncRNA
ENSG00000203280.4	1.19009	2.09666	1.99835	1.04919	0.29409	NA	KIAA1671-AS1	lncRNA
ENSG00000230499.1	0.761134	2.09632	2.58803	0.810006	0.417937	NA	ENSG00000230499	lncRNA
ENSG00000286407.1	0.440249	2.09619	4.82765	0.434206	0.664139	NA	ENSG00000286407	lncRNA
ENSG00000230183.4	0.36142	2.09563	4.25788	0.492176	0.622595	NA	CNOT6LP1	processed_pseudogene
ENSG00000204612.1	0.564558	2.09555	3.24227	0.646322	0.518071	NA	FOXB2	protein_coding
ENSG00000234937.1	0.518603	2.09549	2.91012	0.72007	0.471482	NA	ENSG00000234937	processed_pseudogene
ENSG00000056291.19	0.532829	2.09539	3.46311	0.605059	0.54514	NA	NPFFR2	protein_coding
ENSG00000251333.3	0.20362	2.09529	5.94832	0.352248	0.724652	NA	RTN3P1	processed_pseudogene
ENSG00000267529.3	0.315685	2.09528	5.16279	0.405843	0.684858	NA	ENSG00000267529	lncRNA
ENSG00000250751.1	0.446016	2.09497	4.13022	0.50723	0.611993	NA	ENSG00000250751	lncRNA
ENSG00000234025.1	0.240763	2.09445	5.94832	0.352107	0.724758	NA	RBPMS2P1	processed_pseudogene
ENSG00000275569.1	0.765196	2.09443	2.32264	0.901747	0.367191	NA	ENSG00000275569	lncRNA
ENSG00000229503.1	0.610564	2.09424	2.81773	0.743237	0.457338	NA	RPL21P37	processed_pseudogene
ENSG00000269954.2	4.56004	2.09412	1.84955	1.13224	0.257535	0.535092	ENSG00000269954	lncRNA
ENSG00000249641.2	20.885	2.09333	0.474254	4.41395	1.01502e-05	0.000176384	HOXC13-AS	lncRNA
ENSG00000237928.6	0.799242	2.09283	1.98913	1.05213	0.292739	NA	NFIA-AS2	lncRNA
ENSG00000258285.1	0.438743	2.09279	3.0957	0.676031	0.499021	NA	TESC-AS1	lncRNA
ENSG00000280758.1	3.18773	2.09268	1.42462	1.46894	0.141849	NA	ENSG00000280758	lncRNA
ENSG00000257070.1	0.784156	2.09253	2.36652	0.884226	0.376574	NA	ENSG00000257070	processed_pseudogene
ENSG00000249263.2	1.22491	2.09227	2.03726	1.027	0.30442	NA	PARP4P3	transcribed_unprocessed_pseudogene
ENSG00000203910.9	0.611087	2.09217	2.58983	0.80784	0.419183	NA	C1orf146	protein_coding
ENSG00000231948.2	0.845153	2.09194	1.84935	1.13117	0.257982	NA	HS1BP3-IT1	lncRNA
ENSG00000279764.1	1.62541	2.09108	2.14001	0.977135	0.328502	NA	ENSG00000279764	TEC
ENSG00000279571.3	3.81416	2.08988	1.52786	1.36785	0.171359	NA	ENSG00000279571	lncRNA
ENSG00000216639.1	2.48906	2.08962	1.41818	1.47345	0.14063	NA	RPL7AP35	processed_pseudogene
ENSG00000196503.5	0.928196	2.08957	2.02164	1.03361	0.301321	NA	ARL9	protein_coding
ENSG00000188536.13	71.7502	2.08945	0.317344	6.58417	4.57422e-11	2.29982e-09	HBA2	protein_coding
ENSG00000279839.1	0.972329	2.0888	2.35926	0.88536	0.375963	NA	ENSG00000279839	TEC
ENSG00000233635.2	0.138357	2.08856	5.95938	0.350465	0.725989	NA	ENSG00000233635	lncRNA
ENSG00000254442.1	0.191737	2.08807	5.94844	0.351028	0.725567	NA	ENSG00000254442	processed_pseudogene
ENSG00000255443.1	0.571459	2.08784	2.46814	0.845914	0.397601	NA	CD44-AS1	lncRNA
ENSG00000158104.11	7.00002	2.08783	0.915099	2.28153	0.0225171	0.108374	HPD	protein_coding
ENSG00000204832.10	1.7103	2.08761	1.63858	1.27403	0.202651	NA	ST8SIA6-AS1	lncRNA
ENSG00000257052.1	0.834171	2.08749	2.15077	0.970579	0.331758	NA	PRPF19-DT	lncRNA
ENSG00000276092.1	0.402031	2.08724	3.61199	0.577866	0.563355	NA	ENSG00000276092	lncRNA
ENSG00000275016.5	0.839784	2.0872	2.80836	0.743209	0.457355	NA	ENSG00000275016	lncRNA
ENSG00000259797.1	0.842728	2.087	2.49896	0.835145	0.403636	NA	ENSG00000259797	lncRNA
ENSG00000221994.12	0.979416	2.08693	2.17716	0.958553	0.337784	NA	ZNF630	protein_coding
ENSG00000267062.1	0.748586	2.08659	2.80011	0.74518	0.456163	NA	ENSG00000267062	lncRNA
ENSG00000236493.2	0.590598	2.08504	2.92706	0.712332	0.476259	NA	EIF2S2P3	processed_pseudogene
ENSG00000256533.1	1.33702	2.08483	2.45969	0.847599	0.396661	NA	ENSG00000256533	processed_pseudogene
ENSG00000214820.3	1.17054	2.08473	2.18592	0.953709	0.340231	NA	MPRIPP1	processed_pseudogene
ENSG00000200534.1	10.3516	2.08349	1.92017	1.08505	0.277898	0.557667	SNORA33	snoRNA
ENSG00000166897.16	336.354	2.08131	0.236493	8.80073	1.35935e-18	1.84853e-16	ELFN2	protein_coding
ENSG00000166448.15	30.5296	2.08116	0.597815	3.48127	0.000499038	0.00525819	TMEM130	protein_coding
ENSG00000227288.3	0.580992	2.08114	3.94838	0.527087	0.598133	NA	ARID3BP1	processed_pseudogene
ENSG00000275756.1	0.69855	2.08071	3.42382	0.607717	0.543375	NA	ENSG00000275756	processed_pseudogene
ENSG00000271709.1	0.435219	2.0797	4.79626	0.433609	0.664573	NA	ENSG00000271709	lncRNA
ENSG00000162444.12	0.507959	2.07924	3.11361	0.66779	0.504267	NA	RBP7	protein_coding
ENSG00000272663.1	3.16825	2.0786	1.13648	1.82897	0.0674034	NA	PPP1R21-DT	lncRNA
ENSG00000237513	5.60947	2.07625	1.2254	1.69435	0.0901984	0.282573	NA	NA
ENSG00000228169.3	1.70076	2.07589	1.43146	1.45019	0.147005	NA	PPIAP19	processed_pseudogene
ENSG00000255521	0.980732	2.07365	2.88618	0.718476	0.472464	NA	CD44-DT	lncRNA
ENSG00000206028.1	2.07867	2.07164	1.82539	1.1349	0.256416	NA	ENSG00000206028	lncRNA
ENSG00000223528.7	0.958763	2.06934	2.32037	0.891816	0.372492	NA	ENSG00000223528	lncRNA
ENSG00000229955.1	1.16062	2.06912	1.93396	1.06989	0.28467	NA	ENSG00000229955	lncRNA
ENSG00000184497.13	27.2945	2.06902	0.640795	3.22883	0.00124297	0.0111442	TMEM255B	protein_coding
ENSG00000270540.1	5.34427	2.06881	1.1643	1.77688	0.0755888	0.252864	ENSG00000270540	lncRNA
ENSG00000228604.3	0.612221	2.06606	2.77097	0.745608	0.455904	NA	ENSG00000228604	lncRNA
ENSG00000287134.1	1.16383	2.06512	2.02369	1.02047	0.307505	NA	ENSG00000287134	lncRNA
ENSG00000133256.13	15.5436	2.06511	0.718342	2.87483	0.00404245	0.029421	PDE6B	protein_coding
ENSG00000286692.1	0.227974	2.06507	5.95005	0.347068	0.72854	NA	ENSG00000286692	lncRNA
ENSG00000273454.1	1.21124	2.0647	1.98229	1.04157	0.297611	NA	ENSG00000273454	lncRNA
ENSG00000188396.4	1.01129	2.06421	1.93661	1.06588	0.286476	NA	DYNLT4	protein_coding
ENSG00000006210.7	10.8512	2.06408	1.2016	1.71778	0.0858374	0.274816	CX3CL1	protein_coding
ENSG00000228350.1	0.875818	2.0636	2.23718	0.922409	0.356315	NA	LINC02585	lncRNA
ENSG00000213277.3	0.593016	2.06336	2.77483	0.743597	0.45712	NA	MARCKSL1P1	processed_pseudogene
ENSG00000278720.1	0.421196	2.06305	5.9501	0.346726	0.728797	NA	ENSG00000278720	processed_pseudogene
ENSG00000232623.1	0.894058	2.06252	1.88411	1.09469	0.273652	NA	MRAP-AS1	lncRNA
ENSG00000259548.1	0.858089	2.06161	2.0663	0.997729	0.318411	NA	ENSG00000259548	lncRNA
ENSG00000277386.1	0.51511	2.06103	2.71358	0.759524	0.447539	NA	ENSG00000277386	lncRNA
ENSG00000039139.11	9.01729	2.06016	1.23874	1.6631	0.096292	0.294546	DNAH5	protein_coding
ENSG00000236483.1	0.676091	2.05936	2.27952	0.903418	0.366304	NA	MTND2P40	unprocessed_pseudogene
ENSG00000249112.1	0.350279	2.05921	5.15249	0.399653	0.689412	NA	ENSG00000249112	lncRNA
ENSG00000259666.3	1.35031	2.05895	1.74357	1.18088	0.237649	NA	LINGO1-AS1	lncRNA
ENSG00000212163.6	1.1324	2.0589	2.08848	0.985838	0.324213	NA	SNORD91A	snoRNA
ENSG00000256705.3	0.583248	2.05867	2.56181	0.803602	0.421627	NA	ENSG00000256705	lncRNA
ENSG00000231882.1	0.623241	2.05866	2.97876	0.691115	0.489494	NA	F10-AS1	lncRNA
ENSG00000236463.1	0.349939	2.0583	5.1491	0.399739	0.689349	NA	LINC00427	lncRNA
ENSG00000196460.14	0.587274	2.05753	2.90724	0.707729	0.479114	NA	RFX8	protein_coding
ENSG00000135902.10	0.527152	2.05717	4.08308	0.503828	0.614382	NA	CHRND	protein_coding
ENSG00000213023.11	27.6623	2.05711	0.675257	3.04641	0.0023159	0.018658	SYT3	protein_coding
ENSG00000253283.1	0.268822	2.05664	5.95028	0.345638	0.729614	NA	ENSG00000253283	processed_pseudogene
ENSG00000287821.1	0.391065	2.05588	5.05219	0.40693	0.68406	NA	ENSG00000287821	lncRNA
ENSG00000275374.1	0.730943	2.05544	2.27304	0.904269	0.365853	NA	GUSBP19	unprocessed_pseudogene
ENSG00000264448.5	0.753402	2.05507	2.47136	0.831555	0.40566	NA	MIR378D2HG	lncRNA
ENSG00000204963.6	2.06868	2.05437	1.90865	1.07635	0.281773	NA	PCDHA7	protein_coding
ENSG00000228549.5	4.81638	2.05415	1.273	1.61363	0.106608	0.314287	ENSG00000228549	lncRNA
ENSG00000274351.1	0.627145	2.05415	2.5506	0.805359	0.420613	NA	ENSG00000274351	unprocessed_pseudogene
ENSG00000230163.1	0.488868	2.05373	2.48806	0.825436	0.409124	NA	ENSG00000230163	lncRNA
ENSG00000254230.1	0.746458	2.05318	5.35546	0.383381	0.701437	NA	ENSG00000254230	lncRNA
ENSG00000230697.1	0.710037	2.05285	2.49782	0.82186	0.411157	NA	SAP18P3	processed_pseudogene
ENSG00000285518.1	0.649317	2.05276	2.36589	0.867647	0.385588	NA	ENSG00000285518	lncRNA
ENSG00000242737.1	0.606227	2.05261	2.74232	0.748496	0.454161	NA	ENSG00000242737	processed_pseudogene
ENSG00000257723.1	0.358054	2.05199	5.9505	0.344844	0.730212	NA	CHCHD3P2	processed_pseudogene
ENSG00000272672.1	0.40232	2.05168	3.57408	0.574042	0.565939	NA	ENSG00000272672	lncRNA
ENSG00000229800.1	0.723623	2.05164	3.02293	0.678693	0.497332	NA	ATP8A2P2	processed_pseudogene
ENSG00000159409.15	8.7782	2.05115	0.95954	2.13764	0.0325463	0.140608	CELF3	protein_coding
ENSG00000279044.1	4.2823	2.05081	0.991497	2.0684	0.0386027	0.159107	ENSG00000279044	TEC
ENSG00000184999.13	0.435007	2.05062	3.12716	0.655744	0.511989	NA	SLC22A10	protein_coding
ENSG00000268743.1	0.353912	2.05032	5.1109	0.401165	0.688298	NA	ENSG00000268743	lncRNA
ENSG00000258053.1	0.356517	2.05021	3.63936	0.563344	0.573201	NA	ENSG00000258053	lncRNA
ENSG00000286674.1	0.440955	2.05013	3.57919	0.572792	0.566786	NA	ENSG00000286674	lncRNA
ENSG00000229032.1	0.192495	2.04997	5.95051	0.344503	0.730468	NA	ENSG00000229032	processed_pseudogene
ENSG00000104938.18	0.562888	2.04963	2.48007	0.826442	0.408554	NA	CLEC4M	protein_coding
ENSG00000237257.1	0.299561	2.04948	5.95048	0.344424	0.730528	NA	MTND2P8	unprocessed_pseudogene
ENSG00000262302.1	0.327238	2.04884	5.17415	0.395976	0.692123	NA	ENSG00000262302	protein_coding
ENSG00000229251.3	0.741349	2.04883	3.05072	0.67159	0.501845	NA	HNRNPA1P8	processed_pseudogene
ENSG00000248633.1	0.601566	2.04876	3.92435	0.522063	0.601626	NA	GET1P1	transcribed_processed_pseudogene
ENSG00000273958.1	0.642459	2.04875	2.96862	0.690134	0.49011	NA	ENSG00000273958	lncRNA
ENSG00000226045.1	0.547675	2.04867	3.98151	0.514545	0.606871	NA	ENSG00000226045	processed_pseudogene
ENSG00000276110.1	0.643643	2.04864	3.04299	0.673232	0.5008	NA	ENSG00000276110	lncRNA
ENSG00000286671.1	0.687855	2.04771	3.06909	0.667205	0.504641	NA	ENSG00000286671	lncRNA
ENSG00000279176.1	0.385118	2.04766	3.60052	0.568711	0.569552	NA	ENSG00000279176	TEC
ENSG00000185631.7	0.447986	2.04755	4.94658	0.413934	0.678923	NA	RPL14P6	processed_pseudogene
ENSG00000228002.2	0.36651	2.04744	4.28443	0.477879	0.632736	NA	DHX9P1	processed_pseudogene
ENSG00000006283.18	223.017	2.04738	0.237887	8.60653	7.53067e-18	9.53665e-16	CACNA1G	protein_coding
ENSG00000237200.1	0.589506	2.04734	2.71062	0.755304	0.450067	NA	ZBTB40-IT1	lncRNA
ENSG00000287165.1	0.575096	2.04664	3.04611	0.671886	0.501657	NA	ENSG00000287165	lncRNA
ENSG00000280148.1	0.5309	2.04646	3.61117	0.566703	0.570916	NA	ENSG00000280148	protein_coding
ENSG00000248993.1	0.985662	2.04629	2.82817	0.723536	0.46935	NA	ENSG00000248993	protein_coding
ENSG00000284803.1	0.471253	2.04607	3.54374	0.577375	0.563686	NA	ENSG00000284803	lncRNA
ENSG00000258064.1	0.110402	2.04601	5.95057	0.343834	0.730971	NA	ENSG00000258064	protein_coding
ENSG00000219163.2	0.110402	2.04601	5.95057	0.343834	0.730971	NA	HMGB1P20	processed_pseudogene
ENSG00000267355.2	0.110402	2.04601	5.95057	0.343834	0.730971	NA	RPL9P29	processed_pseudogene
ENSG00000176884.16	5.39604	2.04595	0.995589	2.05502	0.0398775	0.162968	GRIN1	protein_coding
ENSG00000288030.1	0.110388	2.04583	5.95058	0.343803	0.730994	NA	ENSG00000288030	lncRNA
ENSG00000251434.1	0.559218	2.04543	3.11252	0.657163	0.511076	NA	ENSG00000251434	lncRNA
ENSG00000273090.1	0.383509	2.0453	4.23679	0.482747	0.629275	NA	ENSG00000273090	lncRNA
ENSG00000268472.2	0.302096	2.0453	5.29488	0.386278	0.699291	NA	ENSG00000268472	lncRNA
ENSG00000199883.1	0.11034	2.04523	5.95061	0.343701	0.731071	NA	RN7SKP90	misc_RNA
ENSG00000206612.1	0.11034	2.04523	5.95061	0.343701	0.731071	NA	SNORA2A	snoRNA
ENSG00000207344.1	0.11034	2.04523	5.95061	0.343701	0.731071	NA	SNORA22C	snoRNA
ENSG00000242540.3	0.11034	2.04523	5.95061	0.343701	0.731071	NA	ENSG00000242540	lncRNA
ENSG00000184459	0.11034	2.04523	5.95061	0.343701	0.731071	NA	BPIFC	protein_coding
ENSG00000153822.15	0.11034	2.04523	5.95061	0.343701	0.731071	NA	KCNJ16	protein_coding
ENSG00000220868.2	0.11034	2.04523	5.95061	0.343701	0.731071	NA	MRPL35P1	processed_pseudogene
ENSG00000232825.3	0.11034	2.04523	5.95061	0.343701	0.731071	NA	PLPPR5-AS1	lncRNA
ENSG00000229835.2	0.152269	2.04522	5.9506	0.343701	0.731071	NA	KHSRPP1	processed_pseudogene
ENSG00000287971.1	0.155192	2.04521	5.95059	0.343698	0.731073	NA	ENSG00000287971	lncRNA
ENSG00000287088.1	0.155178	2.04518	5.9506	0.343693	0.731077	NA	ENSG00000287088	lncRNA
ENSG00000224559.2	0.234264	2.0447	5.95061	0.343611	0.731139	NA	LINC01087	lncRNA
ENSG00000214125.2	0.2802	2.04469	5.9506	0.34361	0.73114	NA	ENSG00000214125	processed_pseudogene
ENSG00000280650.1	0.488027	2.04465	5.73445	0.356556	0.721424	NA	KCNIP4-IT1	lncRNA
ENSG00000266127.1	0.188263	2.04462	5.95061	0.343599	0.731148	NA	ZNF415P1	processed_pseudogene
ENSG00000100170.10	0.325592	2.04427	5.95061	0.343539	0.731193	NA	SLC5A1	protein_coding
ENSG00000250135.1	0.399782	2.04418	5.0611	0.403901	0.686285	NA	ENSG00000250135	lncRNA
ENSG00000260008.1	0.452503	2.04404	4.09874	0.498699	0.617991	NA	ENSG00000260008	lncRNA
ENSG00000267083.1	0.192696	2.04401	5.95062	0.343495	0.731226	NA	KRT18P61	processed_pseudogene
ENSG00000240294.2	0.436537	2.04375	3.49772	0.58431	0.559012	NA	RN7SKP241	misc_RNA
ENSG00000280331.1	0.424197	2.04374	4.12283	0.495714	0.620096	NA	ENSG00000280331	TEC
ENSG00000225762.1	0.555747	2.04364	5.74311	0.355842	0.721959	NA	LINC01389	lncRNA
ENSG00000213041.4	0.152235	2.04364	5.95062	0.343433	0.731273	NA	ENSG00000213041	processed_pseudogene
ENSG00000233045.1	0.403158	2.04326	4.21624	0.484616	0.627949	NA	RPL15P5	processed_pseudogene
ENSG00000278068.1	0.798336	2.04325	3.16287	0.646013	0.518271	NA	ENSG00000278068	processed_pseudogene
ENSG00000232871.8	1.17309	2.04318	2.70051	0.756588	0.449297	NA	SEC1P	transcribed_unitary_pseudogene
ENSG00000288630	0.152206	2.04315	5.95065	0.343349	0.731336	NA	NA	NA
ENSG00000230106.1	0.65562	2.04296	4.4504	0.459052	0.646197	NA	SNRPCP15	processed_pseudogene
ENSG00000223723.1	0.315136	2.04175	5.95069	0.343111	0.731515	NA	TFDP1P2	processed_pseudogene
ENSG00000224302.1	0.356507	2.0415	4.26408	0.478766	0.632105	NA	ENSG00000224302	processed_pseudogene
ENSG00000279065.1	0.434031	2.04126	4.16564	0.490024	0.624117	NA	ENSG00000279065	TEC
ENSG00000259504.2	0.52228	2.04115	3.52172	0.57959	0.562191	NA	ENSG00000259504	lncRNA
ENSG00000226627.2	0.190035	2.04111	5.95071	0.343002	0.731597	NA	SHANK2-AS1	lncRNA
ENSG00000258642.1	0.191575	2.04108	5.95065	0.343001	0.731597	NA	ENSG00000258642	lncRNA
ENSG00000258357.1	0.236091	2.04094	5.95065	0.342978	0.731615	NA	NSA2P2	processed_pseudogene
ENSG00000143839.15	1.00845	2.04094	2.51099	0.812805	0.41633	NA	REN	protein_coding
ENSG00000256651.1	0.470087	2.04071	4.06244	0.502334	0.615432	NA	ENSG00000256651	unprocessed_pseudogene
ENSG00000287023	0.593802	2.04032	4.42131	0.461475	0.644458	NA	ENSG00000287023	lncRNA
ENSG00000271268.1	0.314768	2.04015	5.21009	0.391577	0.695371	NA	ENSG00000271268	processed_pseudogene
ENSG00000230399.1	0.188537	2.04005	5.95074	0.342822	0.731732	NA	RBBP8P1	processed_pseudogene
ENSG00000269321.1	0.230301	2.04005	5.95074	0.342822	0.731732	NA	ENSG00000269321	lncRNA
ENSG00000267185.1	0.370466	2.03952	4.20879	0.484585	0.627971	NA	PTP4A2P1	processed_pseudogene
ENSG00000234751.1	0.384013	2.03906	5.08144	0.401276	0.688217	NA	ENSG00000234751	processed_pseudogene
ENSG00000266368.1	0.396026	2.03883	5.05154	0.403604	0.686504	NA	ENSG00000266368	lncRNA
ENSG00000240776.1	0.194506	2.03882	5.9507	0.342619	0.731885	NA	ENSG00000240776	processed_pseudogene
ENSG00000273049.1	0.306757	2.03881	5.9507	0.342617	0.731887	NA	ENSG00000273049	protein_coding
ENSG00000268854.1	0.274658	2.03835	5.9508	0.342534	0.731949	NA	ENSG00000268854	lncRNA
ENSG00000146677.7	0.325322	2.03816	5.95079	0.342502	0.731973	NA	RPL32P18	processed_pseudogene
ENSG00000074410.14	29.5261	2.03787	1.01658	2.00463	0.045003	0.177353	CA12	protein_coding
ENSG00000287921.1	0.43655	2.03715	4.8675	0.418522	0.675566	NA	ENSG00000287921	lncRNA
ENSG00000233668.1	0.273562	2.03715	5.95082	0.34233	0.732103	NA	ENSG00000233668	processed_pseudogene
ENSG00000286179.1	0.226606	2.0371	5.95083	0.342322	0.732108	NA	ENSG00000286179	lncRNA
ENSG00000261678.3	12.3888	2.03689	0.669785	3.04112	0.00235702	0.0189516	SCRT1	protein_coding
ENSG00000234073.1	0.153183	2.03666	5.95084	0.342248	0.732164	NA	ENSG00000234073	processed_pseudogene
ENSG00000237661.1	0.154047	2.03661	5.95085	0.342238	0.732172	NA	TNIP2P1	processed_pseudogene
ENSG00000217495.2	0.195822	2.03636	5.95086	0.342197	0.732203	NA	ENSG00000217495	processed_pseudogene
ENSG00000249664.1	0.23581	2.03628	5.95085	0.342184	0.732213	NA	ENSG00000249664	lncRNA
ENSG00000167654.18	31.2584	2.03605	0.489898	4.15608	3.23753e-05	0.000498093	ATCAY	protein_coding
ENSG00000279415.1	0.268432	2.03526	5.95088	0.34201	0.732344	NA	ENSG00000279415	TEC
ENSG00000258203.5	0.26862	2.03525	5.95074	0.342017	0.732338	NA	ENSG00000258203	lncRNA
ENSG00000273485.1	0.160287	2.03336	5.95093	0.341688	0.732585	NA	ENSG00000273485	lncRNA
ENSG00000253477.5	1.3893	2.03334	1.97248	1.03086	0.302608	NA	ENSG00000253477	lncRNA
ENSG00000220256.4	0.451871	2.03328	3.49618	0.581572	0.560855	NA	ENSG00000220256	lncRNA
ENSG00000261581.1	0.396723	2.03246	5.95096	0.341535	0.732701	NA	HERC2P11	unprocessed_pseudogene
ENSG00000183629	1.90803	2.03222	2.09513	0.969974	0.332059	NA	GOLGA8G	protein_coding
ENSG00000252797.1	0.433101	2.03222	4.81663	0.421917	0.673085	NA	RN7SKP272	misc_RNA
ENSG00000285984.1	0.439714	2.03204	4.89022	0.415533	0.677752	NA	ENSG00000285984	lncRNA
ENSG00000159307	214.839	2.03107	0.288555	7.03877	1.93942e-12	1.20173e-10	SCUBE1	protein_coding
ENSG00000285727.1	0.280046	2.03106	5.95082	0.341308	0.732872	NA	ENSG00000285727	lncRNA
ENSG00000117834.13	0.432442	2.03063	4.93103	0.411806	0.680482	NA	SLC5A9	protein_coding
ENSG00000123360.12	92.7198	2.03046	0.474727	4.27711	1.89332e-05	0.000307638	PDE1B	protein_coding
ENSG00000280365.1	0.147998	2.02972	5.95082	0.341082	0.733042	NA	ENSG00000280365	TEC
ENSG00000165025.15	322.606	2.02829	0.527519	3.84496	0.000120571	0.00156503	SYK	protein_coding
ENSG00000166446.15	59.8852	2.02686	0.987451	2.05262	0.0401096	0.163449	CDYL2	protein_coding
ENSG00000226797.2	0.733715	2.02667	3.417	0.593113	0.553106	NA	ENSG00000226797	lncRNA
ENSG00000196436	1.86582	2.0264	1.68719	1.20105	0.229731	NA	NPIPB15	protein_coding
ENSG00000185002.10	5.60404	2.02306	1.69781	1.19157	0.233429	0.505099	RFX6	protein_coding
ENSG00000267304.1	0.40178	2.02111	5.95129	0.339609	0.734151	NA	ENSG00000267304	lncRNA
ENSG00000279780.1	7.02585	2.01981	0.669519	3.01681	0.0025545	0.0203377	ENSG00000279780	TEC
ENSG00000238363.1	0.917182	2.01928	2.81347	0.717719	0.472931	NA	SNORA13	snoRNA
ENSG00000255091.1	0.233305	2.01881	5.95135	0.339218	0.734445	NA	ENSG00000255091	lncRNA
ENSG00000259059.1	0.146835	2.01537	5.95144	0.338635	0.734885	NA	PEBP1P1	processed_pseudogene
ENSG00000165895.19	150.106	2.01353	0.428101	4.7034	2.55862e-06	5.08262e-05	ARHGAP42	protein_coding
ENSG00000277618.1	0.146591	2.01041	5.95159	0.337794	0.735518	NA	ENSG00000277618	processed_pseudogene
ENSG00000124469.12	5.26208	2.00931	1.23265	1.63007	0.103087	0.307757	CEACAM8	protein_coding
ENSG00000278703.1	1.92432	2.00788	1.54851	1.29665	0.194751	NA	ENSG00000278703	lncRNA
ENSG00000078725.13	0.455532	2.00765	5.90105	0.340219	0.733692	NA	BRINP1	protein_coding
ENSG00000206172.8	306.341	2.00619	0.524516	3.82483	0.00013086	0.00168029	HBA1	protein_coding
ENSG00000268658.5	6.5283	2.0061	0.793457	2.5283	0.0114617	0.0655296	LINC00664	lncRNA
ENSG00000053108.17	35.8543	2.00578	0.817122	2.45469	0.0141007	0.0763927	FSTL4	protein_coding
ENSG00000152217.20	313.183	2.00563	0.220169	9.10951	8.2752e-20	1.34138e-17	SETBP1	protein_coding
ENSG00000167094.16	0.793327	2.00554	2.04229	0.982007	0.326096	NA	TTC16	protein_coding
ENSG00000233608.4	31.5721	2.00508	1.12294	1.78556	0.0741705	0.249683	TWIST2	protein_coding
ENSG00000128242.13	1.32558	2.0046	2.22101	0.902565	0.366757	NA	GAL3ST1	protein_coding
ENSG00000204941.14	0.774823	2.00426	3.05488	0.656085	0.51177	NA	PSG5	protein_coding
ENSG00000286065	0.177749	2.00308	5.9481	0.33676	0.736298	NA	NA	NA
ENSG00000226746.2	2.1746	2.00228	1.73286	1.15548	0.247895	NA	SMCR5	lncRNA
ENSG00000251018.2	0.400176	2.00067	3.10849	0.643614	0.519826	NA	HMMR-AS1	lncRNA
ENSG00000259267	0.506071	2.00051	4.08329	0.489927	0.624185	NA	LINC02622	lncRNA
ENSG00000165409.18	15.0325	1.99822	0.912274	2.19038	0.028497	0.128054	TSHR	protein_coding
ENSG00000185559.16	203.922	1.99504	0.567064	3.51819	0.000434504	0.00467796	DLK1	protein_coding
ENSG00000285082	0.996646	1.99452	2.38691	0.835608	0.403376	NA	ENSG00000285082	protein_coding
ENSG00000157502.13	35.0366	1.99283	0.723548	2.75424	0.00588277	0.0392629	PWWP3B	protein_coding
ENSG00000229051.2	20.928	1.99159	0.799795	2.49012	0.0127698	0.0710051	LINC01788	lncRNA
ENSG00000173210.20	23.3331	1.99129	0.768645	2.59065	0.00957954	0.0569377	ABLIM3	protein_coding
ENSG00000286046.1	2.03649	1.99078	1.74161	1.14307	0.253011	NA	ENSG00000286046	lncRNA
ENSG00000007062.12	2.80962	1.99014	1.54257	1.29014	0.197	NA	PROM1	protein_coding
ENSG00000182040.9	43.5875	1.98888	0.398132	4.99552	5.8678e-07	1.32546e-05	USH1G	protein_coding
ENSG00000178187.8	6.72441	1.98829	0.872181	2.27968	0.0226269	0.108616	ZNF454	protein_coding
ENSG00000287860	8.50186	1.98827	0.733016	2.71246	0.00667866	0.043248	ENSG00000287860	lncRNA
ENSG00000117595	0.397546	1.98803	5.96727	0.333155	0.739017	NA	IRF6	protein_coding
ENSG00000233682.3	0.724314	1.98742	2.39458	0.829967	0.406557	NA	FNDC1-AS1	lncRNA
ENSG00000187550.9	1.17635	1.98695	1.91683	1.03658	0.299931	NA	SBK2	protein_coding
ENSG00000171551.12	463.212	1.98165	0.167196	11.8523	2.09374e-32	1.03472e-29	ECEL1	protein_coding
ENSG00000225123.2	2.1605	1.97967	1.37225	1.44264	0.149121	NA	ENSG00000225123	processed_pseudogene
ENSG00000233242.3	1.54038	1.97841	1.81162	1.09207	0.274802	NA	ENSG00000233242	lncRNA
ENSG00000285935.1	4.07409	1.9783	2.50054	0.791148	0.428858	0.700402	ENSG00000285935	lncRNA
ENSG00000283108	0.305554	1.97765	5.29078	0.373791	0.70856	NA	ENSG00000283108	lncRNA
ENSG00000156959.9	1.80521	1.97503	2.26561	0.871741	0.38335	NA	LHFPL4	protein_coding
ENSG00000151322.20	15.3551	1.97378	0.921992	2.14077	0.0322922	0.139832	NPAS3	protein_coding
ENSG00000162494.6	1.91638	1.97297	1.55915	1.26542	0.205721	NA	LRRC38	protein_coding
ENSG00000245598	1.99459	1.97204	2.05957	0.9575	0.338315	NA	DACT3-AS1	lncRNA
ENSG00000077080.10	1.05634	1.9716	2.07787	0.948856	0.342694	NA	ACTL6B	protein_coding
ENSG00000168685.15	171.315	1.97144	0.411381	4.79226	1.64916e-06	3.38211e-05	IL7R	protein_coding
ENSG00000173376.14	16.0299	1.97135	0.630619	3.12606	0.00177165	0.0149634	NDNF	protein_coding
ENSG00000239300.6	1.14822	1.96971	1.8495	1.065	0.286878	NA	ENSG00000239300	lncRNA
ENSG00000253483.1	4.61383	1.96903	0.940774	2.09299	0.0363502	0.152332	ENSG00000253483	processed_pseudogene
ENSG00000287731.1	6.18489	1.96807	0.871032	2.25947	0.0238544	0.112561	ENSG00000287731	lncRNA
ENSG00000229859.10	1.55295	1.96493	1.77027	1.10996	0.267015	NA	PGA3	protein_coding
ENSG00000226964.1	3.61799	1.96491	1.32316	1.48501	0.137541	NA	RHEBP2	processed_pseudogene
ENSG00000129673.10	1.78042	1.9637	2.00068	0.981512	0.32634	NA	AANAT	protein_coding
ENSG00000136573	2.28032	1.96347	1.77857	1.10396	0.269612	NA	BLK	protein_coding
ENSG00000267201.1	2.75826	1.96341	1.19257	1.64637	0.0996877	NA	LINC01775	lncRNA
ENSG00000268201.1	2.23749	1.96323	1.373	1.42988	0.152751	NA	ENSG00000268201	lncRNA
ENSG00000169427.8	23.7593	1.96225	0.758598	2.58667	0.0096907	0.0574972	KCNK9	protein_coding
ENSG00000280078.1	1.14344	1.96188	1.5905	1.23349	0.217392	NA	ENSG00000280078	TEC
ENSG00000248456.1	0.289606	1.96129	5.91503	0.331577	0.740209	NA	LINC02485	lncRNA
ENSG00000258485.2	0.593452	1.96128	3.05212	0.642594	0.520487	NA	SRMP2	processed_pseudogene
ENSG00000053918.18	74.6776	1.95986	0.49496	3.95962	7.50683e-05	0.00103837	KCNQ1	protein_coding
ENSG00000241030.1	1.2063	1.95892	2.28806	0.856146	0.391917	NA	RPL29P24	processed_pseudogene
ENSG00000227440.1	4.12473	1.95837	0.890027	2.20035	0.027782	0.125938	ATP5MC1P4	processed_pseudogene
ENSG00000267439.1	3.74168	1.95824	1.16156	1.68587	0.0918207	NA	ENSG00000267439	lncRNA
ENSG00000196335.13	10.2731	1.95697	1.37898	1.41914	0.155858	0.396485	STK31	protein_coding
ENSG00000169313.10	0.890874	1.95639	3.05543	0.6403	0.521978	NA	P2RY12	protein_coding
ENSG00000140107.12	0.556911	1.95552	2.52717	0.773796	0.439052	NA	SLC25A47	protein_coding
ENSG00000149451	1.17673	1.95426	2.61965	0.746002	0.455666	NA	ADAM33	protein_coding
ENSG00000166947.15	0.2079	1.95384	5.96325	0.327648	0.743178	NA	EPB42	protein_coding
ENSG00000217442.4	1.13466	1.94965	2.08276	0.936091	0.349226	NA	SYCE3	protein_coding
ENSG00000021488.13	2.07393	1.94961	1.68066	1.16003	0.246037	NA	SLC7A9	protein_coding
ENSG00000276649.1	1.72178	1.94544	1.65166	1.17787	0.238849	NA	ENSG00000276649	lncRNA
ENSG00000286957.1	0.980023	1.94446	2.94008	0.661363	0.50838	NA	ENSG00000286957	lncRNA
ENSG00000169933	0.31878	1.94282	5.95424	0.326293	0.744203	NA	FRMPD4	protein_coding
ENSG00000165816.13	32.2153	1.94202	0.646023	3.00612	0.00264604	0.0208777	VWA2	protein_coding
ENSG00000141639.12	135.972	1.94116	0.23896	8.12336	4.53445e-16	4.78526e-14	MAPK4	protein_coding
ENSG00000254791.1	1.53022	1.93964	1.9391	1.00028	0.317177	NA	FAR1-IT1	lncRNA
ENSG00000129993.15	61.3106	1.9383	0.609212	3.18165	0.00146439	0.0127784	CBFA2T3	protein_coding
ENSG00000123576.5	47.6006	1.93728	0.618756	3.13093	0.00174253	0.0147605	ESX1	protein_coding
ENSG00000177108.5	102.569	1.93686	0.29592	6.54521	5.94123e-11	2.92187e-09	ZDHHC22	protein_coding
ENSG00000173406.16	1.22693	1.93633	2.33459	0.829407	0.406874	NA	DAB1	protein_coding
ENSG00000065618.21	1.48128	1.93622	1.91896	1.009	0.312977	NA	COL17A1	protein_coding
ENSG00000157087.20	7.34468	1.93598	1.14179	1.69556	0.0899695	0.282192	ATP2B2	protein_coding
ENSG00000223878.1	2.02258	1.93318	1.56987	1.23143	0.218161	NA	PPIAP53	processed_pseudogene
ENSG00000286999.1	2.94189	1.93269	1.68314	1.14826	0.25086	NA	ENSG00000286999	lncRNA
ENSG00000166257.10	97.9936	1.93078	0.389283	4.95984	7.05505e-07	1.56058e-05	SCN3B	protein_coding
ENSG00000146592.17	15.5633	1.92975	0.770908	2.50322	0.0123069	0.0690371	CREB5	protein_coding
ENSG00000101850.13	3.57944	1.92841	1.54496	1.2482	0.211958	NA	GPR143	protein_coding
ENSG00000170476.16	1.50209	1.92814	1.94573	0.990959	0.321705	NA	MZB1	protein_coding
ENSG00000132259.13	1.14387	1.92791	2.37289	0.812473	0.41652	NA	CNGA4	protein_coding
ENSG00000264028.2	1.11001	1.92669	2.18795	0.880593	0.378538	NA	RN7SL744P	misc_RNA
ENSG00000286099.1	0.898308	1.92653	2.74696	0.701333	0.483095	NA	ENSG00000286099	lncRNA
ENSG00000259327.1	2.10564	1.92502	2.62048	0.734609	0.462578	NA	ENSG00000259327	lncRNA
ENSG00000116176	0.924556	1.92467	2.45363	0.784418	0.432795	NA	TPSG1	protein_coding
ENSG00000267927.1	0.751618	1.92457	2.12418	0.906031	0.364919	NA	ENSG00000267927	lncRNA
ENSG00000064886.14	12.5705	1.92454	0.694142	2.77254	0.00556199	0.0375157	CHI3L2	protein_coding
ENSG00000244040.7	1.50205	1.92342	1.93495	0.99404	0.320204	NA	IL12A-AS1	lncRNA
ENSG00000187942.12	1.82026	1.92335	1.71249	1.12313	0.261381	NA	LDLRAD2	protein_coding
ENSG00000287031.1	4.15978	1.921	0.860511	2.2324	0.0255887	0.118563	ENSG00000287031	lncRNA
ENSG00000286063.1	0.288156	1.92013	5.92386	0.324136	0.745835	NA	ENSG00000286063	lncRNA
ENSG00000266941.1	0.429945	1.91859	4.98006	0.385253	0.70005	NA	ENSG00000266941	lncRNA
ENSG00000135272	273.451	1.91794	0.565318	3.39268	0.00069212	0.00686093	MDFIC	protein_coding
ENSG00000164684.13	294.146	1.91595	0.55708	3.43927	0.000583278	0.00598399	ZNF704	protein_coding
ENSG00000050628	703.8	1.91326	0.294683	6.4926	8.43702e-11	4.02238e-09	PTGER3	protein_coding
ENSG00000265984.1	0.522896	1.91174	3.43135	0.557138	0.577433	NA	GREB1L-DT	lncRNA
ENSG00000267786.1	0.661154	1.9108	2.66591	0.716752	0.473527	NA	ENSG00000267786	lncRNA
ENSG00000262172.1	1.83145	1.91077	1.72247	1.10932	0.267292	NA	ENSG00000262172	lncRNA
ENSG00000254827	2.87039	1.9106	1.52277	1.25469	0.209591	NA	SLC22A18AS	lncRNA
ENSG00000267144.2	0.518328	1.91003	4.10711	0.465054	0.641893	NA	ZNF222-DT	lncRNA
ENSG00000187952.9	1.17175	1.90426	2.31126	0.823904	0.409994	NA	HS6ST1P1	processed_pseudogene
ENSG00000134548.11	20.386	1.89522	0.446701	4.24271	2.20839e-05	0.00035178	SPX	protein_coding
ENSG00000214946	0.470231	1.89454	5.91137	0.320492	0.748596	NA	TBC1D26	protein_coding
ENSG00000226237	3.33671	1.89411	1.08884	1.73957	0.0819349	NA	GAS1RR	lncRNA
ENSG00000155754.15	1.72517	1.89367	1.5747	1.20256	0.229146	NA	C2CD6	protein_coding
ENSG00000268812.3	3.94509	1.89324	0.968761	1.95429	0.0506673	0.192482	LIF-AS2	lncRNA
ENSG00000231822.1	1.63659	1.89208	1.71054	1.10613	0.268669	NA	SMC3P1	processed_pseudogene
ENSG00000225092.2	1.05183	1.88339	2.09914	0.89722	0.369601	NA	ENSG00000225092	lncRNA
ENSG00000236935	0.563872	1.88121	3.41039	0.551612	0.581214	NA	ENSG00000236935	lncRNA
ENSG00000251372	1.95261	1.88031	1.75288	1.07269	0.283409	NA	LINC00499	lncRNA
ENSG00000012779	36.2506	1.87998	0.463424	4.05671	4.97687e-05	0.00072915	ALOX5	protein_coding
ENSG00000223956	0.422888	1.87947	4.94688	0.379931	0.703997	NA	LINC01767	lncRNA
ENSG00000251009.2	0.57641	1.8788	2.93974	0.639105	0.522755	NA	ENSG00000251009	lncRNA
ENSG00000233270.1	0.600916	1.87784	3.37411	0.556543	0.57784	NA	SNRPEP4	processed_pseudogene
ENSG00000250433.1	2.44232	1.8776	1.54124	1.21824	0.223133	NA	CLSTN2-AS1	lncRNA
ENSG00000287193.1	1.7442	1.87488	1.62808	1.15158	0.249492	NA	ENSG00000287193	lncRNA
ENSG00000253695.2	4.63101	1.87451	0.962837	1.94686	0.0515513	0.194621	PINX1-DT	lncRNA
ENSG00000280778.1	2.07158	1.87408	1.96271	0.954844	0.339657	NA	ENSG00000280778	protein_coding
ENSG00000121895.8	1.81819	1.87337	1.59108	1.17742	0.239029	NA	TMEM156	protein_coding
ENSG00000160145.16	100.309	1.87301	0.467204	4.00897	6.09852e-05	0.00087451	KALRN	protein_coding
ENSG00000240634.1	0.593204	1.87287	3.31534	0.564909	0.572135	NA	ENSG00000240634	processed_pseudogene
ENSG00000154928.19	149.599	1.87283	0.519763	3.60324	0.000314277	0.00356744	EPHB1	protein_coding
ENSG00000103534.17	100.865	1.87266	0.42329	4.42407	9.68586e-06	0.000169185	TMC5	protein_coding
ENSG00000226632.1	1.0821	1.87259	1.74311	1.07428	0.282698	NA	UBE2V1P1	processed_pseudogene
ENSG00000188386.8	0.654206	1.87234	3.23448	0.578868	0.562678	NA	PPP3R2	protein_coding
ENSG00000258428.5	0.820588	1.87224	3.04449	0.614961	0.53858	NA	ENSG00000258428	lncRNA
ENSG00000287617.1	1.80503	1.87182	1.60298	1.16771	0.242922	NA	ENSG00000287617	lncRNA
ENSG00000174226.9	0.351671	1.87131	4.32792	0.432381	0.665464	NA	SNX31	protein_coding
ENSG00000273055.1	7.25581	1.87033	0.821905	2.2756	0.0228699	0.109385	ENSG00000273055	lncRNA
ENSG00000152377.14	730.317	1.86993	0.220781	8.46961	2.46208e-17	2.95188e-15	SPOCK1	protein_coding
ENSG00000279071.1	3.52252	1.86955	1.15833	1.614	0.106527	NA	ENSG00000279071	TEC
ENSG00000172689.2	3.70968	1.86709	1.13004	1.65224	0.0984864	NA	MS4A10	protein_coding
ENSG00000134716.11	24.5417	1.86637	0.629743	2.96371	0.00303957	0.023373	CYP2J2	protein_coding
ENSG00000182901	57.8296	1.86623	0.262259	7.11596	1.11134e-12	7.21727e-11	RGS7	protein_coding
ENSG00000065320.9	354.906	1.86569	0.200073	9.32506	1.10923e-20	2.00672e-18	NTN1	protein_coding
ENSG00000130598	0.683988	1.86323	2.50475	0.74388	0.456949	NA	TNNI2	protein_coding
ENSG00000258623.1	2.45357	1.8631	1.16965	1.59287	0.111189	NA	ENSG00000258623	lncRNA
ENSG00000276925.1	1.48653	1.86104	1.60915	1.15653	0.247463	NA	ENSG00000276925	processed_pseudogene
ENSG00000271984.1	0.897503	1.86048	1.79921	1.03405	0.301111	NA	ENSG00000271984	lncRNA
ENSG00000269933.1	4.46744	1.86003	1.64023	1.134	0.256793	0.534764	ENSG00000269933	lncRNA
ENSG00000286108.1	0.901986	1.85881	2.01295	0.923424	0.355786	NA	ENSG00000286108	lncRNA
ENSG00000278909.1	0.972223	1.85788	1.97365	0.941342	0.34653	NA	ENSG00000278909	TEC
ENSG00000118137.10	1.29386	1.8578	1.82592	1.01746	0.308936	NA	APOA1	protein_coding
ENSG00000285955.1	3.87411	1.85747	1.5957	1.16405	0.244404	NA	ENSG00000285955	lncRNA
ENSG00000182809.11	220.686	1.8574	0.242584	7.65672	1.90746e-14	1.58398e-12	CRIP2	protein_coding
ENSG00000270876	1.05559	1.8573	1.82504	1.01768	0.308832	NA	ZNF30-AS1	lncRNA
ENSG00000285529.1	0.7499	1.85662	1.93508	0.95945	0.337332	NA	ENSG00000285529	lncRNA
ENSG00000262884.1	0.870702	1.85646	2.09863	0.884608	0.376368	NA	ENSG00000262884	lncRNA
ENSG00000251045.1	0.766303	1.8563	2.29827	0.807694	0.419267	NA	SLC25A48-AS1	lncRNA
ENSG00000272861.1	1.20962	1.8559	1.82869	1.01488	0.310165	NA	ENSG00000272861	lncRNA
ENSG00000128510.12	6.43586	1.85574	1.78526	1.03948	0.298582	0.579405	CPA4	protein_coding
ENSG00000226410.1	0.724139	1.85573	2.18878	0.847841	0.396526	NA	ENSG00000226410	processed_pseudogene
ENSG00000240750.3	1.85922	1.85524	1.68043	1.10402	0.269583	NA	RN7SL559P	misc_RNA
ENSG00000157542.11	2.08458	1.85519	1.48631	1.24818	0.211966	NA	KCNJ6	protein_coding
ENSG00000257953.1	0.917748	1.85394	2.11702	0.875732	0.381176	NA	ENSG00000257953	lncRNA
ENSG00000219392	1.917	1.85351	1.57245	1.17875	0.2385	NA	ZNF602P	transcribed_unprocessed_pseudogene
ENSG00000285480.2	0.992438	1.85343	1.90772	0.971545	0.331277	NA	H2BK1	protein_coding
ENSG00000236780.7	0.670916	1.85326	2.86429	0.647023	0.517617	NA	LINC01829	lncRNA
ENSG00000273107.1	0.719062	1.85295	2.02624	0.914479	0.360465	NA	ENSG00000273107	lncRNA
ENSG00000250167	9.64741	1.8527	0.921172	2.01124	0.0443001	0.175464	ENSG00000250167	lncRNA
ENSG00000244693	0.238016	1.85231	5.92545	0.312603	0.754582	NA	NA	NA
ENSG00000228740.3	0.723674	1.85221	2.27515	0.814105	0.415585	NA	GABRG3-AS1	lncRNA
ENSG00000151812.15	0.782321	1.85214	4.39654	0.421273	0.673556	NA	SLC35F4	protein_coding
ENSG00000272180.1	1.51573	1.85197	2.04173	0.907059	0.364376	NA	ENSG00000272180	lncRNA
ENSG00000223787.2	0.520923	1.85147	2.97677	0.621972	0.53396	NA	ENSG00000223787	processed_pseudogene
ENSG00000255348.1	1.02321	1.84995	2.05712	0.899288	0.368499	NA	ENSG00000255348	lncRNA
ENSG00000152822.14	2.00434	1.84855	1.74332	1.06036	0.28898	NA	GRM1	protein_coding
ENSG00000271447.6	3.31146	1.84728	1.63886	1.12717	0.259671	NA	MMP28	protein_coding
ENSG00000174912.7	0.607401	1.8472	2.01726	0.915696	0.359827	NA	METTL15P1	processed_pseudogene
ENSG00000118971.9	1969.03	1.84671	0.124232	14.865	5.56275e-50	1.12712e-46	CCND2	protein_coding
ENSG00000287619.1	1.61738	1.84576	1.59427	1.15775	0.246966	NA	ENSG00000287619	lncRNA
ENSG00000134216.19	2.44513	1.84425	1.54593	1.19297	0.232881	NA	CHIA	protein_coding
ENSG00000229153	1.83033	1.84422	1.9982	0.922941	0.356038	NA	EPHA1-AS1	lncRNA
ENSG00000143512.13	11.008	1.84383	1.09905	1.67766	0.0934141	0.289014	HHIPL2	protein_coding
ENSG00000213300.5	9.74291	1.84382	0.929994	1.98261	0.0474108	0.184034	HNRNPA3P6	processed_pseudogene
ENSG00000258741	8.66115	1.84344	1.27956	1.44068	0.149676	0.38747	H2AZ2P1	transcribed_processed_pseudogene
ENSG00000164082.15	26.6852	1.84305	0.540136	3.4122	0.000644403	0.00650694	GRM2	protein_coding
ENSG00000256288.1	1.93165	1.84281	1.5877	1.16067	0.245775	NA	LINC02617	lncRNA
ENSG00000232893.1	1.71027	1.8418	1.75915	1.04698	0.295107	NA	IQCA1-AS1	lncRNA
ENSG00000243243.5	0.36763	1.83902	3.66722	0.501475	0.616037	NA	ENSG00000243243	lncRNA
ENSG00000285629.1	2.52697	1.83893	1.59884	1.15017	0.250075	NA	ENSG00000285629	protein_coding
ENSG00000112212.12	0.474004	1.83867	3.57517	0.514289	0.60705	NA	TSPO2	protein_coding
ENSG00000216316.1	1.06316	1.83784	1.86543	0.98521	0.324521	NA	ENSG00000216316	processed_pseudogene
ENSG00000283317.1	1.23403	1.83782	1.86339	0.986275	0.323998	NA	ENSG00000283317	lncRNA
ENSG00000260331.1	2.09151	1.8368	1.79692	1.02219	0.30669	NA	ENSG00000260331	lncRNA
ENSG00000259648.1	1.45609	1.83618	1.87059	0.981602	0.326296	NA	ENSG00000259648	transcribed_processed_pseudogene
ENSG00000247287.3	1.39901	1.8352	2.09079	0.877753	0.380078	NA	PRKCH-AS1	lncRNA
ENSG00000267058.1	1.57451	1.8352	2.11324	0.86843	0.385159	NA	ENSG00000267058	lncRNA
ENSG00000267303.1	7.58317	1.83406	1.40717	1.30337	0.192448	0.451004	ENSG00000267303	protein_coding
ENSG00000170419.11	4.47017	1.83385	1.33033	1.37849	0.168053	0.415406	VSTM2A	protein_coding
ENSG00000261600.1	0.632238	1.83327	2.17138	0.844289	0.398508	NA	ENSG00000261600	lncRNA
ENSG00000089199.10	37.572	1.83325	0.585747	3.12977	0.00174945	0.0148067	CHGB	protein_coding
ENSG00000172940.13	2.45897	1.83315	1.48071	1.23802	0.215709	NA	SLC22A13	protein_coding
ENSG00000203804.5	1.82989	1.83155	2.09868	0.872714	0.382819	NA	ADAMTSL4-AS1	lncRNA
ENSG00000279028.1	1.8585	1.83149	1.94152	0.943323	0.345516	NA	ENSG00000279028	lncRNA
ENSG00000257195.1	0.805925	1.82985	2.10627	0.868765	0.384976	NA	HNRNPA1P50	processed_pseudogene
ENSG00000111262.6	0.136175	1.82976	5.96858	0.306566	0.759174	NA	KCNA1	protein_coding
ENSG00000275674.1	0.758975	1.82925	1.96504	0.930893	0.351909	NA	ENSG00000275674	protein_coding
ENSG00000286581.1	1.03965	1.82905	1.99172	0.918327	0.358448	NA	ENSG00000286581	lncRNA
ENSG00000264801.1	1.67934	1.82861	1.51768	1.20487	0.228253	NA	ERVFRD-3	transcribed_processed_pseudogene
ENSG00000013588.9	3.31774	1.8283	1.51436	1.20731	0.227312	NA	GPRC5A	protein_coding
ENSG00000286204.1	0.94195	1.82801	1.93056	0.946878	0.343701	NA	ENSG00000286204	lncRNA
ENSG00000226801.2	0.738853	1.82776	2.80573	0.651439	0.514763	NA	OSTCP8	processed_pseudogene
ENSG00000168124.2	2.12757	1.82656	1.47944	1.23463	0.216968	NA	OR1F1	protein_coding
ENSG00000235045.2	0.723427	1.82643	2.51935	0.724959	0.468477	NA	RPL7P8	processed_pseudogene
ENSG00000236516.1	0.882479	1.8261	2.31621	0.788398	0.430464	NA	KLF2P4	processed_pseudogene
ENSG00000260681.1	0.753099	1.82494	4.02238	0.453698	0.650047	NA	ENSG00000260681	lncRNA
ENSG00000147262.5	1.98268	1.82419	1.6863	1.08177	0.279354	NA	GPR119	protein_coding
ENSG00000171794.4	107.455	1.82334	0.517214	3.52531	0.00042298	0.00457822	UTF1	protein_coding
ENSG00000115363.14	84.9321	1.82269	0.353325	5.15868	2.48701e-07	6.1081e-06	EVA1A	protein_coding
ENSG00000266075.2	0.655976	1.82264	2.71724	0.670768	0.502368	NA	RN7SL574P	misc_RNA
ENSG00000260799.1	0.945954	1.82219	2.64222	0.689645	0.490417	NA	KRT8P50	processed_pseudogene
ENSG00000273433.1	8.18116	1.82168	1.81482	1.00378	0.315485	0.596414	ENSG00000273433	lncRNA
ENSG00000091137.14	41.004	1.82102	0.544596	3.34379	0.000826413	0.00795816	SLC26A4	protein_coding
ENSG00000257907.2	0.661565	1.81961	2.68043	0.67885	0.497233	NA	EEF1A1P17	processed_pseudogene
ENSG00000259073.1	0.968743	1.81952	2.65872	0.684361	0.493747	NA	FOXN3-AS2	lncRNA
ENSG00000159860.7	1.59899	1.81952	2.60314	0.698969	0.484572	NA	TCAF2P1	transcribed_unprocessed_pseudogene
ENSG00000275263.1	2.85925	1.81823	1.40537	1.29378	0.195743	NA	ENSG00000275263	lncRNA
ENSG00000253582.1	0.913465	1.81729	2.55279	0.711883	0.476537	NA	OXR1-AS1	lncRNA
ENSG00000242931.1	1.33171	1.81725	1.47672	1.2306	0.218474	NA	RPL7P49	processed_pseudogene
ENSG00000285933.1	13.591	1.81688	0.565495	3.2129	0.00131404	0.0116572	ENSG00000285933	lncRNA
ENSG00000102195.10	0.820043	1.81491	2.99563	0.605854	0.544612	NA	GPR50	protein_coding
ENSG00000167749	1.60263	1.8108	2.38213	0.760158	0.44716	NA	KLK4	protein_coding
ENSG00000135063.20	79.9793	1.81049	0.2827	6.40426	1.51096e-10	6.71382e-09	FAM189A2	protein_coding
ENSG00000214725	1.41553	1.80865	1.41528	1.27794	0.201269	NA	CDIPTOSP	transcribed_unitary_pseudogene
ENSG00000184588.18	35.8097	1.80787	0.53649	3.36982	0.000752175	0.00735548	PDE4B	protein_coding
ENSG00000162552.15	9.14974	1.80734	1.00892	1.79137	0.0732345	0.247933	WNT4	protein_coding
ENSG00000287723.1	3.94658	1.80716	1.0806	1.67237	0.0944507	0.291022	ENSG00000287723	lncRNA
ENSG00000288595	2.22472	1.80639	1.3634	1.32491	0.185201	NA	ENSG00000288595	lncRNA
ENSG00000137573.14	10.2591	1.80498	1.32986	1.35727	0.174697	0.425496	SULF1	protein_coding
ENSG00000091129	319.252	1.80185	0.365952	4.92374	8.49048e-07	1.85182e-05	NRCAM	protein_coding
ENSG00000180210.15	3.50004	1.80108	1.24901	1.44201	0.149299	NA	F2	protein_coding
ENSG00000002587.10	7.07002	1.80018	1.69554	1.06172	0.288363	0.569531	HS3ST1	protein_coding
ENSG00000109132.7	0.785963	1.7995	3.35791	0.535898	0.592029	NA	PHOX2B	protein_coding
ENSG00000277117	47.5919	1.79885	0.355443	5.06087	4.17351e-07	9.76486e-06	ENSG00000277117	artifact
ENSG00000277589.1	2.30319	1.79794	1.54438	1.16419	0.244348	NA	ENSG00000277589	lncRNA
ENSG00000248794.1	2.74453	1.79566	1.32635	1.35384	0.175788	NA	ENSG00000248794	processed_pseudogene
ENSG00000220267.1	7.64274	1.79505	0.807151	2.22393	0.0261529	0.120379	ACTBP8	processed_pseudogene
ENSG00000120820.13	52.3626	1.79453	0.502237	3.57308	0.000352813	0.00392569	GLT8D2	protein_coding
ENSG00000288028.1	3.57465	1.79212	1.32574	1.35179	0.176441	NA	ENSG00000288028	lncRNA
ENSG00000273321.1	1.75909	1.79161	1.69773	1.0553	0.291289	NA	ENSG00000273321	lncRNA
ENSG00000249375.8	0.367193	1.79113	5.15377	0.347538	0.728187	NA	CASC11	lncRNA
ENSG00000250387.3	2.10808	1.79066	1.47864	1.21102	0.225887	NA	LINC02197	lncRNA
ENSG00000165643.11	0.913117	1.78885	2.34845	0.761716	0.44623	NA	SOHLH1	protein_coding
ENSG00000118257.17	286.54	1.78672	0.328146	5.4449	5.18343e-08	1.46481e-06	NRP2	protein_coding
ENSG00000215217.7	2.4544	1.7858	1.29669	1.3772	0.168451	NA	C5orf49	protein_coding
ENSG00000050030.16	122.649	1.78451	0.272796	6.54155	6.0883e-11	2.98695e-09	NEXMIF	protein_coding
ENSG00000196139.14	51.159	1.7837	0.399901	4.46036	8.18213e-06	0.000146067	AKR1C3	protein_coding
ENSG00000274541.1	1.27114	1.78225	1.70058	1.04802	0.294628	NA	ENSG00000274541	processed_pseudogene
ENSG00000115523.17	0.539185	1.78175	4.70239	0.378902	0.70476	NA	GNLY	protein_coding
ENSG00000267102.1	10.6331	1.77984	0.727168	2.44764	0.0143796	0.0774895	ENSG00000267102	transcribed_processed_pseudogene
ENSG00000259104.2	4.72787	1.77975	0.890805	1.99791	0.0457268	0.179349	PTCSC3	lncRNA
ENSG00000174225.15	0.529914	1.77931	4.03323	0.441164	0.659095	NA	ARL13A	protein_coding
ENSG00000270823.1	2.2161	1.77822	1.15269	1.54268	0.122909	NA	ENSG00000270823	lncRNA
ENSG00000286688.1	4.02906	1.77736	1.13342	1.56814	0.116849	0.333277	ENSG00000286688	lncRNA
ENSG00000111344	108.068	1.77526	0.305256	5.81565	6.03983e-09	2.01945e-07	RASAL1	protein_coding
ENSG00000278727.1	6.32482	1.77028	0.862212	2.05318	0.0400551	0.163332	ENSG00000278727	lncRNA
ENSG00000269113.4	58.7926	1.77005	0.606332	2.91927	0.00350854	0.0261939	TRABD2B	protein_coding
ENSG00000286230.1	1.52275	1.76905	2.2893	0.772746	0.439673	NA	ENSG00000286230	lncRNA
ENSG00000132122.12	55.0405	1.76699	0.49308	3.58357	0.000338931	0.00378996	SPATA6	protein_coding
ENSG00000112530	5.24582	1.76681	1.53705	1.14948	0.25036	0.526223	PACRG	protein_coding
ENSG00000139445.18	80.3335	1.76515	0.288716	6.11379	9.72938e-10	3.76215e-08	FOXN4	protein_coding
ENSG00000064692.20	141.533	1.7641	0.38222	4.61541	3.92313e-06	7.47091e-05	SNCAIP	protein_coding
ENSG00000154856.13	59.7366	1.76324	0.475538	3.70788	0.000208999	0.00252368	APCDD1	protein_coding
ENSG00000127329.16	171.54	1.76162	0.256091	6.87888	6.03268e-12	3.5226e-10	PTPRB	protein_coding
ENSG00000241735.2	0.448494	1.75983	4.15404	0.423643	0.671826	NA	FABP5P3	transcribed_processed_pseudogene
ENSG00000250569.1	4.50539	1.75975	1.09365	1.60906	0.107604	0.316073	NTAN1P2	processed_pseudogene
ENSG00000203809.7	2.11999	1.7593	1.85466	0.948584	0.342832	NA	LIN28B-AS1	lncRNA
ENSG00000268744.1	3.00727	1.75905	1.24508	1.41281	0.157713	NA	ENSG00000268744	lncRNA
ENSG00000248202.2	0.570855	1.75839	2.73374	0.643218	0.520083	NA	LINC02234	lncRNA
ENSG00000236496.2	2.44096	1.75767	1.14378	1.53672	0.124362	NA	GPS2P1	processed_pseudogene
ENSG00000272682.1	4.94744	1.75699	1.02453	1.71492	0.0863606	0.27541	ENSG00000272682	lncRNA
ENSG00000224810.1	6.79219	1.75579	0.80284	2.18697	0.0287445	0.128997	ENSG00000224810	lncRNA
ENSG00000145832	195	1.75564	0.17886	9.81573	9.63345e-23	2.09885e-20	SLC25A48	protein_coding
ENSG00000179141.9	1.0676	1.75535	2.20851	0.794812	0.426723	NA	MTUS2-AS1	lncRNA
ENSG00000235545.1	2.52163	1.75326	1.2302	1.42518	0.154104	NA	DOCK7-DT	lncRNA
ENSG00000187730.9	64.9765	1.7519	0.281958	6.21336	5.18642e-10	2.11443e-08	GABRD	protein_coding
ENSG00000112232.10	73.1863	1.75081	0.312123	5.60938	2.03058e-08	6.14083e-07	KHDRBS2	protein_coding
ENSG00000115155.19	0.851223	1.74834	2.20775	0.791912	0.428412	NA	OTOF	protein_coding
ENSG00000165323.16	751.325	1.74595	0.270354	6.45803	1.06075e-10	4.9409e-09	FAT3	protein_coding
ENSG00000271824.2	19.7673	1.74567	0.469194	3.72057	0.000198773	0.00241749	SMIM32	protein_coding
ENSG00000235494.2	0.8752	1.7453	2.67179	0.653232	0.513607	NA	ENSG00000235494	lncRNA
ENSG00000261204.1	4.37037	1.74477	0.99371	1.75582	0.07912	0.260516	ENSG00000261204	lncRNA
ENSG00000163734.4	9.51362	1.74366	0.870599	2.00283	0.0451959	0.177852	CXCL3	protein_coding
ENSG00000138738.11	2.41902	1.74285	1.46808	1.18716	0.235163	NA	PRDM5	protein_coding
ENSG00000198885.10	0.51046	1.74242	3.61601	0.481861	0.629905	NA	ITPRIPL1	protein_coding
ENSG00000225555.2	5.70866	1.74189	0.986451	1.76582	0.0774263	0.256551	ENSG00000225555	lncRNA
ENSG00000112053.14	2.44696	1.74177	1.51891	1.14672	0.251497	NA	SLC26A8	protein_coding
ENSG00000259560.2	1.33964	1.74172	1.91865	0.90778	0.363994	NA	ENSG00000259560	lncRNA
ENSG00000119121.22	18.6929	1.73991	0.674261	2.58047	0.00986674	0.0582687	TRPM6	protein_coding
ENSG00000174640.15	11.3243	1.73845	0.862709	2.0151	0.0438939	0.174381	SLCO2A1	protein_coding
ENSG00000260439.1	1.04217	1.73756	1.89298	0.917894	0.358674	NA	LMF1-AS1	lncRNA
ENSG00000262660.1	1.80617	1.73702	2.29898	0.755564	0.449911	NA	ENSG00000262660	protein_coding
ENSG00000287550.1	6.63423	1.73663	0.837021	2.07478	0.0380073	0.157389	ENSG00000287550	lncRNA
ENSG00000179399.15	47.1167	1.73634	0.436326	3.97945	6.90752e-05	0.000967913	GPC5	protein_coding
ENSG00000280294.1	10.9796	1.73495	0.84066	2.0638	0.0390371	0.160473	ENSG00000280294	TEC
ENSG00000249212.1	2.45933	1.73422	1.2218	1.4194	0.155782	NA	ATP1B1P1	unprocessed_pseudogene
ENSG00000288707.1	1.54495	1.73173	1.3598	1.27352	0.202833	NA	ENSG00000288707	lncRNA
ENSG00000198576.4	50.4261	1.72893	0.2728	6.33769	2.33232e-10	1.00762e-08	ARC	protein_coding
ENSG00000187513.9	0.31845	1.72743	5.9755	0.289085	0.772516	NA	GJA4	protein_coding
ENSG00000258593.2	5.43555	1.72683	0.98829	1.74729	0.0805874	0.263918	ENSG00000258593	lncRNA
ENSG00000161381.14	12.3862	1.72449	1.00515	1.71565	0.0862257	0.275265	PLXDC1	protein_coding
ENSG00000118849.10	1.62349	1.72376	1.48915	1.15754	0.24705	NA	RARRES1	protein_coding
ENSG00000257341.5	2.67188	1.72351	1.3143	1.31135	0.18974	NA	ENSG00000257341	protein_coding
ENSG00000171951.5	23.017	1.72344	0.56629	3.04339	0.00233929	0.0188165	SCG2	protein_coding
ENSG00000187546.14	0.514188	1.72305	3.55216	0.485071	0.627626	NA	AGMO	protein_coding
ENSG00000232626.3	1.80716	1.72036	1.61494	1.06528	0.286751	NA	ENSG00000232626	transcribed_processed_pseudogene
ENSG00000106178.7	2.01272	1.71951	1.50949	1.13914	0.254646	NA	CCL24	protein_coding
ENSG00000232453.7	0.681027	1.7177	2.41809	0.710353	0.477485	NA	LINC02777	lncRNA
ENSG00000264968.1	1.16078	1.71739	1.91898	0.894951	0.370813	NA	ENSG00000264968	lncRNA
ENSG00000141977.9	0.62059	1.7136	3.1605	0.542192	0.587686	NA	CIB3	protein_coding
ENSG00000261364.1	4.15229	1.71305	0.935062	1.83202	0.0669482	0.232796	ENSG00000261364	lncRNA
ENSG00000113721.14	7.58015	1.713	1.48859	1.15076	0.249833	0.525606	PDGFRB	protein_coding
ENSG00000095587.9	73.9625	1.71217	0.383772	4.46143	8.14144e-06	0.000145597	TLL2	protein_coding
ENSG00000143882.12	114.393	1.71196	0.290362	5.89596	3.72511e-09	1.29911e-07	ATP6V1C2	protein_coding
ENSG00000249188.1	2.13424	1.71146	1.38256	1.23789	0.215758	NA	ENPP7P1	transcribed_unprocessed_pseudogene
ENSG00000113073.15	1.23128	1.71006	2.71497	0.629862	0.528785	NA	SLC4A9	protein_coding
ENSG00000285636.2	1.39013	1.70775	1.6782	1.01761	0.308864	NA	ENSG00000285636	lncRNA
ENSG00000182759.4	73.7043	1.7075	0.282504	6.04416	1.50188e-09	5.64583e-08	MAFA	protein_coding
ENSG00000055813.6	56.3463	1.70713	0.59636	2.86258	0.00420208	0.0303431	CCDC85A	protein_coding
ENSG00000095932.7	2.33424	1.70609	1.98187	0.86085	0.389321	NA	SMIM24	protein_coding
ENSG00000241322.11	27.8674	1.70479	0.759664	2.24414	0.0248234	0.115839	FBXW10B	protein_coding
ENSG00000260369.2	2.59771	1.70477	1.34842	1.26427	0.206133	NA	ENSG00000260369	lncRNA
ENSG00000279200.1	6.91442	1.7006	0.950792	1.78862	0.0736765	0.248772	ENSG00000279200	TEC
ENSG00000007237.19	156.569	1.6989	0.608085	2.79385	0.00520843	0.0357861	GAS7	protein_coding
ENSG00000072182	0.546806	1.6986	3.14357	0.540342	0.588961	NA	ASIC4	protein_coding
ENSG00000169777.7	0.289685	1.69793	5.97789	0.284036	0.776383	NA	TAS2R1	protein_coding
ENSG00000277199.1	20.1578	1.69673	0.502969	3.37343	0.000742381	0.00728467	LINC01632	lncRNA
ENSG00000284670.1	0.736528	1.69632	2.14221	0.791854	0.428446	NA	RPSAP56	translated_processed_pseudogene
ENSG00000235236.1	2.97931	1.69547	0.974628	1.73961	0.0819272	NA	ENSG00000235236	lncRNA
ENSG00000104818.15	0.523494	1.69537	5.79998	0.292305	0.770053	NA	CGB2	protein_coding
ENSG00000185053.14	7.04649	1.69216	0.93151	1.81658	0.0692821	0.238457	SGCZ	protein_coding
ENSG00000219201.4	2.20512	1.69151	5.81627	0.290824	0.771186	NA	ENSG00000219201	processed_pseudogene
ENSG00000163739.5	0.732738	1.69109	3.19564	0.529186	0.596676	NA	CXCL1	protein_coding
ENSG00000275389.1	1.59667	1.68874	1.53621	1.09929	0.271642	NA	ENSG00000275389	lncRNA
ENSG00000182230	2.52659	1.68842	1.90869	0.884595	0.376375	NA	NA	NA
ENSG00000285704.1	1.71749	1.68698	1.72939	0.975476	0.329324	NA	ENSG00000285704	lncRNA
ENSG00000223382	0.969124	1.68471	2.3036	0.731338	0.464573	NA	LINC01778	lncRNA
ENSG00000283982.1	2.25086	1.67913	1.38781	1.20992	0.22631	NA	ENSG00000283982	lncRNA
ENSG00000283268.1	2.09184	1.6786	1.68621	0.995483	0.319501	NA	TEX54	protein_coding
[truncated: 36,267 more rows]

## Sheet: JARID2_Mock_RNA-Seq
gene_id	baseMean	log2FoldChange	lfcSE	stat	pvalue	padj	gene_name	gene_type
ENSG00000215695	13.8471	7.25848	5.33208	1.36129	0.173423	0.479554	RSC1A1	protein_coding
ENSG00000263424.1	9.88081	7.05679	5.04094	1.3999	0.161544	0.462105	ENSG00000263424	lncRNA
ENSG00000225108.1	8.25591	6.83401	5.8916	1.15996	NA	NA	ZBTB45P1	processed_pseudogene
ENSG00000267512.1	11.3923	6.63492	3.61497	1.8354	0.0664465	0.277908	ENSG00000267512	lncRNA
ENSG00000279592.1	6.48306	5.97814	4.41176	1.35505	0.175403	0.482901	ENSG00000279592	TEC
ENSG00000259132.1	1.42477	5.73257	5.8943	0.972562	0.330771	NA	ENSG00000259132	protein_coding
ENSG00000259040.5	11.4841	5.65495	3.17317	1.78211	0.0747306	0.298748	BLOC1S5-TXNDC5	protein_coding
ENSG00000288550	8.34668	5.64031	1.66919	3.37907	0.00072732	0.0113062	ENSG00000288550	protein_coding
ENSG00000280416.1	3.00198	5.5426	5.20584	1.06469	0.287016	NA	ENSG00000280416	TEC
ENSG00000174482	36.5127	5.40563	1.06586	5.07161	3.94463e-07	1.94902e-05	LINGO2	protein_coding
ENSG00000270066.3	10.6536	5.37173	2.54331	2.1121	0.0346775	0.183051	ENSG00000270066	lncRNA
ENSG00000107984.10	15.9941	5.17234	1.31389	3.93666	8.26231e-05	0.00193696	DKK1	protein_coding
ENSG00000257386.1	0.963815	5.16868	5.89671	0.876537	0.380738	NA	ENSG00000257386	lncRNA
ENSG00000286787	2.53133	5.14395	1.8168	2.83133	0.00463553	NA	ENSG00000286787	lncRNA
ENSG00000162631.20	44.0895	5.12436	0.965244	5.30888	1.10303e-07	6.31139e-06	NTNG1	protein_coding
ENSG00000237437.1	1.46007	5.04184	5.8974	0.854925	0.392593	NA	ASS1P12	processed_pseudogene
ENSG00000261071	3.12456	5.03462	5.89743	0.853697	0.393273	NA	ENSG00000261071	lncRNA
ENSG00000226147.1	2.72766	5.00318	2.3309	2.14646	0.0318365	NA	TUBBP10	processed_pseudogene
ENSG00000260727.2	2.63036	4.94546	5.89789	0.838513	0.401742	NA	SLC7A5P1	transcribed_unprocessed_pseudogene
ENSG00000183032.12	2.36129	4.91101	1.60373	3.06225	0.0021968	NA	SLC25A21	protein_coding
ENSG00000260515.1	6.60128	4.87132	2.06787	2.35572	0.0184869	0.121769	ENSG00000260515	lncRNA
ENSG00000261759.1	3.16606	4.70626	4.46571	1.05387	0.291944	NA	ENSG00000261759	lncRNA
ENSG00000258588.3	4.27076	4.70094	5.3545	0.877941	0.379975	NA	TRIM6-TRIM34	protein_coding
ENSG00000261534	5.83269	4.61223	5.90022	0.781705	0.434388	NA	NA	NA
ENSG00000010379.16	1.51278	4.50857	2.21353	2.03682	0.0416679	NA	SLC6A13	protein_coding
ENSG00000111405.9	1.34006	4.5071	2.77097	1.62654	0.103834	NA	ENDOU	protein_coding
ENSG00000270696.1	8.99215	4.50481	1.41733	3.17839	0.00148098	0.0196472	ENSG00000270696	lncRNA
ENSG00000237742	3.26629	4.45939	1.92958	2.31107	0.0208289	NA	HEY2-AS1	lncRNA
ENSG00000285314.1	3.62791	4.45936	4.52518	0.985455	0.324401	NA	ENSG00000285314	lncRNA
ENSG00000278977.1	8.86196	4.44634	2.15983	2.05866	0.0395272	0.200081	ENSG00000278977	TEC
ENSG00000283663.1	2.30787	4.41299	1.65753	2.66238	0.00775904	NA	ENSG00000283663	protein_coding
ENSG00000236698.1	3.71792	4.39929	2.14656	2.04946	0.0404169	NA	EIF1AXP1	processed_pseudogene
ENSG00000243710.8	5.71527	4.29131	1.23242	3.48201	0.00049767	NA	CFAP57	protein_coding
ENSG00000184564.11	4.44709	4.28452	1.78363	2.40214	0.0162994	NA	SLITRK6	protein_coding
ENSG00000275185.1	0.759265	4.25351	5.90331	0.72053	0.471199	NA	ENSG00000275185	lncRNA
ENSG00000250846.6	6.55982	4.17028	2.38342	1.7497	0.0801696	0.311912	EPHA5-AS1	lncRNA
ENSG00000257607.1	1.32248	4.14473	5.74431	0.721536	0.47058	NA	ENSG00000257607	lncRNA
ENSG00000214688.6	1.65136	4.1418	3.29335	1.25763	0.208527	NA	C10orf105	protein_coding
ENSG00000150551.11	37.5613	4.13193	1.31249	3.14815	0.00164307	0.0212583	LYPD1	protein_coding
ENSG00000254101	1.22049	4.12642	2.55777	1.61329	0.106681	NA	LINC02055	lncRNA
ENSG00000155897.10	0.769104	4.08606	4.35252	0.93878	0.347844	NA	ADCY8	protein_coding
ENSG00000250482.3	0.450968	4.07323	5.90519	0.689772	0.490338	NA	DUX4L51	processed_pseudogene
ENSG00000144481.17	3.40484	4.05203	1.8398	2.20243	0.0276347	NA	TRPM8	protein_coding
ENSG00000184672.12	11.6678	4.0448	1.20685	3.35153	0.000803665	0.0122304	RALYL	protein_coding
ENSG00000272934	1.82008	4.04197	2.08109	1.94224	0.0521085	NA	NA	NA
ENSG00000286239.1	6.20838	4.0418	2.23011	1.81237	0.0699287	NA	ENSG00000286239	protein_coding
ENSG00000168594.15	0.528741	4.03706	5.91966	0.681976	0.495254	NA	ADAM29	protein_coding
ENSG00000196542	16.005	4.0075	1.52737	2.62379	0.00869564	0.073111	SPTSSB	protein_coding
ENSG00000265967.1	1.05918	3.99856	5.90597	0.677037	0.498382	NA	ENSG00000265967	lncRNA
ENSG00000104313.20	73.3415	3.98991	0.745932	5.34889	8.84934e-08	5.33938e-06	EYA1	protein_coding
ENSG00000158486	7.24677	3.96968	1.52475	2.6035	0.00922779	0.0761032	DNAH3	protein_coding
ENSG00000286244.1	2.26091	3.91583	1.57223	2.49063	0.0127518	NA	ENSG00000286244	lncRNA
ENSG00000229955.1	1.16062	3.91092	1.80026	2.17242	0.029824	NA	ENSG00000229955	lncRNA
ENSG00000281348.1	1.70208	3.90756	2.50912	1.55734	0.119389	NA	ENSG00000281348	protein_coding
ENSG00000275322.1	4.3959	3.88033	1.36095	2.8512	0.00435549	NA	ENSG00000275322	lncRNA
ENSG00000287671.1	2.51478	3.86236	1.73429	2.22705	0.0259438	NA	ENSG00000287671	lncRNA
ENSG00000285212	2.14755	3.79575	1.73963	2.18193	0.0291145	NA	ENSG00000285212	lncRNA
ENSG00000270659	3.54535	3.79452	1.56887	2.41863	0.0155791	NA	ENSG00000270659	lncRNA
ENSG00000165269.13	2.52682	3.79276	1.87973	2.01772	0.0436208	NA	AQP7	protein_coding
ENSG00000229207.1	2.12663	3.78955	1.60192	2.36563	0.0179993	NA	SERPINH1P1	processed_pseudogene
ENSG00000204982.3	1.89132	3.78877	1.68758	2.24509	0.024762	NA	PRSS3P4	unprocessed_pseudogene
ENSG00000279932.1	1.03195	3.78619	2.67848	1.41356	0.157492	NA	ENSG00000279932	lncRNA
ENSG00000259992.1	0.773688	3.78217	5.90874	0.640098	0.522109	NA	ENSG00000259992	lncRNA
ENSG00000206028.1	2.07867	3.78154	1.68969	2.238	0.0252209	NA	ENSG00000206028	lncRNA
ENSG00000259318.1	2.85358	3.77528	1.66747	2.26408	0.0235691	NA	HMGN1P1	processed_pseudogene
ENSG00000259771.1	1.20217	3.77339	1.85634	2.0327	0.0420827	NA	ENSG00000259771	lncRNA
ENSG00000255910.2	0.771542	3.76415	2.63445	1.42882	0.153057	NA	ENSG00000255910	lncRNA
ENSG00000094963.14	0.91212	3.76065	3.24127	1.16024	0.245951	NA	FMO2	protein_coding
ENSG00000285612.1	1.22782	3.75946	1.97314	1.90532	0.0567382	NA	ENSG00000285612	lncRNA
ENSG00000272979.1	1.43883	3.75234	1.67442	2.24098	0.0250271	NA	ENSG00000272979	lncRNA
ENSG00000227008.2	0.593429	3.74742	3.74225	1.00138	0.316643	NA	RPS24P19	processed_pseudogene
ENSG00000188001.10	1.01348	3.74022	2.28299	1.63829	0.10136	NA	TPRG1	protein_coding
ENSG00000263257.3	1.25111	3.72523	2.04593	1.8208	0.0686375	NA	ENSG00000263257	lncRNA
ENSG00000112902.12	31.8746	3.72456	0.879984	4.23254	2.31072e-05	0.000669219	SEMA5A	protein_coding
ENSG00000285791.1	1.76355	3.66349	3.13287	1.16937	0.242254	NA	ENSG00000285791	protein_coding
ENSG00000248472.8	1.72318	3.65455	1.75518	2.08215	0.037329	NA	DDX11L9	transcribed_unprocessed_pseudogene
ENSG00000259884.1	0.515941	3.65098	5.67048	0.643857	0.519668	NA	NR4A1AS	lncRNA
ENSG00000170289.13	0.838377	3.64807	4.42109	0.825152	0.409285	NA	CNGB3	protein_coding
ENSG00000273294.1	3.02723	3.64419	4.4017	0.827905	0.407724	NA	C1QTNF3-AMACR	protein_coding
ENSG00000144130	0.865588	3.63263	2.65553	1.36795	0.171327	NA	NT5DC4	protein_coding
ENSG00000212464.1	0.720217	3.6307	2.38475	1.52247	0.127892	NA	SNORA12	snoRNA
ENSG00000217159.2	0.783096	3.62807	2.87661	1.26123	0.207225	NA	LARP1P1	processed_pseudogene
ENSG00000259424	2.30153	3.61897	1.92972	1.87539	0.0607396	NA	IRAIN	lncRNA
ENSG00000279399.1	0.327976	3.61383	5.91115	0.611358	0.540963	NA	ENSG00000279399	TEC
ENSG00000259941.1	1.98592	3.6108	2.87596	1.25551	0.209293	NA	ENSG00000259941	lncRNA
ENSG00000259783.6	1.01314	3.60925	2.09527	1.72257	0.0849671	NA	LINC02259	lncRNA
ENSG00000258045.2	1.51357	3.6071	1.73801	2.07542	0.0379479	NA	Metazoa_SRP	misc_RNA
ENSG00000145075.13	4.3801	3.60184	2.57894	1.39663	0.162524	NA	ENSG00000145075	lncRNA
ENSG00000265490.1	2.36341	3.59831	1.60188	2.2463	0.0246846	NA	ENSG00000265490	lncRNA
ENSG00000230772.1	1.31213	3.59249	2.22406	1.61529	0.106249	NA	VN1R108P	unprocessed_pseudogene
ENSG00000154096.14	770.1	3.58483	0.81157	4.41715	1.0001e-05	0.000327425	THY1	protein_coding
ENSG00000242220.9	12.9366	3.57867	0.851782	4.20139	2.65277e-05	0.000749827	TCP10L	protein_coding
ENSG00000269427.1	0.926481	3.56701	2.53839	1.40523	0.159954	NA	ENSG00000269427	lncRNA
ENSG00000234418	0.566449	3.54003	3.97046	0.891594	0.372611	NA	ENSG00000234418	lncRNA
ENSG00000138669.10	22.5379	3.52808	1.55432	2.26985	0.0232167	0.141901	PRKG2	protein_coding
ENSG00000152670.19	0.563886	3.49959	5.58516	0.626588	0.53093	NA	DDX4	protein_coding
ENSG00000150628.7	1.47437	3.49245	1.87471	1.86292	0.0624731	NA	SPATA4	protein_coding
ENSG00000163873.10	253.972	3.47796	1.63235	2.13065	0.0331183	0.177316	GRIK3	protein_coding
ENSG00000146006.8	51.4034	3.47566	0.864569	4.0201	5.8173e-05	0.00143904	LRRTM2	protein_coding
ENSG00000234232.7	1.3501	3.471	1.8876	1.83884	0.0659383	NA	PDE4DIPP7	transcribed_unprocessed_pseudogene
ENSG00000101134.12	34.7491	3.45951	1.40314	2.46554	0.0136807	0.0990893	DOK5	protein_coding
ENSG00000261575	1.58549	3.45177	1.77548	1.94414	0.0518788	NA	ENSG00000261575	transcribed_unprocessed_pseudogene
ENSG00000125675.20	4.53583	3.44746	1.39703	2.46771	0.013598	NA	GRIA3	protein_coding
ENSG00000143632.15	3.02874	3.44251	1.51147	2.27759	0.0227511	NA	ACTA1	protein_coding
ENSG00000264589	2.75933	3.43661	1.63182	2.106	0.0352042	NA	MAPT-AS1	lncRNA
ENSG00000279691.1	0.482682	3.43424	3.33808	1.02881	0.303571	NA	ENSG00000279691	TEC
ENSG00000285871.1	0.874638	3.43404	2.61349	1.31397	0.188858	NA	ENSG00000285871	lncRNA
ENSG00000125695.12	0.449944	3.4256	5.91415	0.579221	0.56244	NA	ENSG00000125695	protein_coding
ENSG00000257501	5.37344	3.42513	1.56928	2.18261	0.0290644	NA	PAFAH1B2P2	transcribed_processed_pseudogene
ENSG00000254370.1	0.659525	3.41938	3.27274	1.04481	0.296112	NA	ENSG00000254370	lncRNA
ENSG00000253356.1	0.650034	3.41926	3.40489	1.00422	0.315272	NA	ENSG00000253356	lncRNA
ENSG00000260664	1.83342	3.41572	1.76324	1.93718	0.0527237	NA	ENSG00000260664	lncRNA
ENSG00000236156.2	0.457441	3.41115	5.91439	0.576755	0.564105	NA	CHCHD4P3	processed_pseudogene
ENSG00000272472.1	1.86473	3.41104	1.73989	1.96049	0.0499383	NA	ENSG00000272472	lncRNA
ENSG00000263873.1	61.7906	3.41089	0.822278	4.1481	3.35239e-05	0.000911977	THY1-AS1	lncRNA
ENSG00000287129.1	1.43292	3.40796	1.67755	2.0315	0.0422041	NA	ENSG00000287129	lncRNA
ENSG00000233061.1	1.69765	3.40647	1.78613	1.90718	0.0564971	NA	TTLL7-IT1	lncRNA
ENSG00000243038.1	0.900512	3.40614	2.05197	1.65993	0.0969277	NA	ENSG00000243038	processed_pseudogene
ENSG00000244171.4	0.901706	3.40587	2.83169	1.20277	0.229066	NA	PBX2P1	processed_pseudogene
ENSG00000230585.2	1.45055	3.40208	1.66174	2.0473	0.0406284	NA	PHB1P12	processed_pseudogene
ENSG00000277971.1	1.16066	3.39725	2.69654	1.25986	0.207722	NA	ENSG00000277971	protein_coding
ENSG00000257069.6	18.6904	3.39425	1.4108	2.40591	0.0161324	0.111028	KCNK4-TEX40	lncRNA
ENSG00000232489.1	1.30641	3.39268	1.80677	1.87776	0.060414	NA	MFAP1P1	processed_pseudogene
ENSG00000270100.1	0.513778	3.39249	5.91461	0.573578	0.566253	NA	ENSG00000270100	lncRNA
ENSG00000259910.1	1.06998	3.38668	2.2915	1.47793	0.139427	NA	ENSG00000259910	lncRNA
ENSG00000233048.1	0.960848	3.38315	2.07503	1.63041	0.103015	NA	LINC01722	lncRNA
ENSG00000007314.12	1.8245	3.37237	2.44665	1.37836	0.168092	NA	SCN4A	protein_coding
ENSG00000165061.15	33.4932	3.37229	0.950496	3.54792	0.00038828	0.00688265	ZMAT4	protein_coding
ENSG00000179994.11	0.742192	3.36347	2.95312	1.13896	0.254722	NA	SPDYE7P	transcribed_unprocessed_pseudogene
ENSG00000242479.1	2.5346	3.35925	5.91535	0.567886	0.570112	NA	ENSG00000242479	processed_pseudogene
ENSG00000251634.2	0.612915	3.35872	5.91536	0.567796	0.570173	NA	NAIPP4	unprocessed_pseudogene
ENSG00000235790.7	1.32031	3.35844	1.7636	1.90431	0.0568705	NA	PEF1-AS1	lncRNA
ENSG00000140538	163.779	3.35824	1.03736	3.2373	0.00120668	0.0167717	NTRK3	protein_coding
ENSG00000274322.1	1.57248	3.34234	2.02288	1.65226	0.0984811	NA	ENSG00000274322	protein_coding
ENSG00000240253.6	8.8541	3.33526	1.42988	2.33254	0.0196723	0.127098	FAR2P3	transcribed_unprocessed_pseudogene
ENSG00000278416.1	2.20849	3.33371	1.64108	2.0314	0.0422139	NA	PMS2P2	translated_unprocessed_pseudogene
ENSG00000229153	1.83033	3.32884	1.87642	1.77404	0.0760572	NA	EPHA1-AS1	lncRNA
ENSG00000254180.2	1.03892	3.31283	2.33979	1.41587	0.156815	NA	ENSG00000254180	lncRNA
ENSG00000075388.4	8.4984	3.29854	1.71729	1.92079	0.0547586	0.247048	FGF4	protein_coding
ENSG00000197067.6	0.998583	3.29217	1.959	1.68054	0.0928526	NA	OR2T32P	transcribed_unprocessed_pseudogene
ENSG00000100078.4	12.4846	3.28602	0.974177	3.37312	0.000743209	0.0114586	PLA2G3	protein_coding
ENSG00000277020.4	1.15961	3.2724	1.84258	1.77599	0.0757342	NA	ENSG00000277020	lncRNA
ENSG00000238363.1	0.917182	3.26463	2.74533	1.18916	0.234378	NA	SNORA13	snoRNA
ENSG00000112053.14	2.44696	3.25879	1.40126	2.32562	0.0200389	NA	SLC26A8	protein_coding
ENSG00000287722.1	1.90122	3.24035	1.95026	1.6615	0.0966131	NA	ENSG00000287722	lncRNA
ENSG00000258232.2	1.70736	3.23301	2.76616	1.16877	0.242496	NA	ENSG00000258232	lncRNA
ENSG00000269578.1	0.843803	3.22896	4.38862	0.735757	0.461879	NA	ENSG00000269578	lncRNA
ENSG00000231095.1	0.414229	3.22779	5.91784	0.545433	0.585456	NA	GYG1P3	processed_pseudogene
ENSG00000228352.2	2.62548	3.22621	1.44681	2.22988	0.0257552	NA	ENSG00000228352	lncRNA
ENSG00000254740.2	0.673305	3.22455	5.552	0.580792	0.561381	NA	ENSG00000254740	lncRNA
ENSG00000287856.1	3.71364	3.22422	2.98448	1.08033	0.279996	NA	ENSG00000287856	protein_coding
ENSG00000187151.7	0.796157	3.22224	2.98045	1.08112	0.279642	NA	ANGPTL5	protein_coding
ENSG00000249241	1.81209	3.21735	2.04324	1.57463	0.115341	NA	LINC02265	lncRNA
ENSG00000197238.5	0.248712	3.2144	5.91812	0.543145	0.58703	NA	H4C11	protein_coding
ENSG00000205693.4	0.539162	3.21045	3.88079	0.827267	0.408086	NA	MANSC4	protein_coding
ENSG00000108342.13	0.700987	3.21022	3.21123	0.999684	0.317463	NA	CSF3	protein_coding
ENSG00000214192.3	0.92064	3.20905	3.36693	0.953109	0.340535	NA	UBE2V1P2	processed_pseudogene
ENSG00000234869.1	2.29646	3.20865	1.57032	2.04332	0.0410212	NA	LINC02925	lncRNA
ENSG00000277867.1	1.18976	3.20714	2.49834	1.28371	0.199245	NA	ENSG00000277867	processed_pseudogene
ENSG00000280026.1	0.247398	3.20692	5.91827	0.541867	0.58791	NA	ENSG00000280026	lncRNA
ENSG00000274419	0.808442	3.20635	3.69615	0.867483	0.385677	NA	TBC1D3D	protein_coding
ENSG00000286805.1	0.771718	3.20493	2.98089	1.07516	0.282304	NA	ENSG00000286805	lncRNA
ENSG00000243836	8.03597	3.20263	1.20492	2.65796	0.00786164	0.0684213	WDR86-AS1	lncRNA
ENSG00000275374.1	0.730943	3.2	2.1901	1.46112	0.143983	NA	GUSBP19	unprocessed_pseudogene
ENSG00000231841.1	0.908156	3.19514	1.97872	1.61475	0.106364	NA	FAM192BP	processed_pseudogene
ENSG00000274441.1	0.561863	3.19457	3.24931	0.983152	0.325533	NA	ENSG00000274441	lncRNA
ENSG00000224174.2	0.721354	3.19449	5.91849	0.539748	0.589371	NA	ENSG00000224174	lncRNA
ENSG00000288547.3	0.93013	3.19405	2.59165	1.23244	0.217785	NA	C3orf36	lncRNA
ENSG00000186136.1	0.654151	3.19212	2.93609	1.0872	0.276948	NA	TAS2R42	protein_coding
ENSG00000253813.1	0.568535	3.19003	2.29618	1.38928	0.164749	NA	COX6B1P4	processed_pseudogene
ENSG00000124749.17	2.85525	3.1893	1.56787	2.03416	0.0419356	NA	COL21A1	protein_coding
ENSG00000285735.2	0.414559	3.18728	3.99694	0.797428	0.425202	NA	LINC02717	lncRNA
ENSG00000286458.1	0.725525	3.18702	1.95734	1.62824	0.103473	NA	ENSG00000286458	lncRNA
ENSG00000261359.2	0.736625	3.18541	3.31039	0.962246	0.335926	NA	PYCARD-AS1	lncRNA
ENSG00000286272.1	0.651231	3.18473	2.15477	1.47799	0.13941	NA	ENSG00000286272	lncRNA
ENSG00000267335.2	1.82006	3.182	1.99538	1.59468	0.110783	NA	ENSG00000267335	protein_coding
ENSG00000275297.1	1.79911	3.18002	1.9963	1.59296	0.111169	NA	ENSG00000275297	lncRNA
ENSG00000115353.11	14.6487	3.17895	1.27341	2.4964	0.0125462	0.0936278	TACR1	protein_coding
ENSG00000234937.1	0.518603	3.17796	2.85022	1.11499	0.264856	NA	ENSG00000234937	processed_pseudogene
ENSG00000230911.1	1.05924	3.17724	1.84398	1.72304	0.0848813	NA	PPIHP1	processed_pseudogene
ENSG00000203910.9	0.611087	3.17627	2.52234	1.25925	0.207939	NA	C1orf146	protein_coding
ENSG00000272163	2.54248	3.17591	1.69913	1.86914	0.0616032	NA	ENSG00000272163	lncRNA
ENSG00000231882.1	0.623241	3.17231	2.91687	1.08757	0.276784	NA	F10-AS1	lncRNA
ENSG00000214102.7	1.33805	3.17138	2.52982	1.2536	0.209989	NA	WEE2	protein_coding
ENSG00000259087.5	0.679994	3.16932	2.687	1.1795	0.238198	NA	ENSG00000259087	lncRNA
ENSG00000257052.1	0.834171	3.16701	2.06902	1.53068	0.125848	NA	PRPF19-DT	lncRNA
ENSG00000227240.2	0.393672	3.16683	5.91807	0.535113	0.592572	NA	ENSG00000227240	lncRNA
ENSG00000107165.13	0.338822	3.16487	5.11249	0.619046	0.535886	NA	TYRP1	protein_coding
ENSG00000280299.1	1.22154	3.16285	2.86192	1.10515	0.269095	NA	ENSG00000280299	lncRNA
ENSG00000254229	1.18961	3.1583	2.60728	1.21134	0.225766	NA	FAM90A12P	protein_coding
ENSG00000157064.11	2.96511	3.15476	1.61248	1.95647	0.0504097	NA	NMNAT2	protein_coding
ENSG00000229519.2	1.89599	3.15449	1.76296	1.78931	0.0735643	NA	ENSG00000229519	processed_pseudogene
ENSG00000256802	4.40855	3.14404	1.92899	1.62988	0.103126	NA	ENSG00000256802	lncRNA
ENSG00000226440.7	1.38872	3.14202	1.8188	1.72752	0.0840738	NA	LAMA4-AS1	lncRNA
ENSG00000287292.1	0.94622	3.13799	2.23479	1.40415	0.160273	NA	ENSG00000287292	lncRNA
ENSG00000267058.1	1.57451	3.13141	2.05451	1.52416	0.127468	NA	ENSG00000267058	lncRNA
ENSG00000204583.10	1.61773	3.12846	2.32371	1.34632	0.178199	NA	LRCOL1	protein_coding
ENSG00000213543.2	2.28488	3.12673	2.37603	1.31595	0.188191	NA	RARRES2P2	processed_pseudogene
ENSG00000268870.1	3.69554	3.1142	1.86825	1.66691	0.0955331	NA	ENSG00000268870	protein_coding
ENSG00000157703.16	3.80264	3.11269	1.93818	1.60598	0.108278	NA	SVOPL	protein_coding
ENSG00000172058.16	185.457	3.11267	0.905541	3.43736	0.000587422	0.00950836	SERF1A	protein_coding
ENSG00000183454.18	2.57734	3.10718	2.27161	1.36783	0.171366	NA	GRIN2A	protein_coding
ENSG00000139973	43.5325	3.10576	1.34912	2.30207	0.0213312	0.133542	SYT16	protein_coding
ENSG00000287843.1	2.90031	3.10533	1.43027	2.17115	0.0299195	NA	ENSG00000287843	lncRNA
ENSG00000156510.13	3.04736	3.10246	2.10949	1.47071	0.141369	NA	HKDC1	protein_coding
ENSG00000231924.10	1.68611	3.08573	2.16424	1.42578	0.153932	NA	PSG1	protein_coding
ENSG00000285976.2	1261.13	3.08104	0.959932	3.20964	0.001329	0.0181292	ENSG00000285976	protein_coding
ENSG00000273433.1	8.18116	3.06401	1.79746	1.70463	0.0882636	0.330199	ENSG00000273433	lncRNA
ENSG00000254718.6	2.84994	3.05971	1.91707	1.59603	0.110482	NA	ENSG00000254718	lncRNA
ENSG00000203999	4.91196	3.0584	1.39286	2.19577	0.0281083	NA	LINC01270	lncRNA
ENSG00000214946	0.470231	3.05636	5.91047	0.51711	0.605079	NA	TBC1D26	protein_coding
ENSG00000030419.17	49.9071	3.05418	0.688024	4.43906	9.03544e-06	0.000300516	IKZF2	protein_coding
ENSG00000260628	1.29165	3.05204	2.39686	1.27335	0.202894	NA	ENSG00000260628	transcribed_unprocessed_pseudogene
ENSG00000285774	1.88715	3.04585	2.04006	1.49302	0.135431	NA	SAMD4A-AS1	lncRNA
ENSG00000287276.1	2.78414	3.02394	1.54257	1.96033	0.0499576	NA	CNTNAP3P7	transcribed_unprocessed_pseudogene
ENSG00000242615.1	0.799989	3.01611	3.18659	0.9465	0.343894	NA	ENSG00000242615	transcribed_processed_pseudogene
ENSG00000259986	0.448059	3.00091	4.03402	0.7439	0.456937	NA	ENSG00000259986	lncRNA
ENSG00000104321.11	15.028	2.99233	1.55414	1.92539	0.0541803	0.245297	TRPA1	protein_coding
ENSG00000254721.1	0.841961	2.98425	2.71373	1.09968	0.27147	NA	ENSG00000254721	lncRNA
ENSG00000077274.9	7.49809	2.98291	1.62829	1.83193	0.0669623	0.278639	CAPN6	protein_coding
ENSG00000274618.2	0.623331	2.97996	3.09923	0.961515	0.336293	NA	H4C6	protein_coding
ENSG00000229563.7	3.48309	2.97861	1.71077	1.74109	0.0816671	NA	LINC01204	lncRNA
ENSG00000280758.1	3.18773	2.97261	1.39594	2.12947	0.0332155	NA	ENSG00000280758	lncRNA
ENSG00000261898.2	1.22465	2.97168	2.04736	1.45147	0.14665	NA	ENSG00000261898	lncRNA
ENSG00000276232.1	0.209525	2.96662	5.92352	0.50082	0.616498	NA	ENSG00000276232	lncRNA
ENSG00000241499.1	0.382359	2.96629	5.92352	0.500765	0.616537	NA	ENSG00000241499	processed_pseudogene
ENSG00000263427.1	0.441068	2.9588	4.85876	0.608961	0.54255	NA	ENSG00000263427	lncRNA
ENSG00000287990.1	4.39916	2.95622	1.436	2.05865	0.0395279	NA	ENSG00000287990	lncRNA
ENSG00000283101.1	1.32719	2.95499	3.05139	0.968408	0.332841	NA	BMS1P21	transcribed_unprocessed_pseudogene
ENSG00000287894.1	0.33192	2.95499	5.92381	0.498832	0.617897	NA	ENSG00000287894	lncRNA
ENSG00000271021.1	0.853565	2.95469	2.43552	1.21316	0.225068	NA	ENSG00000271021	processed_pseudogene
ENSG00000185527.12	0.494061	2.95291	3.47712	0.849241	0.395747	NA	PDE6G	protein_coding
ENSG00000259453.1	0.357062	2.95273	5.92386	0.498447	0.618169	NA	ENSG00000259453	lncRNA
ENSG00000230806.1	3.7474	2.95208	1.69845	1.7381	0.0821939	NA	SRGAP2-AS1	lncRNA
ENSG00000232218.1	1.42359	2.95074	1.9	1.55302	0.120419	NA	ENSG00000232218	unprocessed_pseudogene
ENSG00000250902.1	0.362029	2.94206	5.92416	0.49662	0.619457	NA	SMAD1-AS1	lncRNA
ENSG00000267006.1	0.864344	2.94157	2.09527	1.40391	0.160346	NA	ENSG00000267006	lncRNA
ENSG00000228189.5	0.637565	2.94107	3.44337	0.854126	0.393035	NA	LINC02843	lncRNA
ENSG00000279509.1	0.774967	2.94099	2.74569	1.07113	0.284112	NA	ENSG00000279509	TEC
ENSG00000232492.1	0.726737	2.93923	2.93975	0.999825	0.317395	NA	NPM1P13	processed_pseudogene
ENSG00000257759.2	0.953446	2.93791	2.17115	1.35316	0.176005	NA	ENSG00000257759	lncRNA
ENSG00000286655.1	1.56403	2.93651	1.75469	1.67352	0.0942247	NA	ENSG00000286655	lncRNA
ENSG00000234431.2	0.204985	2.93578	5.92426	0.495552	0.62021	NA	ENSG00000234431	lncRNA
ENSG00000260118.1	0.916798	2.93548	1.95421	1.50213	0.133064	NA	ENSG00000260118	lncRNA
ENSG00000265533.1	1.07795	2.93341	2.16905	1.35239	0.17625	NA	DSEL-AS1	lncRNA
ENSG00000198691	2.22281	2.93281	1.85388	1.58198	0.113654	NA	ABCA4	protein_coding
ENSG00000276809.1	0.859323	2.93216	2.37636	1.23389	0.217245	NA	ENSG00000276809	lncRNA
ENSG00000187550.9	1.17635	2.93203	1.92969	1.51943	0.128655	NA	SBK2	protein_coding
ENSG00000222627.1	0.363688	2.93196	5.92436	0.4949	0.620671	NA	RNU2-37P	snRNA
ENSG00000224232.1	0.725995	2.93168	1.89252	1.54909	0.12136	NA	KCTD5P1	processed_pseudogene
ENSG00000257520.2	0.287962	2.93138	5.92433	0.494804	0.620739	NA	SFTA3	protein_coding
ENSG00000258044.1	1.01973	2.9311	2.00483	1.46202	0.143736	NA	ENSG00000258044	lncRNA
ENSG00000273342.1	0.482628	2.93024	3.918	0.747893	0.454525	NA	ENSG00000273342	lncRNA
ENSG00000267090.1	0.240329	2.92995	5.92435	0.494561	0.62091	NA	ENSG00000267090	lncRNA
ENSG00000237217.1	1.09771	2.92962	1.85082	1.58288	0.113448	NA	ENSG00000237217	processed_pseudogene
ENSG00000272541.1	0.522343	2.92926	2.62419	1.11625	0.264314	NA	ENSG00000272541	lncRNA
ENSG00000164411.12	2.13965	2.92732	2.0533	1.42566	0.153965	NA	GJB7	protein_coding
ENSG00000177291.4	0.687261	2.92628	2.41344	1.21249	0.225324	NA	GJD4	protein_coding
ENSG00000285330.1	1.78177	2.92455	2.33126	1.25449	0.209663	NA	ENSG00000285330	protein_coding
ENSG00000271204.1	0.912742	2.92439	3.29424	0.887727	0.374687	NA	ENSG00000271204	lncRNA
ENSG00000217442.4	1.13466	2.92401	2.00701	1.4569	0.145144	NA	SYCE3	protein_coding
ENSG00000278875.1	2.5281	2.92388	1.93076	1.51437	0.129933	NA	ENSG00000278875	TEC
ENSG00000244239.1	2.93839	2.92357	1.66264	1.75839	0.0786808	NA	ICA1-AS1	lncRNA
ENSG00000273771.1	0.544875	2.92355	3.16434	0.923905	0.355536	NA	ENSG00000273771	lncRNA
ENSG00000229251.3	0.741349	2.92168	3.00091	0.973597	0.330257	NA	HNRNPA1P8	processed_pseudogene
ENSG00000213228.5	2.31991	2.92099	1.63806	1.7832	0.074554	NA	RPL12P38	transcribed_processed_pseudogene
ENSG00000245598	1.99459	2.92039	2.04332	1.42923	0.152937	NA	DACT3-AS1	lncRNA
ENSG00000203286.5	0.800761	2.91945	2.93931	0.993243	0.320591	NA	Metazoa_SRP	misc_RNA
ENSG00000229659.1	2.76124	2.91939	1.53209	1.90549	0.0567158	NA	RPL26P6	processed_pseudogene
ENSG00000254653.1	0.611665	2.91843	3.47962	0.838721	0.401626	NA	ENSG00000254653	lncRNA
ENSG00000268533.1	1.57411	2.91423	2.3078	1.26277	0.206671	NA	ENSG00000268533	protein_coding
ENSG00000151079	3.58107	2.91374	1.81099	1.60892	0.107633	NA	KCNA6	protein_coding
ENSG00000287855.1	1.84267	2.91341	1.5681	1.85792	0.0631801	NA	ENSG00000287855	lncRNA
ENSG00000187581.3	0.910247	2.91312	2.1428	1.35949	0.17399	NA	COX8C	protein_coding
ENSG00000256364.1	0.397424	2.9121	4.87665	0.597151	0.550406	NA	ENSG00000256364	lncRNA
ENSG00000227495.1	1.09946	2.9102	1.81015	1.60771	0.107899	NA	KIF1C-AS1	lncRNA
ENSG00000251468.2	1.68286	2.90895	1.76963	1.64382	0.100214	NA	ENSG00000251468	unprocessed_pseudogene
ENSG00000233196.2	0.448969	2.90889	4.8364	0.601457	0.547536	NA	ENSG00000233196	processed_pseudogene
ENSG00000231464.1	1.91421	2.90785	1.9809	1.46794	0.14212	NA	ENSG00000231464	processed_pseudogene
ENSG00000154080.14	50.4545	2.90498	0.523929	5.54461	2.9461e-08	2.03898e-06	CHST9	protein_coding
ENSG00000231024.1	1.09855	2.9043	1.93489	1.50102	0.133351	NA	ENSG00000231024	lncRNA
ENSG00000069188.17	112.51	2.90233	1.20846	2.40166	0.0163207	0.111967	SDK2	protein_coding
ENSG00000276542.1	1.0289	2.89822	2.08066	1.39293	0.163641	NA	ENSG00000276542	lncRNA
ENSG00000249328.3	1.01766	2.89573	2.22663	1.3005	0.19343	NA	ENSG00000249328	lncRNA
ENSG00000268434.5	0.810273	2.89541	2.23933	1.29298	0.196018	NA	ENSG00000268434	protein_coding
ENSG00000258520.1	1.46914	2.89534	1.7042	1.69895	0.0893291	NA	ENSG00000258520	lncRNA
ENSG00000116882.15	0.322792	2.89216	5.9247	0.488153	0.625442	NA	HAO2	protein_coding
ENSG00000232491.1	0.513658	2.88909	3.39794	0.850248	0.395187	NA	SAPCD2P3	processed_pseudogene
ENSG00000240589.3	1.22002	2.88902	2.12313	1.36073	0.173598	NA	RN7SL258P	misc_RNA
ENSG00000272966.1	0.567831	2.8784	3.00294	0.958527	0.337797	NA	ENSG00000272966	lncRNA
ENSG00000261459.1	3.03691	2.87384	4.29657	0.66887	0.503579	NA	ENSG00000261459	protein_coding
ENSG00000278981.1	0.280247	2.87361	5.92576	0.484935	0.627722	NA	ENSG00000278981	lncRNA
ENSG00000257910.1	0.830995	2.87324	2.67531	1.07398	0.28283	NA	ENSG00000257910	lncRNA
ENSG00000170476.16	1.50209	2.87301	1.79045	1.60463	0.108575	NA	MZB1	protein_coding
ENSG00000169885.10	3.27652	2.86467	1.57902	1.81421	0.0696453	NA	CALML6	protein_coding
ENSG00000227681.5	0.770058	2.86129	3.88253	0.736965	0.461144	NA	ENSG00000227681	lncRNA
ENSG00000258927.2	1.21123	2.85838	2.35108	1.21577	0.224071	NA	ENSG00000258927	lncRNA
ENSG00000268650.3	2.24861	2.857	2.07153	1.37918	0.167841	NA	ENSG00000268650	lncRNA
ENSG00000161270.20	4.88747	2.85509	1.42127	2.00883	0.0445554	NA	NPHS1	protein_coding
ENSG00000172005.11	1.71287	2.85194	2.04258	1.39624	0.162641	NA	MAL	protein_coding
ENSG00000256751.6	0.643891	2.84601	2.68761	1.05894	0.289628	NA	PLBD1-AS1	lncRNA
ENSG00000181291.8	787.52	2.84423	0.853124	3.3339	0.000856374	0.0128677	TMEM132E	protein_coding
ENSG00000145063.15	5.32311	2.84131	1.15492	2.46017	0.0138871	NA	ENSG00000145063	lncRNA
ENSG00000261873.2	0.642343	2.83823	4.72762	0.60035	0.548273	NA	SMIM36	protein_coding
ENSG00000261468.1	1.77853	2.83325	1.4676	1.93053	0.0535415	NA	ENSG00000261468	lncRNA
ENSG00000287624.1	1.25783	2.83283	1.81211	1.56328	0.117988	NA	ENSG00000287624	lncRNA
ENSG00000204175	2.05778	2.83016	2.11836	1.33601	0.181546	NA	GPRIN2	protein_coding
ENSG00000276925.1	1.48653	2.82555	1.54942	1.82362	0.0682092	NA	ENSG00000276925	processed_pseudogene
ENSG00000259165.1	2.34241	2.81955	1.44752	1.94785	0.0514325	NA	DDX18P1	processed_pseudogene
ENSG00000239268	4.9129	2.81939	1.47933	1.90586	0.0566688	NA	ENSG00000239268	lncRNA
ENSG00000235934.2	12.6953	2.81458	1.0042	2.80282	0.00506579	0.0498115	ENSG00000235934	lncRNA
ENSG00000276810.1	0.976527	2.81165	2.1214	1.32537	0.185047	NA	ENSG00000276810	processed_pseudogene
ENSG00000229064.1	1.99055	2.80113	1.53835	1.82087	0.0686264	NA	ENSG00000229064	processed_pseudogene
ENSG00000257242	2.60639	2.80017	1.44578	1.93679	0.052771	NA	LINC01619	lncRNA
ENSG00000258876.1	1.06993	2.78965	2.07752	1.34278	0.179344	NA	TGFB3-AS1	lncRNA
ENSG00000132975.8	39.3899	2.78297	0.987755	2.81747	0.00484041	0.0480743	GPR12	protein_coding
ENSG00000278254.4	1.77033	2.77	1.88065	1.47289	0.14078	NA	ENSG00000278254	lncRNA
ENSG00000241754.2	1.66902	2.76835	1.5291	1.81045	0.070226	NA	ENSG00000241754	lncRNA
ENSG00000177337	19.2725	2.76597	0.881086	3.13928	0.00169365	0.0217631	DLGAP1-AS1	lncRNA
ENSG00000266605.1	1.84059	2.76238	2.06079	1.34045	0.1801	NA	LONRF2P1	processed_pseudogene
ENSG00000215845.11	3.12665	2.75624	1.33384	2.06639	0.038792	NA	TSTD1	protein_coding
ENSG00000132681.17	0.634063	2.74912	2.9811	0.922181	0.356434	NA	ATP1A4	protein_coding
ENSG00000201376.1	0.43662	2.74762	4.06124	0.676548	0.498693	NA	SNORA70	snoRNA
ENSG00000226194	1.00696	2.74684	2.69937	1.01759	0.308875	NA	LINC02519	lncRNA
ENSG00000229941.6	19.624	2.74574	1.27182	2.1589	0.0308579	0.169606	PDE11A-AS1	lncRNA
ENSG00000124882.4	2.09831	2.72954	1.75431	1.5559	0.119731	NA	EREG	protein_coding
ENSG00000106302.10	0.584998	2.71828	3.12942	0.868621	0.385054	NA	HYAL4	protein_coding
ENSG00000021488.13	2.07393	2.71349	1.63323	1.66142	0.0966286	NA	SLC7A9	protein_coding
ENSG00000249717.1	0.543135	2.71027	2.69626	1.00519	0.314804	NA	PARM1-AS1	lncRNA
ENSG00000276077.4	23.5685	2.70124	2.53123	1.06716	0.285899	0.619481	ENSG00000276077	lncRNA
ENSG00000172348	7.61659	2.69926	1.70732	1.58099	0.113881	0.382209	RCAN2	protein_coding
ENSG00000205266.10	1.95395	2.68885	2.2001	1.22215	0.221651	NA	KRT17P5	transcribed_unprocessed_pseudogene
ENSG00000204965.9	1.58009	2.68188	2.19425	1.22223	0.221621	NA	PCDHA5	protein_coding
ENSG00000118520.15	0.385886	2.67437	5.93646	0.4505	0.65235	NA	ARG1	protein_coding
ENSG00000187546.14	0.514188	2.67352	3.5364	0.756002	0.449648	NA	AGMO	protein_coding
ENSG00000196754.13	1.21328	2.65897	2.05921	1.29125	0.196616	NA	S100A2	protein_coding
ENSG00000152578.13	14.7444	2.65558	1.62843	1.63076	0.10294	0.361269	GRIA4	protein_coding
ENSG00000254230.1	0.746458	2.65439	5.33508	0.497536	0.618811	NA	ENSG00000254230	lncRNA
ENSG00000285952.1	1.67845	2.64873	5.93198	0.446516	0.655224	NA	ENSG00000285952	lncRNA
ENSG00000174225.15	0.529914	2.64852	4.00418	0.661438	0.508331	NA	ARL13A	protein_coding
ENSG00000260425.1	0.335206	2.64584	5.93204	0.446026	0.655578	NA	ENSG00000260425	lncRNA
ENSG00000280070.1	0.989126	2.64547	2.18861	1.20874	0.226762	NA	ENSG00000280070	TEC
ENSG00000227609.2	0.16762	2.6445	5.93206	0.445798	0.655743	NA	TMEM183AP1	processed_pseudogene
ENSG00000266905.1	0.16762	2.6445	5.93206	0.445798	0.655743	NA	ENSG00000266905	lncRNA
ENSG00000250111.3	1.22259	2.64422	5.93207	0.44575	0.655778	NA	ENSG00000250111	unprocessed_pseudogene
ENSG00000260845.1	1.10295	2.64395	3.25724	0.811717	0.416954	NA	ENSG00000260845	lncRNA
ENSG00000260070.1	2.1096	2.64157	1.48902	1.77403	0.0760583	NA	ENSG00000260070	lncRNA
ENSG00000234577.1	0.452306	2.64073	5.93213	0.445156	0.656207	NA	SYNE1-AS1	lncRNA
ENSG00000262480.2	0.536738	2.64036	3.53878	0.746121	0.455594	NA	SAMD11P1	processed_pseudogene
ENSG00000280068.1	1.21815	2.63988	2.50932	1.05203	0.292787	NA	ENSG00000280068	TEC
ENSG00000255308.1	0.589016	2.63972	3.53799	0.746107	0.455603	NA	CSRP3-AS1	lncRNA
ENSG00000233728.1	1.3328	2.63971	3.16401	0.834292	0.404117	NA	ENSG00000233728	lncRNA
ENSG00000286939.1	0.292643	2.63895	5.93226	0.444847	0.65643	NA	ENSG00000286939	lncRNA
ENSG00000267144.2	0.518328	2.63895	4.07586	0.647459	0.517335	NA	ZNF222-DT	lncRNA
ENSG00000287280.1	0.292096	2.63843	5.93227	0.444759	0.656494	NA	ENSG00000287280	lncRNA
ENSG00000287029.1	0.703224	2.63334	2.81222	0.936393	0.349071	NA	ENSG00000287029	lncRNA
ENSG00000223692.1	1.11486	2.63226	2.72275	0.966763	0.333663	NA	DIP2A-IT1	lncRNA
ENSG00000226625.1	0.567533	2.6319	3.93612	0.668654	0.503716	NA	RBM17P1	processed_pseudogene
ENSG00000168621.15	16.1845	2.63134	1.51906	1.73221	0.0832364	0.318039	GDNF	protein_coding
ENSG00000253671.3	2.81884	2.63119	1.56233	1.68415	0.0921526	NA	ENSG00000253671	lncRNA
ENSG00000287700	0.370905	2.62863	5.93252	0.443088	0.657702	NA	ENSG00000287700	lncRNA
ENSG00000272428.1	0.938807	2.62756	1.91557	1.37169	0.170161	NA	ENSG00000272428	lncRNA
ENSG00000248228.2	0.487619	2.62738	3.45549	0.760349	0.447046	NA	SLIT2-IT1	lncRNA
ENSG00000286577.1	0.938175	2.62628	2.20359	1.19182	0.233333	NA	ENSG00000286577	lncRNA
ENSG00000261826.1	1.21262	2.6253	1.88808	1.39046	0.16439	NA	ENSG00000261826	lncRNA
ENSG00000244063.1	0.406534	2.62468	4.1156	0.637739	0.523644	NA	ENSG00000244063	lncRNA
ENSG00000185499	70.7705	2.62433	0.58262	4.50437	6.65714e-06	0.000234244	MUC1	protein_coding
ENSG00000264529.1	0.461618	2.62356	4.89698	0.535752	0.59213	NA	DNAJB6P8	transcribed_processed_pseudogene
ENSG00000234537.1	2.21045	2.62356	1.8005	1.45713	0.145081	NA	ENSG00000234537	unprocessed_pseudogene
ENSG00000179256.2	2.28833	2.62253	1.63856	1.60051	0.109485	NA	SMCO3	protein_coding
ENSG00000283183	15.9298	2.62163	1.61723	1.62106	0.105004	0.364773	ENSG00000283183	lncRNA
ENSG00000250378.4	1.4435	2.6213	2.29603	1.14167	0.253592	NA	ENSG00000250378	lncRNA
ENSG00000224566.2	0.623631	2.62103	2.66637	0.982994	0.32561	NA	CIAO2AP2	processed_pseudogene
ENSG00000224220.1	0.364499	2.62068	5.93265	0.441738	0.658679	NA	DTNB-AS1	lncRNA
ENSG00000231982.1	0.445061	2.61808	4.09108	0.63995	0.522205	NA	ENSG00000231982	unprocessed_pseudogene
ENSG00000222640.1	0.361354	2.61763	3.51442	0.744824	0.456378	NA	RNU2-51P	snRNA
ENSG00000250039.4	0.534494	2.61726	3.02086	0.866398	0.386272	NA	ENSG00000250039	lncRNA
ENSG00000214043.8	0.82568	2.61681	2.03494	1.28594	0.198464	NA	LINC02347	lncRNA
ENSG00000196436	1.86582	2.61659	1.66083	1.57548	0.115146	NA	NPIPB15	protein_coding
ENSG00000188937	1.5609	2.61622	2.53093	1.0337	0.301278	NA	NYX	protein_coding
ENSG00000232369.1	0.506778	2.61486	3.99731	0.654156	0.513011	NA	PPIAP35	processed_pseudogene
ENSG00000231548.2	1.66976	2.61415	1.73835	1.50381	0.132629	NA	OR55B1P	transcribed_unitary_pseudogene
ENSG00000238258.1	1.81811	2.61398	1.92067	1.36097	0.173523	NA	ENSG00000238258	lncRNA
ENSG00000203472.3	0.163988	2.61385	5.93298	0.440562	0.65953	NA	ENSG00000203472	lncRNA
ENSG00000225881.2	0.163988	2.61385	5.93298	0.440562	0.65953	NA	ENSG00000225881	lncRNA
ENSG00000278289.5	0.163988	2.61385	5.93298	0.440562	0.65953	NA	CT45A6	protein_coding
ENSG00000279296.1	0.764066	2.61353	5.93298	0.440509	0.659569	NA	PRAL	TEC
ENSG00000257452.1	0.366849	2.61343	4.21466	0.62008	0.535205	NA	ENSG00000257452	lncRNA
ENSG00000251380.3	0.827673	2.6128	5.33945	0.48934	0.624601	NA	DCANP1	protein_coding
ENSG00000225408.1	0.243916	2.61186	5.93274	0.440246	0.659759	NA	ENSG00000225408	lncRNA
ENSG00000132437.18	2.394	2.61181	1.71131	1.52621	0.126958	NA	DDC	protein_coding
ENSG00000251370.1	0.205713	2.61133	5.93303	0.440134	0.65984	NA	SEMA5A-AS1	lncRNA
ENSG00000253308.2	1.50555	2.61129	1.78457	1.46326	0.143396	NA	ENSG00000253308	lncRNA
ENSG00000260988.1	1.27334	2.60906	1.87584	1.39088	0.164262	NA	ENSG00000260988	lncRNA
ENSG00000254339	1.30557	2.60616	1.97507	1.31953	0.186992	NA	ENSG00000254339	lncRNA
ENSG00000223668.1	1.35134	2.60613	1.75922	1.48141	0.138498	NA	EEF1A1P24	processed_pseudogene
ENSG00000256737.1	0.566684	2.60523	3.36073	0.775199	0.438222	NA	RBBP4P5	processed_pseudogene
ENSG00000259592.1	0.499682	2.60244	2.63515	0.987588	0.323354	NA	PRELID1P4	processed_pseudogene
ENSG00000250892.1	0.890182	2.60208	2.32419	1.11957	0.262899	NA	ENSG00000250892	unprocessed_pseudogene
ENSG00000189280.3	0.975317	2.60144	2.20238	1.18119	0.237526	NA	GJB5	protein_coding
ENSG00000266371.1	0.808456	2.60098	2.23588	1.16329	0.244712	NA	ENSG00000266371	lncRNA
ENSG00000230449.1	0.687715	2.60046	2.43057	1.0699	0.284666	NA	RPL7P4	processed_pseudogene
ENSG00000273173	0.162374	2.59999	5.9334	0.438196	0.661244	NA	SNURF	protein_coding
ENSG00000185565.12	52.1698	2.59976	1.46364	1.77623	0.0756945	0.300698	LSAMP	protein_coding
ENSG00000212163.6	1.1324	2.59913	2.043	1.27221	0.203298	NA	SNORD91A	snoRNA
ENSG00000107242.20	113.159	2.59878	0.477384	5.4438	5.21562e-08	3.36247e-06	PIP5K1B	protein_coding
ENSG00000287301	1.72384	2.59877	1.69963	1.52902	0.12626	NA	ENSG00000287301	lncRNA
ENSG00000226899.1	0.404359	2.59848	4.9363	0.526403	0.598608	NA	ENSG00000226899	lncRNA
ENSG00000232587.1	1.54569	2.59779	1.96456	1.32233	0.186059	NA	EEF1A1P3	processed_pseudogene
ENSG00000242052.1	0.213118	2.59763	5.9333	0.437805	0.661527	NA	RPL10P7	processed_pseudogene
ENSG00000234961.1	1.42149	2.59734	1.79275	1.4488	0.147394	NA	ENSG00000234961	lncRNA
ENSG00000242960.1	1.86558	2.59664	1.76138	1.47421	0.140424	NA	FTH1P23	processed_pseudogene
ENSG00000274827.4	1.14378	2.59653	2.02077	1.28492	0.198819	NA	LINC01297	lncRNA
ENSG00000263410.2	0.36934	2.5959	4.16479	0.623297	0.533089	NA	RN7SL460P	misc_RNA
ENSG00000267053	1.07667	2.59585	2.44583	1.06134	0.288537	NA	ENSG00000267053	lncRNA
ENSG00000275491.1	0.767115	2.59402	2.78734	0.930643	0.352038	NA	LINC01730	lncRNA
ENSG00000285401.1	0.362555	2.59384	3.5	0.741097	0.458634	NA	ENSG00000285401	processed_pseudogene
ENSG00000196184.10	1.29317	2.59287	1.80986	1.43263	0.151963	NA	OR10J1	protein_coding
ENSG00000259182.5	0.618011	2.59258	3.42417	0.75714	0.448966	NA	ENSG00000259182	lncRNA
ENSG00000124103.10	0.952222	2.59184	2.09434	1.23755	0.215884	NA	FAM209A	protein_coding
ENSG00000233554.6	2.82817	2.59047	1.63186	1.58743	0.112415	NA	B4GALT1-AS1	lncRNA
ENSG00000231948.2	0.845153	2.58802	1.80262	1.4357	0.151089	NA	HS1BP3-IT1	lncRNA
ENSG00000279013.1	0.404538	2.58685	4.11141	0.629188	0.529226	NA	ENSG00000279013	TEC
ENSG00000240729.1	0.633814	2.58679	3.05788	0.845942	0.397585	NA	ENSG00000240729	processed_pseudogene
ENSG00000198857.3	1.77069	2.58666	1.82707	1.41574	0.156851	NA	HSD3BP5	transcribed_unprocessed_pseudogene
ENSG00000229800.1	0.723623	2.58664	2.99115	0.864766	0.387167	NA	ATP8A2P2	processed_pseudogene
ENSG00000214629.3	0.624326	2.58657	2.60445	0.993137	0.320643	NA	RPSAP6	processed_pseudogene
ENSG00000280228.1	0.849212	2.58639	1.99405	1.29706	0.194612	NA	ENSG00000280228	TEC
ENSG00000288591.1	0.681322	2.58611	4.45958	0.579901	0.561982	NA	ENSG00000288591	protein_coding
ENSG00000270141.3	0.994546	2.58565	2.62561	0.984781	0.324732	NA	TERC	lncRNA
ENSG00000204422.7	0.323908	2.58473	5.93386	0.43559	0.663135	NA	ENSG00000204422	lncRNA
ENSG00000234181.1	0.243274	2.58233	5.93361	0.435204	0.663414	NA	PIGO-AS1	lncRNA
ENSG00000247809	15.7392	2.58194	0.727409	3.5495	0.000385965	0.00686099	NR2F2-AS1	lncRNA
ENSG00000240991.3	0.710125	2.58155	2.23181	1.15671	0.247393	NA	RPL23AP67	processed_pseudogene
ENSG00000275328.1	0.3953	2.57946	4.16919	0.618695	0.536117	NA	SPDYE19P	unprocessed_pseudogene
ENSG00000260493.1	2.61842	2.57915	1.57244	1.64022	0.10096	NA	E2F5-DT	lncRNA
ENSG00000226642.1	0.489977	2.57912	3.43599	0.750618	0.452882	NA	ACTG1P12	processed_pseudogene
ENSG00000279607.1	0.565266	2.57861	2.30307	1.11964	0.262867	NA	ENSG00000279607	lncRNA
ENSG00000247324.2	11.7801	2.57738	0.661842	3.89426	9.85002e-05	0.00222869	ENSG00000247324	lncRNA
ENSG00000173376.14	16.0299	2.57718	0.625105	4.12279	3.74305e-05	0.00100661	NDNF	protein_coding
ENSG00000229278	1.20368	2.57671	2.19372	1.17458	0.240161	NA	ENSG00000229278	lncRNA
ENSG00000258420.1	1.5773	2.57496	2.04597	1.25855	0.208192	NA	LONRF2P3	processed_pseudogene
ENSG00000242941.1	0.578948	2.57126	2.35534	1.09168	0.274975	NA	RPL12P7	processed_pseudogene
ENSG00000243137.8	1.08765	2.571	2.21813	1.15909	0.246421	NA	PSG4	protein_coding
ENSG00000227619.3	1.60629	2.56929	1.99181	1.28993	0.197075	NA	ENSG00000227619	lncRNA
ENSG00000216990.2	0.688236	2.56826	3.39194	0.757164	0.448952	NA	HSPD1P10	processed_pseudogene
ENSG00000204711.9	3.9206	2.5666	1.60426	1.59987	0.109628	NA	CFAP95	protein_coding
ENSG00000235760.4	0.951464	2.56485	2.39182	1.07234	0.283565	NA	MSH2-OT1	lncRNA
ENSG00000284803.1	0.471253	2.56465	3.51735	0.729142	0.465915	NA	ENSG00000284803	lncRNA
ENSG00000232411.1	0.395575	2.55929	4.16472	0.614516	0.538874	NA	ENSG00000232411	lncRNA
ENSG00000286795.1	0.274919	2.55453	5.93479	0.430433	0.666881	NA	ENSG00000286795	lncRNA
ENSG00000249828.2	1.09538	2.55363	2.29117	1.11455	0.265042	NA	ENSG00000249828	processed_pseudogene
ENSG00000182347.10	0.806223	2.55314	3.49856	0.729768	0.465532	NA	PDSS1P1	processed_pseudogene
ENSG00000249319.2	5.00675	2.55219	1.23729	2.06272	0.039139	NA	ENSG00000249319	protein_coding
ENSG00000256341.1	1.20215	2.55095	5.03936	0.506204	0.612713	NA	ENSG00000256341	lncRNA
ENSG00000126467.11	0.253965	2.54976	5.93085	0.429914	0.667258	NA	TSKS	protein_coding
ENSG00000243305.1	0.469967	2.54945	5.9349	0.429569	0.667509	NA	ENSG00000243305	lncRNA
ENSG00000230630.5	1.05728	2.54875	2.9962	0.850663	0.394957	NA	DNM3OS	lncRNA
ENSG00000212766.9	0.694443	2.54393	3.51883	0.722948	0.469712	NA	EWSAT1	lncRNA
ENSG00000205644.5	0.282803	2.54329	5.93503	0.428521	0.668272	NA	ENSG00000205644	processed_pseudogene
ENSG00000241185.2	0.198998	2.54157	5.93507	0.42823	0.668484	NA	ENSG00000241185	transcribed_processed_pseudogene
ENSG00000223345	0.713777	2.53675	2.73289	0.92823	0.353288	NA	H2BP1	transcribed_unprocessed_pseudogene
ENSG00000257622.1	0.77565	2.53645	5.93518	0.427358	0.669118	NA	ENSG00000257622	lncRNA
ENSG00000258038.6	1.4721	2.53298	1.92311	1.31712	0.187798	NA	LINC02327	lncRNA
ENSG00000229154.2	5.87297	2.5319	0.971426	2.60637	0.00915078	NA	KCNQ5-AS1	lncRNA
ENSG00000120068.7	22.4933	2.53166	1.2068	2.09783	0.0359201	0.18778	HOXB8	protein_coding
ENSG00000103184.12	4.46761	2.52484	1.40715	1.79429	0.0727672	NA	SEC14L5	protein_coding
ENSG00000155052.15	11.5535	2.52339	0.850928	2.96546	0.0030223	0.0336854	CNTNAP5	protein_coding
ENSG00000009709.12	159.019	2.52303	1.76	1.43354	0.151704	0.448606	PAX7	protein_coding
ENSG00000185736.16	78.3357	2.52242	1.45088	1.73854	0.0821155	0.315668	ADARB2	protein_coding
ENSG00000231431.7	0.857377	2.52127	2.14315	1.17643	0.239422	NA	FAR2P4	transcribed_unprocessed_pseudogene
ENSG00000249306	1.04938	2.51331	2.10596	1.19342	0.232704	NA	LINC01411	lncRNA
ENSG00000133742.14	1.06613	2.51267	2.97457	0.844714	0.39827	NA	CA1	protein_coding
ENSG00000112530	5.24582	2.51116	1.51182	1.66101	0.0967106	NA	PACRG	protein_coding
ENSG00000260412.1	16.8131	2.51029	0.718205	3.49523	0.000473657	0.00804746	ENSG00000260412	lncRNA
ENSG00000227676.4	1.28958	2.50746	1.69024	1.4835	0.137942	NA	LINC01068	lncRNA
ENSG00000005981.13	0.768991	2.50603	3.10841	0.806211	0.420121	NA	ASB4	protein_coding
ENSG00000267631.5	1.19946	2.5059	2.18867	1.14494	0.252234	NA	CGB1	protein_coding
ENSG00000179954.16	13.9055	2.50348	0.901616	2.77665	0.00549215	0.0526424	SSC5D	protein_coding
ENSG00000169302.16	10.6553	2.49596	1.37036	1.82139	0.068548	0.282862	STK32A	protein_coding
ENSG00000240031.1	1.18488	2.49487	1.90153	1.31203	0.18951	NA	OR9A3P	transcribed_unprocessed_pseudogene
ENSG00000275026.1	3.07117	2.49437	1.72751	1.44391	0.148764	NA	GXYLT1P4	transcribed_processed_pseudogene
ENSG00000159860.7	1.59899	2.48846	2.51456	0.989623	0.322359	NA	TCAF2P1	transcribed_unprocessed_pseudogene
ENSG00000205054	2.69586	2.48643	2.64388	0.940447	0.346989	NA	LINC01121	lncRNA
ENSG00000140932.10	0.689179	2.48544	2.12739	1.16831	0.242682	NA	CMTM2	protein_coding
ENSG00000203804.5	1.82989	2.48494	2.06538	1.20314	0.228922	NA	ADAMTSL4-AS1	lncRNA
ENSG00000267143.1	0.519389	2.47662	5.91403	0.418771	0.675384	NA	ENSG00000267143	lncRNA
ENSG00000130518	8.59687	2.47214	1.11947	2.20831	0.0272229	0.157145	IQCN	protein_coding
ENSG00000115474.7	6.31909	2.47021	1.09785	2.25005	0.0244459	0.146419	KCNJ13	protein_coding
ENSG00000197921.6	9.56965	2.46967	1.58742	1.55578	0.119761	0.393938	HES5	protein_coding
ENSG00000130173.13	0.557356	2.46544	4.06884	0.605931	0.54456	NA	ANGPTL8	protein_coding
ENSG00000259954.1	2.69145	2.46026	1.72581	1.42557	0.153992	NA	IL21R-AS1	lncRNA
ENSG00000286658.1	0.693297	2.45962	2.21783	1.10902	0.267422	NA	ENSG00000286658	lncRNA
ENSG00000183298.5	1.82932	2.45907	1.68938	1.4556	0.145502	NA	RPSAP19	processed_pseudogene
ENSG00000155754.15	1.72517	2.4578	1.53783	1.59823	0.109992	NA	C2CD6	protein_coding
ENSG00000270857.1	0.632982	2.45689	3.29372	0.745932	0.455708	NA	ENSG00000270857	processed_pseudogene
ENSG00000214797.3	1.80605	2.45638	1.76436	1.39222	0.163856	NA	ENSG00000214797	lncRNA
ENSG00000187116.14	0.350881	2.45471	5.05494	0.485605	0.627247	NA	LILRA5	protein_coding
ENSG00000213493.3	2.02346	2.45363	1.49263	1.64383	0.100212	NA	ACTN4P1	processed_pseudogene
ENSG00000202379.1	0.437317	2.45165	4.94422	0.495862	0.619992	NA	SNORA70	snoRNA
ENSG00000287401.1	0.655386	2.45059	3.24922	0.754209	0.450724	NA	ENSG00000287401	lncRNA
ENSG00000205669.4	0.278935	2.44927	5.93545	0.412651	0.679862	NA	ACOT6	protein_coding
ENSG00000273233.1	1.78315	2.44911	1.76704	1.38599	0.165749	NA	ENSG00000273233	lncRNA
ENSG00000263432.2	3.74127	2.4485	1.55875	1.57081	0.116228	NA	RN7SL689P	misc_RNA
ENSG00000279853.1	2.25242	2.4478	1.58525	1.54412	0.12256	NA	ENSG00000279853	TEC
ENSG00000241680.1	0.454308	2.44771	5.84301	0.418913	0.67528	NA	RPL31P49	processed_pseudogene
ENSG00000261728.1	5.18615	2.44758	1.25372	1.95225	0.0509083	NA	ENSG00000261728	lncRNA
ENSG00000108684.15	1.61217	2.44745	2.4046	1.01782	0.308763	NA	ASIC2	protein_coding
ENSG00000269125.1	2.25279	2.44718	1.59363	1.5356	0.124637	NA	ENSG00000269125	lncRNA
ENSG00000224577	5.79024	2.44654	1.448	1.6896	0.0911038	NA	LINC01117	lncRNA
ENSG00000267397.1	1.62382	2.44454	1.60493	1.52315	0.127722	NA	ENSG00000267397	lncRNA
ENSG00000224121.1	0.55889	2.44378	3.95997	0.617122	0.537155	NA	ATG12P2	processed_pseudogene
ENSG00000235066.7	0.744009	2.44273	2.24694	1.08714	0.276976	NA	ENSG00000235066	lncRNA
ENSG00000142178.9	3.01575	2.44258	2.41299	1.01226	0.311413	NA	SIK1	protein_coding
ENSG00000274594.1	1.58272	2.44107	1.73568	1.4064	0.159604	NA	ENSG00000274594	processed_pseudogene
ENSG00000257023.1	1.32793	2.44104	2.03257	1.20096	0.229765	NA	ETNK1-DT	lncRNA
ENSG00000172717	2.24733	2.43978	1.60545	1.51969	0.128589	NA	GARIN2	protein_coding
ENSG00000233509.2	2.69349	2.43689	1.49921	1.62545	0.104066	NA	ZNF197-AS1	lncRNA
ENSG00000251301	0.595244	2.42803	3.11437	0.779622	0.435614	NA	LINC02384	lncRNA
ENSG00000242748.1	1.81218	2.42652	1.53702	1.57871	0.114402	NA	RPL23AP81	transcribed_processed_pseudogene
ENSG00000262172.1	1.83145	2.42085	1.69227	1.43054	0.152563	NA	ENSG00000262172	lncRNA
ENSG00000287283.1	2.37536	2.42065	1.88747	1.28248	0.199674	NA	ENSG00000287283	lncRNA
ENSG00000279286.2	9.21102	2.41948	0.950212	2.54625	0.0108886	0.0854078	ENSG00000279286	TEC
ENSG00000258658.1	0.969147	2.41736	1.88471	1.28262	0.199627	NA	TOMM20L-DT	lncRNA
ENSG00000112539.15	11.4752	2.41243	0.928251	2.5989	0.00935236	0.0767808	C6orf118	protein_coding
ENSG00000273059.1	0.646412	2.40954	3.54246	0.680189	0.496385	NA	ENSG00000273059	lncRNA
ENSG00000287038	32.8347	2.40363	0.407996	5.8913	3.83161e-09	3.4512e-07	ENSG00000287038	lncRNA
ENSG00000264028.2	1.11001	2.40297	2.16644	1.10918	0.267352	NA	RN7SL744P	misc_RNA
ENSG00000124839.13	0.78747	2.39743	4.51733	0.530718	0.595614	NA	RAB17	protein_coding
ENSG00000172247.4	0.29283	2.38694	5.95649	0.400729	0.688619	NA	C1QTNF4	protein_coding
ENSG00000213231.13	1.3633	2.38046	2.60194	0.914878	0.360256	NA	TCL1B	protein_coding
ENSG00000100453	0.167966	2.37992	5.95117	0.399909	0.689224	NA	GZMB	protein_coding
ENSG00000101115.13	10.9873	2.37244	1.05902	2.24021	0.0250771	0.149061	SALL4	protein_coding
ENSG00000266642.2	3.03421	2.36878	1.46174	1.62052	0.10512	NA	ENSG00000266642	lncRNA
ENSG00000158104.11	7.00002	2.36042	0.94671	2.49328	0.0126568	0.0942873	HPD	protein_coding
ENSG00000068781.21	9.41779	2.35782	1.42384	1.65595	0.0977314	0.350304	STON1-GTF2A1L	protein_coding
ENSG00000125046	5.53638	2.35743	1.01278	2.32769	0.0199287	NA	SSUH2	protein_coding
ENSG00000163046.16	1.84649	2.35302	1.68342	1.39776	0.162184	NA	ANKRD30BL	protein_coding
ENSG00000183674.12	2.05154	2.34944	1.83567	1.27988	0.200586	NA	LINC00518	lncRNA
ENSG00000206113.11	5.50322	2.34828	1.28677	1.82493	0.0680109	NA	CFAP99	protein_coding
ENSG00000029534.21	49.9078	2.34671	0.775693	3.02531	0.00248377	0.0288611	ANK1	protein_coding
ENSG00000159289.6	4.82309	2.34451	1.92136	1.22023	0.222376	NA	GOLGA6A	protein_coding
ENSG00000242337	2.11443	2.33894	1.90809	1.2258	0.220274	NA	INHCAP	transcribed_unprocessed_pseudogene
ENSG00000231233	2.49846	2.33711	1.30793	1.78687	0.073958	NA	CFAP58-DT	lncRNA
ENSG00000243849.2	1.24315	2.33475	2.09512	1.11438	0.265118	NA	CFAP44-AS1	lncRNA
ENSG00000139890.10	1.12651	2.33163	2.05662	1.13372	0.256912	NA	REM2	protein_coding
ENSG00000117154.12	0.283593	2.33102	5.95372	0.391524	0.69541	NA	IGSF21	protein_coding
ENSG00000125255.7	9.33194	2.33072	1.24478	1.87239	0.0611523	0.264764	SLC10A2	protein_coding
ENSG00000250295.6	7.11411	2.32881	1.08674	2.14292	0.0321191	0.174048	RDH10-AS1	lncRNA
ENSG00000138738.11	2.41902	2.32731	1.4713	1.58181	0.113694	NA	PRDM5	protein_coding
ENSG00000165807.8	0.913492	2.32547	2.01275	1.15537	0.24794	NA	PPP1R36	protein_coding
ENSG00000206634.1	0.834883	2.32513	2.91879	0.796606	0.42568	NA	SNORA22	snoRNA
ENSG00000231050	2.34579	2.3177	1.36892	1.69308	0.0904406	NA	GNB1-DT	lncRNA
ENSG00000250654.7	0.802465	2.31229	2.69429	0.858218	0.390772	NA	ENSG00000250654	transcribed_unprocessed_pseudogene
ENSG00000269242.1	2.26414	2.30954	2.47721	0.932312	0.351175	NA	ENSG00000269242	protein_coding
ENSG00000167261.14	2.11218	2.30938	2.2849	1.01071	0.312154	NA	DPEP2	protein_coding
ENSG00000285935.1	4.07409	2.30746	2.49627	0.924365	0.355296	NA	ENSG00000285935	lncRNA
ENSG00000244578.1	3.11923	2.30417	1.68904	1.36419	0.172508	NA	LINC01391	lncRNA
ENSG00000260369.2	2.59771	2.3006	1.33014	1.72959	0.0837031	NA	ENSG00000260369	lncRNA
ENSG00000154330.13	256.507	2.28663	0.302618	7.55615	4.15172e-14	1.07063e-11	PGM5	protein_coding
ENSG00000164287.13	3.23116	2.2865	1.2675	1.80394	0.0712405	NA	CDC20B	protein_coding
ENSG00000206603.1	0.904707	2.28333	1.91235	1.19399	0.232482	NA	SNORA22B	snoRNA
ENSG00000230438	2.05368	2.27924	1.82397	1.2496	0.211444	NA	SERPINB9P1	lncRNA
ENSG00000255277.3	0.454059	2.27735	3.54985	0.641534	0.521176	NA	ABCC6P2	transcribed_unprocessed_pseudogene
ENSG00000074410.14	29.5261	2.2706	1.02616	2.21271	0.0269177	0.156116	CA12	protein_coding
ENSG00000258028.3	0.192816	2.26476	5.9473	0.380804	0.703348	NA	ENSG00000258028	lncRNA
ENSG00000130477.16	139.624	2.26473	0.562558	4.02576	5.67907e-05	0.00141413	UNC13A	protein_coding
ENSG00000006210.7	10.8512	2.26172	1.19117	1.89874	0.057598	0.254646	CX3CL1	protein_coding
ENSG00000172139.15	0.725273	2.2539	2.21915	1.01566	0.309791	NA	SLC9C1	protein_coding
ENSG00000274290.3	8.81777	2.2511	0.872135	2.58113	0.00984766	0.0796315	H2BC6	protein_coding
ENSG00000230201.5	0.839986	2.24992	2.16873	1.03743	0.299533	NA	ATP6V0CP1	processed_pseudogene
ENSG00000144550	1.29041	2.2475	1.95775	1.148	0.250968	NA	CPNE9	protein_coding
ENSG00000233030.2	5.3412	2.24595	1.29699	1.73166	0.0833341	NA	ENSG00000233030	lncRNA
ENSG00000178358.5	0.534443	2.24576	3.38414	0.663614	0.506938	NA	OR2D3	protein_coding
ENSG00000113389.16	369.945	2.24466	0.508579	4.4136	1.01667e-05	0.000331696	NPR3	protein_coding
ENSG00000164440.15	1.34934	2.24466	1.75803	1.2768	0.201672	NA	TXLNB	protein_coding
ENSG00000279694.1	5.73217	2.24429	1.02114	2.19783	0.0279612	NA	ENSG00000279694	TEC
ENSG00000283138.1	2.03757	2.24385	1.64804	1.36153	0.173346	NA	ENSG00000283138	lncRNA
ENSG00000105650	14.1441	2.24366	1.2787	1.75464	0.0793215	0.309862	PDE4C	protein_coding
ENSG00000269933.1	4.46744	2.24299	1.61679	1.38731	0.165348	NA	ENSG00000269933	lncRNA
ENSG00000278909.1	0.972223	2.24288	1.95387	1.14792	0.251003	NA	ENSG00000278909	TEC
ENSG00000078053.17	221.201	2.24283	0.408805	5.48631	4.10409e-08	2.75927e-06	AMPH	protein_coding
ENSG00000144035.4	1.94945	2.24226	2.2264	1.00712	0.313875	NA	NAT8	protein_coding
ENSG00000273734.1	0.42575	2.23979	5.94601	0.376688	0.706406	NA	ENSG00000273734	protein_coding
ENSG00000233266.1	1.85878	2.23971	1.68352	1.33038	0.183394	NA	HMGB1P31	processed_pseudogene
ENSG00000280778.1	2.07158	2.23949	1.94455	1.15168	0.249453	NA	ENSG00000280778	protein_coding
ENSG00000260093.1	2.57721	2.23906	1.52164	1.47148	0.141161	NA	MSRA-DT	lncRNA
ENSG00000261641.2	0.312917	2.23664	5.94609	0.376153	0.706803	NA	ENSG00000261641	lncRNA
ENSG00000182463.16	52.3899	2.23422	1.86735	1.19647	0.231515	0.556977	TSHZ2	protein_coding
ENSG00000225213.2	1.66319	2.23323	1.80836	1.23494	0.216852	NA	ENSG00000225213	lncRNA
ENSG00000237989	0.244688	2.23256	5.94619	0.375461	0.707318	NA	LINC01679	lncRNA
ENSG00000188512.6	0.198729	2.23249	5.94619	0.375449	0.707326	NA	ENSG00000188512	processed_pseudogene
ENSG00000186910.4	0.453898	2.23204	5.9462	0.375373	0.707383	NA	SERPINA11	protein_coding
ENSG00000248564.1	0.899594	2.2312	1.8068	1.23489	0.21687	NA	ENSG00000248564	processed_pseudogene
ENSG00000232582.1	0.162569	2.23033	5.94625	0.375081	0.7076	NA	ENSG00000232582	processed_pseudogene
ENSG00000185792.10	0.125715	2.22914	5.94628	0.374879	0.70775	NA	NLRP9	protein_coding
ENSG00000206026.7	0.125715	2.22914	5.94628	0.374879	0.70775	NA	SMIM21	protein_coding
ENSG00000234881.1	0.125715	2.22914	5.94628	0.374879	0.70775	NA	PIGFP2	processed_pseudogene
ENSG00000244657.1	0.125715	2.22914	5.94628	0.374879	0.70775	NA	ENSG00000244657	transcribed_unprocessed_pseudogene
ENSG00000272694.1	0.125715	2.22914	5.94628	0.374879	0.70775	NA	ENSG00000272694	lncRNA
ENSG00000007216	0.125715	2.22914	5.94628	0.374879	0.70775	NA	SLC13A2	protein_coding
ENSG00000197915.7	0.167623	2.22909	5.94628	0.374871	0.707756	NA	HRNR	protein_coding
ENSG00000179615.3	0.446274	2.22818	4.19787	0.530789	0.595565	NA	OR2AP1	protein_coding
ENSG00000226626.2	0.447907	2.22809	4.98286	0.447151	0.654766	NA	NOP56P2	processed_pseudogene
ENSG00000271370.1	0.294708	2.22779	5.94631	0.374651	0.70792	NA	ENSG00000271370	processed_pseudogene
ENSG00000258718.3	1.34392	2.22601	1.6124	1.38056	0.167414	NA	LINC02311	lncRNA
ENSG00000262097	0.932263	2.22543	2.094	1.06276	0.287891	NA	LINC02185	lncRNA
ENSG00000235574.1	0.214383	2.22473	5.94639	0.374131	0.708307	NA	ENSG00000235574	processed_pseudogene
ENSG00000257220.1	0.291733	2.22413	5.94641	0.374029	0.708383	NA	PRXL2AP1	processed_pseudogene
ENSG00000279819.1	0.165999	2.2238	5.94683	0.373948	0.708443	NA	ENSG00000279819	TEC
ENSG00000284516.1	0.167315	2.22337	5.94643	0.3739	0.708479	NA	VAMP9P	transcribed_unitary_pseudogene
ENSG00000230286.1	0.734439	2.22323	2.15097	1.03359	0.301327	NA	ENSG00000230286	lncRNA
ENSG00000260362.1	0.257524	2.22312	5.94643	0.373858	0.70851	NA	ENSG00000260362	lncRNA
ENSG00000222012.1	9.75284	2.22268	1.47998	1.50183	0.13314	0.418878	ENSG00000222012	lncRNA
ENSG00000256037.1	0.746097	2.22231	2.04981	1.08416	0.278295	NA	MRPL40P1	processed_pseudogene
ENSG00000259784.1	1.40183	2.22211	1.65482	1.34281	0.179332	NA	ENSG00000259784	protein_coding
ENSG00000144063.4	1.97626	2.22211	1.49284	1.48851	0.136617	NA	MALL	protein_coding
ENSG00000239542.3	1.0117	2.22135	2.42468	0.916138	0.359595	NA	RN7SL399P	misc_RNA
ENSG00000280168.1	2.12432	2.22127	1.57108	1.41385	0.157406	NA	ENSG00000280168	TEC
ENSG00000257150	0.973275	2.22117	3.31322	0.670397	0.502605	NA	PGAM1P5	transcribed_processed_pseudogene
ENSG00000082556.14	1.19986	2.22109	1.65019	1.34596	0.178316	NA	OPRK1	protein_coding
ENSG00000118160.14	46.0818	2.22042	0.963951	2.30346	0.0212531	0.133274	SLC8A2	protein_coding
ENSG00000225449.3	8.66992	2.21986	1.42855	1.55393	0.120202	0.394973	RAB6C-AS1	transcribed_unprocessed_pseudogene
ENSG00000241357.1	0.85133	2.21966	2.63723	0.841663	0.399976	NA	ENSG00000241357	lncRNA
ENSG00000286777.1	0.327915	2.21838	5.94655	0.373053	0.709109	NA	ENSG00000286777	lncRNA
ENSG00000283578.1	0.714842	2.21758	3.42236	0.647969	0.517005	NA	MTND5P42	processed_pseudogene
ENSG00000262147.1	2.02827	2.21756	1.75629	1.26264	0.206718	NA	ENSG00000262147	lncRNA
ENSG00000287493.1	2.14823	2.21697	1.50541	1.47267	0.14084	NA	ENSG00000287493	lncRNA
ENSG00000269463.1	0.608831	2.21523	2.54802	0.869392	0.384633	NA	ENSG00000269463	lncRNA
ENSG00000246375	1.12956	2.21435	1.88182	1.17671	0.239312	NA	PPM1K-DT	lncRNA
ENSG00000246016.2	1.361	2.21396	1.77682	1.24602	0.212756	NA	LINC01513	lncRNA
ENSG00000260578.1	3.70861	2.21355	1.26803	1.74566	0.0808709	NA	ENSG00000260578	lncRNA
ENSG00000227197.1	0.240446	2.21327	5.94711	0.372159	0.709775	NA	ENSG00000227197	lncRNA
ENSG00000259648.1	1.45609	2.21314	1.84986	1.19638	0.231548	NA	ENSG00000259648	transcribed_processed_pseudogene
ENSG00000260660.4	1.01418	2.21292	2.33776	0.946601	0.343842	NA	ENSG00000260660	transcribed_unitary_pseudogene
ENSG00000234031.1	0.659654	2.21275	2.44534	0.904884	0.365527	NA	RPS3AP44	processed_pseudogene
ENSG00000226429.2	0.356097	2.21271	5.06558	0.436813	0.662247	NA	ENSG00000226429	unprocessed_pseudogene
ENSG00000226268.3	0.234991	2.21195	5.94714	0.371935	0.709942	NA	ENSG00000226268	processed_pseudogene
ENSG00000250838.1	1.20799	2.21182	1.77836	1.24374	0.213595	NA	ENSG00000250838	lncRNA
ENSG00000268279.4	1.10926	2.21151	2.16724	1.02042	0.307528	NA	ENSG00000268279	protein_coding
ENSG00000279182.1	1.68511	2.21147	2.1936	1.00815	0.313384	NA	ENSG00000279182	lncRNA
ENSG00000017427.17	1.7838	2.21075	2.58567	0.855002	0.39255	NA	IGF1	protein_coding
ENSG00000270469.1	2.01463	2.21034	1.61453	1.36903	0.170988	NA	ENSG00000270469	processed_pseudogene
ENSG00000174417.3	1.0583	2.21008	2.2134	0.998501	0.318036	NA	TRHR	protein_coding
ENSG00000269400.1	0.594869	2.20972	2.71281	0.81455	0.41533	NA	ENSG00000269400	lncRNA
ENSG00000228799.6	0.487054	2.20928	4.06529	0.543449	0.58682	NA	LINC01939	lncRNA
ENSG00000234175.1	0.930855	2.20869	2.34069	0.943604	0.345372	NA	ENSG00000234175	processed_pseudogene
ENSG00000271025.1	0.480022	2.20819	4.82504	0.457652	0.647202	NA	ENSG00000271025	processed_pseudogene
ENSG00000280022.1	0.988172	2.20757	1.95518	1.12909	0.258861	NA	ENSG00000280022	TEC
ENSG00000227394.1	1.1976	2.20738	2.06981	1.06647	0.286213	NA	RPL11P1	processed_pseudogene
ENSG00000237133	1.10901	2.20721	1.99527	1.10622	0.268631	NA	NA	NA
ENSG00000225272.2	0.204666	2.20718	5.94716	0.371132	0.710539	NA	ENSG00000225272	processed_pseudogene
ENSG00000216901.1	2.71197	2.20716	1.49969	1.47175	0.141089	NA	ZNF603P	unprocessed_pseudogene
ENSG00000285710.1	2.61086	2.20699	1.49482	1.47642	0.13983	NA	ENSG00000285710	lncRNA
ENSG00000269980.1	1.73378	2.2063	1.59764	1.38098	0.167286	NA	ENSG00000269980	lncRNA
ENSG00000257042.1	2.32072	2.20505	1.35872	1.62289	0.104614	NA	ENSG00000257042	lncRNA
ENSG00000205106	0.380825	2.20503	5.06836	0.435058	0.663521	NA	LINC02716	lncRNA
ENSG00000261456.6	6.31357	2.20467	1.01158	2.17944	0.0292994	0.164694	TUBB8	protein_coding
ENSG00000277297.1	0.249949	2.20454	5.94735	0.370677	0.710878	NA	ATP5F1AP10	processed_pseudogene
ENSG00000288266.1	0.315813	2.20421	5.18297	0.425279	0.670633	NA	ENSG00000288266	TEC
ENSG00000267062.1	0.748586	2.2042	2.7984	0.787667	0.430891	NA	ENSG00000267062	lncRNA
ENSG00000265411.1	1.23331	2.20365	1.82018	1.21067	0.226021	NA	RN7SL656P	misc_RNA
ENSG00000240750.3	1.85922	2.20313	1.66008	1.32712	0.184468	NA	RN7SL559P	misc_RNA
ENSG00000287040.1	2.08816	2.20258	1.40494	1.56774	0.116942	NA	ENSG00000287040	lncRNA
ENSG00000279598.1	0.236795	2.20251	5.94739	0.370332	0.711135	NA	ENSG00000279598	TEC
ENSG00000235123.5	0.57052	2.20224	2.4841	0.886536	0.375329	NA	DSCAM-AS1	lncRNA
ENSG00000279619.1	2.34882	2.20198	1.7107	1.28718	0.198032	NA	ENSG00000279619	TEC
ENSG00000285303.1	0.195255	2.20158	5.94738	0.370177	0.711251	NA	ENSG00000285303	transcribed_unprocessed_pseudogene
ENSG00000204832.10	1.7103	2.20145	1.63695	1.34485	0.178674	NA	ST8SIA6-AS1	lncRNA
ENSG00000227200.1	0.967314	2.20078	1.92648	1.14239	0.253294	NA	ENSG00000227200	lncRNA
ENSG00000228413.1	0.622815	2.20076	2.48192	0.886719	0.37523	NA	ENSG00000228413	processed_pseudogene
ENSG00000269547.1	0.288406	2.20076	5.94743	0.370035	0.711357	NA	ENSG00000269547	protein_coding
ENSG00000226457.1	0.207228	2.20074	5.94735	0.370036	0.711356	NA	RPL22P3	processed_pseudogene
ENSG00000266579.1	0.247616	2.20073	5.94744	0.37003	0.71136	NA	ENSG00000266579	lncRNA
ENSG00000280431.1	0.605299	2.20053	3.09479	0.711042	0.477058	NA	ENSG00000280431	TEC
ENSG00000227407.1	1.75599	2.20036	1.61202	1.36498	0.172261	NA	ENSG00000227407	lncRNA
ENSG00000250492.1	2.90666	2.20036	1.85036	1.18915	0.23438	NA	INTS6P1	processed_pseudogene
ENSG00000254991.1	0.735174	2.20023	2.55602	0.860802	0.389347	NA	ENSG00000254991	lncRNA
ENSG00000100024.15	4.87738	2.19998	1.25476	1.75331	0.079549	NA	UPB1	protein_coding
ENSG00000175707	0.357724	2.19992	5.10718	0.43075	0.66665	NA	KDF1	protein_coding
ENSG00000249106.1	0.56148	2.19981	3.42098	0.643037	0.5202	NA	GPM6A-DT	lncRNA
ENSG00000244021.4	0.209502	2.19928	5.94736	0.369791	0.711538	NA	ENSG00000244021	processed_pseudogene
ENSG00000175741.5	0.122991	2.19878	5.94749	0.3697	0.711606	NA	RWDD4P2	processed_pseudogene
ENSG00000225907.1	0.122991	2.19878	5.94749	0.3697	0.711606	NA	RPS27P16	processed_pseudogene
ENSG00000236504.2	0.122991	2.19878	5.94749	0.3697	0.711606	NA	ENSG00000236504	unprocessed_pseudogene
ENSG00000237517.10	0.122991	2.19878	5.94749	0.3697	0.711606	NA	CELSR1P1	transcribed_unprocessed_pseudogene
ENSG00000243410.1	0.122991	2.19878	5.94749	0.3697	0.711606	NA	PSMD6-AS1	lncRNA
ENSG00000226790.3	0.524809	2.19878	2.65656	0.82768	0.407852	NA	HNRNPA3P1	processed_pseudogene
ENSG00000248596.8	0.878259	2.19821	3.29136	0.667871	0.504216	NA	ENSG00000248596	lncRNA
ENSG00000247925.2	0.466438	2.19815	3.53653	0.621556	0.534234	NA	ENSG00000247925	lncRNA
ENSG00000256913.1	0.20169	2.19795	5.94751	0.369558	0.711712	NA	ENSG00000256913	processed_pseudogene
ENSG00000160951.4	2.70718	2.1961	1.38924	1.5808	0.113924	NA	PTGER1	protein_coding
ENSG00000163377.16	6.97332	2.19606	2.03044	1.08157	0.279445	0.612484	TAFA4	protein_coding
ENSG00000232623.1	0.894058	2.19594	1.87831	1.1691	0.242362	NA	MRAP-AS1	lncRNA
ENSG00000237501.1	0.41342	2.19565	3.55682	0.617308	0.537032	NA	ENSG00000237501	processed_pseudogene
ENSG00000260166	0.4618	2.19537	4.01804	0.546378	0.584806	NA	ENSG00000260166	lncRNA
ENSG00000288025.1	1.19883	2.19524	1.88748	1.16306	0.244807	NA	ENSG00000288025	lncRNA
ENSG00000229503.1	0.610564	2.19499	2.81673	0.779269	0.435821	NA	RPL21P37	processed_pseudogene
ENSG00000288562.1	0.42378	2.19489	5.94759	0.369039	0.712098	NA	ENSG00000288562	lncRNA
ENSG00000165409.18	15.0325	2.19461	0.89037	2.46484	0.0137076	0.0991525	TSHR	protein_coding
ENSG00000271787.1	0.325449	2.19427	5.9476	0.368934	0.712177	NA	ENSG00000271787	lncRNA
ENSG00000258565.1	0.53105	2.19413	2.79988	0.783652	0.433245	NA	BLZF2P	unprocessed_pseudogene
ENSG00000232600.3	1.12959	2.1939	2.2851	0.960092	0.337009	NA	TONSL-AS1	lncRNA
ENSG00000248416.1	0.523455	2.19376	3.37955	0.649127	0.516256	NA	ENSG00000248416	lncRNA
ENSG00000237273.1	0.24684	2.19376	5.94743	0.368858	0.712234	NA	RSL24D1P8	processed_pseudogene
ENSG00000244134.1	0.53763	2.19368	3.12112	0.70285	0.48215	NA	RPS12P20	processed_pseudogene
ENSG00000243519.1	0.779325	2.19348	2.17516	1.00842	0.313251	NA	IGLVIVOR22-2	IG_V_pseudogene
ENSG00000144010	0.301556	2.19338	5.94763	0.368782	0.712291	NA	TRIM43B	protein_coding
ENSG00000277423.1	1.37036	2.19269	2.16926	1.0108	0.312112	NA	ENSG00000277423	lncRNA
ENSG00000287610.1	0.406222	2.19242	3.56013	0.615827	0.538009	NA	ENSG00000287610	lncRNA
ENSG00000233994.2	0.451671	2.19236	4.15877	0.527165	0.598079	NA	GDI2P2	processed_pseudogene
ENSG00000226758.1	1.45422	2.19165	1.96639	1.11456	0.26504	NA	DISC1-IT1	lncRNA
ENSG00000241400.1	0.662429	2.19148	2.57221	0.851984	0.394223	NA	ENSG00000241400	processed_pseudogene
ENSG00000229591.1	1.18207	2.19146	2.67046	0.82063	0.411857	NA	ENSG00000229591	lncRNA
ENSG00000232204.1	0.792515	2.1911	2.42558	0.903328	0.366352	NA	TET1P1	processed_pseudogene
ENSG00000224826.1	0.709268	2.19099	2.3363	0.937805	0.348345	NA	USP21P1	processed_pseudogene
ENSG00000217512.1	0.36394	2.19096	5.94769	0.368371	0.712596	NA	ENSG00000217512	processed_pseudogene
ENSG00000277893.2	0.443446	2.19043	3.58643	0.610757	0.541361	NA	SRD5A2	protein_coding
ENSG00000271040.1	1.18019	2.19022	1.80342	1.21448	0.224563	NA	TMEM242-DT	lncRNA
ENSG00000213050.5	0.160789	2.18978	5.9481	0.368148	0.712763	NA	TPM3P1	processed_pseudogene
ENSG00000260256.1	0.373033	2.18971	3.59349	0.609355	0.542289	NA	ENSG00000260256	lncRNA
ENSG00000259615.1	0.578726	2.18946	3.00398	0.728851	0.466093	NA	ENSG00000259615	lncRNA
ENSG00000286165.1	1.81077	2.1892	1.95323	1.12081	0.262369	NA	ENSG00000286165	protein_coding
ENSG00000279807.1	1.48104	2.18889	1.67396	1.30761	0.191005	NA	ENSG00000279807	TEC
ENSG00000271904.1	0.318499	2.18884	4.31668	0.507066	0.612108	NA	ENSG00000271904	lncRNA
ENSG00000264735.1	0.360417	2.18875	5.94775	0.367997	0.712876	NA	ENSG00000264735	lncRNA
ENSG00000280561.1	0.212379	2.18843	5.94776	0.367941	0.712917	NA	ENSG00000280561	lncRNA
ENSG00000232290.1	0.245494	2.18807	5.94783	0.367877	0.712965	NA	ENSG00000232290	lncRNA
ENSG00000280166.1	0.202973	2.18799	5.94783	0.367863	0.712976	NA	ENSG00000280166	TEC
ENSG00000278794.1	0.528239	2.18786	3.06534	0.713742	0.475387	NA	Metazoa_SRP	misc_RNA
ENSG00000265666.1	0.856056	2.18775	2.51636	0.86941	0.384623	NA	RARA-AS1	lncRNA
ENSG00000237260.1	0.758504	2.18678	3.02828	0.722122	0.47022	NA	PPIAP67	processed_pseudogene
ENSG00000237007.4	0.872772	2.18664	2.58652	0.845398	0.397889	NA	KRT18P52	processed_pseudogene
ENSG00000278703.1	1.92432	2.18612	1.54425	1.41565	0.156878	NA	ENSG00000278703	lncRNA
ENSG00000259254.1	0.802919	2.186	2.10047	1.04072	0.298004	NA	ENSG00000259254	lncRNA
ENSG00000275091.1	0.785499	2.18516	2.38918	0.914606	0.360399	NA	ENSG00000275091	lncRNA
ENSG00000229896.2	0.477028	2.18398	2.47685	0.881755	0.377909	NA	ENSG00000229896	lncRNA
ENSG00000231192.3	1.01123	2.18397	1.95656	1.11623	0.264323	NA	OR5H1	protein_coding
ENSG00000166415.15	6.55171	2.18388	0.864846	2.52517	0.0115643	0.0888202	WDR72	protein_coding
ENSG00000188396.4	1.01129	2.18365	1.90994	1.14331	0.25291	NA	DYNLT4	protein_coding
ENSG00000276620.1	0.399743	2.18361	4.94674	0.441424	0.658906	NA	ENSG00000276620	processed_pseudogene
ENSG00000267535.2	0.813018	2.18277	2.74311	0.795729	0.42619	NA	LINC00868	lncRNA
ENSG00000169064.13	4.58482	2.18261	1.61224	1.35378	0.175807	NA	ZBBX	protein_coding
ENSG00000100652.5	2.10648	2.18237	1.65416	1.31932	0.187061	NA	SLC10A1	protein_coding
ENSG00000283156.1	3.75926	2.1819	1.53983	1.41698	0.15649	NA	ENSG00000283156	transcribed_unprocessed_pseudogene
ENSG00000132698.15	1.18187	2.18182	1.93443	1.12789	0.259367	NA	RAB25	protein_coding
ENSG00000227744.4	0.20189	2.18171	5.94822	0.366784	0.71378	NA	LINC01940	lncRNA
ENSG00000248956.1	0.440301	2.18161	4.04918	0.538777	0.590041	NA	HMGB1P44	processed_pseudogene
ENSG00000236677.1	0.544141	2.18146	2.54242	0.858022	0.39088	NA	SETD4-AS1	lncRNA
ENSG00000284837.1	1.23756	2.18019	1.75809	1.24009	0.214941	NA	ENSG00000284837	lncRNA
ENSG00000187952.9	1.17175	2.17928	2.3008	0.947181	0.343547	NA	HS6ST1P1	processed_pseudogene
ENSG00000228928.1	0.647885	2.17879	2.53217	0.860444	0.389544	NA	KPNA2P2	processed_pseudogene
ENSG00000225636.1	0.278999	2.1779	5.32418	0.409059	0.682496	NA	HNRNPA3P15	processed_pseudogene
ENSG00000224727.1	0.581615	2.17741	4.01615	0.542163	0.587706	NA	FCF1P7	processed_pseudogene
ENSG00000234806.1	0.485325	2.1769	3.04132	0.715773	0.474132	NA	RPL26P29	processed_pseudogene
ENSG00000234026.1	0.161729	2.17683	5.94828	0.365959	0.714396	NA	ENSG00000234026	lncRNA
ENSG00000286694.1	0.790311	2.17636	2.50168	0.869957	0.384324	NA	ENSG00000286694	lncRNA
ENSG00000205922.5	14.5075	2.17633	1.60484	1.3561	0.175066	0.482575	ONECUT3	protein_coding
ENSG00000226828.2	1.01461	2.17625	2.17671	0.999789	0.317413	NA	LINC02774	lncRNA
ENSG00000284607.1	0.802819	2.17558	2.29515	0.947903	0.343179	NA	ENSG00000284607	lncRNA
ENSG00000122432	5.85236	2.17519	0.895645	2.42863	0.0151559	NA	SPATA1	protein_coding
ENSG00000239774.1	0.971187	2.17483	1.79558	1.21122	0.225813	NA	TTC14-DT	lncRNA
ENSG00000275409.1	0.576458	2.17454	3.02975	0.717729	0.472924	NA	ENSG00000275409	lncRNA
ENSG00000238288.1	0.322128	2.17449	5.94826	0.365568	0.714688	NA	MTND3P23	unprocessed_pseudogene
ENSG00000266922.1	0.19794	2.17413	5.94864	0.365484	0.71475	NA	ENSG00000266922	lncRNA
ENSG00000233762.3	0.726443	2.17387	2.2187	0.979793	0.327188	NA	RPS15P4	processed_pseudogene
ENSG00000181656.7	0.447342	2.17374	2.76488	0.786198	0.431751	NA	GPR88	protein_coding
ENSG00000279390.1	1.03668	2.17349	2.6293	0.826643	0.408439	NA	ENSG00000279390	TEC
ENSG00000281756.1	0.459783	2.1734	4.9428	0.43971	0.660147	NA	C2-AS1	lncRNA
ENSG00000254272.1	0.661531	2.17304	2.46717	0.880783	0.378435	NA	BTF3P3	processed_pseudogene
ENSG00000251423.3	0.359996	2.17276	4.21582	0.515381	0.606287	NA	ENSG00000251423	lncRNA
ENSG00000278068.1	0.798336	2.17256	3.15946	0.687635	0.491682	NA	ENSG00000278068	processed_pseudogene
ENSG00000287207.1	0.664773	2.17245	2.47246	0.87866	0.379585	NA	ENSG00000287207	lncRNA
ENSG00000286858.1	0.349257	2.17177	5.1171	0.424414	0.671264	NA	ENSG00000286858	lncRNA
ENSG00000249894.1	2.62742	2.17173	1.43174	1.51685	0.129306	NA	ENSG00000249894	lncRNA
ENSG00000100121	0.485129	2.17112	3.55066	0.611468	0.54089	NA	GGTLC2	protein_coding
ENSG00000242071.3	0.559227	2.17016	2.77714	0.781438	0.434545	NA	RPL7AP6	processed_pseudogene
ENSG00000224891.1	1.07355	2.17012	2.69206	0.806119	0.420174	NA	ARL14EPP1	processed_pseudogene
ENSG00000245482.2	1.59504	2.17009	5.83959	0.371616	0.710179	NA	ENSG00000245482	lncRNA
ENSG00000187690.4	0.318101	2.17003	5.19816	0.417461	0.676341	NA	EZHIP	protein_coding
ENSG00000286686.1	0.40525	2.17002	5.94863	0.364794	0.715265	NA	ENSG00000286686	lncRNA
ENSG00000214784.4	0.619556	2.17001	2.55742	0.848513	0.396152	NA	RPS3AP21	processed_pseudogene
ENSG00000167183.3	0.699308	2.16844	2.15925	1.00426	0.315256	NA	PRR15L	protein_coding
ENSG00000244722.1	0.202042	2.1683	5.94868	0.364502	0.715483	NA	RPSAP29	processed_pseudogene
ENSG00000285518.1	0.649317	2.16825	2.36294	0.917608	0.358824	NA	ENSG00000285518	lncRNA
ENSG00000236977.1	0.323587	2.16726	4.30032	0.503976	0.614278	NA	ANKRD44-IT1	lncRNA
ENSG00000277589.1	2.30319	2.16717	1.53103	1.4155	0.156922	NA	ENSG00000277589	lncRNA
ENSG00000234995.1	0.394942	2.16545	5.94872	0.36402	0.715843	NA	RPS3AP28	processed_pseudogene
ENSG00000224205.2	0.73787	2.16533	2.49016	0.869553	0.384545	NA	GSTT3P	transcribed_unprocessed_pseudogene
ENSG00000250929.2	0.649868	2.16472	2.61774	0.826941	0.408271	NA	LINC01181	lncRNA
ENSG00000271714.1	5.7696	2.16435	0.857352	2.52446	0.0115877	NA	ENSG00000271714	lncRNA
ENSG00000285926.1	1.22366	2.16431	2.11479	1.02342	0.306111	NA	ENSG00000285926	lncRNA
ENSG00000168754.15	2.02248	2.16382	1.90652	1.13496	0.256393	NA	FAM178B	protein_coding
ENSG00000233328.3	0.9326	2.16363	2.304	0.939073	0.347693	NA	PFN1P1	processed_pseudogene
ENSG00000213994.3	0.447153	2.16337	3.09466	0.699066	0.484511	NA	ENSG00000213994	lncRNA
ENSG00000174992.8	0.501269	2.1626	3.48157	0.621158	0.534496	NA	ZG16	protein_coding
ENSG00000240086.7	11.0724	2.16131	1.31557	1.64288	0.100408	0.355633	ENSG00000240086	lncRNA
ENSG00000258417.3	0.436054	2.16118	3.58942	0.602097	0.547109	NA	ENSG00000258417	protein_coding
ENSG00000250424.4	0.155649	2.16043	5.94905	0.363156	0.716489	NA	ENSG00000250424	protein_coding
ENSG00000243498.2	0.309405	2.15982	5.15974	0.41859	0.675516	NA	UBA52P5	processed_pseudogene
ENSG00000228604.3	0.612221	2.15975	2.72117	0.793685	0.427379	NA	ENSG00000228604	lncRNA
ENSG00000256892	0.404855	2.15928	4.80494	0.449387	0.653153	NA	NA	NA
ENSG00000288583.1	0.628103	2.15892	2.47961	0.87067	0.383934	NA	ENSG00000288583	lncRNA
ENSG00000248633.1	0.601566	2.1578	3.92286	0.550058	0.58228	NA	GET1P1	transcribed_processed_pseudogene
ENSG00000225883.2	0.6984	2.15743	3.01471	0.715634	0.474217	NA	BMS1P11	unprocessed_pseudogene
ENSG00000228115.1	0.520001	2.1563	3.55616	0.606355	0.544279	NA	ENSG00000228115	lncRNA
ENSG00000253245.2	0.329714	2.15562	5.17776	0.416322	0.677175	NA	MTND1P36	processed_pseudogene
ENSG00000275355.1	0.161151	2.15558	5.94925	0.362327	0.717107	NA	Metazoa_SRP	misc_RNA
ENSG00000282911.1	0.197352	2.15472	5.94886	0.362207	0.717197	NA	DUX4L35	unprocessed_pseudogene
ENSG00000173093.13	0.229414	2.15455	5.96853	0.360985	0.71811	NA	CCDC63	protein_coding
ENSG00000286515.1	0.158829	2.15417	5.94913	0.362098	0.717279	NA	ENSG00000286515	lncRNA
ENSG00000141977.9	0.62059	2.15379	3.17533	0.678289	0.497589	NA	CIB3	protein_coding
ENSG00000270772.1	0.272096	2.1532	5.94951	0.361912	0.717418	NA	PDHA1P1	processed_pseudogene
ENSG00000279841.1	0.999682	2.15315	2.28835	0.940919	0.346747	NA	ENSG00000279841	TEC
ENSG00000267745.1	13.4545	2.1531	0.748296	2.87734	0.00401043	0.0417107	ENSG00000267745	lncRNA
ENSG00000168060.16	3.15302	2.15304	1.56888	1.37234	0.169956	NA	NAALADL1	protein_coding
ENSG00000214097.5	0.466933	2.1519	4.94579	0.435098	0.663492	NA	SMCO1	protein_coding
ENSG00000276223.1	0.318976	2.14981	5.94919	0.361362	0.717829	NA	ENSG00000276223	lncRNA
ENSG00000233469.1	1.23526	2.14904	2.0177	1.06509	0.286833	NA	ST6GALNAC4P1	processed_pseudogene
ENSG00000232692.1	7.96286	2.14819	0.869792	2.46977	0.0135198	0.0982252	ENSG00000232692	lncRNA
ENSG00000271127.2	6.71063	2.14724	1.15527	1.85864	0.0630785	0.269386	ENSG00000271127	transcribed_unprocessed_pseudogene
ENSG00000282925.1	0.240906	2.14671	5.94969	0.360811	0.718241	NA	ENSG00000282925	lncRNA
ENSG00000228510.2	0.614895	2.14627	3.05082	0.703505	0.481741	NA	ENSG00000228510	processed_pseudogene
ENSG00000230202.1	1.04299	2.14363	2.34498	0.914135	0.360646	NA	ENSG00000230202	processed_pseudogene
ENSG00000264668.2	1.16881	2.14278	3.85733	0.555508	0.578547	NA	ENSG00000264668	protein_coding
ENSG00000262874.2	0.482004	2.14186	3.15766	0.678305	0.497578	NA	C19orf84	protein_coding
ENSG00000185028.4	0.39891	2.14156	4.19854	0.510072	0.610001	NA	LRRC14B	protein_coding
ENSG00000230125.1	0.118007	2.14152	5.94983	0.35993	0.7189	NA	EEF1A1P39	processed_pseudogene
ENSG00000240074.1	0.118007	2.14152	5.94983	0.35993	0.7189	NA	RPL9P30	processed_pseudogene
ENSG00000256569.1	0.118007	2.14152	5.94983	0.35993	0.7189	NA	ENSG00000256569	lncRNA
ENSG00000262031.1	0.118007	2.14152	5.94983	0.35993	0.7189	NA	LINC01974	lncRNA
ENSG00000286154.1	0.118007	2.14152	5.94983	0.35993	0.7189	NA	ENSG00000286154	lncRNA
ENSG00000258922.1	0.593715	2.14144	3.1188	0.686622	0.492321	NA	ENSG00000258922	lncRNA
ENSG00000273950.1	0.99641	2.14087	2.3133	0.925459	0.354727	NA	Metazoa_SRP	misc_RNA
ENSG00000253767.3	2.38545	2.14066	1.29903	1.64789	0.0993742	NA	PCDHGA8	protein_coding
ENSG00000219712.1	0.436557	2.13983	4.992	0.428652	0.668176	NA	ENSG00000219712	processed_pseudogene
ENSG00000254270.1	1.01754	2.13841	2.41626	0.885011	0.376151	NA	ERHP1	processed_pseudogene
ENSG00000260092.1	0.47442	2.13814	5.94993	0.359355	0.71933	NA	ENSG00000260092	protein_coding
ENSG00000228589.3	2.21186	2.13699	3.15256	0.677857	0.497862	NA	SPCS2P4	processed_pseudogene
ENSG00000267054.1	0.193127	2.13637	5.94998	0.359056	0.719553	NA	ENSG00000267054	lncRNA
ENSG00000272922.1	0.765443	2.13608	3.11009	0.686822	0.492195	NA	ENSG00000272922	lncRNA
ENSG00000233888.2	0.289019	2.13589	5.94999	0.358973	0.719615	NA	MTCO2P17	unprocessed_pseudogene
ENSG00000271749.1	0.4844	2.13586	2.76478	0.772526	0.439803	NA	ENSG00000271749	unprocessed_pseudogene
ENSG00000247033.1	0.353304	2.13575	5.94999	0.358949	0.719633	NA	ENSG00000247033	lncRNA
ENSG00000188375.5	0.321046	2.13571	5.94999	0.358942	0.719638	NA	H3-5	protein_coding
ENSG00000165078.13	0.853371	2.13518	2.37324	0.899689	0.368286	NA	CPA6	protein_coding
ENSG00000261263.2	0.245027	2.1347	5.95002	0.358771	0.719766	NA	ENSG00000261263	transcribed_processed_pseudogene
ENSG00000240045.2	0.242426	2.13466	5.95002	0.358764	0.719771	NA	STRIT1	protein_coding
ENSG00000224117.1	0.439003	2.13403	3.61729	0.589954	0.555222	NA	PTPN2P2	processed_pseudogene
ENSG00000230499.1	0.761134	2.13384	2.59265	0.823034	0.410489	NA	ENSG00000230499	lncRNA
ENSG00000233460.1	0.241412	2.13264	5.95008	0.358422	0.720028	NA	RPL35AP31	processed_pseudogene
ENSG00000248746.6	1.19359	2.13045	1.86009	1.14534	0.252067	NA	ACTN3	protein_coding
ENSG00000227154.4	0.160631	2.13017	5.95015	0.358003	0.720341	NA	MKRN6P	unprocessed_pseudogene
ENSG00000280121.1	0.156721	2.12974	5.95016	0.35793	0.720395	NA	ENSG00000280121	TEC
ENSG00000248466.1	0.159309	2.12962	5.95017	0.35791	0.720411	NA	ENSG00000248466	processed_pseudogene
ENSG00000163606.11	1.30949	2.12897	2.14616	0.991993	0.321201	NA	CD200R1	protein_coding
ENSG00000273011.1	0.327629	2.12888	5.95019	0.357783	0.720505	NA	ENSG00000273011	lncRNA
ENSG00000287155.1	0.485262	2.1261	4.02407	0.528346	0.597259	NA	ENSG00000287155	lncRNA
ENSG00000258648.1	0.569416	2.12589	3.43602	0.618707	0.536109	NA	UBE2CP1	processed_pseudogene
ENSG00000248694.1	0.284015	2.1248	5.9503	0.357092	0.721023	NA	ENSG00000248694	lncRNA
ENSG00000258728	0.359099	2.12444	5.95031	0.35703	0.72107	NA	ENSG00000258728	protein_coding
ENSG00000179299.17	0.865903	2.1243	3.80021	0.558995	0.576165	NA	NSUN7	protein_coding
ENSG00000274560.1	0.197098	2.12423	5.95032	0.356995	0.721095	NA	ENSG00000274560	lncRNA
ENSG00000278713.1	0.493557	2.12369	5.95033	0.356903	0.721164	NA	ENSG00000278713	lncRNA
ENSG00000254571.1	0.620111	2.12283	3.56372	0.595677	0.551391	NA	ENSG00000254571	lncRNA
ENSG00000188508.11	1.24899	2.12086	2.13059	0.995431	0.319527	NA	KRTDAP	protein_coding
ENSG00000286032.1	7.30841	2.11571	0.881225	2.40088	0.0163557	0.112003	ENSG00000286032	TEC
ENSG00000285723.1	11.8621	2.11515	1.18323	1.7876	0.0738409	0.296481	MKKS	protein_coding
ENSG00000166634.7	3.31034	2.11358	2.15986	0.978576	0.327789	NA	SERPINB12	protein_coding
ENSG00000170214.5	7.72807	2.1066	1.81671	1.15957	0.246225	0.57423	ADRA1B	protein_coding
ENSG00000170608.3	14.6498	2.10629	0.855028	2.46341	0.0137622	0.0993011	FOXA3	protein_coding
ENSG00000256632.3	1.73534	2.1029	1.95452	1.07592	0.281964	NA	ENSG00000256632	lncRNA
ENSG00000226965.2	0.395645	2.09856	5.94936	0.352737	0.724286	NA	ENSG00000226965	lncRNA
ENSG00000179399.15	47.1167	2.09775	0.436824	4.80229	1.56863e-06	6.56208e-05	GPC5	protein_coding
ENSG00000279716.1	11.6741	2.09345	3.58034	0.584706	0.558745	0.830114	ENSG00000279716	TEC
ENSG00000198429.10	2.27964	2.09258	1.45432	1.43887	0.150188	NA	ZNF69	protein_coding
ENSG00000154258.17	6.47719	2.08473	0.952663	2.18832	0.028646	0.162184	ABCA9	protein_coding
ENSG00000132872.12	0.81376	2.0846	3.88742	0.536243	0.59179	NA	SYT4	protein_coding
ENSG00000141433.13	6.48507	2.08407	1.31751	1.58183	0.113689	0.381768	ADCYAP1	protein_coding
ENSG00000163092	0.340829	2.0827	5.96019	0.349436	0.726762	NA	XIRP2	protein_coding
ENSG00000253138.5	1.09239	2.08105	1.98853	1.04653	0.295317	NA	LINC00967	lncRNA
ENSG00000229613	0.269769	2.0806	5.95027	0.349664	0.726591	NA	LINC01501	lncRNA
ENSG00000163705.13	1.61167	2.07832	1.61556	1.28644	0.198289	NA	FANCD2OS	protein_coding
ENSG00000143278.5	0.821294	2.07794	2.41378	0.860864	0.389313	NA	F13B	protein_coding
ENSG00000106927.12	2.29146	2.07601	1.59482	1.30172	0.193013	NA	AMBP	protein_coding
ENSG00000259405.1	0.189982	2.0751	5.96087	0.348121	0.727749	NA	ISCA1P4	processed_pseudogene
ENSG00000250634.6	1.86594	2.07342	1.94695	1.06496	0.286895	NA	LINC01182	lncRNA
ENSG00000237301.1	2.26643	2.07135	1.64945	1.25579	0.209193	NA	ENSG00000237301	lncRNA
ENSG00000232000	0.994198	2.07095	2.41105	0.858941	0.390373	NA	CLCN3P1	transcribed_unprocessed_pseudogene
ENSG00000215644.10	21.0769	2.07077	1.64394	1.25964	0.2078	0.528198	GCGR	protein_coding
ENSG00000276282.1	1.06992	2.06952	1.66971	1.23945	0.215177	NA	ENSG00000276282	lncRNA
ENSG00000233892.1	3.14173	2.06743	1.2161	1.70005	0.0891208	NA	PAIP1P1	processed_pseudogene
ENSG00000146038.12	1.69378	2.06731	1.7215	1.20088	0.229799	NA	DCDC2	protein_coding
ENSG00000287594	14.9739	2.06514	0.816947	2.52788	0.0114754	0.0883532	ENSG00000287594	lncRNA
ENSG00000285627.1	1.78011	2.05664	1.64803	1.24793	0.212055	NA	ENSG00000285627	lncRNA
ENSG00000107518.18	77.0234	2.05	0.331724	6.17983	6.41689e-10	6.7864e-08	ATRNL1	protein_coding
ENSG00000251143.1	22.5396	2.04864	0.653013	3.13721	0.00170565	0.0218999	ENSG00000251143	lncRNA
ENSG00000253848.1	2.96862	2.04532	1.48035	1.38164	0.167083	NA	RBM12B-DT	lncRNA
ENSG00000216471.3	1.58468	2.04335	1.615	1.26523	0.205787	NA	RPSAP43	processed_pseudogene
ENSG00000100373.10	0.134194	2.03859	5.96887	0.341537	0.7327	NA	UPK3A	protein_coding
ENSG00000277566.1	2.01488	2.03781	1.56734	1.30017	0.193542	NA	ENSG00000277566	lncRNA
ENSG00000165443.12	1.25712	2.03754	3.14174	0.648537	0.516638	NA	PHYHIPL	protein_coding
ENSG00000232827.3	1.88859	2.03509	2.12452	0.957907	0.33811	NA	LINC01189	lncRNA
ENSG00000128262.8	1.44297	2.03462	2.0435	0.995654	0.319418	NA	POM121L9P	transcribed_unprocessed_pseudogene
ENSG00000248677.2	2.56734	2.0343	1.61121	1.26259	0.206736	NA	LINC02102	lncRNA
ENSG00000182632.15	0.825186	2.02942	1.95537	1.03787	0.299331	NA	CCNYL2	transcribed_unprocessed_pseudogene
ENSG00000110786.18	7.43365	2.02809	1.52353	1.33118	0.183129	0.492769	PTPN5	protein_coding
ENSG00000286961	0.893786	2.02478	2.66586	0.759524	0.447539	NA	ENSG00000286961	lncRNA
ENSG00000228218.1	7.45486	2.02144	0.77739	2.60028	0.00931465	0.076604	ATF4P3	processed_pseudogene
ENSG00000180644.8	0.720366	2.02102	4.04701	0.499387	0.617507	NA	PRF1	protein_coding
ENSG00000154162.15	5.14543	2.02087	1.43581	1.40748	0.159286	NA	CDH12	protein_coding
ENSG00000279200.1	6.91442	2.01965	0.944351	2.13866	0.0324629	0.174954	ENSG00000279200	TEC
ENSG00000117834.13	0.432442	2.01062	4.97326	0.404287	0.686002	NA	SLC5A9	protein_coding
ENSG00000175920.18	9.88308	2.0076	0.853671	2.35173	0.0186865	0.122688	DOK7	protein_coding
ENSG00000262339.5	0.205942	2.00585	5.94951	0.337146	0.736007	NA	ENSG00000262339	lncRNA
ENSG00000264113.2	0.462847	2.00557	4.84512	0.413936	0.678921	NA	RN7SL784P	misc_RNA
ENSG00000256381.1	1.11696	2.0045	2.59677	0.771919	0.440163	NA	ENSG00000256381	lncRNA
ENSG00000186510.12	1.91006	2.00396	2.96062	0.676873	0.498487	NA	CLCNKA	protein_coding
ENSG00000230116.1	0.257606	2.00246	5.92361	0.338047	0.735327	NA	RPS3AP11	processed_pseudogene
ENSG00000253649.5	4.15114	2.00091	1.33887	1.49448	0.135051	NA	PRSS51	protein_coding
ENSG00000237513	5.60947	2.00011	1.23847	1.61498	0.106315	NA	NA	NA
ENSG00000126856.16	3.31667	1.99197	1.09609	1.81734	0.0691648	NA	PRDM7	protein_coding
ENSG00000258983.2	0.368414	1.9913	5.92386	0.336149	0.736758	NA	ENSG00000258983	lncRNA
ENSG00000250166	0.908144	1.99075	2.00233	0.994218	0.320117	NA	C2CD5-AS1	lncRNA
ENSG00000232912.6	1.45006	1.98779	1.86665	1.06489	0.286924	NA	RERE-AS1	lncRNA
ENSG00000213492.2	0.25386	1.98768	5.4774	0.362888	0.716689	NA	NT5C3AP1	transcribed_processed_pseudogene
ENSG00000152611.12	0.705936	1.98579	2.28706	0.868275	0.385244	NA	CAPSL	protein_coding
ENSG00000279764.1	1.62541	1.98287	2.15226	0.921296	0.356896	NA	ENSG00000279764	TEC
ENSG00000224714.3	0.498904	1.98281	3.60999	0.549256	0.58283	NA	LINC02671	lncRNA
ENSG00000259692.6	3.92549	1.98277	1.19847	1.65441	0.0980433	NA	ENSG00000259692	lncRNA
ENSG00000157856.12	0.526645	1.98157	3.55263	0.557775	0.576998	NA	DRC1	protein_coding
ENSG00000220515.2	0.785124	1.98053	2.52088	0.785652	0.432071	NA	PGAM1P10	processed_pseudogene
ENSG00000188828.13	1.5412	1.98	1.8944	1.04519	0.295937	NA	GLRA4	transcribed_unitary_pseudogene
ENSG00000250569.1	4.50539	1.9797	1.08747	1.82047	0.0686879	NA	NTAN1P2	processed_pseudogene
ENSG00000224655.7	0.625388	1.97932	3.91312	0.505815	0.612986	NA	LINC01823	lncRNA
ENSG00000259017.1	1.27608	1.97905	1.80789	1.09467	0.273659	NA	ENSG00000259017	lncRNA
ENSG00000179520.11	0.827803	1.9789	2.91499	0.67887	0.49722	NA	SLC17A8	protein_coding
ENSG00000227201.2	1.93381	1.97842	1.70473	1.16055	0.245827	NA	CNN2P1	processed_pseudogene
ENSG00000214820.3	1.17054	1.97805	2.19793	0.899958	0.368143	NA	MPRIPP1	processed_pseudogene
ENSG00000230648.1	0.81668	1.9773	2.11117	0.936589	0.34897	NA	ENSG00000230648	lncRNA
ENSG00000161132.6	3.78947	1.97653	1.21768	1.62319	0.104548	NA	ENSG00000161132	unprocessed_pseudogene
ENSG00000250433.1	2.44232	1.97435	1.54082	1.28136	0.200067	NA	CLSTN2-AS1	lncRNA
ENSG00000287011.1	0.707279	1.97422	2.96723	0.665343	0.505831	NA	ENSG00000287011	lncRNA
ENSG00000112232.10	73.1863	1.97413	0.310929	6.34915	2.16506e-10	2.61264e-08	KHDRBS2	protein_coding
ENSG00000228554.1	1.65147	1.97386	1.87088	1.05504	0.291407	NA	ENSG00000228554	lncRNA
ENSG00000204571	1.68263	1.97217	1.85397	1.06376	0.287439	NA	KRTAP5-11	protein_coding
ENSG00000278950.1	4.24268	1.97192	1.60301	1.23014	0.218645	NA	ENSG00000278950	TEC
ENSG00000241307.1	0.886436	1.97182	2.50817	0.786159	0.431774	NA	RPL7AP24	processed_pseudogene
ENSG00000285673.1	0.372017	1.97038	5.9243	0.332593	0.739442	NA	ENSG00000285673	lncRNA
ENSG00000180019.6	0.171751	1.96986	5.96862	0.330035	0.741373	NA	ENSG00000180019	transcribed_processed_pseudogene
ENSG00000259371.2	1.21477	1.96943	1.68539	1.16853	0.242592	NA	ENSG00000259371	protein_coding
ENSG00000254656.3	3.98731	1.96938	1.60735	1.22524	0.220486	NA	RTL1	protein_coding
ENSG00000054938	4.09861	1.96844	1.44138	1.36566	0.172044	NA	CHRDL2	protein_coding
ENSG00000249936.3	1.06269	1.96769	2.48356	0.792287	0.428193	NA	RAC1P2	processed_pseudogene
ENSG00000215529	1.40564	1.96767	1.99865	0.984498	0.324871	NA	EFCAB8	protein_coding
ENSG00000259394.2	0.487672	1.96673	2.90418	0.677209	0.498273	NA	ENSG00000259394	processed_pseudogene
ENSG00000287449.1	0.917747	1.96609	1.80198	1.09107	0.275242	NA	ENSG00000287449	lncRNA
ENSG00000270919.1	1.54601	1.96591	1.72396	1.14035	0.254141	NA	ENSG00000270919	lncRNA
ENSG00000287101.1	1.04576	1.9655	1.7205	1.1424	0.253287	NA	ENSG00000287101	lncRNA
ENSG00000283317.1	1.23403	1.96542	1.85974	1.05682	0.290592	NA	ENSG00000283317	lncRNA
ENSG00000259151.2	1.87123	1.96502	1.68134	1.16872	0.242516	NA	CAP2P1	transcribed_processed_pseudogene
ENSG00000280198.1	5.4614	1.96394	0.898903	2.18482	0.0289022	NA	ENSG00000280198	TEC
ENSG00000285633.1	2.08788	1.96364	1.73473	1.13195	0.257653	NA	ENSG00000285633	lncRNA
ENSG00000258586.1	0.49309	1.96361	2.56148	0.766592	0.443324	NA	LINC02274	lncRNA
ENSG00000269935.1	0.744252	1.96346	2.03774	0.963549	0.335272	NA	ENSG00000269935	lncRNA
ENSG00000287619.1	1.61738	1.96201	1.5919	1.2325	0.217764	NA	ENSG00000287619	lncRNA
ENSG00000258591.2	1.4398	1.96089	1.69112	1.15953	0.246242	NA	PPIAP4	processed_pseudogene
ENSG00000215223.3	0.522777	1.96084	3.44844	0.568616	0.569616	NA	CYP51A1P3	processed_pseudogene
ENSG00000229344.1	0.872283	1.96048	2.00787	0.976397	0.328868	NA	MTCO2P12	unprocessed_pseudogene
ENSG00000231507	0.3453	1.9588	5.96238	0.328527	0.742513	NA	LINC01353	lncRNA
ENSG00000176020.9	48.6563	1.9566	1.47358	1.32779	0.184249	0.49393	AMIGO3	protein_coding
ENSG00000187268.12	4.79377	1.95587	1.0006	1.95469	0.0506199	NA	FAM9C	protein_coding
ENSG00000166473	4.87834	1.95538	1.25314	1.56039	0.118667	NA	PKD1L2	protein_coding
ENSG00000116183.11	0.88265	1.95458	2.18328	0.895247	0.370655	NA	PAPPA2	protein_coding
ENSG00000231189.1	2.35609	1.9537	1.61914	1.20662	0.227577	NA	ENSG00000231189	lncRNA
ENSG00000104941.8	0.604014	1.95317	2.48984	0.784456	0.432773	NA	RSPH6A	protein_coding
ENSG00000261173	1.48625	1.95108	1.68867	1.15539	0.247929	NA	DNAJA2-DT	lncRNA
ENSG00000224292.1	1.00277	1.95039	1.94278	1.00392	0.315417	NA	PORCN-DT	lncRNA
ENSG00000267648.1	8.75046	1.95	0.875307	2.22779	0.0258946	0.152376	ENSG00000267648	transcribed_processed_pseudogene
ENSG00000165125.22	2.26846	1.94979	1.93694	1.00663	0.314112	NA	TRPV6	protein_coding
ENSG00000267076.1	1.57308	1.94778	1.62605	1.19786	0.230971	NA	MIX23P3	processed_pseudogene
ENSG00000258851.1	0.965963	1.94603	1.89316	1.02793	0.303983	NA	ENSG00000258851	lncRNA
ENSG00000234042.1	1.22392	1.94518	1.7888	1.08742	0.276852	NA	ENSG00000234042	processed_pseudogene
ENSG00000248909.1	0.627594	1.94486	2.39316	0.812673	0.416405	NA	HMGB1P21	processed_pseudogene
ENSG00000238181.2	1.28589	1.94387	1.73121	1.12284	0.261507	NA	AHCYP2	processed_pseudogene
ENSG00000257764.2	0.536749	1.94306	3.4123	0.569427	0.569066	NA	ENSG00000257764	lncRNA
ENSG00000134376.17	7.46295	1.9429	1.3598	1.42882	0.153057	0.450625	CRB1	protein_coding
ENSG00000280062.1	0.9911	1.94277	1.81656	1.06948	0.284855	NA	ENSG00000280062	TEC
ENSG00000247228.3	3.10342	1.94247	1.46799	1.32321	0.185765	NA	ENSG00000247228	lncRNA
ENSG00000124469.12	5.26208	1.94229	1.24628	1.55847	0.119122	NA	CEACAM8	protein_coding
ENSG00000123453	10.0491	1.94086	1.22979	1.57821	0.114517	0.383239	SARDH	protein_coding
ENSG00000253334.1	0.729048	1.94046	2.18751	0.887066	0.375043	NA	ENSG00000253334	lncRNA
ENSG00000260331.1	2.09151	1.93981	1.79582	1.08018	0.280062	NA	ENSG00000260331	lncRNA
ENSG00000250869.2	0.646195	1.9365	2.47437	0.782626	0.433847	NA	ENSG00000250869	unprocessed_pseudogene
ENSG00000189292.16	34.6549	1.93647	1.11906	1.73044	0.083551	0.318777	ALKAL2	protein_coding
ENSG00000240418.1	0.840013	1.93581	2.86116	0.676583	0.498671	NA	ENSG00000240418	processed_pseudogene
ENSG00000174226.9	0.351671	1.93472	4.32112	0.447736	0.654344	NA	SNX31	protein_coding
ENSG00000170396.9	104.184	1.93401	0.310652	6.22565	4.79572e-10	5.18847e-08	ZNF804A	protein_coding
ENSG00000234724.1	0.96501	1.93303	1.74929	1.10504	0.269143	NA	HDAC1P1	processed_pseudogene
ENSG00000227695.6	0.648547	1.92926	2.9942	0.644331	0.519361	NA	DNMBP-AS1	lncRNA
ENSG00000164007.11	1.21973	1.92748	2.11761	0.910214	0.36271	NA	CLDN19	protein_coding
ENSG00000204420.10	2.55463	1.92661	1.47746	1.304	0.192234	NA	MPIG6B	protein_coding
ENSG00000236780.7	0.670916	1.92656	2.86761	0.671833	0.50169	NA	LINC01829	lncRNA
ENSG00000122188.13	0.453679	1.92596	4.20246	0.458294	0.646741	NA	LAX1	protein_coding
ENSG00000286606.1	2.38632	1.92592	1.6674	1.15504	0.248073	NA	ENSG00000286606	lncRNA
ENSG00000141431	81.8057	1.92321	0.546804	3.51719	0.000436148	0.00758824	ASXL3	protein_coding
ENSG00000133134.12	0.810731	1.92275	2.60135	0.739136	0.459824	NA	BEX2	protein_coding
ENSG00000225067.4	2.1254	1.92054	1.73572	1.10648	0.26852	NA	RPL23AP2	processed_pseudogene
ENSG00000232710.1	2.03917	1.91967	1.84769	1.03896	0.298825	NA	ENSG00000232710	lncRNA
ENSG00000261888.1	4.00744	1.91947	1.25705	1.52696	0.126772	NA	ENSG00000261888	lncRNA
ENSG00000204173.11	3.49659	1.9193	1.29829	1.47834	0.139317	NA	LRRC37A5P	transcribed_unprocessed_pseudogene
ENSG00000262560.1	2.83531	1.91851	1.88461	1.01799	0.308682	NA	ENSG00000262560	protein_coding
ENSG00000277301.1	2.44795	1.91782	1.33452	1.43709	0.150693	NA	ENSG00000277301	lncRNA
ENSG00000253923.2	1.63658	1.91583	1.42584	1.34364	0.179063	NA	ENSG00000253923	processed_pseudogene
ENSG00000261141.1	0.862187	1.91481	2.2261	0.860163	0.389699	NA	ENSG00000261141	lncRNA
ENSG00000250305.9	70.7992	1.91457	0.709498	2.69849	0.00696549	0.0627074	TRMT9B	protein_coding
ENSG00000170075.10	7.17971	1.91123	1.08747	1.7575	0.0788322	0.309164	GPR37L1	protein_coding
ENSG00000166596.15	2.54354	1.91103	1.74484	1.09524	0.27341	NA	CFAP52	protein_coding
ENSG00000172927	1.36957	1.91084	2.01672	0.947499	0.343385	NA	MYEOV	protein_coding
ENSG00000224631.4	0.603077	1.90904	2.51277	0.759738	0.447411	NA	RPS27AP16	transcribed_processed_pseudogene
ENSG00000288028.1	3.57465	1.90763	1.32417	1.44062	0.149691	NA	ENSG00000288028	lncRNA
ENSG00000186562.8	1.83275	1.90757	1.88224	1.01346	0.310842	NA	DEFB105A	protein_coding
ENSG00000233221.7	5.45614	1.90601	0.861846	2.21154	0.0269982	NA	ARHGEF4-AS1	lncRNA
ENSG00000225950	5.5713	1.90586	1.26121	1.51113	0.130754	NA	NTF4	protein_coding
ENSG00000285629.1	2.52697	1.90392	1.60006	1.1899	0.234084	NA	ENSG00000285629	protein_coding
ENSG00000182348.7	0.209077	1.90302	5.96612	0.318971	0.749749	NA	ZNF804B	protein_coding
ENSG00000250742	1.96838	1.90012	1.75094	1.0852	0.277833	NA	LINC02381	lncRNA
ENSG00000229520	15.2503	1.89964	0.876365	2.16763	0.0301868	0.167433	LINC00404	lncRNA
ENSG00000176716.5	3.2857	1.89801	1.52635	1.24349	0.213687	NA	OR10AB1P	transcribed_unprocessed_pseudogene
ENSG00000273079.7	49.871	1.8955	2.11399	0.896649	0.369906	0.697534	GRIN2B	protein_coding
ENSG00000237422	1.83802	1.89233	1.75588	1.07771	0.281165	NA	ENSG00000237422	lncRNA
ENSG00000239482.6	7.92519	1.89196	0.861463	2.19622	0.0280763	0.160288	ENSG00000239482	lncRNA
ENSG00000196353	33.3185	1.89042	0.973399	1.94209	0.0521267	0.239046	CPNE4	protein_coding
ENSG00000166405	4.98598	1.88855	1.90191	0.992974	0.320723	NA	RIC3	protein_coding
ENSG00000041353.10	11.1143	1.88732	1.53619	1.22857	0.219233	0.542891	RAB27B	protein_coding
ENSG00000286596.1	45.1521	1.88725	0.40024	4.71529	2.41363e-06	9.54549e-05	ENSG00000286596	lncRNA
ENSG00000237927.1	1.30101	1.88381	2.28801	0.823339	0.410315	NA	ENSG00000237927	lncRNA
ENSG00000225905.1	1.97384	1.88256	1.45124	1.29721	0.194559	NA	ANKRD65-AS1	lncRNA
ENSG00000112706.12	3.59395	1.88238	1.77598	1.05991	0.289186	NA	IMPG1	protein_coding
ENSG00000125409.13	1.90271	1.88098	1.70551	1.10288	0.270079	NA	TEKT3	protein_coding
ENSG00000134765.10	2.15496	1.87985	1.21754	1.54397	0.122596	NA	DSC1	protein_coding
ENSG00000288595	2.22472	1.87864	1.32561	1.41719	0.156427	NA	ENSG00000288595	lncRNA
ENSG00000254946.2	0.692138	1.87821	3.21169	0.584803	0.55868	NA	LINC02751	lncRNA
ENSG00000174448	1.86904	1.87769	1.38669	1.35408	0.17571	NA	STARD6	protein_coding
ENSG00000228655.7	0.240911	1.87701	5.95555	0.315171	0.752632	NA	ENSG00000228655	lncRNA
ENSG00000257275.6	1.0038	1.87481	1.95712	0.957941	0.338093	NA	ENSG00000257275	lncRNA
ENSG00000235494.2	0.8752	1.87297	2.63749	0.710132	0.477622	NA	ENSG00000235494	lncRNA
ENSG00000102271.14	6.1038	1.8698	1.38092	1.35403	0.175727	NA	KLHL4	protein_coding
ENSG00000083290.20	4.38277	1.865	0.937241	1.98988	0.0466042	NA	ULK2	protein_coding
ENSG00000172901	4.82863	1.86306	1.3056	1.42698	0.153586	NA	LVRN	protein_coding
ENSG00000235545.1	2.52163	1.86253	1.22944	1.51494	0.129789	NA	DOCK7-DT	lncRNA
ENSG00000176134.5	1.18474	1.85885	3.32824	0.55851	0.576496	NA	ENSG00000176134	transcribed_unprocessed_pseudogene
ENSG00000188730.5	36.883	1.85748	0.399823	4.64575	3.38845e-06	0.000130445	VWC2	protein_coding
ENSG00000225611	3.12777	1.85731	1.1501	1.61491	0.106331	NA	CCDC13-AS2	lncRNA
ENSG00000244791.3	0.385296	1.85671	4.21533	0.440467	0.659599	NA	ENSG00000244791	lncRNA
ENSG00000284977	3.63787	1.85668	1.51609	1.22464	0.220709	NA	ENSG00000284977	lncRNA
ENSG00000268047.1	4.54336	1.85577	0.849151	2.18545	0.0288562	NA	ENSG00000268047	lncRNA
ENSG00000274177.1	1.44711	1.85376	2.45945	0.753732	0.45101	NA	ENSG00000274177	lncRNA
ENSG00000234928	2.73313	1.84995	1.24759	1.48282	0.138123	NA	LINC01659	lncRNA
ENSG00000269026.2	4.2099	1.84604	1.75572	1.05145	0.293052	NA	ENSG00000269026	protein_coding
ENSG00000164112.14	46.3045	1.84506	0.511589	3.60654	0.000310309	0.0057723	SMIM43	protein_coding
ENSG00000164120.14	235.982	1.84392	0.315851	5.83795	5.28481e-09	4.69276e-07	HPGD	protein_coding
ENSG00000167094.16	0.793327	1.84259	2.05664	0.895926	0.370292	NA	TTC16	protein_coding
ENSG00000117971.12	2.82849	1.84258	1.38718	1.32829	0.184083	NA	CHRNB4	protein_coding
ENSG00000112782.19	8.95925	1.84188	1.32168	1.39359	0.163441	0.464839	CLIC5	protein_coding
ENSG00000138769.11	0.954898	1.84173	2.71535	0.678267	0.497602	NA	CDKL2	protein_coding
ENSG00000250938	0.857304	1.84055	2.43292	0.756518	0.449339	NA	MAD2L1-DT	lncRNA
ENSG00000250934	4.85604	1.84045	1.05558	1.74354	0.0812396	NA	ENSG00000250934	lncRNA
ENSG00000221994.12	0.979416	1.84032	2.13912	0.860314	0.389616	NA	ZNF630	protein_coding
ENSG00000050628	703.8	1.83921	0.296027	6.21297	5.19909e-10	5.59274e-08	PTGER3	protein_coding
ENSG00000104332.12	1011.13	1.83839	0.698183	2.6331	0.00846085	0.0720449	SFRP1	protein_coding
ENSG00000147256.12	1.12636	1.83337	2.03153	0.90246	0.366813	NA	ARHGAP36	protein_coding
ENSG00000143217.9	2.22928	1.83232	1.72901	1.05975	0.289258	NA	NECTIN4	protein_coding
ENSG00000260625	1.30374	1.83127	1.71219	1.06955	0.284821	NA	RUSF1-DT	lncRNA
ENSG00000234492	3.97009	1.82902	1.1443	1.59838	0.109959	NA	RPL34-DT	lncRNA
ENSG00000237575.4	9.09379	1.82706	0.694385	2.63119	0.00850866	0.0722814	PYY2	transcribed_unprocessed_pseudogene
ENSG00000286235.1	6.08052	1.82645	1.67857	1.0881	0.276552	NA	ENSG00000286235	protein_coding
ENSG00000265788.2	1.96167	1.82446	1.7386	1.04939	0.294	NA	NOS2P1	transcribed_unprocessed_pseudogene
ENSG00000180209.12	1.32269	1.8205	1.80975	1.00594	0.314442	NA	MYLPF	protein_coding
ENSG00000138161.14	0.12769	1.81842	5.97321	0.30443	0.7608	NA	CUZD1	protein_coding
ENSG00000259868.3	7.6144	1.81675	1.0215	1.77852	0.0753185	0.300079	ENSG00000259868	lncRNA
ENSG00000203721	2.27851	1.80817	1.35907	1.33044	0.183373	NA	LINC00862	lncRNA
ENSG00000178217.15	0.159921	1.80567	5.97038	0.302439	0.762318	NA	SH2D4B	protein_coding
ENSG00000196408.12	2.0973	1.80513	1.73557	1.04008	0.298303	NA	NOXO1	protein_coding
ENSG00000134115.13	5.48486	1.80503	1.65024	1.0938	0.274043	NA	CNTN6	protein_coding
ENSG00000232586.1	7.98193	1.80282	1.44479	1.24781	0.212102	0.533479	KIAA1614-AS1	lncRNA
ENSG00000236989.5	2.13743	1.79994	1.799	1.00052	0.317058	NA	ENSG00000236989	lncRNA
ENSG00000206432.4	59.5603	1.79523	1.40236	1.28015	0.200492	0.51837	TMEM200C	protein_coding
ENSG00000262152.7	1.91701	1.79366	1.97451	0.908406	0.363664	NA	GREP1	protein_coding
ENSG00000249899.6	1.45151	1.79323	2.09186	0.857242	0.391311	NA	ITGA2-AS1	lncRNA
ENSG00000263818.5	1.43585	1.79278	1.71354	1.04624	0.295449	NA	RDM1P5	transcribed_processed_pseudogene
ENSG00000164220.7	1.43506	1.79275	2.02588	0.88492	0.3762	NA	F2RL2	protein_coding
ENSG00000285844.2	8.17552	1.79257	0.899898	1.99197	0.0463747	0.222514	KCNQ5-DT	lncRNA
ENSG00000257221.4	3.68089	1.78465	1.22468	1.45723	0.145053	NA	ENSG00000257221	lncRNA
ENSG00000270118.1	0.831029	1.77639	2.33174	0.761829	0.446162	NA	ENSG00000270118	lncRNA
ENSG00000223198.1	2.68952	1.77494	1.2889	1.37709	0.168483	NA	RNU2-22P	snRNA
ENSG00000236641.2	1.79509	1.77165	1.99966	0.885977	0.37563	NA	ENSG00000236641	lncRNA
ENSG00000271133	1.79983	1.76963	1.30216	1.359	0.174147	NA	ITGB8-AS1	lncRNA
ENSG00000248202.2	0.570855	1.768	2.73319	0.646864	0.51772	NA	LINC02234	lncRNA
ENSG00000081248.12	0.304976	1.76763	5.94326	0.297417	0.766148	NA	CACNA1S	protein_coding
ENSG00000152128.13	86.0447	1.76735	0.489512	3.61043	0.000305693	0.00569422	TMEM163	protein_coding
ENSG00000285554.1	1.06224	1.76352	1.78404	0.988498	0.322909	NA	LINC02988	lncRNA
ENSG00000269533.5	3.59628	1.76206	1.32437	1.33049	0.183356	NA	ENSG00000269533	protein_coding
ENSG00000142408.7	64.9279	1.76047	1.33336	1.32033	0.186726	0.497313	CACNG8	protein_coding
ENSG00000206181.7	1.86431	1.75997	1.6045	1.0969	0.272687	NA	ELOA2	protein_coding
ENSG00000232788.1	0.380395	1.75903	5.03927	0.349064	0.727041	NA	ITGA6-AS1	lncRNA
ENSG00000145642.12	0.208203	1.75898	5.96095	0.295084	0.76793	NA	SHISAL2B	protein_coding
ENSG00000048462.11	0.987962	1.75804	1.85114	0.949709	0.34226	NA	TNFRSF17	protein_coding
ENSG00000286863	1.49895	1.75749	1.8714	0.939131	0.347663	NA	ENSG00000286863	lncRNA
ENSG00000132855.5	2.51493	1.75657	1.66063	1.05777	0.29016	NA	ANGPTL3	protein_coding
ENSG00000273913.1	1.86106	1.75593	1.50996	1.16289	0.244873	NA	Metazoa_SRP	misc_RNA
ENSG00000183347.15	3.46298	1.75568	1.31085	1.33934	0.180459	NA	GBP6	protein_coding
ENSG00000285884	1.98846	1.75515	1.41531	1.24012	0.214932	NA	ENSG00000285884	lncRNA
ENSG00000230872.2	1.29658	1.75462	2.00854	0.87358	0.382347	NA	MFSD13B	transcribed_unitary_pseudogene
ENSG00000265713.1	1.67072	1.7535	1.50622	1.16418	0.244352	NA	ENSG00000265713	transcribed_processed_pseudogene
ENSG00000121871.4	97.4039	1.75268	0.488983	3.58433	0.00033794	0.00616446	SLITRK3	protein_coding
ENSG00000261963	4.42824	1.75243	1.40915	1.24361	0.213645	NA	NA	NA
ENSG00000280852.2	1.23687	1.7524	1.8844	0.929952	0.352396	NA	ENSG00000280852	transcribed_processed_pseudogene
ENSG00000228427	0.557605	1.75089	2.98726	0.586119	0.557796	NA	ENSG00000228427	lncRNA
ENSG00000277450.1	2.0824	1.74969	1.21744	1.43719	0.150665	NA	ENSG00000277450	lncRNA
ENSG00000236496.2	2.44096	1.74879	1.14896	1.52206	0.127994	NA	GPS2P1	processed_pseudogene
ENSG00000198885.10	0.51046	1.74855	3.62337	0.482576	0.629397	NA	ITPRIPL1	protein_coding
ENSG00000283689.1	10.0872	1.74822	0.759674	2.30128	0.0213761	0.133734	ENSG00000283689	lncRNA
ENSG00000147113.17	3.66466	1.7455	0.994814	1.7546	0.0793281	NA	DIPK2B	protein_coding
ENSG00000187135	90.322	1.74424	0.853988	2.04247	0.0411053	0.205137	VSTM2B	protein_coding
ENSG00000138722.10	6.01889	1.74185	1.05947	1.64408	0.100159	NA	MMRN1	protein_coding
ENSG00000272549.1	53.2294	1.7418	0.849569	2.05021	0.0403435	0.20261	LINC02538	lncRNA
ENSG00000270480.1	2.14199	1.74169	1.51193	1.15197	0.249335	NA	ENSG00000270480	processed_pseudogene
ENSG00000275263.1	2.85925	1.73975	1.4153	1.22925	0.218979	NA	ENSG00000275263	lncRNA
ENSG00000258590.5	8.93995	1.73834	1.0504	1.65493	0.0979382	0.350444	NBEAP1	transcribed_unprocessed_pseudogene
ENSG00000152034.11	0.805434	1.73753	2.16069	0.804152	0.421309	NA	MCHR2	protein_coding
ENSG00000287646.1	1.59916	1.73485	1.538	1.12799	0.259324	NA	ENSG00000287646	lncRNA
ENSG00000285650.1	2.90831	1.73473	1.32001	1.31417	0.188788	NA	ENSG00000285650	lncRNA
ENSG00000255362.1	3.88809	1.73454	1.05695	1.64109	0.100779	NA	LINC02761	lncRNA
ENSG00000279071.1	3.52252	1.73422	1.1693	1.48313	0.138041	NA	ENSG00000279071	TEC
ENSG00000233786.1	7.18577	1.73396	1.4728	1.17732	0.239067	0.566733	CDC27P1	processed_pseudogene
ENSG00000267583.5	2.16592	1.73085	1.34329	1.28852	0.197566	NA	ZNF24TR	lncRNA
ENSG00000172123.13	90.597	1.7306	0.371218	4.66195	3.13231e-06	0.000121329	SLFN12	protein_coding
ENSG00000189143.10	4.81109	1.72954	1.19457	1.44784	0.147662	NA	CLDN4	protein_coding
ENSG00000225362.10	0.412301	1.72944	5.04252	0.342971	0.73162	NA	CT62	lncRNA
ENSG00000204584.1	2.05621	1.72781	1.35816	1.27217	0.203313	NA	ENSG00000204584	lncRNA
ENSG00000273437.1	1.47896	1.72515	1.30578	1.32116	0.186447	NA	ENSG00000273437	lncRNA
ENSG00000250765.6	3.10208	1.72139	1.87307	0.91902	0.358085	NA	SEPTIN14P5	lncRNA
ENSG00000226797.2	0.733715	1.72007	3.46573	0.496309	0.619676	NA	ENSG00000226797	lncRNA
ENSG00000141485.17	18.6829	1.71976	0.735924	2.33687	0.019446	0.126319	SLC13A5	protein_coding
ENSG00000227454.2	1.22647	1.71839	1.97556	0.869825	0.384396	NA	MTND4P30	unprocessed_pseudogene
ENSG00000228069.1	1.15557	1.71537	1.80724	0.949167	0.342536	NA	MTCO3P29	unprocessed_pseudogene
ENSG00000239511.2	1.93647	1.71397	1.59712	1.07316	0.2832	NA	POM121L7P	processed_pseudogene
ENSG00000230133.2	0.274302	1.71327	5.97372	0.286802	0.774264	NA	LINC01721	lncRNA
ENSG00000183668.18	1.97225	1.70652	1.97365	0.864652	0.38723	NA	PSG9	protein_coding
ENSG00000286626	7.14797	1.70513	0.8481	2.01053	0.0443752	0.215968	ENSG00000286626	lncRNA
ENSG00000261738	0.711394	1.70438	5.97405	0.285298	0.775416	NA	MIR3976HG	lncRNA
ENSG00000228408.6	0.661454	1.70371	2.99945	0.568006	0.570031	NA	ENSG00000228408	lncRNA
ENSG00000220256.4	0.451871	1.70277	3.54314	0.480582	0.630813	NA	ENSG00000220256	lncRNA
ENSG00000286989.1	10.8935	1.70101	0.749981	2.26806	0.0233253	0.142247	ENSG00000286989	lncRNA
ENSG00000158764.7	0.41124	1.70033	4.24118	0.40091	0.688487	NA	ITLN2	protein_coding
ENSG00000181631.7	4.48783	1.69847	1.5833	1.07274	0.28339	NA	P2RY13	protein_coding
ENSG00000232626.3	1.80716	1.69811	1.59686	1.06341	0.287597	NA	ENSG00000232626	transcribed_processed_pseudogene
ENSG00000084453.17	7.80922	1.69743	0.867064	1.95768	0.050268	0.233769	SLCO1A2	protein_coding
ENSG00000233087.8	48.8891	1.6961	0.436148	3.8888	0.00010074	0.00227359	RAB6D	protein_coding
ENSG00000254231.3	4.05183	1.69365	1.57571	1.07485	0.282442	NA	WWP1-AS1	lncRNA
ENSG00000234705	0.483077	1.69178	2.9493	0.573621	0.566224	NA	HMGA1P4	lncRNA
ENSG00000162444.12	0.507959	1.69124	3.15808	0.535528	0.592284	NA	RBP7	protein_coding
ENSG00000101443.18	1.03492	1.6819	2.13489	0.787817	0.430804	NA	WFDC2	protein_coding
ENSG00000277809.1	27.2521	1.68162	0.483046	3.48129	0.000499014	0.00836561	ENSG00000277809	misc_RNA
ENSG00000251429.1	6.9442	1.68008	0.96602	1.73918	0.0820032	0.315558	AIDAP2	transcribed_processed_pseudogene
ENSG00000286951.1	1.0064	1.67956	2.99764	0.560295	0.575278	NA	ENSG00000286951	lncRNA
ENSG00000267314.1	1.52107	1.67885	2.23946	0.749669	0.453454	NA	ENSG00000267314	protein_coding
ENSG00000228097.1	0.548043	1.67663	3.0857	0.543356	0.586885	NA	MTATP6P11	unprocessed_pseudogene
ENSG00000228763.1	0.417827	1.67628	4.17356	0.401644	0.687946	NA	LIMS1-AS1	lncRNA
ENSG00000268941.2	0.294224	1.67537	5.93229	0.282416	0.777624	NA	LINC01711	lncRNA
ENSG00000140478	0.795774	1.67232	2.93054	0.570652	0.568235	NA	GOLGA6D	protein_coding
ENSG00000233818.1	0.266377	1.67057	5.97533	0.279578	0.779802	NA	CLDN14-AS1	lncRNA
ENSG00000213013.4	0.601614	1.67022	3.06128	0.545596	0.585343	NA	RPS15AP36	processed_pseudogene
ENSG00000275675.1	0.332629	1.66865	5.9327	0.281264	0.778508	NA	ENSG00000275675	unprocessed_pseudogene
ENSG00000272691.1	0.85826	1.66762	2.27347	0.733514	0.463245	NA	ENSG00000272691	lncRNA
ENSG00000107562	1.45757	1.66756	2.01867	0.826069	0.408765	NA	CXCL12	protein_coding
ENSG00000182870.13	3.46185	1.66753	1.68432	0.990034	0.322158	NA	GALNT9	protein_coding
ENSG00000055955.17	8.85399	1.66666	1.29292	1.28907	0.197375	0.513723	ITIH4	protein_coding
ENSG00000231689	0.166772	1.66608	5.97592	0.278799	0.780399	NA	LINC01090	lncRNA
ENSG00000183535.9	1.30711	1.66586	2.44768	0.680588	0.496132	NA	COL18A1-AS1	lncRNA
ENSG00000215571.5	0.970383	1.66581	2.1339	0.780639	0.435015	NA	GRK6P1	processed_pseudogene
ENSG00000261528.2	1.03065	1.66567	2.32495	0.716432	0.473725	NA	CCNYL7	processed_pseudogene
ENSG00000203797.12	0.604609	1.66558	2.218	0.75094	0.452689	NA	DDO	protein_coding
ENSG00000140107.12	0.556911	1.6649	2.58195	0.644822	0.519043	NA	SLC25A47	protein_coding
ENSG00000258806.2	0.291427	1.66339	5.93254	0.280385	0.779182	NA	OR11H7	protein_coding
ENSG00000267337.2	0.160629	1.66236	5.97565	0.278189	0.780867	NA	LINC01478	lncRNA
ENSG00000275538.1	0.213202	1.66191	5.93283	0.280121	0.779385	NA	RNVU1-19	snRNA
ENSG00000091129	319.252	1.66169	0.366873	4.52934	5.91673e-06	0.00021286	NRCAM	protein_coding
ENSG00000153246.13	2.28333	1.66163	2.14695	0.77395	0.438961	NA	PLA2R1	protein_coding
ENSG00000272281.6	3.5157	1.6611	1.50486	1.10382	0.269669	NA	TPTE2P2	transcribed_unprocessed_pseudogene
ENSG00000285747.1	0.837513	1.66055	2.02047	0.82186	0.411157	NA	ENSG00000285747	lncRNA
ENSG00000259100.1	0.776904	1.66004	2.48477	0.668088	0.504078	NA	COILP1	processed_pseudogene
ENSG00000259477.1	0.930585	1.6597	1.99111	0.833555	0.404532	NA	ENSG00000259477	processed_pseudogene
ENSG00000285480.2	0.992438	1.65951	1.93158	0.859146	0.39026	NA	H2BK1	protein_coding
ENSG00000253483.1	4.61383	1.6585	0.954641	1.7373	0.0823343	NA	ENSG00000253483	processed_pseudogene
ENSG00000253837.1	2.2139	1.65792	1.71399	0.967292	0.333398	NA	ENSG00000253837	lncRNA
ENSG00000171385.10	249.26	1.65614	0.212666	7.78749	6.83518e-15	1.97957e-12	KCND3	protein_coding
ENSG00000242595.1	0.120241	1.65538	5.97418	0.277089	0.781712	NA	RPL26P26	processed_pseudogene
ENSG00000225555.2	5.70866	1.65521	0.994582	1.66423	0.0960674	NA	ENSG00000225555	lncRNA
ENSG00000251513.2	0.882469	1.65447	2.50225	0.661194	0.508488	NA	LIX1-AS1	lncRNA
ENSG00000224017.2	0.119407	1.65431	5.97484	0.27688	0.781872	NA	LINC01449	lncRNA
ENSG00000259398.1	0.727155	1.65331	3.3117	0.499233	0.617615	NA	ENSG00000259398	lncRNA
ENSG00000229798.1	0.159294	1.65331	5.97426	0.276739	0.781981	NA	KRT18P26	processed_pseudogene
ENSG00000248569.1	0.287345	1.65301	5.97427	0.276688	0.78202	NA	ENSG00000248569	processed_pseudogene
ENSG00000242068.1	0.375608	1.65268	5.93298	0.278558	0.780584	NA	ENSG00000242068	processed_pseudogene
ENSG00000267372.2	2.88444	1.6525	1.58299	1.04392	0.296524	NA	ENSG00000267372	lncRNA
ENSG00000196564.4	1.17265	1.6525	1.75222	0.94309	0.345635	NA	BLOC1S6P1	processed_pseudogene
ENSG00000225224.1	0.624626	1.65207	2.6424	0.625214	0.53183	NA	RPS27AP12	processed_pseudogene
ENSG00000259120.3	1.54211	1.65131	1.66002	0.994754	0.319856	NA	SMIM6	protein_coding
ENSG00000238207.2	0.752708	1.65111	3.79036	0.435607	0.663122	NA	ENSG00000238207	lncRNA
ENSG00000266907.1	0.760428	1.65064	2.32809	0.709009	0.478319	NA	ENSG00000266907	processed_pseudogene
ENSG00000246363	1.33971	1.65061	2.42877	0.679609	0.496752	NA	LINC02458	lncRNA
ENSG00000226658.1	0.46198	1.65055	4.0915	0.403409	0.686648	NA	RPL23AP30	processed_pseudogene
ENSG00000261857.7	1.4953	1.65049	2.09957	0.786109	0.431804	NA	MIA	protein_coding
ENSG00000266770.2	0.712329	1.65045	2.25945	0.730465	0.465106	NA	RN7SL619P	misc_RNA
ENSG00000226685.4	0.255707	1.6503	5.93292	0.278159	0.78089	NA	CT47A12	protein_coding
ENSG00000268257.2	0.854496	1.65015	2.57793	0.640108	0.522103	NA	AIRN	lncRNA
ENSG00000267781.1	1.27694	1.64985	1.85697	0.888461	0.374293	NA	SLC25A36P1	processed_pseudogene
ENSG00000269475.2	0.12536	1.64943	5.97441	0.276082	0.782485	NA	ENSG00000269475	unprocessed_pseudogene
ENSG00000146755.11	0.59592	1.64897	3.49827	0.471366	0.637379	NA	TRIM50	protein_coding
ENSG00000248559.1	5.37663	1.64831	0.9639	1.71005	0.0872571	NA	ENSG00000248559	lncRNA
ENSG00000288702.1	0.466489	1.64818	5.97445	0.275871	0.782647	NA	UGT1A3	protein_coding
ENSG00000197308.9	5.62929	1.64781	1.18225	1.39379	0.163382	NA	GATA3-AS1	lncRNA
ENSG00000279772.1	0.198939	1.64737	5.97449	0.275734	0.782752	NA	ENSG00000279772	TEC
ENSG00000184261.5	25.4145	1.64736	0.813954	2.02389	0.0429811	0.211451	KCNK12	protein_coding
ENSG00000251488.1	1.44839	1.64727	1.93984	0.849178	0.395782	NA	ENSG00000251488	lncRNA
ENSG00000235816.3	0.243724	1.64719	5.97449	0.275704	0.782776	NA	PRELID1P3	processed_pseudogene
ENSG00000241785.3	0.123278	1.64657	5.97452	0.275599	0.782856	NA	RN7SL390P	misc_RNA
ENSG00000235145.2	0.613598	1.6465	2.22606	0.739649	0.459513	NA	RPSAP16	processed_pseudogene
ENSG00000278299.6	0.497568	1.64634	5.92255	0.277979	0.781029	NA	TBC1D3C	protein_coding
ENSG00000226957.1	0.787516	1.64618	2.72857	0.603311	0.546302	NA	ENSG00000226957	lncRNA
ENSG00000238199.1	0.839499	1.64561	2.15298	0.764339	0.444665	NA	UBE2V2P3	processed_pseudogene
ENSG00000253825.1	0.206742	1.64523	5.97457	0.275372	0.78303	NA	ENSG00000253825	lncRNA
ENSG00000231421.8	0.413859	1.64522	5.97457	0.27537	0.783032	NA	ENSG00000231421	lncRNA
ENSG00000280703.1	0.16168	1.64518	5.97451	0.275367	0.783034	NA	ENSG00000280703	lncRNA
ENSG00000284677.1	0.512234	1.64509	3.49442	0.470776	0.637801	NA	ENSG00000284677	lncRNA
ENSG00000171872.5	0.406301	1.64508	4.99826	0.32913	0.742058	NA	KLF17	protein_coding
ENSG00000227842.1	0.120657	1.64489	5.97458	0.275316	0.783074	NA	ENSG00000227842	processed_pseudogene
ENSG00000288253.1	0.204217	1.64484	5.97458	0.275306	0.783081	NA	ENSG00000288253	lncRNA
ENSG00000220749.4	0.586175	1.64451	4.64909	0.353726	0.723544	NA	RPL21P28	processed_pseudogene
ENSG00000275227.1	0.196943	1.64447	5.97459	0.275244	0.783129	NA	ENSG00000275227	misc_RNA
ENSG00000286767.1	0.124306	1.64445	5.9746	0.275241	0.783131	NA	ENSG00000286767	lncRNA
ENSG00000232380.1	0.243193	1.64444	5.9746	0.275239	0.783132	NA	ZDHHC20P4	processed_pseudogene
ENSG00000266049.1	0.393638	1.64414	3.52052	0.467015	0.640489	NA	ENSG00000266049	lncRNA
ENSG00000238107.1	0.282482	1.64403	5.36846	0.306239	0.759422	NA	LINC02806	lncRNA
ENSG00000238008.1	0.197098	1.64395	5.97461	0.275156	0.783197	NA	COX6CP10	processed_pseudogene
ENSG00000228330.1	0.501615	1.6438	3.52329	0.466554	0.640819	NA	ENSG00000228330	processed_pseudogene
ENSG00000270755.1	0.412666	1.64363	3.49051	0.470886	0.637722	NA	ENSG00000270755	lncRNA
ENSG00000244349.1	0.430056	1.64362	5.97463	0.2751	0.783239	NA	ENSG00000244349	lncRNA
ENSG00000204010.3	0.210957	1.64354	5.97463	0.275086	0.78325	NA	IFIT1B	protein_coding
ENSG00000166329.3	0.08381	1.64351	5.97463	0.275081	0.783254	NA	CCDC182	protein_coding
ENSG00000204919.1	0.08381	1.64351	5.97463	0.275081	0.783254	NA	PRR20A	protein_coding
ENSG00000225976.5	0.08381	1.64351	5.97463	0.275081	0.783254	NA	CKS1BP2	processed_pseudogene
ENSG00000229213.1	0.08381	1.64351	5.97463	0.275081	0.783254	NA	ENSG00000229213	unprocessed_pseudogene
ENSG00000232702.3	0.08381	1.64351	5.97463	0.275081	0.783254	NA	ENSG00000232702	processed_pseudogene
ENSG00000232998.3	0.08381	1.64351	5.97463	0.275081	0.783254	NA	VPS13A-AS1	lncRNA
ENSG00000236653.3	0.08381	1.64351	5.97463	0.275081	0.783254	NA	LINC01923	lncRNA
ENSG00000253383.1	0.08381	1.64351	5.97463	0.275081	0.783254	NA	ENSG00000253383	processed_pseudogene
ENSG00000256747.1	0.08381	1.64351	5.97463	0.275081	0.783254	NA	ENSG00000256747	lncRNA
ENSG00000257398.8	0.08381	1.64351	5.97463	0.275081	0.783254	NA	ENSG00000257398	lncRNA
ENSG00000258888.1	0.08381	1.64351	5.97463	0.275081	0.783254	NA	ENSG00000258888	lncRNA
ENSG00000264933.2	0.08381	1.64351	5.97463	0.275081	0.783254	NA	RN7SL190P	misc_RNA
ENSG00000265163.1	0.08381	1.64351	5.97463	0.275081	0.783254	NA	CDRT8	lncRNA
ENSG00000268883.2	0.08381	1.64351	5.97463	0.275081	0.783254	NA	PNMA6B	unprocessed_pseudogene
ENSG00000275558.1	0.08381	1.64351	5.97463	0.275081	0.783254	NA	RN7SKP175	misc_RNA
ENSG00000285323.1	0.08381	1.64351	5.97463	0.275081	0.783254	NA	ENSG00000285323	transcribed_unprocessed_pseudogene
ENSG00000286128.1	0.08381	1.64351	5.97463	0.275081	0.783254	NA	ENSG00000286128	lncRNA
ENSG00000286501.1	0.08381	1.64351	5.97463	0.275081	0.783254	NA	ENSG00000286501	lncRNA
ENSG00000287420.1	0.08381	1.64351	5.97463	0.275081	0.783254	NA	ENSG00000287420	lncRNA
ENSG00000231083.1	0.08381	1.64351	5.97463	0.275081	0.783254	NA	ENSG00000231083	lncRNA
ENSG00000236733.1	0.08381	1.64351	5.97463	0.275081	0.783254	NA	ENSG00000236733	lncRNA
ENSG00000236922.10	0.08381	1.64351	5.97463	0.275081	0.783254	NA	LINC01378	lncRNA
ENSG00000267978.6	0.08381	1.64351	5.97463	0.275081	0.783254	NA	MAGEA9B	protein_coding
ENSG00000268074.1	0.08381	1.64351	5.97463	0.275081	0.783254	NA	RPL22P5	processed_pseudogene
ENSG00000286679.1	2.92392	1.64325	1.17719	1.3959	0.162743	NA	ENSG00000286679	lncRNA
ENSG00000269365.2	0.209556	1.64323	5.97464	0.275034	0.78329	NA	ENSG00000269365	lncRNA
ENSG00000270806.2	0.362075	1.64318	3.70353	0.443679	0.657275	NA	C17orf50	protein_coding
ENSG00000236544.1	0.635699	1.64296	3.4447	0.476954	0.633395	NA	EN2-DT	lncRNA
ENSG00000224546.2	1.26706	1.64286	1.88942	0.869502	0.384573	NA	EIF4BP3	processed_pseudogene
ENSG00000169676.6	0.743465	1.64277	2.47229	0.664474	0.506387	NA	DRD5	protein_coding
ENSG00000239797.1	0.450777	1.64275	4.99673	0.328764	0.742334	NA	RPL21P39	processed_pseudogene
ENSG00000224535.2	0.125692	1.64252	5.97467	0.274913	0.783383	NA	LINC02771	lncRNA
ENSG00000255346.10	2.3872	1.6425	2.01126	0.816652	0.414127	NA	NOX5	protein_coding
ENSG00000255079.1	0.70993	1.64247	2.09425	0.784275	0.432879	NA	LINC02704	lncRNA
ENSG00000277837.1	0.408876	1.6423	5.06293	0.324378	0.745652	NA	ENSG00000277837	lncRNA
ENSG00000287296.1	0.167634	1.64229	5.97468	0.274875	0.783413	NA	ENSG00000287296	lncRNA
ENSG00000224814.1	0.167634	1.64227	5.97468	0.274872	0.783414	NA	ENSG00000224814	lncRNA
ENSG00000255692.1	0.689005	1.64197	2.26763	0.724091	0.46901	NA	ENSG00000255692	lncRNA
ENSG00000247911.3	0.35742	1.64169	5.11311	0.321075	0.748153	NA	HMGN1P12	processed_pseudogene
ENSG00000127903.14	0.449342	1.64116	4.22473	0.388465	0.697672	NA	ZNF835	protein_coding
ENSG00000264007.1	1.26725	1.64085	1.66774	0.983879	0.325175	NA	ENSG00000264007	lncRNA
ENSG00000198734.12	2.00086	1.64079	1.69627	0.967297	0.333396	NA	F5	protein_coding
ENSG00000267857.2	0.164915	1.64059	5.97529	0.274563	0.783652	NA	ENSG00000267857	lncRNA
ENSG00000232467.2	0.128534	1.6403	5.97475	0.274538	0.783671	NA	TMA16P2	processed_pseudogene
ENSG00000225043.1	0.361019	1.64028	5.15571	0.318149	0.750372	NA	RPL18AP2	processed_pseudogene
ENSG00000271398.1	0.168326	1.64028	5.97475	0.274535	0.783673	NA	ENSG00000271398	lncRNA
ENSG00000267693.1	0.167119	1.63959	5.97478	0.274419	0.783763	NA	ENSG00000267693	processed_pseudogene
ENSG00000286622.1	1.59139	1.63951	1.72682	0.949434	0.3424	NA	ENSG00000286622	lncRNA
ENSG00000264012.1	0.376779	1.63948	4.165	0.393632	0.693853	NA	ENSG00000264012	lncRNA
ENSG00000258072.1	4.20412	1.63944	1.76628	0.92819	0.353309	NA	ENSG00000258072	processed_pseudogene
ENSG00000251286.2	0.257797	1.63936	5.97479	0.27438	0.783793	NA	ENSG00000251286	processed_pseudogene
ENSG00000101222.12	7.09986	1.6393	0.779627	2.10267	0.0354943	0.186174	SPEF1	protein_coding
ENSG00000181693	0.12165	1.63925	5.97479	0.27436	0.783808	NA	OR8H1	protein_coding
ENSG00000234751.1	0.384013	1.63922	5.10985	0.320796	0.748365	NA	ENSG00000234751	processed_pseudogene
ENSG00000206356.5	0.87909	1.63886	2.15184	0.761608	0.446294	NA	ENSG00000206356	processed_pseudogene
ENSG00000266965.1	0.600362	1.63882	3.54058	0.462867	0.64346	NA	ENSG00000266965	lncRNA
ENSG00000270915.1	0.376257	1.63878	5.10522	0.321002	0.748209	NA	H3P8	processed_pseudogene
ENSG00000273696	0.387643	1.63851	5.06573	0.32345	0.746355	NA	CT45A7	protein_coding
ENSG00000271980.1	2.42584	1.63848	1.19722	1.36857	0.171133	NA	ENSG00000271980	lncRNA
ENSG00000120937.9	0.661559	1.63848	3.96302	0.413442	0.679283	NA	NPPB	protein_coding
ENSG00000214465.3	0.478385	1.63839	3.55159	0.461313	0.644574	NA	SMARCE1P6	processed_pseudogene
ENSG00000225215.1	0.2828	1.6382	5.97483	0.274184	0.783943	NA	SMARCE1P1	processed_pseudogene
ENSG00000101448.14	1.4854	1.63806	1.75855	0.931481	0.351605	NA	EPPIN	protein_coding
ENSG00000259228.1	0.126874	1.63798	5.97484	0.274147	0.783972	NA	HNRNPA1P62	processed_pseudogene
ENSG00000277608.1	0.125582	1.63781	5.97485	0.274117	0.783995	NA	ENSG00000277608	unprocessed_pseudogene
ENSG00000248648.1	1.39994	1.63781	1.49312	1.0969	0.272684	NA	ENSG00000248648	processed_pseudogene
ENSG00000280148.1	0.5309	1.63775	3.65197	0.448456	0.653824	NA	ENSG00000280148	protein_coding
ENSG00000265261.1	0.581755	1.63764	2.60273	0.629201	0.529218	NA	ENSG00000265261	processed_pseudogene
ENSG00000282413.1	0.435281	1.63741	5.97486	0.27405	0.784046	NA	ENSG00000282413	processed_pseudogene
ENSG00000278370.1	0.24308	1.63728	5.97535	0.274006	0.78408	NA	ENSG00000278370	lncRNA
ENSG00000233107.1	0.349805	1.63715	5.97535	0.273984	0.784097	NA	SUCLA2P2	processed_pseudogene
ENSG00000287274.1	0.297612	1.63703	5.9334	0.275901	0.782624	NA	ENSG00000287274	lncRNA
ENSG00000254447.3	1.15415	1.63694	2.09622	0.780904	0.434859	NA	ENSG00000254447	lncRNA
ENSG00000224691.1	0.165985	1.63683	5.97489	0.273952	0.784122	NA	ENSG00000224691	lncRNA
ENSG00000248988.1	0.60014	1.63678	4.03771	0.405373	0.685203	NA	PSME2P3	processed_pseudogene
ENSG00000274547.1	1.58401	1.63669	2.8277	0.578804	0.562721	NA	ENSG00000274547	misc_RNA
ENSG00000274591.1	0.533315	1.63651	3.01894	0.542081	0.587762	NA	ENSG00000274591	lncRNA
ENSG00000230965.1	0.576322	1.63631	2.80976	0.582366	0.56032	NA	SNX18P13	processed_pseudogene
ENSG00000259005.1	1.87246	1.63625	1.71267	0.955379	0.339386	NA	ENSG00000259005	lncRNA
ENSG00000258082	0.49855	1.63624	4.0922	0.399843	0.689273	NA	ENSG00000258082	lncRNA
ENSG00000219392	1.917	1.636	1.60422	1.01981	0.30782	NA	ZNF602P	transcribed_unprocessed_pseudogene
ENSG00000277870.5	1.12919	1.63592	1.77856	0.919801	0.357677	NA	FAM230A	lncRNA
ENSG00000205882	0.874646	1.63581	2.81951	0.580174	0.561797	NA	DEFB134	protein_coding
ENSG00000198156	10.9296	1.63475	1.30658	1.25117	0.210874	0.532072	NPIPB6	protein_coding
ENSG00000251434.1	0.559218	1.63451	3.16032	0.517196	0.605019	NA	ENSG00000251434	lncRNA
ENSG00000275896	3.40198	1.63442	1.06535	1.53416	0.124989	NA	PRSS2	protein_coding
ENSG00000226761.3	1.93878	1.63441	1.74411	0.937103	0.348706	NA	TAS2R46	protein_coding
ENSG00000213432.2	0.12414	1.63433	5.9756	0.2735	0.784469	NA	RPL17P34	processed_pseudogene
ENSG00000279033.1	0.49455	1.63415	5.97499	0.273499	0.78447	NA	ENSG00000279033	TEC
ENSG00000267104.2	0.994352	1.63406	2.06436	0.791559	0.428618	NA	TBC1D3P1-DHX40P1	lncRNA
ENSG00000259788.1	0.405594	1.63401	3.64511	0.448273	0.653956	NA	UAP1-DT	lncRNA
ENSG00000265751.1	0.234108	1.63391	5.975	0.273458	0.784501	NA	ENSG00000265751	lncRNA
ENSG00000279086.1	0.746806	1.63369	2.71875	0.600899	0.547907	NA	ENSG00000279086	TEC
ENSG00000217041.1	0.162741	1.63352	5.97501	0.273392	0.784552	NA	ENSG00000217041	processed_pseudogene
ENSG00000253357.1	0.45938	1.63351	4.85967	0.336136	0.736768	NA	ENSG00000253357	lncRNA
ENSG00000253931.1	2.27747	1.63335	1.91326	0.853699	0.393272	NA	LINC02990	lncRNA
ENSG00000254418.1	0.478537	1.63325	3.52522	0.463305	0.643146	NA	SPON1-AS1	lncRNA
ENSG00000257568.1	0.281433	1.63315	5.37352	0.303926	0.761184	NA	ENSG00000257568	lncRNA
ENSG00000280295.1	1.13457	1.63313	1.9672	0.830183	0.406435	NA	ENSG00000280295	TEC
ENSG00000264448.5	0.753402	1.63287	2.5325	0.644766	0.519079	NA	MIR378D2HG	lncRNA
ENSG00000271511.1	0.364807	1.63278	5.13419	0.318021	0.750469	NA	ENSG00000271511	processed_pseudogene
ENSG00000223704.2	6.65162	1.63267	0.938303	1.74002	0.0818553	0.315247	LINC01422	lncRNA
ENSG00000237410.1	1.61309	1.63245	1.71359	0.952648	0.340768	NA	NRXN2-AS1	lncRNA
ENSG00000286562.1	0.498553	1.63188	4.16514	0.391794	0.69521	NA	ENSG00000286562	lncRNA
ENSG00000242795.2	0.509389	1.63153	3.45321	0.472467	0.636594	NA	ENSG00000242795	lncRNA
ENSG00000279166.1	1.44804	1.63094	1.81095	0.900602	0.3678	NA	ENSG00000279166	TEC
ENSG00000218631.1	0.204515	1.63041	5.97547	0.27285	0.784968	NA	ENSG00000218631	processed_pseudogene
ENSG00000250536.1	0.340148	1.63039	5.97513	0.272862	0.784959	NA	ABHD17AP3	unprocessed_pseudogene
ENSG00000274813.1	0.199919	1.63035	5.97548	0.27284	0.784976	NA	ENSG00000274813	unprocessed_pseudogene
ENSG00000276002.1	0.210652	1.63033	5.97548	0.272837	0.784979	NA	Metazoa_SRP	misc_RNA
ENSG00000269487.1	0.717656	1.63007	2.55017	0.639201	0.522692	NA	ENSG00000269487	lncRNA
ENSG00000240723.3	0.164899	1.63007	5.97548	0.272792	0.785013	NA	RN7SL382P	misc_RNA
ENSG00000260509.2	0.577203	1.6297	2.88709	0.564478	0.572429	NA	ENSG00000260509	lncRNA
ENSG00000273821.1	1.55037	1.62966	1.70229	0.957334	0.338399	NA	ENSG00000273821	lncRNA
ENSG00000260844.2	0.493289	1.62959	3.45798	0.471256	0.637458	NA	ENSG00000260844	processed_pseudogene
ENSG00000177736.4	0.938835	1.62958	2.13809	0.762165	0.445961	NA	FXNP2	processed_pseudogene
ENSG00000238038.1	0.206196	1.62958	5.97578	0.272697	0.785086	NA	ATP6V0E1P3	processed_pseudogene
ENSG00000237200.1	0.589506	1.62956	2.76628	0.589078	0.555809	NA	ZBTB40-IT1	lncRNA
ENSG00000213763.4	1.09661	1.62936	1.83971	0.885658	0.375802	NA	ACTBP2	processed_pseudogene
ENSG00000227525.4	0.504387	1.62851	2.66086	0.612024	0.540522	NA	RPL7P6	processed_pseudogene
ENSG00000257198.6	0.513125	1.62827	5.89912	0.276019	0.782533	NA	FAM205BP	transcribed_unprocessed_pseudogene
ENSG00000219355.2	0.333482	1.62822	5.17262	0.314777	0.752931	NA	RPL31P52	processed_pseudogene
ENSG00000285945.1	0.119704	1.62817	5.97552	0.272473	0.785258	NA	ENSG00000285945	lncRNA
ENSG00000254941.1	0.288371	1.62812	5.97584	0.272451	0.785275	NA	ENSG00000254941	processed_pseudogene
ENSG00000276290.1	0.124815	1.62807	5.97552	0.272457	0.785271	NA	RBBP4P3	processed_pseudogene
ENSG00000158553.5	0.372081	1.62804	4.21004	0.386703	0.698976	NA	POM121L2	protein_coding
ENSG00000229325.1	4.47851	1.62803	1.1822	1.37712	0.168475	NA	ACAP2-IT1	lncRNA
ENSG00000248455	0.416659	1.62797	5.96692	0.272833	0.784982	NA	LINC02217	lncRNA
ENSG00000232150.3	0.599899	1.6279	2.71249	0.60015	0.548406	NA	ST13P4	processed_pseudogene
ENSG00000241612.1	0.166175	1.62788	5.97552	0.272424	0.785296	NA	ENSG00000241612	processed_pseudogene
ENSG00000266980.1	2.06555	1.6278	1.57574	1.03304	0.301588	NA	ENSG00000266980	lncRNA
ENSG00000278385.1	0.204853	1.62765	5.97552	0.272387	0.785325	NA	ENSG00000278385	lncRNA
ENSG00000237928.6	0.799242	1.62754	2.0709	0.785907	0.431922	NA	NFIA-AS2	lncRNA
ENSG00000260310.1	0.32592	1.62738	5.12701	0.317413	0.75093	NA	ENSG00000260310	lncRNA
ENSG00000231762.1	2.10263	1.62736	1.41466	1.15036	0.249997	NA	ENSG00000231762	processed_pseudogene
ENSG00000272911.1	0.351398	1.62733	5.15425	0.315725	0.752211	NA	ENSG00000272911	lncRNA
ENSG00000223593.1	0.121546	1.62728	5.97587	0.272308	0.785385	NA	ENSG00000223593	processed_pseudogene
ENSG00000243979.2	0.365503	1.62717	4.13145	0.393849	0.693692	NA	ENSG00000243979	processed_pseudogene
ENSG00000287762.1	0.943043	1.62707	2.18832	0.743523	0.457165	NA	ENSG00000287762	lncRNA
ENSG00000235363.1	0.918825	1.62702	2.48451	0.654866	0.512554	NA	SNRPGP10	processed_pseudogene
ENSG00000280283.1	0.487676	1.62698	3.60321	0.451536	0.651604	NA	ENSG00000280283	TEC
ENSG00000237548	0.966864	1.6269	2.16233	0.752382	0.451821	NA	NA	NA
ENSG00000230370.1	0.15658	1.62634	5.97555	0.272166	0.785494	NA	RPL23AP52	processed_pseudogene
ENSG00000231964.1	0.287022	1.62628	5.97529	0.272168	0.785493	NA	ENSG00000231964	lncRNA
ENSG00000279176.1	0.385118	1.62623	3.64271	0.446436	0.655283	NA	ENSG00000279176	TEC
ENSG00000226649.1	0.119669	1.62613	5.97555	0.27213	0.785522	NA	ENSG00000226649	lncRNA
ENSG00000219298.1	0.292627	1.62604	5.9753	0.272127	0.785524	NA	ENSG00000219298	processed_pseudogene
ENSG00000287666.1	0.691952	1.62604	2.3518	0.691401	0.489313	NA	ENSG00000287666	lncRNA
ENSG00000255815.3	0.530964	1.62601	4.90644	0.331403	0.74034	NA	KRT8P11	processed_pseudogene
ENSG00000272103.2	2.90098	1.62592	1.37994	1.17825	0.238696	NA	ENSG00000272103	lncRNA
ENSG00000138061.12	275.731	1.62585	0.263435	6.17175	6.75369e-10	7.10269e-08	CYP1B1	protein_coding
ENSG00000246422.2	0.489423	1.6251	3.18175	0.510756	0.609522	NA	DIAPH1-AS1	lncRNA
ENSG00000266891.1	0.377729	1.62503	5.05996	0.321154	0.748094	NA	ENSG00000266891	processed_pseudogene
ENSG00000258170.1	0.416858	1.6247	3.63979	0.446373	0.655328	NA	ENSG00000258170	lncRNA
ENSG00000229190.1	0.430125	1.62451	3.48592	0.466021	0.6412	NA	ENSG00000229190	lncRNA
ENSG00000256452.1	0.121458	1.62449	5.97598	0.271837	0.785747	NA	ENSG00000256452	lncRNA
ENSG00000286947.1	0.37173	1.62426	4.31986	0.375999	0.706918	NA	ENSG00000286947	lncRNA
ENSG00000238110.1	0.400467	1.62416	3.17088	0.51221	0.608504	NA	ENSG00000238110	processed_pseudogene
ENSG00000279357.1	0.66625	1.62403	2.68694	0.604416	0.545567	NA	ENSG00000279357	TEC
ENSG00000283360.1	0.24015	1.62393	5.5419	0.293028	0.7695	NA	ENSG00000283360	lncRNA
ENSG00000274833.1	0.878548	1.62393	2.46312	0.659297	0.509705	NA	ENSG00000274833	lncRNA
ENSG00000274156.1	1.45943	1.62386	1.9888	0.816503	0.414213	NA	ENSG00000274156	lncRNA
ENSG00000273384.1	0.803401	1.62376	1.99254	0.814921	0.415117	NA	ENSG00000273384	lncRNA
ENSG00000274717.1	0.60851	1.62373	2.55394	0.635773	0.524924	NA	ENSG00000274717	processed_pseudogene
ENSG00000196289.7	0.251634	1.62353	5.9756	0.271693	0.785858	NA	BECN2	protein_coding
ENSG00000220130.1	0.241242	1.62347	5.9754	0.271693	0.785858	NA	ENSG00000220130	processed_pseudogene
ENSG00000225527.1	2.42869	1.62346	1.16205	1.39707	0.162392	NA	ENSG00000225527	lncRNA
ENSG00000276568.1	0.523028	1.623	3.14379	0.516256	0.605676	NA	Metazoa_SRP	misc_RNA
ENSG00000242602.1	0.620426	1.62297	3.50513	0.463027	0.643345	NA	RPL35AP13	processed_pseudogene
ENSG00000148671.14	0.171541	1.62262	5.97562	0.271541	0.785975	NA	ADIRF	protein_coding
ENSG00000231530.1	1.8849	1.62241	1.315	1.23377	0.217288	NA	ENSG00000231530	lncRNA
ENSG00000251775.1	0.712494	1.62234	2.44605	0.663249	0.507171	NA	ENSG00000251775	snoRNA
ENSG00000135625.8	1.37546	1.62225	2.19951	0.73755	0.460788	NA	EGR4	protein_coding
ENSG00000241868.3	0.320187	1.62223	5.97562	0.271474	0.786026	NA	RN7SL434P	misc_RNA
ENSG00000232798.1	0.541671	1.62207	5.8626	0.276681	0.782025	NA	ENSG00000232798	processed_pseudogene
ENSG00000287754.1	0.208008	1.62203	5.93386	0.273352	0.784583	NA	ENSG00000287754	lncRNA
ENSG00000137270.11	0.491385	1.62175	2.58969	0.626234	0.531161	NA	GCM1	protein_coding
ENSG00000279928.2	0.168653	1.62142	5.9761	0.271317	0.786147	NA	DDX11L17	unprocessed_pseudogene
ENSG00000258741	8.66115	1.62136	1.31054	1.23717	0.216024	0.538916	H2AZ2P1	transcribed_processed_pseudogene
ENSG00000276110.1	0.643643	1.62084	3.09336	0.523974	0.600296	NA	ENSG00000276110	lncRNA
ENSG00000188959.10	0.938707	1.62075	2.48924	0.651103	0.51498	NA	C9orf152	protein_coding
ENSG00000271662.1	5.20431	1.62075	0.869705	1.86356	0.0623837	NA	ENSG00000271662	processed_pseudogene
ENSG00000249341.1	0.167541	1.62048	5.97566	0.27118	0.786253	NA	ENSG00000249341	lncRNA
ENSG00000272361.2	1.14662	1.62034	1.84022	0.880512	0.378582	NA	ENSG00000272361	lncRNA
ENSG00000264520.1	0.726505	1.62031	2.5049	0.646854	0.517727	NA	ENSG00000264520	lncRNA
ENSG00000228135.1	0.118248	1.62024	5.97615	0.271118	0.7863	NA	LINC01494	lncRNA
ENSG00000232352	2.59539	1.6202	1.21137	1.3375	0.18106	NA	SEMA3B-AS1	lncRNA
ENSG00000267827.5	1.00773	1.62005	3.13321	0.517058	0.605116	NA	ENSG00000267827	lncRNA
ENSG00000235262.1	2.40054	1.61992	1.14217	1.41828	0.156108	NA	KDM5C-IT1	lncRNA
ENSG00000273444.1	0.203329	1.61991	5.97616	0.271063	0.786343	NA	ENSG00000273444	unprocessed_pseudogene
ENSG00000228157.4	1.31104	1.61964	1.82498	0.887484	0.374819	NA	ENSG00000228157	lncRNA
ENSG00000236440.1	0.587228	1.6195	2.95647	0.547782	0.583841	NA	COPRSP1	processed_pseudogene
ENSG00000143839.15	1.00845	1.61927	2.57128	0.62975	0.528858	NA	REN	protein_coding
ENSG00000236878.1	0.581301	1.61885	2.55941	0.63251	0.527053	NA	MTATP6P26	processed_pseudogene
ENSG00000078549.15	283.048	1.61883	0.652958	2.47923	0.0131668	0.0965579	ADCYAP1R1	protein_coding
ENSG00000177464.5	4.72817	1.61881	1.57086	1.03053	0.302763	NA	GPR4	protein_coding
ENSG00000231087.2	1.45597	1.61872	1.92329	0.841644	0.399987	NA	FDPSP7	processed_pseudogene
ENSG00000272180.1	1.51573	1.61868	2.06773	0.782831	0.433726	NA	ENSG00000272180	lncRNA
ENSG00000092850.12	0.487802	1.61863	4.09894	0.39489	0.692924	NA	TEKT2	protein_coding
ENSG00000240487.1	0.206572	1.61844	5.97622	0.270813	0.786535	NA	FAM214BP1	processed_pseudogene
ENSG00000276107.1	0.567088	1.61829	3.95448	0.40923	0.682371	NA	THBS1-IT1	lncRNA
ENSG00000231386.1	0.788964	1.6182	2.93584	0.551187	0.581506	NA	MOB4P1	processed_pseudogene
ENSG00000287463.1	0.982585	1.61785	2.20192	0.734743	0.462496	NA	ENSG00000287463	lncRNA
ENSG00000271142.1	0.162176	1.61781	5.97571	0.270731	0.786598	NA	YWHAQP7	processed_pseudogene
ENSG00000175535.6	0.56084	1.6176	3.94764	0.409764	0.681979	NA	PNLIP	protein_coding
ENSG00000284671.1	0.854848	1.61721	2.22568	0.726614	0.467462	NA	ENSG00000284671	transcribed_unprocessed_pseudogene
ENSG00000160396.9	1.25981	1.61705	1.98251	0.815656	0.414697	NA	HIPK4	protein_coding
ENSG00000260156.1	0.362477	1.61689	4.31134	0.375031	0.707637	NA	ENSG00000260156	lncRNA
ENSG00000254892.1	0.42723	1.61679	5.03961	0.320817	0.748349	NA	ENSG00000254892	processed_pseudogene
ENSG00000287185.1	0.743165	1.61664	2.22641	0.726121	0.467765	NA	ENSG00000287185	lncRNA
ENSG00000236459.1	0.162772	1.61653	5.97573	0.270516	0.786763	NA	HNRNPA1P22	processed_pseudogene
ENSG00000227081.5	0.845084	1.61626	2.19931	0.734893	0.462405	NA	ENSG00000227081	processed_pseudogene
ENSG00000272170.1	1.04436	1.61625	2.30167	0.702209	0.482549	NA	KLC4-AS1	lncRNA
ENSG00000181023.8	0.19006	1.61624	5.9763	0.270441	0.786821	NA	OR56B1	protein_coding
ENSG00000287804	0.295645	1.61594	5.97631	0.270391	0.786859	NA	ENSG00000287804	lncRNA
ENSG00000286802.1	0.284811	1.61567	5.36227	0.301303	0.763184	NA	ENSG00000286802	lncRNA
ENSG00000149635.3	0.123413	1.61549	5.97633	0.270314	0.786919	NA	OCSTAMP	protein_coding
ENSG00000288026.1	0.118086	1.61541	5.97633	0.270301	0.786929	NA	ENSG00000288026	lncRNA
ENSG00000266803.1	0.28215	1.61522	5.36575	0.301024	0.763396	NA	ENSG00000266803	lncRNA
ENSG00000265093.2	0.374179	1.61521	5.14054	0.314211	0.753361	NA	RN7SL246P	misc_RNA
ENSG00000270926.1	0.118074	1.61505	5.97635	0.27024	0.786975	NA	ENSG00000270926	unprocessed_pseudogene
ENSG00000273958.1	0.642459	1.61489	3.02047	0.534648	0.592893	NA	ENSG00000273958	lncRNA
ENSG00000189325.7	0.364909	1.61451	4.28508	0.376775	0.706341	NA	BNIP5	protein_coding
ENSG00000250444.1	0.118035	1.61443	5.97637	0.270135	0.787056	NA	CCT5P1	processed_pseudogene
ENSG00000225195.2	0.366253	1.6143	5.11477	0.315616	0.752294	NA	ENSG00000225195	lncRNA
ENSG00000272905.1	0.482768	1.61424	3.55757	0.453749	0.650009	NA	ENSG00000272905	lncRNA
ENSG00000175065.12	0.196763	1.61422	5.97638	0.270101	0.787083	NA	DSG4	protein_coding
ENSG00000268864.4	0.243274	1.61419	5.97638	0.270095	0.787087	NA	ENSG00000268864	transcribed_unprocessed_pseudogene
ENSG00000218186.2	0.233731	1.61415	5.97638	0.270088	0.787093	NA	KRT8P43	processed_pseudogene
ENSG00000226604.2	0.118806	1.61411	5.97638	0.270082	0.787097	NA	PAPPA-AS2	lncRNA
ENSG00000286391	0.65686	1.61406	2.74666	0.587644	0.556771	NA	ENSG00000286391	lncRNA
ENSG00000275212.3	0.343382	1.6139	5.19589	0.310611	0.756096	NA	LINC02826	lncRNA
ENSG00000260268.6	0.227599	1.6139	5.97753	0.269994	0.787165	NA	LINC00919	lncRNA
ENSG00000258707.2	1.9052	1.6139	1.38173	1.16803	0.242796	NA	ENSG00000258707	processed_pseudogene
ENSG00000241490.1	2.73064	1.61387	1.55436	1.03829	0.299137	NA	ENSG00000241490	lncRNA
ENSG00000230646.1	0.244232	1.61384	5.97639	0.270036	0.787132	NA	KLF2P2	processed_pseudogene
ENSG00000159166.15	0.0819941	1.61374	5.9764	0.270019	0.787146	NA	LAD1	protein_coding
ENSG00000213075.7	0.0819941	1.61374	5.9764	0.270019	0.787146	NA	RPL31P11	transcribed_processed_pseudogene
ENSG00000223656.1	0.0819941	1.61374	5.9764	0.270019	0.787146	NA	HMGB3P10	processed_pseudogene
ENSG00000225678.2	0.0819941	1.61374	5.9764	0.270019	0.787146	NA	ENSG00000225678	transcribed_unprocessed_pseudogene
ENSG00000227836.1	0.0819941	1.61374	5.9764	0.270019	0.787146	NA	ENSG00000227836	processed_pseudogene
ENSG00000232174.3	0.0819941	1.61374	5.9764	0.270019	0.787146	NA	ENSG00000232174	processed_pseudogene
ENSG00000233304.7	0.0819941	1.61374	5.9764	0.270019	0.787146	NA	LINC01346	lncRNA
ENSG00000236327.2	0.0819941	1.61374	5.9764	0.270019	0.787146	NA	ENSG00000236327	processed_pseudogene
ENSG00000249236.2	0.0819941	1.61374	5.9764	0.270019	0.787146	NA	ENSG00000249236	lncRNA
ENSG00000254665.1	0.0819941	1.61374	5.9764	0.270019	0.787146	NA	ENSG00000254665	lncRNA
ENSG00000259945.1	0.0819941	1.61374	5.9764	0.270019	0.787146	NA	ENSG00000259945	lncRNA
ENSG00000270555.1	0.0819941	1.61374	5.9764	0.270019	0.787146	NA	ENSG00000270555	processed_pseudogene
ENSG00000287473.1	0.0819941	1.61374	5.9764	0.270019	0.787146	NA	ENSG00000287473	lncRNA
ENSG00000287782.1	0.0819941	1.61374	5.9764	0.270019	0.787146	NA	ENSG00000287782	lncRNA
ENSG00000112116	0.0819941	1.61374	5.9764	0.270019	0.787146	NA	IL17F	protein_coding
ENSG00000185177.14	0.0819941	1.61374	5.9764	0.270019	0.787146	NA	ZNF479	protein_coding
ENSG00000261466.2	1.26603	1.61367	1.74502	0.92473	0.355107	NA	ENSG00000261466	lncRNA
ENSG00000270000.1	0.856676	1.61354	2.39722	0.67309	0.50089	NA	ENSG00000270000	lncRNA
ENSG00000226632.1	1.0821	1.61349	1.77518	0.908917	0.363394	NA	UBE2V1P1	processed_pseudogene
ENSG00000286957.1	0.980023	1.61339	2.98305	0.540854	0.588608	NA	ENSG00000286957	lncRNA
ENSG00000163286.9	0.604674	1.61302	3.05858	0.527374	0.597934	NA	ALPG	protein_coding
ENSG00000256577.2	0.643802	1.61289	2.77802	0.580587	0.561519	NA	SLC6A12-AS1	lncRNA
ENSG00000161610.1	0.159519	1.61288	5.97693	0.26985	0.787275	NA	HCRT	protein_coding
ENSG00000241537.1	0.864479	1.61284	2.46396	0.654573	0.512743	NA	ENSG00000241537	processed_pseudogene
ENSG00000225193.5	0.521623	1.61273	2.49938	0.645253	0.518764	NA	RPS12P26	transcribed_processed_pseudogene
ENSG00000286078.1	0.396944	1.61271	5.97644	0.269845	0.787279	NA	ENSG00000286078	lncRNA
ENSG00000250714.3	0.30636	1.6126	5.97644	0.269826	0.787294	NA	TNFRSF10A-DT	lncRNA
ENSG00000237401.8	0.700087	1.61254	3.2183	0.501052	0.616335	NA	LINC01304	lncRNA
ENSG00000279334.1	0.772248	1.61245	2.92753	0.55079	0.581778	NA	ENSG00000279334	TEC
ENSG00000233821.1	0.380606	1.61226	5.97646	0.269769	0.787338	NA	ENOX1-AS1	lncRNA
ENSG00000285748.2	0.298596	1.61218	5.97646	0.269756	0.787348	NA	ENSG00000285748	lncRNA
ENSG00000271996.1	0.568105	1.61189	2.6969	0.59768	0.550053	NA	ENSG00000271996	lncRNA
ENSG00000100156	16.3704	1.61183	0.865798	1.86167	0.0626497	0.268224	SLC16A8	protein_coding
ENSG00000169618.7	24.5407	1.6114	1.68014	0.959083	0.337517	0.667746	PROKR1	protein_coding
ENSG00000213872.3	0.36957	1.61137	3.19971	0.503599	0.614543	NA	RPL32P11	processed_pseudogene
ENSG00000273474.1	0.529776	1.61126	3.56888	0.451474	0.651648	NA	ENSG00000273474	lncRNA
ENSG00000287405.1	4.19694	1.61115	1.26523	1.2734	0.202876	NA	ENSG00000287405	lncRNA
ENSG00000230898.1	0.384253	1.61114	4.235	0.380436	0.703622	NA	ENSG00000230898	lncRNA
ENSG00000178248.11	0.240309	1.61041	5.97653	0.269456	0.787578	NA	FAM230I	lncRNA
ENSG00000196335.13	10.2731	1.61022	1.40852	1.1432	0.252954	0.58121	STK31	protein_coding
ENSG00000278455.1	0.237445	1.60999	5.97654	0.269385	0.787633	NA	CICP21	processed_pseudogene
ENSG00000230495.1	0.30484	1.6098	5.97655	0.269353	0.787658	NA	ENSG00000230495	processed_pseudogene
ENSG00000276807.1	0.416028	1.60962	4.24914	0.378811	0.704829	NA	ENSG00000276807	lncRNA
ENSG00000270665.1	0.206546	1.60939	5.97657	0.269284	0.787711	NA	HNRNPA1P67	processed_pseudogene
ENSG00000224315.2	0.773354	1.60901	2.29465	0.701204	0.483176	NA	RPL7P7	processed_pseudogene
ENSG00000251632.1	0.31571	1.60891	5.93431	0.27112	0.786299	NA	LINC02172	lncRNA
ENSG00000227929.4	0.450562	1.60888	4.77001	0.337291	0.735898	NA	SRGAP3-AS3	lncRNA
ENSG00000231426.7	0.315439	1.60834	5.13502	0.313211	0.754121	NA	FILNC1	lncRNA
ENSG00000202512.1	0.201934	1.60833	5.97588	0.269137	0.787824	NA	RN7SKP230	misc_RNA
ENSG00000276100.1	0.117852	1.60832	5.97661	0.269102	0.787851	NA	ENSG00000276100	misc_RNA
ENSG00000214415.4	2.01392	1.6081	1.97353	0.814837	0.415166	NA	GNAT3	protein_coding
ENSG00000239524.2	0.938796	1.60806	2.08495	0.771271	0.440547	NA	RPL32P34	processed_pseudogene
ENSG00000272861.1	1.20962	1.60756	1.8582	0.865117	0.386975	NA	ENSG00000272861	lncRNA
ENSG00000169851	238.754	1.60691	0.315777	5.08876	3.60412e-07	1.82386e-05	PCDH7	protein_coding
ENSG00000260954.1	0.493759	1.60667	3.58495	0.448171	0.65403	NA	ENSG00000260954	lncRNA
ENSG00000169840.5	14.15	1.60664	1.79118	0.896971	0.369735	0.69728	GSX1	protein_coding
ENSG00000250769.2	0.681819	1.6066	3.11557	0.515669	0.606085	NA	ENSG00000250769	processed_pseudogene
ENSG00000261655.1	3.33789	1.60651	1.76944	0.907922	0.363919	NA	ENSG00000261655	lncRNA
ENSG00000213236.3	0.231772	1.60649	5.97705	0.268776	0.788102	NA	YWHAZP2	processed_pseudogene
ENSG00000229001.1	0.12368	1.60642	5.97669	0.268782	0.788098	NA	ACTBP14	processed_pseudogene
ENSG00000172969.8	0.563269	1.60625	3.54841	0.452667	0.650788	NA	FRG2C	protein_coding
ENSG00000286319.1	0.501441	1.60614	4.71273	0.340809	0.733247	NA	ENSG00000286319	lncRNA
ENSG00000242882.1	0.359637	1.60589	3.651	0.43985	0.660046	NA	RPL5P11	processed_pseudogene
ENSG00000228014.1	0.161752	1.60586	5.97707	0.268671	0.788183	NA	ZNF680P1	processed_pseudogene
ENSG00000120329.7	0.233804	1.60583	5.57823	0.287874	0.773443	NA	SLC25A2	protein_coding
ENSG00000223519.8	2.54638	1.60578	1.73965	0.923046	0.355983	NA	KIF28P	transcribed_unitary_pseudogene
ENSG00000259732.1	1.49684	1.60569	2.01087	0.798505	0.424577	NA	ENSG00000259732	lncRNA
ENSG00000166159.11	0.244554	1.60465	5.97792	0.26843	0.788368	NA	LRTM2	protein_coding
ENSG00000234009.1	0.329303	1.60458	5.22083	0.307342	0.758583	NA	RPL5P34	processed_pseudogene
ENSG00000229133.1	0.163366	1.60446	5.97676	0.268449	0.788354	NA	RPS7P4	processed_pseudogene
ENSG00000227050.1	0.410358	1.60399	5.97678	0.268371	0.788414	NA	ENSG00000227050	lncRNA
ENSG00000220184.2	1.21264	1.60394	2.08343	0.769854	0.441387	NA	HMGB3P18	processed_pseudogene
ENSG00000274750.3	3.0582	1.60373	1.36818	1.17217	0.24113	NA	H3C6	protein_coding
ENSG00000153237.18	6.21416	1.60353	1.05424	1.52104	0.128251	NA	CCDC148	protein_coding
ENSG00000259161.2	0.124525	1.60352	5.9768	0.26829	0.788476	NA	NPM1P20	processed_pseudogene
ENSG00000267760.1	0.527267	1.60295	3.18704	0.502959	0.614993	NA	ENSG00000267760	lncRNA
ENSG00000287403.1	0.804046	1.60255	2.43608	0.657841	0.51064	NA	ENSG00000287403	lncRNA
ENSG00000230188.1	1.33943	1.60245	1.84513	0.868473	0.385135	NA	ENSG00000230188	processed_pseudogene
ENSG00000241478.1	0.316056	1.60234	3.73084	0.429486	0.66757	NA	HSPA8P9	processed_pseudogene
ENSG00000266111.2	0.48528	1.60214	3.48829	0.459291	0.646025	NA	ENSG00000266111	lncRNA
ENSG00000259890.1	0.327286	1.60196	5.97686	0.268027	0.788679	NA	DNM1P50	unprocessed_pseudogene
ENSG00000143631.11	1.47638	1.60191	2.741	0.584426	0.558934	NA	FLG	protein_coding
ENSG00000250882.1	0.291175	1.60175	5.97687	0.267992	0.788706	NA	ENSG00000250882	lncRNA
ENSG00000257259.3	5.9094	1.60163	0.858544	1.86551	0.0621093	NA	LINC02388	lncRNA
ENSG00000275097.1	1.23724	1.60153	2.16415	0.74003	0.459282	NA	ENSG00000275097	lncRNA
ENSG00000228275.1	0.648897	1.60149	3.78643	0.422955	0.672328	NA	ARMCX3-AS1	lncRNA
ENSG00000257179.1	0.118059	1.60139	5.97715	0.267919	0.788762	NA	HMGN2P6	processed_pseudogene
ENSG00000232470.1	0.849144	1.60139	2.23171	0.717561	0.473028	NA	ENSG00000232470	lncRNA
ENSG00000287587.1	0.990984	1.60118	2.05923	0.777564	0.436826	NA	ENSG00000287587	lncRNA
ENSG00000269119.1	0.644457	1.60093	2.18273	0.733454	0.463281	NA	HNRNPA1P52	processed_pseudogene
ENSG00000226288.3	0.196626	1.6008	5.97716	0.26782	0.788838	NA	OR52I2	protein_coding
ENSG00000274797.1	0.199671	1.60072	5.97691	0.267817	0.78884	NA	ENSG00000274797	lncRNA
ENSG00000241464.3	0.119498	1.60064	5.97779	0.267764	0.788881	NA	RPL39P38	processed_pseudogene
ENSG00000241458.1	0.15489	1.60061	5.97717	0.267787	0.788863	NA	RPL7P19	processed_pseudogene
ENSG00000253341.1	0.41498	1.60056	3.58009	0.447073	0.654823	NA	PCBP2P2	processed_pseudogene
ENSG00000256797.1	0.244727	1.60045	5.52256	0.289802	0.771968	NA	KLRF2	protein_coding
ENSG00000155961.5	0.569612	1.60023	2.49154	0.642263	0.520702	NA	RAB39B	protein_coding
ENSG00000185985.11	590.855	1.6002	0.13904	11.5089	1.18919e-30	2.03513e-27	SLITRK2	protein_coding
ENSG00000235683.1	0.283906	1.6002	4.46727	0.358206	0.720189	NA	ENSG00000235683	processed_pseudogene
ENSG00000273454.1	1.21124	1.59977	2.0641	0.775045	0.438313	NA	ENSG00000273454	lncRNA
ENSG00000257851.2	0.6488	1.59972	2.65734	0.602	0.547174	NA	HNRNPA3P10	processed_pseudogene
ENSG00000275332.1	0.531489	1.59918	3.41966	0.467644	0.64004	NA	ENSG00000275332	lncRNA
ENSG00000273565	1.25745	1.59904	2.44828	0.653127	0.513674	NA	ENSG00000273565	lncRNA
ENSG00000285727.1	0.280046	1.59901	5.97698	0.267528	0.789063	NA	ENSG00000285727	lncRNA
ENSG00000254831.1	0.159986	1.5989	5.9772	0.2675	0.789084	NA	KRT18P58	processed_pseudogene
ENSG00000274351.1	0.627145	1.59865	2.614	0.611573	0.540821	NA	ENSG00000274351	unprocessed_pseudogene
ENSG00000215221.2	0.611365	1.59849	5.64739	0.283049	0.777139	NA	UBA52P6	transcribed_processed_pseudogene
ENSG00000279391.1	0.738341	1.59821	2.74594	0.582026	0.560549	NA	ENSG00000279391	TEC
ENSG00000151617.17	178.131	1.59797	0.253377	6.30668	2.85076e-10	3.31268e-08	EDNRA	protein_coding
ENSG00000186265.10	2.58125	1.59794	1.41997	1.12533	0.260448	NA	BTLA	protein_coding
ENSG00000147041.12	1.93069	1.59778	1.89401	0.843594	0.398896	NA	SYTL5	protein_coding
ENSG00000287850.1	0.373058	1.59765	5.12942	0.311467	0.755445	NA	ENSG00000287850	lncRNA
ENSG00000015592	0.822281	1.59761	2.25739	0.707724	0.479117	NA	STMN4	protein_coding
ENSG00000242034.1	0.681912	1.59745	2.24192	0.712535	0.476133	NA	ENSG00000242034	processed_pseudogene
ENSG00000226976.3	0.167641	1.59738	5.97723	0.267244	0.789281	NA	COX6A1P2	processed_pseudogene
ENSG00000227113.2	1.07664	1.59708	2.08999	0.764154	0.444775	NA	ENSG00000227113	unprocessed_pseudogene
ENSG00000262974.1	0.12062	1.59702	5.97724	0.267183	0.789328	NA	ENSG00000262974	processed_pseudogene
ENSG00000273965.1	0.356166	1.59691	4.20075	0.380148	0.703835	NA	ENSG00000273965	lncRNA
ENSG00000232480	0.711207	1.5964	2.49823	0.639012	0.522815	NA	TGFB2-AS1	lncRNA
ENSG00000255148.2	0.414632	1.59617	4.26452	0.374291	0.708188	NA	ENSG00000255148	lncRNA
ENSG00000184084.7	0.124503	1.59612	5.97726	0.267031	0.789445	NA	ENSG00000184084	processed_pseudogene
ENSG00000131620	21.5799	1.5959	1.71564	0.930211	0.352262	0.681045	ANO1	protein_coding
ENSG00000287642	2.36186	1.59564	1.79793	0.887484	0.374818	NA	ENSG00000287642	lncRNA
ENSG00000270986.1	0.251579	1.59563	5.97711	0.266957	0.789502	NA	HMGB1P51	processed_pseudogene
ENSG00000243007.1	0.834096	1.59539	2.66986	0.597553	0.550138	NA	RPL12P35	processed_pseudogene
ENSG00000216480.2	0.251601	1.59525	5.97727	0.266886	0.789557	NA	ENSG00000216480	processed_pseudogene
ENSG00000223513.1	0.122802	1.59503	5.97728	0.266849	0.789586	NA	ATP6V0E1P2	processed_pseudogene
ENSG00000261604.1	0.597918	1.59465	3.90487	0.408375	0.682999	NA	ENSG00000261604	lncRNA
ENSG00000211640.4	0.12611	1.59459	5.97729	0.266775	0.789643	NA	IGLV6-57	IG_V_gene
ENSG00000237748.1	0.368764	1.5943	3.62439	0.439881	0.660023	NA	UQCRBP1	processed_pseudogene
ENSG00000261664.5	0.57268	1.5941	3.16639	0.503445	0.614651	NA	TTC39A-AS1	lncRNA
ENSG00000265413.1	1.41267	1.5939	2.04671	0.778759	0.436122	NA	ENSG00000265413	lncRNA
ENSG00000233953.1	0.367197	1.59386	3.66364	0.435048	0.663527	NA	ENSG00000233953	lncRNA
ENSG00000250816.1	0.391672	1.59364	4.2836	0.372033	0.709868	NA	DCAF13P2	processed_pseudogene
ENSG00000267476.1	0.131786	1.5936	5.97731	0.266608	0.789771	NA	ENSG00000267476	lncRNA
ENSG00000206828.1	0.731688	1.59346	2.64379	0.60272	0.546695	NA	RNVU1-30	snRNA
ENSG00000249590.7	0.531285	1.59333	3.51701	0.453035	0.650523	NA	ENSG00000249590	protein_coding
ENSG00000287773.1	0.241904	1.593	5.53841	0.287627	0.773632	NA	ENSG00000287773	lncRNA
ENSG00000261628.1	1.30879	1.59295	2.13069	0.747621	0.454689	NA	ENSG00000261628	unprocessed_pseudogene
ENSG00000204071	0.217536	1.59289	5.97732	0.266489	0.789863	NA	TCEAL6	protein_coding
ENSG00000261265.1	0.244604	1.59287	5.97732	0.266485	0.789866	NA	ENSG00000261265	lncRNA
ENSG00000287113.1	0.403541	1.59276	3.61274	0.440872	0.659305	NA	ENSG00000287113	lncRNA
ENSG00000235855.3	0.497517	1.59241	2.54898	0.624727	0.53215	NA	OR7E145P	unprocessed_pseudogene
ENSG00000270549.1	0.200793	1.59215	5.97796	0.266337	0.78998	NA	ENSG00000270549	processed_pseudogene
ENSG00000267554.1	0.163873	1.59188	5.97734	0.266319	0.789993	NA	ENSG00000267554	processed_pseudogene
ENSG00000134363.12	49.5369	1.59179	0.613371	2.59515	0.0094549	0.0772598	FST	protein_coding
ENSG00000281880.2	0.502291	1.59175	3.51658	0.452642	0.650807	NA	PAUPAR	lncRNA
ENSG00000197106.7	0.775493	1.59124	2.67268	0.595372	0.551595	NA	SLC6A17	protein_coding
ENSG00000241527.1	0.91119	1.59106	2.22259	0.715858	0.474079	NA	CA15P1	unitary_pseudogene
ENSG00000288234.1	0.527322	1.59078	2.73159	0.582363	0.560322	NA	ENSG00000288234	lncRNA
ENSG00000257325.1	0.286076	1.59055	5.97731	0.266099	0.790163	NA	ENSG00000257325	lncRNA
ENSG00000198028.4	0.613038	1.58971	3.13641	0.506858	0.612255	NA	ZNF560	protein_coding
ENSG00000223387.6	0.409382	1.58925	4.26388	0.372725	0.709353	NA	LINC02068	lncRNA
ENSG00000235802.1	0.782726	1.58911	2.57632	0.616814	0.537357	NA	HCFC1-AS1	lncRNA
ENSG00000215089.3	0.198782	1.58863	5.97803	0.265746	0.790435	NA	KRT18P11	processed_pseudogene
ENSG00000249263.2	1.22491	1.58851	2.12246	0.74843	0.454201	NA	PARP4P3	transcribed_unprocessed_pseudogene
ENSG00000258466.5	2.72717	1.58848	1.39269	1.14059	0.254042	NA	ENSG00000258466	protein_coding
ENSG00000251660.1	2.92781	1.58822	1.75807	0.903393	0.366317	NA	ENSG00000251660	lncRNA
ENSG00000180221.6	0.379819	1.58819	4.22154	0.376211	0.70676	NA	TPT1P10	processed_pseudogene
ENSG00000226352.2	5.40221	1.58797	0.971901	1.63389	0.102283	NA	PSPC1-AS2	lncRNA
ENSG00000184999.13	0.435007	1.58795	3.18011	0.499338	0.617541	NA	SLC22A10	protein_coding
ENSG00000287926.1	0.774115	1.58773	2.48659	0.638515	0.523138	NA	ENSG00000287926	lncRNA
ENSG00000213277.3	0.593016	1.58766	2.83509	0.560004	0.575477	NA	MARCKSL1P1	processed_pseudogene
ENSG00000262660.1	1.80617	1.58743	2.30875	0.68757	0.491723	NA	ENSG00000262660	protein_coding
ENSG00000236285.1	0.652184	1.58657	2.86907	0.552991	0.58027	NA	NPM1P8	processed_pseudogene
ENSG00000243280.2	0.510575	1.58653	3.59029	0.441894	0.658566	NA	ENSG00000243280	processed_pseudogene
ENSG00000267077.1	0.355427	1.58651	3.18656	0.497875	0.618572	NA	ENSG00000267077	lncRNA
ENSG00000238222.3	0.400043	1.58647	3.17668	0.499411	0.61749	NA	MKRN4P	processed_pseudogene
ENSG00000287372.1	0.608839	1.58624	4.08939	0.387892	0.698096	NA	ENSG00000287372	lncRNA
ENSG00000256678.1	0.191977	1.58607	5.97808	0.265314	0.790767	NA	ENSG00000256678	processed_pseudogene
ENSG00000268472.2	0.302096	1.58597	5.32593	0.297783	0.765869	NA	ENSG00000268472	lncRNA
ENSG00000213051.3	0.0803354	1.58596	5.97808	0.265296	0.790782	NA	RPL5P5	processed_pseudogene
ENSG00000249633.1	0.350496	1.5859	5.18657	0.30577	0.75978	NA	OR52V1P	unprocessed_pseudogene
ENSG00000179611.3	0.359516	1.58584	4.3436	0.365097	0.715039	NA	DGKZP1	processed_pseudogene
ENSG00000130427.3	1.55268	1.58524	1.90444	0.832391	0.405188	NA	EPO	protein_coding
ENSG00000228719.1	0.237204	1.58522	5.55638	0.285297	0.775416	NA	ENSG00000228719	lncRNA
ENSG00000130037.5	4.79	1.58514	1.91943	0.825838	0.408896	NA	KCNA5	protein_coding
ENSG00000261429.2	0.153912	1.58514	5.9781	0.265158	0.790888	NA	DPPA2P4	processed_pseudogene
ENSG00000262039.1	0.33157	1.58498	5.23414	0.302816	0.76203	NA	ENSG00000262039	lncRNA
ENSG00000265369.3	0.237204	1.58479	5.9781	0.265099	0.790933	NA	PCAT18	lncRNA
ENSG00000231098.1	0.610569	1.58466	2.5444	0.622803	0.533414	NA	ENSG00000231098	lncRNA
ENSG00000274341.1	0.498115	1.58466	2.70513	0.585796	0.558013	NA	ENSG00000274341	lncRNA
ENSG00000220793.5	0.585215	1.58453	4.11391	0.385165	0.700115	NA	RPL21P119	processed_pseudogene
ENSG00000075673.12	6.24653	1.58453	1.30104	1.2179	0.223262	NA	ATP12A	protein_coding
ENSG00000260377.1	0.208486	1.58443	5.97811	0.265039	0.790979	NA	ENSG00000260377	lncRNA
ENSG00000180279.7	0.762028	1.5842	2.493	0.635462	0.525127	NA	LINC01869	transcribed_unitary_pseudogene
ENSG00000224382.2	0.166368	1.58397	5.97812	0.264961	0.791039	NA	LINC00703	lncRNA
ENSG00000204694.13	0.272975	1.58396	5.97812	0.26496	0.79104	NA	OR11A1	protein_coding
ENSG00000233610	0.208598	1.58387	5.97812	0.264944	0.791052	NA	LINC00462	lncRNA
ENSG00000227379.2	0.439292	1.58381	3.09902	0.51107	0.609302	NA	PPIAP2	processed_pseudogene
ENSG00000232952.1	0.277913	1.58375	4.47981	0.353531	0.72369	NA	ENSG00000232952	processed_pseudogene
ENSG00000267504.1	0.569405	1.58373	3.2238	0.491262	0.623241	NA	ENSG00000267504	lncRNA
ENSG00000244710.3	0.328305	1.58369	5.23114	0.302744	0.762085	NA	RN7SL47P	misc_RNA
ENSG00000271810.5	2.56544	1.58353	2.04896	0.772846	0.439614	NA	ENSG00000271810	protein_coding
ENSG00000073905.8	0.122254	1.58337	5.97813	0.264859	0.791118	NA	VDAC1P1	processed_pseudogene
ENSG00000255487.1	0.364397	1.58334	5.0782	0.311791	0.755199	NA	ENSG00000255487	lncRNA
ENSG00000205955.4	0.339911	1.58326	5.17369	0.306021	0.759588	NA	HSP90AA5P	transcribed_processed_pseudogene
ENSG00000248634.1	0.977873	1.58311	1.97897	0.799968	0.423729	NA	ENSG00000248634	lncRNA
ENSG00000271765.1	0.487404	1.5828	3.48732	0.453873	0.64992	NA	RN7SKP299	misc_RNA
ENSG00000261527.1	0.411564	1.58263	3.60316	0.439234	0.660492	NA	ENSG00000261527	processed_pseudogene
ENSG00000206869.1	0.115494	1.58252	5.97881	0.264688	0.791249	NA	SNORA70F	snoRNA
ENSG00000278961	1.63623	1.58244	1.94141	0.815099	0.415015	NA	ENSG00000278961	artifact
ENSG00000213315.5	0.200088	1.5821	5.97753	0.264675	0.79126	NA	ENSG00000213315	processed_pseudogene
ENSG00000261872.1	0.457649	1.58207	2.78856	0.567341	0.570483	NA	ENSG00000261872	lncRNA
ENSG00000230955.1	0.154131	1.58185	5.97816	0.264605	0.791313	NA	ENSG00000230955	lncRNA
ENSG00000282246	2.07459	1.58182	2.85142	0.554747	0.579067	NA	NA	NA
ENSG00000246430	0.327192	1.58181	5.98843	0.264145	0.791668	NA	LINC00968	lncRNA
ENSG00000218793.1	0.122291	1.58151	5.97817	0.264547	0.791359	NA	ENSG00000218793	processed_pseudogene
ENSG00000234491.1	0.122292	1.58127	5.97818	0.264507	0.791389	NA	HNRNPA1P51	processed_pseudogene
ENSG00000235480.1	0.40793	1.58119	3.20339	0.4936	0.621588	NA	ENSG00000235480	lncRNA
ENSG00000197054.12	3.11654	1.58077	1.19325	1.32476	0.18525	NA	ZNF763	protein_coding
ENSG00000124664.11	0.639803	1.58076	3.10774	0.508653	0.610996	NA	SPDEF	protein_coding
ENSG00000251211.1	0.122293	1.58072	5.97819	0.264414	0.791461	NA	ENSG00000251211	processed_pseudogene
ENSG00000241907.1	0.59406	1.58034	3.10155	0.509532	0.610379	NA	RPS20P4	processed_pseudogene
ENSG00000225316.3	0.401265	1.58022	3.64857	0.433106	0.664938	NA	LINC00350	lncRNA
ENSG00000259146.4	0.363356	1.58003	4.23499	0.373091	0.709081	NA	SIPA1L1-AS1	lncRNA
ENSG00000283423.1	0.815563	1.57924	2.826	0.558823	0.576283	NA	ENSG00000283423	lncRNA
ENSG00000288218.1	0.293435	1.57915	5.29083	0.29847	0.765345	NA	ENSG00000288218	processed_pseudogene
ENSG00000271447.6	3.31146	1.57912	1.76968	0.89232	0.372222	NA	MMP28	protein_coding
ENSG00000269469.1	0.241756	1.57887	5.97822	0.264103	0.7917	NA	ENSG00000269469	protein_coding
ENSG00000280425.2	0.951652	1.57816	2.15759	0.731444	0.464508	NA	ENSG00000280425	lncRNA
ENSG00000273299.1	0.379789	1.57808	3.70321	0.42614	0.670006	NA	ENSG00000273299	lncRNA
ENSG00000236745.2	0.443402	1.578	2.80927	0.56171	0.574314	NA	YRDCP2	processed_pseudogene
ENSG00000258854.1	0.158448	1.57788	5.97761	0.263964	0.791807	NA	ENSG00000258854	lncRNA
ENSG00000211699.2	0.36318	1.57715	3.5975	0.438403	0.661095	NA	TRGV3	TR_V_gene
ENSG00000269444.1	0.755492	1.57692	2.60832	0.604574	0.545462	NA	ENSG00000269444	lncRNA
ENSG00000224958.6	1.87965	1.57681	1.87878	0.839275	0.401315	NA	PGM5-AS1	lncRNA
ENSG00000227868	0.619158	1.57668	3.20913	0.491312	0.623206	NA	TEX46	protein_coding
ENSG00000250101.1	0.68656	1.57646	3.08889	0.510366	0.609795	NA	ENSG00000250101	lncRNA
ENSG00000146013.11	0.342337	1.57601	5.14846	0.306114	0.759518	NA	GFRA3	protein_coding
ENSG00000226746.2	2.1746	1.57577	1.75839	0.896141	0.370177	NA	SMCR5	lncRNA
ENSG00000287905.1	0.333239	1.57566	5.97829	0.263564	0.792116	NA	ENSG00000287905	lncRNA
ENSG00000124610.5	0.30187	1.57457	5.29944	0.297119	0.766376	NA	H1-1	protein_coding
ENSG00000281491.1	0.276519	1.57441	5.39267	0.291953	0.770323	NA	DNAJB5-DT	lncRNA
ENSG00000286103.1	0.216743	1.57439	5.97831	0.26335	0.792281	NA	ENSG00000286103	lncRNA
ENSG00000216331.2	0.601977	1.57434	3.96399	0.397161	0.691248	NA	H1-12P	unprocessed_pseudogene
ENSG00000233045.1	0.403158	1.57431	4.25565	0.369934	0.711432	NA	RPL15P5	processed_pseudogene
ENSG00000229206.3	0.167745	1.57245	5.97835	0.263024	0.792532	NA	ENSG00000229206	lncRNA
ENSG00000263207.2	1.54258	1.57238	2.19965	0.714829	0.474715	NA	ENSG00000263207	lncRNA
ENSG00000267669.1	0.466011	1.5723	4.84645	0.324422	0.745618	NA	RPLP0P12	transcribed_processed_pseudogene
ENSG00000285570.1	0.768176	1.57148	2.46172	0.638366	0.523235	NA	ENSG00000285570	lncRNA
ENSG00000231187.3	32.2755	1.57102	0.641459	2.44913	0.0143202	0.102035	SYT15-AS1	lncRNA
ENSG00000268751	0.704636	1.57063	2.23421	0.702991	0.482061	NA	SCGB1B2P	lncRNA
ENSG00000262470.2	0.27323	1.57061	5.97929	0.262675	0.792801	NA	TVP23CP2	processed_pseudogene
ENSG00000258926.2	1.42162	1.57049	1.86448	0.842322	0.399608	NA	ENSG00000258926	lncRNA
ENSG00000287337.1	0.877143	1.57025	2.32386	0.675708	0.499226	NA	ENSG00000287337	lncRNA
ENSG00000242979.1	0.342865	1.57007	5.9784	0.262624	0.792841	NA	RPS15AP18	processed_pseudogene
ENSG00000270809.1	0.340174	1.56946	5.21367	0.301028	0.763393	NA	CHCHD2P11	processed_pseudogene
ENSG00000128422	1.44646	1.56944	1.39614	1.12413	0.260959	NA	KRT17	protein_coding
ENSG00000288564.1	1.16098	1.56935	2.75691	0.569243	0.569192	NA	ENSG00000288564	protein_coding
ENSG00000236483.1	0.676091	1.56922	2.35534	0.666241	0.505257	NA	MTND2P40	unprocessed_pseudogene
ENSG00000284858.1	0.255778	1.56912	5.45061	0.287881	0.773438	NA	ENSG00000284858	processed_pseudogene
ENSG00000214676.4	0.118132	1.56912	5.97936	0.262423	0.792996	NA	RPL9P16	processed_pseudogene
ENSG00000225650.2	0.118102	1.5681	5.9794	0.26225	0.793128	NA	EIF2S2P5	processed_pseudogene
ENSG00000281021.1	1.04427	1.56804	2.56379	0.611608	0.540797	NA	ENSG00000281021	lncRNA
ENSG00000286614.1	8.94349	1.56791	1.11144	1.4107	0.158334	0.458789	ENSG00000286614	transcribed_unprocessed_pseudogene
ENSG00000201183.1	0.462801	1.56745	3.07526	0.509697	0.610264	NA	RNVU1-3	snRNA
ENSG00000226237	3.33671	1.56635	1.08333	1.44587	0.148213	NA	GAS1RR	lncRNA
ENSG00000255581.1	1.00624	1.5656	2.35079	0.665988	0.505419	NA	ENSG00000255581	processed_pseudogene
ENSG00000174502.19	1.72286	1.5642	2.22895	0.701768	0.482824	NA	SLC26A9	protein_coding
ENSG00000242062.1	0.562242	1.56395	3.13277	0.499223	0.617623	NA	MARK2P6	processed_pseudogene
ENSG00000186676.3	0.491389	1.56378	3.16641	0.493866	0.621401	NA	EEF1GP1	processed_pseudogene
ENSG00000275569.1	0.765196	1.56338	2.4017	0.650947	0.515081	NA	ENSG00000275569	lncRNA
ENSG00000255449.1	2.66156	1.56334	1.30288	1.19991	0.230174	NA	ENSG00000255449	lncRNA
ENSG00000222004.7	0.480516	1.56299	3.53835	0.441727	0.658686	NA	LINC02860	lncRNA
ENSG00000267582.1	0.620759	1.56216	2.25011	0.694259	0.48752	NA	ENSG00000267582	lncRNA
ENSG00000136352	61.3354	1.56152	0.311773	5.0085	5.48554e-07	2.5881e-05	NKX2-1	protein_coding
ENSG00000142748	0.160573	1.56095	5.9785	0.261094	0.79402	NA	FCN3	protein_coding
ENSG00000235491.1	0.114781	1.5606	5.97971	0.260982	0.794106	NA	LINC01889	lncRNA
ENSG00000269944.1	0.83093	1.56029	2.39674	0.651006	0.515043	NA	ENSG00000269944	lncRNA
ENSG00000268095.1	0.156152	1.56025	5.97972	0.260924	0.794151	NA	ZNF649-AS1	lncRNA
ENSG00000228674.4	0.197612	1.56019	5.97972	0.260913	0.79416	NA	PPIAP59	processed_pseudogene
ENSG00000270554.1	0.4218	1.56005	5.03616	0.30977	0.756736	NA	ENSG00000270554	processed_pseudogene
ENSG00000259906.1	0.500842	1.55963	4.13157	0.377492	0.705808	NA	ENSG00000259906	lncRNA
ENSG00000278275.2	0.441665	1.55959	4.89292	0.318744	0.749921	NA	ENSG00000278275	transcribed_processed_pseudogene
ENSG00000124491.16	46.443	1.55903	1.46298	1.06565	0.286581	0.62007	F13A1	protein_coding
ENSG00000206178.2	0.19802	1.5589	5.97978	0.260696	0.794327	NA	HBZP1	unprocessed_pseudogene
ENSG00000260158.1	0.726317	1.55888	3.08808	0.504805	0.613696	NA	ENSG00000260158	lncRNA
ENSG00000236761.6	0.114744	1.55879	5.97978	0.260677	0.794341	NA	CTAGE9	protein_coding
ENSG00000213049.3	0.160698	1.55836	5.9798	0.260604	0.794398	NA	HNRNPA1P34	processed_pseudogene
ENSG00000174948.6	0.114724	1.55813	5.97981	0.260565	0.794428	NA	GPR149	protein_coding
ENSG00000286830.1	1.85072	1.5581	1.51621	1.02763	0.304126	NA	ENSG00000286830	lncRNA
ENSG00000258649	0.622038	1.55799	3.19074	0.488284	0.625348	NA	ENSG00000258649	lncRNA
ENSG00000212440.1	0.204058	1.55767	5.97983	0.260487	0.794488	NA	SNORA75	snoRNA
ENSG00000260470.1	0.582173	1.55766	4.03412	0.386121	0.699407	NA	ENSG00000260470	lncRNA
ENSG00000201542.1	0.0786711	1.55762	5.97983	0.260478	0.794495	NA	SNORA62	snoRNA
ENSG00000201600.1	0.0786711	1.55762	5.97983	0.260478	0.794495	NA	RN7SKP124	misc_RNA
ENSG00000213226.4	0.0786711	1.55762	5.97983	0.260478	0.794495	NA	ENSG00000213226	processed_pseudogene
ENSG00000239532.1	0.0786711	1.55762	5.97983	0.260478	0.794495	NA	ENSG00000239532	processed_pseudogene
ENSG00000241221.2	0.0786711	1.55762	5.97983	0.260478	0.794495	NA	MTND4LP17	unprocessed_pseudogene
ENSG00000251271.3	0.0786711	1.55762	5.97983	0.260478	0.794495	NA	ALG1L7P	unprocessed_pseudogene
ENSG00000255447.1	0.0786711	1.55762	5.97983	0.260478	0.794495	NA	ENSG00000255447	lncRNA
ENSG00000255608.1	0.0786711	1.55762	5.97983	0.260478	0.794495	NA	ENSG00000255608	lncRNA
ENSG00000256195.3	0.0786711	1.55762	5.97983	0.260478	0.794495	NA	ENSG00000256195	lncRNA
ENSG00000259870.1	0.0786711	1.55762	5.97983	0.260478	0.794495	NA	ENSG00000259870	lncRNA
ENSG00000260722.1	0.0786711	1.55762	5.97983	0.260478	0.794495	NA	VN1R67P	unitary_pseudogene
ENSG00000266610.2	0.0786711	1.55762	5.97983	0.260478	0.794495	NA	RN7SL176P	misc_RNA
ENSG00000267039.1	0.0786711	1.55762	5.97983	0.260478	0.794495	NA	ENSG00000267039	lncRNA
ENSG00000267436.1	0.0786711	1.55762	5.97983	0.260478	0.794495	NA	ENSG00000267436	lncRNA
ENSG00000268184.1	0.0786711	1.55762	5.97983	0.260478	0.794495	NA	ENSG00000268184	lncRNA
ENSG00000275728.1	0.0786711	1.55762	5.97983	0.260478	0.794495	NA	ENSG00000275728	lncRNA
ENSG00000276569.1	0.0786711	1.55762	5.97983	0.260478	0.794495	NA	ENSG00000276569	processed_pseudogene
ENSG00000280380.1	0.0786711	1.55762	5.97983	0.260478	0.794495	NA	ENSG00000280380	TEC
ENSG00000287034.1	0.0786711	1.55762	5.97983	0.260478	0.794495	NA	ENSG00000287034	lncRNA
ENSG00000188801.9	0.710977	1.55758	4.61387	0.337586	0.735675	NA	ZNF322P1	processed_pseudogene
ENSG00000174332	8.84501	1.55747	0.848279	1.83603	0.0663525	0.277884	GLIS1	protein_coding
ENSG00000237963.1	0.150745	1.55744	5.97984	0.260449	0.794518	NA	PRXL2CP1	processed_pseudogene
ENSG00000277247.1	0.283494	1.55738	5.97984	0.260439	0.794525	NA	ENSG00000277247	lncRNA
ENSG00000237870.6	0.115437	1.55716	5.97985	0.260401	0.794554	NA	ENSG00000237870	lncRNA
ENSG00000233854.2	0.196504	1.55706	5.97985	0.260385	0.794567	NA	POU6F2-AS2	lncRNA
ENSG00000264666	5.76134	1.55675	1.00363	1.55111	0.120875	NA	ENSG00000264666	lncRNA
ENSG00000250821.3	0.724001	1.55657	3.15286	0.4937	0.621518	NA	EXOC1L	protein_coding
ENSG00000254759.1	0.870099	1.5565	1.74594	0.891497	0.372662	NA	NAP1L1P1	processed_pseudogene
ENSG00000237070.1	0.345684	1.55648	5.16605	0.301291	0.763193	NA	ENSG00000237070	lncRNA
ENSG00000260008.1	0.452503	1.55612	4.14166	0.375725	0.707122	NA	ENSG00000260008	lncRNA
ENSG00000274615.1	12.1247	1.55605	2.68922	0.578623	0.562843	0.832615	NPEPPSP1	unprocessed_pseudogene
ENSG00000214695.3	0.359534	1.55599	5.9799	0.260203	0.794707	NA	NPAP1P2	processed_pseudogene
ENSG00000135226.18	0.162502	1.55579	5.97991	0.260169	0.794733	NA	UGT2B28	protein_coding
ENSG00000274363.1	1.4429	1.55567	1.60275	0.970625	0.331735	NA	ENSG00000274363	lncRNA
ENSG00000231615.2	0.155103	1.55564	5.97991	0.260145	0.794752	NA	ENSG00000231615	processed_pseudogene
ENSG00000224769.1	0.849613	1.5553	3.86574	0.402329	0.687442	NA	MUC20P1	unprocessed_pseudogene
ENSG00000283994.1	0.162504	1.55524	5.97993	0.260077	0.794805	NA	ENSG00000283994	lncRNA
ENSG00000233246.1	0.711595	1.55501	2.82962	0.549547	0.58263	NA	PHC2-AS1	lncRNA
ENSG00000224745	0.662515	1.55464	2.64766	0.587175	0.557086	NA	NA	NA
ENSG00000260747.1	0.158201	1.55437	5.97996	0.25993	0.794918	NA	ENSG00000260747	processed_pseudogene
ENSG00000257869.1	0.587613	1.55435	3.07382	0.505674	0.613086	NA	ENSG00000257869	lncRNA
ENSG00000232579.1	0.377963	1.55433	4.25953	0.364906	0.715181	NA	MTCO1P27	unprocessed_pseudogene
ENSG00000286628.1	0.152218	1.55406	5.97998	0.259877	0.794959	NA	ENSG00000286628	lncRNA
ENSG00000255222.1	0.540204	1.55402	2.84302	0.546609	0.584647	NA	SETP17	processed_pseudogene
ENSG00000250267.2	0.160985	1.55399	5.97998	0.259865	0.794968	NA	ENSG00000250267	lncRNA
ENSG00000162391.12	0.470862	1.55339	5.86471	0.264871	0.791109	NA	FAM151A	protein_coding
ENSG00000215893.3	0.481968	1.55339	4.96189	0.313064	0.754232	NA	RPL23AP17	processed_pseudogene
ENSG00000268307.1	2.04725	1.55329	1.23394	1.25881	0.208101	NA	LINC02560	lncRNA
ENSG00000254741.1	0.119919	1.55317	5.98001	0.259727	0.795074	NA	ENSG00000254741	lncRNA
ENSG00000268545.1	0.437933	1.55289	3.57012	0.434969	0.663585	NA	VN1R107P	unprocessed_pseudogene
ENSG00000234572.1	1.65896	1.55284	1.57444	0.986283	0.323994	NA	LINC01800	lncRNA
ENSG00000237679.2	0.361263	1.55264	4.28809	0.362082	0.717291	NA	VDAC1P11	processed_pseudogene
ENSG00000225358.1	0.252933	1.55232	5.98005	0.259582	0.795186	NA	MIPEPP1	processed_pseudogene
ENSG00000172346.15	5.70061	1.55206	1.31313	1.18196	0.237223	NA	CSDC2	protein_coding
ENSG00000274157.1	0.251641	1.5518	5.98007	0.259495	0.795254	NA	ENSG00000274157	processed_pseudogene
ENSG00000231084.2	2.53463	1.55171	1.00153	1.54934	0.1213	NA	RPL22P24	processed_pseudogene
ENSG00000274051.1	1.67535	1.55097	1.47643	1.05049	0.293495	NA	ENSG00000274051	misc_RNA
ENSG00000271225.1	0.161772	1.55071	5.98012	0.259311	0.795396	NA	BNIP3P4	processed_pseudogene
ENSG00000259275	2.86716	1.5502	1.29568	1.19644	0.231526	NA	ENSG00000259275	lncRNA
ENSG00000236085.1	0.286202	1.54975	5.98015	0.259149	0.79552	NA	ACTG1P4	processed_pseudogene
ENSG00000177757.2	3.78041	1.54953	1.0221	1.51602	0.129514	NA	FAM87B	lncRNA
ENSG00000237613.2	0.272986	1.54931	5.9803	0.259069	0.795582	NA	FAM138A	lncRNA
ENSG00000273269.3	0.117807	1.54931	5.98017	0.259074	0.795578	NA	ENSG00000273269	protein_coding
ENSG00000213402.3	0.311221	1.54915	5.98018	0.259048	0.795598	NA	PTPRCAP	protein_coding
ENSG00000264150.1	0.399837	1.54898	4.12246	0.375743	0.707108	NA	ENSG00000264150	processed_pseudogene
ENSG00000285010	0.236256	1.54898	5.98019	0.259019	0.795621	NA	OOSP4A	protein_coding
ENSG00000178562.18	1.44171	1.54897	3.91795	0.395352	0.692583	NA	CD28	protein_coding
ENSG00000234352.9	1.92713	1.54865	2.07663	0.745751	0.455818	NA	ENSG00000234352	lncRNA
ENSG00000257373.1	0.321128	1.54853	5.25144	0.294877	0.768088	NA	ENSG00000257373	lncRNA
ENSG00000256189.1	0.165191	1.54849	5.98021	0.258936	0.795684	NA	ENSG00000256189	processed_pseudogene
ENSG00000215227.4	0.117777	1.54822	5.98022	0.25889	0.79572	NA	NUTF2P5	processed_pseudogene
ENSG00000241429.1	0.276239	1.54789	5.98023	0.258834	0.795763	NA	EEF1A1P25	processed_pseudogene
ENSG00000266569.2	0.119939	1.5477	5.98024	0.258802	0.795788	NA	RN7SL377P	misc_RNA
ENSG00000260282.1	0.121234	1.54769	5.98024	0.258801	0.795789	NA	EIF4EBP2P2	processed_pseudogene
ENSG00000254684.1	0.118856	1.54729	5.98026	0.258733	0.795841	NA	ENSG00000254684	processed_pseudogene
ENSG00000249274.1	2.27374	1.54718	1.4642	1.05667	0.290661	NA	PDLIM1P4	processed_pseudogene
ENSG00000137090.12	0.436109	1.54715	4.15404	0.372445	0.709561	NA	DMRT1	protein_coding
ENSG00000232002.2	0.420012	1.54686	3.61021	0.428469	0.66831	NA	LINC01880	lncRNA
ENSG00000260262.1	0.121602	1.546	5.98031	0.258514	0.79601	NA	ENSG00000260262	lncRNA
ENSG00000227890.1	0.205549	1.54568	5.98032	0.258461	0.796051	NA	PSMA2P3	processed_pseudogene
ENSG00000269886.1	1.503	1.54564	1.54423	1.00092	0.316866	NA	ENSG00000269886	lncRNA
ENSG00000233134.1	0.123188	1.54525	5.98034	0.258388	0.796107	NA	MTND3P17	unprocessed_pseudogene
ENSG00000258935.1	0.409848	1.54481	3.57082	0.432621	0.66529	NA	ENSG00000258935	lncRNA
ENSG00000273816.1	0.157043	1.54479	5.98036	0.258311	0.796167	NA	ENSG00000273816	lncRNA
ENSG00000271382.1	1.06149	1.54472	1.67025	0.924843	0.355047	NA	ENSG00000271382	lncRNA
ENSG00000258422	0.524318	1.54468	4.06646	0.379858	0.704051	NA	ENSG00000258422	lncRNA
ENSG00000232027.2	1.4051	1.54466	1.56146	0.989244	0.322544	NA	ENSG00000232027	processed_pseudogene
ENSG00000107187.17	0.333204	1.54446	5.2255	0.295562	0.767565	NA	LHX3	protein_coding
ENSG00000242242	4.95577	1.54403	0.960023	1.60833	0.107763	NA	NECTIN3-AS1	lncRNA
ENSG00000153684	0.482286	1.5437	5.96527	0.258782	0.795803	NA	GOLGA8F	protein_coding
ENSG00000272192	1.83602	1.54359	1.546	0.998442	0.318065	NA	PDE7A-DT	lncRNA
ENSG00000225111	0.199618	1.54343	5.98042	0.258081	0.796345	NA	ENSG00000225111	lncRNA
ENSG00000231378.1	0.121121	1.54319	5.98043	0.25804	0.796376	NA	NDUFAF4P4	processed_pseudogene
ENSG00000222448.1	2.63382	1.54305	1.35202	1.14129	0.25375	NA	RN7SKP150	misc_RNA
ENSG00000283148.1	0.128795	1.54281	5.98044	0.257976	0.796426	NA	ENSG00000283148	lncRNA
ENSG00000243014.1	0.114255	1.5427	5.98045	0.257956	0.796441	NA	PTMAP8	processed_pseudogene
ENSG00000233416.1	1.22815	1.5424	1.56337	0.986586	0.323846	NA	RPS25P3	processed_pseudogene
ENSG00000235748.1	1.98512	1.54136	1.58093	0.974972	0.329574	NA	SEPTIN14P12	processed_pseudogene
ENSG00000239317.1	0.253244	1.54112	5.98051	0.257691	0.796645	NA	RPL35AP17	processed_pseudogene
ENSG00000223576.2	0.729972	1.54103	4.02406	0.382955	0.701753	NA	ENSG00000223576	lncRNA
ENSG00000213137.3	0.203569	1.54073	5.98053	0.257625	0.796696	NA	ARF1P2	processed_pseudogene
ENSG00000255974.8	0.59044	1.54071	2.59302	0.594176	0.552395	NA	CYP2A6	protein_coding
ENSG00000165084.16	25.7128	1.5406	0.515727	2.98725	0.00281501	0.0316752	C8orf34	protein_coding
ENSG00000272699.1	1.63871	1.54024	1.49349	1.0313	0.302399	NA	ENSG00000272699	lncRNA
ENSG00000269502.6	1.49095	1.53976	1.70787	0.901566	0.367288	NA	DMRTC1	protein_coding
ENSG00000244229.1	0.28713	1.53944	5.98058	0.257407	0.796865	NA	RPL26P35	processed_pseudogene
ENSG00000224066.1	2.73751	1.53855	1.1428	1.3463	0.178207	NA	ENSG00000224066	lncRNA
ENSG00000255260.1	0.164676	1.53793	5.98065	0.257152	0.797062	NA	ENSG00000255260	lncRNA
ENSG00000240005	0.22589	1.53622	5.97534	0.257093	0.797107	NA	STIM2-AS1	lncRNA
ENSG00000106178.7	2.01272	1.53456	1.48006	1.03682	0.29982	NA	CCL24	protein_coding
ENSG00000264968.1	1.16078	1.53442	1.91731	0.800301	0.423537	NA	ENSG00000264968	lncRNA
ENSG00000242419.6	1.38831	1.53438	1.75002	0.876779	0.380607	NA	PCDHGC4	protein_coding
ENSG00000223646.2	0.327865	1.53298	4.34389	0.352904	0.72416	NA	ENSG00000223646	lncRNA
ENSG00000203734.13	5.39484	1.53276	0.801352	1.91272	0.0557845	NA	ECT2L	protein_coding
ENSG00000250645.1	2.17399	1.53247	1.43315	1.06931	0.284932	NA	ENSG00000250645	processed_pseudogene
ENSG00000232333.1	0.460285	1.5319	4.00319	0.382669	0.701965	NA	RPS27AP2	processed_pseudogene
ENSG00000279800.2	1.58512	1.5317	1.89184	0.809634	0.418151	NA	BCLAF1P2	processed_pseudogene
ENSG00000177551.5	1.55076	1.53066	2.17778	0.702853	0.482147	NA	NHLH2	protein_coding
ENSG00000274966.1	0.325658	1.53012	5.98097	0.255831	0.798081	NA	ENSG00000274966	unprocessed_pseudogene
ENSG00000261040	0.937562	1.52971	2.38475	0.641457	0.521226	NA	WFDC21P	transcribed_unitary_pseudogene
ENSG00000260740.2	1.67037	1.52959	1.57857	0.968968	0.332561	NA	ENSG00000260740	lncRNA
ENSG00000228262	2.82435	1.52955	1.15457	1.32478	0.185244	NA	LINC01320	lncRNA
ENSG00000187686.4	4.24401	1.5291	0.857369	1.78348	0.0745084	NA	KRT18P59	transcribed_processed_pseudogene
ENSG00000236166.1	0.415131	1.52785	4.26198	0.358483	0.719982	NA	LINC02921	lncRNA
ENSG00000253973.3	1.61407	1.52743	2.08286	0.733329	0.463358	NA	NRIP3-DT	lncRNA
ENSG00000261192.1	0.127715	1.52499	5.97868	0.255071	0.798668	NA	RNF126P1	transcribed_processed_pseudogene
ENSG00000259364.1	1.12205	1.52478	1.91431	0.796517	0.425732	NA	ENSG00000259364	lncRNA
ENSG00000275221.2	8.88139	1.52461	1.05222	1.44895	0.147351	0.442265	H2AC15	protein_coding
ENSG00000278084.1	0.230598	1.52421	5.98122	0.254833	0.798852	NA	ENSG00000278084	lncRNA
ENSG00000111077.18	24.9197	1.52331	0.708231	2.15086	0.031487	0.172009	TNS2	protein_coding
ENSG00000258010.4	0.460219	1.51878	4.22853	0.359174	0.719465	NA	ENSG00000258010	lncRNA
ENSG00000224993.3	0.818218	1.51874	2.0683	0.734291	0.462772	NA	RPL29P12	processed_pseudogene
ENSG00000288225.1	3.05461	1.51847	1.03643	1.46509	0.142896	NA	ENSG00000288225	processed_pseudogene
ENSG00000233117.4	1.71208	1.51832	1.84095	0.824749	0.409514	NA	LINC00702	lncRNA
ENSG00000260186.5	0.385263	1.51594	4.19928	0.361001	0.718099	NA	LINC02137	lncRNA
ENSG00000253633.2	1.47557	1.51501	1.75618	0.862673	0.388317	NA	ENSG00000253633	lncRNA
ENSG00000227666.1	5.47905	1.51292	0.799853	1.8915	0.0585577	NA	CYCSP24	processed_pseudogene
ENSG00000100311.17	37.0657	1.51285	0.802824	1.88441	0.0595099	0.260347	PDGFB	protein_coding
ENSG00000222046.3	2.47461	1.51199	1.3524	1.11801	0.263563	NA	DCDC2B	protein_coding
ENSG00000229122.1	3.37599	1.51006	0.979254	1.54205	0.12306	NA	AGBL5-IT1	lncRNA
ENSG00000224165	13.6985	1.50693	1.18307	1.27375	0.202753	0.521353	DNAJC27-AS1	lncRNA
ENSG00000261570.2	1.43316	1.50683	1.75208	0.860022	0.389777	NA	AGK-DT	lncRNA
ENSG00000204338.8	1.47936	1.50653	2.17893	0.691405	0.489311	NA	CYP21A1P	transcribed_unprocessed_pseudogene
ENSG00000146521	0.661329	1.5045	2.73346	0.550401	0.582045	NA	LINC01558	lncRNA
ENSG00000259744.1	2.76524	1.50416	1.06008	1.41891	0.155925	NA	ENSG00000259744	lncRNA
ENSG00000256152.2	1.18116	1.50366	4.09157	0.367503	0.713244	NA	ENSG00000256152	lncRNA
ENSG00000179136	5.31343	1.50307	1.20678	1.24552	0.21294	NA	LINC00670	lncRNA
ENSG00000260978	5.52361	1.50032	1.13038	1.32727	0.18442	NA	ENSG00000260978	lncRNA
ENSG00000241769.7	6.2091	1.49973	1.03338	1.45128	0.146701	NA	EOLA1-DT	lncRNA
ENSG00000189334.9	1.04956	1.49817	2.12247	0.705863	0.480273	NA	S100A14	protein_coding
ENSG00000070808.17	1.11373	1.49776	2.31068	0.648189	0.516862	NA	CAMK2A	protein_coding
ENSG00000249624.10	14.0871	1.49633	0.945226	1.58304	0.113413	0.381335	ENSG00000249624	protein_coding
ENSG00000162894.12	3.92632	1.49577	1.02284	1.46237	0.143639	NA	FCMR	protein_coding
ENSG00000080224	28.5761	1.49512	1.00475	1.48806	0.136735	0.42465	EPHA6	protein_coding
ENSG00000286132.1	25.3028	1.495	0.852539	1.75359	0.0795009	0.310241	ENSG00000286132	protein_coding
ENSG00000268603	1.64527	1.49487	1.48494	1.00669	0.314086	NA	ENSG00000268603	lncRNA
ENSG00000239002.3	4.10718	1.49389	0.943383	1.58355	0.113296	NA	SCARNA10	snoRNA
ENSG00000235413.3	2.15577	1.49382	1.39606	1.07003	0.284606	NA	KRT18P63	processed_pseudogene
ENSG00000231934.2	2.72748	1.49257	1.71305	0.871297	0.383592	NA	FAM242A	lncRNA
ENSG00000272973	1.92103	1.49253	1.45875	1.02316	0.306232	NA	ENSG00000272973	lncRNA
ENSG00000259113.1	1.83342	1.48992	1.29227	1.15295	0.248932	NA	ENSG00000259113	lncRNA
ENSG00000162761.14	62.072	1.48886	0.560093	2.65824	0.00785493	0.0684022	LMX1A	protein_coding
ENSG00000165973.19	140.971	1.48626	0.482909	3.07772	0.00208592	0.0253338	NELL1	protein_coding
ENSG00000235508.3	2.02422	1.48568	1.35764	1.09431	0.273818	NA	RPS2P7	processed_pseudogene
ENSG00000185046	28.1497	1.48526	0.785441	1.89098	0.0586265	0.257773	ANKS1B	protein_coding
ENSG00000178568.15	105.434	1.48273	0.585287	2.53334	0.011298	0.0875966	ERBB4	protein_coding
ENSG00000183160.9	1.76379	1.4824	1.61502	0.917882	0.358681	NA	TMEM119	protein_coding
ENSG00000259357.2	4.41643	1.48219	1.30839	1.13284	0.257282	NA	ENSG00000259357	lncRNA
ENSG00000236155	1.70531	1.4821	1.63435	0.906845	0.364489	NA	ZPLD2P	transcribed_unitary_pseudogene
ENSG00000258623.1	2.45357	1.48208	1.19374	1.24155	0.214403	NA	ENSG00000258623	lncRNA
ENSG00000199691.1	2.49173	1.48094	1.16134	1.2752	0.20224	NA	RN7SKP173	misc_RNA
ENSG00000259327.1	2.10564	1.48028	2.63268	0.56227	0.573932	NA	ENSG00000259327	lncRNA
ENSG00000237248.5	2.31309	1.47917	1.24887	1.18441	0.236251	NA	LINC00987	lncRNA
ENSG00000275576.1	1.65986	1.47818	1.40552	1.05169	0.292942	NA	ENSG00000275576	lncRNA
ENSG00000130700.7	92.4421	1.47756	1.17418	1.25838	0.208255	0.528783	GATA5	protein_coding
ENSG00000273055.1	7.25581	1.47593	0.83976	1.75757	0.0788214	0.309164	ENSG00000273055	lncRNA
ENSG00000171564.12	0.517798	1.47572	3.46024	0.426479	0.669759	NA	FGB	protein_coding
ENSG00000255026.1	5.44533	1.4752	1.16383	1.26753	0.204965	NA	ENSG00000255026	lncRNA
ENSG00000146453.13	8.04657	1.47517	0.893803	1.65044	0.0988521	0.352508	PNLDC1	protein_coding
ENSG00000278743	2.48903	1.47498	1.22479	1.20428	0.228482	NA	ENSG00000278743	lncRNA
ENSG00000273265.1	1.74347	1.47493	1.6132	0.914288	0.360565	NA	CNNM3-DT	lncRNA
ENSG00000187942.12	1.82026	1.47447	1.7691	0.833458	0.404586	NA	LDLRAD2	protein_coding
ENSG00000101331.17	27.0418	1.47429	0.556429	2.64955	0.00805991	0.0697278	CCM2L	protein_coding
ENSG00000211683.3	5.68177	1.47247	0.941612	1.56378	0.117869	NA	ENSG00000211683	lncRNA
ENSG00000254363.6	3.51752	1.47239	1.53596	0.958615	0.337753	NA	ENSG00000254363	lncRNA
ENSG00000142621	4.33299	1.47122	1.27939	1.14994	0.250168	NA	FHAD1	protein_coding
ENSG00000285838.2	0.828001	1.46762	2.65983	0.551773	0.581104	NA	ENSG00000285838	lncRNA
ENSG00000270540.1	5.34427	1.46705	1.19811	1.22446	0.220778	NA	ENSG00000270540	lncRNA
ENSG00000272663.1	3.16825	1.46691	1.1713	1.25237	0.210434	NA	PPP1R21-DT	lncRNA
ENSG00000254862.5	3.39624	1.4665	1.28736	1.13915	0.254641	NA	LGR4-AS1	lncRNA
ENSG00000259666.3	1.35031	1.4662	1.84185	0.796048	0.426004	NA	LINGO1-AS1	lncRNA
ENSG00000261113.1	1.10759	1.46552	1.86443	0.786044	0.431842	NA	ENSG00000261113	lncRNA
ENSG00000166856.3	5.45599	1.46532	0.847166	1.72967	0.0836887	NA	GPR182	protein_coding
ENSG00000146592.17	15.5633	1.46487	0.805239	1.81918	0.0688842	0.283876	CREB5	protein_coding
ENSG00000286447.1	8.11377	1.46412	1.04786	1.39725	0.162338	0.463382	ENSG00000286447	lncRNA
ENSG00000199313.1	0.319304	1.464	3.72545	0.392973	0.694339	NA	RNU4-82P	snRNA
ENSG00000165828.15	1.02562	1.46398	3.70685	0.39494	0.692887	NA	PRAP1	protein_coding
ENSG00000214313	0.358101	1.46351	5.15066	0.28414	0.776303	NA	AZGP1P1	transcribed_unprocessed_pseudogene
ENSG00000185634.12	49.4062	1.46317	0.615352	2.37778	0.0174171	0.117057	SHC4	protein_coding
ENSG00000267567.1	1.32456	1.4631	1.37303	1.0656	0.286605	NA	ENSG00000267567	lncRNA
ENSG00000248801.7	5.63096	1.46222	1.38655	1.05458	0.291619	NA	C8orf34-AS1	lncRNA
ENSG00000130598	0.683988	1.46212	2.5354	0.576684	0.564153	NA	TNNI2	protein_coding
ENSG00000231290	5.96542	1.46189	1.03288	1.41535	0.156965	NA	APCDD1L-DT	lncRNA
ENSG00000130948.10	0.542625	1.46183	4.76074	0.307059	0.758798	NA	HSD17B3	protein_coding
ENSG00000225595.2	1.29515	1.46177	2.12214	0.688819	0.490937	NA	LINC01623	lncRNA
ENSG00000272760.1	6.38186	1.46144	3.05058	0.479071	0.631888	0.866225	ENSG00000272760	lncRNA
ENSG00000175164.16	0.424641	1.46131	5.99238	0.243861	0.807339	NA	ABO	protein_coding
ENSG00000268119	4.72947	1.45848	1.10066	1.32509	0.18514	NA	ENSG00000268119	lncRNA
ENSG00000253199.2	0.138865	1.45831	5.97586	0.244034	0.807204	NA	LINC02153	lncRNA
ENSG00000182230	2.52659	1.4558	1.88414	0.772663	0.439722	NA	NA	NA
ENSG00000285870.1	2.58041	1.45302	1.32717	1.09482	0.273595	NA	ENSG00000285870	lncRNA
ENSG00000130643.9	3.95643	1.45294	1.53773	0.944857	0.344732	NA	CALY	protein_coding
ENSG00000123096.12	2.4601	1.45268	2.52737	0.574781	0.565439	NA	SSPN	protein_coding
ENSG00000242252.2	6.64802	1.45122	0.74467	1.9488	0.0513189	0.236784	BGLAP	protein_coding
ENSG00000275695.1	2.91049	1.45082	1.3387	1.08375	0.278474	NA	UBE2Q2P6	transcribed_unprocessed_pseudogene
ENSG00000229839.6	10.9246	1.45018	1.11684	1.29847	0.194126	0.508223	ENSG00000229839	lncRNA
ENSG00000233783.8	5.78011	1.44944	1.00683	1.43961	0.149979	NA	ENSG00000233783	lncRNA
ENSG00000262265.2	2.79364	1.44887	1.2029	1.20449	0.228401	NA	ENSG00000262265	lncRNA
ENSG00000287021.1	5.08368	1.44502	0.870773	1.65946	0.0970224	NA	ENSG00000287021	lncRNA
ENSG00000256574.8	0.293654	1.44259	5.98277	0.241124	0.809459	NA	OR13A1	protein_coding
ENSG00000236833.1	3.88604	1.44139	1.00396	1.43571	0.151085	NA	ENSG00000236833	lncRNA
ENSG00000236914.4	10.2389	1.44083	0.89801	1.60447	0.108611	0.371998	LINC01852	lncRNA
ENSG00000164776	19.4244	1.44029	0.452824	3.18068	0.00146928	0.0195887	PHKG1	protein_coding
ENSG00000135638.14	143.298	1.43717	0.276382	5.19993	1.99362e-07	1.07535e-05	EMX1	protein_coding
ENSG00000278177.1	5.13051	1.43451	1.34085	1.06985	0.284687	NA	ENSG00000278177	lncRNA
ENSG00000171532.5	18.1926	1.43356	1.33608	1.07296	0.28329	0.616541	NEUROD2	protein_coding
ENSG00000155875.15	2.56034	1.43167	1.53019	0.935615	0.349471	NA	SAXO1	protein_coding
[truncated: 36,267 more rows]
