# Supplementary material for: The PRC2.1 subcomplex opposes G1 progression through regulation of CCND1 and CCND2
Source: eLife. 2025 Feb 4;13:RP97577. doi: 10.7554/eLife.97577 (PMC11793871; doi:10.7554/eLife.97577)
Supplement: Supplementary file 5. [file elife-97577-supp5.xlsx]

## Sheet: Cell Lines
Cell Line Number	Parental Cell Line	Genotype	Species	Media Composition
CAL003	HAP1	Cas9 C2.17	Homo sapiens	IMDM - 10% FBS, 1x P/S
CAL001	HEK293T	WT	Homo sapiens	DMEM - 10% FBS, 2mM Glu, 1x P/S
CAL342	KBM7	WT	Homo sapiens	IMDM - 10% FBS, 1x P/S
CAL333	LNCaP M-1 #2166	WT	Homo sapiens	DMEM - 10% FBS, 2mM Glu, 1x P/S
CAL334	MDA-MB-231	WT	Homo sapiens	DMEM - 10% FBS, 2mM Glu, 1x P/S
CAL382	COS7	WT	Homo sapiens	DMEM - 10% FBS, 2mM Glu, 1x P/S
CAL384	NR-6	WT	Homo sapiens	DMEM - 10% FBS, 2mM Glu, 1x P/S
CAL283	HAP1	Cas9 C2.17, SUZ12 gRNA 1 Clone B5	Homo sapiens	IMDM - 10% FBS, 1x P/S
CAL284	HAP1	Cas9 C2.17, SUZ12 gRNA 1 Clone C2	Homo sapiens	IMDM - 10% FBS, 1x P/S
CAL285	HAP1	Cas9 C2.17, SUZ12 gRNA 1 Clone D3	Homo sapiens	IMDM - 10% FBS, 1x P/S
CAL348	HAP1	Cas9 C2.17 MTF2 gRNA 4 Clone B6	Homo sapiens	IMDM - 10% FBS, 1x P/S
CAL350	HAP1	Cas9 C2.17 MTF2 gRNA 4 Clone A2	Homo sapiens	IMDM - 10% FBS, 1x P/S
CAL352	HAP1	Cas9 C2.17 MTF2 gRNA 4 Clone C4	Homo sapiens	IMDM - 10% FBS, 1x P/S
CAL356	HAP1	Cas9 C2.17 JARID2 gRNA 1 Clone B2	Homo sapiens	IMDM - 10% FBS, 1x P/S
CAL357	HAP1	Cas9 C2.17 JARID2 gRNA 1 Clone B6	Homo sapiens	IMDM - 10% FBS, 1x P/S
CAL358	HAP1	Cas9 C2.17 JARID2 gRNA 1 Clone C1	Homo sapiens	IMDM - 10% FBS, 1x P/S
CAL385	HAP1	Cas9 C2.17, 2xFLAG-2xStrep-CDK6-G418	Homo sapiens	IMDM - 10% FBS, 1x P/S
CAL386	HAP1	Cas9 C2.17, SUZ12 gRNA 1 Clone B5, 2xFLAG-2xStrep-CDK6-G418	Homo sapiens	IMDM - 10% FBS, 1x P/S
CAL387	HAP1	Cas9 C2.17, SUZ12 gRNA 1 Clone C2, 2xFLAG-2xStrep-CDK6-G418	Homo sapiens	IMDM - 10% FBS, 1x P/S
CAL388	HAP1	Cas9 C2.17 MTF2 gRNA 4 Clone B6, 2xFLAG-2xStrep-CDK6-G418	Homo sapiens	IMDM - 10% FBS, 1x P/S
CAL389	HAP1	Cas9 C2.17 MTF2 gRNA 4 Clone A2, 2xFLAG-2xStrep-CDK6-G418	Homo sapiens	IMDM - 10% FBS, 1x P/S
CAL390	HAP1	Cas9 C2.17 JARID2 gRNA 1 Clone B2, 2xFLAG-2xStrep-CDK6-G418	Homo sapiens	IMDM - 10% FBS, 1x P/S
CAL391	HAP1	Cas9 C2.17 JARID2 gRNA 1 Clone B6, 2xFLAG-2xStrep-CDK6-G418	Homo sapiens	IMDM - 10% FBS, 1x P/S
CAL393	HAP1	Cas9 C2.17, pLVX-pTetON-CCND1	Homo sapiens	IMDM - 10% FBS, 1x P/S
CAL394	HAP1	Cas9 C2.17, pLVX-pTetON-CCND1-HA	Homo sapiens	IMDM - 10% FBS, 1x P/S
CAL395	HAP1	Cas9 C2.17, pLVX-pTetON-CCND2	Homo sapiens	IMDM - 10% FBS, 1x P/S
CAL396	HAP1	Cas9 C2.17, pLVX-pTetON-CCND2-HA	Homo sapiens	IMDM - 10% FBS, 1x P/S
CAL411	MDA-MB-231	pKLO.1-SUZ12-shRNA#1-GFP	Homo sapiens	DMEM - 10% FBS, 2mM Glu, 1x P/S
CAL412	MDA-MB-231	pKLO.1-SUZ12-shRNA#2-GFP	Homo sapiens	DMEM - 10% FBS, 2mM Glu, 1x P/S
CAL413	MDA-MB-231	pKLO.1-MTF2-shRNA#1-GFP	Homo sapiens	DMEM - 10% FBS, 2mM Glu, 1x P/S
CAL414	MDA-MB-231	pKLO.1-MTF2-shRNA#2-GFP	Homo sapiens	DMEM - 10% FBS, 2mM Glu, 1x P/S
CAL415	MDA-MB-231	pKLO.1-JARID2-shRNA#1-GFP	Homo sapiens	DMEM - 10% FBS, 2mM Glu, 1x P/S
CAL416	MDA-MB-231	pKLO.1-JARID2-shRNA#2-GFP	Homo sapiens	DMEM - 10% FBS, 2mM Glu, 1x P/S
CAL417	MDA-MB-231	pKLO.1-SUZ12-shRNA#3-GFP	Homo sapiens	DMEM - 10% FBS, 2mM Glu, 1x P/S
CAL418	MDA-MB-231	pKLO.1-Control-shRNA#1-GFP	Homo sapiens	DMEM - 10% FBS, 2mM Glu, 1x P/S
CAL419	MDA-MB-231	pKLO.1-Control-shRNA#1-GFP	Homo sapiens	DMEM - 10% FBS, 2mM Glu, 1x P/S
CAL429	COS7	pKLO.1-SUZ12-shRNA#1-GFP	Homo sapiens	DMEM - 10% FBS, 2mM Glu, 1x P/S
CAL430	COS7	pKLO.1-SUZ12-shRNA#2-GFP	Homo sapiens	DMEM - 10% FBS, 2mM Glu, 1x P/S
CAL431	COS7	pKLO.1-MTF2-shRNA#1-GFP	Homo sapiens	DMEM - 10% FBS, 2mM Glu, 1x P/S
CAL432	COS7	pKLO.1-MTF2-shRNA#2-GFP	Homo sapiens	DMEM - 10% FBS, 2mM Glu, 1x P/S
CAL433	COS7	pKLO.1-JARID2-shRNA#1-GFP	Homo sapiens	DMEM - 10% FBS, 2mM Glu, 1x P/S
CAL434	COS7	pKLO.1-JARID2-shRNA#2-GFP	Homo sapiens	DMEM - 10% FBS, 2mM Glu, 1x P/S
CAL435	COS7	pKLO.1-SUZ12-shRNA#3-GFP	Homo sapiens	DMEM - 10% FBS, 2mM Glu, 1x P/S
CAL436	COS7	pKLO.1-Control-shRNA#1-GFP	Homo sapiens	DMEM - 10% FBS, 2mM Glu, 1x P/S
CAL437	COS7	pKLO.1-Control-shRNA#1-GFP	Homo sapiens	DMEM - 10% FBS, 2mM Glu, 1x P/S

## Sheet: Chemicals
Chemical	Supplier	Part Number
Camptothecin	Selleckchem	S1288
Colchicine	Sigma-Aldrich	C9754
Palbociclib	Sigma-Aldrich	PZ0383
Abermaciclib	MedChemExpress	HY-16297
Ribociclib	Selleckchem	S7440
Rotenone	ApexBio	B5462
TTFA	Abcam	ab223880
Antimycin A	Simga-Aldrich	A8674
Oligomycin	Simga-Aldrich	75351
MB-3	Simga-Aldrich	M2449
Pladienolide B	Tocris	6070
GSK126	Simga-Aldrich	5005800001
Crystal Violet	Simga-Aldrich	C0775
Bovine Serum Albumin	Simga-Aldrich	A4503
Non-fat Dry Milk	Lab Scientific bioKEMIX	M0842
Propidium Iodine	Simga-Aldrich	P4170
Ribonuclease A	MP Biomedicals	ICN10107691
Spermidine	Simga-Aldrich	85558
--mercaptoethanol	Simga-Aldrich	M6250
DMSO, sterile	Simga-Aldrich	D2438
Sodium citrate tribasic dihydrate	Simga-Aldrich	S4641
Tween-20	Fisher Scientific	BP337
TritionX-100	Fisher Scientific	BP151
10mg/mL Puromycin	Fisher Scientific	NC9138068
10mg/mL Blasticidin	ThermoFisher	A11139-03
Doxycycline hyclate	Simga-Aldrich	D9891
HEPES	Simga-Aldrich	H3375
Potassium chloride	Simga-Aldrich	P9541
Magneisum chloride hexahydrate	Simga-Aldrich	M9272
Sodium chloride	Simga-Aldrich	S9888
Calcium chloride dihydrate	Simga-Aldrich	C3306
Manganese chloride	Simga-Aldrich	63535
EDTA disodium salt dihydrate	Simga-Aldrich	BP120
EGTA	Simga-Aldrich	E3889
GlycoBlue	Ambion	AM9516
Sodium acetate	Simga-Aldrich	S2889

## Sheet: Kits and Reagents
Name	Company	Catalog Number
BD Pharmigen BrdU Flow Kits FITC BrdU	BD Bioscience	559619
DNA Clean & Concentrator - 5	Zymo	R1015
Gel DNA Recovery Kit	Zymo	11-301
RNA Clean and Concentrator - 25	Zymo	R1017
DNase I Set (1,500 U)	Zymo	E1011
SensiFAST Lo-Rox 2000 Reactions	Meridian/Bioline	BIO-94020
Tetro First Strand cDNA Synthesis Kit 100 Reactions	Meridian/Bioline	BIO-65043
FITC Annexin V Apoptosis Detection Kit	Biolegend	640914
Pierce ECL Western Blotting Substrate	Thermo Scientific	32109
Licor Intercept Blocking Buffer	Licor	927-70001
FuGene HD Transfection Reagent	Promega	E2311
PrestoBlue Cell Viability Reagent	Invitrogen	A13262
Pierce BCA Assay	Thermo Scientific	23227
TRIzol Reagent	Ambion	15596018
Qiagen MiniPreps	Qiagen	27106
cOmplete Protease Inhibitor Mini Tablet (EDTA-Free)	Roche	4693159001
PhospSTOP Mini Tablet	Roche	4906837000
2S Plus DNA Library Kit	Swift Biosciences	10009877
L-Glutamine (200mM)	Thermo Scientific	25-030-081
FBS	Gibco	8751
1x IMDM	Gibco	12440061
1x DMEM	Gibco	12440061
1x 0.25% Trypsin-EDTA	Gibco	25200114
1x PBS (No MgCl2, No CaCl2)	Gibco	14190-114
1x OptiMEM	Gibco	31985
100X Antibiotic-Antimycotic	Thermo Scientific	15240062
SPRIselect	Beckman Coulter	B23318
Concanavalin A Conjugated Paramagnetic Beads	EpiCypher	21-1401
Countess Cell Counting Chamber Slides	Invitrogen	C10283

## Sheet: Antibodies
Antibody	Host	Dilution	Buffer	Catalog Number
RB1	Mouse	1 to 2000	5% Milk - PBST	CST #9309
P-S807/S811-RB1	Rabbit	1 to 1000	5% BSA - TBST	CST #8516
Actin	Mouse	1 to 5000	Licor + 0.2% Tween20	Sigma A5441
Vinculin	Mouse	1 to 1000	Licor + 0.2% Tween20	Sigma V9131
CCND1	Rabbit	1 to 200	3% Milk - PBST	Abcam ab16663
EZH2	Rabbit	1 to 1000	5% BSA - PBST	CST #5246
H3K27me3	Rabbit	1 to 1000	5% BSA - PBST	CST# 9733
p27 (F-8)	Mouse	1 to 200	5% Milk - PBST	SCBT - sc-1641
Histone H3	Rabbit	1 to 5000	Licor + 0.2% Tween20	Abcam ab1791
p16	Rabbit	1 to 1000	5% BSA - PBST	CST 92803
SUZ12	Rabbit	1 to 1000	5% BSA - PBST	CST 3737S
AEBP2	Rabbit	1 to 1000	3% BSA - PBST	CST 14129S
MTF2	Rabbit	1 to 1000	3% Milk - PBST	Proteintech 16208-1-AP
RBL1/p107	Rabbit	1 to 1000	5% BSA - PBST	CST #89798
RBL2/p130	Rabbit	1 to 1000	5% Milk - PBST	CST #13610
CDK4	Rabbit	1 to 1000	5% BSA - PBST	CST #12790
CDK6	Rabbit	1 to 1000	5% BSA - PBST	CST #13331
JARID2	Rabbit	1 to 1000	3% Milk - PBST	CST# 13594
EED	Rabbit	1 to 1000	5% Milk - PBST	CST# 51673
CCND2	Rabbit	1 to 1000	5% BSA - PBST	CST #3741
CCND3	Mouse	1 to 2000	5% Milk - PBST	CST #2936
Phospho-Histone H2A.X (Ser139)	Rabbit	1 to 1000	5% Milk - PBST	CST #9718
Histone H2A	Rabbit	1 to 1000	5% BSA - PBST	CST #12349
Goat Anti-Mouse IgG (H+L)-HRP	Goat	1 to 10,000	-	Biorad #1721011
Goat Anti-Rabbit IgG (H + L)-HRP	Goat	1 to 10,000	-	Biorad #1706515
IRDye® 800CW Goat anti-Mouse IgG	Goat	1 to 10,000	-	Licor #926-32210
IRDye® 680RD Goat anti-Rabbit IgG	Goat	1 to 10,000	-	Licor #926-68071
H3K27me3 (for CUT&RUN)	Rabbit	-	-	Millipore # 07-449
PARP	Rabbit	1 to 1000	5% Milk - PBST	CST#9542
BIM	Rabbit	1 to 750	5% Milk - PBST	CST#2933
CDK2	Rabbit	1 to 1000	5% Milk - PBST	CST# 18048S
p53	Rabbit	1 to 1000	5% Milk - PBST	CST#9282

## Sheet: Oligos
Oligo Name	Sequence	Purpose
EZH2_gRNA1_Sense	CACCGACTGGGAAGAAATCTGAGAA	Cloning into pLentiGuidePuro
EZH2_gRNA1_Antisense	AAACTTCTCAGATTTCTTCCCAGTC	Cloning into pLentiGuidePuro
EZH2_gRNA2_Sense	CACCGACCAAGAATGGAAACAGCGA	Cloning into pLentiGuidePuro
EZH2_gRNA2_Antisense	AAACTCGCTGTTTCCATTCTTGGTC	Cloning into pLentiGuidePuro
EZH2_gRNA3_Sense	CACCGGATCTGGAGGATCACCGAGA	Cloning into pLentiGuidePuro
EZH2_gRNA3_Antisense	AAACTCTCGGTGATCCTCCAGATCC	Cloning into pLentiGuidePuro
SUZ12_gRNA1_Sense	CACCGGCTTCGGGCGGCAAATCCGG	Cloning into pLentiGuidePuro - used to make monoclonal cell line
SUZ12_gRNA1_Antisense	AAACCCGGATTTGCCGCCCGAAGCC	Cloning into pLentiGuidePuro
SUZ12_gRNA2_Sense	CACCGAAGGAGAGCAAGAATCTCAT	Cloning into pLentiGuidePuro
SUZ12_gRNA2_Antisense	AAACATGAGATTCTTGCTCTCCTTC	Cloning into pLentiGuidePuro
SUZ12_gRNA3_Sense	CACCGTTACTGGAAACTGCAAGGGA	Cloning into pLentiGuidePuro
SUZ12_gRNA3_Antisense	AAACTCCCTTGCAGTTTCCAGTAAC	Cloning into pLentiGuidePuro
EED_gRNA1_Sense	CACCGGGCGGGAACAGACATGCCTG	Cloning into pLentiGuidePuro
EED_gRNA1_Antisense	AAACCAGGCATGTCTGTTCCCGCCC	Cloning into pLentiGuidePuro
EED_gRNA2_Sense	CACCGGATCCAGCTACAGCCAGCAG	Cloning into pLentiGuidePuro
EED_gRNA2_Antisense	AAACCTGCTGGCTGTAGCTGGATCC	Cloning into pLentiGuidePuro
EED_gRNA3_Sense	CACCGTTGTAGCACTATGTTGGCCA	Cloning into pLentiGuidePuro
EED_gRNA3_Antisense	AAACTGGCCAACATAGTGCTACAAC	Cloning into pLentiGuidePuro
MTF2_gRNA1_Sense	CACCGAACTGGGATAGATTGCACCC	Cloning into pLentiGuidePuro - used to make monoclonal cell line
MTF2_gRNA1_Antisense	AAACGGGTGCAATCTATCCCAGTTC	Cloning into pLentiGuidePuro
MTF2_gRNA2_Sense	CACCGAGTGCTGCAAATGTAAGCAG	Cloning into pLentiGuidePuro
MTF2_gRNA2_Antisense	AAACCTGCTTACATTTGCAGCACTC	Cloning into pLentiGuidePuro
MTF2_gRNA3_Sense	CACCGGCAGACATTACCCTATAGTG	Cloning into pLentiGuidePuro
MTF2_gRNA3_Antisense	AAACCACTATAGGGTAATGTCTGCC	Cloning into pLentiGuidePuro - used to make monoclonal cell line
JARID2_gRNA1_Sense	CACCGTGAGCAAGGAAAGACCCAAG	Cloning into pLentiGuidePuro
JARID2_gRNA1_Antisense	AAACCTTGGGTCTTTCCTTGCTCAC	Cloning into pLentiGuidePuro
JARID2_gRNA2_Sense	CACCGCAGAAGAGGCAGCATGCGGA	Cloning into pLentiGuidePuro
JARID2_gRNA2_Antisense	AAACTCCGCATGCTGCCTCTTCTGC	Cloning into pLentiGuidePuro
JARID2_gRNA3_Sense	CACCGCCTTAGACTGGTCATTACCA	Cloning into pLentiGuidePuro
JARID2_gRNA3_Antisense	AAACTGGTAATGACCAGTCTAAGGC	Cloning into pLentiGuidePuro
AEBP2_gRNA1_Sense	CACCGGCGGCGCTGCTGCTGAACGG	Cloning into pLentiGuidePuro
AEBP2_gRNA1_Antisense	AAACCCGTTCAGCAGCAGCGCCGCC	Cloning into pLentiGuidePuro
AEBP2_gRNA2_Sense	CACCGAGCAGCGTAGTCTCCAGCGG	Cloning into pLentiGuidePuro
AEBP2_gRNA2_Antisense	AAACCCGCTGGAGACTACGCTGCTC	Cloning into pLentiGuidePuro
AEBP2_gRNA3_Sense	CACCGGTAGACAGCACAATTTCCAG	Cloning into pLentiGuidePuro
AEBP2_gRNA3_Antisense	AAACCTGGAAATTGTGCTGTCTACC	Cloning into pLentiGuidePuro
RB1_sgRNA1_Sense	CACCGAGAGCAGGACAGCGGCCCGG	Cloning into pLentiGuidePuro
RB1_sgRNA1_Antisense	AAACCCGGGCCGCTGTCCTGCTCTC	Cloning into pLentiGuidePuro
RB1_sgRNA2_Sense	CACCGTTGGGAGAAAGTTTCATCTG	Cloning into pLentiGuidePuro
RB1_sgRNA2_Antisense	AAACCAGATGAAACTTTCTCCCAAC	Cloning into pLentiGuidePuro
RB1_gRNA3_Sense	CACCGTCACCTCGAACACCCAGGCG	Cloning into pLentiGuidePuro
RB1_gRNA3_Antisense	AAACCGCCTGGGTGTTCGAGGTGAC	Cloning into pLentiGuidePuro
CCNE1_gRNA1_Sense	CACCGGGAGCGGGACACCATGAAGG	Cloning into pLentiGuidePuro
CCNE1_gRNA1_Antisense	AAACCCTTCATGGTGTCCCGCTCCC	Cloning into pLentiGuidePuro
CCNE1_gRNA2_Sense	CACCGACTGACCTCAGTACAGGCAG	Cloning into pLentiGuidePuro
CCNE1_gRNA2_Antisense	AAACCTGCCTGTACTGAGGTCAGTC	Cloning into pLentiGuidePuro
CCNE1_gRNA3_Sense	CACCGAGGAGATGAAATTCTCACCA	Cloning into pLentiGuidePuro
CCNE1_gRNA3_Antisense	AAACTGGTGAGAATTTCATCTCCTC	Cloning into pLentiGuidePuro
Beta-Actin_qPCR_F	ACCCAGAAGACTGTGGATGG	qRT-PCR
Beta-Actin_qPCR_R	TTCAGCTCAGGGATGACCTT	qRT-PCR
CCND1_qRT-PCR_F	CAATGACCCCGCACGATTTC	qRT-PCR
CCND1_qRT-PCR_R	ATGAACTTCACATCTGTGGCA	qRT-PCR
CCND2_qRT-PCR_F	ACGGTACTGCTGCAGGCTAT	qRT-PCR
CCND2_qRT-PCR_R	AGCTGCTGGCTAAGATCACC	qRT-PCR
CCND2_qRT-PCR_F	GAACCTGGCAGCTGTCACTC	qRT-PCR
CCND2_qRT-PCR_R	ATGGCAAACTTAAAGTCGGTGG	qRT-PCR
CCND3_qRT-PCR_F	AGATCAAGCCGCACATGCGGAA	qRT-PCR
CCND3_qRT-PCR_R	ACGCAAGACAGGTAGCGATCCA	qRT-PCR
SUZ12_shRNA1_Sense	GTACCGCTGACAATCAAATGAATCATCTCGAGATGATTCATTTGATTGTCAGCTTTTTG	Cloning into pKLO.1
SUZ12_shRNA1_Antisense	AATTCAAAAAGCTGACAATCAAATGAATCATCTCGAGATGATTCATTTGATTGTCAGCG	Cloning into pKLO.1
SUZ12_shRNA2_Sense	GTACCGCTTACGTTTACTGGTTTCTTCTCGAGAAGAAACCAGTAAACGTAAGCTTTTTG	Cloning into pKLO.1
SUZ12_shRNA2_Antisense	AATTCAAAAAGCTTACGTTTACTGGTTTCTTCTCGAGAAGAAACCAGTAAACGTAAGCG	Cloning into pKLO.1
MTF2_shRNA1_Sense	GTACCGAACTCCATTACCAGTTATTTCTCGAGAAATAACTGGTAATGGAGTTCTTTTTG	Cloning into pKLO.1
MTF2_shRNA1_Antisense	AATTCAAAAAGAACTCCATTACCAGTTATTTCTCGAGAAATAACTGGTAATGGAGTTCG	Cloning into pKLO.1
MTF2_shRNA2_Sense	GTACCGCATGTTCTGGAGGCATTAAACTCGAGTTTAATGCCTCCAGAACATGCTTTTTG	Cloning into pKLO.1
MTF2_shRNA2_Antisense	AATTCAAAAAGCATGTTCTGGAGGCATTAAACTCGAGTTTAATGCCTCCAGAACATGCG	Cloning into pKLO.1
JARID2_shRNA1_Sense	GTACCCAACGCCCGTGGTCGATTTATCTCGAGATAAATCGACCACGGGCGTTGTTTTTG	Cloning into pKLO.1
JARID2_shRNA1_Antisense	AATTCAAAAACAACGCCCGTGGTCGATTTATCTCGAGATAAATCGACCACGGGCGTTGG	Cloning into pKLO.1
JARID2_shRNA2_Sense	GTACCTTATCGAACAGCGAGGAATATCTCGAGATATTCCTCGCTGTTCGATAATTTTTG	Cloning into pKLO.1
JARID2_shRNA2_Antisense	AATTCAAAAATTATCGAACAGCGAGGAATATCTCGAGATATTCCTCGCTGTTCGATAAG	Cloning into pKLO.1
